# Supplementary material for: Integrated metabolomic and transcriptomic analysis of Pogostemon cablin shed new light on the complete biosynthesis pathway of pogostone
Source: Front Plant Sci. 2025 Feb 17;16:1510184. doi: 10.3389/fpls.2025.1510184 (PMC11872920; doi:10.3389/fpls.2025.1510184)
Supplement: Supplementary Table 2 — Expression and annotation of all genes and transcripts from patchouli transcriptome data. [file Table2.xlsx]

## Sheet: Sheet1
Index	Platform	Q1 (Da)	Q3 (Da)	Quantitative ion	Qualitative ion	Molecular weight (Da)	Formula	Ionization model	Compounds	物质	Class I	物质一级分类	Class II	物质二级分类	CAS	Level	NIST_RI	Odor	Threshold	Root-1	Root-2	Root-3	Stem-1	Stem-2	Stem-3	Leaf-1	Leaf-2	Leaf-3	QC01	QC02	QC03	cpd_ID	kegg_map	mw_cpd_ID	mw_map
mws0260	UPLC-MS/MS	175.12	116.07	-	-	174.112	C6H14N4O2	[M+H]+	L-Arginine	L-精氨酸	Amino acids and derivatives	氨基酸及其衍生物	Amino acids and derivatives	氨基酸及其衍生物	74-79-3	1	-	-	-	2.00966e+06	2.16537e+06	2.15152e+06	9.19727e+06	3.56538e+06	8.77036e+06	9.55305e+06	1.01701e+07	8.49598e+06	6.61011e+06	8.08497e+06	8.21408e+06	C00062	ko00220,ko00261,ko00330,ko00470,ko00970,ko01100,ko01110,ko01230,ko02010	C00062	-
mws0219	UPLC-MS/MS	132.03	88.04	-	-	133.037	C4H7NO4	[M-H]-	L-Aspartic Acid	L-天冬氨酸	Amino acids and derivatives	氨基酸及其衍生物	Amino acids and derivatives	氨基酸及其衍生物	56-84-8	3	-	-	-	1.22091e+06	1.53044e+06	1.76139e+06	1.93718e+06	1.48026e+06	1.58652e+06	2.54931e+06	2.57767e+06	1.61729e+06	1.50805e+06	2.02039e+06	2.31714e+06	C00049	ko00220,ko00250,ko00260,ko00261,ko00270,ko00300,ko00340,ko00410,ko00460,ko00470,ko00710,ko00760,ko00770,ko00970,ko00999,ko01100,ko01110,ko01200,ko01210,ko01230,ko01240,ko02010	C00049	-
Wcdp000832	UPLC-MS/MS	146.12	100.11	-	-	145.11	C7H15NO2	[M+H]+	N-Methylisoleucine	N-甲基异亮氨酸	Amino acids and derivatives	氨基酸及其衍生物	Amino acids and derivatives	氨基酸及其衍生物	39554-61-5	1	-	-	-	1.05516e+06	1.15748e+06	1.72109e+06	1.47577e+07	2.08395e+07	9.25376e+06	9.6657e+06	1.5608e+07	1.9733e+07	1.27623e+07	6.11452e+06	1.30826e+07	-	-	-	-
pme0021	UPLC-MS/MS	166.09	120.08	-	-	165.079	C9H11NO2	[M+H]+	L-Phenylalanine	L-苯丙氨酸	Amino acids and derivatives	氨基酸及其衍生物	Amino acids and derivatives	氨基酸及其衍生物	63-91-2	1	-	-	-	1.31969e+06	1.32936e+06	1.17677e+06	3.27634e+06	3.09514e+06	3.58213e+06	5.65551e+06	5.41984e+06	4.16031e+06	2.89179e+06	3.38942e+06	3.43434e+06	C00079	ko00360,ko00400,ko00460,ko00470,ko00940,ko00960,ko00966,ko00970,ko00996,ko00999,ko01100,ko01110,ko01210,ko01230,ko02010	C00079	-
mws1587	UPLC-MS/MS	132.1	86.1	-	-	131.095	C6H13NO2	[M+H]+	L-Norleucine*	L-正亮氨酸*	Amino acids and derivatives	氨基酸及其衍生物	Amino acids and derivatives	氨基酸及其衍生物	327-57-1	1	-	-	-	6.20704e+07	6.21558e+07	5.83904e+07	1.00558e+08	1.02671e+08	1.05026e+08	1.49104e+08	1.36319e+08	1.42606e+08	7.78751e+07	8.26599e+07	7.87531e+07	C01933	-	C01933	-
Zmzp000145	UPLC-MS/MS	189.16	84.08	-	-	188.153	C9H20N2O2	[M+H]+	Trimethyllysine	三甲基赖氨酸	Amino acids and derivatives	氨基酸及其衍生物	Amino acids and derivatives	氨基酸及其衍生物	23284-33-5	1	-	-	-	3.55321e+06	3.49848e+06	3.15266e+06	4.74682e+06	4.61562e+06	4.94868e+06	3.51122e+06	3.669e+06	3.41331e+06	3.22504e+06	3.64589e+06	3.7774e+06	C03793	ko00310,ko01100	C03793	-
Zbqp003444	UPLC-MS/MS	217.16	84.04	-	-	216.147	C10H20N2O3	[M+H]+	4-amino-5-oxo-5-(pentylamino)pentanoic acid	4-氨基-5-氧代-5-(戊氨基)戊酸	Amino acids and derivatives	氨基酸及其衍生物	Amino acids and derivatives	氨基酸及其衍生物	-	1	-	-	-	832704	883391	888354	7.96062e+06	8.34316e+06	8.85961e+06	1.96207e+06	1.90317e+06	1.86695e+06	3.19447e+06	3.51391e+06	3.2449e+06	-	-	-	-
Zbqp001937	UPLC-MS/MS	203.14	130.05	-	-	202.132	C9H18N2O3	[M+H]+	2,6-diamino-7-methyl-5-oxooctanoic acid	2,6-二氨基-7-甲基-5-氧代辛酸	Amino acids and derivatives	氨基酸及其衍生物	Amino acids and derivatives	氨基酸及其衍生物	-	1	-	-	-	967829	1.06985e+06	1.0157e+06	7.90004e+06	7.62123e+06	8.76444e+06	3.46949e+06	3.28088e+06	3.05784e+06	3.02757e+06	3.69624e+06	3.18005e+06	-	-	-	-
Zbqp003189	UPLC-MS/MS	217.15	144.08	-	-	216.147	C10H20N2O3	[M+H]+	Val-Val	缬氨酸-缬氨酸	Amino acids and derivatives	氨基酸及其衍生物	Amino acids and derivatives	氨基酸及其衍生物	3918-94-3	1	-	-	-	27118.3	27118.3	27118.3	166937	150801	181261	276258	230697	244887	135591	175031	136587	-	-	-	-
Zazp002547	UPLC-MS/MS	205.1	146.06	-	-	204.09	C11H12N2O2	[M+H]+	cyclo-(Gly-Phe)	环(丙氨酰-苯丙氨酸)	Amino acids and derivatives	氨基酸及其衍生物	Amino acids and derivatives	氨基酸及其衍生物	10125-07-2	1	-	-	-	1.05202e+07	1.2927e+07	1.22364e+07	1.14259e+08	1.11269e+08	1.11716e+08	1.33526e+07	1.43176e+07	1.02205e+07	5.02328e+07	6.05161e+07	6.09689e+07	-	-	-	-
Zmdp002216	UPLC-MS/MS	261.14	86.1	-	-	260.137	C11H20N2O5	[M+H]+	L-γ-Glutamyl-L-leucine	L-γ-谷氨酰胺-L-亮氨酸	Amino acids and derivatives	氨基酸及其衍生物	Amino acids and derivatives	氨基酸及其衍生物	2566-39-4	1	-	-	-	5.79077e+06	6.81163e+06	5.88132e+06	1.65241e+06	2.06095e+06	1.91038e+06	977787	967521	721223	2.10501e+06	2.70271e+06	2.57175e+06	-	-	-	-
mws0282	UPLC-MS/MS	203.08	116.05	-	-	204.09	C11H12N2O2	[M-H]-	L-Tryptophan	L-色氨酸	Amino acids and derivatives	氨基酸及其衍生物	Amino acids and derivatives	氨基酸及其衍生物	73-22-3	1	-	-	-	1.87553e+06	1.821e+06	2.29046e+06	4.4768e+07	3.47275e+07	4.44164e+07	1.41536e+06	1.66945e+06	1.54725e+06	9.30822e+06	9.21659e+06	9.00222e+06	C00078	ko00260,ko00380,ko00400,ko00901,ko00966,ko00970,ko00996,ko00999,ko01100,ko01110,ko01210,ko01230,ko01240	C00078	-
Zbqp002414	UPLC-MS/MS	261.15	132.1	-	-	260.137	C11H20N2O5	[M+H]+	h-gamma-Glu-leu-oh	h-γ-谷氨酸-亮氨酸-羟基	Amino acids and derivatives	氨基酸及其衍生物	Amino acids and derivatives	氨基酸及其衍生物	-	1	-	-	-	536335	626378	543352	191952	217247	191130	86104	99526.6	79004.4	210117	261437	233776	-	-	-	-
Zbqp002313	UPLC-MS/MS	203.14	84.04	-	-	202.132	C9H18N2O3	[M+H]+	4-amino-5-(butylamino)-5-oxopentanoic acid	4-氨基-5-(丁基氨基)-5-氧代戊酸	Amino acids and derivatives	氨基酸及其衍生物	Amino acids and derivatives	氨基酸及其衍生物	-	1	-	-	-	3.79419e+06	4.27021e+06	3.71945e+06	3.2905e+07	3.38795e+07	3.62623e+07	1.45647e+07	1.56506e+07	1.27957e+07	1.18547e+07	1.53561e+07	1.48062e+07	-	-	-	-
Zbfp001070	UPLC-MS/MS	328.12	166.07	-	-	327.111	C18H17NO5	[M+H]+	N-Caffeoylphenylalanine	N-咖啡酰苯丙氨酸	Amino acids and derivatives	氨基酸及其衍生物	Amino acids and derivatives	氨基酸及其衍生物	-	1	-	-	-	2.63642e+07	2.58539e+07	2.44943e+07	1.50486e+07	1.78217e+07	1.85398e+07	1.61751e+07	1.4027e+07	1.43213e+07	1.5225e+07	1.74354e+07	1.56509e+07	-	-	-	-
Lmhp001430	UPLC-MS/MS	227.1	116.07	-	-	226.095	C10H14N2O4	[M+H]+	Cyclo(Pro-Glu)	环(脯氨酸-谷氨酸)	Amino acids and derivatives	氨基酸及其衍生物	Amino acids and derivatives	氨基酸及其衍生物	-	1	-	-	-	131941	152005	157771	319103	265593	310880	773739	824704	758235	470025	445665	416341	-	-	-	-
Zmdp001647	UPLC-MS/MS	247.13	184.1	-	-	246.122	C10H18N2O5	[M+H]+	γ-Glutamyl-L-valine	γ-谷氨酰胺缬氨酸	Amino acids and derivatives	氨基酸及其衍生物	Amino acids and derivatives	氨基酸及其衍生物	-	2	-	-	-	454162	478642	469753	210690	227575	278908	115021	146617	110657	213994	254662	259247	-	-	-	-
Zmmp000635	UPLC-MS/MS	130.09	84.08	-	-	129.079	C6H11NO2	[M+H]+	2-amino-4-methyl-4-pentenoic acid	2-氨基-4-甲基-4-戊烯酸	Amino acids and derivatives	氨基酸及其衍生物	Amino acids and derivatives	氨基酸及其衍生物	-	2	-	-	-	1.37658e+07	1.45353e+07	1.43074e+07	7.94369e+07	8.13812e+07	7.94066e+07	6.81106e+07	7.49934e+07	6.52502e+07	6.3273e+07	6.73637e+07	6.57006e+07	-	-	-	-
Zmmp002946	UPLC-MS/MS	295.13	120.08	-	-	294.122	C14H18N2O5	[M+H]+	(3-(carboxyamino)-2-methylpropanoyl)phenylalanine	(3-(羧氨基)-2-甲基丙酰基)苯丙氨酸	Amino acids and derivatives	氨基酸及其衍生物	Amino acids and derivatives	氨基酸及其衍生物	-	2	-	-	-	1.16951e+06	1.50226e+06	1.41295e+06	488204	567117	538679	391466	544535	436695	569995	800485	645659	-	-	-	-
Lcsp001861	UPLC-MS/MS	229.15	116.07	-	-	228.147	C11H20N2O3	[M+H]+	Leu-Pro	亮氨酰-脯氨酸	Amino acids and derivatives	氨基酸及其衍生物	Amino acids and derivatives	氨基酸及其衍生物	-	2	-	-	-	641967	684615	594633	269266	284221	240710	326193	359936	308661	357713	408643	389928	-	-	-	-
Zmdp000292	UPLC-MS/MS	189.14	70.07	-	-	188.127	C7H16N4O2	[M+H]+	Arginine methyl ester*	精氨酸甲酯*	Amino acids and derivatives	氨基酸及其衍生物	Amino acids and derivatives	氨基酸及其衍生物	-	3	-	-	-	188513	215196	269434	566823	550446	536356	729868	720742	671936	457727	368319	363569	-	-	-	-
pmb0464	UPLC-MS/MS	458.15	116.03	-	-	457.143	C16H27NO14	[M+H]+	L-Aspartic acid-O-diglucoside	L-天冬氨酸-O-二葡萄糖苷	Amino acids and derivatives	氨基酸及其衍生物	Amino acids and derivatives	氨基酸及其衍生物	-	3	-	-	-	285410	137163	208600	128271	120480	158837	21777.9	39281.7	26083.8	87745.2	107923	120467	-	-	-	-
Lmrj002087	UPLC-MS/MS	247.13	86.09	-	-	246.122	C10H18N2O5	[M+H]+	L-Isoleucyl-L-Aspartate	L-异亮氨酰-L-天冬氨酸	Amino acids and derivatives	氨基酸及其衍生物	Amino acids and derivatives	氨基酸及其衍生物	-	3	-	-	-	308504	353553	336550	367737	351957	345069	252592	288362	230304	181051	237393	250904	-	-	-	-
mws0250	UPLC-MS/MS	182.08	136.08	-	-	181.074	C9H11NO3	[M+H]+	L-Tyrosine*	L-酪氨酸*	Amino acids and derivatives	氨基酸及其衍生物	Amino acids and derivatives	氨基酸及其衍生物	60-18-4	2	-	-	-	5.89841e+06	5.53355e+06	4.90285e+06	1.24331e+07	1.17883e+07	1.07827e+07	8.11793e+06	1.08036e+07	6.14716e+06	1.01042e+07	7.71712e+06	7.12159e+06	C00082	ko00130,ko00261,ko00350,ko00360,ko00400,ko00460,ko00730,ko00940,ko00950,ko00965,ko00966,ko00970,ko00999,ko01100,ko01110,ko01210,ko01230,ko01240	C00082	-
pme1210	UPLC-MS/MS	150.06	61.01	-	-	149.051	C5H11NO2S	[M+H]+	L-Methionine	L-甲硫氨酸	Amino acids and derivatives	氨基酸及其衍生物	Amino acids and derivatives	氨基酸及其衍生物	63-68-3	2	-	-	-	265474	202482	198155	202383	227984	210194	200575	194495	164960	136561	179428	172147	C00073	ko00270,ko00470,ko00966,ko00970,ko00999,ko01100,ko01110,ko01210,ko01230,ko01240	C00073	-
ML10181668	UPLC-MS/MS	130.09	84.08	-	-	129.079	C6H11NO2	[M+H]+	Cycloleucine	环亮氨酸	Amino acids and derivatives	氨基酸及其衍生物	Amino acids and derivatives	氨基酸及其衍生物	52-52-8	2	-	-	-	1.65244e+07	1.684e+07	1.73881e+07	9.13896e+07	8.79081e+07	9.08152e+07	7.37047e+07	7.57009e+07	7.10371e+07	6.86234e+07	7.72798e+07	7.31017e+07	C03969	-	C03969	-
MWS04559g	UPLC-MS/MS	182.08	136.08	-	-	181.074	C9H11NO3	[M+H]+	3-Hydroxy-L-phenylalanine*	3-羟基-L-苯丙氨酸*	Amino acids and derivatives	氨基酸及其衍生物	Amino acids and derivatives	氨基酸及其衍生物	587-33-7	2	-	-	-	5.51146e+06	5.05947e+06	7.42833e+06	1.19688e+07	1.2774e+07	1.17553e+07	7.86506e+06	9.21513e+06	6.16564e+06	1.02657e+07	7.63144e+06	6.72363e+06	-	-	-	-
MWS04447	UPLC-MS/MS	130.09	70.07	-	-	129.079	C6H11NO2	[M+H]+	Homoproline	高脯氨酸	Amino acids and derivatives	氨基酸及其衍生物	Amino acids and derivatives	氨基酸及其衍生物	56879-46-0	2	-	-	-	2.44002e+07	2.63716e+07	2.89623e+07	2.82664e+07	2.02568e+07	3.09347e+07	1.41724e+08	1.35765e+08	1.47842e+08	6.90293e+07	6.75612e+07	6.75481e+07	-	-	-	-
mws0216	UPLC-MS/MS	132.07	86.06	-	-	131.058	C5H9NO3	[M+H]+	Trans-4-Hydroxy-L-proline	反-4-羟基-L-脯氨酸	Amino acids and derivatives	氨基酸及其衍生物	Amino acids and derivatives	氨基酸及其衍生物	51-35-4	2	-	-	-	5.39409e+06	7.23973e+06	7.35011e+06	2.40817e+07	2.6259e+07	3.14468e+07	3.34534e+07	2.8843e+07	3.01643e+07	2.26154e+07	2.43014e+07	3.03991e+07	C01157	ko00330,ko00470,ko01100,ko02010	C01157	-
pme3827	UPLC-MS/MS	198.08	152.07	-	-	197.069	C9H11NO4	[M+H]+	3,4-Dihydroxy-L-phenylalanine (L-Dopa)	3,4-二羟基-L-苯丙氨酸 (左旋多巴)	Amino acids and derivatives	氨基酸及其衍生物	Amino acids and derivatives	氨基酸及其衍生物	59-92-7	3	-	-	-	1.34206e+06	1.46025e+06	1.1996e+06	691364	709532	695599	1.82693e+06	1.40625e+06	1.75794e+06	993211	1.12993e+06	1.20236e+06	C00355	ko00350,ko00950,ko00965,ko01100,ko01110	C00355	-
pme3388	UPLC-MS/MS	189.13	144.1	-	-	188.127	C7H16N4O2	[M+H]+	Homoarginine	高精氨酸	Amino acids and derivatives	氨基酸及其衍生物	Amino acids and derivatives	氨基酸及其衍生物	156-86-5	3	-	-	-	98021.8	125041	130332	208758	192248	220522	291612	294747	274863	231621	200980	235887	C01924	-	C01924	-
mws0001	UPLC-MS/MS	133.06	74.02	-	-	132.054	C4H8N2O3	[M+H]+	L-Asparagine	L-天冬酰胺	Amino acids and derivatives	氨基酸及其衍生物	Amino acids and derivatives	氨基酸及其衍生物	70-47-3	3	-	-	-	1.19351e+06	1.57895e+06	1.44834e+06	299040	273728	287909	368887	350446	298717	496547	614862	640060	C00152	ko00250,ko00460,ko00970,ko01100,ko01110,ko01230	C00152	-
Hmsp000364	UPLC-MS/MS	144.1	98.09	-	-	143.095	C7H13NO2	[M+H]+	L-Cyclopentylglycine	环戊基甘氨酸	Amino acids and derivatives	氨基酸及其衍生物	Amino acids and derivatives	氨基酸及其衍生物	2521-84-8	2	-	-	-	4.12211e+06	3.9942e+06	4.29353e+06	4.0238e+07	4.02297e+07	4.09928e+07	4.05615e+07	4.08233e+07	3.73073e+07	3.27215e+07	3.79052e+07	3.46979e+07	-	-	-	-
pme0008	UPLC-MS/MS	176.1	113.07	-	-	175.096	C6H13N3O3	[M+H]+	L-Citrulline	L-瓜氨酸	Amino acids and derivatives	氨基酸及其衍生物	Amino acids and derivatives	氨基酸及其衍生物	372-75-8	3	-	-	-	347911	293094	362487	249356	230330	199102	961611	942114	818469	537379	599530	544108	C00327	ko00220,ko01100,ko01110,ko01230	C00327	-
mws0221	UPLC-MS/MS	241.03	151.98	-	-	240.024	C6H12N2O4S2	[M+H]+	L-Cystine	L-胱氨酸	Amino acids and derivatives	氨基酸及其衍生物	Amino acids and derivatives	氨基酸及其衍生物	56-89-3	3	-	-	-	32720.4	18734.6	19317.3	391227	331513	306053	112134	109717	123677	98120.1	93408.1	87520.3	C00491	ko00270,ko01100,ko02010	C00491	-
pme0014	UPLC-MS/MS	148.06	84.04	-	-	147.053	C5H9NO4	[M+H]+	L-Glutamic acid	L-谷氨酸	Amino acids and derivatives	氨基酸及其衍生物	Amino acids and derivatives	氨基酸及其衍生物	56-86-0	3	-	-	-	4.42636e+07	4.49957e+07	4.48033e+07	2.95851e+07	2.70986e+07	2.68426e+07	6.16572e+07	6.15982e+07	5.20965e+07	4.82281e+07	5.11512e+07	5.32091e+07	C00025	ko00220,ko00250,ko00330,ko00332,ko00340,ko00430,ko00470,ko00480,ko00524,ko00630,ko00650,ko00660,ko00860,ko00910,ko00970,ko01100,ko01110,ko01200,ko01210,ko01230,ko01240,ko02010	C00025	-
pme0193	UPLC-MS/MS	147.08	84.04	-	-	146.069	C5H10N2O3	[M+H]+	L-Glutamine	L-谷氨酰胺	Amino acids and derivatives	氨基酸及其衍生物	Amino acids and derivatives	氨基酸及其衍生物	56-85-9	3	-	-	-	6.54675e+07	7.0343e+07	6.89875e+07	6.92973e+07	6.47089e+07	6.11059e+07	1.88929e+07	1.6893e+07	1.52739e+07	4.20386e+07	4.53045e+07	4.70579e+07	C00064	ko00220,ko00230,ko00240,ko00250,ko00470,ko00630,ko00750,ko00910,ko00970,ko01100,ko01230,ko01232,ko01240,ko02010	C00064	-
mws0193	UPLC-MS/MS	190.12	84.08	-	-	189.111	C7H15N3O3	[M+H]+	L-Homocitrulline	L-高瓜氨酸	Amino acids and derivatives	氨基酸及其衍生物	Amino acids and derivatives	氨基酸及其衍生物	1190-49-4	3	-	-	-	338128	355941	322957	246339	261240	269121	503429	559338	611496	334871	375174	354130	C02427	-	C02427	-
mws0671	UPLC-MS/MS	120.07	74.06	-	-	119.058	C4H9NO3	[M+H]+	L-Homoserine	L-高丝氨酸	Amino acids and derivatives	氨基酸及其衍生物	Amino acids and derivatives	氨基酸及其衍生物	672-15-1	3	-	-	-	1.40434e+06	1.61903e+06	1.49549e+06	1.72664e+06	1.70617e+06	1.65539e+06	1.66357e+06	1.6924e+06	1.40835e+06	1.63747e+06	1.73634e+06	1.76604e+06	C00263	ko00260,ko00270,ko00300,ko00920,ko01100,ko01110,ko01230	C00263	-
pme0026	UPLC-MS/MS	147.11	84.08	-	-	146.106	C6H14N2O2	[M+H]+	L-Lysine	L-赖氨酸	Amino acids and derivatives	氨基酸及其衍生物	Amino acids and derivatives	氨基酸及其衍生物	56-87-1	3	-	-	-	6.32727e+07	6.7187e+07	6.76748e+07	6.71187e+07	6.13921e+07	5.69936e+07	1.7644e+07	1.64931e+07	1.47634e+07	4.12314e+07	4.21854e+07	4.27077e+07	C00047	ko00300,ko00310,ko00470,ko00780,ko00960,ko00970,ko01100,ko01110,ko01210,ko01230,ko02010	C00047	-
pme2617	UPLC-MS/MS	166.05	102.06	-	-	165.046	C5H11NO3S	[M+H]+	L-Methionine Sulfoxide	蛋氨酸亚砜	Amino acids and derivatives	氨基酸及其衍生物	Amino acids and derivatives	氨基酸及其衍生物	3226-65-1	3	-	-	-	2.44648e+06	2.59514e+06	2.74817e+06	2.08179e+06	2.19567e+06	2.28428e+06	2.86552e+06	2.79699e+06	2.90103e+06	2.54975e+06	2.72662e+06	2.80533e+06	C02989	ko00270,ko01100	C02989	-
pme0010	UPLC-MS/MS	106.05	70.03	-	-	105.043	C3H7NO3	[M+H]+	L-Serine	L-丝氨酸	Amino acids and derivatives	氨基酸及其衍生物	Amino acids and derivatives	氨基酸及其衍生物	56-45-1	3	-	-	-	215625	215147	213326	176247	185811	196201	399308	369318	355038	298346	350191	339191	C00065	ko00260,ko00261,ko00270,ko00460,ko00470,ko00564,ko00600,ko00630,ko00920,ko00970,ko01100,ko01110,ko01200,ko01230,ko01240,ko02010	C00065	-
mws0256	UPLC-MS/MS	118.09	72.08	-	-	117.079	C5H11NO2	[M+H]+	L-Valine	L-缬氨酸	Amino acids and derivatives	氨基酸及其衍生物	Amino acids and derivatives	氨基酸及其衍生物	72-18-4	3	-	-	-	24917309	2.64422e+07	2.46173e+07	1.7679e+07	1.84181e+07	1.85065e+07	2.2321e+07	2.24182e+07	2.10795e+07	1.75459e+07	2.14042e+07	2.0758e+07	C00183	ko00280,ko00290,ko00460,ko00770,ko00966,ko00970,ko01100,ko01110,ko01210,ko01230,ko01240,ko02010	C00183	-
pmb0034	UPLC-MS/MS	277.1	148.06	-	-	276.096	C10H16N2O7	[M+H]+	L-α-Glutamyl-L-Glutamic Acid	L-谷氨酰-L-谷氨酸	Amino acids and derivatives	氨基酸及其衍生物	Amino acids and derivatives	氨基酸及其衍生物	3929-61-1	3	-	-	-	19464.3	19464.3	19464.3	19464.3	19464.3	19464.3	550106	525312	551149	133469	97321.3	124288	C01425	-	C01425	-
pme0122	UPLC-MS/MS	189.12	126.09	-	-	188.116	C8H16N2O3	[M+H]+	N6-Acetyl-L-lysine	N6-乙酰-L-赖氨酸	Amino acids and derivatives	氨基酸及其衍生物	Amino acids and derivatives	氨基酸及其衍生物	692-04-6	3	-	-	-	598688	1.40354e+06	701640	230432	227961	315341	189578	93334.1	65677.8	191608	311631	253562	C02727	ko00310,ko01100	C02727	-
pme0253	UPLC-MS/MS	174.11	86.1	-	-	173.105	C8H15NO3	[M+H]+	N-Acetyl-L-leucine	N-乙酰-L-亮氨酸	Amino acids and derivatives	氨基酸及其衍生物	Amino acids and derivatives	氨基酸及其衍生物	1188-21-2	3	-	-	-	78090	90304.1	68471.2	237663	177035	143843	157826	163620	63943.8	105735	152451	100815	C02710	-	C02710	-
pme1228	UPLC-MS/MS	221.09	204.07	-	-	220.085	C11H12N2O3	[M+H]+	5-Hydroxy-L-tryptophan	5-羟基-L-色氨酸	Amino acids and derivatives	氨基酸及其衍生物	Amino acids and derivatives	氨基酸及其衍生物	4350-09-8	3	-	-	-	9340.21	9340.21	9340.21	294856	383113	358698	46701	63154.2	58669.7	107761	100840	117417	C00643	ko00380,ko01100	C00643	-
Zmjp000182	UPLC-MS/MS	189.13	70.07	-	-	188.127	C7H16N4O2	[M+H]+	N-Monomethyl-L-arginine*	N-单甲基-L-精氨酸*	Amino acids and derivatives	氨基酸及其衍生物	Amino acids and derivatives	氨基酸及其衍生物	17035-90-4	3	-	-	-	207202	206708	192162	437723	457878	489389	631903	761126	605456	528379	356760	571462	C03884	-	C03884	-
mws1050	UPLC-MS/MS	148.06	88.04	-	-	147.053	C5H9NO4	[M+H]+	O-Acetylserine	O-乙酰丝氨酸	Amino acids and derivatives	氨基酸及其衍生物	Amino acids and derivatives	氨基酸及其衍生物	5147-00-2	3	-	-	-	381855	405532	410342	163632	197579	144462	605650	481976	521295	365759	338083	352195	C00979	ko00270,ko00908,ko00920,ko01100,ko01110,ko01200,ko01230,ko04122	C00979	-
mws0582	UPLC-MS/MS	322.11	130.05	-	-	321.099	C11H19N3O6S	[M+H]+	S-(Methyl)glutathione	S-甲基谷胱甘肽	Amino acids and derivatives	氨基酸及其衍生物	Amino acids and derivatives	氨基酸及其衍生物	2922-56-7	3	-	-	-	631303	659697	437385	120126	129286	117692	122037	105957	143812	158361	280677	266371	C11347	-	C11347	-
Zmdp000972	UPLC-MS/MS	136.04	91.05	-	-	135.035	C4H9NO2S	[M+H]+	S-Methyl-L-cysteine	S-甲基-L-半胱氨酸	Amino acids and derivatives	氨基酸及其衍生物	Amino acids and derivatives	氨基酸及其衍生物	1187-84-4	3	-	-	-	204162	178219	167122	614159	524252	501549	366442	323407	260449	269557	330709	320382	C22040	ko02010	C22040	-
Zbqp002380	UPLC-MS/MS	295.16	136.08	-	-	294.158	C15H22N2O4	[M+H]+	Tyrosylleucine	酪氨酸-亮氨酸	Amino acids and derivatives	氨基酸及其衍生物	Amino acids and derivatives	氨基酸及其衍生物	17355-10-1	2	-	-	-	16924.7	16924.7	16924.7	167662	151202	151181	113732	145512	118307	122233	104172	84623.5	-	-	-	-
mws3133	UPLC-MS/MS	174.08	86.06	-	-	173.069	C7H11NO4	[M+H]+	Oxaceprol	N-乙酰-L-4-羟基脯氨酸	Amino acids and derivatives	氨基酸及其衍生物	Amino acids and derivatives	氨基酸及其衍生物	33996-33-7	2	-	-	-	282598	278308	291234	176457	174601	186942	1.61978e+06	1.89713e+06	1.51827e+06	570181	707101	724513	-	-	-	-
Lmqp000427	UPLC-MS/MS	146.08	82.07	-	-	145.074	C6H11NO3	[M+H]+	N-Methyl-Trans-4-Hydroxy-L-Proline	N-甲基-反式-4-羟基-L-脯氨酸	Amino acids and derivatives	氨基酸及其衍生物	Amino acids and derivatives	氨基酸及其衍生物	4252-82-8	2	-	-	-	1.67629e+06	1.46732e+06	1.43495e+06	9.97362e+06	9.36511e+06	9.47521e+06	7.78634e+06	7.50336e+06	6.92719e+06	6.73841e+06	8.2634e+06	6.79045e+06	-	-	-	-
MWS04412	UPLC-MS/MS	175.12	70.07	-	-	174.137	C8H18N2O2	[M+H]+	N(6),N(6)-Dimethyl-L-lysine	N(6),N(6)-二甲基-L-赖氨酸	Amino acids and derivatives	氨基酸及其衍生物	Amino acids and derivatives	氨基酸及其衍生物	2259-86-1	2	-	-	-	6.12292e+06	7.207e+06	6.80253e+06	2.59838e+07	2.56122e+07	2.58823e+07	3.11922e+07	3.29134e+07	2.77649e+07	2.12864e+07	2.43551e+07	2.46692e+07	-	-	-	-
pme0170	UPLC-MS/MS	217.13	158.08	-	-	216.122	C8H16N4O3	[M+H]+	N-Acetyl-L-Arginine	N-乙酰-L-精氨酸	Amino acids and derivatives	氨基酸及其衍生物	Amino acids and derivatives	氨基酸及其衍生物	155-84-0	2	-	-	-	416716	417431	257431	338290	337511	335716	1.61474e+06	1.42636e+06	1.53008e+06	740613	893465	763001	-	-	-	-
Lmhp001461	UPLC-MS/MS	229.15	70.07	-	-	228.147	C11H20N2O3	[M+H]+	L-Prolyl-L-Leucine	L-脯氨酰-L-亮氨酸	Amino acids and derivatives	氨基酸及其衍生物	Amino acids and derivatives	氨基酸及其衍生物	52899-07-7	2	-	-	-	349641	386932	380930	135248	165086	144919	259460	256959	239993	227101	256934	266206	-	-	-	-
Zbqp002364	UPLC-MS/MS	146.12	100.11	-	-	145.11	C7H15NO2	[M+H]+	N,N-Dimethyl-L-Valine	N-N-二甲基-L-乙烯	Amino acids and derivatives	氨基酸及其衍生物	Amino acids and derivatives	氨基酸及其衍生物	2812-32-0	2	-	-	-	115859	126105	130981	146095	140083	152391	197614	202209	172596	147572	134130	163723	-	-	-	-
MWS00204g	UPLC-MS/MS	104.07	58.07	-	-	103.063	C4H9NO2	[M+H]+	N-Ethylglycine	N-乙基甘氨酸	Amino acids and derivatives	氨基酸及其衍生物	Amino acids and derivatives	氨基酸及其衍生物	627-01-0	2	-	-	-	8.11925e+06	9.74014e+06	8.70019e+06	3.25345e+06	3.53842e+06	3.05454e+06	8.56682e+06	7.72832e+06	8.77012e+06	5.74722e+06	5.31535e+06	5.8774e+06	-	-	-	-
MWSmce585	UPLC-MS/MS	104.07	59.01	-	-	103.063	C4H9NO2	[M+H]+	Methyl 3-aminopropanoate	3-氨基丙酸甲酯	Amino acids and derivatives	氨基酸及其衍生物	Amino acids and derivatives	氨基酸及其衍生物	4138-35-6	2	-	-	-	8.17581e+06	1.02978e+07	8.87195e+06	3.64839e+06	3.68012e+06	3.13642e+06	9.17992e+06	8.05685e+06	9.05839e+06	5.87839e+06	5.75128e+06	5.86264e+06	-	-	-	-
MWSmce190	UPLC-MS/MS	148.09	74.02	-	-	147.089	C6H13NO3	[M+H]+	4-Hydroxy-L-Isoleucine	4-羟基-L-异亮氨酸	Amino acids and derivatives	氨基酸及其衍生物	Amino acids and derivatives	氨基酸及其衍生物	781658-23-9	3	-	-	-	174387	181255	168144	116869	108845	123748	235376	242773	246107	191893	212476	198099	-	-	-	-
MWSmce706	UPLC-MS/MS	129.07	56.05	-	-	128.059	C5H8N2O2	[M+H]+	Cyclo(Ala-Gly)	环(甘氨酰-L-丙氨酰)	Amino acids and derivatives	氨基酸及其衍生物	Amino acids and derivatives	氨基酸及其衍生物	4526-77-6	3	-	-	-	1.33488e+06	1.57529e+06	980400	305939	594166	571727	1.10877e+06	1.02827e+06	839855	753879	1.10626e+06	1.04966e+06	-	-	-	-
MWStz083	UPLC-MS/MS	197.13	70.07	-	-	196.121	C10H16N2O2	[M+H]+	Cyclo(D-Val-L-Pro)	环(D-缬氨酸-L-脯氨酸)	Amino acids and derivatives	氨基酸及其衍生物	Amino acids and derivatives	氨基酸及其衍生物	27483-18-7	3	-	-	-	29290.4	5858.09	5858.09	5858.09	5858.09	5858.09	155845	106252	121439	51612.8	43509.8	66779.1	-	-	-	-
Zmgn002106	UPLC-MS/MS	206.08	58.03	-	-	207.089	C11H13NO3	[M-H]-	N-Acetyl-L-phenylalanine	N-乙酰-L-苯丙氨酸	Amino acids and derivatives	氨基酸及其衍生物	Amino acids and derivatives	氨基酸及其衍生物	2018-61-3	1	-	-	-	145904	182089	157578	419025	394514	429038	609740	569670	547414	357215	347878	391009	C03519	ko00360,ko01100	C03519	-
mws4176	UPLC-MS/MS	237.12	120.09	-	-	236.116	C12H16N2O3	[M+H]+	L-Alanyl-L-Phenylalanine	L-丙氨酰-L-苯丙氨酸	Amino acids and derivatives	氨基酸及其衍生物	Amino acids and derivatives	氨基酸及其衍生物	3061-90-3	3	-	-	-	119957	113334	105651	7815.13	7815.13	7815.13	76181.8	39733.4	44191	39075.7	69028.4	56358.9	-	-	-	-
mws0629	UPLC-MS/MS	281.11	166.09	-	-	280.106	C13H16N2O5	[M+H]+	L-Aspartyl-L-Phenylalanine	L-天冬氨酰-L-苯丙氨酸	Amino acids and derivatives	氨基酸及其衍生物	Amino acids and derivatives	氨基酸及其衍生物	13433-09-5	3	-	-	-	354392	391386	359703	335014	400697	356213	151310	131323	103454	200773	255061	228675	-	-	-	-
Lmhp001732	UPLC-MS/MS	263.14	70.06	-	-	262.132	C14H18N2O3	[M+H]+	L-Prolyl-L-Phenylalanine	L-脯氨酰-L-苯丙氨酸	Amino acids and derivatives	氨基酸及其衍生物	Amino acids and derivatives	氨基酸及其衍生物	13589-02-1	3	-	-	-	28230.2	28230.2	28230.2	28230.2	28230.2	28230.2	414528	339267	402362	141151	157610	151352	-	-	-	-
Lmhp001670	UPLC-MS/MS	231.17	72.08	-	-	230.163	C11H22N2O3	[M+H]+	L-Valyl-L-Leucine	L-缬氨酰-L-亮氨酸	Amino acids and derivatives	氨基酸及其衍生物	Amino acids and derivatives	氨基酸及其衍生物	3989-97-7	3	-	-	-	297749	315463	304895	86292.1	89759.5	110947	74402	78361.6	64689	112589	127117	136899	-	-	-	-
Lmhp002001	UPLC-MS/MS	265.15	72.08	-	-	264.147	C14H20N2O3	[M+H]+	L-Valyl-L-Phenylalanine	L-缬氨酰-L-苯丙氨酸	Amino acids and derivatives	氨基酸及其衍生物	Amino acids and derivatives	氨基酸及其衍生物	3918-92-1	3	-	-	-	87957.8	116445	113125	44413.1	38907.4	58653.7	114793	81692.2	136479	84626.4	96356.2	78654.6	-	-	-	-
MWS4296	UPLC-MS/MS	223.11	120.08	-	-	222.1	C11H14N2O3	[M+H]+	Glycylphenylalanine	甘氨酰苯基丙氨酸	Amino acids and derivatives	氨基酸及其衍生物	Amino acids and derivatives	氨基酸及其衍生物	3321-03-7	3	-	-	-	163940	169829	161005	139241	138769	114965	86047.9	89935.9	61277.7	94370.8	128760	126154	-	-	-	-
mws0520	UPLC-MS/MS	224.09	136.08	-	-	223.084	C11H13NO4	[M+H]+	N-Acetyl-L-tyrosine	N-乙酰-L-酪氨酸	Amino acids and derivatives	氨基酸及其衍生物	Amino acids and derivatives	氨基酸及其衍生物	537-55-3	3	-	-	-	8273.48	8273.48	8273.48	8273.48	8273.48	8273.48	94118	90072.6	112778	41367.4	42280.1	61832.2	-	-	-	-
Zmdp001857	UPLC-MS/MS	311.12	165.05	-	-	310.116	C14H18N2O6	[M+H]+	γ-Glutamyltyrosine	γ-谷氨酰胺酪氨酸	Amino acids and derivatives	氨基酸及其衍生物	Amino acids and derivatives	氨基酸及其衍生物	7432-23-7	3	-	-	-	189829	185134	178791	129971	140578	116916	120423	120270	90206.1	117275	131545	135262	-	-	-	-
pme3033	UPLC-MS/MS	104.071	86	-	-	103.063	C4H9NO2	[M+H]+	N,N-Dimethylglycine	N,N-二甲基甘氨酸	Amino acids and derivatives	氨基酸及其衍生物	Amino acids and derivatives	氨基酸及其衍生物	1118-68-9	3	-	-	-	7.47221e+06	7.69983e+06	8.76447e+06	2.89644e+06	3.3028e+06	2.97679e+06	1.54707e+06	1.56277e+06	1.47173e+06	3.27899e+06	3.40373e+06	3.18545e+06	C01026	ko00260,ko01100	C01026	-
pme0006	UPLC-MS/MS	116.071	70.1	-	-	115.063	C5H9NO2	[M+H]+	L-Proline	L-脯氨酸	Amino acids and derivatives	氨基酸及其衍生物	Amino acids and derivatives	氨基酸及其衍生物	147-85-3	3	-	-	-	4.75012e+06	4.08165e+06	4.32934e+06	9.02202e+06	9.27108e+06	9.34656e+06	4.44116e+06	4.7705e+06	4.20162e+06	6.27767e+06	6.39292e+06	6.00275e+06	C00148	ko00330,ko00332,ko00470,ko00970,ko01100,ko01110,ko01230,ko02010	C00148	-
pmf0470	UPLC-MS/MS	132.065	73	-	-	131.058	C5H9NO3	[M+H]+	cis-4-Hydroxy-D-proline	顺式-4-羟基-D-脯氨酸	Amino acids and derivatives	氨基酸及其衍生物	Amino acids and derivatives	氨基酸及其衍生物	2584-71-6	3	-	-	-	114997	134468	123445	157039	87151.7	111458	919733	901325	952396	440012	418457	514430	C03440	ko00470,ko01100	C03440	-
mws0258	UPLC-MS/MS	132.102	86	-	-	131.095	C6H13NO2	[M+H]+	L-Isoleucine*	L-异亮氨酸*	Amino acids and derivatives	氨基酸及其衍生物	Amino acids and derivatives	氨基酸及其衍生物	73-32-5	1	-	-	-	6.3606e+07	6.66727e+07	6.08362e+07	1.10959e+08	1.02668e+08	1.14527e+08	7.69087e+07	8.18706e+07	7.21827e+07	7.52221e+07	8.48278e+07	8.01743e+07	C00407	ko00280,ko00290,ko00460,ko00960,ko00966,ko00970,ko01100,ko01110,ko01210,ko01230,ko02010	C00407	-
Rfmb318	UPLC-MS/MS	144.102	84.0813	-	-	144.092	C7H14NO2+	[M]+	D-Proline betaine	脯氨酸甜菜碱	Amino acids and derivatives	氨基酸及其衍生物	Amino acids and derivatives	氨基酸及其衍生物	1195-94-4	3	-	-	-	3.0535e+06	3.33542e+06	3.46749e+06	3.45551e+07	3.51401e+07	3.50125e+07	3.1846e+07	3.12376e+07	2.9245e+07	2.7937e+07	2.74799e+07	2.84839e+07	C21514	-	C21514	-
Zbqn001255	UPLC-MS/MS	130.09	88.04	-	-	131.095	C6H13NO2	[M-H]-	propyl-L-alanine	丙基-L-丙氨酸	Amino acids and derivatives	氨基酸及其衍生物	Amino acids and derivatives	氨基酸及其衍生物	-	1	-	-	-	107529	147888	147066	223159	273083	283770	99266.7	98958.2	121166	171334	147747	150229	-	-	-	-
Zmzn000113	UPLC-MS/MS	146.05	102.06	-	-	147.053	C5H9NO4	[M-H]-	L-threo-3-Methylaspartate	L-苏式-3-甲基天冬氨酸	Amino acids and derivatives	氨基酸及其衍生物	Amino acids and derivatives	氨基酸及其衍生物	6061-13-8	1	-	-	-	512978	536087	568361	520649	446454	437348	1.65128e+06	1.52834e+06	1.52754e+06	889268	903532	840415	C03618	ko00630,ko00660,ko01100,ko01200	C03618	-
pme2914	UPLC-MS/MS	161.05	99.05	-	-	162.053	C6H10O5	[M-H]-	3-Hydroxy-3-methylpentane-1,5-dioic acid	3-羟基-3-甲基谷氨酸	Amino acids and derivatives	氨基酸及其衍生物	Amino acids and derivatives	氨基酸及其衍生物	503-49-1	1	-	-	-	6.99234e+07	6.8247e+07	7.56203e+07	5.07911e+07	4.75082e+07	5.57281e+07	9.3495e+07	9.60227e+07	9.86141e+07	7.03998e+07	7.76808e+07	6.95795e+07	C03761	-	C03761	-
Zbqn004234	UPLC-MS/MS	250.07	164.07	-	-	251.079	C12H13NO5	[M-H]-	N-(malonyl)phenylalanine	N-(丙二酰基)苯丙氨酸	Amino acids and derivatives	氨基酸及其衍生物	Amino acids and derivatives	氨基酸及其衍生物	-	1	-	-	-	44364	67708.5	64207	137735	137653	193541	229681	211297	155243	116743	128418	136569	-	-	-	-
pmb2591	UPLC-MS/MS	245.09	203.08	-	-	246.1	C13H14N2O3	[M-H]-	N-Acetyl-L-Tryptophan	N-乙酰-L-色氨酸	Amino acids and derivatives	氨基酸及其衍生物	Amino acids and derivatives	氨基酸及其衍生物	1218-34-4	1	-	-	-	19504.8	32698.2	23029.3	583564	657011	677568	419362	460684	363802	407231	430912	273445	-	-	-	-
Wayn002636	UPLC-MS/MS	365.13	203.08	-	-	366.142	C17H22N2O7	[M-H]-	N-(1-Deoxy-1-fructosyl)Tryptophan	N-(1-脱氧-1-果糖基)色氨酸	Amino acids and derivatives	氨基酸及其衍生物	Amino acids and derivatives	氨基酸及其衍生物	-	2	-	-	-	94032.3	119373	143898	477438	478362	581927	535793	595108	673257	337374	391224	363357	-	-	-	-
Zbqn000412	UPLC-MS/MS	160.06	88.04	-	-	161.069	C6H11NO4	[M-H]-	N-alanicacidalkyl-alanine	N-丙酸烷基丙氨酸	Amino acids and derivatives	氨基酸及其衍生物	Amino acids and derivatives	氨基酸及其衍生物	-	2	-	-	-	6613.64	6613.64	6613.64	47106.3	33068.2	66892.9	213685	191109	175475	76897.3	59212.1	47206.8	-	-	-	-
pmb2855	UPLC-MS/MS	307.11	145.06	-	-	308.122	C11H20N2O8	[M-H]-	L-Glutamine-O-glycoside	L-谷氨酰胺-O-葡萄糖苷	Amino acids and derivatives	氨基酸及其衍生物	Amino acids and derivatives	氨基酸及其衍生物	-	3	-	-	-	255686	427886	480560	130548	215186	143336	239290	207358	152498	392510	330560	474376	-	-	-	-
Zmgn001039	UPLC-MS/MS	266.09	134.05	-	-	267.078	C9H17NO6S	[M-H]-	S-Ribosyl-L-homocysteine	S-核糖基-L-高半胱氨酸	Amino acids and derivatives	氨基酸及其衍生物	Amino acids and derivatives	氨基酸及其衍生物	-	2	-	-	-	316281	413259	554726	202507	230700	196046	618337	543365	554026	457854	378280	449859	C03539	ko00270,ko01100,ko01230	C03539	-
pme0075	UPLC-MS/MS	188.06	128.04	-	-	189.064	C7H11NO5	[M-H]-	N-Acetyl-L-glutamic acid	N-乙酰-L-谷氨酸	Amino acids and derivatives	氨基酸及其衍生物	Amino acids and derivatives	氨基酸及其衍生物	1188-37-0	2	-	-	-	131920	155411	134389	155017	157694	162088	796996	1.09176e+06	1.04051e+06	491608	544913	493622	C00624	ko00220,ko00470,ko01100,ko01110,ko01210,ko01230	C00624	-
Wmsn000960	UPLC-MS/MS	785.25	353.09	-	-	786.258	C35H46O20	[M-H]-	Teupolioside	Teupolioside	Amino acids and derivatives	氨基酸及其衍生物	Amino acids and derivatives	氨基酸及其衍生物	143617-02-1	2	-	-	-	9831.68	35970.1	15059.1	116474	125296	204391	567656	558929	572633	878261	681869	547074	-	-	-	-
pme2758	UPLC-MS/MS	162.04	144.03	-	-	163.048	C5H9NO5	[M-H]-	4-Hydroxy-L-glutamic acid	4-羟基-L-谷氨酸	Amino acids and derivatives	氨基酸及其衍生物	Amino acids and derivatives	氨基酸及其衍生物	3913-68-6	3	-	-	-	33455.5	42341.8	26178.5	27088.5	48212.9	33641.7	5235.71	29268.4	5235.71	59892.1	76691.1	78234.5	C03079	-	C03079	-
pme2074	UPLC-MS/MS	322.2	130.05	-	-	323.21	C18H29NO4	[M-H]-	Jasmonoyl-L-Isoleucine	茉莉酰-L-异亮氨酸	Amino acids and derivatives	氨基酸及其衍生物	Amino acids and derivatives	氨基酸及其衍生物	120330-93-0	3	-	-	-	939840	1.15227e+06	852647	1.41426e+06	1.4522e+06	1.28183e+06	1.23316e+06	1.16455e+06	1.24333e+06	1.09172e+06	1.1393e+06	911402	C18699	ko04075	C18699	-
pme2559	UPLC-MS/MS	174.04	88.04	-	-	175.048	C6H9NO5	[M-H]-	N-Acetyl-L-Aspartic Acid	N-乙酰-L-天冬氨酸	Amino acids and derivatives	氨基酸及其衍生物	Amino acids and derivatives	氨基酸及其衍生物	997-55-7	3	-	-	-	120498	83142.5	92439	224989	216425	247628	75108.2	122667	115408	142441	168047	118228	C01042	ko00250,ko01100	C01042	-
Zmyn000155	UPLC-MS/MS	173.11	131.08	-	-	174.1	C7H14N2O3	[M-H]-	N-α-Acetyl-L-ornithine	N-α-乙酰基-L-鸟氨酸	Amino acids and derivatives	氨基酸及其衍生物	Amino acids and derivatives	氨基酸及其衍生物	6205-08-9	3	-	-	-	58545.7	54776.7	50834.3	368197	441707	440390	313319	318865	337791	298695	314165	318192	C00437	ko00220,ko01100,ko01110,ko01210,ko01230	C00437	-
MWS0132	UPLC-MS/MS	611.15	306.07	-	-	612.152	C20H32N6O12S2	[M-H]-	Oxiglutatione	氧化谷胱甘肽	Amino acids and derivatives	氨基酸及其衍生物	Amino acids and derivatives	氨基酸及其衍生物	27025-41-8	3	-	-	-	13119.7	20847.3	28681.5	12379.4	7867.96	7954.47	63860.5	113720	95372.4	44960.4	51198.7	38975.5	C00127	ko00480,ko01100,ko01240	C00127	-
pme0137	UPLC-MS/MS	187.07	125.07	-	-	188.08	C7H12N2O4	[M-H]-	N-Acetyl-L-Glutamine	N-乙酰-L-谷氨酰胺	Amino acids and derivatives	氨基酸及其衍生物	Amino acids and derivatives	氨基酸及其衍生物	2490-97-3	3	-	-	-	904685	745751	941567	610062	538773	753784	406380	404772	364055	672885	669161	626952	-	-	-	-
pme3193	UPLC-MS/MS	116.04	74.02	-	-	117.043	C4H7NO3	[M-H]-	N-Acetyl-L-glycine	N-乙酰-L-甘氨酸	Amino acids and derivatives	氨基酸及其衍生物	Amino acids and derivatives	氨基酸及其衍生物	543-24-8	3	-	-	-	34517.2	43245.5	64334.3	191492	188508	251610	270483	333351	383553	229011	278083	271077	-	-	-	-
pme3382	UPLC-MS/MS	160.06	98.02	-	-	161.069	C6H11NO4	[M-H]-	N-Acetyl-L-threonine	N-乙酰-L-苏氨酸	Amino acids and derivatives	氨基酸及其衍生物	Amino acids and derivatives	氨基酸及其衍生物	17093-74-2	3	-	-	-	75669.5	68877.1	84471.4	213028	175212	207249	298230	267976	317412	285699	275674	223862	-	-	-	-
pme3351	UPLC-MS/MS	144.067	126.056	-	-	145.074	C6H11NO3	[M-H]-	Allysine(6-Oxo DL-Norleucine)	醛赖氨酸	Amino acids and derivatives	氨基酸及其衍生物	Amino acids and derivatives	氨基酸及其衍生物	1962-83-0	3	-	-	-	200936	211673	226742	55395.1	90161.6	88027.5	589358	585290	453644	339156	282632	267606	C04076	ko00300,ko00310,ko00960,ko01100,ko01110,ko01230	C04076	-
MWS00353g	UPLC-MS/MS	178.088	86.0245	-	-	179.095	C10H13NO2	[M-H]-	α-Methyl-DL-Phenylalanine	α-甲基-DL-苯丙氨酸	Amino acids and derivatives	氨基酸及其衍生物	Amino acids and derivatives	氨基酸及其衍生物	1132-26-9	3	-	-	-	1662.45	1662.45	1662.45	21184.6	8312.23	17014.9	72452	54657.6	58123.3	33480.6	30641	29942.7	-	-	-	-
Zbqn003748	UPLC-MS/MS	216.088	130.086	-	-	217.095	C9H15NO5	[M-H]-	N-malonylleucine	N-丙二酰亮氨酸	Amino acids and derivatives	氨基酸及其衍生物	Amino acids and derivatives	氨基酸及其衍生物	-	3	-	-	-	94560.6	130166	150178	279238	265859	305806	126173	93440	104572	144619	164638	135716	-	-	-	-
Zbqn002456	UPLC-MS/MS	266.066	88.0401	-	-	267.074	C12H13NO6	[M-H]-	N-(3,4,5-trihydroxycinnamicacid)-alanine	N-(3,4,5-三羟基肉桂酸)-丙氨酸	Amino acids and derivatives	氨基酸及其衍生物	Amino acids and derivatives	氨基酸及其衍生物	-	3	-	-	-	2750.63	13775.8	11019.5	21087.6	25670.2	21445.4	36146.1	63565.2	46776.5	31165.3	17440.6	28416.6	-	-	-	-
ZbWn002006	UPLC-MS/MS	158.082	116.078	-	-	159.089	C7H13NO3	[M-H]-	N-Acetyl-L-valine	N-乙酰-L-缬氨酸	Amino acids and derivatives	氨基酸及其衍生物	Amino acids and derivatives	氨基酸及其衍生物	96-81-1	3	-	-	-	219242	219245	194699	605793	719492	768182	180774	214696	215602	344776	395205	365360	-	-	-	-
Zmdn001564	UPLC-MS/MS	293.115	164.072	-	-	294.122	C14H18N2O5	[M-H]-	γ-Glu-Phe	γ-谷氨酰-苯丙氨酸	Amino acids and derivatives	氨基酸及其衍生物	Amino acids and derivatives	氨基酸及其衍生物	7432-24-8	3	-	-	-	135019	163005	239164	80061.4	63657.6	98317.9	54182.9	46977	34514.6	100312	81480.2	84871.9	-	-	-	-
Zbqn003921	UPLC-MS/MS	250.073	88.0441	-	-	251.079	C12H13NO5	[M-H]-	N-carboxy-N-(2-oxo-2-phenylethyl)-L-alanine	N-羧基-N-(2-氧代-2-苯乙基)-L-丙氨酸	Amino acids and derivatives	氨基酸及其衍生物	Amino acids and derivatives	氨基酸及其衍生物	-	3	-	-	-	214737	245081	264921	30347.9	37355.7	28018.5	28662.9	25690.5	11682.8	95717	116713	99207.8	-	-	-	-
Zbqn004682	UPLC-MS/MS	289.083	203.081	-	-	290.09	C14H14N2O5	[M-H]-	N-(malonyl)tryptophan	N-(丙二酰基)色氨酸	Amino acids and derivatives	氨基酸及其衍生物	Amino acids and derivatives	氨基酸及其衍生物	-	3	-	-	-	4762.09	23810.5	4762.09	138574	148303	122778	110565	82933.5	75798.2	81448.2	71723	76587.4	-	-	-	-
Wayn001257	UPLC-MS/MS	292.138	130.087	-	-	293.147	C12H23NO7	[M-H]-	N-(1-Deoxy-1-fructosyl)Leucine	N-(1-脱氧-1-果糖基)亮氨酸	Amino acids and derivatives	氨基酸及其衍生物	Amino acids and derivatives	氨基酸及其衍生物	-	3	-	-	-	56878.9	62462.6	91947	124847	130465	134824	11375.8	11375.8	11375.8	72643.8	61985.2	106304	-	-	-	-
mws0227	UPLC-MS/MS	132.1	86.1	-	-	131.095	C6H13NO2	[M+H]+	L-Leucine*	L-亮氨酸*	Amino acids and derivatives	氨基酸及其衍生物	Amino acids and derivatives	氨基酸及其衍生物	61-90-5	1	-	-	-	6.04455e+07	6.08441e+07	5.92382e+07	9.90207e+07	100913989	1.03231e+08	7.45487e+07	7.7001e+07	6.66886e+07	7.05098e+07	7.83951e+07	7.37138e+07	C00123	ko00280,ko00290,ko00966,ko00970,ko01100,ko01110,ko01210,ko01230,ko02010	C00123	-
MWS5164	UPLC-MS/MS	203.15	70.07	-	-	202.143	C8H18N4O2	[M+H]+	N,N'-Dimethylarginine;SDMA	N,N'-二甲基精氨酸	Amino acids and derivatives	氨基酸及其衍生物	Amino acids and derivatives	氨基酸及其衍生物	30344-00-4	3	-	-	-	331404	531436	505756	194601	214445	214416	383659	379973	383272	336830	229690	220257	-	-	-	-
Lmrgn03385	UPLC-MS/MS	281.14	237.15	-	-	282.147	C15H22O5	[M-H]-	Dihydrophaseic acid	二氢红花菜豆酸	Terpenoids	萜类	Sesquiterpenoids	倍半萜	41756-77-8	2	-	-	-	120754	146469	149820	538887	605967	647332	312165	260505	304107	306344	362296	281746	C15971	ko00906	C15971	-
Smsp010767	UPLC-MS/MS	235.17	147.08	-	-	234.162	C15H22O2	[M+H]+	Confertifoline	密叶辛木素	Terpenoids	萜类	Sesquiterpenoids	倍半萜	1811-23-0	2	-	-	-	80471.1	76530.7	81908	122733	141350	126287	655856	761036	633413	322444	264441	285820	C09376	-	C09376	-
Qmyp101120	UPLC-MS/MS	235.17	133.1	-	-	234.162	C15H22O2	[M+H]+	Procurcumenol	原莪术醇	Terpenoids	萜类	Sesquiterpenoids	倍半萜	-	3	-	-	-	241386	269526	224181	687141	724016	776799	5.95053e+06	6.13054e+06	5.69718e+06	2.82591e+06	2.79596e+06	2.58285e+06	-	-	-	-
Qmxn082004	UPLC-MS/MS	375.22	315.2	-	-	376.225	C22H32O5	[M-H]-	Excisusin A	Excisusin A	Terpenoids	萜类	Ditepenoids	二萜	-	2	-	-	-	51129.6	60298.3	38264	62759.5	62375.1	71385.6	286684	298312	311935	87672.6	118805	105324	-	-	-	-
Lazp008642	UPLC-MS/MS	237.18	121.1	-	-	236.177	C15H24O2	[M+H]+	1,4-Peroxyaurol-ene*	1,4-Peroxyaurol-ene*	Terpenoids	萜类	Sesquiterpenoids	倍半萜	-	2	-	-	-	4.95046e+06	4.98227e+06	4.76943e+06	15038064	1.75075e+07	1.67668e+07	4.61631e+07	4.58786e+07	4.75783e+07	2.68398e+07	2.50498e+07	2.51481e+07	-	-	-	-
Lmgp009053	UPLC-MS/MS	235.17	175.15	-	-	234.162	C15H22O2	[M+H]+	2β-Methoxy-14-nor-β-patchoulane-1(5)-ene-4-one	2β-甲氧基-14-降-β-广藿香烷-1(5)-烯-4-酮	Terpenoids	萜类	Sesquiterpenoids	倍半萜	-	2	-	-	-	74210.6	69801.8	70620.8	398564	463620	519481	3.66638e+06	3.79813e+06	3.65609e+06	1.69865e+06	1.73586e+06	1.69038e+06	-	-	-	-
Lmgp008852	UPLC-MS/MS	239.2	147.12	-	-	238.193	C15H26O2	[M+H]+	3-Hydroxypatchoulol	3-羟基广藿香醇	Terpenoids	萜类	Sesquiterpenoids	倍半萜	-	2	-	-	-	24213.2	24213.2	24213.2	185053	231337	250892	126518	388479	121066	216595	204121	203843	-	-	-	-
Lmmp102001	UPLC-MS/MS	219.17	159.12	-	-	218.167	C15H22O	[M+H]+	1-Cis-5-cis-germacrone	1-顺-5-顺-大牻牛儿酮	Terpenoids	萜类	Sesquiterpenoids	倍半萜	-	2	-	-	-	81765.1	81765.1	81765.1	408826	425777	419491	3.68312e+06	3.82829e+06	3.56859e+06	1.50415e+06	1.53656e+06	1.58046e+06	-	-	-	-
Lmgp008093	UPLC-MS/MS	235.17	199.15	-	-	234.162	C15H22O2	[M+H]+	2-Keto-1(5)-β-patchoulene-4β-ol	2-酮基-1(5)-β-广藿香烯-4β-醇	Terpenoids	萜类	Sesquiterpenoids	倍半萜	-	2	-	-	-	146412	136251	121446	532966	547579	585936	5.90249e+06	5.55234e+06	6.62382e+06	2.59776e+06	2.73061e+06	2.57327e+06	-	-	-	-
Lmgp009434	UPLC-MS/MS	237.19	121.1	-	-	236.178	C15H24O2	[M+H]+	10α-Hydroperoxy-guaia-1,11-diene*	10α-过氧氢基-愈创木烷-1,11-二烯*	Terpenoids	萜类	Sesquiterpenoids	倍半萜	-	2	-	-	-	4.79769e+06	5.2532e+06	4.60112e+06	1.6657e+07	1.9464e+07	1.88465e+07	5.31774e+07	5.62172e+07	5.79354e+07	2.97692e+07	3.04047e+07	3.03905e+07	-	-	-	-
MWSmce679	UPLC-MS/MS	221.19	147.12	-	-	220.183	C15H24O	[M+H]+	Caryophyllene oxide	氧化石竹烯	Terpenoids	萜类	Sesquiterpenoids	倍半萜	1139-30-6	2	-	-	-	134018	116690	152362	324750	332440	379714	1.4796e+06	1.58926e+06	1.35077e+06	668518	797786	718637	C16908	-	C16908	-
MWSmce591	UPLC-MS/MS	235.17	105.07	-	-	234.162	C15H22O2	[M+H]+	Curcumenol*	莪术烯醇*	Terpenoids	萜类	Sesquiterpenoids	倍半萜	19431-84-6	2	-	-	-	430207	427653	417633	829345	953039	918944	6.3679e+06	6.45901e+06	6.62135e+06	3.21217e+06	2.89151e+06	3.14353e+06	C16942	-	C16942	-
Lmgp008851	UPLC-MS/MS	237.18	135.12	-	-	236.178	C15H24O2	[M+H]+	Corymbolone	5-羟基-11-桉叶烷烯-1-酮	Terpenoids	萜类	Sesquiterpenoids	倍半萜	97094-19-4	2	-	-	-	80240.1	127057	128616	317501	284592	294256	1.26854e+06	1.35142e+06	1.37413e+06	782524	684773	798654	-	-	-	-
Wbmp005366	UPLC-MS/MS	221.19	135.12	-	-	220.183	C15H24O	[M+H]+	Humulene epoxide II	环氧化蛇麻烯II	Terpenoids	萜类	Sesquiterpenoids	倍半萜	19888-34-7	2	-	-	-	69409.2	108586	84518.7	669431	802310	828630	1.06985e+06	1.11765e+06	1.118e+06	700546	735319	764179	-	-	-	-
Zjyp102915	UPLC-MS/MS	221.19	147.12	-	-	220.183	C15H24O	[M+H]+	Isocyperol	异香附醇	Terpenoids	萜类	Sesquiterpenoids	倍半萜	-	3	-	-	-	94852.9	75188.6	97725.5	199560	219491	230831	975383	1.02957e+06	859290	395546	491407	490539	-	-	-	-
Lmgp007700	UPLC-MS/MS	235.17	159.12	-	-	234.162	C15H22O2	[M+H]+	8-Keto-9(10)-α-patchoulene-4α-ol	8-酮基-9(10)-α-广藿香烯-4α-醇	Terpenoids	萜类	Sesquiterpenoids	倍半萜	-	2	-	-	-	104510	97344	79448.8	606992	698380	704765	4.7545e+06	5.22903e+06	5.3074e+06	1.68162e+06	1.93974e+06	1.68152e+06	-	-	-	-
Zjyp102907	UPLC-MS/MS	235.17	105.07	-	-	234.162	C15H22O2	[M+H]+	8-hydroxy-1,4a-dimethyl-7-(prop-1-en-2-yl)-4,4a,5,6,7,8-hexahydronaphthalen-2(3H)-one*	8-羟基-1,4a-二甲基-7-(丙-1-烯-2-基)-4,4a,5,6,7,8-六氢萘亚甲基烯-2(3H)-酮*	Terpenoids	萜类	Sesquiterpenoids	倍半萜	-	2	-	-	-	255309	331713	233787	678399	792308	770123	4.8577e+06	5.14882e+06	4.99469e+06	2.60807e+06	2.50181e+06	2.54796e+06	-	-	-	-
Lmgp009054	UPLC-MS/MS	237.18	159.12	-	-	236.178	C15H24O2	[M+H]+	15α-Hydroperoxy-guaia-1(10),11-diene	15α-过氧氢基-愈创木烷-1(10),11-二烯	Terpenoids	萜类	Sesquiterpenoids	倍半萜	-	2	-	-	-	86888.3	110087	122129	483342	615829	524184	4.73711e+06	5.08431e+06	5.10548e+06	2.32236e+06	2.13352e+06	2.10785e+06	-	-	-	-
Zjxp110301	UPLC-MS/MS	295.23	151.11	-	-	294.219	C18H30O3	[M+H]+	3-Hydroxy-3,7,11-trimethyldodeca-1,6E,10-trien-9-yl isobutyrate	3-羟基-3,7,11-三甲基十二碳-1,6E,10-三烯-9-异丁酸酯	Terpenoids	萜类	Sesquiterpenoids	倍半萜	-	2	-	-	-	750051	853040	747846	129909	137332	132329	126285	110046	133806	286916	334711	296541	-	-	-	-
Wbmp011024	UPLC-MS/MS	221.19	203.18	-	-	220.183	C15H24O	[M+H]+	Caryophyllenol II	石竹烯醇II	Terpenoids	萜类	Sesquiterpenoids	倍半萜	32214-89-4	2	-	-	-	51493	46326.4	40880	88929.4	86408.8	84393.9	457648	451115	439588	184409	210961	193353	-	-	-	-
Lafp004533	UPLC-MS/MS	457.21	209.15	-	-	456.199	C22H32O10	[M+H]+	(6R,9R)-3-Oxo-α-ionol-β-D-malonyl-glucoside	(6R,9R)-3-氧代-α-紫罗兰醇-β-D-丙二酰-葡萄糖苷	Terpenoids	萜类	Sesquiterpenoids	倍半萜	-	2	-	-	-	739004	695187	801738	6.16651e+06	6.03718e+06	6.49775e+06	6.3227e+06	6.29015e+06	6.61853e+06	4.56273e+06	4.65736e+06	4.4609e+06	-	-	-	-
Zjyp102905	UPLC-MS/MS	235.17	119.09	-	-	234.162	C15H22O2	[M+H]+	7-epi-teucrenone	7-表-香科酮	Terpenoids	萜类	Sesquiterpenoids	倍半萜	-	2	-	-	-	223791	224651	257027	690308	751915	695982	4.85779e+06	4.64974e+06	4.93179e+06	2.55652e+06	2.36802e+06	2.34233e+06	-	-	-	-
Lmgp011419	UPLC-MS/MS	237.18	191.18	-	-	236.178	C15H24O2	[M+H]+	1α-Hydroperoxy-guaia-10(15),11-diene	1α-过氧氢基-愈创木烷-10(15),11-二烯	Terpenoids	萜类	Sesquiterpenoids	倍半萜	-	2	-	-	-	10113.8	15763.6	23510.4	128840	134918	98513.1	209991	218392	237411	141002	163329	158236	-	-	-	-
Lmgp010173	UPLC-MS/MS	205.16	149.1	-	-	204.151	C14H20O	[M+H]+	14-Nor-β-patchoulane-1(5)-ene-4-one	14-降-β-广藿香烷-1(5)-烯-4-酮	Terpenoids	萜类	Sesquiterpenoids	倍半萜	-	2	-	-	-	185985	168431	181128	293033	313264	336376	1.14396e+06	1.19017e+06	1.15084e+06	754606	679353	730297	-	-	-	-
zjzp121504	UPLC-MS/MS	235.17	119.08	-	-	234.162	C15H22O2	[M+H]+	eupatorenone	半齿泽兰烯酮	Terpenoids	萜类	Sesquiterpenoids	倍半萜	-	2	-	-	-	156424	183254	119914	206349	219273	202937	557966	573006	493390	469692	435562	411725	-	-	-	-
zjzp121608	UPLC-MS/MS	235.17	159.12	-	-	234.162	C15H22O2	[M+H]+	10Hβ-9-oxoageraphorone	10Hβ-9-羰基泽兰素	Terpenoids	萜类	Sesquiterpenoids	倍半萜	-	2	-	-	-	128878	131349	147108	475308	616867	536124	5.54352e+06	5.43687e+06	5.53966e+06	2.45893e+06	2.29955e+06	2.4157e+06	-	-	-	-
zjbp111641	UPLC-MS/MS	269.17	233.16	-	-	268.168	C15H24O4	[M+H]+	1β-hydroxy-4βH-5βH-7βH-11aH-8,9-secoguaia-9(10)-en-8,12-olide	1β-羟基-4βH-5βH-7βH-11aH-8,9-二羟基-9(10)-烯-8,12-内酯	Terpenoids	萜类	Sesquiterpenoids	倍半萜	-	2	-	-	-	6926.87	6926.87	6926.87	6926.87	6926.87	6926.87	88024.6	81198.6	75243.2	52743.8	34634.4	39304	-	-	-	-
Lacp005171	UPLC-MS/MS	371.21	133.1	-	-	370.199	C19H30O7	[M+H]+	3-(3'-Hydroxybutyl)-2,4,4-trimethylcyclohexa-2,5-dienone glucoside	3-(3'-羟基丁基)-2,4,4-三甲基环己烷-2,5-二烯酮葡萄糖苷	Terpenoids	萜类	Sesquiterpenoids	倍半萜	-	2	-	-	-	111805	26503.1	39786	103953	99353.3	51457	125559	98011.5	154174	74888.7	100442	119161	-	-	-	-
Lacp005577	UPLC-MS/MS	457.2	133.1	-	-	456.199	C22H32O10	[M+H]+	3-(3'-Hydroxybutyl)-2,4,4-trimethylcyclohexa-2,5-dienone malonyl glucoside	3-(3'-羟基丁基)-2,4,4-三甲基环己烷-2,5-二烯酮丙二酰葡萄糖苷	Terpenoids	萜类	Sesquiterpenoids	倍半萜	-	2	-	-	-	1.53862e+06	1.83662e+06	1.2979e+06	9.38328e+06	9.77641e+06	1.03603e+07	9.37492e+06	1.15174e+07	7.09651e+06	5.82348e+06	8.0573e+06	4.42839e+06	-	-	-	-
Lmjp003982	UPLC-MS/MS	409.19	247.13	-	-	408.178	C21H28O8	[M+H]+	Chlorajaposide	日本金粟兰苷	Terpenoids	萜类	Sesquiterpenoids	倍半萜	-	2	-	-	-	2.92192e+06	3.03888e+06	2.95695e+06	2.99638e+06	2.86351e+06	2.9614e+06	118651	118651	139109	2.45994e+06	1.79122e+06	2.32245e+06	-	-	-	-
zjbp111626	UPLC-MS/MS	235.17	159.12	-	-	234.162	C15H22O2	[M+H]+	3,4,4α,5,6,7,8,8α-octahydro-7-[1-(hydroxymethyl)ethenyl]-4α-methylnaphthalene-1-carboxaldehyde	3,4,4α,5,6,7,8,8α-八氢-7-[1-(羟基甲基)乙烯基]-4α-甲基萘-1-甲醛	Terpenoids	萜类	Sesquiterpenoids	倍半萜	-	2	-	-	-	212692	212734	218436	127847	174500	133482	1.03909e+06	1.03727e+06	871998	607392	903896	783174	-	-	-	-
Lmqp003432	UPLC-MS/MS	227.16	121.1	-	-	226.157	C13H22O3	[M+H]+	6,9-Dihydroxy-7-megastigmen-3-one	6,9-二羟基-7-巨豆烯-3-酮	Terpenoids	萜类	Sesquiterpenoids	倍半萜	-	2	-	-	-	538821	517693	463885	3.45432e+06	3.50508e+06	3.31658e+06	7.39666e+06	7.13246e+06	6.7098e+06	4.11363e+06	4.24932e+06	4.27902e+06	-	-	-	-
Qmyp101229	UPLC-MS/MS	237.18	109.1	-	-	236.178	C15H24O2	[M+H]+	1β-Hydroxy-α-cyperone	1β-羟基-α-香附酮	Terpenoids	萜类	Sesquiterpenoids	倍半萜	-	2	-	-	-	27047.8	15475.5	17710.1	103315	115936	107390	283285	247063	285637	168181	172184	152225	-	-	-	-
Lacp005602	UPLC-MS/MS	459.22	211.17	-	-	458.215	C22H34O10	[M+H]+	Blumenol C malonyl Glucoside	布卢门醇 C 丙二酰葡萄糖苷	Terpenoids	萜类	Sesquiterpenoids	倍半萜	-	2	-	-	-	28794.5	28794.5	28794.5	144093	143973	209474	749980	710299	559356	250104	267012	346299	-	-	-	-
Lhlp120619	UPLC-MS/MS	263.2	95.08	-	-	262.193	C17H26O2	[M+H]+	(6R)-Hydroxy-α-humulene acetate	(6R)-Hydroxy-α-humulene acetate	Terpenoids	萜类	Sesquiterpenoids	倍半萜	-	2	-	-	-	939133	1.07697e+06	900675	208320	230750	243974	79638.8	67586.8	144887	566375	438259	483741	-	-	-	-
Lwmp121421	UPLC-MS/MS	253.18	161.09	-	-	252.173	C15H24O3	[M+H]+	Expoxy-1,10-dihydrocurdione	环氧-1,10-二氢姜黄二酮	Terpenoids	萜类	Sesquiterpenoids	倍半萜	-	2	-	-	-	12909.3	12909.3	64546.5	207737	185348	211715	289362	370562	483839	229538	236957	190706	-	-	-	-
MWSCX010	UPLC-MS/MS	237.18	107.08	-	-	236.178	C15H24O2	[M+H]+	Humula-3(12),7(13),9(E)-triene-2,6-diol	蛇麻-3(12),7(13),9(E)-三烯-2,6-二醇	Terpenoids	萜类	Sesquiterpenoids	倍半萜	-	2	-	-	-	154605	107550	96951.4	224406	222950	286049	1.97271e+06	1.90634e+06	1.99809e+06	809959	773586	739352	-	-	-	-
Lmcp006840	UPLC-MS/MS	221.19	135.12	-	-	220.183	C15H24O	[M+H]+	Spathulenol	匙叶桉油烯醇	Terpenoids	萜类	Sesquiterpenoids	倍半萜	6750-60-3	2	-	-	-	26678.8	26678.8	26678.8	26678.8	26678.8	26678.8	427000	453857	409855	133394	196083	191238	-	-	-	-
zjbp111601	UPLC-MS/MS	237.18	145.1	-	-	236.178	C15H24O2	[M+H]+	Baimuxinal	白木香醛	Terpenoids	萜类	Sesquiterpenoids	倍半萜	86408-21-1	2	-	-	-	771985	835931	747388	2.49476e+06	2.79759e+06	2.48669e+06	8.53962e+06	8.59234e+06	8.3656e+06	4.36184e+06	4.67498e+06	4.53249e+06	-	-	-	-
Qmjp080606	UPLC-MS/MS	221.19	81.07	-	-	220.183	C15H24O	[M+H]+	Acolamone	白菖蒲新酮	Terpenoids	萜类	Sesquiterpenoids	倍半萜	39012-14-1	2	-	-	-	281233	262395	260755	316554	372479	357853	2.34927e+06	2.43693e+06	2.19917e+06	940465	1.16695e+06	1.03832e+06	-	-	-	-
MWSHC2078	UPLC-MS/MS	237.18	145.1	-	-	236.178	C15H24O2	[M+H]+	10α-Hydroxycadin-4-en-15-al	10α-羟基杜松-4-烯-15-醛	Terpenoids	萜类	Sesquiterpenoids	倍半萜	398147-37-0	2	-	-	-	78392.3	77673.4	70843.3	203097	222298	253676	1.81488e+06	1.81989e+06	1.97685e+06	721245	660924	718067	-	-	-	-
Lhfp110805	UPLC-MS/MS	237.18	109.1	-	-	236.178	C15H24O2	[M+H]+	Petasitolone	蜂斗菜醇酮	Terpenoids	萜类	Sesquiterpenoids	倍半萜	35124-22-2	2	-	-	-	22991.2	44179	18048.1	114638	123054	127250	267104	248880	262402	172259	192072	170044	-	-	-	-
MWSmce642	UPLC-MS/MS	237.19	135.12	-	-	236.178	C15H24O2	[M+H]+	Curcumol	莪术醇	Terpenoids	萜类	Sesquiterpenoids	倍半萜	4871-97-0	2	-	-	-	22143.5	33750.8	26557.5	168896	180337	174218	395289	385020	362736	236470	255240	264063	-	-	-	-
Qatp009393	UPLC-MS/MS	235.17	105.07	-	-	234.162	C15H22O2	[M+H]+	Dihydrocostunolide	二氢广木香内酯	Terpenoids	萜类	Sesquiterpenoids	倍半萜	2225-79-8	2	-	-	-	126347	172048	159984	367505	447649	422133	3.84623e+06	3.79774e+06	3.74507e+06	2.07249e+06	2.06045e+06	2.1427e+06	-	-	-	-
Sacp008256	UPLC-MS/MS	221.19	147.12	-	-	220.183	C15H24O	[M+H]+	isoshyobunone	异水菖蒲酮	Terpenoids	萜类	Sesquiterpenoids	倍半萜	21698-46-4	2	-	-	-	77837.9	73673.8	45279.1	127075	192537	27170.4	2.51112e+06	2.58462e+06	2.54332e+06	1.26782e+06	1.30019e+06	1.40258e+06	-	-	-	-
Hmlp007639	UPLC-MS/MS	237.18	149.02	-	-	236.178	C15H24O2	[M+H]+	Capsidiol	辣椒醇	Terpenoids	萜类	Sesquiterpenoids	倍半萜	37208-05-2	3	-	-	-	321625	372481	338178	993664	1.0405e+06	1.01346e+06	3.51667e+06	3.33709e+06	3.55158e+06	1.76103e+06	1.7365e+06	1.73415e+06	C09627	ko00909	C09627	-
MWSslk234	UPLC-MS/MS	219.17	121.07	-	-	218.167	C15H22O	[M+H]+	Aristolone	马兜铃酮	Terpenoids	萜类	Sesquiterpenoids	倍半萜	25274-27-5	3	-	-	-	272555	327181	280609	2.21518e+06	2.34831e+06	2.12159e+06	2.25924e+07	2.49617e+07	2.42664e+07	9.78724e+06	9.27534e+06	9.62055e+06	-	-	-	-
Hmcp003852	UPLC-MS/MS	223.21	207.03	-	-	222.198	C15H26O	[M+H]+	Elemol	榄香醇	Terpenoids	萜类	Sesquiterpenoids	倍半萜	639-99-6	3	-	-	-	2.27825e+07	2.22283e+07	2.16175e+07	3.45088e+07	3.77409e+07	3.42442e+07	1.92368e+07	1.74985e+07	2.41414e+07	2.19074e+07	1.64073e+07	1.80125e+07	-	-	-	-
Jmcp007378	UPLC-MS/MS	223.21	149.13	-	-	222.198	C15H26O	[M+H]+	Enantio-7(11)eudesmen-4-ol	刺柏脑	Terpenoids	萜类	Sesquiterpenoids	倍半萜	186374-63-0	3	-	-	-	551630	550690	588210	568585	599966	564810	779745	750117	866278	541340	520096	495563	-	-	-	-
Lmgn009404	UPLC-MS/MS	235.13	191.14	-	-	236.141	C14H20O3	[M-H]-	Pocahemiketal B	广藿香倍半萜半缩醛 B	Terpenoids	萜类	Sesquiterpenoids	倍半萜	-	2	-	-	-	141753	171802	125940	483937	525563	571594	1.19957e+06	1.21523e+06	1.2046e+06	621285	664319	556400	-	-	-	-
Jmcn008002	UPLC-MS/MS	251.17	191.14	-	-	252.173	C15H24O3	[M-H]-	Ilicic acid	冬青豚草酸	Terpenoids	萜类	Sesquiterpenoids	倍半萜	4586-68-9	2	-	-	-	186736	218254	175310	12927.4	12927.4	12927.4	12927.4	12927.4	12927.4	90769.6	68460.9	64637.2	-	-	-	-
Hmcn003273	UPLC-MS/MS	247.13	203.14	-	-	248.141	C15H20O3	[M-H]-	Reynosin	瑞诺木烯内酯	Terpenoids	萜类	Sesquiterpenoids	倍半萜	28254-53-7	3	-	-	-	17244.7	17244.7	17244.7	86223.6	117625	99184.9	143159	154065	152335	111297	109657	110099	-	-	-	-
Lmgp007564	UPLC-MS/MS	237.18	201.16	-	-	236.178	C15H24O2	[M+H]+	11-Dehydroxy-cinnamosin A	11-Dehydroxy-cinnamosin A	Terpenoids	萜类	Sesquiterpenoids	倍半萜	-	3	-	-	-	43603	45827.3	43511.6	101359	136917	163160	1.24766e+06	1.33357e+06	1.26901e+06	507050	420627	429727	-	-	-	-
Zbyn002532	UPLC-MS/MS	375.13	213.08	-	-	376.137	C16H24O10	[M-H]-	8-Epiloganic acid	8-表马钱子苷酸	Terpenoids	萜类	Monoterpenoids	倍萜	82509-41-9	2	-	-	-	2.85179e+06	3.7108e+06	3.12088e+06	779381	735109	1.00282e+06	291294	317346	268456	1.3939e+06	1.24139e+06	1.31457e+06	-	-	-	-
Lmjp004816	UPLC-MS/MS	197.12	133.1	-	-	196.11	C11H16O3	[M+H]+	Loliolide	黑麦草内酯	Terpenoids	萜类	Monoterpenoids	倍萜	5989-02-6	2	-	-	-	243512	217890	202816	619606	689166	781558	3.56771e+06	3.38754e+06	3.90002e+06	1.91565e+06	1.71469e+06	1.71762e+06	-	-	-	-
Zjyp102918	UPLC-MS/MS	221.19	119.08	-	-	220.183	C15H24O	[M+H]+	Epinootkatol	表圆柚醇	Terpenoids	萜类	Sesquiterpenoids	倍半萜	-	2	-	-	-	170087	170087	170087	898817	850435	902271	5.94241e+06	6.93716e+06	6.29457e+06	2.78555e+06	3.19899e+06	3.11344e+06	-	-	-	-
pmp001133	UPLC-MS/MS	279.233	173.133	-	-	278.193	C17H28NO2+	[M+H]+	N-Methyldendrobine	N-甲基石斛碱	Alkaloids	生物碱	Sesquiterpene alkaloids	倍半萜类生物碱	-	3	-	-	-	189607	182765	176093	66367.1	53727.9	59880.1	68511.7	94183.9	93438.6	101775	124921	85322.8	-	-	-	-
MWSslk129	UPLC-MS/MS	151.11	109.06	-	-	150.105	C10H14O	[M+H]+	Verbenone	马鞭草烯酮	Terpenoids	萜类	Monoterpenoids	倍萜	1196-01-6	3	-	-	-	122589	101144	130200	44406.1	35867.7	42706.7	40616.3	59251.4	95159.8	91790.6	73235.9	90748.1	-	-	-	-
Wmhn000017	UPLC-MS/MS	675.28	163.04	-	-	676.294	C31H48O16	[M-H]-	inerminoside A	吲哚美辛 A	Terpenoids	萜类	Monoterpenoids	倍萜	-	3	-	-	-	1373.33	6871.38	1373.33	6866.67	16651.9	11156.8	1373.33	48352.1	1373.33	22549.8	15690.8	20588.8	-	-	-	-
Lmzp003207	UPLC-MS/MS	333.19	153.13	-	-	332.183	C16H28O7	[M+H]+	(3R,4R)-p-Menth-1-ene-3,4-diol-3-O-β-D-glucoside*	(3R,4R)-对薄荷-1-烯-3,4-二醇-3-O-β-D-葡萄糖苷*	Terpenoids	萜类	Monoterpenoids	倍萜	-	2	-	-	-	8453.69	42268.5	8453.69	50724.7	94545.1	110840	493028	403591	368785	248824	229941	212834	-	-	-	-
Lmzp003064	UPLC-MS/MS	333.19	153.13	-	-	332.183	C16H28O7	[M+H]+	(3R,4S,6R)-p-Menth-1-ene-3,6-diol-3-O-β-D-glucoside*	(3R,4S,6R)-对薄荷-1-烯-3,6-二醇-3-O-β-D-葡萄糖苷*	Terpenoids	萜类	Monoterpenoids	倍萜	-	2	-	-	-	6340.9	31704.5	6340.9	86641.5	68672.2	63399.5	460646	417096	455434	172218	220819	225044	-	-	-	-
HX1223	UPLC-MS/MS	221.19	105.07	-	-	220.183	C15H24O	[M+H]+	Germacra-1(10),4,7(11)-trien-9α-ol	大牻牛儿-1(10),4,7(11)-三烯-9α-醇	Terpenoids	萜类	Monoterpenoids	倍萜	-	2	-	-	-	121344	153428	172576	337652	379601	395979	1.34396e+06	1.47407e+06	1.31621e+06	630680	703205	723929	-	-	-	-
pmp000713	UPLC-MS/MS	556.22	179.07	-	-	538.19	C22H34O15	[M+NH4]+	6'-O-D-Glucosylloganic acid	6'-O-D-葡萄糖酰马钱苷酸	Terpenoids	萜类	Monoterpenoids	倍萜	-	2	-	-	-	308877	275346	272445	404465	606197	398556	297399	244945	401602	350986	343034	351360	-	-	-	-
mws1526	UPLC-MS/MS	359.13	197.08	-	-	358.126	C16H22O9	[M+H]+	Sweroside	獐牙菜苷	Terpenoids	萜类	Monoterpenoids	倍萜	14215-86-2	2	-	-	-	2.0808e+06	2.27677e+06	2.70748e+06	234553	241909	195099	184023	120451	285255	674609	763506	759435	C17071	-	C17071	-
mws1565	UPLC-MS/MS	389.14	209.08	-	-	388.137	C17H24O10	[M+H]+	Geniposide	京尼平苷	Terpenoids	萜类	Monoterpenoids	倍萜	24512-63-8	2	-	-	-	185951	290687	174168	382225	493715	393232	799587	695506	529440	374966	351558	416010	C09781	-	C09781	-
Lmdp002381	UPLC-MS/MS	227.09	149.06	-	-	226.084	C11H14O5	[M+H]+	Genipin	京尼平	Terpenoids	萜类	Monoterpenoids	倍萜	6902-77-8	2	-	-	-	631795	851550	860138	8.10651e+06	7.13944e+06	8.16021e+06	1.32887e+07	1.242e+07	1.41862e+07	8.83057e+06	8.66558e+06	7.60412e+06	C09780	-	C09780	-
Zbjp004247	UPLC-MS/MS	333.19	135.12	-	-	332.183	C16H28O7	[M+H]+	2,6-Dimethyl-6-hydroxy-2,7-octadienyl-β-D-glucoside (Betulalbuside A; Betulabuside A)	6-羟基-2,6-二甲基-2,7-辛二烯-1-基-β-D-葡萄糖苷	Terpenoids	萜类	Monoterpenoids	倍萜	64776-96-1	2	-	-	-	13630.5	13630.5	13630.5	13630.5	13630.5	13630.5	167993	188065	254566	116226	68152.7	153213	-	-	-	-
Lhlp120627	UPLC-MS/MS	195.14	67.05	-	-	194.131	C12H18O2	[M+H]+	Carvylacetate	乙酸香芹酯	Terpenoids	萜类	Monoterpenoids	倍萜	97-42-7	2	-	-	-	135896	133666	126691	138930	158631	178153	112613	119311	127843	126191	148708	137278	-	-	-	-
Cmlp002163	UPLC-MS/MS	375.13	213.08	-	-	374.121	C16H22O10	[M+H]+	Gentioflavoside	龙胆黄苷	Terpenoids	萜类	Monoterpenoids	倍萜	34239-17-3	2	-	-	-	696436	753533	689721	50848.2	50846.5	48610.7	9722.14	9722.14	9722.14	244215	236680	222528	-	-	-	-
Wmhp000029	UPLC-MS/MS	665.28	524.21	-	-	664.273	C33H44O14	[M+H]+	clerodendrin F	海常黄苷 F	Terpenoids	萜类	Ditepenoids	二萜	-	2	-	-	-	13344.9	13344.9	13344.9	66724.4	85820.7	85242.3	1.20744e+06	1.94069e+06	1.03277e+06	513010	650617	534373	-	-	-	-
Lmjp003834	UPLC-MS/MS	523.18	177.06	-	-	522.174	C25H30O12	[M+H]+	6-O-p-Methoxycinnamoylcatalpol	6-O-对甲氧基肉桂酰梓醇	Terpenoids	萜类	Monoterpenoids	倍萜	121710-02-9	2	-	-	-	243469	258028	285323	144656	67171.1	78918.8	25466.2	34868.2	52616.3	97706.3	105221	88817.1	-	-	-	-
Cmhp003670	UPLC-MS/MS	389.14	165.06	-	-	388.137	C17H24O10	[M+H]+	Secologanin	裂环马钱素	Terpenoids	萜类	Monoterpenoids	倍萜	19351-63-4	3	-	-	-	145071	136467	148759	39351	7870.19	7870.19	7870.19	7870.19	7870.19	79459.5	44267.1	46727	C01852	ko00901,ko00902,ko00950,ko01100,ko01110	C01852	-
pmp000695	UPLC-MS/MS	375.13	177.05	-	-	374.121	C16H22O10	[M+H]+	Swertiamarin	獐牙菜苦苷	Terpenoids	萜类	Monoterpenoids	倍萜	17388-39-5	3	-	-	-	26273.4	45931.3	79679.7	164545	187313	214254	180044	215254	297055	240128	182141	168964	C09800	-	C09800	-
MWSmce235	UPLC-MS/MS	389.14	195.06	-	-	388.137	C17H24O10	[M+H]+	Verbenalin; Cornin	马鞭草苷; 山茱萸苷	Terpenoids	萜类	Monoterpenoids	倍萜	548-37-8	3	-	-	-	204211	212451	269028	29235.7	35296.7	3230.6	50815.5	70380.7	59954	84298.7	87758.9	104697	C09802	-	C09802	-
Cmlp003088	UPLC-MS/MS	405.14	211.06	-	-	404.132	C17H24O11	[M+H]+	Gentioside(iridoid)	龙胆苷	Terpenoids	萜类	Monoterpenoids	倍萜	35930-28-0	3	-	-	-	4129.26	4129.26	4129.26	53343.2	78739.8	59278.5	34992.5	24561.8	32181.8	20646.3	33871.5	39551.5	-	-	-	-
Wmzp000567	UPLC-MS/MS	635.34	201.13	-	-	634.335	C34H50O11	[M+H]+	Ajugamacrin E	大籽筋骨草素 E	Terpenoids	萜类	Ditepenoids	二萜	-	2	-	-	-	842118	738264	687093	302133	367561	302053	341166	348279	372512	402000	429006	467463	-	-	-	-
Qmmp111811	UPLC-MS/MS	303.232	95.0857	-	-	302.225	C20H30O2	[M+H]+	3-Epi-Isolophanthin A*	3-表异狭基线纹香茶菜素 A*	Terpenoids	萜类	Ditepenoids	二萜	-	2	-	-	-	417539	425961	391453	316517	338263	336425	202622	152960	162058	179075	206537	210428	-	-	-	-
pmp000703	UPLC-MS/MS	538.21	197.08	-	-	520.179	C22H32O14	[M+NH4]+	6'-O-D-Glucosylsweroside	6'-O-D-葡萄糖酰獐牙菜苷	Terpenoids	萜类	Monoterpenoids	倍萜	-	3	-	-	-	81792.1	68818.6	93552.4	83984.5	76926.2	87089.9	292418	368298	436134	235754	214483	240791	-	-	-	-
pmp001068	UPLC-MS/MS	714.26	309.1	-	-	696.226	C32H40O17	[M+NH4]+	6''-O-p-Coumaroylgenipin gentiobioside	6''-O-对-香豆酰基京尼平龙胆双糖苷	Terpenoids	萜类	Monoterpenoids	倍萜	-	3	-	-	-	1916.81	9584.07	1916.81	15634.7	1916.81	1916.81	213156	156336	187778	55922.7	55109.9	102652	-	-	-	-
pmp001069	UPLC-MS/MS	730.26	209.08	-	-	712.221	C32H40O18	[M+NH4]+	6''-O-Trans-Caffeoylgenipin gentiobioside	6''-O-反式咖啡酰京尼平龙胆双糖苷	Terpenoids	萜类	Monoterpenoids	倍萜	-	3	-	-	-	13502.5	20114.3	10983.7	92578.9	107270	104695	195537	210428	273757	151411	139113	155601	-	-	-	-
Lmdn005219	UPLC-MS/MS	373.19	331.17	-	-	374.194	C18H30O8	[M-H]-	p-Menth-4(5)-ene-1,2-diol-1-O-β-D-(2-O-acetyl)-glucoside	对薄荷-4(5)-烯-1,2-二醇-1-O-β-D-(2'-O-乙酰基)-葡萄糖苷	Terpenoids	萜类	Monoterpenoids	倍萜	-	2	-	-	-	357134	430342	351033	73099.9	42692	200076	56763.6	54118.3	54542.8	51483.2	80357	82794.9	-	-	-	-
Lmdn005428	UPLC-MS/MS	329.16	225.15	-	-	330.168	C16H26O7	[M-H]-	Thymuside A	Thymuside A	Terpenoids	萜类	Monoterpenoids	倍萜	-	2	-	-	-	149293	139565	133477	1.18118e+06	1.23999e+06	1.21348e+06	2.24069e+06	2.16251e+06	2.87181e+06	1.04425e+06	1.19817e+06	1.2896e+06	-	-	-	-
Cmbn003318	UPLC-MS/MS	537.16	161.03	-	-	538.169	C25H30O13	[M-H]-	5-Hydroxy-10-O-(p-methoxycinnamoyl)adoxosidic acid	5-羟基-10-O-p-甲氧基肉桂酰基五福花苷酸	Terpenoids	萜类	Monoterpenoids	倍萜	-	2	-	-	-	1.34077e+06	1.62673e+06	1.30164e+06	5.5349e+06	6.92657e+06	7.38479e+06	999932	983458	759959	2.36175e+06	3.29843e+06	2.11565e+06	-	-	-	-
mws1574	UPLC-MS/MS	373.11	123.01	-	-	374.121	C16H22O10	[M-H]-	Geniposidic acid*	京尼平苷酸*	Terpenoids	萜类	Monoterpenoids	倍萜	27741-01-1	2	-	-	-	2.98698e+06	3.49225e+06	3.65332e+06	1.23512e+06	1.16827e+06	1.36233e+06	1.55269e+06	1.55704e+06	1.34912e+06	2.28783e+06	2.27793e+06	2.19613e+06	C11673	ko00902,ko01110	C11673	-
Lmnn102603	UPLC-MS/MS	387.17	207.1	-	-	388.173	C18H28O9	[M-H]-	Nuezhengalaside	女贞苦苷	Terpenoids	萜类	Monoterpenoids	倍萜	-	2	-	-	-	9.3135e+06	1.08973e+07	1.16148e+07	5.317e+07	5.16967e+07	5.46587e+07	4.73678e+07	4.33254e+07	4.64516e+07	3.53817e+07	4.09414e+07	3.78826e+07	-	-	-	-
Lmdn001501	UPLC-MS/MS	373.11	123.05	-	-	374.121	C16H22O10	[M-H]-	Gardoside*	栀子新苷*	Terpenoids	萜类	Monoterpenoids	倍萜	54835-76-6	2	-	-	-	2.44464e+06	3.43027e+06	3.45243e+06	1.28074e+06	1.40069e+06	1.39863e+06	1.49219e+06	1.76255e+06	1.50708e+06	2.40728e+06	1.98982e+06	2.18082e+06	C16963	-	C16963	-
Cmrn001591	UPLC-MS/MS	375.13	169.09	-	-	376.137	C16H24O10	[M-H]-	Mussaenosidic acid	玉叶金花苷酸	Terpenoids	萜类	Monoterpenoids	倍萜	82451-22-7	2	-	-	-	4.51141e+06	7.81826e+06	5.75546e+06	1.37877e+06	1.09698e+06	2.14947e+06	520429	563745	509792	2.8083e+06	2.35371e+06	3.21092e+06	-	-	-	-
Lmdn001560	UPLC-MS/MS	345.12	165.06	-	-	346.126	C15H22O9	[M-H]-	6-DeoxyCatalpol	6-脱氧梓醇	Terpenoids	萜类	Monoterpenoids	倍萜	99499-99-7	2	-	-	-	196345	267883	322719	144298	237441	216547	125560	104285	110638	180369	140462	250443	-	-	-	-
Jmmn002533	UPLC-MS/MS	475.18	179.07	-	-	476.189	C21H32O12	[M-H]-	coleoside-B	coleoside-B	Terpenoids	萜类	Monoterpenoids	倍萜	-	2	-	-	-	6.80574e+06	6.52413e+06	7.55933e+06	6.88142e+06	7.12359e+06	8.44932e+06	587039	574339	582234	4.30228e+06	2.66569e+06	3.27293e+06	-	-	-	-
Lmdn003075	UPLC-MS/MS	389.15	167.07	-	-	390.153	C17H26O10	[M-H]-	3,4-Dihydroverbenalin	3,4-二氢马鞭草苷	Terpenoids	萜类	Monoterpenoids	倍萜	-	2	-	-	-	63748.7	128114	115454	285966	167928	343034	1.3756e+06	1.4593e+06	1.21752e+06	876900	739768	764943	-	-	-	-
Zbbn002910	UPLC-MS/MS	725.2	353.09	-	-	726.216	C36H38O16	[M-H]-	6''-O-sinapoyl-7-O-caffeoyl-geniposide	6''-O-芥子酰基-7-O-咖啡酰京尼平苷	Terpenoids	萜类	Monoterpenoids	倍萜	-	2	-	-	-	3083.41	10786.1	5796.24	88088.8	111465	198260	798110	709627	745753	507020	438453	505984	-	-	-	-
Lmdn004261	UPLC-MS/MS	523.18	193.05	-	-	524.189	C25H32O12	[M-H]-	6-O-Feruloylajugol	6-O-阿魏酰筋骨草醇	Terpenoids	萜类	Monoterpenoids	倍萜	-	2	-	-	-	3243.65	3243.65	3243.65	46425.1	16218.3	31393.5	392135	425214	373305	173559	196094	204067	-	-	-	-
Zbyn002745	UPLC-MS/MS	375.13	213.08	-	-	376.137	C16H24O10	[M-H]-	Loganic acid	马钱苷酸	Terpenoids	萜类	Monoterpenoids	倍萜	22255-40-9	2	-	-	-	2.42644e+06	2.82275e+06	3.59679e+06	552728	604505	925821	210587	162369	169747	930721	1.15126e+06	1.60234e+06	C01512	ko00902,ko01110	C01512	-
Lmjn003376	UPLC-MS/MS	483.15	137.02	-	-	484.158	C22H28O12	[M-H]-	3,4-Dihydrocatalposide	3,4-二氢梓苷	Terpenoids	萜类	Monoterpenoids	倍萜	-	3	-	-	-	206772	237901	137157	447816	220275	161030	4365.67	21828.4	4365.67	158533	234785	122044	-	-	-	-
Xmmn006031	UPLC-MS/MS	447.22	315.18	-	-	448.231	C21H36O10	[M-H]-	Borneol 7-O-[β-D-apiofuranosyl-(1→6)]-β-D-glucopyranoside	龙脑 7-O-[β-D-呋喃芹糖基-(1→6)]-β-D-吡喃葡萄糖苷	Terpenoids	萜类	Monoterpenoids	倍萜	88700-35-0	2	-	-	-	67058.5	76917.4	46684.3	1.34697e+06	1.19613e+06	1.17152e+06	4.73288e+06	4.74602e+06	5.70445e+06	2.82303e+06	2.93164e+06	2.56957e+06	-	-	-	-
Zmsn002575	UPLC-MS/MS	403.12	223.07	-	-	404.132	C17H24O11	[M-H]-	Hastatoside	戟叶马鞭草苷	Terpenoids	萜类	Monoterpenoids	倍萜	50816-24-5	2	-	-	-	724306	1.09117e+06	1.05749e+06	673786	812425	775937	703666	737114	720734	743417	894424	910838	-	-	-	-
Hmcn001415	UPLC-MS/MS	387.13	225.07	-	-	388.137	C17H24O10	[M-H]-	Majoroside	珠子参苷; 大车前草苷	Terpenoids	萜类	Monoterpenoids	倍萜	134140-02-6	2	-	-	-	133056	176771	225198	407702	306071	377934	235901	189890	209047	203382	174286	214331	-	-	-	-
Cmdn003997	UPLC-MS/MS	609.2	447.12	-	-	610.211	C25H38O17	[M-H]-	6'-O-α-D-galactosylbarlerin*	6'-O-α-D-半乳糖基(8-O-乙酰山栀苷甲酯)*	Terpenoids	萜类	Monoterpenoids	倍萜	927691-89-2	2	-	-	-	36904.1	58047.6	32688.7	347505	335666	548370	1.39654e+06	1.68668e+06	1.44579e+06	720003	639193	607722	-	-	-	-
Cmdn004285	UPLC-MS/MS	609.2	447.12	-	-	610.211	C25H38O17	[M-H]-	6'-O-β-D-glucosylbarlerin*	6'-O-β-D-葡萄糖基(8-O-乙酰山栀苷甲酯)*	Terpenoids	萜类	Monoterpenoids	倍萜	927691-88-1	2	-	-	-	821323	936520	924860	3.04153e+06	3.05668e+06	3.66411e+06	5.80609e+06	6.07829e+06	6.64073e+06	3.59507e+06	3.32121e+06	2.99338e+06	-	-	-	-
Xmln005368	UPLC-MS/MS	221.12	177.13	-	-	222.126	C13H18O3	[M-H]-	Dehydrovomifoliol	去氢催吐萝芙木醇	Terpenoids	萜类	Monoterpenoids	倍萜	15764-81-5	2	-	-	-	6336.05	6336.05	6336.05	46345.7	31680.2	45884.7	132820	109860	120206	75316.6	90104.1	62227.5	-	-	-	-
Cmdn002964	UPLC-MS/MS	567.2	243.09	-	-	568.2	C23H36O16	[M-H]-	6'-O-α-D-galactosylshanzhiside methyl ester	6'-O-α-D-半乳糖基山栀苷甲酯	Terpenoids	萜类	Monoterpenoids	倍萜	927707-47-9	3	-	-	-	65502.8	55411.1	88643.2	43848.2	36546.1	45471.4	21165.2	17534.5	17111.6	43296.2	35927.3	36910.7	-	-	-	-
pmn001587	UPLC-MS/MS	431.12	269.07	-	-	432.127	C18H24O12	[M-H]-	Asperulosidic acid	车叶草苷酸	Terpenoids	萜类	Monoterpenoids	倍萜	25368-11-0	3	-	-	-	264655	328503	304651	709063	535292	911946	688323	763119	749009	544374	669115	566609	-	-	-	-
Cmrn002205	UPLC-MS/MS	329.12	209.07	-	-	330.132	C15H22O8	[M-H]-	Bartsioside	巴斯苷	Terpenoids	萜类	Monoterpenoids	倍萜	62133-72-6	3	-	-	-	52254.9	98097.9	94486	68741.8	18907.3	85431.6	892584	999799	672966	546834	660198	479602	-	-	-	-
pmn001738	UPLC-MS/MS	403.12	223.06	-	-	404.132	C17H24O11	[M-H]-	Oleoside 11-methyl ester	木樨榄苷-11-甲酯	Terpenoids	萜类	Monoterpenoids	倍萜	60539-23-3	3	-	-	-	627208	579135	649569	140878	156531	152060	61092.2	164353	108940	214651	393604	246763	-	-	-	-
Wmhn000023	UPLC-MS/MS	663.27	603.3	-	-	664.273	C33H44O14	[M-H]-	Clerodendrin I	海常黄苷 I	Terpenoids	萜类	Ditepenoids	二萜	-	2	-	-	-	256591	256591	256591	2.73206e+06	5.92839e+06	1.82509e+06	1.49213e+06	1.91139e+06	1.87443e+06	1.28295e+06	1.73631e+06	1.58909e+06	-	-	-	-
Wmcp000015	UPLC-MS/MS	333.21	315.2	-	-	332.199	C20H28O4	[M+H]+	clerodermic acid	海州常山二萜酸	Terpenoids	萜类	Monoterpenoids	倍萜	-	3	-	-	-	94653	64810.4	61486.5	9172.16	14834	16618.1	1834.43	1834.43	1834.43	28116.3	24880.2	32479.8	-	-	-	-
Qmxp101501	UPLC-MS/MS	241.14	137.09	-	-	240.136	C13H20O4	[M+H]+	13-Carboxy-blumenol C	13-羧基布卢姆醇C	Terpenoids	萜类	Monoterpenoids	倍萜	-	3	-	-	-	220312	179458	180514	61431.8	81228.2	76491.2	12286.4	12286.4	12286.4	83132.8	75824.4	128276	-	-	-	-
pme2268	UPLC-MS/MS	138.06	94.07	-	-	137.048	C7H7NO2	[M+H]+	Trigonelline	葫芦巴碱	Alkaloids	生物碱	Pyridine alkaloids	吡啶类生物碱	535-83-1	1	-	-	-	1.51082e+07	1.60542e+07	1.6031e+07	8.15807e+07	7.83884e+07	8.7611e+07	9.01961e+07	8.9684e+07	8.46612e+07	7.93627e+07	8.14e+07	8.34438e+07	C01004	ko00960	C01004	-
Wayp007255	UPLC-MS/MS	289.23	149.11	-	-	288.22	C18H28N2O	[M+H]+	N-Nonanoyl nornicotine	N-壬酰基去甲烟碱	Alkaloids	生物碱	Pyridine alkaloids	吡啶类生物碱	-	2	-	-	-	16189.8	16189.8	16189.8	86267.4	80948.8	112512	1.58135e+06	1.45874e+06	1.57037e+06	719724	762688	688006	-	-	-	-
Zblp001009	UPLC-MS/MS	272.11	110.06	-	-	271.106	C12H17NO6	[M+H]+	3-pyridine-methanol-O-β-D-glucopyranosyl	3-吡啶-甲醇-O-β-D-吡喃葡萄糖基	Alkaloids	生物碱	Pyridine alkaloids	吡啶类生物碱	-	2	-	-	-	355555	374323	342720	91929.4	111017	127850	360035	394495	368085	204645	229988	226606	-	-	-	-
MWS0687	UPLC-MS/MS	153.07	108.04	-	-	152.059	C7H8N2O2	[M+H]+	1-Methyl-6-Oxo-1,6-Dihydropyridine-3-Carboxamide	1-甲基-6-氧-1,6-二氢吡啶-3-羧酰胺	Alkaloids	生物碱	Pyridine alkaloids	吡啶类生物碱	701-44-0	2	-	-	-	1.03435e+06	1.08227e+06	1.03158e+06	459917	394137	440922	141337	165688	128693	462893	462231	440448	-	-	-	-
Smhp002290	UPLC-MS/MS	216.17	160.11	-	-	215.167	C15H21N	[M+H]+	Epiguaipyridine	表愈创吡啶	Alkaloids	生物碱	Pyridine alkaloids	吡啶类生物碱	-	3	-	-	-	41044.7	29578.7	33207.7	5772.04	5772.04	5772.04	72320.6	107001	96165.8	41457.1	28860.2	39063.9	-	-	-	-
Wmbn000568	UPLC-MS/MS	549.23	489.21	-	-	550.241	C28H38O11	[M-H]-	Ajugapantin A	山苦草素A	Terpenoids	萜类	Ditepenoids	二萜	-	2	-	-	-	222307	253794	116702	8538.53	8538.53	8538.53	8538.53	8538.53	8538.53	53921.6	42692.7	59269.2	-	-	-	-
MWS1787	UPLC-MS/MS	94.07	53.04	-	-	93.0578	C6H7N	[M+H]+	2-Picoline; 2-Methylpyridine	2-甲基吡啶	Alkaloids	生物碱	Pyridine alkaloids	吡啶类生物碱	109-06-8	3	-	-	-	629621	614278	612746	443038	550863	465539	557536	771202	546151	484858	596743	559455	C14447	-	C14447	-
pme1738	UPLC-MS/MS	138.08	94.07	-	-	137.071	C7H9N2O	[M+H]+	3-Carbamyl-1-methylpyridinium;(1-Methylnicotinamide)	3-氨基甲酰-1-甲基氧化吡啶	Alkaloids	生物碱	Pyridine alkaloids	吡啶类生物碱	1005-24-9	3	-	-	-	1.48797e+07	1.53005e+07	1.65114e+07	7.56199e+07	7.81624e+07	7.25103e+07	87358909	9.09772e+07	8.09362e+07	8.03596e+07	7.55766e+07	7.82684e+07	C02918	ko00760,ko01100	C02918	-
MWSslk020	UPLC-MS/MS	156.1	72.94	-	-	155.095	C8H13NO2	[M+H]+	Arecoline	槟榔碱	Alkaloids	生物碱	Pyridine alkaloids	吡啶类生物碱	63-75-2	3	-	-	-	2.57946e+07	1.26085e+07	3.79474e+07	2.30187e+07	4.44445e+07	2.36785e+07	1.77732e+07	1.93607e+07	2.09262e+07	1.82204e+07	3.7697e+07	5.1438e+07	C10129	-	C10129	-
MWStz054	UPLC-MS/MS	152.11	91.06	-	-	151.1	C9H13NO	[M+H]+	2,4,6,6-Tetramethyl-3(6H)-pyridinone	2,4,6,6-四甲基-3(6H)-吡啶酮	Alkaloids	生物碱	Pyridine alkaloids	吡啶类生物碱	203524-64-5	3	-	-	-	8516.36	8516.36	8516.36	8516.36	8516.36	8516.36	150542	150923	148557	50909	46256.3	42581.8	-	-	-	-
mws0943	UPLC-MS/MS	151.05	71.01	-	-	152.059	C7H8N2O2	[M-H]-	1,4-Dihydro-1-Methyl-4-oxo-3-pyridinecarboxamide	1,4-二氢-1-甲基-4-氧代-3-吡啶甲酰胺	Alkaloids	生物碱	Pyridine alkaloids	吡啶类生物碱	769-49-3	3	-	-	-	47731.2	55394.6	44644.1	8928.82	8928.82	8928.82	223409	235312	214854	61869.6	63278.4	76072.2	C05843	ko00760,ko01100	C05843	-
MWS3270	UPLC-MS/MS	166.02	79.96	-	-	167.022	C7H5NO4	[M-H]-	Quinolinic Acid	喹啉酸	Alkaloids	生物碱	Pyridine alkaloids	吡啶类生物碱	89-00-9	3	-	-	-	43126.5	40090.8	61750.1	43735.4	41397	49392.6	77173.8	88290	91132.5	73454.9	65291.7	74193.7	C03722	ko00380,ko00410,ko00760,ko01100,ko01240	C03722	-
MWSmce157	UPLC-MS/MS	144.1	58.06	-	-	143.095	C7H13NO2	[M+H]+	Stachydrine	水苏碱	Alkaloids	生物碱	Pyrrole alkaloids	吡咯类生物碱	471-87-4	1	-	-	-	2.04862e+06	2.15425e+06	2.27487e+06	2.08167e+07	2.12609e+07	2.17951e+07	1.92166e+07	1.80597e+07	1.81319e+07	1.686e+07	1.74245e+07	1.72054e+07	C10172	-	C10172	-
Wmzn000543	UPLC-MS/MS	549.271	489.249	-	-	550.278	C29H42O10	[M-H]-	Ajugamarin E3*	筋骨草素 E3*	Terpenoids	萜类	Ditepenoids	二萜	123297-96-1	3	-	-	-	8.35204e+07	8.94997e+07	7.33268e+07	4.56746e+06	5.01613e+06	5.75421e+06	1.53391e+06	1.54742e+06	1.46127e+06	2.25021e+07	2.2355e+07	1.7798e+07	-	-	-	-
Zmsp000758	UPLC-MS/MS	158.12	70.07	-	-	158.117	C8H15NO2	[M+H]+	1-(Hydroxymethyl)hexahydro-1h-pyrrolizin-2-ol	1-(羟甲基)六氢-1h-吡咯嗪-2-醇	Alkaloids	生物碱	Pyrrole alkaloids	吡咯类生物碱	-	2	-	-	-	657924	748072	642898	588487	661151	700834	900189	998456	1.04675e+06	829812	768854	841004	-	-	-	-
MWStz073	UPLC-MS/MS	102.05	84.05	-	-	101.048	C4H7NO2	[M+H]+	5-Hydroxy-2-pyrrolidinone	5-羟基-2-吡咯烷酮	Alkaloids	生物碱	Pyrrole alkaloids	吡咯类生物碱	62312-55-4	2	-	-	-	302230	318695	314293	75410	125707	92132.3	175860	165088	187360	171701	166562	164066	-	-	-	-
Yacp000453	UPLC-MS/MS	116.07	70.06	-	-	115.063	C5H9NO2	[M+H]+	3-hydroxy-1-methylpyrrolidin-2-one*	3-羟基-1-甲基吡咯烷-2-酮*	Alkaloids	生物碱	Pyrrole alkaloids	吡咯类生物碱	132996-63-5	2	-	-	-	4.04705e+06	4.8068e+06	4.89414e+06	1.1573e+07	1.25926e+07	1.29749e+07	3.54578e+06	3.24565e+06	3.12158e+06	3.45674e+06	9.00609e+06	6.63075e+06	-	-	-	-
MWStz040	UPLC-MS/MS	116.07	70.07	-	-	115.063	C5H9NO2	[M+H]+	Pterolactam*	蕨内酰胺*	Alkaloids	生物碱	Pyrrole alkaloids	吡咯类生物碱	38072-88-7	2	-	-	-	5.79101e+06	5.46787e+06	5.56483e+06	9.58947e+06	1.00029e+07	1.00124e+07	3.54229e+06	3.46164e+06	3.24427e+06	6.09789e+06	7.38243e+06	7.09231e+06	-	-	-	-
Hmcp001105	UPLC-MS/MS	200.17	140.14	-	-	199.157	C11H21NO2	[M+H]+	5-(2-Hydroxypropyl)hygrine	5-(2-羟丙基)古豆碱	Alkaloids	生物碱	Pyrrole alkaloids	吡咯类生物碱	-	3	-	-	-	43796.4	47654.7	66657	266743	306893	329807	357792	373395	277450	256820	275319	273600	-	-	-	-
MWSslk106	UPLC-MS/MS	122.1	105.07	-	-	121.089	C8H11N	[M+H]+	2-Phenylethylamine	2-苯乙胺	Alkaloids	生物碱	Benzylphenylethylamine alkaloids	苄基苯乙胺类生物碱	156-28-5	3	-	-	-	155755	174369	170994	95160.2	73457.5	60681.6	1.40752e+06	1.37715e+06	1.24914e+06	559964	683943	585636	C05332	ko00360,ko01100	C05332	-
Zmpn002440	UPLC-MS/MS	287.06	135.05	-	-	288.063	C15H12O6	[M-H]-	3,4,2',4',6'-Pentahydroxychalcone	3,4,2',4',6'-五羟基查耳酮	Flavonoids	黄酮	Chalcones	查耳酮	73692-51-0	2	-	-	-	311708	282009	245308	162171	139454	195958	368175	339510	310341	273849	246719	300315	C15525	ko00941,ko01100,ko01110	C15525	-
mws2118	UPLC-MS/MS	435.13	167.04	-	-	436.137	C21H24O10	[M-H]-	Phloretin-2'-O-glucoside (Phlorizin)	根皮苷	Flavonoids	黄酮	Chalcones	查耳酮	60-81-1	3	-	-	-	78656.6	90030.1	41699.9	51704.6	59707.4	63437.1	4021.82	4021.82	4021.82	22980.6	20109.1	28434.7	C01604	ko00941,ko01110	C01604	-
Lasp002993	UPLC-MS/MS	487.19	325.14	-	-	486.189	C26H30O9	[M+H]+	Isobavachalcone glucoside	异补骨脂素葡萄糖苷	Flavonoids	黄酮	Chalcones	查耳酮	-	1	-	-	-	732543	579863	759996	580973	426253	435013	335133	275395	315929	347359	444523	364724	-	-	-	-
Lmjp003722	UPLC-MS/MS	375.14	221.08	-	-	374.137	C20H22O7	[M+H]+	2'-Hydroxy-3,4,5,4',6'-pentamethoxychalcone	2'-羟基-3,4,5,4'6'-五甲氧基查耳酮	Flavonoids	黄酮	Chalcones	查耳酮	-	2	-	-	-	395014	340925	378358	54627.6	57105.8	74292.9	68146.8	48206.5	109835	802687	640307	657447	-	-	-	-
Xmgp006913	UPLC-MS/MS	341.14	137.06	-	-	340.131	C20H20O5	[M+H]+	2,4,2',4'-tetrahydroxy-3'-prenylchalcone	2,4,2',4'-四羟基-3'-异戊烯基查耳酮	Flavonoids	黄酮	Chalcones	查耳酮	-	3	-	-	-	1.51508e+06	1.18451e+06	1.30466e+06	2.82003e+06	3.54249e+06	2.84999e+06	799076	712250	847121	1.24116e+06	1.31711e+06	1.54767e+06	-	-	-	-
Wcfp003437	UPLC-MS/MS	325.14	175.07	-	-	324.136	C20H20O4	[M+H]+	3-Prenyl-4,2',4'-Trihydroxychalcone	3-异戊二烯基-4,2',4'-三羟基查耳酮	Flavonoids	黄酮	Chalcones	查耳酮	202815-28-9	2	-	-	-	1.21114e+07	8.17843e+06	1.19143e+07	1.22793e+07	1.69515e+07	1.49915e+07	4.13005e+06	4.35898e+06	5.14124e+06	6.81523e+06	1.16379e+07	6.9373e+06	-	-	-	-
MWSslk101	UPLC-MS/MS	225.09	147.05	-	-	224.084	C15H12O2	[M+H]+	4-Hydroxychalcone	4-羟基查耳酮	Flavonoids	黄酮	Chalcones	查耳酮	20426-12-4	3	-	-	-	481464	432739	488253	95655	102263	113651	53601.8	33941	64844.4	201444	153710	138072	C14231	-	C14231	-
pme2960	UPLC-MS/MS	273.08	153.02	-	-	272.068	C15H12O5	[M+H]+	Naringenin chalcone; 2',4,4',6'-Tetrahydroxychalcone	柚皮素查耳酮	Flavonoids	黄酮	Chalcones	查耳酮	73692-50-9	3	-	-	-	935025	905579	971335	630522	706684	734015	1.039e+06	1.02014e+06	1.01477e+06	1.15174e+06	1.07419e+06	1.0197e+06	C06561	ko00941,ko01100,ko01110	C06561	-
Hmlp006426	UPLC-MS/MS	303.12	167.07	-	-	302.115	C17H18O5	[M+H]+	4,4'-dihydroxy-2,6-dimethoxydihydrochalcone	4,4'-二羟基-2,6-二甲氧基二氢查耳酮	Flavonoids	黄酮	Chalcones	查耳酮	151752-08-8	3	-	-	-	7618.02	7618.02	7618.02	46706.1	38090.1	38323	4.60957e+06	3.99749e+06	4.34303e+06	2.29831e+06	2.12002e+06	1.81095e+06	-	-	-	-
pmn001716	UPLC-MS/MS	447.09	285.04	-	-	448.101	C21H20O11	[M-H]-	Carthamone*	醌式红花苷*	Flavonoids	黄酮	Chalcones	查耳酮	86579-00-2	2	-	-	-	45442	55769.4	50116.7	737452	1.02404e+06	1.06249e+06	1.61535e+07	1.97754e+07	1.76391e+07	1.09686e+07	1.3122e+07	7.71327e+06	C08598	-	C08598	-
Jmzn006005	UPLC-MS/MS	177.06	117.04	-	-	178.063	C10H10O3	[M-H]-	3,4-methylenedioxy cinnamyl alcohol	3,4-亚甲二氧基肉桂醇	Others	其它类	Alcohol compounds	醇类化合物	58095-76-4	1	-	-	-	84929.3	75943.3	68969.2	45346.8	49238	46228.8	1.62962e+06	1.39487e+06	1.46976e+06	440680	491978	432529	-	-	-	-
Lasp003143	UPLC-MS/MS	193.09	105.07	-	-	192.078	C11H12O3	[M+H]+	1,4-Benzodioxin-6-propanol	1,4-苯并二噁烷-6-丙醇	Others	其它类	Alcohol compounds	醇类化合物	-	1	-	-	-	1.0806e+06	999750	1.16205e+06	671814	703076	572015	884859	811267	936690	903603	880990	747372	-	-	-	-
pmf0174	UPLC-MS/MS	157.16	157.16	-	-	158.167	C10H22O	[M-H]-	1-Decanol*	1-癸醇*	Others	其它类	Alcohol compounds	醇类化合物	112-30-1	3	-	-	-	2.54302e+06	2.76353e+06	2.32107e+06	1.91236e+06	2.71314e+06	2.64874e+06	2.3705e+06	2.38713e+06	2.26052e+06	2.23586e+06	2.31417e+06	2.2964e+06	C01633	-	C01633	-
pmn001380	UPLC-MS/MS	187.1	169.09	-	-	188.105	C9H16O4	[M-H]-	Eucommiol	杜仲醇	Others	其它类	Alcohol compounds	醇类化合物	55930-44-4	3	-	-	-	1.26218e+06	1.36208e+06	1.20825e+06	279533	278954	253364	61255.5	50554	58367.8	501361	463906	453343	C17878	-	C17878	-
pmf0348	UPLC-MS/MS	187.13	97.06	-	-	188.141	C10H20O3	[M-H]-	2,6-Dimethyl-7-octene-2,3,6-triol	2,6-二甲基-7-辛烯-2,3,6-三醇	Others	其它类	Alcohol compounds	醇类化合物	73815-21-1	3	-	-	-	1.34824e+06	1.41749e+06	1.13656e+06	282910	251258	285991	76070.1	56381.9	73208.2	463930	533171	452381	-	-	-	-
pmf0175	UPLC-MS/MS	157.16	157.16	-	-	158.167	C10H22O	[M-H]-	2-Decanol*	2-癸醇*	Others	其它类	Alcohol compounds	醇类化合物	1120-06-5	3	-	-	-	2.49489e+06	2.73892e+06	2.31282e+06	2.54839e+06	2.54046e+06	2.59481e+06	2.46054e+06	2.17224e+06	2.29638e+06	2.26647e+06	2.19355e+06	2.0172e+06	-	-	-	-
pme1261	UPLC-MS/MS	206.14	76.08	-	-	205.131	C9H19NO4	[M+H]+	D-Panthenol	D-泛酰醇	Others	其它类	Alcohol compounds	醇类化合物	81-13-0	3	-	-	-	1.00628e+06	1.22117e+06	1.00616e+06	335880	457801	378678	79080.6	57077.5	79100.9	435160	428779	466310	C05944	ko00770	C05944	-
Lmhp007045	UPLC-MS/MS	301.07	258.05	-	-	300.063	C16H12O6	[M+H]+	Knoxiadin	红大戟素	Quinones	醌类	Anthraquinone	蒽醌	98873-77-9	1	-	-	-	3300.35	3300.35	3300.35	20185	16501.7	18376.6	872190	862910	855605	328346	321812	347573	-	-	-	-
Wbjp004122	UPLC-MS/MS	755.24	285.08	-	-	754.232	C34H42O19	[M+H]+	peganoneⅠ-Diglucose-Rhamnose	骆驼蓬蒽醌Ⅰ-二葡萄糖鼠李糖	Quinones	醌类	Anthraquinone	蒽醌	-	2	-	-	-	53492.5	38130.1	48383.8	7626.02	7626.02	7626.02	150085	207941	233460	95600.1	75589.8	112526	-	-	-	-
Wbjp004531	UPLC-MS/MS	593.19	285.08	-	-	592.179	C28H32O14	[M+H]+	peganoneⅠ-glucose-Rhamnose	骆驼蓬蒽醌Ⅰ-葡萄糖鼠李糖	Quinones	醌类	Anthraquinone	蒽醌	-	2	-	-	-	41523.3	41523.3	41523.3	207616	212433	259784	1.08354e+07	1.04459e+07	1.16171e+07	5.18511e+06	5.75382e+06	5.41723e+06	-	-	-	-
Lmsp102218	UPLC-MS/MS	285.08	211.08	-	-	284.068	C16H12O5	[M+H]+	Physcion	大黄素-3-甲醚	Quinones	醌类	Anthraquinone	蒽醌	521-61-9	2	-	-	-	252061	309138	233127	16106.7	16106.7	16106.7	16106.7	16106.7	16106.7	98241.3	89934.4	80533.7	C17045	-	C17045	-
MWSslk078	UPLC-MS/MS	241.05	121.03	-	-	240.042	C14H8O4	[M+H]+	2,6-Dihydroxyanthraquinone	2,6-二羟基蒽醌	Quinones	醌类	Anthraquinone	蒽醌	84-60-6	3	-	-	-	756229	802743	857560	1.09184e+06	1.05977e+06	1.12039e+06	119392	119392	119392	1.00052e+06	757718	596960	C14267	-	C14267	-
pmf0595	UPLC-MS/MS	331.08	270.05	-	-	330.074	C17H14O7	[M+H]+	Aurantio-obtusin	橙黄决明素	Quinones	醌类	Anthraquinone	蒽醌	67979-25-3	3	-	-	-	147450	199625	173039	343855	399001	386207	1.47821e+06	1.45155e+06	1.2913e+06	762232	724621	839911	C17670	-	C17670	-
pmp000600	UPLC-MS/MS	345.1	312.06	-	-	344.09	C18H16O7	[M+H]+	Obtusin	决明素	Quinones	醌类	Anthraquinone	蒽醌	70588-05-5	3	-	-	-	19184.8	21860.4	12234.2	283010	285336	301762	1.37153e+06	1.31756e+06	1.35247e+06	805984	940107	888839	C17040	-	C17040	-
Zbn009590	UPLC-MS/MS	313.07	270.06	-	-	314.081	C17H14O6	[M-H]-	5,15-O-Dimethyl morindol	5,15-O-二甲基吗啉	Quinones	醌类	Anthraquinone	蒽醌	-	1	-	-	-	75371.4	89633.9	76818	795895	893471	895509	2.04785e+07	2.1047e+07	2.14395e+07	1.05504e+07	1.13531e+07	8.86984e+06	-	-	-	-
Zmhn003269	UPLC-MS/MS	299.02	255.03	-	-	300.027	C15H8O7	[M-H]-	6-Hydroxyrhein	6-羟基大黄酸	Quinones	醌类	Anthraquinone	蒽醌	-	2	-	-	-	79866.3	84447.8	66110.3	92285.6	68327.5	81637.4	637799	647566	612888	319392	484235	390548	-	-	-	-
Zbn010259	UPLC-MS/MS	329.07	314.05	-	-	330.074	C17H14O7	[M-H]-	1,5,7-trihydroxy-6-methoxy-2-methoxymethylanthraquinone	1,5,7-三羟基-6-甲氧基-2-甲氧基甲基蒽醌	Quinones	醌类	Anthraquinone	蒽醌	-	2	-	-	-	1.11805e+06	906788	1.16942e+06	259612	298133	303427	332298	688527	691761	648984	633189	549723	-	-	-	-
Zmdn006903	UPLC-MS/MS	283.06	240.04	-	-	284.068	C16H12O5	[M-H]-	6-Methylaloe emodin	6-甲基-芦荟大黄素	Quinones	醌类	Anthraquinone	蒽醌	-	3	-	-	-	2304.26	2304.26	2304.26	11521.3	14809.9	13821.2	2.73206e+06	2.68663e+06	2.65041e+06	1.00966e+06	1.08633e+06	951830	-	-	-	-
pmn001336	UPLC-MS/MS	431.1	269	-	-	432.106	C21H20O10	[M-H]-	Aloeemodin-8-O-glucoside	芦荟大黄素-8-O-葡萄糖苷	Quinones	醌类	Anthraquinone	蒽醌	-	3	-	-	-	48970.9	48970.9	48970.9	244855	285817	294683	7.32342e+06	9.01864e+06	7.03814e+06	5.59036e+06	5.09486e+06	5.15342e+06	-	-	-	-
pmn001340	UPLC-MS/MS	473.11	311.1	-	-	474.116	C23H22O11	[M-H]-	Emodin-8-O-(6''-O-acetyl)glucoside	大黄素-8-O-(6''-O-乙酰)葡萄糖苷	Quinones	醌类	Anthraquinone	蒽醌	-	3	-	-	-	11406	11406	11406	11406	11406	11406	133674	137525	144024	84380.8	79844.3	57030.1	-	-	-	-
Zmdn005578	UPLC-MS/MS	517.1	269.05	-	-	518.106	C24H22O13	[M-H]-	Emodin-8-O-(6'-O-malonyl)-beta-D-glucopyranoside	大黄素-8-O-(6'-O-丙二酰)-葡萄糖苷	Quinones	醌类	Anthraquinone	蒽醌	-	3	-	-	-	173468	135334	177538	157348	205243	249700	697945	425591	661367	354276	398226	264367	-	-	-	-
Zmhn001905	UPLC-MS/MS	447.09	285.04	-	-	448.101	C21H20O11	[M-H]-	HydroxyAloe-emodin-8-O-glucoside	羟基芦荟大黄素-8-O-葡萄糖苷	Quinones	醌类	Anthraquinone	蒽醌	-	3	-	-	-	135674	173352	127306	575563	784108	669061	8.46661e+06	7.61786e+06	7.21538e+06	7.53957e+06	5.67588e+06	5.3505e+06	-	-	-	-
Zmdn006929	UPLC-MS/MS	255.07	213.06	-	-	256.074	C15H12O4	[M-H]-	Aloe-Emodin-9-Anthrone	芦荟大黄素-9-蒽酮	Quinones	醌类	Anthraquinone	蒽醌	6247-99-0	2	-	-	-	84504.2	106374	71344	101762	107690	124813	129227	128936	138862	113720	115408	100275	C16760	-	C16760	-
Wmhn008845	UPLC-MS/MS	299.06	256.04	-	-	300.063	C16H12O6	[M-H]-	Questinol	ω-羟基大黄素-8-甲醚	Quinones	醌类	Anthraquinone	蒽醌	35688-09-6	2	-	-	-	16354.8	16354.8	16354.8	102579	81773.8	115907	8.71915e+06	8.37776e+06	8.3134e+06	2.45377e+06	2.65032e+06	2.32425e+06	C17811	-	C17811	-
Zbqn005083	UPLC-MS/MS	563.14	269.04	-	-	564.148	C26H28O14	[M-H]-	Lucidin primeveroside	芦西定茜草樱草糖苷	Quinones	醌类	Anthraquinone	蒽醌	29706-59-0	2	-	-	-	10950.4	4691.5	15169.5	681906	638148	691632	1.83209e+07	1.8571e+07	1.55672e+07	1.21775e+07	1.0646e+07	1.06042e+07	-	-	-	-
pmn001338	UPLC-MS/MS	445.08	283	-	-	446.085	C21H18O11	[M-H]-	Rhein-8-O-glucoside	大黄酸-8-O-葡萄糖苷	Quinones	醌类	Anthraquinone	蒽醌	34298-86-7	3	-	-	-	3.04408e+06	3.12291e+06	2.94589e+06	550822	576549	520070	402223	336107	376685	1.04672e+06	1.09831e+06	988196	-	-	-	-
Zbnn006442	UPLC-MS/MS	287.05	135.04	-	-	288.063	C15H12O6	[M-H]-	Eriodictyol (5,7,3',4'-Tetrahydroxyflavanone)	圣草酚	Flavonoids	黄酮	Flavanones	二氢黄酮	552-58-9	1	-	-	-	100619	140114	108074	91177	64779	78599.8	164128	152810	131306	91177	147779	100631	C05631	ko00941,ko01100,ko01110	C05631	-
mws1034	UPLC-MS/MS	287.09	153.02	-	-	286.084	C16H14O5	[M+H]+	Isosakuranetin (5,7-Dihydroxy-4'-methoxyflavanone)	异樱花素	Flavonoids	黄酮	Flavanones	二氢黄酮	480-43-3	3	-	-	-	435168	473165	442410	3.037e+06	2.78528e+06	3.07849e+06	7.65648e+06	7.83937e+06	7.66746e+06	5.52484e+06	4.94963e+06	4.74799e+06	C05334	ko00941,ko01110	C05334	-
pme0376	UPLC-MS/MS	271.06	151	-	-	272.068	C15H12O5	[M-H]-	Naringenin (5,7,4'-Trihydroxyflavanone)*	柚皮素*	Flavonoids	黄酮	Flavanones	二氢黄酮	480-41-1	1	-	-	-	1.18916e+06	1.31268e+06	1.04056e+06	964170	1.11563e+06	922004	1.00197e+06	1.01142e+06	978824	1.09504e+06	1.07348e+06	931326	C00509	ko00941,ko00943,ko01100,ko01110	C00509	-
mws0057	UPLC-MS/MS	451.12	289.07	-	-	450.116	C21H22O11	[M+H]+	Eriodictyol-7-O-glucoside*	圣草酚-7-O-葡萄糖苷*	Flavonoids	黄酮	Flavanones	二氢黄酮	38965-51-4	3	-	-	-	30047.1	33965.1	7337.5	166203	141056	186321	2.99989e+06	2.10941e+06	2.56377e+06	1.15955e+06	1.22502e+06	1.30685e+06	-	-	-	-
MWSHY0089	UPLC-MS/MS	287.09	167.03	-	-	286.084	C16H14O5	[M+H]+	5,4'-Dihydroxy-7-methoxyflavanone (Sakuranetin)*	5,4'-二羟基-7-甲氧基黄烷酮 (樱花素)*	Flavonoids	黄酮	Flavanones	二氢黄酮	2957-21-3	1	-	-	-	98593.3	117861	89445.1	1.56867e+06	1.77945e+06	1.83493e+06	8.35244e+07	8.4177e+07	7.92525e+07	5.01497e+07	6.08971e+07	6.13318e+07	C09833	ko00941,ko01110	C09833	MetMap110
Lmgp009246	UPLC-MS/MS	331.12	167.03	-	-	330.11	C18H18O6	[M+H]+	5-Hydroxy-7,3',4'-trimethoxyflavanone	5-羟基-7,3',4'-三甲氧基二氢黄酮	Flavonoids	黄酮	Flavanones	二氢黄酮	-	1	-	-	-	354855	321291	333702	3.13457e+07	3.1151e+07	3.15651e+07	1.12834e+08	1.14627e+08	1.10901e+08	9.60921e+07	9.77692e+07	9.49952e+07	-	-	-	-
Cmsp006026	UPLC-MS/MS	319.08	167.03	-	-	318.074	C16H14O7	[M+H]+	Dihydrorhamnetin	二氢鼠李素	Flavonoids	黄酮	Flavanones	二氢黄酮	-	1	-	-	-	22543.4	12906.7	25203.7	992759	964525	1.09679e+06	8.55838e+06	7.05956e+06	8.20671e+06	4.12528e+06	4.06093e+06	4.16902e+06	-	-	-	-
Lmgp008448	UPLC-MS/MS	317.1	167.03	-	-	316.095	C17H16O6	[M+H]+	5,4'-Dihydroxy-7,3'-dimethoxyflavanone	5,4'-二羟基-7,3'-二甲氧基二氢黄酮	Flavonoids	黄酮	Flavanones	二氢黄酮	66568-98-7	1	-	-	-	16729.6	16729.6	16729.6	83648.1	106373	113167	2.01107e+06	1.79229e+06	1.79047e+06	1.1473e+06	1.29262e+06	1.08501e+06	-	-	-	-
Zmap007870	UPLC-MS/MS	303.09	167.03	-	-	302.079	C16H14O6	[M+H]+	Blumeatin	艾纳香素	Flavonoids	黄酮	Flavanones	二氢黄酮	118024-26-3	1	-	-	-	339586	285489	248965	4.09377e+06	3.86313e+06	4.22229e+06	3.81418e+07	3.98957e+07	3.94759e+07	2.00281e+07	1.9397e+07	2.13759e+07	-	-	-	-
Lmsp008443	UPLC-MS/MS	333.1	167.03	-	-	332.09	C17H16O7	[M+H]+	3,3',5-Trihydroxy-4',7-dimethoxyflavanone	3,3',5-三羟基-4',7-二甲氧基黄烷酮	Flavonoids	黄酮	Flavanones	二氢黄酮	-	1	-	-	-	148477	148477	148477	773699	742383	770752	3.75055e+07	4.23034e+07	4.03939e+07	2.12046e+07	1.99083e+07	2.01826e+07	-	-	-	-
Lmgp010081	UPLC-MS/MS	301.11	167.03	-	-	300.1	C17H16O5	[M+H]+	5-Hydroxy-7,4'-dimethoxyflavanone	5-羟基-7,4'-二甲氧基二氢黄酮	Flavonoids	黄酮	Flavanones	二氢黄酮	-	1	-	-	-	316758	279539	277650	6.32121e+06	6.27497e+06	6.7009e+06	2.88838e+07	2.79953e+07	3.03656e+07	1.75672e+07	1.79415e+07	1.83188e+07	-	-	-	-
Lahp003481	UPLC-MS/MS	583.16	289.07	-	-	582.159	C26H30O15	[M+H]+	Eriodictyol apiosyl glucoside	圣草酚芹糖基葡萄糖苷	Flavonoids	黄酮	Flavanones	二氢黄酮	-	2	-	-	-	45044	45044	45044	268576	225220	299935	1.18765e+06	1.08286e+06	1.04311e+06	596321	429958	420322	-	-	-	-
Labp005025	UPLC-MS/MS	535.14	287.09	-	-	534.137	C25H26O13	[M+H]+	Malonyl isoSakuranin	丙二酰异樱花苷	Flavonoids	黄酮	Flavanones	二氢黄酮	-	2	-	-	-	248575	62799.3	122843	1.23267e+06	1.64574e+06	1.62794e+06	5.25059e+06	4.78622e+06	5.22585e+06	2.27684e+06	1.96645e+06	2.16513e+06	-	-	-	-
Lmsp004301	UPLC-MS/MS	451.12	289.07	-	-	450.116	C21H22O11	[M+H]+	3',5,5',7-Tetrahydroxyflavanone-7-O-glucoside*	3',5,5',7-四羟基黄烷酮-7-O-β-D-葡萄糖苷*	Flavonoids	黄酮	Flavanones	二氢黄酮	-	3	-	-	-	54859.8	180611	35269.8	189380	350200	309134	2.02431e+06	2.33252e+06	1.89061e+06	1.0422e+06	990736	1.03697e+06	-	-	-	-
Lmsp009245	UPLC-MS/MS	347.11	197.05	-	-	346.105	C18H18O7	[M+H]+	3',5-Dihydroxy-4',6,7-Trimethoxyflavanone	3',5-二羟基-4',6,7-三甲氧基黄烷酮	Flavonoids	黄酮	Flavanones	二氢黄酮	-	3	-	-	-	3477.26	3477.26	3477.26	17386.3	19856.8	17907.5	336483	334533	323671	168885	166890	126892	-	-	-	-
Lmsp010098	UPLC-MS/MS	361.13	197.06	-	-	360.121	C19H20O7	[M+H]+	5-Hydroxy-6,7,3',4'-tetramethoxyflavanone	5-羟基-6,7,3',4'-四甲氧基黄烷酮	Flavonoids	黄酮	Flavanones	二氢黄酮	-	3	-	-	-	2675	2675	2675	13375	14544.6	13611.8	78059.4	86201.5	91467.7	48863.8	46456.4	35633.1	-	-	-	-
Lmjp005108	UPLC-MS/MS	375.14	221.08	-	-	374.137	C20H22O7	[M+H]+	6,7,8,3',4'-Pentamethoxyflavanone	6,7,8,3',4'-五甲氧基二氢黄酮	Flavonoids	黄酮	Flavanones	二氢黄酮	-	3	-	-	-	862419	765105	772658	568296	665127	614926	34087.1	34087.1	34087.1	170436	234229	232175	-	-	-	-
HJAP020	UPLC-MS/MS	613.15	289.07	-	-	612.169	C27H32O16	[M+H]+	Eriodictyol-5,3'-Di-O-glucoside	圣草酚-5,3'-二-O-葡萄糖苷	Flavonoids	黄酮	Flavanones	二氢黄酮	-	3	-	-	-	584883	450194	669894	81618.2	80380	103384	173494	130538	145651	210336	204234	145363	-	-	-	-
pma0791	UPLC-MS/MS	521.13	273.08	-	-	520.122	C24H24O13	[M+H]+	Naringenin-7-O-(6''-malonyl)glucoside	柚皮素-7-O-(6''-丙二酰)葡萄糖苷	Flavonoids	黄酮	Flavanones	二氢黄酮	-	3	-	-	-	96822.2	134869	103311	186923	227145	227901	322614	309106	302067	190053	243673	219108	-	-	-	-
HJAP135	UPLC-MS/MS	505.12	257.08	-	-	504.127	C24H24O12	[M+H]+	Pinocembrin-7-O-(6''-O-malonyl)glucoside	乔松素-7-O-(6''-O-丙二酰)葡萄糖苷	Flavonoids	黄酮	Flavanones	二氢黄酮	-	3	-	-	-	229063	235131	305565	12683.5	12683.5	12683.5	12683.5	12683.5	12683.5	92231.1	66869.4	63417.6	-	-	CM00908	MetMap110
mws1175	UPLC-MS/MS	271.1	167.03	-	-	270.089	C16H14O4	[M+H]+	Pinostrobin	球松素	Flavonoids	黄酮	Flavanones	二氢黄酮	480-37-5	2	-	-	-	4670.93	4670.93	4670.93	35579.2	23471	23354.7	337666	322382	319195	150375	172433	134461	C16419	ko00941	C16419	-
Lmsp009013	UPLC-MS/MS	317.1	197.05	-	-	316.095	C17H16O6	[M+H]+	4',6-Dihydroxy-5,7-dimethoxyflavanone*	4',6-二羟基-5,7-二甲氧基黄烷酮*	Flavonoids	黄酮	Flavanones	二氢黄酮	6951-57-1	3	-	-	-	5590.12	5590.12	5590.12	5590.12	5590.12	5590.12	74745.2	79611.8	78102.6	40453.1	47648.3	27950.6	C14969	-	C14969	-
MWSHY0092	UPLC-MS/MS	597.18	289.07	-	-	596.174	C27H32O15	[M+H]+	Eriodictyol-7-O-Rutinoside (Eriocitrin)	圣草次苷	Flavonoids	黄酮	Flavanones	二氢黄酮	13463-28-0	3	-	-	-	422268	396092	262523	110777	114706	123212	716853	814939	522753	402244	433427	492763	C09732	-	C09732	-
MWSHY0019	UPLC-MS/MS	611.2	303.09	-	-	610.19	C28H34O15	[M+H]+	Hesperetin-7-O-neohesperidoside(Neohesperidin)	橙皮素-7-O-新橙皮糖苷 (新橙皮苷)	Flavonoids	黄酮	Flavanones	二氢黄酮	13241-33-3	3	-	-	-	34105.7	37326.8	42912.5	63641	60717.8	66490.8	1.91226e+06	1.63255e+06	1.93619e+06	450276	409270	375363	C09806	ko00941	C09806	-
mws1033	UPLC-MS/MS	303.09	153.02	-	-	302.079	C16H14O6	[M+H]+	Homoeriodictyol	高圣草酚	Flavonoids	黄酮	Flavanones	二氢黄酮	446-71-9	3	-	-	-	17283.5	17283.5	17283.5	89130.9	92503.6	86417.6	203753	208385	227044	127921	137826	134674	C09756	ko00941	C09756	-
MWSmce366	UPLC-MS/MS	453.23	179.04	-	-	452.22	C27H32O6	[M+H]+	2'-Methoxykurarinone	2'-甲氧基苦参酮	Flavonoids	黄酮	Flavanones	二氢黄酮	270249-38-2	3	-	-	-	2327.81	2327.81	2327.81	2327.81	2327.81	2327.81	19751	21949.3	17913.9	11639.1	18289.7	17779.2	-	-	-	-
Cmsp008121	UPLC-MS/MS	287.092	167.034	-	-	286.084	C16H14O5	[M+H]+	7-O-Methylnaringenin*	7-甲基柚皮素*	Flavonoids	黄酮	Flavanones	二氢黄酮	-	1	-	-	-	113762	107893	83133.7	1.55841e+06	1.74689e+06	1.78373e+06	8.41368e+07	8.46567e+07	8.30183e+07	5.62183e+07	5.86873e+07	6.02787e+07	-	-	-	-
pmb0628	UPLC-MS/MS	613.18	451.1	-	-	612.169	C27H32O16	[M+H]+	Eriodictyol-8-C-glucoside-4'-O-glucoside	圣草酚-8-C-葡萄糖苷-4'-O-葡萄糖苷	Flavonoids	黄酮	Flavanones	二氢黄酮	-	3	-	-	-	4593.24	4593.24	4593.24	32631.4	34932	22966.2	72561.2	43034.6	113777	64092.5	59065.9	47251.2	-	-	-	-
HJN090	UPLC-MS/MS	433.11	271.06	-	-	434.121	C21H22O10	[M-H]-	Butin-7-O-glucoside*	紫铆素-7-O-葡萄糖苷*	Flavonoids	黄酮	Flavanones	二氢黄酮	-	3	-	-	-	130944	137797	118635	438963	364911	526915	636291	458860	551960	575321	403564	474449	-	-	-	-
Lmyn005006	UPLC-MS/MS	595.15	287.06	-	-	596.153	C30H28O13	[M-H]-	Eriodictyol-7-O-(6''-O-p-coumaroyl)glucoside	圣草酚-7-O-(6''-O-对香豆酰)葡萄糖苷	Flavonoids	黄酮	Flavanones	二氢黄酮	-	3	-	-	-	8387.17	8387.17	8387.17	47166.3	85216.7	48822.5	116966	79323.5	114344	94218.7	41935.8	57239.4	-	-	-	-
HJN087	UPLC-MS/MS	433.12	271.06	-	-	434.121	C21H22O10	[M-H]-	Naringenin-4'-O-glucoside*	柚皮素-4'-O-葡萄糖苷*	Flavonoids	黄酮	Flavanones	二氢黄酮	-	3	-	-	-	135239	123637	110876	399255	405694	494715	670650	493221	704076	567563	329284	512687	-	-	-	-
mws0789	UPLC-MS/MS	255.07	151	-	-	256.074	C15H12O4	[M-H]-	Pinocembrin (Dihydrochrysin)	乔松素 (二氢白杨素)	Flavonoids	黄酮	Flavanones	二氢黄酮	480-39-7	2	-	-	-	96164.1	124154	86945.1	110653	115922	128888	131860	149983	138534	127995	131399	122629	C09827	ko00941	C09827	MetMap110
mws0463	UPLC-MS/MS	301.07	164.01	-	-	302.079	C16H14O6	[M-H]-	Hesperetin	橙皮素	Flavonoids	黄酮	Flavanones	二氢黄酮	520-33-2	2	-	-	-	36710.9	37967.4	18049.5	70323.8	74863.2	72717.8	644514	597517	485882	305848	300595	248932	C01709	ko00941	C01709	-
mws1179	UPLC-MS/MS	433.11	271.07	-	-	434.121	C21H22O10	[M-H]-	Naringenin-7-O-glucoside (Prunin)	柚皮素-7-O-葡萄糖苷 (樱桃苷)	Flavonoids	黄酮	Flavanones	二氢黄酮	529-55-5	3	-	-	-	60946.1	51122.6	66530	267157	226144	197292	243882	293541	239410	271590	275878	207298	C09099	ko00941,ko01100	C09099	-
mws0046	UPLC-MS/MS	579.17	271.06	-	-	580.179	C27H32O14	[M-H]-	Naringenin-7-O-Neohesperidoside(Naringin)*	柚皮素-7-O-新橙皮糖苷(柚皮苷)*	Flavonoids	黄酮	Flavanones	二氢黄酮	10236-47-2	3	-	-	-	2913.8	14569	2913.8	2913.8	2913.8	17210.3	63075.8	72250.3	50413.5	55069.1	35555.8	51606.9	C09789	ko00941,ko01100	C09789	-
mws1066	UPLC-MS/MS	579.17	271.06	-	-	580.179	C27H32O14	[M-H]-	Naringenin-7-O-Rutinoside(Narirutin)*	柚皮素-7-O-芸香糖苷(芸香柚皮苷)*	Flavonoids	黄酮	Flavanones	二氢黄酮	14259-46-2	3	-	-	-	1237.18	20656.3	1237.18	10667.2	6185.91	15878	81424.8	81421.4	54997.7	28683.4	33264.8	27213.6	C09793	-	C09793	-
mws0791	UPLC-MS/MS	593.19	285.08	-	-	594.195	C28H34O14	[M-H]-	Poncirin (Isosakuranetin-7-O-neohesperidoside)*	枸橘苷*	Flavonoids	黄酮	Flavanones	二氢黄酮	14941-08-3	3	-	-	-	27901.5	33408.8	14677.2	476538	460595	483478	3.17363e+06	2.68669e+06	2.76174e+06	1.72281e+06	1.54655e+06	1.34298e+06	C09830	-	C09830	-
Smbn003459	UPLC-MS/MS	287.05	153.01	-	-	288.063	C15H12O6	[M-H]-	Carthamidin	红花素	Flavonoids	黄酮	Flavanones	二氢黄酮	479-54-9	3	-	-	-	5208.96	5208.96	5208.96	26044.8	5208.96	5208.96	117225	85376.6	64983.3	42390.1	43706.2	46864.4	-	-	-	-
pme1598	UPLC-MS/MS	463.12	301.07	-	-	464.132	C22H24O11	[M-H]-	Hesperetin-5-O-glucoside	橙皮素-5-O-葡萄糖苷	Flavonoids	黄酮	Flavanones	二氢黄酮	69651-80-5	3	-	-	-	224107	291864	238575	835703	1.27222e+06	1.16818e+06	4.49856e+06	4.33347e+06	4.27207e+06	3.68801e+06	2.67662e+06	2.40179e+06	-	-	-	-
mws1454	UPLC-MS/MS	477.14	315.09	-	-	478.147	C23H26O11	[M-H]-	Persicoside*	桃苷*	Flavonoids	黄酮	Flavanones	二氢黄酮	28978-03-2	2	-	-	-	48444.1	45452.1	18027.4	106284	123464	122342	595428	790213	653254	295486	422937	284354	-	-	-	-
pme1611	UPLC-MS/MS	433.114	313	-	-	434.121	C21H22O10	[M-H]-	Isohemiphloin	异柚葡萄糖苷	Flavonoids	黄酮	Flavanones	二氢黄酮	3682-02-8	3	-	-	-	31486	30831.3	73145.1	146720	221631	212719	389130	407528	351405	187469	264717	229407	-	-	-	-
Lmsn004132	UPLC-MS/MS	329.094	167.04	-	-	330.11	C18H18O6	[M-H]-	6-Hydroxy-4',5,7-trimethoxyflavanone; Hamiltone A	6-羟基-4',5,7-三甲氧基黄烷酮	Flavonoids	黄酮	Flavanones	二氢黄酮	6626-61-5	3	-	-	-	27857.4	27857.4	27857.4	168196	139287	362445	2.77784e+06	2.45309e+06	2.87681e+06	1.64415e+06	1.43849e+06	1.41506e+06	-	-	-	-
Jmgn004021	UPLC-MS/MS	449.109	269.05	-	-	450.116	C21H22O11	[M-H]-	6-C-Glucosyl-2-Hydroxynaringenin	6-碳葡萄糖基-2-羟基柚皮素	Flavonoids	黄酮	Flavanones	二氢黄酮	-	3	-	-	-	1.18152e+06	1.12374e+06	1.16349e+06	9.14567e+06	7.44201e+06	9.12507e+06	2.07715e+07	2.13679e+07	2.13418e+07	9.02233e+06	1.26672e+07	9.38092e+06	-	-	-	-
Lacn006274	UPLC-MS/MS	575.175	371.114	-	-	576.184	C28H32O13	[M-H]-	Acetyl Phellatin	乙酰去氢异黄柏苷	Flavonoids	黄酮	Flavanones	二氢黄酮	-	3	-	-	-	242169	242166	239394	150375	105388	191137	61895.8	51093.6	61940.5	81465	117382	99368.1	-	-	-	-
Ybnn006457	UPLC-MS/MS	301.069	151.003	-	-	302.079	C16H14O6	[M-H]-	Artocarpanone	桂木二氢黄素	Flavonoids	黄酮	Flavanones	二氢黄酮	-	3	-	-	-	8952.35	8952.35	8952.35	8952.35	8952.35	8952.35	49216.6	62901.9	63506.1	51414.4	44761.8	58073.5	-	-	-	-
Zbnn005420	UPLC-MS/MS	535.105	287.055	-	-	536.117	C24H24O14	[M-H]-	Eriodictyol-7-O-(6''-malonyl)glucoside	圣草酚-7-O-(6''-丙二酰)葡萄糖苷	Flavonoids	黄酮	Flavanones	二氢黄酮	-	3	-	-	-	50748.7	69047.4	65599.8	260366	285323	303543	1.6485e+06	1.63514e+06	1.60369e+06	978396	975113	880008	-	-	-	-
WaYn004793	UPLC-MS/MS	579.173	285.077	-	-	580.179	C27H32O14	[M-H]-	Isosakuranetin 7-Alpha-L-Arabinofuranosyl-(1→6)-Glucoside	异樱花素 7-α-L-阿拉伯呋喃糖基-(1→6)-葡糖苷	Flavonoids	黄酮	Flavanones	二氢黄酮	-	3	-	-	-	9301.47	18805.8	12812	140571	160317	130112	3.88671e+06	4.10408e+06	2.0852e+06	1.49348e+06	1.93891e+06	971158	-	-	-	-
WaYn005089	UPLC-MS/MS	447.13	285.077	-	-	448.137	C22H24O10	[M-H]-	Neosakuranin	新樱花苷	Flavonoids	黄酮	Flavanones	二氢黄酮	-	3	-	-	-	123729	150328	168339	995219	999482	1.38933e+06	2.00179e+07	2.02447e+07	1.52678e+07	1.49577e+07	1.3833e+07	9.99126e+06	-	-	-	-
Lmdp007354	UPLC-MS/MS	317.1	197.04	-	-	316.095	C17H16O6	[M+H]+	5,4'-Dihydroxy-7,8-dimethoxyflavanone*	5,4'-二羟基-7,8-二甲氧基黄烷酮*	Flavonoids	黄酮	Flavanones	二氢黄酮	-	3	-	-	-	2822.33	2822.33	2822.33	14111.7	19291.8	19564.6	88030.5	59991.8	82980	38237.6	40931.8	34379.2	-	-	-	-
Lmdp007889	UPLC-MS/MS	347.11	213.04	-	-	346.105	C18H18O7	[M+H]+	5,6-Dihydroxy-7,8,4'-trimethoxyflavanone	5,6-二羟基-7,8,4'-三甲氧基黄烷酮	Flavonoids	黄酮	Flavanones	二氢黄酮	-	3	-	-	-	10695.4	10695.4	10695.4	10695.4	10695.4	10695.4	124739	98824.4	108187	53476.8	56135.5	64438	-	-	-	-
MWSslk252	UPLC-MS/MS	593.19	285.08	-	-	594.195	C28H34O14	[M-H]-	Didymin (Isosakuranetin-7-O-rutinoside)*	香蜂草苷*	Flavonoids	黄酮	Flavanones	二氢黄酮	14259-47-3	3	-	-	-	8465.01	10577.7	13012.7	51392.5	66123.5	72753.5	502865	562198	462687	282942	310902	262658	-	-	-	-
pmp000531	UPLC-MS/MS	519.19	357.13	-	-	518.179	C26H30O11	[M+H]+	Phellamurin	黄柏苷	Flavonoids	黄酮	Flavanonols	二氢黄酮醇	52589-11-4	2	-	-	-	1.09272e+07	8.91591e+06	9.09128e+06	2.55825e+06	2.69603e+06	2.33201e+06	728071	575507	748730	3.91806e+06	3.46347e+06	3.77604e+06	C09808	-	C09808	MetMap114
Cmsp004086	UPLC-MS/MS	303.09	229.08	-	-	302.079	C16H14O6	[M+H]+	Dihydrokaempferide	二氢山柰素	Flavonoids	黄酮	Flavanonols	二氢黄酮醇	137225-59-3	3	-	-	-	7738.17	23931.1	18798.8	63207.6	30227.3	31480.9	317836	330858	447642	169759	183518	155635	-	-	CM00456	MetMap114
Lmlp005236	UPLC-MS/MS	451.12	289.08	-	-	450.116	C21H22O11	[M+H]+	Dihydrokaempferol-3-O-glucoside*	二氢山柰酚-3-O-葡萄糖苷*	Flavonoids	黄酮	Flavanonols	二氢黄酮醇	31049-08-8	3	-	-	-	57469.2	11493.8	11493.8	233783	381841	202685	3.99962e+06	2.91705e+06	3.12181e+06	1.45097e+06	2.10081e+06	1.75266e+06	-	-	CM00464	MetMap113,MetMap114
pmp000530	UPLC-MS/MS	519.19	357.13	-	-	518.179	C26H30O11	[M+H]+	Phellodendroside	黄柏环合苷	Flavonoids	黄酮	Flavanonols	二氢黄酮醇	40451-69-2	3	-	-	-	2.89906e+06	2.41664e+06	1.64806e+06	1.23407e+06	742774	1.20967e+06	309779	292969	467332	893055	992108	1.06688e+06	-	-	-	-
Lmmn004625	UPLC-MS/MS	449.11	287.06	-	-	450.116	C21H22O11	[M-H]-	Dihydrokaempferol-7-O-glucoside	二氢山柰酚-7-O-葡萄糖苷	Flavonoids	黄酮	Flavanonols	二氢黄酮醇	-	2	-	-	-	8250.98	41254.9	8250.98	114052	108064	103786	138005	141382	129350	96262	179261	84230	-	-	-	-
Lmtn002796	UPLC-MS/MS	449.11	287.06	-	-	450.116	C21H22O11	[M-H]-	Aromadendrin-7-O-glucoside	香橙素-7-O-葡萄糖苷	Flavonoids	黄酮	Flavanonols	二氢黄酮醇	28189-90-4	2	-	-	-	6575.72	32878.6	6575.72	595286	581766	461769	508578	422656	466218	471090	474006	495250	-	-	CM00465	MetMap114
mws0044	UPLC-MS/MS	303.05	125.02	-	-	304.058	C15H12O7	[M-H]-	Taxifolin(Dihydroquercetin)	花旗松素(二氢槲皮素)	Flavonoids	黄酮	Flavanonols	二氢黄酮醇	480-18-2	3	-	-	-	405539	596607	442986	206982	173878	204935	1.52123e+06	863399	1.40309e+06	565950	894529	880275	C01617	ko00941,ko01100,ko01110	C01617	-
mws0914	UPLC-MS/MS	271.061	151.003	-	-	272.068	C15H12O5	[M-H]-	3,5,7-Trihydroxyflavanone (Pinobanksin)*	3,5,7-三羟基黄烷酮 (短叶松素)*	Flavonoids	黄酮	Flavanonols	二氢黄酮醇	548-82-3	1	-	-	-	1.14082e+06	1.16307e+06	1.07241e+06	914732	923244	947268	1.03192e+06	1.05916e+06	925282	995643	1.14379e+06	986226	C09826	ko00941	C09826	-
mws1360	UPLC-MS/MS	433.114	269.044	-	-	434.121	C21H22O10	[M-H]-	Aromadendrin-3-O-rhamnoside; Engeletin	香橙素-3-O-鼠李糖苷; 黄杞苷	Flavonoids	黄酮	Flavanonols	二氢黄酮醇	572-31-6	3	-	-	-	1329.33	1329.33	1329.33	6646.64	23159.9	10030	68879.3	82671.6	79809.9	67784	49202.3	64507.8	-	-	-	-
Lacn004858	UPLC-MS/MS	535.181	373.128	-	-	536.189	C26H32O12	[M-H]-	Phellavin	异黄柏苷	Flavonoids	黄酮	Flavanonols	二氢黄酮醇	-	3	-	-	-	116506	96854.7	485619	712118	142939	287761	264593	347507	251128	302431	181799	200386	-	-	-	-
Wbwp008934	UPLC-MS/MS	495.34	259.17	-	-	494.34	C32H46O4	[M+H]+	Ethyl 3-[4,8-dimethyl-5-[1-(5-methyl-6-oxo-2,3-dihydropyran-2-yl)ethyl]-12-prop-1-en-2-yl-13-tetracyclo[7.5.0.01,13.04,8]tetradec-10-enyl]propanoate	3-[4,8-二甲基-5-[1-(5-甲基-6-氧代-2,3-二氢吡喃-2-基)乙基]-12-丙基-1-烯-2-基13-四环[7.5.0.01,13.04,8]十四烯基]丙酸乙酯	Terpenoids	萜类	Ditepenoids	二萜	-	2	-	-	-	1.03367e+06	1.11688e+06	983350	2.99531e+06	4.05839e+06	4.30422e+06	1.06935e+07	1.53339e+07	1.14924e+07	6.73818e+06	6.38551e+06	7.03187e+06	-	-	-	-
Qmxp082304	UPLC-MS/MS	349.2	285.19	-	-	348.194	C20H28O5	[M+H]+	Longikaurin A	长管香茶菜素 A	Terpenoids	萜类	Ditepenoids	二萜	75207-67-9	3	-	-	-	4202.75	4202.75	4202.75	4202.75	4202.75	4202.75	67018.2	62906.1	41945.1	22827.2	31274.9	21013.7	-	-	-	-
Wbkp012886	UPLC-MS/MS	425.21	365.19	-	-	424.21	C22H32O8	[M+H]+	(1S,3R,3a1S,8R,10S,11aS)-1,5,10-trihydroxy-3,3a1,8,11a-tetramethyl-2,11-dioxohexadecahydrodibenzo[de,g]chromen-4-yl acetate*	(1S,3R,3a1S,8R,10S,11aS)-1,5,10-三羟基-3,3a1,8,11-四甲基-2,11-二氧六六氢二苯并[de,g]色烯-4-基乙酸酯*	Terpenoids	萜类	Ditepenoids	二萜	-	3	-	-	-	4.14209e+06	4.02298e+06	3.94332e+06	4.57762e+06	3.46086e+06	3.62977e+06	4.75323e+06	4.51753e+06	4.16287e+06	4.3002e+06	4.56927e+06	4.68716e+06	-	-	-	-
Lamp012938	UPLC-MS/MS	289.25	121.1	-	-	288.245	C20H32O	[M+H]+	(1R,3R,7E,11S,12R)-Dolabella-4(16),7,18-trien-3-ol	(1R,3R,7E,11S,12R)-海兔烷-4(16),7,18-三烯-3-醇	Terpenoids	萜类	Ditepenoids	二萜	-	2	-	-	-	3536.32	3536.32	3536.32	3536.32	3536.32	3536.32	45512.8	61128.7	58975.4	19725.8	17681.6	22317.8	-	-	-	-
Hmgp002146	UPLC-MS/MS	639.23	177.05	-	-	638.221	C30H38O15	[M+H]+	Leucosceptoside A	米团花苷 A	Phenolic acids	酚酸类	Phenolic acids	酚酸类	83529-62-8	1	-	-	-	1.19128e+06	1.35096e+06	1.88854e+06	751852	1.48487e+06	1.87697e+06	759930	848932	799457	847384	1.29923e+06	1.17758e+06	-	-	-	-
Lasp010382	UPLC-MS/MS	335.26	67.05	-	-	334.25	C21H34O3	[M+H]+	Ent-16beta-Methoxy-19-Kauranoic Acid	对映-16-甲氧基-19-贝壳杉酸	Terpenoids	萜类	Ditepenoids	二萜	38308-35-9	2	-	-	-	117265	151967	144188	43706.9	38518.1	30866.9	88873.5	92149.3	107715	140463	161419	139579	-	-	-	-
pme3459	UPLC-MS/MS	317.21	299.2	-	-	316.204	C20H28O3	[M+H]+	Cafestol	咖啡醇	Terpenoids	萜类	Ditepenoids	二萜	469-83-0	3	-	-	-	86593.1	86593.1	86593.1	432965	602034	500719	1.71432e+06	1.61489e+06	1.70215e+06	925126	1.02e+06	872298	C09066	-	C09066	-
MWSslk239	UPLC-MS/MS	485.31	305.25	-	-	484.304	C26H44O8	[M+H]+	Darutoside	豨莶苷	Terpenoids	萜类	Ditepenoids	二萜	59219-65-7	3	-	-	-	53011.4	59042.7	53011.4	53002.2	55943.3	70145.1	10600.4	10600.4	10600.4	125491	100098	114371	-	-	-	-
pmp000970	UPLC-MS/MS	319.23	301.22	-	-	318.219	C20H30O3	[M+H]+	Hispanolone	夏罗草酮	Terpenoids	萜类	Ditepenoids	二萜	18676-07-8	3	-	-	-	82235.7	91584.9	63151.7	44173.6	40493.5	23919.2	89207.4	104161	119790	99827.2	56573.7	91990.9	-	-	-	-
Smmp009329	UPLC-MS/MS	347.18	301.18	-	-	346.178	C20H26O5	[M+H]+	Isorosmanol	异迷迭香酚	Terpenoids	萜类	Ditepenoids	二萜	93780-80-4	3	-	-	-	175728	175728	175728	931934	901878	878638	1.81981e+07	1.91317e+07	1.92194e+07	9.54169e+06	9.74288e+06	9.23236e+06	-	-	-	-
Cmcp007926	UPLC-MS/MS	333.21	287.2	-	-	332.199	C20H28O4	[M+H]+	Pinusolidic acid	松内酯酸	Terpenoids	萜类	Ditepenoids	二萜	40433-82-7	3	-	-	-	10552	10552	10552	10552	10552	10552	155561	162646	172636	83960	81401.7	52759.9	-	-	-	-
MWSmce270	UPLC-MS/MS	347.18	231.1	-	-	346.178	C20H26O5	[M+H]+	Rosmanol	迷迭香酚	Terpenoids	萜类	Ditepenoids	二萜	80225-53-2	3	-	-	-	12636.6	12636.6	12636.6	63183.2	78816.7	70299.6	1.79479e+06	1.70624e+06	1.74547e+06	837098	849345	872154	-	-	-	-
Wmhn000048	UPLC-MS/MS	637.21	461.17	-	-	638.221	C30H38O15	[M-H]-	Jionoside D*	焦地黄苯乙醇苷 D*	Phenolic acids	酚酸类	Phenolic acids	酚酸类	120406-34-0	2	-	-	-	1.52619e+07	2.15465e+07	1.83133e+07	1.66418e+07	1.42803e+07	1.82973e+07	1.05361e+07	7.05058e+06	8.98791e+06	1.56824e+07	8.69888e+06	1.56411e+07	-	-	-	-
Smmp008919	UPLC-MS/MS	347.18	301.18	-	-	346.178	C20H26O5	[M+H]+	Epirosmanol	表迷迭香酚	Terpenoids	萜类	Ditepenoids	二萜	-	3	-	-	-	164869	164869	164869	830445	824346	1.00803e+06	1.86873e+07	1.68143e+07	1.69098e+07	8.93783e+06	8.49114e+06	9.78937e+06	-	-	-	-
Smcn001136	UPLC-MS/MS	593.21	461.17	-	-	594.216	C25H38O16	[M-H]-	Leonuriside B	益母草苷 B	Phenolic acids	酚酸类	Phenolic acids	酚酸类	-	3	-	-	-	85521.4	76896.2	119006	210539	233549	264782	198116	176490	188312	211053	228574	224700	-	-	-	-
pmn001363	UPLC-MS/MS	493.11	313.07	-	-	494.121	C26H22O10	[M-H]-	Salvianolic acid N	丹酚酸 N	Phenolic acids	酚酸类	Phenolic acids	酚酸类	-	3	-	-	-	5744.25	28721.2	5744.25	5744.25	5744.25	5744.25	63075.8	71040.9	79409.8	31070.5	30506.2	31975.5	-	-	-	-
Qmxp101615	UPLC-MS/MS	349.272	179.142	-	-	348.266	C22H36O3	[M+H]+	Ent-3β-Acetoxyisopimar-15-8β-ol*	对映-3β-乙酰氧基异海松-15-烯-8β-醇*	Terpenoids	萜类	Ditepenoids	二萜	-	3	-	-	-	37794.4	37990.5	36470.5	69590.9	66958.2	62516.7	111501	122997	101367	70685.6	64933.7	75974.5	-	-	-	-
Lcsn000648	UPLC-MS/MS	541.3	481.28	-	-	542.309	C28H46O10	[M-H]-	ent-3α,16β,17,19-Tetrahydroxykauran-19-ylacetate-17-O-β-D-glucopyranoside	ent-3α,16β,17,19-四羟基贝壳杉烷-19-基-乙酸乙酯-17-O-β-D-吡喃葡萄糖苷	Terpenoids	萜类	Ditepenoids	二萜	-	2	-	-	-	24443.4	24443.4	24443.4	363337	312524	346086	216273	229099	177649	155367	173697	122217	-	-	-	-
Hmgn002530	UPLC-MS/MS	651.23	175.04	-	-	652.237	C31H40O15	[M-H]-	Cistanoside D	肉苁蓉苷 D	Phenolic acids	酚酸类	Phenolic acids	酚酸类	94492-21-4	2	-	-	-	1.16815e+07	1.52411e+07	1.35744e+07	1.07512e+07	1.1275e+07	7.36254e+06	1.91674e+06	1.96888e+06	1.63895e+06	6.98877e+06	8.2507e+06	6.4102e+06	-	-	-	-
pmn001364	UPLC-MS/MS	417.08	197.02	-	-	418.09	C20H18O10	[M-H]-	Salvianolic acid G	丹酚酸 G	Phenolic acids	酚酸类	Phenolic acids	酚酸类	136112-79-3	3	-	-	-	1.54259e+06	1.66916e+06	1.67405e+06	280658	230908	256853	46181.6	46181.6	46181.6	957295	749198	653803	-	-	-	-
Zmdn002435	UPLC-MS/MS	539.12	297	-	-	540.127	C27H24O12	[M-H]-	Yunnaneic acid D	云甘酸 D	Phenolic acids	酚酸类	Phenolic acids	酚酸类	180314-57-2	3	-	-	-	73828	103710	34651.5	56047	43810.8	49971.8	139682	81516.9	177289	39737.2	55026.2	34651.5	-	-	-	-
Cmmn013275	UPLC-MS/MS	301.22	301.22	-	-	302.225	C20H30O2	[M-H]-	Isopimaric acid*	异海松酸*	Terpenoids	萜类	Ditepenoids	二萜	5835-26-7	2	-	-	-	421569	431356	467221	435794	450171	442722	949309	917254	870197	553520	552351	454154	C09118	ko00904,ko01110	C09118	-
MWSslk208	UPLC-MS/MS	301.22	301.22	-	-	302.225	C20H30O2	[M-H]-	Kaurenoic Acid*	贝壳杉烯酸*	Terpenoids	萜类	Ditepenoids	二萜	6730-83-2	3	-	-	-	378211	458490	442884	404257	429793	431822	830273	1.17028e+06	1.13308e+06	509951	491915	425126	C11874	ko00904,ko01100,ko01110	C11874	-
Lmbn014696	UPLC-MS/MS	301.22	301.22	-	-	302.225	C20H30O2	[M-H]-	Pimaric acid*	海松酸*	Terpenoids	萜类	Ditepenoids	二萜	127-27-5	2	-	-	-	354799	438353	401973	428039	454119	444051	826597	810809	923848	502392	518304	436046	C09159	-	C09159	-
Cmmn013378	UPLC-MS/MS	301.22	301.22	-	-	302.225	C20H30O2	[M-H]-	Levopimaric acid*	左旋海松酸*	Terpenoids	萜类	Ditepenoids	二萜	79-54-9	2	-	-	-	384568	444000	447415	417030	426992	449096	943835	885904	954540	518567	493491	409517	-	-	-	-
Wadn005193	UPLC-MS/MS	359.08	197.05	-	-	360.085	C18H16O8	[M-H]-	Salvianic acid B	丹参酸 B	Phenolic acids	酚酸类	Phenolic acids	酚酸类	-	3	-	-	-	84007.7	75994.4	56515.6	153435	175856	114128	87155.8	124682	103695	88495.7	107891	49731.8	-	-	-	-
Wmhn000049	UPLC-MS/MS	637.21	461.17	-	-	638.221	C30H38O15	[M-H]-	cistanoside C*	肉苁蓉苷 C*	Phenolic acids	酚酸类	Phenolic acids	酚酸类	94492-22-5	2	-	-	-	1.61519e+07	2.06932e+07	1.4581e+07	1.73171e+07	1.11461e+07	1.84633e+07	8.78846e+06	7.66442e+06	1.04257e+07	1.50151e+07	7.94787e+06	1.47642e+07	-	-	-	-
Hmcn001296	UPLC-MS/MS	487.15	179.03	-	-	488.153	C21H28O13	[M-H]-	Cistanoside F	肉苁蓉苷 F	Phenolic acids	酚酸类	Phenolic acids	酚酸类	97411-47-7	3	-	-	-	2.07059e+07	2.33464e+07	2.32423e+07	1.05312e+07	1.0412e+07	1.27369e+07	5.10652e+07	5.05041e+07	5.30211e+07	3.15962e+07	3.22522e+07	2.89427e+07	-	-	-	-
Qmxp101503	UPLC-MS/MS	331.19	285.18	-	-	330.183	C20H26O4	[M+H]+	Liangshanin A	凉山香茶菜甲素	Terpenoids	萜类	Ditepenoids	二萜	122717-54-8	3	-	-	-	17533.7	17533.7	17533.7	17533.7	17533.7	17533.7	133573	144391	122839	89374.2	113822	87668.4	-	-	-	-
Qmxp101520	UPLC-MS/MS	303.23	165.09	-	-	302.225	C20H30O2	[M+H]+	Hinokiol	西诺奇醇	Terpenoids	萜类	Ditepenoids	二萜	564-73-8	3	-	-	-	31560.1	50489	35096.8	2836.33	2836.33	2836.33	2836.33	2836.33	2836.33	14181.7	15301.7	15787.2	-	-	-	-
Qmxp101524	UPLC-MS/MS	303.23	257.23	-	-	302.225	C20H30O2	[M+H]+	11β-Hydroxy-8,15-isopimaradiene-3-one	11β-羟基异海松-8,15-二烯-3-酮	Terpenoids	萜类	Ditepenoids	二萜	-	3	-	-	-	75929.2	67476.9	65502	8393	5137.17	10143.8	1027.43	1027.43	1027.43	21443.4	30153.5	28014.2	-	-	-	-
Wdzp006786	UPLC-MS/MS	221.19	107.09	-	-	220.183	C15H24O	[M+H]+	alismol	alismol	Terpenoids	萜类	Sesquiterpenoids	倍半萜	87827-55-2	3	-	-	-	97043.9	97043.9	97043.9	510643	485219	715018	1.26738e+06	1.42352e+06	1.16508e+06	780846	704882	703008	-	-	-	-
Wbmp005499	UPLC-MS/MS	755.24	285.08	-	-	754.232	C34H42O19	[M+H]+	Oxoflaccidin-Diglucosyl xyloside	氧代林荫银莲素二葡糖基木糖苷	Quinones	醌类	PhenAnthraquinones	菲醌	-	2	-	-	-	60250.6	63167.6	64499.6	30780.2	35741	37407.5	1.0013e+06	937663	1.07386e+06	257831	272397	239868	-	-	-	-
Zbln003676	UPLC-MS/MS	385.13	205.05	-	-	386.137	C21H22O7	[M-H]-	7-hydroxy-4-methoxyphenanthrene-2-O-glucoside	7-羟基-4-甲氧基菲-2-O-β-D-葡萄糖	Quinones	醌类	PhenAnthraquinones	菲醌	-	2	-	-	-	2.37391e+06	2.94291e+06	2.50488e+06	4.29186e+06	4.61939e+06	4.32594e+06	7.15467e+06	6.84819e+06	5.91495e+06	4.70399e+06	6.72278e+06	5.40938e+06	-	-	-	-
Wahp003049	UPLC-MS/MS	219.15	131.06	-	-	218.143	C13H18N2O	[M+H]+	N-Trans-Cinnamoylputrescine	N-反式肉桂酰腐胺	Alkaloids	生物碱	Phenolamine	酚胺	-	2	-	-	-	849986	825936	648275	864886	872115	960372	255454	264536	294736	540174	596370	550111	-	-	-	-
pma0692	UPLC-MS/MS	438.24	147.04	-	-	437.231	C25H31N3O4	[M+H]+	N1,N10-Bis(p-coumaroyl)spermidine	双(对香豆酰基)亚精胺	Alkaloids	生物碱	Phenolamine	酚胺	114916-05-1	3	-	-	-	6956.67	34783.4	6956.67	680277	819054	890067	4.83435e+06	4.48439e+06	4.22335e+06	1.88082e+06	2.24768e+06	1.51378e+06	C21169	-	C21169	-
pmb0490	UPLC-MS/MS	235.14	147.04	-	-	234.137	C13H18N2O2	[M+H]+	p-Coumaroylputrescine	对香豆酰基腐胺	Alkaloids	生物碱	Phenolamine	酚胺	34136-53-3	1	-	-	-	142247	142247	142247	142247	142247	142247	1.56954e+06	1.64612e+06	1.36284e+06	711233	779893	810706	C18326	ko00330,ko01100	C18326	-
pmb0496	UPLC-MS/MS	307.18	177.05	-	-	306.169	C15H22N4O3	[M+H]+	N-Feruloylagmatine	N-阿魏酰胍丁胺	Alkaloids	生物碱	Phenolamine	酚胺	-	1	-	-	-	3.0821e+07	3.18301e+07	2.96927e+07	2.23184e+07	2.26511e+07	1.92547e+07	3.578e+07	3.40031e+07	3.12068e+07	2.94525e+07	2.81555e+07	2.35276e+07	C18325	ko00999,ko01100,ko01110	C18325	-
Zdcp003644	UPLC-MS/MS	251.14	105.07	-	-	250.132	C13H18N2O3	[M+H]+	N-Caffeoylputrescine	咖啡酰腐胺	Alkaloids	生物碱	Phenolamine	酚胺	29554-26-5	1	-	-	-	3.69457e+07	4.04694e+07	3.08632e+07	918633	930838	981872	2.0314e+06	1.94751e+06	1.69857e+06	1.42183e+07	1.6026e+07	1.62458e+07	C03002	-	C03002	-
pmb0508	UPLC-MS/MS	277.17	147.04	-	-	276.159	C14H20N4O2	[M+H]+	p-Coumaroylagmatine	对香豆酰胍丁胺	Alkaloids	生物碱	Phenolamine	酚胺	7295-86-5	1	-	-	-	5.62636e+06	5.86916e+06	5.43601e+06	4.58465e+06	4.48559e+06	5.20021e+06	1.55471e+07	1.67807e+07	1.26522e+07	9.15393e+06	9.58153e+06	9840905	C04498	ko00999,ko01100,ko01110	C04498	-
Lmap001823	UPLC-MS/MS	312.11	132.04	-	-	311.101	C14H17NO7	[M+H]+	Dhurrin	蜀黍苷	Alkaloids	生物碱	Phenolamine	酚胺	499-20-7	1	-	-	-	155429	161647	102558	137820	135419	123555	1.89434e+06	2.41907e+06	1.21161e+06	1.14789e+06	1.15044e+06	1.94795e+06	C05143	ko00460,ko01100,ko01110	C05143	-
Hmcp009963	UPLC-MS/MS	180.14	123.07	-	-	180.138	C11H18NO+	[M]+	Candicine	N-甲基大麦芽碱	Alkaloids	生物碱	Phenolamine	酚胺	6656-13-9	1	-	-	-	184317	240862	159311	85491.3	133597	113261	241721	186597	202222	156739	159484	144693	C10575	-	C10575	-
Wafp003601	UPLC-MS/MS	321.19	177.06	-	-	320.185	C16H24N4O3	[M+H]+	N-Feruloylmethylagmatine	N-阿魏酰甲基胍丁胺	Alkaloids	生物碱	Phenolamine	酚胺	-	1	-	-	-	6.6569e+06	6.49056e+06	4.25913e+06	2.14454e+06	2.12586e+06	2.4339e+06	4.61288e+06	4.24157e+06	3.72352e+06	4.13203e+06	4.48226e+06	4.59652e+06	-	-	-	-
MWStz070	UPLC-MS/MS	182.08	91.05	-	-	181.074	C9H11NO3	[M+H]+	N-(2-Hydroxy-4-methoxyphenyl)acetamide	N-(2-羟基-4-甲氧基苯基)乙酰胺	Alkaloids	生物碱	Phenolamine	酚胺	58469-06-0	1	-	-	-	4.67495e+06	3.85071e+06	6.18645e+06	9.37553e+06	1.00593e+07	8.7158e+06	5.34471e+06	8.53399e+06	4.49534e+06	4.48866e+06	4.67462e+06	5.2486e+06	-	-	-	-
Wafp003158	UPLC-MS/MS	321.19	177.05	-	-	320.185	C16H24N4O3	[M+H]+	N-Feruloylhomoagmatine	N-阿魏酰高胍丁胺	Alkaloids	生物碱	Phenolamine	酚胺	-	1	-	-	-	4.71099e+06	5.02015e+06	4.60225e+06	1.36307e+06	1.42636e+06	1.56195e+06	2.79406e+06	2.38371e+06	2.69177e+06	2.4556e+06	4.0014e+06	2.96528e+06	-	-	-	-
pmp001248	UPLC-MS/MS	428.19	369.11	-	-	428.192	C20H30NO9+	[M]+	Caffeoylcholine-4-O-glucoside	咖啡酰胆碱-4-O-葡萄糖苷	Alkaloids	生物碱	Phenolamine	酚胺	-	2	-	-	-	16037.6	16037.6	16037.6	186817	177610	165362	100530	107390	80188	82564.9	94715.8	100003	-	-	-	-
Lmlp003161	UPLC-MS/MS	265.15	177.06	-	-	264.147	C14H20N2O3	[M+H]+	N-Feruloylputrescine	N-阿魏酰腐胺	Alkaloids	生物碱	Phenolamine	酚胺	501-13-3	2	-	-	-	121889	146107	104895	373409	402356	378096	1.35662e+06	1.70703e+06	1.433e+06	594101	692439	761285	C10497	ko00330,ko01100	C10497	-
pma0702	UPLC-MS/MS	558.28	207.07	-	-	557.274	C29H39N3O8	[M+H]+	N1,N8-Bis(sinapoyl)spermidine	N1,N8-双(芥子酰)亚精胺	Alkaloids	生物碱	Phenolamine	酚胺	-	3	-	-	-	62344.1	35307.7	31772.3	66316.2	42265	47555.2	3382.49	16912.5	3382.49	26286.6	26878.9	28482	C21170	-	C21170	-
pmp001073	UPLC-MS/MS	168.1	150.09	-	-	167.095	C9H13NO2	[M+H]+	Synephrine; 4-[1-Hydroxy-2-(methylamino)ethyl]phenol	辛弗林; 4-[1-羟基-2-(甲基氨基)乙基]苯酚	Alkaloids	生物碱	Phenolamine	酚胺	94-07-5	2	-	-	-	1.77235e+06	2.03305e+06	1.85746e+06	1.0349e+06	969719	1.13817e+06	5.7165e+06	5.03748e+06	5.28889e+06	2.4471e+06	2.56607e+06	2.73125e+06	C04548	-	C04548	-
pma0101	UPLC-MS/MS	293.16	163.04	-	-	292.154	C14H20N4O3	[M+H]+	Caffeoylagmatine	咖啡酰胍丁胺	Alkaloids	生物碱	Phenolamine	酚胺	-	3	-	-	-	3.2223e+06	2.73415e+06	2.65973e+06	3.53499e+07	3.72486e+07	3.6275e+07	3.59136e+07	3.91658e+07	3.23882e+07	2.47336e+07	2.3179e+07	2.25962e+07	-	-	-	-
pmp001141	UPLC-MS/MS	506.2	145.06	-	-	505.195	C25H31NO10	[M+H]+	Cimicifugamide	升麻酰胺	Alkaloids	生物碱	Phenolamine	酚胺	-	3	-	-	-	367334	389966	399009	424314	375763	370994	185169	168642	163822	214915	284334	255331	-	-	-	-
Lmhp005872	UPLC-MS/MS	455.22	177.05	-	-	454.21	C25H30N2O6	[M+H]+	Diferuloylcadaverine	二阿魏酰尸胺	Alkaloids	生物碱	Phenolamine	酚胺	-	3	-	-	-	19947.1	19947.1	19947.1	135097	99735.4	134621	348222	274570	324140	108527	115611	108166	-	-	-	-
pmb0325	UPLC-MS/MS	322.21	177.05	-	-	321.205	C17H27N3O3	[M+H]+	Feruloylspermidine	阿魏酰亚精胺	Alkaloids	生物碱	Phenolamine	酚胺	-	3	-	-	-	379182	335910	386208	184136	150280	261345	291450	275290	219594	250103	239777	192447	-	-	-	-
MWStz104	UPLC-MS/MS	182.08	124.05	-	-	181.074	C9H11NO3	[M+H]+	3,4-Dimethoxybenzamide	3,4-二甲氧基苯甲酰胺	Alkaloids	生物碱	Phenolamine	酚胺	1521-41-1	3	-	-	-	44680.8	6792.44	6792.44	33962.2	38347.6	50394.1	363662	338395	497043	72580.3	130210	70102.7	-	-	-	-
Lmlp004754	UPLC-MS/MS	312.11	294.21	-	-	311.101	C14H17NO7	[M+H]+	Ehretioside B	2-(葡萄糖基氧基)-4-羟基苯乙腈	Alkaloids	生物碱	Phenolamine	酚胺	156368-84-2	3	-	-	-	251270	299668	260108	62942.4	80755.6	84123.3	11974	17287.7	19238.5	76093.9	90049.4	99584.3	-	-	-	-
pmp001245	UPLC-MS/MS	280.15	221.08	-	-	280.154	C15H22NO4+	[M]+	Feruloylcholine	阿魏酰胆碱	Alkaloids	生物碱	Phenolamine	酚胺	85927-25-9	3	-	-	-	10712	10712	10712	10712	10712	10712	97692	141728	147514	91818.7	53560.2	67140.9	-	-	-	-
pmb0504	UPLC-MS/MS	469.23	177.05	-	-	468.222	C21H32N4O8	[M+H]+	N-(4'-O-glycosyl)-feruloyl agmatine	N-(4'-O-葡萄糖基)-阿魏酰胍丁胺	Alkaloids	生物碱	Phenolamine	酚胺	-	3	-	-	-	443617	445184	467592	141861	206957	205500	344333	205498	316902	258477	280390	286355	-	-	-	-
GQ512004	UPLC-MS/MS	456.25	310.21	-	-	455.242	C25H33N3O5	[M+H]+	N1-Dihydrocaffeoyl-N10-coumaroylspermidine	N1-二氢咖啡酰-N10-香豆酰亚精胺	Alkaloids	生物碱	Phenolamine	酚胺	-	3	-	-	-	214663	214663	214663	1.07332e+06	1.11775e+06	1.1604e+06	4.87149e+06	4.30076e+06	4.62639e+06	2.11041e+06	1.98938e+06	1.93283e+06	-	-	-	-
Lmlp003024	UPLC-MS/MS	439.22	277.17	-	-	438.211	C20H30O7N4	[M+H]+	N'-p-Coumaroylagmatine-glucoside	N'-对香豆酰丁胺葡萄糖苷	Alkaloids	生物碱	Phenolamine	酚胺	-	3	-	-	-	63079.4	63071.5	41748.8	235257	320319	263581	8349.76	8349.76	8349.76	110961	96067.2	117683	-	-	-	-
pma1839	UPLC-MS/MS	309.18	207.07	-	-	308.174	C16H24N2O4	[M+H]+	N-Sinapoylcadaverine	芥子酰尸胺	Alkaloids	生物碱	Phenolamine	酚胺	-	3	-	-	-	2196.07	2196.07	2196.07	18027.3	10980.4	21103.2	199092	166037	162026	53780.8	71324.7	44424.5	-	-	-	-
Hmtn001358	UPLC-MS/MS	310.09	148.04	-	-	311.101	C14H17NO7	[M-H]-	2-(D-Glucosyloxy)-4-hydroxybenzeneacetonitrile	2-(D-葡萄糖基氧基)-4-羟基苯乙腈	Alkaloids	生物碱	Phenolamine	酚胺	-	3	-	-	-	16330.9	15422.4	41721.8	28120.1	46256.5	48215.1	444675	454307	359095	422519	315534	291051	-	-	-	-
Hmln000659	UPLC-MS/MS	331.07	169.01	-	-	332.074	C13H16O10	[M-H]-	3-O-Galloyl-D-glucose	3-O-没食子酰-D-葡萄糖	Phenolic acids	酚酸类	Phenolic acids	酚酸类	-	1	-	-	-	183792	289827	294613	698648	762658	884432	88829.4	763372	217077	535550	300700	404053	-	-	-	-
Lahn001701	UPLC-MS/MS	395.03	241	-	-	396.036	C13H16O12S	[M-H]-	4-(6-O-Sulfo-Beta-D-Glucopyranosyloxy)-3-Hydroxybenzoic Acid	4-(6-O-Sulfo-Beta-D-Glucopyranosyloxy)-3-Hydroxybenzoic Acid	Phenolic acids	酚酸类	Phenolic acids	酚酸类	-	3	-	-	-	967249	1.29152e+06	1.26885e+06	547062	567083	599118	4.93614e+06	5.87027e+06	5.07406e+06	2.55788e+06	2.54303e+06	2.4345e+06	-	-	-	-
MWS20156	UPLC-MS/MS	375.11	163.04	-	-	374.1	C19H18O8	[M+H]+	Rosmarinic acid methyl ester	迷迭香酸甲酯	Phenolic acids	酚酸类	Phenolic acids	酚酸类	99353-00-1	3	-	-	-	208810	188644	197307	115944	116698	110049	10885	10885	10885	59627.2	54596.5	54424.9	-	-	-	-
pme1816	UPLC-MS/MS	353.09	191.06	-	-	354.095	C16H18O9	[M-H]-	Neochlorogenic acid (5-O-Caffeoylquinic acid)*	新绿原酸 (5-O-咖啡酰奎宁酸)*	Phenolic acids	酚酸类	Phenolic acids	酚酸类	906-33-2	1	-	-	-	284721	456082	395764	5.07915e+06	6.07769e+06	5.51895e+06	2.2724e+07	2.66938e+07	2.83241e+07	1.1839e+07	9.65703e+06	8.78827e+06	C17147	-	C17147	-
Smcn001947	UPLC-MS/MS	623.2	161.03	-	-	624.205	C29H36O15	[M-H]-	Acteoside; Verbascoside*	毛蕊花糖苷*	Phenolic acids	酚酸类	Phenolic acids	酚酸类	61276-17-3	1	-	-	-	1.87807e+06	2.24914e+06	2.76989e+06	2.27564e+06	2.90317e+06	2038176	2.2098e+06	1.95998e+06	1.48226e+06	2.16791e+06	2.3269e+06	2.31151e+06	C10501	-	C10501	-
mws2367	UPLC-MS/MS	299.114	119.05	-	-	300.121	C14H20O7	[M-H]-	Salidroside	红景天苷	Phenolic acids	酚酸类	Phenolic acids	酚酸类	10338-51-9	3	-	-	-	162484	245788	320747	188021	150987	220632	401022	355687	306130	281145	270194	356906	C06046	ko00350,ko01100	C06046	-
Lmyp003371	UPLC-MS/MS	125.06	110.04	-	-	124.052	C7H8O2	[M+H]+	3,5-Dihydroxytoluene	3-羟基-5-甲基苯酚	Phenolic acids	酚酸类	Phenolic acids	酚酸类	504-15-4	1	-	-	-	73939.9	92512.5	99768.6	104225	81674.4	126907	6.7284e+06	6.5542e+06	6.1014e+06	3.31965e+06	2.91814e+06	3.16516e+06	C00727	-	C00727	-
mws2213	UPLC-MS/MS	147.05	103.06	-	-	148.052	C9H8O2	[M-H]-	Cinnamic acid	肉桂酸	Phenolic acids	酚酸类	Phenolic acids	酚酸类	140-10-3	3	-	-	-	14471.6	14124.7	15205.8	9171.31	14689.5	10441.6	10143.2	4948.21	9169.86	8476.47	5046.93	5511.61	C00423	ko00130,ko00360,ko00940,ko00996,ko00999,ko01100,ko01110	C00423	-
mws0749	UPLC-MS/MS	137.02	93.03	-	-	138.032	C7H6O3	[M-H]-	4-Hydroxybenzoic acid	4-羟基苯甲酸	Phenolic acids	酚酸类	Phenolic acids	酚酸类	99-96-7	1	-	-	-	737415	920882	586008	1.98713e+06	2.36208e+06	1.90026e+06	2.53299e+06	2.09486e+06	2.80538e+06	1.71819e+06	1.72024e+06	1.34131e+06	C00156	ko00130,ko00790,ko01100,ko01110,ko01240	C00156	-
Saln004708	UPLC-MS/MS	361.15	199.1	-	-	362.158	C16H26O9	[M-H]-	1-O-Glucopyranosylamplexine	1-O-Glucopyranosylamplexine	Terpenoids	萜类	Monoterpenoids	倍萜	-	3	-	-	-	73897.2	40934.9	40931.3	354359	438559	458943	2.56166e+06	2.45983e+06	2.3428e+06	1.06665e+06	1.39609e+06	1.20813e+06	-	-	-	-
MWSHC20125	UPLC-MS/MS	335.08	135.05	-	-	336.084	C16H16O8	[M-H]-	5-O-Caffeoylshikimic acid	5-O-咖啡酰莽草酸	Phenolic acids	酚酸类	Phenolic acids	酚酸类	73263-62-4	1	-	-	-	11981.4	59907.1	11981.4	212446	227227	212030	1.1536e+06	1.07583e+06	1.03145e+06	461769	477344	662046	-	-	-	-
Lmxp005131	UPLC-MS/MS	639.23	339.11	-	-	638.221	C30H38O15	[M+H]+	Scrophuside	Scrophuside	Phenolic acids	酚酸类	Phenolic acids	酚酸类	1621720-38-4	3	-	-	-	446909	420222	934900	721164	371286	451077	256622	159531	167388	462503	259886	554268	-	-	-	-
Zmhn001926	UPLC-MS/MS	299.08	137.02	-	-	300.084	C13H16O8	[M-H]-	1-O-Salicyloyl-β-D-glucose*	1-O-水杨酰-β-D-葡萄糖*	Phenolic acids	酚酸类	Phenolic acids	酚酸类	60517-74-0	1	-	-	-	540211	713154	803781	7.23749e+06	6.84234e+06	7.2477e+06	3.81611e+06	3.91676e+06	3.83667e+06	4.5344e+06	3.55903e+06	4.27507e+06	-	-	-	-
MWSmce332	UPLC-MS/MS	209.08	191.07	-	-	208.074	C11H12O4	[M+H]+	3,4-Dimethoxycinnamic acid	3,4-二甲氧基肉桂酸	Phenolic acids	酚酸类	Phenolic acids	酚酸类	2316-26-9	3	-	-	-	60405.8	70626.3	62594	100315	93083.5	88093.6	158073	189383	191788	132397	102712	125176	-	-	-	-
mws1212	UPLC-MS/MS	209.08	177.05	-	-	208.074	C11H12O4	[M+H]+	Ferulic acid methyl ester	阿魏酸甲酯	Phenolic acids	酚酸类	Phenolic acids	酚酸类	2309-07-1	3	-	-	-	393173	431408	369460	229041	209470	239273	620824	632124	786419	455004	336971	365140	-	-	-	-
Yajn003986	UPLC-MS/MS	445.21	59.01	-	-	446.215	C21H34O10	[M-H]-	Dihydropenstemide	Dihydropenstemide	Terpenoids	萜类	Monoterpenoids	倍萜	-	3	-	-	-	1.81628e+06	2.23424e+06	1.99765e+06	3.3824e+06	3.40865e+06	3.32594e+06	2.01434e+06	2.05874e+06	1.83648e+06	2.21022e+06	2.58576e+06	1.82968e+06	-	-	-	-
mws1195	UPLC-MS/MS	179.07	147.04	-	-	178.063	C10H10O3	[M+H]+	p-Coumaric acid methyl ester	对香豆酸甲酯	Phenolic acids	酚酸类	Phenolic acids	酚酸类	19367-38-5	3	-	-	-	128560	101863	87184.9	128560	159242	152924	1.07882e+06	1.19031e+06	1.35398e+06	440362	328226	376565	-	-	-	-
Lmnn102707	UPLC-MS/MS	315.11	135.04	-	-	316.116	C14H20O8	[M-H]-	Cimidahurinine*	北升麻宁*	Phenolic acids	酚酸类	Phenolic acids	酚酸类	142542-89-0	1	-	-	-	4.49624e+06	6.42555e+06	7.82544e+06	4.01077e+06	4.38352e+06	5.00701e+06	2.92889e+06	2.83036e+06	2.4581e+06	6.33008e+06	5.36867e+06	4.8878e+06	-	-	-	-
Wafn002319	UPLC-MS/MS	515.14	323.08	-	-	516.148	C22H28O14	[M-H]-	4-O-(3'-O-alpha-D-Glucopyranosyl)caffeoylquinic acid	4-O-(3'-O-α-D-吡喃葡萄糖基)咖啡酰奎尼酸	Phenolic acids	酚酸类	Phenolic acids	酚酸类	1401352-63-3	1	-	-	-	24395.8	24395.8	24395.8	121979	158750	134979	2.86714e+06	2.06112e+06	2.46131e+06	884011	1.04902e+06	678747	-	-	-	-
Yajn003045	UPLC-MS/MS	443.19	59.01	-	-	444.2	C21H32O10	[M-H]-	Ebuloside	Ebuloside	Terpenoids	萜类	Monoterpenoids	倍萜	-	3	-	-	-	988000	918902	968110	148577	189101	174383	157611	225947	169403	408443	454769	385326	-	-	-	-
Lhyp080702	UPLC-MS/MS	353.23	261.22	-	-	352.225	C20H32O5	[M+H]+	Leopersin C(15-epi-leopersin C)	Leopersin C(15-epi-leopersin C)	Terpenoids	萜类	Monoterpenoids	倍萜	172821-84-0	2	-	-	-	2.57617e+06	2.79413e+06	2.61854e+06	803928	1.00225e+06	941235	423252	554558	433180	1.57573e+06	1.70099e+06	1.74487e+06	-	-	-	-
Lacp005649	UPLC-MS/MS	653.24	177.05	-	-	652.236	C31H40O15	[M+H]+	Martinoside	Martinoside	Phenolic acids	酚酸类	Phenolic acids	酚酸类	-	3	-	-	-	955020	1.23313e+06	971836	498164	433969	585381	175380	145991	138545	576570	447646	466062	-	-	-	-
Lasp003707	UPLC-MS/MS	225.08	119.05	-	-	224.069	C11H12O5	[M+H]+	Acropyrone	Acropyrone	Phenolic acids	酚酸类	Phenolic acids	酚酸类	-	3	-	-	-	310621	311679	379682	1.15794e+06	1.29402e+06	1.23083e+06	2.33093e+06	2.15293e+06	2.28501e+06	1.54396e+06	1.47059e+06	1.5987e+06	-	-	-	-
Cmdp003482	UPLC-MS/MS	245.09	149.06	-	-	244.095	C11H16O6	[M+H]+	Shanzhigenin methyl ester	Shanzhigenin methyl ester	Terpenoids	萜类	Monoterpenoids	倍萜	80734-63-0	3	-	-	-	81220.9	82092.9	44220.9	100393	73519.1	114119	410916	353972	410942	245853	235644	234724	-	-	-	-
Lmxp011770	UPLC-MS/MS	279.16	149.02	-	-	278.152	C16H22O4	[M+H]+	Diisobutyl phthalate	邻苯二甲酸二异丁酯	Phenolic acids	酚酸类	Phenolic acids	酚酸类	84-69-5	2	-	-	-	4.58344e+06	4.91603e+06	4.50281e+06	4.56936e+06	4.51174e+06	4.59936e+06	5.89468e+06	5.77642e+06	5.35501e+06	4.82909e+06	5.09098e+06	5.3947e+06	C15205	-	C15205	-
Lmbp000728	UPLC-MS/MS	121.06	77.04	-	-	120.058	C8H8O	[M+H]+	2-Phenyloxirane	2-苯基环氧乙烷	Phenolic acids	酚酸类	Phenolic acids	酚酸类	20780-54-5	1	-	-	-	3208930	3.21907e+06	2.95703e+06	2.76964e+06	3.47224e+06	3.25474e+06	1.69009e+08	1.56735e+08	1.62336e+08	8.75906e+07	8.87926e+07	9.2307e+07	C20782	ko01100	C20782	-
Smbp007068	UPLC-MS/MS	454.22	124.04	-	-	453.215	C26H31NO6	[M+H]+	Scutehenanine A	Scutehenanine A	Alkaloids	生物碱	Pyridine alkaloids	吡啶类生物碱	-	3	-	-	-	43050.7	59782.5	43308.4	22608.9	21595.4	22161.4	16523.9	23391.4	26528.2	31743.7	25121	28787.8	-	-	-	-
Lckn000308	UPLC-MS/MS	777.27	175.04	-	-	778.268	C37H46O18	[M-H]-	picfeoside A	picfeoside A	Phenolic acids	酚酸类	Phenolic acids	酚酸类	-	3	-	-	-	860815	912872	745584	183412	179300	156620	27899.2	27899.2	27899.2	141366	172075	139496	-	-	-	-
Zmzp000987	UPLC-MS/MS	158.12	98.1	-	-	158.118	C8H16NO2+	[M]+	Stachydrine methyl ester	Stachydrine methyl ester	Alkaloids	生物碱	Pyrrole alkaloids	吡咯类生物碱	-	3	-	-	-	138362	211898	176084	2.7031e+06	2.72868e+06	2.78997e+06	1.35602e+06	1.39163e+06	1.50113e+06	1.5986e+06	1.77643e+06	1.81261e+06	-	-	-	-
Lcgn000234	UPLC-MS/MS	339.07	177.02	-	-	340.079	C15H16O9	[M-H]-	davidioside C	davidioside C	Phenolic acids	酚酸类	Phenolic acids	酚酸类	-	3	-	-	-	312477	423192	327940	1.04452e+06	1.15576e+06	1.26846e+06	7.44491e+06	8.315e+06	7.85527e+06	3.95398e+06	4.14737e+06	3.95311e+06	-	-	-	-
zjbp120812	UPLC-MS/MS	425.22	365.19	-	-	424.21	C22H32O8	[M+H]+	Scutebarbolide C*	Scutebarbolide C*	Terpenoids	萜类	Ditepenoids	二萜	-	3	-	-	-	4.11075e+06	3.91397e+06	3.96482e+06	4.79149e+06	3.30895e+06	3.48465e+06	4.39501e+06	4.40256e+06	4.06236e+06	4.35552e+06	4.71251e+06	4.58974e+06	-	-	-	-
Lacp003788	UPLC-MS/MS	369.12	177.06	-	-	368.111	C17H20O9	[M+H]+	Amurenlaetone A*	关黄柏内酯 A*	Phenolic acids	酚酸类	Phenolic acids	酚酸类	-	3	-	-	-	45495.2	54407.3	49443.2	191553	201296	206197	2.21432e+07	2.21589e+07	2.31023e+07	9.97055e+06	1.24534e+07	9.82926e+06	-	-	-	-
MWSHC2022	UPLC-MS/MS	359.1	197.05	-	-	360.106	C15H20O10	[M-H]-	Glucosyringic acid	葡萄糖基丁香酸	Phenolic acids	酚酸类	Phenolic acids	酚酸类	33228-65-8	2	-	-	-	629545	737267	588542	1.23598e+06	1.11948e+06	1.57063e+06	1.35752e+06	1.62497e+06	1.58723e+06	1.53843e+06	1.40227e+06	1.2677e+06	-	-	-	-
Lmcp101903	UPLC-MS/MS	479.16	163.04	-	-	478.147	C23H26O11	[M+H]+	Desrhamnosylisoacteoside	去鼠李糖基异洋丁香酚苷	Phenolic acids	酚酸类	Phenolic acids	酚酸类	-	1	-	-	-	7.36732e+06	8.57651e+06	8.30918e+06	1.86373e+07	1.69334e+07	1.35595e+07	6.78165e+06	7.4997e+06	7.4226e+06	9.61846e+06	7.28128e+06	8.87298e+06	-	-	-	-
Lmcp101902	UPLC-MS/MS	479.16	163.04	-	-	478.147	C23H26O11	[M+H]+	Desrhamnosylacteoside	去鼠李糖基洋丁香酚苷	Phenolic acids	酚酸类	Phenolic acids	酚酸类	-	1	-	-	-	7.01481e+06	7.57059e+06	8.66278e+06	1.23472e+07	9.18765e+06	1.12469e+07	8.40798e+06	7.5975e+06	6.97697e+06	1.10121e+07	8.15489e+06	8.02218e+06	-	-	-	-
Hmgp001944	UPLC-MS/MS	625.21	163.03	-	-	624.205	C29H36O15	[M+H]+	Isoacteoside	异毛蕊花糖苷	Phenolic acids	酚酸类	Phenolic acids	酚酸类	61303-13-7	1	-	-	-	8.89334e+06	5.63828e+06	3.78901e+06	7.63957e+06	7.35602e+06	5.47446e+06	4.7055e+06	6.65432e+06	3.45644e+06	3.98269e+06	8.10665e+06	4469553	-	-	-	-
Hmgp002033	UPLC-MS/MS	623.2	163.03	-	-	622.19	C29H34O15	[M+H]+	Isocrenatoside	异黄药苷	Phenolic acids	酚酸类	Phenolic acids	酚酸类	221895-09-6	1	-	-	-	767039	825060	1.31649e+06	303696	468558	323954	485961	370798	333924	449753	541406	430540	-	-	-	-
Hmbp001276	UPLC-MS/MS	169.05	65.03	-	-	168.042	C8H8O4	[M+H]+	Gallacetophenone	没食子苯乙酮	Phenolic acids	酚酸类	Phenolic acids	酚酸类	528-21-2	1	-	-	-	162013	153550	169357	1.39736e+06	1.59636e+06	1.62621e+06	1.30838e+06	1.39498e+06	1.55778e+06	1.14012e+06	1.18881e+06	1.0484e+06	-	-	-	-
Wdtp010604	UPLC-MS/MS	383.2	267.12	-	-	382.199	C20H30O7	[M+H]+	4-Octylphenol-1-O-glucuronide	4-辛基苯酚-1-O-葡萄糖醛酸苷	Phenolic acids	酚酸类	Phenolic acids	酚酸类	-	1	-	-	-	59138.1	89724.9	89685.5	61758.6	35217.7	43326.8	62416.7	73252.9	68343.4	68019.6	65707.8	69722.6	-	-	-	-
Wdtp003384	UPLC-MS/MS	387.13	225.08	-	-	386.121	C17H22O10	[M+H]+	3,4,5,6-tetrahydroxy-6-[4-(2-methylpropanoyloxymethyl)phenoxy]oxane-2-carboxylic acid	3,4,5,6-四羟基-6-[4-(2-甲基丙酰氧基甲基)苯氧基]恶烷-2-羧酸	Phenolic acids	酚酸类	Phenolic acids	酚酸类	-	2	-	-	-	3.71321e+06	5.50837e+06	5.37974e+06	2.41015e+06	2.40519e+06	3.05017e+06	133217	146806	215142	2.07379e+06	3.09443e+06	2.44157e+06	-	-	-	-
Hmbp003234	UPLC-MS/MS	255.09	163.03	-	-	254.079	C12H14O6	[M+H]+	1-O-Caffeoylglycerol	1-O-咖啡酰单甘油	Phenolic acids	酚酸类	Phenolic acids	酚酸类	-	2	-	-	-	802711	948243	1.01685e+06	1.39312e+06	1.36824e+06	1.5951e+06	1.2507e+06	1.19391e+06	1.4452e+06	1.32368e+06	1.3588e+06	1.18569e+06	-	-	-	-
WaYp005219	UPLC-MS/MS	309.1	147.04	-	-	308.09	C15H16O7	[M+H]+	1-O-(p-coumaroyl) 3-Hydroxy-3-methylglutaric acid	1-O-(对香豆酰基) 3-羟基-3-甲基戊二酸	Phenolic acids	酚酸类	Phenolic acids	酚酸类	-	2	-	-	-	1.05793e+06	937300	1.15538e+06	787433	740009	852498	2.14334e+06	1.62656e+06	2.59855e+06	1.8832e+06	1.53016e+06	1.36404e+06	-	-	-	-
Wdtp004957	UPLC-MS/MS	443.19	399.2	-	-	442.184	C21H30O10	[M+H]+	6-[2,3-Dihydroxy-4-ethoxy-4-oxobutyl]-alpha-hydroxy-2-(4-methoxyphenyl)-1,3-dioxane-4-acetic acid ethyl ester	6-[2,3-二羟基-4-乙氧基-4-氧代丁基]-α-羟基-2-(4-甲氧基苯基)-1,3-二恶烷-4-乙酸乙酯	Phenolic acids	酚酸类	Phenolic acids	酚酸类	-	2	-	-	-	70909.7	80768.1	77230.4	276292	301623	249159	476282	643403	382515	301299	221605	398814	-	-	-	-
WaYp004929	UPLC-MS/MS	309.1	147.04	-	-	308.09	C15H16O7	[M+H]+	3-O-(p-coumaroyl) 3-Hydroxy-3-methylglutaric acid	3-O-(对香豆酰基) 3-羟基-3-甲基戊二酸	Phenolic acids	酚酸类	Phenolic acids	酚酸类	-	2	-	-	-	1.03136e+06	971242	1.19556e+06	810592	969822	785270	2.24898e+06	2.17581e+06	3.09992e+06	1.76571e+06	1.55684e+06	1.67477e+06	-	-	-	-
Zblp004877	UPLC-MS/MS	493.17	177.05	-	-	492.161	C24H28O11	[M+H]+	Tetrahydrorengyoxide-glucose-sinapoyl	四氢连翘醇氧化物-葡萄糖-芥子酰	Phenolic acids	酚酸类	Phenolic acids	酚酸类	-	2	-	-	-	4.43365e+06	3.73111e+06	2.97965e+06	2.98516e+06	2.72528e+06	2.0109e+06	1.38769e+06	1.86895e+06	1.53633e+06	2.82559e+06	2.0681e+06	2.5202e+06	-	-	-	-
Wdtp003420	UPLC-MS/MS	357.12	177.05	-	-	356.111	C16H20O9	[M+H]+	3,4,5-Trihydroxy-6-[[3-(4-methoxyphenyl)oxiran-2-yl]methoxy]oxane-2-carboxylic acid	3,4,5-三羟基-6-[[3-(4-甲氧基苯基)氧杂-2-基]甲氧基]氧杂-2-羧酸	Phenolic acids	酚酸类	Phenolic acids	酚酸类	-	2	-	-	-	305014	161265	564679	524592	330802	798508	521390	979238	863134	644259	662587	894760	-	-	-	-
Zbyp005789	UPLC-MS/MS	411.11	123.04	-	-	410.1	C22H18O8	[M+H]+	Epicatechin-3-O-p-hydroxybenzoate	(-)-表儿茶素-3-O-p-羟基苯酸酯	Phenolic acids	酚酸类	Phenolic acids	酚酸类	-	2	-	-	-	104440	169688	132776	55110.2	69409	32209.7	6441.93	6441.93	6441.93	51808.3	51811.6	36848.5	-	-	-	-
Lafp002938	UPLC-MS/MS	481.17	177.05	-	-	480.163	C23H28O11	[M+H]+	Evofolin B glucoside	楝叶吴萸素B葡萄糖苷	Phenolic acids	酚酸类	Phenolic acids	酚酸类	-	2	-	-	-	938257	727148	978129	545619	449685	583260	199866	190686	279446	405901	293721	486470	-	-	-	-
HJAP051	UPLC-MS/MS	227.13	181.09	-	-	226.12	C12H18O4	[M+H]+	3-(3,4,5-Trimethoxyphenyl)propan-1-ol	3-(3,4,5-三甲氧基苯基)丙-1-醇	Phenolic acids	酚酸类	Phenolic acids	酚酸类	-	2	-	-	-	9.75812e+06	1.0857e+07	8.67908e+06	2.88657e+07	3.40881e+07	3.31031e+07	1.06274e+06	1.21393e+06	1.16166e+06	1.43996e+07	1.32557e+07	1.36152e+07	-	-	-	-
pmp000086	UPLC-MS/MS	269.1	177.05	-	-	268.095	C13H16O6	[M+H]+	1-Feruloyl-sn-glycerol	1-阿魏酰-sn-甘油	Phenolic acids	酚酸类	Phenolic acids	酚酸类	-	3	-	-	-	167907	151307	180561	243533	262044	518737	285489	290431	253458	216310	185432	221256	-	-	-	-
pma3724	UPLC-MS/MS	369.12	177.05	-	-	368.111	C17H20O9	[M+H]+	1-O-Feruloylquinic acid*	1-O-阿魏酰奎宁酸*	Phenolic acids	酚酸类	Phenolic acids	酚酸类	-	3	-	-	-	61479	73195	58569.3	298739	199163	267195	4.09103e+07	3.71101e+07	3.43838e+07	1.56755e+07	2.04195e+07	2.01889e+07	-	-	-	-
pmp000087	UPLC-MS/MS	269.1	177.05	-	-	268.095	C13H16O6	[M+H]+	2-Feruloyl-sn-glycerol	2-阿魏酰-sn-甘油	Phenolic acids	酚酸类	Phenolic acids	酚酸类	-	3	-	-	-	179642	214410	139125	229056	352827	247299	230324	231383	127257	277140	173067	202858	-	-	-	-
Lmsp004798	UPLC-MS/MS	613.12	147.04	-	-	612.111	C29H24O15	[M+H]+	3-O-Cinnamoyl-4,6-(S)-HHDP-β-D-glucose	3-O-肉桂酰-4,6-(S)-六羟基二苯甲酰基-β-D-葡萄糖	Phenolic acids	酚酸类	Phenolic acids	酚酸类	-	3	-	-	-	7059.68	7059.68	7059.68	7059.68	7059.68	7059.68	71044.8	162769	122918	68166.2	61462.9	35298.4	-	-	-	-
ML10179289	UPLC-MS/MS	105.07	77.04	-	-	122.073	C8H10O	[M-H2O+H]+	2-Phenylethanol	2-苯乙醇	Phenolic acids	酚酸类	Phenolic acids	酚酸类	60-12-8	2	-	-	-	275363	330244	354914	55072.6	55072.6	55072.6	1.03579e+06	1.17502e+06	987237	479339	675964	557071	C05853	ko00360	C05853	-
MWSmce537	UPLC-MS/MS	167.07	124.05	-	-	166.063	C9H10O3	[M+H]+	Veratraldehyde	藜芦醛	Phenolic acids	酚酸类	Phenolic acids	酚酸类	120-14-9	2	-	-	-	23175.9	23175.9	23175.9	147078	115880	124772	1.15237e+06	1.14401e+06	787426	392764	569188	556358	C02201	-	C02201	-
NK10253223	UPLC-MS/MS	168.06	94.06	-	-	167.058	C8H9NO3	[M+H]+	2-Amino-3-methoxybenzoic acid	2-氨基-3-甲氧基苯甲酸	Phenolic acids	酚酸类	Phenolic acids	酚酸类	3177-80-8	2	-	-	-	516381	536802	497729	275645	272476	289203	1.48809e+06	1.39439e+06	1.31674e+06	638710	739544	676414	C05831	ko00380	C05831	-
pmb0751	UPLC-MS/MS	321.1	147.04	-	-	320.09	C16H16O7	[M+H]+	Trans-5-O-(p-Coumaroyl)shikimate	反式-5-O-对香豆酰莽草酸	Phenolic acids	酚酸类	Phenolic acids	酚酸类	-	3	-	-	-	14357.5	14357.5	14357.5	14357.5	71787.5	14357.5	227864	187868	249293	104489	124652	118405	C02947	ko00940,ko00941,ko00945,ko01100,ko01110	C02947	-
Lsmp121705	UPLC-MS/MS	303.11	141.05	-	-	302.1	C13H18O8	[M+H]+	Tachioside	它乔糖苷	Phenolic acids	酚酸类	Phenolic acids	酚酸类	109194-60-7	2	-	-	-	60385.8	60385.8	60385.8	60385.8	60385.8	60385.8	720285	686896	604675	340792	367373	301929	-	-	-	-
MWSprf134	UPLC-MS/MS	467.12	305.07	-	-	466.111	C21H22O12	[M+H]+	Plantagoside	车前子苷	Phenolic acids	酚酸类	Phenolic acids	酚酸类	78708-33-5	2	-	-	-	70531.8	103181	34511	172492	171234	181283	552715	377711	449474	358826	334903	331130	C17531	-	C17531	-
Qmdp112514	UPLC-MS/MS	303.23	95.09	-	-	302.225	C20H30O2	[M+H]+	Isolophanthin A*	Isolophanthin A*	Terpenoids	萜类	Ditepenoids	二萜	-	2	-	-	-	410676	448537	390723	297430	307338	365199	186703	140349	159623	153595	209333	206888	-	-	-	-
Lahp002797	UPLC-MS/MS	183.06	123.04	-	-	182.058	C9H10O4	[M+H]+	Methyl Orsellinate	苔色酸甲酯	Phenolic acids	酚酸类	Phenolic acids	酚酸类	3187-58-4	2	-	-	-	1.63577e+06	1.2555e+06	1.04309e+06	823646	756096	793328	864975	657292	222511	739733	958168	874852	-	-	-	-
mws1336	UPLC-MS/MS	138.06	120.04	-	-	137.048	C7H7NO2	[M+H]+	4-Aminobenzoic acid	4-氨基苯甲酸	Phenolic acids	酚酸类	Phenolic acids	酚酸类	150-13-0	3	-	-	-	53830.7	100091	51284.9	76887.2	103336	81675.2	140077	125390	98527.8	75665	103272	99202.9	C00568	ko00790,ko01100,ko01240	C00568	-
pme2828	UPLC-MS/MS	140.03	98.96	-	-	139.027	C6H5NO3	[M+H]+	4-Nitrophenol	4-硝基苯酚	Phenolic acids	酚酸类	Phenolic acids	酚酸类	100-02-7	3	-	-	-	2.69276e+07	3.16494e+07	3.17586e+07	1.38316e+08	133925664	1.37209e+08	2.68382e+07	2.75135e+07	2.15789e+07	4.23196e+07	5.07086e+07	5.0182e+07	C00870	-	C00870	-
Lmwp011196	UPLC-MS/MS	391.28	149.02	-	-	390.277	C24H38O4	[M+H]+	Bis(2-ethylhexyl)phthalate*	邻苯二甲酸二(2-乙基己基)酯*	Phenolic acids	酚酸类	Phenolic acids	酚酸类	117-81-7	3	-	-	-	1.9951e+06	2.57968e+06	2.72099e+06	2.21992e+06	2.53808e+06	2.59371e+06	1.92641e+06	2.01758e+06	1.97164e+06	1.62038e+06	2.0917e+06	2.00287e+06	C03690	-	C03690	-
Lmlp001436	UPLC-MS/MS	183.07	165.06	-	-	182.058	C9H10O4	[M+H]+	Dihydrocaffeic acid	二氢咖啡酸	Phenolic acids	酚酸类	Phenolic acids	酚酸类	1078-61-1	3	-	-	-	203637	169599	190242	455837	518759	505496	350883	394559	403870	440057	436712	381147	C10447	ko00350,ko01100	C10447	-
Lmmp010562	UPLC-MS/MS	391.28	149.02	-	-	390.277	C24H38O4	[M+H]+	Diisooctyl Phthalate*	邻苯二甲酸二异辛酯*	Phenolic acids	酚酸类	Phenolic acids	酚酸类	27554-26-3	3	-	-	-	2.1805e+06	2.58884e+06	2.67654e+06	2.36014e+06	2.51656e+06	2.64104e+06	1.8588e+06	1.96387e+06	2.06506e+06	1.51414e+06	2.07013e+06	1.8849e+06	C14577	-	C14577	-
Cmyp005063	UPLC-MS/MS	425.18	147.04	-	-	424.173	C21H28O9	[M+H]+	Grandidentatin	大齿杨苷	Phenolic acids	酚酸类	Phenolic acids	酚酸类	15732-48-6	3	-	-	-	31137.2	46456.3	46215.3	42100	43245.6	37415	453579	399112	430978	193796	174580	155096	C10463	-	C10463	-
MWS2069	UPLC-MS/MS	139.08	77.04	-	-	138.068	C8H10O2	[M+H]+	2-Methoxy-4-methylphenol	2-甲氧基-4-甲基苯酚	Phenolic acids	酚酸类	Phenolic acids	酚酸类	93-51-6	3	-	-	-	150873	135306	113184	129433	129854	148086	182757	188015	212751	148495	82146.9	151023	-	-	-	-
MWSmce284	UPLC-MS/MS	155.07	95.05	-	-	154.063	C8H10O3	[M+H]+	3,4-Dimethoxyphenol	3,4-二甲氧基苯酚	Phenolic acids	酚酸类	Phenolic acids	酚酸类	2033-89-8	3	-	-	-	1.03511e+06	1.22566e+06	1.28589e+06	404463	417987	476991	675887	625740	542221	663851	629431	523707	-	-	-	-
MWSslk066	UPLC-MS/MS	169.05	65.04	-	-	168.042	C8H8O4	[M+H]+	3-Hydroxy-4-methoxybenzoic acid; Isovanillic Acid	3-羟基-4-甲氧基苯甲酸; 异香草酸	Phenolic acids	酚酸类	Phenolic acids	酚酸类	645-08-9	3	-	-	-	71696.9	167780	221227	255758	618983	622796	194036	227470	164010	563657	299165	297886	-	-	-	-
pmb1587	UPLC-MS/MS	207.14	165.09	-	-	206.131	C13H18O2	[M+H]+	4-Hydroxy-3,5-diisopropylbenzaldehyde	4-羟基-3,5-二异丙基苯甲醛	Phenolic acids	酚酸类	Phenolic acids	酚酸类	10537-86-7	3	-	-	-	551677	562099	498846	316307	330851	319925	82068.4	74998.1	80626.4	310311	397680	373246	-	-	-	-
MWSmce001	UPLC-MS/MS	181.05	107.05	-	-	180.042	C9H8O4	[M+H]+	5-Acetylsalicylic acid	5-乙酰基水杨酸	Phenolic acids	酚酸类	Phenolic acids	酚酸类	13110-96-8	3	-	-	-	307045	311531	353937	82623.9	268383	141383	137276	105502	120786	91495.6	87706.6	145862	-	-	-	-
Lmqp002761	UPLC-MS/MS	313.14	151.08	-	-	312.136	C19H20O4	[M+H]+	Alnusonol	赤杨醇	Phenolic acids	酚酸类	Phenolic acids	酚酸类	52330-12-8	3	-	-	-	195744	185657	204609	321768	563636	644155	651041	109225	575756	389916	411025	397030	-	-	-	-
pmf0132	UPLC-MS/MS	141.02	123.01	-	-	140.011	C6H4O4	[M+H]+	Coumalic acid	香豆酸	Phenolic acids	酚酸类	Phenolic acids	酚酸类	500-05-0	3	-	-	-	234469	250380	248284	536289	536292	522444	3.00019e+06	2.12846e+06	1.04361e+06	2.9916e+06	4.04911e+06	4.47547e+06	-	-	-	-
MWSmce577	UPLC-MS/MS	207.1	161.06	-	-	206.094	C12H14O3	[M+H]+	Ethyl p-methoxycinnamate	对甲氧基肉桂酸乙酯	Phenolic acids	酚酸类	Phenolic acids	酚酸类	24393-56-4	3	-	-	-	141107	152136	156024	61161.1	95202.3	92087.6	67929.2	78309	73196.7	99061.3	110435	92986.3	-	-	-	-
MWSslk006	UPLC-MS/MS	197.08	65.04	-	-	196.074	C10H12O4	[M+H]+	Ethyl Vanillate	香草酸乙酯	Phenolic acids	酚酸类	Phenolic acids	酚酸类	617-05-0	3	-	-	-	5171.64	5171.64	5171.64	5171.64	5171.64	5171.64	87160.5	89483.9	93069.4	25858.2	40101.2	50660.4	-	-	-	-
Hmmp003752	UPLC-MS/MS	771.27	325.09	-	-	770.263	C35H46O19	[M+H]+	Poliumoside	金石蚕苷	Phenolic acids	酚酸类	Phenolic acids	酚酸类	94079-81-9	3	-	-	-	334813	272230	277657	420708	304175	166600	268002	193156	129823	246307	215163	299305	-	-	-	-
Cmyp005062	UPLC-MS/MS	407.13	245.08	-	-	406.126	C20H22O9	[M+H]+	Salireposide	柳匍匐苷	Phenolic acids	酚酸类	Phenolic acids	酚酸类	16955-55-8	3	-	-	-	907510	1.09458e+06	835495	52603.7	46782.5	55095.1	9356.49	9356.49	9356.49	298714	318554	298464	-	-	-	-
MWSmce632	UPLC-MS/MS	195.06	93.03	-	-	194.058	C10H10O4	[M+H]+	Vanillin acetate	香兰素乙酸酯	Phenolic acids	酚酸类	Phenolic acids	酚酸类	881-68-5	3	-	-	-	94651.6	122016	113226	124349	142769	142159	142439	140613	151795	151185	126765	135448	-	-	-	-
Zmcp102202	UPLC-MS/MS	205.086	149.023	-	-	204.079	C12H12O3	[M+H]+	Senkyunolide C	川芎内酯酚 C	Phenolic acids	酚酸类	Phenolic acids	酚酸类	-	3	-	-	-	7.93947e+06	8.66071e+06	8.3382e+06	9.26376e+06	9.43953e+06	9.18658e+06	2.14199e+07	2.34102e+07	2.19127e+07	1.60871e+07	1.51027e+07	1.56741e+07	-	-	-	-
Lmsn003628	UPLC-MS/MS	547.17	223.06	-	-	548.174	C23H32O15	[M-H]-	6'-O-Sinapoylsucrose	6'-O-芥子酰蔗糖	Phenolic acids	酚酸类	Phenolic acids	酚酸类	-	1	-	-	-	35291.8	69684.5	51946.9	130326	156618	149981	93055.7	104863	74632.6	76448.8	85268.8	73508.8	-	-	-	-
pmn001511	UPLC-MS/MS	285.1	123.05	-	-	286.105	C13H18O7	[M-H]-	3-Hydroxy-5-Methylphenol-1-O-Glucoside	3-羟基-5-甲基苯酚-1-氧-葡萄糖苷	Phenolic acids	酚酸类	Phenolic acids	酚酸类	-	1	-	-	-	72101.3	72877.1	85181.4	138734	202057	124140	9.18342e+06	1.10761e+07	1.12651e+07	5.52489e+06	5.0953e+06	5.29932e+06	-	-	-	-
Lmzn001582	UPLC-MS/MS	387.17	207.1	-	-	388.173	C18H28O9	[M-H]-	5'-Glucosyloxyjasmanic acid	5'-葡萄糖基氧代茉莉酸	Phenolic acids	酚酸类	Phenolic acids	酚酸类	-	1	-	-	-	9.82465e+06	1.14873e+07	1.04058e+07	5.11901e+07	5.09132e+07	5.77648e+07	4.68391e+07	4.40094e+07	4.44227e+07	3.49782e+07	3.77182e+07	3.77711e+07	-	-	-	-
Lakn002165	UPLC-MS/MS	447.12	152.01	-	-	448.122	C18H24O13	[M-H]-	Protocatechuic acid glucosyl xyloside	原儿茶酸葡萄糖基木糖苷	Phenolic acids	酚酸类	Phenolic acids	酚酸类	-	1	-	-	-	7.56176e+06	7.91888e+06	7.76533e+06	8.16334e+06	7.36622e+06	8.70198e+06	2.96879e+06	3.04235e+06	3.21643e+06	5.61852e+06	5.52214e+06	6.15432e+06	-	-	-	-
Lakn002368	UPLC-MS/MS	313.09	107.05	-	-	314.1	C14H18O8	[M-H]-	2-Hydroxy-5-methylbenzoyl-1-O-glucose*	2-羟基-5-甲基苯甲酰基-1-O-葡萄糖*	Phenolic acids	酚酸类	Phenolic acids	酚酸类	-	1	-	-	-	138367	201735	220074	588196	803743	801929	4.68486e+06	4.36007e+06	4.3542e+06	2.52407e+06	2.27613e+06	2.41951e+06	-	-	-	-
Lmhn003373	UPLC-MS/MS	253.04	137.02	-	-	254.043	C11H10O7	[M-H]-	4-Hydroxybenzoylmalic acid	4-羟基苯甲酰苹果酸	Phenolic acids	酚酸类	Phenolic acids	酚酸类	-	1	-	-	-	6.84217e+06	9.16562e+06	7.78041e+06	2.73867e+07	2.77292e+07	2.94588e+07	2.29773e+07	2.28757e+07	2.35942e+07	2.26023e+07	1.86411e+07	1.89466e+07	-	-	-	-
MWSmce675	UPLC-MS/MS	271.08	108.02	-	-	272.09	C12H16O7	[M-H]-	Arbutin	熊果苷	Phenolic acids	酚酸类	Phenolic acids	酚酸类	497-76-7	1	-	-	-	8316.83	24414.6	31694	80905.6	91954.1	82673.3	165857	206885	218421	94455.7	92993.5	114795	C06186	ko00010	C06186	-
Wmcn000039	UPLC-MS/MS	461.17	135.04	-	-	462.174	C20H30O12	[M-H]-	decaffeoylverbascoside	去咖啡酰基类叶升麻苷	Phenolic acids	酚酸类	Phenolic acids	酚酸类	-	1	-	-	-	2.09964e+07	2.14435e+07	2.40239e+07	4.60852e+07	4.72466e+07	4.9163e+07	2.93031e+07	2.71945e+07	2.44752e+07	2.64898e+07	3.49805e+07	3.63028e+07	-	-	-	-
Jmwn002172	UPLC-MS/MS	315.11	135.04	-	-	316.116	C14H20O8	[M-H]-	3,4-dihydroxyphenylethanol-β-D-glucopyranoside*	3,4-二羟基苯乙醇-β-D-吡喃葡萄糖苷*	Phenolic acids	酚酸类	Phenolic acids	酚酸类	-	1	-	-	-	141148	168616	210234	163064	135782	27156.4	233925	295601	263186	241551	250768	182528	-	-	-	-
Jmwn002057	UPLC-MS/MS	477.16	315.11	-	-	478.169	C20H30O13	[M-H]-	2-(3-β-D-glucopyranosyloxy-4-hydroxyphenyl)ethanol-1-O-β-D-glucopyranoside	2-(3-β-D-吡咯烷氧基-4-羟基苯基)乙醇-1-O-β-D-吡喃葡萄糖苷	Phenolic acids	酚酸类	Phenolic acids	酚酸类	-	1	-	-	-	1.35053e+07	1.38905e+07	1.6629e+07	7.88024e+06	7.74255e+06	7.26606e+06	9.46451e+06	9.6654e+06	1.05932e+07	1.09642e+07	1.15172e+07	1.08691e+07	-	-	-	-
Zaln004082	UPLC-MS/MS	335.08	179.03	-	-	336.084	C16H16O8	[M-H]-	3-O-caffeoylshikimic acid	3-O-咖啡酰莽草酸	Phenolic acids	酚酸类	Phenolic acids	酚酸类	-	1	-	-	-	25479.6	5095.91	5095.91	84571.6	89021.1	91250.9	1.08508e+06	1.25936e+06	1.19613e+06	653146	573034	688750	-	-	-	-
pme0282	UPLC-MS/MS	165.02	77.04	-	-	166.027	C8H6O4	[M-H]-	Phthalic acid	邻苯二甲酸	Phenolic acids	酚酸类	Phenolic acids	酚酸类	88-99-3	1	-	-	-	334369	378107	340707	234026	297714	290631	356761	341806	377060	309766	318896	320504	C01606	ko01100,ko02010	C01606	-
Ymjm000152	UPLC-MS/MS	271.08	108.02	-	-	272.09	C12H16O7	[M-H]-	p-Hydroxypheny-β-D-allopyranoside	对羟基苯-β-D-阿洛糖苷	Phenolic acids	酚酸类	Phenolic acids	酚酸类	-	1	-	-	-	23873.2	29096.8	38795.5	116875	119484	146271	265675	292189	313803	142715	175237	148140	-	-	-	-
Lmgn003073	UPLC-MS/MS	735.22	367.11	-	-	368.111	C17H20O9	[2M-H]-	5-O-Feruloylquinic acid	5-O-阿魏酰奎尼酸	Phenolic acids	酚酸类	Phenolic acids	酚酸类	-	1	-	-	-	210559	210559	210559	210559	210559	210559	9.57674e+06	6.04427e+06	5.29884e+06	1.0528e+06	1.56496e+06	1.10983e+06	-	-	-	-
Labn004481	UPLC-MS/MS	459.11	153.02	-	-	460.122	C19H24O13	[M-H]-	Gentisic acid-[6''-(3-hydroxy-3-methylglutaryl)]-glucoside	龙胆酸-6''-β-羟基-β-甲基戊二酸半酯葡萄糖苷	Phenolic acids	酚酸类	Phenolic acids	酚酸类	-	1	-	-	-	136358	245007	227192	2.28873e+06	2.21699e+06	2.41044e+06	254780	268740	222208	894257	838773	807586	-	-	-	-
Sakn004616	UPLC-MS/MS	609.19	447.15	-	-	610.19	C28H34O15	[M-H]-	Conandroside	苦苣苔苷	Phenolic acids	酚酸类	Phenolic acids	酚酸类	-	1	-	-	-	867213	1.0825e+06	1.07413e+06	2.74519e+06	3.49977e+06	3.29466e+06	4.10133e+06	5.446e+06	4.92998e+06	3.16465e+06	3.31865e+06	2.80238e+06	-	-	-	-
Zbfn002690	UPLC-MS/MS	299.08	93.03	-	-	300.084	C13H16O8	[M-H]-	1-(4-Hydroxybenzoyl)Glucose; 25545-07-7	1-(4-羟基苯甲酰基)葡萄糖	Phenolic acids	酚酸类	Phenolic acids	酚酸类	-	1	-	-	-	3.96826e+06	4.80229e+06	6.22864e+06	4.27508e+07	5.46832e+07	5.80828e+07	2.92678e+07	3.40499e+07	3.28229e+07	2.93006e+07	2.82889e+07	2.83941e+07	-	-	-	-
mws0178	UPLC-MS/MS	353.09	191.06	-	-	354.095	C16H18O9	[M-H]-	Chlorogenic acid (3-O-Caffeoylquinic acid)*	绿原酸 (3-O-咖啡酰奎宁酸)*	Phenolic acids	酚酸类	Phenolic acids	酚酸类	327-97-9	1	-	-	-	972095	972095	972095	4.86047e+06	5.58233e+06	5.94456e+06	1.96414e+07	4.25981e+07	5.27747e+07	1.03268e+07	7.47329e+06	8.50095e+06	C00852	ko00940,ko00941,ko00945,ko01110	C00852	-
Wasn003200	UPLC-MS/MS	385.08	209.03	-	-	386.085	C16H18O11	[M-H]-	O-Feruloylgalactaric acid	O-阿魏酰半乳糖酸	Phenolic acids	酚酸类	Phenolic acids	酚酸类	-	1	-	-	-	3.83167e+06	4.0987e+06	4.14803e+06	256147	3.81268e+06	1.75507e+06	1.36779e+06	373120	1.33191e+06	1.07685e+06	1.82415e+06	2.34238e+06	C03156	-	C03156	-
Hmhn003067	UPLC-MS/MS	325.09	119.05	-	-	326.1	C15H18O8	[M-H]-	Phenylpropionic acid-O-β-D-glucopyranoside	苯基丙酸-O-β-D-吡喃葡萄糖苷	Phenolic acids	酚酸类	Phenolic acids	酚酸类	-	1	-	-	-	450811	697774	785309	3.01162e+06	3.67677e+06	3.27754e+06	1.10905e+07	1.25589e+07	1.24362e+07	6.58167e+06	6.18944e+06	8.17815e+06	-	-	-	-
Zbfn002396	UPLC-MS/MS	343.1	163.04	-	-	344.111	C15H20O9	[M-H]-	Caffeoyl-O-mannitol	咖啡酰-O-甘露糖醇	Phenolic acids	酚酸类	Phenolic acids	酚酸类	-	1	-	-	-	400910	606871	663929	2.52396e+06	2.56177e+06	2.79267e+06	1.82329e+06	1.99009e+06	1.81259e+06	1.91297e+06	1.71492e+06	1.76503e+06	-	-	-	-
Sacn004878	UPLC-MS/MS	639.19	477.16	-	-	640.2	C29H36O16	[M-H]-	Orobanchoside	列当苷	Phenolic acids	酚酸类	Phenolic acids	酚酸类	-	1	-	-	-	95632.1	156230	89916.1	635525	719869	754972	380070	409835	321224	576671	616490	485858	-	-	-	-
mws0183	UPLC-MS/MS	153.02	109.03	-	-	154.027	C7H6O4	[M-H]-	3,4-Dihydroxybenzoic acid (Protocatechuic acid)*	3,4-二羟基苯甲酸; 原儿茶酸*	Phenolic acids	酚酸类	Phenolic acids	酚酸类	99-50-3	1	-	-	-	734044	864295	734913	1.71462e+06	1.76315e+06	1.53823e+06	2.06175e+06	2.00184e+06	1.838e+06	1.26042e+06	1.22544e+06	1.27901e+06	C00230	ko00400,ko01100,ko01110	C00230	-
MWSmce501	UPLC-MS/MS	167.04	108.02	-	-	168.042	C8H8O4	[M-H]-	Protocatechuic Acid Methyl Ester	原儿茶酸甲酯	Phenolic acids	酚酸类	Phenolic acids	酚酸类	2150-43-8	1	-	-	-	250402	226474	247239	680692	713511	651520	6.40841e+06	5.82041e+06	6.05723e+06	2.13186e+06	2.61195e+06	2.22586e+06	-	-	-	-
Lmln010063	UPLC-MS/MS	205.16	189.13	-	-	206.167	C14H22O	[M-H]-	2,6-Di-tert-butylphenol*	2,6-二叔丁基苯酚*	Phenolic acids	酚酸类	Phenolic acids	酚酸类	128-39-2	1	-	-	-	454435	444775	400940	557551	494504	570711	616662	416219	553950	411578	396454	385838	-	-	-	-
Hmhn000927	UPLC-MS/MS	287.08	125.02	-	-	288.084	C12H16O8	[M-H]-	Phloroglucinol-1-O-β-D-glucopyranoside	间苯三酚-1-O-β-D-吡喃葡萄糖苷	Phenolic acids	酚酸类	Phenolic acids	酚酸类	-	1	-	-	-	13142.1	13142.1	13142.1	65710.3	66477.2	93602.8	175018	294554	229839	151218	132088	176393	-	-	-	-
mws1506	UPLC-MS/MS	639.19	161.02	-	-	640.2	C29H36O16	[M-H]-	Plantamajoside	大车前苷	Phenolic acids	酚酸类	Phenolic acids	酚酸类	104777-68-6	1	-	-	-	7.85499e+06	1.20818e+07	1.2222e+07	1.37306e+07	9.26905e+06	1.20435e+07	2.05611e+07	1.75439e+07	1.67461e+07	1.4467e+07	1.01442e+07	1.5101e+07	C10485	-	C10485	-
Lmxn007578	UPLC-MS/MS	735.25	175.04	-	-	736.258	C35H44O17	[M-H]-	Clerodenoside A; 2'',3''-Diacetylmartynoside	2'',3''-二-O-乙酰基地黄苷	Phenolic acids	酚酸类	Phenolic acids	酚酸类	164022-75-7	1	-	-	-	4.58007e+06	5.84363e+06	4.10899e+06	1.07025e+06	1.01895e+06	979874	25832.7	37999.6	29513.2	1.52816e+06	1.79958e+06	1.3242e+06	-	-	-	-
Hmsn002598	UPLC-MS/MS	301.09	139.04	-	-	302.1	C13H18O8	[M-H]-	Salirepin	柳匍匐次苷	Phenolic acids	酚酸类	Phenolic acids	酚酸类	26652-12-0	1	-	-	-	166708	209376	312626	499191	619843	642538	1.63612e+07	1.82534e+07	2.04243e+07	1.01543e+07	1.01562e+07	9.56677e+06	-	-	-	-
Lmgn002253	UPLC-MS/MS	695.2	353.09	-	-	696.19	C31H36O18	[M-H]-	Syringoylcaffeoylquinic acid-D-glucose	丁香酰咖啡酰奎宁酸葡萄糖	Phenolic acids	酚酸类	Phenolic acids	酚酸类	-	1	-	-	-	25455.1	22300.5	44051.7	1.10297e+06	937680	1.43985e+06	1.20602e+07	1.13094e+07	1.51944e+07	7.00935e+06	6.57959e+06	7.40895e+06	-	-	-	-
Lmhn003240	UPLC-MS/MS	237.04	121.03	-	-	238.048	C11H10O6	[M-H]-	Benzoylmalic acid	苯甲酰苹果酸	Phenolic acids	酚酸类	Phenolic acids	酚酸类	22138-51-8	1	-	-	-	4.07489e+06	5.41295e+06	4.03112e+06	2.3119e+07	2.43636e+07	2.41532e+07	3.15196e+07	3.87979e+07	3.30974e+07	2.39494e+07	2.55633e+07	1.95953e+07	-	-	-	-
Qmdp112405	UPLC-MS/MS	349.271	293.207	-	-	348.266	C22H36O3	[M+H]+	Viteagnusin A	Viteagnusin A	Terpenoids	萜类	Ditepenoids	二萜	-	3	-	-	-	14224	14722.6	17111.4	28598.9	28135.7	26670.5	57568.4	42527.4	32482	33496.2	27865	30826.5	-	-	-	-
MWSHC20168	UPLC-MS/MS	153.02	109.03	-	-	154.027	C7H6O4	[M-H]-	Methyl cumalate*	香豆酸甲酯*	Phenolic acids	酚酸类	Phenolic acids	酚酸类	6018-41-3	1	-	-	-	399127	384240	387928	863362	834598	936360	1.01008e+06	1.01146e+06	940497	720092	659013	612218	-	-	-	-
Lckn000311	UPLC-MS/MS	651.23	175.04	-	-	652.237	C31H40O15	[M-H]-	3-hydroxy-4-methoxy-β-phenylethoxy-O-α-L-rhamnopyranosyl-(1→3)-4-O-feruloyl(trans)-β-D-glucopyranoside*	3-羟基-4-甲氧基-β-苯基乙氧基-O-α-L-吡喃鼠李糖基-(1→3)-4-O-阿魏酰基(反式)-β-D-吡喃葡萄糖苷*	Phenolic acids	酚酸类	Phenolic acids	酚酸类	-	1	-	-	-	8.43865e+06	1.03516e+07	8.66095e+06	7.13927e+06	6.99725e+06	9.77744e+06	1.964e+06	1.50422e+06	1.69255e+06	5.76203e+06	5.38392e+06	4.75202e+06	-	-	-	-
Wafn002874	UPLC-MS/MS	515.14	323.08	-	-	516.148	C22H28O14	[M-H]-	4-O-(4'-O-alpha-D-Glucopyranosyl)caffeoylquinic acid	4-O-(4'-O-α-D-吡喃葡萄糖基)咖啡酰奎尼酸	Phenolic acids	酚酸类	Phenolic acids	酚酸类	1401352-62-2	1	-	-	-	24374.9	24374.9	24374.9	130587	126052	121875	2.48067e+06	2.26424e+06	2.40658e+06	949291	1.03089e+06	828705	-	-	-	-
Lmdn004491	UPLC-MS/MS	651.23	175.04	-	-	652.237	C31H40O15	[M-H]-	Martynoside*	地黄苷; 角胡麻苷*	Phenolic acids	酚酸类	Phenolic acids	酚酸类	67884-12-2	1	-	-	-	7.81596e+06	1.10615e+07	8.99653e+06	7.1652e+06	7.55161e+06	7.7727e+06	1.65091e+06	1.52458e+06	1.86438e+06	8.76585e+06	5.55942e+06	7.0187e+06	-	-	-	-
Zmhn000892	UPLC-MS/MS	301.09	139.05	-	-	302.1	C13H18O8	[M-H]-	4-O-Glucosyl-3,4-dihydroxybenzyl alcohol	4-O-葡萄糖基-3,4-二羟基苄醇	Phenolic acids	酚酸类	Phenolic acids	酚酸类	-	1	-	-	-	717173	977148	1.2311e+06	2.22278e+06	2.55935e+06	2.59765e+06	1.26372e+07	1.05883e+07	9.75098e+06	2.05553e+07	1.99552e+07	1.64354e+07	-	-	-	-
Hmhn002787	UPLC-MS/MS	443.19	161.04	-	-	444.2	C21H32O10	[M-H]-	(1'R,3R,5R,8'S)-Dihydrophaseic acid-O-β-D-glucoside	(1'R,3R,5R,8'S)-二氢红花菜豆酸-O-β-D-吡喃葡萄糖苷	Phenolic acids	酚酸类	Phenolic acids	酚酸类	-	1	-	-	-	57230.6	78992.7	104791	116990	112381	156291	197340	278363	213300	139894	193842	139923	-	-	-	-
Labn003679	UPLC-MS/MS	327.11	147.05	-	-	328.116	C15H20O8	[M-H]-	Caffeyl alcohol 4-O-β-D-glucopyranoside	咖啡醇 4-O-β-D-葡萄糖苷	Phenolic acids	酚酸类	Phenolic acids	酚酸类	-	1	-	-	-	39954.7	48977.2	69754.7	1.70688e+06	1.56093e+06	1.51152e+06	1.26811e+06	1.24156e+06	1.21439e+06	732764	1.27442e+06	794699	-	-	-	-
Lmhn002573	UPLC-MS/MS	399.09	205.04	-	-	400.101	C17H20O11	[M-H]-	Sinapoylglucuronic acid	芥子酰葡萄糖醛酸	Phenolic acids	酚酸类	Phenolic acids	酚酸类	-	1	-	-	-	542495	478930	622169	2.77988e+06	2.92415e+06	3.33785e+06	770038	1.03334e+06	1.02859e+06	1.38928e+06	1.30629e+06	1.34237e+06	-	-	-	-
Lckn000312	UPLC-MS/MS	623.2	161.03	-	-	624.205	C29H36O15	[M-H]-	3,4-dihydroxy-β-phenylethoxy-O-α-L-rhamnopyranosyl(1→3)-6-O-caffeoyl(cis)-β-D-glucopyranoside*	3,4-二羟基-β-苯基乙氧基-O-α-L-吡喃鼠李糖(1→3)-6-O-咖啡酰基(顺式)-β-D-吡喃葡萄糖*	Phenolic acids	酚酸类	Phenolic acids	酚酸类	-	1	-	-	-	1.69841e+06	1.9212e+06	2.61215e+06	2.89907e+06	3.28756e+06	3.32517e+06	1.97858e+06	2.13064e+06	2.36808e+06	1.54981e+06	1.80195e+06	1.54586e+06	-	-	-	-
Lmzn001983	UPLC-MS/MS	375.13	135.05	-	-	376.137	C16H24O10	[M-H]-	D-Threo-guaiacylglycerol-7-O-β-D-glucoside	D-苏式-愈创木基甘油-7-O-β-D-葡萄糖苷	Phenolic acids	酚酸类	Phenolic acids	酚酸类	-	1	-	-	-	104841	144570	91397.1	133261	132902	163377	449447	401269	364881	249237	226801	262250	-	-	-	-
Zbfn005212	UPLC-MS/MS	609.18	193.05	-	-	610.19	C28H34O15	[M-H]-	2-(3,4-dihydroxyphenylmethyl)-6-feruloyl-O-glucosyl-D-xylose	2-(3,4-二羟基苯甲基)-6-阿魏酰-O-葡萄糖基-D-木糖	Phenolic acids	酚酸类	Phenolic acids	酚酸类	-	1	-	-	-	166276	259235	233723	977974	1.14225e+06	1.15814e+06	211750	268887	337126	652568	537443	403207	-	-	-	-
Qmdp112404	UPLC-MS/MS	349.271	179.142	-	-	348.266	C22H36O3	[M+H]+	Viteagnusin B*	Viteagnusin B*	Terpenoids	萜类	Ditepenoids	二萜	-	3	-	-	-	38976	46560.6	33727.9	62504	53984.6	54016.4	111472	123634	91722.1	67101.8	79278.7	70079.9	-	-	-	-
Hmsn002272	UPLC-MS/MS	327.11	165.05	-	-	328.116	C15H20O8	[M-H]-	Demethyl coniferin	去甲松柏苷	Phenolic acids	酚酸类	Phenolic acids	酚酸类	-	1	-	-	-	739626	626385	1.21737e+06	5.20621e+06	6.11024e+06	7.16423e+06	8.65618e+06	6.47566e+06	7.43233e+06	5.05915e+06	4.547e+06	5.12553e+06	-	-	-	-
Wabn003563	UPLC-MS/MS	385.11	179.07	-	-	386.121	C17H22O10	[M-H]-	3'-O-Beta-D-Glucopyranosyl plumbagic acid	3'-O-葡萄糖基白花丹酸	Phenolic acids	酚酸类	Phenolic acids	酚酸类	-	1	-	-	-	274038	395623	290440	2.82462e+06	3.05117e+06	2.73519e+06	1.72169e+07	2.19754e+07	1.97155e+07	9.76306e+06	1.01084e+07	7.24393e+06	-	-	-	-
Lakn000379	UPLC-MS/MS	665.22	383.12	-	-	666.237	C28H42O18	[M-H]-	2,5-Dihydroxyphenylacetate ethyl triglucoside	2,5-二羟基苯乙酸乙酯三葡萄糖苷	Phenolic acids	酚酸类	Phenolic acids	酚酸类	-	1	-	-	-	6.31822e+06	5.83106e+06	8.06113e+06	315062	261954	247349	332377	338301	263138	1.22934e+06	1.14287e+06	1.24962e+06	-	-	-	-
Lacn003532	UPLC-MS/MS	387.09	139.04	-	-	388.101	C16H20O11	[M-H]-	Malonyl Tachioside	丙二酰它乔糖苷	Phenolic acids	酚酸类	Phenolic acids	酚酸类	-	2	-	-	-	722019	956620	860790	505198	522121	579358	2.48941e+06	1.97618e+06	2.22963e+06	1.79179e+06	1.63845e+06	1.41651e+06	-	-	-	-
Zbln004255	UPLC-MS/MS	653.21	487.15	-	-	654.222	C30H38O16	[M-H]-	2-(3-Hydroxy-4-methoxyphenethyl)-5-O-(2-hydroxycaffeoyl)-gentiobioside	2-(3-羟基-4-甲氧基苯乙醇)-5-O-(2-羟基咖啡酰)-龙胆二糖苷	Phenolic acids	酚酸类	Phenolic acids	酚酸类	-	2	-	-	-	7.08055e+06	6.24019e+06	9.24291e+06	7.0576e+06	1.02945e+07	1.04777e+07	1.31457e+07	1.33167e+07	1.15317e+07	1.0714e+07	8.7618e+06	1.21764e+07	-	-	-	-
Sazp001763	UPLC-MS/MS	357.12	195.07	-	-	358.126	C16H22O9	[M-H]-	4-Hydroxyphenyl 6-O-(2-Methyl-3-Hydroxypropionyl)-Beta-D-Galactopyranoside	4-羟基苯基 6-O-(2-甲基-3-羟基丙酰基)-β-D-吡喃半乳糖苷	Phenolic acids	酚酸类	Phenolic acids	酚酸类	-	2	-	-	-	192716	233525	286459	240574	232584	291171	313744	389577	416602	280128	317463	285764	-	-	-	-
Sakn002857	UPLC-MS/MS	447.15	315.11	-	-	448.158	C19H28O12	[M-H]-	3,4-Dihydroxyphenethyl alcohol-8-O-[β-D-apinosyl(1→3)]-β-D-glucoside	3,4-二羟基苯乙醇-8-O-[β-D-芹糖基(1→3)]-β-D-葡糖苷	Phenolic acids	酚酸类	Phenolic acids	酚酸类	-	2	-	-	-	3.13559e+06	3.649e+06	3.46222e+06	2.58971e+06	2.73567e+06	2.47131e+06	1.44906e+06	1.48239e+06	1.31977e+06	2.25367e+06	2.18202e+06	1.89586e+06	-	-	-	-
Wayn001856	UPLC-MS/MS	379.03	241	-	-	380.041	C13H16O11S	[M-H]-	4-Hydroxybenzoic acid 4-(6-O-sulfo)glucopyranoside	4-羟基苯甲酸 4-(6-O-磺酸基)吡喃葡萄糖苷	Phenolic acids	酚酸类	Phenolic acids	酚酸类	-	2	-	-	-	654846	952993	1.00479e+06	116969	108387	138100	986540	1.13989e+06	1.02889e+06	626820	679904	646332	-	-	-	-
WaYn004730	UPLC-MS/MS	397.15	137.02	-	-	398.158	C19H26O9	[M-H]-	[(1R,2R)-cyclohexane-1,2-diol]2-O-(6''-O-p-Hydroxybenzoyl)Glucoside	[(1R,2R)-环己烷-1,2-二醇]2-O-(6''-O-对羟基苯甲酰)葡萄糖苷	Phenolic acids	酚酸类	Phenolic acids	酚酸类	-	2	-	-	-	6535.2	6535.2	32676	39671.1	56425.9	44986.9	1.30209e+06	1.463e+06	1.43496e+06	937281	915054	835281	-	-	-	-
Zbfn005127	UPLC-MS/MS	623.2	447.15	-	-	624.205	C29H36O15	[M-H]-	4-O-Galactosyl-D-Xylose	2-(3,4-二羟基苯乙氧基)6-阿魏酰-O-葡萄糖基-D-木糖	Phenolic acids	酚酸类	Phenolic acids	酚酸类	-	2	-	-	-	200130	150597	255323	565561	497535	566640	8.54462e+06	7.36789e+06	8.92285e+06	4.59248e+06	2.85563e+06	3.8694e+06	-	-	-	-
Hmtn001120	UPLC-MS/MS	315.11	153.06	-	-	316.116	C14H20O8	[M-H]-	5-(2-Hydroxyethyl)-2-O-glucosylphenol	5-(2-羟乙基)-2-O-葡萄糖基苯酚	Phenolic acids	酚酸类	Phenolic acids	酚酸类	-	2	-	-	-	1.43272e+07	1.83219e+07	2.54277e+07	5.15449e+07	5.88575e+07	6.17572e+07	4.65525e+07	5.0635e+07	5.6007e+07	3.16044e+07	3.12107e+07	3.18444e+07	-	-	-	-
Hmln000873	UPLC-MS/MS	331.07	169.01	-	-	332.074	C13H16O10	[M-H]-	2-O-Galloyl-D-glucose	2-O-没食子酰-D-葡萄糖	Phenolic acids	酚酸类	Phenolic acids	酚酸类	-	2	-	-	-	1.81535e+06	2.71492e+06	3.36718e+06	7.90763e+06	7.69588e+06	9.30138e+06	8.67655e+06	4.34425e+06	9.64362e+06	8.65162e+06	4.12289e+06	8.42108e+06	-	-	-	-
Zmln000899	UPLC-MS/MS	343.11	181.05	-	-	344.111	C15H20O9	[M-H]-	Syringaldehyde-4-O-glucoside	丁香醛-4-O-葡萄糖苷	Phenolic acids	酚酸类	Phenolic acids	酚酸类	-	2	-	-	-	83094.7	43910.3	212516	888529	1.04344e+06	900544	901178	992633	1.17373e+06	837306	819421	959693	-	-	-	-
Sacn002893	UPLC-MS/MS	403.12	223.06	-	-	404.132	C17H24O11	[M-H]-	10-acetylmonomelittoside	10-羟基单密力特苷	Phenolic acids	酚酸类	Phenolic acids	酚酸类	-	2	-	-	-	928953	855587	1.10566e+06	753107	818812	789423	721941	703442	693436	857158	932717	853438	-	-	-	-
Lmsn002288	UPLC-MS/MS	503.14	341.09	-	-	504.148	C21H28O14	[M-H]-	1-O-Caffeoyl-(6-O-glucosyl)-β-D-glucose	1-O-咖啡酰-6-O-葡萄糖基-β-D-葡萄糖	Phenolic acids	酚酸类	Phenolic acids	酚酸类	-	2	-	-	-	52787	100215	75181.9	181400	259392	189906	435332	481618	501652	320843	334473	313801	-	-	-	-
Zbln005189	UPLC-MS/MS	607.2	461.17	-	-	608.211	C29H36O14	[M-H]-	2-(3,4-Dihydroxyphenethyl)-5-O-Cinnamoyl-gentiobioside	2-(3,4-二羟基-苯乙醇苷)-5-O-肉桂酰-龙胆二糖苷	Phenolic acids	酚酸类	Phenolic acids	酚酸类	-	2	-	-	-	315345	352142	390680	487144	537613	576294	1.25097e+06	1.65513e+06	1.43724e+06	862415	1.10762e+06	735802	-	-	-	-
Zmln000668	UPLC-MS/MS	493.12	169.01	-	-	494.127	C19H26O15	[M-H]-	Monogalloyl-diglucose	单没食子酰-二葡萄糖苷	Phenolic acids	酚酸类	Phenolic acids	酚酸类	-	2	-	-	-	11553.9	11553.9	11553.9	87885.3	87894.6	112400	109881	91775.8	109453	65681	57769.5	72702.2	-	-	-	-
Lakn003294	UPLC-MS/MS	343.1	181.05	-	-	344.111	C15H20O9	[M-H]-	2-β-D-Glucopyranosyloxy-5-hydroxyphenylacetic acidmethylester*	2-β-D-吡喃葡萄糖氧基-5-羟基苯乙酸甲酯*	Phenolic acids	酚酸类	Phenolic acids	酚酸类	-	2	-	-	-	1.71371e+06	1.85282e+06	2.47922e+06	4.20209e+06	7.33018e+06	6.78095e+06	2.0457e+06	1.25832e+06	1.2036e+06	1.99529e+06	1.33387e+06	1.78165e+06	-	-	-	-
Zmhn001793	UPLC-MS/MS	341.09	179.03	-	-	342.095	C15H18O9	[M-H]-	6-O-Caffeoyl-D-glucose	6-O-咖啡酰-D-葡萄糖	Phenolic acids	酚酸类	Phenolic acids	酚酸类	-	2	-	-	-	3.34988e+06	3.89776e+06	5.15336e+06	8.20215e+06	1.18111e+07	1.42753e+07	3.38059e+06	3.11821e+06	5.1356e+06	4.00418e+06	4.11145e+06	5.00417e+06	-	-	-	-
Labn002833	UPLC-MS/MS	417.14	123.05	-	-	418.147	C18H26O11	[M-H]-	2-(Hydroxymethyl)Phenyl 6-O-Beta-D-Xylopyranosyl-Beta-D-Glucopyranoside	2-(羟甲基)苯基 6-O-β-D-吡喃木糖基-β-D-吡喃葡萄糖苷	Phenolic acids	酚酸类	Phenolic acids	酚酸类	-	2	-	-	-	160738	189279	158320	83335.9	82407.6	90769.1	2.75136e+06	2.74889e+06	2.72801e+06	1.32458e+06	1.38036e+06	1.23949e+06	-	-	-	-
Zbjn003642	UPLC-MS/MS	499.15	191.06	-	-	500.155	C22H28O13	[M-H]-	1-O-rhamnose-3-O-Caffeoyl Quinic Acid	1-O-鼠李糖-3-O-咖啡酰奎宁酸	Phenolic acids	酚酸类	Phenolic acids	酚酸类	-	2	-	-	-	46987.7	43411.6	99441.2	55450	45322.9	64095.6	1.15246e+06	1.08501e+06	1.15445e+06	475838	596861	524490	-	-	-	-
Labn003067	UPLC-MS/MS	329.09	135.01	-	-	330.095	C14H18O9	[M-H]-	salicylate-6-O-β-D-glucopyranosylbenzoic acid	水杨酸甲酯-6-O-β-D-吡喃葡萄糖苷	Phenolic acids	酚酸类	Phenolic acids	酚酸类	-	2	-	-	-	21814.1	21814.1	21814.1	382207	370230	490489	21814.1	21814.1	21814.1	218354	109071	248986	-	-	-	-
Lmgn002250	UPLC-MS/MS	677.17	191.06	-	-	678.18	C31H34O17	[M-H]-	Dicaffeoylquinic acid-O-glucoside	二咖啡酰基奎宁酸-O-葡萄糖苷	Phenolic acids	酚酸类	Phenolic acids	酚酸类	-	2	-	-	-	36224.4	71728	70744.8	145831	152698	132857	374946	398336	719213	935721	930406	1.17561e+06	-	-	-	-
Hmhn003518	UPLC-MS/MS	355.1	175.04	-	-	356.111	C16H20O9	[M-H]-	4-O-β-D-glucopyranosylferulic acid	4-O-β-D-葡萄糖基阿魏酸	Phenolic acids	酚酸类	Phenolic acids	酚酸类	-	2	-	-	-	143070	209554	279141	263889	253192	334459	692249	755982	692817	539573	573424	530347	-	-	-	-
WaYn005032	UPLC-MS/MS	461.11	315.07	-	-	462.116	C22H22O11	[M-H]-	Gentisic acid 2-O-(6''-O-p-coumaroyl)Glucoside*	龙胆酸 2-O-(6''-O-p-香豆酰)葡糖苷*	Phenolic acids	酚酸类	Phenolic acids	酚酸类	-	2	-	-	-	1.51341e+06	1.74987e+06	1.44453e+06	1.20917e+06	1.01348e+06	1.22678e+06	245591	186800	245678	804119	824662	781764	-	-	-	-
Wasn002933	UPLC-MS/MS	373.11	211.06	-	-	374.121	C16H22O10	[M-H]-	1-O-(3,4,5-Trimethoxybenzoyl)-B-D-Glucopyranoside	1-O-(3,4,5-三甲氧基苯甲酰基)-B-D-吡喃葡萄糖苷	Phenolic acids	酚酸类	Phenolic acids	酚酸类	-	2	-	-	-	1.21806e+06	1.29561e+06	1.50648e+06	847120	862055	921937	1.35122e+06	1.4427e+06	1.50143e+06	1.46033e+06	1.2105e+06	1.34309e+06	-	-	-	-
Zbjn003801	UPLC-MS/MS	691.18	353.09	-	-	692.195	C32H36O17	[M-H]-	1-O-(6'-O-feruloyl)glucoside-3-O-Caffeoyl Quinic Acid	1-O-(6'-O-阿魏酰)葡萄糖苷-3-O-咖啡酰奎尼酸	Phenolic acids	酚酸类	Phenolic acids	酚酸类	-	2	-	-	-	37705	53056.8	52987.5	97817.2	131417	128487	308696	482445	391986	3.11545e+06	2.72803e+06	2.06884e+06	-	-	-	-
Labn002716	UPLC-MS/MS	373.08	169.02	-	-	374.085	C15H18O11	[M-H]-	galloyl acetyl glucoside	没食子酰乙酰葡萄糖苷	Phenolic acids	酚酸类	Phenolic acids	酚酸类	-	2	-	-	-	727496	908197	1.1998e+06	479161	657883	677513	183306	181072	213090	569582	565022	518471	-	-	-	-
Wchn003509	UPLC-MS/MS	359.1	239.06	-	-	360.106	C15H20O10	[M-H]-	Syringoyl-D-Glucose	丁香酰基-D-葡萄糖	Phenolic acids	酚酸类	Phenolic acids	酚酸类	-	2	-	-	-	191936	231480	310160	1.53167e+06	1.53934e+06	1.47844e+06	771204	814525	959612	997085	996970	790588	-	-	-	-
Lmtn000940	UPLC-MS/MS	345.08	139.04	-	-	346.09	C14H18O10	[M-H]-	1-O-(3,4-Dihydroxy-5-methoxy-benzoyl)-glucoside	1-O-(3,4-二羟基-5-甲氧基-苯甲酰)-葡萄糖苷	Phenolic acids	酚酸类	Phenolic acids	酚酸类	-	2	-	-	-	55277.6	116374	90125.7	215492	123199	318041	165348	168057	186935	137001	149062	183142	-	-	-	-
WaYn002313	UPLC-MS/MS	373.11	193.05	-	-	374.121	C16H22O10	[M-H]-	Homosyringic Acid 4'-O-Glucoside	高丁香酸 4'-O-葡萄糖苷	Phenolic acids	酚酸类	Phenolic acids	酚酸类	-	2	-	-	-	1.49227e+06	1.70625e+06	2.13773e+06	508436	505674	603783	266250	238935	267534	801034	625059	806421	-	-	-	-
Wafn003070	UPLC-MS/MS	371.1	209.05	-	-	372.106	C16H20O10	[M-H]-	Hydroxyferulic acid glucoside	羟基阿魏酸 葡萄糖苷	Phenolic acids	酚酸类	Phenolic acids	酚酸类	-	2	-	-	-	1.16144e+06	1.27001e+06	1.33635e+06	2.41584e+06	2.4837e+06	2.70683e+06	644737	941411	602821	1.52709e+06	1.45498e+06	1.61563e+06	-	-	-	-
Zmhn002032	UPLC-MS/MS	609.18	447.13	-	-	610.19	C28H34O15	[M-H]-	4-O-(6'-O-Glucosylcaffeoylglucosyl)-4-hydroxybenzyl alcohol	4-O-(6'-O-葡萄糖基咖啡酰葡萄糖基)-4-羟基苄醇	Phenolic acids	酚酸类	Phenolic acids	酚酸类	-	2	-	-	-	54016	54016	54016	270080	459286	392838	1.52328e+06	1.99842e+06	2.1007e+06	773314	359358	801130	-	-	-	-
Zbfn004301	UPLC-MS/MS	475.12	161.02	-	-	476.132	C23H24O11	[M-H]-	2-O-(4-carboxylic acid phenethyl)-6-O-caffeoyl glucoside	2-O-(4-羧酸苯乙基)-6-O-咖啡酰葡萄糖苷	Phenolic acids	酚酸类	Phenolic acids	酚酸类	-	2	-	-	-	414834	531044	270696	3.171e+06	3.10897e+06	4.56781e+06	2.30371e+06	2.01802e+06	1.91259e+06	2.39016e+06	2.41204e+06	1.95821e+06	-	-	-	-
Zbln003341	UPLC-MS/MS	345.12	191.06	-	-	346.129	C15H22O9	[M-H]-	2-(2-(3,4-dihydroxyphenyl)-2-methoxyethoxy)-6-(hydroxymethyl)tetrahydro-2H-pyran-3,4,5-tri	β-甲氧基-(3,4-二羟基苯乙醇基)-葡萄糖苷	Phenolic acids	酚酸类	Phenolic acids	酚酸类	-	2	-	-	-	131932	131932	131932	131932	131932	131932	2.00315e+06	2.02692e+06	1.88373e+06	930329	713342	659660	-	-	-	-
Labn003432	UPLC-MS/MS	463.14	121.03	-	-	464.153	C19H28O13	[M-H]-	Glucosyl tachioside	葡萄糖基-它乔糖苷	Phenolic acids	酚酸类	Phenolic acids	酚酸类	-	2	-	-	-	224702	295132	220843	111002	104226	120826	38423.9	27651.8	38585.5	63712.6	97413.1	76242.7	-	-	-	-
Hmgn002038	UPLC-MS/MS	637.18	475.14	-	-	638.185	C29H34O16	[M-H]-	β-Oxoacteoside	β-氧化毛蕊花糖苷	Phenolic acids	酚酸类	Phenolic acids	酚酸类	-	2	-	-	-	455691	670279	843016	1.98463e+06	2.1354e+06	1.69702e+06	3.06887e+06	3.35026e+06	3.29396e+06	3.18704e+06	2.97491e+06	2.09764e+06	-	-	-	-
Zbln003174	UPLC-MS/MS	665.21	191.06	-	-	666.216	C31H38O16	[M-H]-	4''-O-Acetylverbascoside	4''-O-乙酰基巴豆苷	Phenolic acids	酚酸类	Phenolic acids	酚酸类	-	2	-	-	-	13709.6	18421.9	21325.8	81418.7	117280	129791	4.28256e+06	4.89083e+06	4.16013e+06	1.61989e+06	1.73218e+06	1.21258e+06	-	-	-	-
Cmbn007148	UPLC-MS/MS	429.12	429.12	-	-	430.126	C22H22O9	[M-H]-	1-O-Feruloyl-3-O-caffeoylglycerol	1-O-阿魏酰基-3-O-咖啡酰甘油	Phenolic acids	酚酸类	Phenolic acids	酚酸类	-	2	-	-	-	5.81619e+06	6.15876e+06	5.28639e+06	2.89403e+06	3.58484e+06	3.35442e+06	182802	159059	193597	2.90736e+06	2.47438e+06	2.38899e+06	-	-	-	-
Zmhn002782	UPLC-MS/MS	771.22	447.13	-	-	772.221	C37H40O18	[M-H]-	4-O-(6'-O-Glucosylcaffeoylglucosylcaffeoyl)-4-hydroxybenzyl alcohol	4-O-(6'-O-葡萄糖基咖啡酰葡萄糖基咖啡酰)-4-羟基苄醇	Phenolic acids	酚酸类	Phenolic acids	酚酸类	-	2	-	-	-	4446.67	4446.67	4446.67	24570	22233.4	30423	1.4385e+06	1.27009e+06	1.32527e+06	437405	404599	418690	-	-	-	-
Zbfn006396	UPLC-MS/MS	591.17	193.05	-	-	592.179	C28H32O14	[M-H]-	2-(Phenethoxy)-6-feruloyl-O-glucosyl-D-Xylono-1,5-Lactone	2-(苯乙氧基)-6-阿魏酰-O-葡萄糖基-木糖-1,4-内酯	Phenolic acids	酚酸类	Phenolic acids	酚酸类	-	2	-	-	-	94236.4	86433	83731	559574	653787	656752	9.3339e+06	1.03297e+07	9.3644e+06	4.28957e+06	5.33005e+06	4.55552e+06	-	-	-	-
Jmwn004308	UPLC-MS/MS	637.21	475.16	-	-	638.221	C30H38O15	[M-H]-	4-Dihydroxyphenethoxy-8-O-[6-O-(4-O-glucosyl)feruloyl]glucoside	4-二羟苯乙氧基-8-O-[6-O-(4-O-葡萄糖基)阿魏酰基]葡萄糖苷	Phenolic acids	酚酸类	Phenolic acids	酚酸类	-	2	-	-	-	631320	717239	944988	1.94195e+06	2.28149e+06	1.87197e+06	2.80948e+06	2.90806e+06	2.52018e+06	3.24899e+06	3.16577e+06	1.90109e+06	-	-	-	-
Zbfn004514	UPLC-MS/MS	655.19	145.03	-	-	656.195	C29H36O17	[M-H]-	1,3-Diacetyl-3'-p-coumaroyl-2-butanediyl sucrose	1,3-二乙酰基-3'-对香豆酰基-2-丁二酰蔗糖	Phenolic acids	酚酸类	Phenolic acids	酚酸类	-	2	-	-	-	10208.6	10208.6	10208.6	112470	83888.4	101132	166510	60832.8	76345.9	51042.9	60075	62925.9	-	-	-	-
Zbfn004680	UPLC-MS/MS	625.17	463.12	-	-	626.185	C28H34O16	[M-H]-	2-(3,4-Dihydroxyphenethoxy)-6-(3,4,5-trihydroxycaffeoyl)-O-arabinopyranosyl-D-glucose	2-(3,4-二羟基苯乙氧基)-6-(3,4,5-三羟基咖啡酰)-O-阿拉伯糖基-D-葡萄糖	Phenolic acids	酚酸类	Phenolic acids	酚酸类	-	2	-	-	-	1.18688e+06	1.37047e+06	1.58679e+06	1.61252e+06	1.94928e+06	1.85034e+06	1.48236e+06	1.28291e+06	1.04462e+06	1.86191e+06	1.26289e+06	1.51663e+06	-	-	-	-
Wmzn000622	UPLC-MS/MS	533.28	473.26	-	-	534.283	C29H42O9	[M-H]-	Ajubractin A	Ajubractin A	Terpenoids	萜类	Ditepenoids	二萜	-	2	-	-	-	5.64517e+06	6.03856e+06	5.29368e+06	416267	511188	504870	414774	404165	446725	2.71864e+06	2.72676e+06	2.4221e+06	-	-	-	-
Sakn003347	UPLC-MS/MS	609.2	447.15	-	-	610.211	C25H38O17	[M-H]-	3,4-Dihydroxyphenylethanol-8-O-(β-D-apinosyl(1→3)-D-glucosyl(1→6)]-β-D-glucoside	3,4-二羟基苯乙醇-8-O-(β-D-芹糖基(1→3)-D-葡糖基(1→6)]-β-D-葡糖苷	Phenolic acids	酚酸类	Phenolic acids	酚酸类	-	2	-	-	-	156260	224885	267661	380805	459968	587575	1.02065e+06	1.03335e+06	1.07707e+06	568999	530666	704932	-	-	-	-
Cmjn004337	UPLC-MS/MS	401.14	269.1	-	-	402.153	C18H26O10	[M-H]-	Benzyl-(2''-O-xylosyl)glucoside	苄基-(2''-O-木糖基)葡萄糖苷	Phenolic acids	酚酸类	Phenolic acids	酚酸类	-	2	-	-	-	5.93524e+06	5.85738e+06	5.72479e+06	1.41475e+06	1.13912e+06	2.52204e+06	371460	349979	388745	1.2834e+06	1.55687e+06	1.28555e+06	-	-	-	-
pmn001690	UPLC-MS/MS	327.14	165.09	-	-	328.152	C16H24O7	[M-H]-	3-Hydroxy-4-isopropylbenzylalcohol-3-O-glucoside	3-羟基-4-异丙基苯甲醇-3-O-葡萄糖苷	Phenolic acids	酚酸类	Phenolic acids	酚酸类	-	2	-	-	-	1.09255e+06	1.23986e+06	1.90189e+06	6.12802e+07	7.03244e+07	8.26078e+07	5.13812e+07	5.5394e+07	5.85372e+07	4.66651e+07	4.27138e+07	4.32612e+07	-	-	-	-
Lmsn004534	UPLC-MS/MS	613.12	169.01	-	-	614.127	C29H26O15	[M-H]-	1,2-Di-O-galloyl-6-O-Cinnamoyl-β-D-glucose	1,2-二-O-没食子酰-6-O-肉桂酰-β-D-葡萄糖	Phenolic acids	酚酸类	Phenolic acids	酚酸类	-	3	-	-	-	4194.39	4194.39	4194.39	79278.3	79286.2	96772.3	23304	23318.3	22567.9	20972	39637.6	43194.5	-	-	-	-
Lmsn004384	UPLC-MS/MS	629.11	169.01	-	-	630.122	C29H26O16	[M-H]-	1,4-Di-O-galloyl-2-O-p-coumaroyl-β-D-glucose	1,4-二-O-没食子酰-2-O-对香豆酰-β-D-葡萄糖	Phenolic acids	酚酸类	Phenolic acids	酚酸类	-	3	-	-	-	1398.9	1398.9	1398.9	6994.48	15334.2	17470.5	54727.5	48891.5	77919.1	30275.6	40745.8	36098.5	-	-	-	-
Lmsn004322	UPLC-MS/MS	503.12	179.03	-	-	504.127	C24H24O12	[M-H]-	1,6-Di-O-caffeoyl-β-D-glucose*	1,6-二-O-咖啡酰-β-D-葡萄糖*	Phenolic acids	酚酸类	Phenolic acids	酚酸类	-	3	-	-	-	271240	285952	247237	246327	240119	276105	210078	180923	257482	228008	303985	231401	-	-	-	-
Lmsn003409	UPLC-MS/MS	477.1	169.01	-	-	478.111	C22H22O12	[M-H]-	1-O-Galloyl-6-O-p-Coumaroyl-β-D-glucose	1-O-没食子酰-6-O-对香豆酰-β-D-葡萄糖	Phenolic acids	酚酸类	Phenolic acids	酚酸类	-	3	-	-	-	61015.6	74902.1	69069	2025.78	2025.78	12004	2025.78	2025.78	10128.9	68188.9	70472.8	47965.4	-	-	-	-
pmb3068	UPLC-MS/MS	337.09	163.04	-	-	338.1	C16H18O8	[M-H]-	1-O-p-Coumaroylquinic acid	1-O-对香豆酰奎宁酸	Phenolic acids	酚酸类	Phenolic acids	酚酸类	-	3	-	-	-	95959	41224.8	106831	168539	523418	155540	1.27257e+06	1.55811e+06	1.61294e+06	778068	654630	663739	-	-	-	-
Jmwn002117	UPLC-MS/MS	331.1	153.02	-	-	332.111	C14H20O9	[M-H]-	2-(3,4-dihydroxyphenyl)ethanediol 1-O-β-D-glucopyranoside*	2-(3,4-二羟苯基)乙二醇-1-O-β-D-吡喃葡萄糖苷*	Phenolic acids	酚酸类	Phenolic acids	酚酸类	-	3	-	-	-	479165	628388	762937	2.35548e+06	2.65079e+06	3.04384e+06	629325	837249	693832	1.42274e+06	1.32413e+06	1.17815e+06	-	-	-	-
Lmtn003441	UPLC-MS/MS	311.11	149.06	-	-	312.121	C15H20O7	[M-H]-	2-Acetyl-3-hydroxyphenyl-1-O-glucoside	2-乙酰基-3-羟基苯基-1-O-葡萄糖苷	Phenolic acids	酚酸类	Phenolic acids	酚酸类	-	3	-	-	-	32775	32775	32775	171075	163875	184749	822802	701209	716086	351349	366086	312814	-	-	-	-
Hmsn002948	UPLC-MS/MS	417.14	109.03	-	-	418.147	C18H26O11	[M-H]-	2-Hydroxyphenol-1-O-glucosyl(6→1)rhamnoside	2-间苯二酚-1-O-葡萄糖基(6→1)鼠李糖苷	Phenolic acids	酚酸类	Phenolic acids	酚酸类	-	3	-	-	-	116964	137545	116964	188905	205169	202351	408494	360099	329320	270837	214398	187883	-	-	-	-
pmn001529	UPLC-MS/MS	629.08	169.01	-	-	630.086	C28H22O17	[M-H]-	3,4,5-Tri-O-Galloylshikimic acid	3,4,5-三没食子酰莽草酸	Phenolic acids	酚酸类	Phenolic acids	酚酸类	-	3	-	-	-	2189.54	2189.54	2189.54	11881.4	10947.7	25617.3	82664	87298	95365.1	73342.5	51853.6	47742.5	-	-	-	-
Lmsn004970	UPLC-MS/MS	503.12	179.04	-	-	504.127	C24H24O12	[M-H]-	3,6-Di-O-caffeoyl glucose*	3,6-二-O-咖啡酰葡萄糖*	Phenolic acids	酚酸类	Phenolic acids	酚酸类	-	3	-	-	-	155533	136513	137565	360214	314604	411736	115185	80034.7	208114	151453	161379	166078	-	-	-	-
Lmsn001900	UPLC-MS/MS	633.07	301	-	-	634.081	C27H22O18	[M-H]-	3-O-Galloyl-4,6-(S)-HHDP-β-D-glucose	3-O-没食子酰-4,6-(S)-六羟基二苯甲酰基-β-D-葡萄糖	Phenolic acids	酚酸类	Phenolic acids	酚酸类	-	3	-	-	-	1430.2	1430.2	1430.2	17866.2	7150.99	7588.17	1430.2	1430.2	1430.2	48969.3	31040.8	25216	-	-	-	-
pmb3075	UPLC-MS/MS	319.08	145.03	-	-	320.09	C16H16O7	[M-H]-	3-O-p-Coumaroylshikimic acid	3-O-对香豆酰莽草酸	Phenolic acids	酚酸类	Phenolic acids	酚酸类	-	3	-	-	-	4130.06	4130.06	4130.06	4130.06	4130.06	4130.06	51606.9	45875.8	58430.8	28680	20650.3	27530.3	-	-	-	-
pmb3072	UPLC-MS/MS	481.14	319.3	-	-	482.142	C22H26O12	[M-H]-	3-O-p-Coumaroylshikimic acid-O-glucoside	3-O-对香豆酰莽草酸-O-葡萄糖苷	Phenolic acids	酚酸类	Phenolic acids	酚酸类	-	3	-	-	-	110035	124985	104678	220725	211035	194846	613710	522275	589036	253025	383301	328391	-	-	-	-
Zmhn003106	UPLC-MS/MS	461.15	337.09	-	-	462.153	C23H26O10	[M-H]-	4-O-(6'-O-Glucosylferuloyl)-4-hydroxybenzyl alcohol	4-O-(6'-O-葡萄糖基-亚氨基)-4-羟基苄醇	Phenolic acids	酚酸类	Phenolic acids	酚酸类	-	3	-	-	-	11298.8	11298.8	11298.8	11298.8	11298.8	11298.8	148689	176354	153988	56494	76916.4	117946	-	-	-	-
Zmhn002909	UPLC-MS/MS	445.11	323.08	-	-	446.121	C22H22O10	[M-H]-	6-O-Glucosyl-caffeoylbenzoic acid	6-O-葡萄糖基-咖啡酰苯甲酸	Phenolic acids	酚酸类	Phenolic acids	酚酸类	-	3	-	-	-	7024.35	1404.87	1404.87	1404.87	1404.87	1404.87	106567	122503	133803	82073.4	86679.6	75977.5	-	-	-	-
Cmsn000894	UPLC-MS/MS	361.08	211.03	-	-	362.085	C14H18O11	[M-H]-	7-O-Galloyl-D-sedoheptulose	7-O-没食子酰-D-景天庚酮糖	Phenolic acids	酚酸类	Phenolic acids	酚酸类	-	3	-	-	-	33996	50274.6	48149	33287.7	31506.9	30315	6062.99	6062.99	6062.99	54031.4	38244.9	44570.9	-	-	-	-
pmb2654	UPLC-MS/MS	460.15	117.9	-	-	461.153	C19H27NO12	[M-H]-	Anthranilate-1-O-Sophoroside	邻氨基苯甲酸-1-O-槐糖苷	Phenolic acids	酚酸类	Phenolic acids	酚酸类	-	3	-	-	-	1.75684e+06	1.51133e+06	1.60215e+06	328068	123239	140156	1.3707e+06	1.10552e+06	1.14632e+06	271904	247127	369243	-	-	-	-
Lmhn002574	UPLC-MS/MS	431.06	137.03	-	-	432.069	C20H16O11	[M-H]-	Caffeoyl(p-Hydroxybenzoyl)tartaric acid	咖啡酰对羟基苯甲酰酒石酸	Phenolic acids	酚酸类	Phenolic acids	酚酸类	-	3	-	-	-	97754.2	488771	97754.2	2.54228e+06	2.41413e+06	2.67263e+06	5.03103e+06	4.9532e+06	4.80233e+06	3.50989e+06	3.05905e+06	3.01746e+06	-	-	-	-
mad2085	UPLC-MS/MS	457.08	295.04	-	-	458.085	C22H18O11	[M-H]-	Caffeoyl-p-coumaroyltartaric acid	咖啡酰对香豆酰酒石酸	Phenolic acids	酚酸类	Phenolic acids	酚酸类	-	3	-	-	-	19080.5	19080.5	19080.5	19080.5	19080.5	19080.5	361805	303640	279210	115378	145425	95402.6	-	-	-	-
Lmhn004756	UPLC-MS/MS	455.1	233.04	-	-	456.106	C23H20O10	[M-H]-	Cinnamoylferuloyltartaric acid	肉桂酰阿魏酰酒石酸	Phenolic acids	酚酸类	Phenolic acids	酚酸类	-	3	-	-	-	150388	167434	151891	92759	132768	120045	158168	148320	153544	134838	123003	87226.9	-	-	-	-
Lmmn000774	UPLC-MS/MS	343.1	181.05	-	-	344.111	C15H20O9	[M-H]-	Dihydrocaffeoylglucose*	二氢咖啡酰葡萄糖*	Phenolic acids	酚酸类	Phenolic acids	酚酸类	-	2	-	-	-	178162	40787.4	8157.48	402539	384289	587158	2.93489e+06	3.82591e+06	2.40473e+06	3.60775e+06	3.11978e+06	4.03652e+06	-	-	-	-
Lmhn003074	UPLC-MS/MS	309.06	193.05	-	-	310.069	C14H14O8	[M-H]-	Feruloylmalic acid	阿魏酰苹果酸	Phenolic acids	酚酸类	Phenolic acids	酚酸类	-	3	-	-	-	677284	871556	726905	1.05154e+06	1.29807e+06	1.05513e+06	1.86459e+06	1.3309e+06	1.52515e+06	1.19891e+06	1.14572e+06	1.09725e+06	-	-	-	-
pmb3056	UPLC-MS/MS	355.1	121.03	-	-	356.111	C16H20O9	[M-H]-	Homovanilloylquinic acid	高香草酰奎宁酸	Phenolic acids	酚酸类	Phenolic acids	酚酸类	-	3	-	-	-	81764.7	81764.7	81764.7	81764.7	81764.7	81764.7	1.44893e+06	1.16374e+06	1.46683e+06	408823	417892	518670	-	-	-	-
Lmyn002435	UPLC-MS/MS	415.16	253.07	-	-	416.168	C19H28O10	[M-H]-	Hydrangeifolin I	苄基芸香糖苷	Phenolic acids	酚酸类	Phenolic acids	酚酸类	-	3	-	-	-	220196	158765	126342	79795.6	47862.2	93032.6	61871.5	115440	88632.3	110880	134355	94532	-	-	-	-
Hmcn001989	UPLC-MS/MS	755.25	593.21	-	-	756.248	C34H44O19	[M-H]-	Lavandulifolioside	薰衣草叶苷	Phenolic acids	酚酸类	Phenolic acids	酚酸类	-	3	-	-	-	22181.6	52431.2	19318	68728.6	60696.8	101037	148259	167910	62787.4	115716	81687.3	64197.8	-	-	-	-
Wmbn000555	UPLC-MS/MS	561.31	501.28	-	-	562.314	C31H46O9	[M-H]-	Ajugalide E	Ajugalide E	Terpenoids	萜类	Ditepenoids	二萜	866016-98-0	2	-	-	-	87046.9	87046.9	87046.9	497240	611282	469841	1.08e+06	1.12259e+06	931881	506098	575612	435234	-	-	-	-
Wmzn000626	UPLC-MS/MS	549.27	489.249	-	-	550.278	C29H42O10	[M-H]-	14,15-dehydroajugareptansin*	14,15-dehydroajugareptansin*	Terpenoids	萜类	Ditepenoids	二萜	-	3	-	-	-	7.83286e+07	8.66804e+07	6.99232e+07	2164532	4.40143e+06	4.91811e+06	862525	870935	887801	2.04268e+07	2.05613e+07	1.94184e+07	-	-	-	-
Lmhn002683	UPLC-MS/MS	457.08	163.04	-	-	458.085	C22H18O11	[M-H]-	p-Coumaroylcaffeoyltartaric acid	对香豆酰咖啡酰酒石酸	Phenolic acids	酚酸类	Phenolic acids	酚酸类	-	3	-	-	-	6128.76	6128.76	30643.8	155458	33806.8	145461	1.1262e+06	1.20383e+06	1.38234e+06	524410	560829	625035	-	-	-	-
Hmcn004128	UPLC-MS/MS	339.11	159.04	-	-	340.116	C16H20O8	[M-H]-	P-Methoyxcinnamate glucoside	对甲氧基桂皮酸葡萄糖苷	Phenolic acids	酚酸类	Phenolic acids	酚酸类	-	3	-	-	-	123482	173560	145730	2.06883e+07	2.09913e+07	2.5179e+07	8.94557e+06	6.96885e+06	6.91034e+06	1.07449e+07	9.7093e+06	6.52057e+06	-	-	-	-
pmb3317	UPLC-MS/MS	371.1	179.1	-	-	372.106	C16H20O10	[M-H]-	Quinacyl syringic acid	奎宁酰丁香酸	Phenolic acids	酚酸类	Phenolic acids	酚酸类	-	3	-	-	-	40618.1	40618.1	40618.1	40618.1	40618.1	40618.1	639170	804260	825897	203090	246553	209998	-	-	-	-
Wmzn000617	UPLC-MS/MS	549.27	489.25	-	-	550.278	C29H42O10	[M-H]-	3β-hydroxyajugavensin*	3β-hydroxyajugavensin*	Terpenoids	萜类	Ditepenoids	二萜	-	3	-	-	-	8.28861e+07	8.87405e+07	7.84694e+07	4.69642e+06	5.15345e+06	6.0356e+06	1.37092e+06	1.5487e+06	1.43702e+06	1.98245e+07	2.30106e+07	1.98338e+07	-	-	-	-
Lmhn003246	UPLC-MS/MS	517.1	223.06	-	-	518.106	C24H22O13	[M-H]-	Sinapoylcaffeoyltartaric acid	芥子酰咖啡酰酒石酸	Phenolic acids	酚酸类	Phenolic acids	酚酸类	-	3	-	-	-	3542.04	31160.9	3542.04	3542.04	3542.04	3542.04	3542.04	3542.04	3542.04	17710.2	40797.7	37786.7	-	-	-	-
Lmhn002321	UPLC-MS/MS	461.07	167.04	-	-	462.08	C21H18O12	[M-H]-	Vnilloylcaffeoyltartaric acid	香草酰咖啡酰酒石酸	Phenolic acids	酚酸类	Phenolic acids	酚酸类	-	3	-	-	-	51539.8	51539.8	51539.8	51539.8	51539.8	51539.8	397241	390969	257699	338924	354626	322662	-	-	-	-
Lmhn001386	UPLC-MS/MS	299.04	167.03	-	-	300.048	C12H12O9	[M-H]-	Vnilloyltartaric acid	香草酰酒石酸	Phenolic acids	酚酸类	Phenolic acids	酚酸类	-	3	-	-	-	523742	599697	757251	525859	749072	728233	232361	223885	269595	1.32059e+06	1.14255e+06	1.40554e+06	-	-	-	-
Lmgn001670	UPLC-MS/MS	137.03	108.02	-	-	138.032	C7H6O3	[M-H]-	Salicylic acid	水杨酸	Phenolic acids	酚酸类	Phenolic acids	酚酸类	69-72-7	2	-	-	-	1.14285e+06	1.32339e+06	1.25727e+06	1.69786e+06	1.92232e+06	1.84864e+06	4.46296e+06	4.06995e+06	4.19873e+06	2.32135e+06	2.6137e+06	2.18987e+06	C00805	ko00996,ko01100,ko01110,ko04075	C00805	-
Zmhn002422	UPLC-MS/MS	355.1	193.05	-	-	356.111	C16H20O9	[M-H]-	1-O-Feruloyl-β-D-glucose	1-O-阿魏酰-β-D-葡萄糖	Phenolic acids	酚酸类	Phenolic acids	酚酸类	7196-71-6	2	-	-	-	99936.8	229641	153681	1.79409e+06	2.29994e+06	2.79407e+06	3.8811e+07	3.06776e+07	3.27182e+07	1.88879e+07	1.66278e+07	1.8518e+07	C17759	-	C17759	-
mws0028	UPLC-MS/MS	167.03	108.02	-	-	168.042	C8H8O4	[M-H]-	Vanillic acid	香草酸	Phenolic acids	酚酸类	Phenolic acids	酚酸类	121-34-6	2	-	-	-	1.01375e+06	1.26038e+06	1.04345e+06	3.95509e+06	4.25329e+06	3.58673e+06	939916	1.86754e+06	885430	1.69404e+06	1.81706e+06	1.40366e+06	C06672	-	C06672	-
Ymjm000154	UPLC-MS/MS	285.1	123.05	-	-	286.105	C13H18O7	[M-H]-	Salicin	水杨苷	Phenolic acids	酚酸类	Phenolic acids	酚酸类	138-52-3	2	-	-	-	7756.94	7756.94	7756.94	38784.7	102818	109445	3.79978e+06	4.0988e+06	4.18443e+06	2.24931e+06	2.08234e+06	2.3198e+06	C01451	ko00010	C01451	-
mws4085	UPLC-MS/MS	223.06	193.02	-	-	224.069	C11H12O5	[M-H]-	Sinapic acid	芥子酸	Phenolic acids	酚酸类	Phenolic acids	酚酸类	530-59-6	2	-	-	-	78369.4	73951.9	111769	89709.6	148536	54986	114623	128657	117622	124700	128638	100585	C00482	ko00940,ko01100,ko01110	C00482	-
Zmhn002227	UPLC-MS/MS	385.11	223.06	-	-	386.121	C17H22O10	[M-H]-	4-O-Glucosyl-sinapate	4-O-葡萄糖基芥子酸	Phenolic acids	酚酸类	Phenolic acids	酚酸类	-	2	-	-	-	428243	421362	589714	443489	337785	503396	1.47533e+06	1.73102e+06	1.86525e+06	1.88677e+06	1.20105e+06	1.40409e+06	C02919	-	C02919	-
mws0180	UPLC-MS/MS	153.02	109.03	-	-	154.027	C7H6O4	[M-H]-	2,5-Dihydroxybenzoic acid; Gentisic Acid*	2,5-二羟基苯甲酸; 龙胆酸*	Phenolic acids	酚酸类	Phenolic acids	酚酸类	490-79-9	1	-	-	-	359124	440060	350585	800099	681593	939231	1.03733e+06	918171	922823	663343	636061	594061	C00628	ko00350,ko01100	C00628	-
Lmsn002548	UPLC-MS/MS	341.09	161.02	-	-	342.095	C15H18O9	[M-H]-	1-O-Caffeoyl-β-D-glucose	1-O-咖啡酰-β-D-葡萄糖	Phenolic acids	酚酸类	Phenolic acids	酚酸类	14364-08-0	2	-	-	-	2.64705e+06	3.71489e+06	1.59494e+06	5.15305e+06	6.53265e+06	5.05506e+06	1.58437e+07	1.67054e+07	1.65516e+07	1.12579e+07	9.20577e+06	1.04444e+07	C10433	-	C10433	-
Lmtn002565	UPLC-MS/MS	329.11	167.03	-	-	330.095	C14H18O9	[M-H]-	1-O-Vanilloyl-D-Glucose	1-O-香草酰-D-葡萄糖	Phenolic acids	酚酸类	Phenolic acids	酚酸类	-	3	-	-	-	13505.8	13505.8	69290.9	1.55819e+06	67529.2	112295	3.00092e+06	2.73503e+06	2.85784e+06	1.59042e+06	1.39265e+06	905555	C20470	-	C20470	-
Wafn002807	UPLC-MS/MS	519.11	165.02	-	-	520.122	C24H24O13	[M-H]-	methyl 4-O-galloylchlorogenate	4-O-没食子酰绿原酸甲酯	Phenolic acids	酚酸类	Phenolic acids	酚酸类	574747-58-3	2	-	-	-	42150.8	63691.1	87810.5	57754.1	54899.1	56542	197976	241772	329628	211431	263271	205532	-	-	-	-
mws0027	UPLC-MS/MS	197.05	123.01	-	-	198.053	C9H10O5	[M-H]-	Syringic acid	丁香酸	Phenolic acids	酚酸类	Phenolic acids	酚酸类	530-57-4	2	-	-	-	444142	596259	474121	1.22137e+06	1.16568e+06	1.17452e+06	89808.7	103113	70960.2	555014	591841	364824	C10833	-	C10833	-
Hmgn001278	UPLC-MS/MS	461.17	315.1	-	-	462.174	C20H30O12	[M-H]-	Verbasoside	脱咖啡酰基毛蕊糖苷	Phenolic acids	酚酸类	Phenolic acids	酚酸类	61548-34-3	2	-	-	-	1.09548e+07	1.18605e+07	1.40128e+07	2.82006e+07	2.74927e+07	3.30312e+07	1.21257e+07	1.27449e+07	1.32531e+07	1.72746e+07	1.75607e+07	1.36215e+07	-	-	-	-
Lmtn002324	UPLC-MS/MS	431.15	269.1	-	-	432.163	C19H28O11	[M-H]-	Benzyl-(2''-O-glucosyl)glucoside*	苄基-(2''-O-葡萄糖基)葡萄糖苷*	Phenolic acids	酚酸类	Phenolic acids	酚酸类	-	3	-	-	-	753786	817029	812560	2.4212e+06	2.51225e+06	2.77412e+06	2.39337e+06	2.51354e+06	2.45964e+06	1.54601e+06	1.92239e+06	1.70044e+06	C17564	-	C17564	-
pmb3074	UPLC-MS/MS	337.09	191.06	-	-	338.1	C16H18O8	[M-H]-	5-O-p-Coumaroylquinic acid*	5-O-对香豆酰奎宁酸*	Phenolic acids	酚酸类	Phenolic acids	酚酸类	1899-30-5	2	-	-	-	132141	123257	146574	435262	550282	504104	1.07047e+08	9.11817e+07	1.06482e+08	8.40905e+07	8.74046e+07	8.36357e+07	C12208	ko00940,ko00941,ko00945,ko01110	C12208	-
Wmzn000624	UPLC-MS/MS	549.27	489.25	-	-	550.278	C29H42O10	[M-H]-	Ajugapitin*	Ajugapitin*	Terpenoids	萜类	Ditepenoids	二萜	-	3	-	-	-	8.01182e+07	9.08981e+07	7.4787e+07	4.36662e+06	5.00305e+06	5.95618e+06	1.55077e+06	1.74863e+06	1.5177e+06	1.85935e+07	2.39448e+07	2.03877e+07	-	-	-	-
Qmxp082605	UPLC-MS/MS	361.16	137.06	-	-	360.157	C20H24O6	[M+H]+	Sculponeatin A	Sculponeatin A	Terpenoids	萜类	Ditepenoids	二萜	85287-60-1	3	-	-	-	105529	123710	183258	87405	63589.1	94904.4	8144.49	8144.49	8144.49	40722.5	47973.2	61159.8	-	-	-	-
Sakn004193	UPLC-MS/MS	639.2	607.17	-	-	640.2	C29H36O16	[M-H]-	Lugrandoside	黄大花洋地黄苷	Phenolic acids	酚酸类	Phenolic acids	酚酸类	117457-37-1	2	-	-	-	7647.56	7647.56	38237.8	804889	707464	1.00405e+06	2284338	2.62022e+06	3.2515e+06	1.1219e+06	1.31213e+06	1.0889e+06	-	-	-	-
Lmtn002233	UPLC-MS/MS	327.11	165.05	-	-	328.116	C15H20O8	[M-H]-	Androsin	草夹竹桃苷	Phenolic acids	酚酸类	Phenolic acids	酚酸类	531-28-2	2	-	-	-	1.0211e+06	1.43112e+06	1.67519e+06	6.0403e+07	6.69506e+07	7.8677e+07	5.22229e+07	5.89013e+07	5.14476e+07	4.08914e+07	49757236	3.64621e+07	-	-	-	-
Zmhn002334	UPLC-MS/MS	355.1	193.05	-	-	356.111	C16H20O9	[M-H]-	6-O-Feruloyl-β-D-glucose	6-O-阿魏酰-D-葡萄糖	Phenolic acids	酚酸类	Phenolic acids	酚酸类	137887-25-3	2	-	-	-	2.53609e+06	3.68004e+06	4.20307e+06	1.27452e+07	1.22048e+07	1.49534e+07	3.81861e+07	3.55379e+07	4.80177e+07	2.05217e+07	2.0554e+07	2.50868e+07	-	-	-	-
Zmtn001661	UPLC-MS/MS	315.11	153.02	-	-	316.116	C14H20O8	[M-H]-	Vanilloloside	香草醇苷	Phenolic acids	酚酸类	Phenolic acids	酚酸类	74950-96-2	2	-	-	-	5.49495e+06	6.87951e+06	1.15993e+07	1.71298e+07	2.08154e+07	1.72328e+07	3.42604e+07	8.47384e+07	7.76832e+07	2.29266e+07	2.1793e+07	2.26044e+07	-	-	-	-
Zmhn001420	UPLC-MS/MS	165.02	121.03	-	-	166.027	C8H6O4	[M-H]-	5,7-Dihydroxy-1(3H)-isobenzofuranone*	5,7-二羟基-1(3H)-异苯并呋喃酮*	Phenolic acids	酚酸类	Phenolic acids	酚酸类	27979-58-4	2	-	-	-	178835	184945	222847	2659.25	2659.25	2659.25	70591.3	13296.2	78930.8	107263	125322	177212	-	-	-	-
pmn001468	UPLC-MS/MS	461.13	137.02	-	-	462.137	C19H26O13	[M-H]-	Sibiricose A3	西伯利亚远志糖 A3	Phenolic acids	酚酸类	Phenolic acids	酚酸类	139726-39-9	2	-	-	-	152214	210531	190193	3.08759e+06	2.97327e+06	3.5766e+06	800430	969385	909384	1.05529e+06	1.08067e+06	1.2407e+06	-	-	-	-
WaYn003861	UPLC-MS/MS	327.11	123.04	-	-	328.116	C15H20O8	[M-H]-	Salicin 6'-Acetate	水杨苷 6-乙酸酯	Phenolic acids	酚酸类	Phenolic acids	酚酸类	19764-02-4	2	-	-	-	279210	328118	413302	318613	268483	370530	5.32871e+06	4.54586e+06	3.79741e+06	2.25809e+06	2.05964e+06	1.94171e+06	-	-	-	-
Smcn000644	UPLC-MS/MS	331.1	108.02	-	-	332.111	C14H20O9	[M-H]-	Leonuriside A	益母草苷 A	Phenolic acids	酚酸类	Phenolic acids	酚酸类	121748-12-7	2	-	-	-	42015.4	65917.9	91778.6	265158	300472	339742	572461	816492	835569	341988	381284	405133	-	-	-	-
Ymjm000116	UPLC-MS/MS	313.09	151.04	-	-	314.1	C14H18O8	[M-H]-	6-O-Acetylarbutin	6-O-乙酰熊果苷	Phenolic acids	酚酸类	Phenolic acids	酚酸类	10338-88-2	2	-	-	-	1.96983e+06	2.22587e+06	3.49458e+06	908977	980407	1.17994e+06	4.0675e+06	3.49515e+06	3.36612e+06	2.80817e+06	2.50863e+06	3.40842e+06	-	-	-	-
mws2108	UPLC-MS/MS	353.09	191.06	-	-	354.095	C16H18O9	[M-H]-	Cryptochlorogenic acid (4-O-Caffeoylquinic acid)*	隐绿原酸 (4-O-咖啡酰奎宁酸)*	Phenolic acids	酚酸类	Phenolic acids	酚酸类	905-99-7	1	-	-	-	54002.8	67501.3	71353.9	1.1232e+06	1.26782e+06	1.2442e+06	1.55191e+07	2.0216e+07	2.17843e+07	1.0505e+07	1.11566e+07	1.12217e+07	-	-	-	-
Hmmn002544	UPLC-MS/MS	355.1	193.05	-	-	356.111	C16H20O9	[M-H]-	Ferulic acid-4-O-glucoside	阿魏酸-4-O-葡萄糖苷	Phenolic acids	酚酸类	Phenolic acids	酚酸类	117405-51-3	2	-	-	-	27186	81862.7	65648.8	129750	150105	185263	340583	3.02978e+07	2.35237e+07	220858	162986	258601	-	-	-	-
mws0885	UPLC-MS/MS	153.02	109.03	-	-	154.027	C7H6O4	[M-H]-	2,4-Dihydroxybenzoic acid	2,4-二羟基苯甲酸	Phenolic acids	酚酸类	Phenolic acids	酚酸类	89-86-1	2	-	-	-	246381	930346	42677.1	2.28183e+06	1.87468e+06	1.92607e+06	2.57438e+06	2.51632e+06	1.81327e+06	1.38197e+06	1.39695e+06	1.67722e+06	-	-	-	-
mws1584	UPLC-MS/MS	515.12	191.03	-	-	516.127	C25H24O12	[M-H]-	1,3-O-Dicaffeoylquinic Acid (Cynarin)	1,3-O-双咖啡酰奎宁酸(洋蓟酸)	Phenolic acids	酚酸类	Phenolic acids	酚酸类	30964-13-7	2	-	-	-	154488	178868	149933	774451	706849	867874	8.22091e+06	9.95746e+06	1.18172e+07	2.97077e+06	3.92381e+06	3.77548e+06	C10445	-	C10445	-
mws0179	UPLC-MS/MS	367.1	190.9	-	-	368.111	C17H20O9	[M-H]-	Chlorogenic acid methyl ester	绿原酸甲酯	Phenolic acids	酚酸类	Phenolic acids	酚酸类	29708-87-0	2	-	-	-	101540	96872.7	144480	434135	596346	561336	5.531e+07	6.13488e+07	6.19983e+07	3.45451e+07	3.91768e+07	4.12617e+07	-	-	-	-
Wmmn000117	UPLC-MS/MS	463.11	168.01	-	-	464.117	C18H24O14	[M-H]-	mudanoside B	牡丹苷B	Phenolic acids	酚酸类	Phenolic acids	酚酸类	203511-37-9	2	-	-	-	266994	323324	289823	812141	722985	782335	373416	378416	397513	421930	540203	470478	-	-	-	-
Qmxn081806	UPLC-MS/MS	391.21	331.19	-	-	392.22	C22H32O6	[M-H]-	Nervonin J	Nervonin J	Terpenoids	萜类	Ditepenoids	二萜	-	3	-	-	-	8295.13	8295.13	8295.13	41475.6	49059	46284.6	458672	445045	438724	225763	235843	229919	-	-	-	-
Wchn005577	UPLC-MS/MS	461.11	315.07	-	-	462.116	C22H22O11	[M-H]-	1-O-Galloyl-2-O-Cinnamoyl-β-D-glucose*	1-O-没食子酰-2-O-肉桂酰-β-D-葡萄糖*	Phenolic acids	酚酸类	Phenolic acids	酚酸类	56994-83-3	2	-	-	-	1.41203e+06	1.34383e+06	1.22458e+06	978819	959609	1.07388e+06	222407	198323	165094	720345	730514	749158	-	-	-	-
Hmbn002692	UPLC-MS/MS	517.16	175.04	-	-	518.164	C22H30O14	[M-H]-	6'-O-Feruloyl-D-sucrose	6'-O-阿魏酰-D-蔗糖	Phenolic acids	酚酸类	Phenolic acids	酚酸类	118230-77-6	2	-	-	-	7.48899e+06	5.95203e+06	7.60521e+06	957705	946922	924777	366976	256535	345241	712299	697821	750781	-	-	-	-
Li512115	UPLC-MS/MS	515.12	353.09	-	-	516.127	C25H24O12	[M-H]-	Isochlorogenic acid B	异绿原酸 B	Phenolic acids	酚酸类	Phenolic acids	酚酸类	14534-61-3	2	-	-	-	978747	744067	949027	122351	126658	211854	381384	319627	416374	411138	377428	332852	C10468	-	C10468	-
mws0011	UPLC-MS/MS	371.13	209.08	-	-	372.142	C17H24O9	[M-H]-	Syringin	丁香苷	Phenolic acids	酚酸类	Phenolic acids	酚酸类	118-34-3	2	-	-	-	1.38561e+06	1.50878e+06	1.44461e+06	2.4321e+06	2.73082e+06	3.07977e+06	1.33717e+06	1.38476e+06	1.36097e+06	1.27755e+06	1.63873e+06	1.29687e+06	C01533	ko00940	C01533	-
Lmdn003756	UPLC-MS/MS	193.05	135.05	-	-	194.058	C10H10O4	[M-H]-	Methyl caffeate	咖啡酸甲酯	Phenolic acids	酚酸类	Phenolic acids	酚酸类	3843-74-1	2	-	-	-	1.83275e+07	1.33255e+07	1.13931e+07	1.05489e+07	5.7495e+06	8.85852e+06	9.72081e+06	1.44589e+07	8.49478e+06	1.41814e+07	9.82683e+06	1.45957e+07	C10477	-	C10477	-
mws2212	UPLC-MS/MS	179.03	135.05	-	-	180.042	C9H8O4	[M-H]-	Caffeic acid	咖啡酸	Phenolic acids	酚酸类	Phenolic acids	酚酸类	331-39-5	2	-	-	-	808334	876063	864961	697298	638357	1.6593e+06	2.61948e+06	598348	653260	616701	868158	1.49153e+06	C01197	ko00940,ko01100,ko01110	C01197	-
mws2368	UPLC-MS/MS	137.06	119.05	-	-	138.068	C8H10O2	[M-H]-	Tyrosol; 4-Hydroxyphenylethanol	酪醇; 对羟基苯乙醇	Phenolic acids	酚酸类	Phenolic acids	酚酸类	501-94-0	2	-	-	-	110808	174547	128249	236996	249273	205302	503940	496545	468846	264660	316981	280047	C06044	ko00350,ko01100	C06044	-
Lmcn002982	UPLC-MS/MS	197.05	167	-	-	198.053	C9H10O5	[M-H]-	Methyl 3-O-Methyl Gallate	没食子酸甲酯-3-甲醚	Phenolic acids	酚酸类	Phenolic acids	酚酸类	3934-86-9	2	-	-	-	248913	358853	375427	168977	70956.7	136232	38582.7	27517.7	23998	104934	125472	137960	-	-	-	-
MWS2066	UPLC-MS/MS	143.05	115.06	-	-	144.058	C10H8O	[M-H]-	1-Naphthol*	1-萘酚*	Phenolic acids	酚酸类	Phenolic acids	酚酸类	90-15-3	3	-	-	-	15381.8	18840	13940.5	40536.3	29483.1	37260	9978.68	16845.4	14348.6	13151.3	21552.2	21776.7	C11714	-	C11714	-
Lmsn003111	UPLC-MS/MS	325.09	145.03	-	-	326.1	C15H18O8	[M-H]-	1-O-p-Coumaroyl-β-D-glucose	1-O-对香豆酰-β-D-葡萄糖	Phenolic acids	酚酸类	Phenolic acids	酚酸类	7139-64-2	3	-	-	-	33993.7	50163.2	56730.7	75400.8	160065	98915.8	2.08962e+06	1.7748e+06	1.78096e+06	859616	906798	1.08379e+06	C16827	-	C16827	-
MA10002917	UPLC-MS/MS	183	109.02	-	-	184.012	C6H4N2O5	[M-H]-	2,4-Dinitrophenol	2,4-二硝基苯酚	Phenolic acids	酚酸类	Phenolic acids	酚酸类	51-28-5	3	-	-	-	114962	124806	95912.7	168881	135350	159658	500148	501564	533212	235255	285617	250289	C02496	-	C02496	-
Lmrn003000	UPLC-MS/MS	165.06	103.06	-	-	166.063	C9H10O3	[M-H]-	2-Hydroxy-3-phenylpropanoic acid	2-羟基-3-苯基丙酸	Phenolic acids	酚酸类	Phenolic acids	酚酸类	7326-19-4	3	-	-	-	4534.38	4534.38	4534.38	36251.4	38315.1	22671.9	66075.1	88806.9	76651	45442.5	54579.6	33054	C05607	ko00360,ko00960,ko01100,ko01110	C05607	-
Lmbn001930	UPLC-MS/MS	121.03	77.04	-	-	122.037	C7H6O2	[M-H]-	2-Hydroxybenzaldehyde (Salicylaldehyde)	2-羟基苯甲醛 (水杨醛)	Phenolic acids	酚酸类	Phenolic acids	酚酸类	90-02-8	3	-	-	-	80129.5	97213.1	76908.8	99296.2	61379.7	146902	121944	100016	82258.4	113232	154996	63039	C06202	ko01100	C06202	-
MWSmce247	UPLC-MS/MS	135.05	91.06	-	-	136.052	C8H8O2	[M-H]-	2-Methylbenzoic acid	2-甲基苯甲酸	Phenolic acids	酚酸类	Phenolic acids	酚酸类	118-90-1	3	-	-	-	4892.28	4892.28	4892.28	39621.5	43396.6	26416.2	31781.4	28935.5	32231.3	25161.9	26422.8	24461.4	C07215	ko01100	C07215	-
MWS1875	UPLC-MS/MS	143.05	115.05	-	-	144.058	C10H8O	[M-H]-	2-Naphthol*	2-萘酚*	Phenolic acids	酚酸类	Phenolic acids	酚酸类	135-19-3	3	-	-	-	14586.7	13475.4	17217.1	55272.3	34681.9	37259.8	14549.2	13561.6	12345.4	20887.1	18841.9	16628.4	C11713	-	C11713	-
pme2598	UPLC-MS/MS	167.03	123.05	-	-	168.042	C8H8O4	[M-H]-	3,4-Dihydroxybenzeneacetic acid*	3,4-二羟基苯乙酸*	Phenolic acids	酚酸类	Phenolic acids	酚酸类	102-32-9	3	-	-	-	527635	666903	560693	620806	310059	532887	338671	225884	591353	436079	721972	777409	C01161	ko00350,ko01100	C01161	-
MA10107783	UPLC-MS/MS	207.03	119.05	-	-	208.037	C10H8O5	[M-H]-	3-[(1-Carboxyvinyl)oxy]benzoic acid	3-[(1-羧乙烯基)氧基]苯甲酸	Phenolic acids	酚酸类	Phenolic acids	酚酸类	16929-37-6	3	-	-	-	91015.6	107563	104086	492061	475889	517278	167733	149076	155801	121577	161690	126141	C20772	ko00130,ko01100,ko01110,ko01240	C20772	-
MWSmce248	UPLC-MS/MS	163.04	119.05	-	-	164.047	C9H8O3	[M-H]-	3-Hydroxycinnamic Acid*	3-羟基肉桂酸*	Phenolic acids	酚酸类	Phenolic acids	酚酸类	14755-02-3	3	-	-	-	197652	215634	164108	2.68535e+06	2.6106e+06	2.79434e+06	608137	675958	591879	1.07273e+06	1.26663e+06	1.31221e+06	C12621	ko00360,ko01100	C12621	-
MWS2058	UPLC-MS/MS	151.04	107.05	-	-	152.047	C8H8O3	[M-H]-	3-Methylsalicylic Acid	3-甲基水杨酸	Phenolic acids	酚酸类	Phenolic acids	酚酸类	83-40-9	3	-	-	-	130451	144401	109572	9081	9081	9081	9081	9081	9081	45405	59647	57859.2	C14088	-	C14088	-
MWSmce387	UPLC-MS/MS	183.03	124.02	-	-	184.037	C8H8O5	[M-H]-	3-O-Methylgallic acid	3-O-甲基没食子酸	Phenolic acids	酚酸类	Phenolic acids	酚酸类	3934-84-7	3	-	-	-	53685.1	42181.2	51583.8	50822.5	50570.4	62622	8436.25	8436.25	8436.25	49870.4	48688.1	49173.5	C05616	-	C05616	-
pmb2497	UPLC-MS/MS	197.05	153.06	-	-	198.053	C9H10O5	[M-H]-	4-Hydroxy-3-methoxymandelate	4-羟基-3-甲氧基扁桃酸	Phenolic acids	酚酸类	Phenolic acids	酚酸类	55-10-7	3	-	-	-	23987.7	25743.4	62704.6	156177	35642.8	177011	79443.1	142824	108130	79441.1	48653.7	67115.1	C05584	ko00350,ko01100	C05584	-
pma6460	UPLC-MS/MS	337.09	163.04	-	-	338.1	C16H18O8	[M-H]-	4-O-p-Coumaroylquinic acid	4-O-对香豆酰奎宁酸	Phenolic acids	酚酸类	Phenolic acids	酚酸类	32451-86-8	3	-	-	-	1335.73	1335.73	1335.73	7797.57	11148.9	6678.67	700524	770784	637248	298088	323072	279772	C10441	-	C10441	-
pmn001573	UPLC-MS/MS	461.15	299.09	-	-	462.153	C23H26O10	[M-H]-	Desmethylagrimonolide-6-O-glucoside	去甲基仙鹤草内酯-6-O-葡萄糖苷	Phenolic acids	酚酸类	Phenolic acids	酚酸类	1257408-55-1	2	-	-	-	28658.7	78974.5	99413.9	324545	161800	206505	2.05923e+06	2.46752e+06	2.05057e+06	1.49032e+06	1.42147e+06	1.24433e+06	-	-	-	-
mws0093	UPLC-MS/MS	179.07	146.04	-	-	180.079	C10H12O3	[M-H]-	Coniferyl alcohol	松柏醇	Phenolic acids	酚酸类	Phenolic acids	酚酸类	458-35-5	3	-	-	-	23407.3	24734.9	30928.7	43280.9	54974.7	37441	24570	36263.9	29110.9	39772.4	40938.4	32755.4	C00590	ko00940,ko00999,ko01100,ko01110	C00590	-
mws0014	UPLC-MS/MS	193.05	134.04	-	-	194.058	C10H10O4	[M-H]-	Ferulic acid	阿魏酸	Phenolic acids	酚酸类	Phenolic acids	酚酸类	537-98-4	3	-	-	-	219784	337782	207090	682175	399503	605893	594246	185981	441970	470070	466513	255716	C01494	ko00940,ko01100,ko01110	C01494	-
pme1292	UPLC-MS/MS	167.03	123.05	-	-	168.042	C8H8O4	[M-H]-	Homogentisic acid*	高龙胆酸*	Phenolic acids	酚酸类	Phenolic acids	酚酸类	451-13-8	3	-	-	-	555226	561473	661497	449683	656039	553549	194243	246601	233673	314943	355144	719367	C00544	ko00130,ko00350,ko01100,ko01240	C00544	-
pmn001681	UPLC-MS/MS	165.09	149.06	-	-	166.099	C10H14O2	[M-H]-	1-(4-Methoxyphenyl)-1-propanol	1-(4-甲氧苯基)-1-丙醇	Phenolic acids	酚酸类	Phenolic acids	酚酸类	5349-60-0	3	-	-	-	287682	246978	239806	353531	434877	395467	259746	230054	245137	236495	267447	247658	-	-	-	-
Lmsn004674	UPLC-MS/MS	309.1	147.05	-	-	310.105	C15H18O7	[M-H]-	1-O-Cinnamoyl-β-D-glucose	1-O-肉桂酰-β-D-葡萄糖	Phenolic acids	酚酸类	Phenolic acids	酚酸类	40004-96-4	3	-	-	-	39772.4	31528.5	40899.1	130997	143856	155575	40944.2	50302.5	27899.6	56146.5	58478.4	44449.2	-	-	-	-
mws1153	UPLC-MS/MS	665.21	161.02	-	-	666.216	C31H38O16	[M-H]-	2'-Acetylacteoside	2'-乙酰毛蕊花糖苷	Phenolic acids	酚酸类	Phenolic acids	酚酸类	94492-24-7	3	-	-	-	916526	467986	501176	157156	765694	58361.1	161532	194722	370411	471485	477102	418214	-	-	-	-
pme0428	UPLC-MS/MS	237.08	103.02	-	-	238.084	C12H14O5	[M-H]-	3,4,5-Trimethoxycinnamic acid	3,4,5-三甲氧基肉桂酸	Phenolic acids	酚酸类	Phenolic acids	酚酸类	90-50-6	3	-	-	-	4583.46	4583.46	4583.46	4583.46	4583.46	4583.46	65726.4	50051.7	69430.1	22917.3	45825.6	24121.8	-	-	-	-
MWS3149	UPLC-MS/MS	151.04	107.05	-	-	152.047	C8H8O3	[M-H]-	3-Methoxybenzoic acid	3-甲氧基苯甲酸	Phenolic acids	酚酸类	Phenolic acids	酚酸类	586-38-9	3	-	-	-	52252.9	54629.8	52363.5	103285	100855	105714	94818.1	100247	103890	86275.3	95386	105729	-	-	-	-
MWSslk083	UPLC-MS/MS	183.06	153.02	-	-	184.074	C9H12O4	[M-H]-	4-Hydroxy-3,5-dimethoxybenzyl alcohol	4-羟基-3,5-二甲氧基苯甲醇	Phenolic acids	酚酸类	Phenolic acids	酚酸类	530-56-3	3	-	-	-	426360	604104	675993	182849	158253	162425	58288.7	79972.7	43806	187209	289776	269463	-	-	-	-
MWS1848	UPLC-MS/MS	135.05	92.03	-	-	136.052	C8H8O2	[M-H]-	Phenyl acetate	乙酸苯酯	Phenolic acids	酚酸类	Phenolic acids	酚酸类	122-79-2	3	-	-	-	322250	356956	239180	83914.9	82685.2	91210.9	51066.4	23120.5	32288.3	134600	139831	97345.8	C00548	-	C00548	-
MWS1888	UPLC-MS/MS	255.09	93.03	-	-	256.095	C12H16O6	[M-H]-	Phenyl-beta-D-glucoside	苯基-β-D-葡萄糖苷	Phenolic acids	酚酸类	Phenolic acids	酚酸类	1464-44-4	3	-	-	-	30992.9	43499.5	37501.9	146719	154817	150106	268469	265396	250570	147730	175916	169991	C11611	-	C11611	-
Hmln003529	UPLC-MS/MS	401.15	269.11	-	-	402.153	C18H26O10	[M-H]-	Benzyl β-primeveroside	苄基 β-樱草糖苷	Phenolic acids	酚酸类	Phenolic acids	酚酸类	130622-31-0	3	-	-	-	3.69136e+06	3.23835e+06	2.69137e+06	1.71754e+06	1.5146e+06	1.17735e+06	351419	511636	402689	1.23064e+06	1.42716e+06	1.11005e+06	-	-	-	-
Lmyn003028	UPLC-MS/MS	431.16	269.1	-	-	432.163	C19H28O11	[M-H]-	Benzyl-β-gentiobioside*	苄基-β-龙胆二糖苷*	Phenolic acids	酚酸类	Phenolic acids	酚酸类	56775-64-5	3	-	-	-	745015	757146	838031	2.25525e+06	2.49468e+06	2.64886e+06	2.87231e+06	2.5358e+06	2.48089e+06	2.10552e+06	1.92943e+06	1.7423e+06	-	-	-	-
pme0085	UPLC-MS/MS	359.08	161.02	-	-	360.084	C18H16O8	[M-H]-	Rosmarinic acid	迷迭香酸	Phenolic acids	酚酸类	Phenolic acids	酚酸类	537-15-5	3	-	-	-	45512.4	23883.8	64142.4	169610	136355	64593.1	4776.76	4776.76	4776.76	53733.8	80008.7	27826.7	C01850	ko00350,ko01100	C01850	-
MWSmce274	UPLC-MS/MS	123.05	93.04	-	-	124.052	C7H8O2	[M-H]-	Salicyl Alcohol	水杨醇；邻羟基苄醇	Phenolic acids	酚酸类	Phenolic acids	酚酸类	90-01-7	3	-	-	-	16159	18821.4	13597.9	24110.6	36684.6	45065.2	2097.34	2097.34	10486.7	23063.9	22445.5	24583	C02323	-	C02323	-
Cmdn005184	UPLC-MS/MS	783.28	607.23	-	-	784.279	C36H48O19	[M-H]-	Betonyoside D	Betonyoside D	Phenolic acids	酚酸类	Phenolic acids	酚酸类	181301-28-0	3	-	-	-	79320.8	72334.7	78179.5	170650	173054	145428	31473.8	51061.9	3892.73	114298	105788	82929.4	-	-	-	-
pme3443	UPLC-MS/MS	207.07	192.04	-	-	208.074	C11H12O4	[M-H]-	Sinapinaldehyde	芥子醛	Phenolic acids	酚酸类	Phenolic acids	酚酸类	4206-58-0	3	-	-	-	1.23094e+06	1.39993e+06	1.11922e+06	2.74474e+06	2.6752e+06	2.09958e+06	1.12458e+06	1.20054e+06	1.11733e+06	1.32015e+06	1.3219e+06	1.21538e+06	C05610	ko00940,ko01100,ko01110	C05610	-
mws0853	UPLC-MS/MS	209.08	179.07	-	-	210.089	C11H14O4	[M-H]-	Sinapyl alcohol*	芥子醇*	Phenolic acids	酚酸类	Phenolic acids	酚酸类	537-33-7	3	-	-	-	75775.2	117518	144618	407246	121425	596546	279496	310398	284852	426162	750759	400567	C02325	ko00940,ko01100,ko01110	C02325	-
Wmsn000941	UPLC-MS/MS	331.15	301.02	-	-	332.162	C19H24O5	[M-H]-	teupolin VIII	teupolin VIII	Terpenoids	萜类	Ditepenoids	二萜	-	3	-	-	-	42061.8	60906.6	43078.3	29140.9	32945.4	35320.8	87385.9	93630.4	66378.2	51210.8	60663.5	56941.3	-	-	-	-
Qmxn082003	UPLC-MS/MS	345.21	283.17	-	-	346.214	C21H30O4	[M-H]-	Parvifoline Z	Parvifoline Z	Terpenoids	萜类	Ditepenoids	二萜	-	3	-	-	-	10575.4	10575.4	10575.4	60186.9	52877.1	72494	639574	649811	597829	331373	351969	326877	-	-	-	-
Hmln002996	UPLC-MS/MS	639.19	621.18	-	-	640.2	C29H36O16	[M-H]-	β-Hydroxyacteoside	β-羟基毛蕊糖苷	Phenolic acids	酚酸类	Phenolic acids	酚酸类	95587-86-3	3	-	-	-	2.09491e+06	3.09234e+06	3.97689e+06	2.35459e+06	1.8431e+06	187513	745445	935816	784923	1.76033e+06	1.38564e+06	1.81005e+06	C17528	-	C17528	-
MWS20182	UPLC-MS/MS	195.07	136.05	-	-	196.074	C10H12O4	[M-H]-	Dihydroferulic Acid	二氢阿魏酸	Phenolic acids	酚酸类	Phenolic acids	酚酸类	1135-23-5	3	-	-	-	9090.55	9090.55	9090.55	161852	154090	203946	66476.6	45452.8	50992.2	70952.9	48792.4	59869	-	-	-	-
MWSmce264	UPLC-MS/MS	153.06	123.05	-	-	154.063	C8H10O3	[M-H]-	Hydroxytyrosol	羟基酪醇	Phenolic acids	酚酸类	Phenolic acids	酚酸类	10597-60-1	3	-	-	-	392081	544899	399095	389313	349294	379557	116222	170120	159204	372978	370625	271311	-	-	-	-
pmn001382	UPLC-MS/MS	515.12	353.09	-	-	516.127	C25H24O12	[M-H]-	Isochlorogenic acid A*	异绿原酸 A*	Phenolic acids	酚酸类	Phenolic acids	酚酸类	2450-53-5	3	-	-	-	994119	698999	722562	161095	176272	155578	395427	402282	332898	358415	348314	359303	-	-	-	-
pmn001384	UPLC-MS/MS	515.12	353.09	-	-	516.127	C25H24O12	[M-H]-	Isochlorogenic acid C*	异绿原酸 C*	Phenolic acids	酚酸类	Phenolic acids	酚酸类	57378-72-0	3	-	-	-	898238	736531	794714	168361	174947	178266	365182	327330	336158	478259	359339	369222	-	-	-	-
Lmmn001294	UPLC-MS/MS	331.1	153.02	-	-	332.111	C14H20O9	[M-H]-	Koaburaside*	3,5-二甲氧基-4-羟基苯酚-1-O-葡萄糖苷*	Phenolic acids	酚酸类	Phenolic acids	酚酸类	41653-73-0	3	-	-	-	490795	622566	853139	2.6721e+06	2.76327e+06	3.12577e+06	727032	771670	777556	1.5464e+06	1.45187e+06	1.48935e+06	-	-	-	-
Lmbn004790	UPLC-MS/MS	209.08	179.03	-	-	210.089	C11H14O4	[M-H]-	Methyl 3-(3-hydroxy-4-methoxyphenyl)propanoate*	3-羟基-4-甲氧基苯丙酸甲酯*	Phenolic acids	酚酸类	Phenolic acids	酚酸类	129150-61-4	3	-	-	-	133078	551920	175909	312478	122304	282996	393552	435660	318235	425840	144953	323848	-	-	-	-
Zmgn004894	UPLC-MS/MS	151.04	136.02	-	-	152.047	C8H8O3	[M-H]-	Methyl 4-hydroxybenzoate	对羟基苯甲酸甲酯	Phenolic acids	酚酸类	Phenolic acids	酚酸类	99-76-3	3	-	-	-	297810	323361	250734	221233	230958	218801	522678	493503	497891	335489	341564	354939	-	-	-	-
pmn001669	UPLC-MS/MS	237.08	207.03	-	-	238.084	C12H14O5	[M-H]-	Methyl sinapate	芥子酸甲酯	Phenolic acids	酚酸类	Phenolic acids	酚酸类	20733-94-2	3	-	-	-	11859.4	8896.41	11548.7	9812.65	7414.91	6925.6	53516.7	45103.2	44603.9	22557.5	21768.9	23538.3	-	-	-	-
mws0145	UPLC-MS/MS	151.04	93.03	-	-	152.047	C8H8O3	[M-H]-	O-Anisic acid (2-Methoxybenzoic acid)*	邻茴香酸(2-甲氧基苯甲酸)*	Phenolic acids	酚酸类	Phenolic acids	酚酸类	529-75-9	3	-	-	-	2751.26	2751.26	2751.26	212114	198414	110090	30915.6	30348.4	13756.3	65379.8	53904.8	51610.3	-	-	-	-
MWS2070	UPLC-MS/MS	179.07	92.03	-	-	180.079	C10H12O3	[M-H]-	Propyl 4-hydroxybenzoate	4-羟基苯甲酸丙酯	Phenolic acids	酚酸类	Phenolic acids	酚酸类	94-13-3	3	-	-	-	192680	190765	159647	20107.1	53769.6	31244.4	14156	13624.3	13091.5	61631.2	62993.6	66224.2	-	-	-	-
Cmdn004031	UPLC-MS/MS	639.2	621.19	-	-	640.2	C29H36O16	[M-H]-	R-Campneoside II*	R-Campneoside II*	Phenolic acids	酚酸类	Phenolic acids	酚酸类	91050-24-7	3	-	-	-	5.47379e+06	8.0634e+06	7.91193e+06	5.4659e+06	5.53425e+06	6.13938e+06	9.10261e+06	9.82237e+06	7.73306e+06	7.83472e+06	7.72421e+06	6.97323e+06	-	-	-	-
pmb3142	UPLC-MS/MS	299.08	137.02	-	-	300.084	C13H16O8	[M-H]-	Salicylic acid-2-O-glucoside	水杨酸-2-O-葡萄糖苷	Phenolic acids	酚酸类	Phenolic acids	酚酸类	10366-91-3	3	-	-	-	1.50472e+06	1.91092e+06	2.65976e+06	3.08044e+06	3.43177e+06	3.92307e+06	3.0328e+06	3.6034e+06	3.44656e+06	3.05219e+06	2.8702e+06	3.23934e+06	-	-	-	-
Qmdp112308	UPLC-MS/MS	361.24	301.21	-	-	360.23	C22H32O4	[M+H]+	Vitetrifolin C	Vitetrifolin C	Terpenoids	萜类	Ditepenoids	二萜	-	3	-	-	-	49966.3	49966.3	49966.3	249831	261976	337622	1.07566e+06	1.0783e+06	922365	610002	669145	645428	-	-	-	-
MWSmce455	UPLC-MS/MS	181.05	107.01	-	-	182.058	C9H10O4	[M-H]-	Vanillic acid methyl ester	香草酸甲酯	Phenolic acids	酚酸类	Phenolic acids	酚酸类	3943-74-6	3	-	-	-	42705.3	42705.3	42705.3	213526	242164	246154	3.48937e+06	3.2858e+06	3.31566e+06	1.47898e+06	1.54605e+06	1.28655e+06	-	-	-	-
Qmxn081901	UPLC-MS/MS	319.23	275.24	-	-	320.235	C20H32O3	[M-H]-	Minheryin D	Minheryin D	Terpenoids	萜类	Ditepenoids	二萜	-	3	-	-	-	6540.13	6540.13	6540.13	6540.13	6540.13	6540.13	92188.5	85156.3	96261.7	33356.8	34472	32700.6	-	-	-	-
Zmhn002301	UPLC-MS/MS	325.093	163.039	-	-	326.1	C15H18O8	[M-H]-	p-Coumaric acid-4-O-glucoside	对香豆酸-4-O-葡萄糖苷	Phenolic acids	酚酸类	Phenolic acids	酚酸类	117405-48-8	3	-	-	-	1.1898e+06	1.39159e+06	1.69689e+06	7.89516e+06	1.10628e+07	9.59099e+06	2.84595e+07	2.43923e+07	2.48069e+07	1.3408e+07	1.47917e+07	1.3535e+07	C06739	-	C06739	-
Lmmn002179	UPLC-MS/MS	313.093	107.05	-	-	314.1	C14H18O8	[M-H]-	Methyl salicylate-2-O-glucoside*	水杨酸甲酯-2-O-葡萄糖苷*	Phenolic acids	酚酸类	Phenolic acids	酚酸类	10019-60-0	1	-	-	-	150079	242954	302993	847453	858046	861341	6.65806e+06	6.22836e+06	5.43192e+06	2.94585e+06	2.75081e+06	2.67913e+06	-	-	-	-
Lmbn013410	UPLC-MS/MS	205.16	189.127	-	-	206.167	C14H22O	[M-H]-	2,4-Di-Tert-Butylphenol*	2,4-二叔丁基苯酚*	Phenolic acids	酚酸类	Phenolic acids	酚酸类	96-76-4	1	-	-	-	505692	488367	503433	587959	601713	642760	608985	484017	622410	421813	453472	466636	-	-	-	-
pmn001421	UPLC-MS/MS	337.093	191.05	-	-	338.1	C16H18O8	[M-H]-	3-O-p-Coumaroylquinic acid*	3-O-对香豆酰奎宁酸*	Phenolic acids	酚酸类	Phenolic acids	酚酸类	87099-71-6	2	-	-	-	2889.31	2889.31	2889.31	2889.31	2889.31	14446.5	2.42073e+06	2.06903e+06	2.26634e+06	1.21256e+06	986946	935106	-	-	-	-
Hmtn001302	UPLC-MS/MS	299.078	137.024	-	-	300.085	C13H16O8	[M-H]-	Glucosyloxybenzoic acid*	葡萄糖氧基苯甲酸*	Phenolic acids	酚酸类	Phenolic acids	酚酸类	-	1	-	-	-	568297	618507	862119	6.36685e+06	6.38424e+06	8.10243e+06	4.24166e+06	3.3154e+06	3.64335e+06	4.98938e+06	3.2628e+06	4.40623e+06	-	-	-	-
Lmbn001981	UPLC-MS/MS	137.024	93.0346	-	-	138.032	C7H6O3	[M-H]-	2,5-Dihydroxybenzaldehyde	2,5-二羟基苯甲醛	Phenolic acids	酚酸类	Phenolic acids	酚酸类	1194-98-5	3	-	-	-	570409	665292	640167	1.08261e+06	2.49234e+06	1.15002e+06	2.74173e+06	2.9383e+06	2.62711e+06	2.63625e+06	1.52916e+06	1.44044e+06	C05585	ko00350,ko01100	C05585	-
mws0639	UPLC-MS/MS	153.019	109.029	-	-	154.027	C7H6O4	[M-H]-	2,3-Dihydroxybenzoic Acid*	2,3-二羟基苯甲酸*	Phenolic acids	酚酸类	Phenolic acids	酚酸类	303-38-8	1	-	-	-	562605	867735	772691	1.73149e+06	1.84357e+06	1.61735e+06	1.8161e+06	1.87437e+06	1.61117e+06	1.35906e+06	1.40166e+06	1.32655e+06	C00196	ko01110	C00196	-
pme0281	UPLC-MS/MS	165.019	121.029	-	-	166.027	C8H6O4	[M-H]-	Terephthalic acid*	对苯二甲酸*	Phenolic acids	酚酸类	Phenolic acids	酚酸类	100-21-0	2	-	-	-	2.80384e+06	3.47433e+06	3.14562e+06	3.17268e+06	2.87839e+06	3.36129e+06	3.8089e+06	3.40195e+06	3.0986e+06	2.71867e+06	3.20597e+06	2.29966e+06	C06337	ko01100	C06337	-
MWS1846	UPLC-MS/MS	151.04	93.0347	-	-	152.047	C8H8O3	[M-H]-	Phenoxyacetic acid*	苯氧乙酸*	Phenolic acids	酚酸类	Phenolic acids	酚酸类	122-59-8	3	-	-	-	6187.76	6187.76	6187.76	459758	352779	352039	50461.4	34043.7	30938.8	206440	111239	136465	C02181	-	C02181	-
pmn001367	UPLC-MS/MS	315.072	153.017	-	-	316.079	C13H16O9	[M-H]-	Protocatechuic acid-4-O-glucoside	原儿茶酸-4-O-葡萄糖苷	Phenolic acids	酚酸类	Phenolic acids	酚酸类	-	3	-	-	-	3.76259e+06	3.76259e+06	3.76259e+06	3.76259e+06	2.86486e+07	1.88129e+07	8.20361e+07	5.48954e+07	3.76259e+06	3.76697e+07	3.20612e+07	3.62251e+07	-	-	-	-
pmb3066	UPLC-MS/MS	481.135	319.2	-	-	482.142	C22H26O12	[M-H]-	5-O-p-Coumaroylshikimic acid O-glucoside	5-O-对香豆酰莽草酸-O-葡萄糖苷	Phenolic acids	酚酸类	Phenolic acids	酚酸类	-	3	-	-	-	100490	95840.1	113505	134911	142368	138762	99231.2	116802	90133.8	217390	246990	122667	-	-	-	-
Lmhn002895	UPLC-MS/MS	487.09	193.06	-	-	488.096	C23H20O12	[M-H]-	Feruloylcaffeoyltartaric acid	阿魏酰咖啡酰酒石酸	Phenolic acids	酚酸类	Phenolic acids	酚酸类	-	3	-	-	-	231378	260325	343721	3.26966e+06	2.75536e+06	2.81853e+06	5.41477e+06	4.84985e+06	5.03271e+06	2.86094e+06	2.65038e+06	2.33439e+06	-	-	-	-
Lmjn003335	UPLC-MS/MS	639.193	459.151	-	-	640.2	C29H36O16	[M-H]-	Campneoside Ⅱ	紫葳新苷 Ⅱ	Phenolic acids	酚酸类	Phenolic acids	酚酸类	-	3	-	-	-	587375	809446	785017	589600	580626	662879	884814	690536	922558	664010	841517	821944	-	-	-	-
mws1150	UPLC-MS/MS	785.251	623.219	-	-	786.258	C35H46O20	[M-H]-	Echinacoside*	松果菊苷*	Phenolic acids	酚酸类	Phenolic acids	酚酸类	82854-37-3	2	-	-	-	4.16029e+06	6.95708e+06	1.01239e+07	5.05252e+06	6.57106e+06	5.06673e+06	3.58367e+06	2.59936e+06	3.4294e+06	5.23492e+06	5.51853e+06	5.06342e+06	C10450	-	C10450	-
Lmcn101912	UPLC-MS/MS	655.187	637.175	-	-	656.195	C29H36O17	[M-H]-	Hellicoside	车前酯苷	Phenolic acids	酚酸类	Phenolic acids	酚酸类	132278-04-7	3	-	-	-	6151.34	30756.7	6151.34	304353	381189	346462	550893	452689	513911	520582	476093	531486	C10466	-	C10466	-
mws1714	UPLC-MS/MS	473.072	149.008	-	-	474.08	C22H18O12	[M-H]-	Chicoric Acid	菊苣酸	Phenolic acids	酚酸类	Phenolic acids	酚酸类	70831-56-0	3	-	-	-	78330.7	22448.4	90123.7	110859	238107	108015	161445	338245	149405	180320	148345	136495	C10437	-	C10437	-
Lmbn002648	UPLC-MS/MS	163.04	119.05	-	-	164.047	C9H8O3	[M-H]-	α-Hydroxycinnamic Acid*	α-羟基肉桂酸*	Phenolic acids	酚酸类	Phenolic acids	酚酸类	5801-57-0	3	-	-	-	221775	242212	137802	2.61318e+06	2.81101e+06	2.65947e+06	586422	622023	535037	1.08603e+06	1.37381e+06	915990	C02763	ko00360,ko01100	C02763	-
Lmdn002671	UPLC-MS/MS	785.251	623.223	-	-	786.258	C35H46O20	[M-H]-	Purpureaside C*	洋地黄叶苷 C*	Phenolic acids	酚酸类	Phenolic acids	酚酸类	108648-07-3	3	-	-	-	1.17655e+06	1.28897e+06	1.38222e+06	1.21547e+06	1.05855e+06	1.12889e+06	490818	460357	446946	1.21892e+06	1.00302e+06	1.07234e+06	C10488	-	C10488	-
Lmyn006304	UPLC-MS/MS	527.156	121.031	-	-	528.163	C27H28O11	[M-H]-	Tremulacin	特里杨苷	Phenolic acids	酚酸类	Phenolic acids	酚酸类	29836-40-6	3	-	-	-	37351.7	40918.2	42576.4	420372	435765	507292	7470.34	7470.34	7470.34	118398	121143	140269	C09973	-	C09973	-
HJN003	UPLC-MS/MS	385.113	223.062	-	-	386.121	C17H22O10	[M-H]-	1-O-Sinapoyl-β-D-glucose	1-O-芥子酰-D-葡萄糖	Phenolic acids	酚酸类	Phenolic acids	酚酸类	-	3	-	-	-	800322	1.30273e+06	1.22433e+06	6.25294e+06	5.25561e+06	7.40712e+06	1.1183e+07	8.23453e+06	1.07281e+07	7.39001e+06	7.06337e+06	5.40174e+06	C01175	ko00940,ko01110	C01175	-
MWSmce407	UPLC-MS/MS	685.237	453.141	-	-	686.242	C31H42O17	[M-H]-	Specnuezhenide	特女贞苷	Phenolic acids	酚酸类	Phenolic acids	酚酸类	39011-92-2	3	-	-	-	4888.09	4888.09	4888.09	26768.3	24440.5	38448.7	66320.5	77042.7	67664.5	52454	41966	44214.8	-	-	-	-
Labn002291	UPLC-MS/MS	461.13	153.019	-	-	462.137	C19H26O13	[M-H]-	Rhamnosyl-gentisic acid-5-O-β-D-glucoside	鼠李糖基-龙胆酸-5-氧-β-D-葡萄糖苷	Phenolic acids	酚酸类	Phenolic acids	酚酸类	-	3	-	-	-	64704.8	62227.2	67212.3	37714.2	4835.89	4835.89	4835.89	4835.89	42766.7	35552.8	40454.3	24179.4	-	-	-	-
Cmrn003491	UPLC-MS/MS	679.227	637.216	-	-	680.232	C32H40O16	[M-H]-	Cistansinenside A; Salsaside E	沙苁蓉苷 A	Phenolic acids	酚酸类	Phenolic acids	酚酸类	-	3	-	-	-	98444.1	135309	107600	268158	205249	328635	21755.7	4351.14	4351.14	128015	120042	111948	-	-	-	-
Lmmn007418	UPLC-MS/MS	327.124	253.087	-	-	328.131	C19H20O5	[M-H]-	Casuarinondiol	木麻黄酮二醇	Phenolic acids	酚酸类	Phenolic acids	酚酸类	-	3	-	-	-	107731	96803.8	67966.9	47294.4	35542	38977.5	7108.41	7108.41	7108.41	47291	51793.4	36038.8	-	-	-	-
zjbp120717	UPLC-MS/MS	349.24	179.15	-	-	348.23	C21H32O4	[M+H]+	Scutegxbatine F	Scutegxbatine F	Terpenoids	萜类	Ditepenoids	二萜	-	3	-	-	-	37185.8	34905.2	37351.1	52978.9	61425.3	63117.1	110943	109515	101014	75196.9	70941.1	79781.8	-	-	-	-
Wayn107155	UPLC-MS/MS	543.151	137.025	-	-	544.158	C27H28O12	[M-H]-	Salicyolylsalicortin	水杨酰柳皮苷	Phenolic acids	酚酸类	Phenolic acids	酚酸类	-	3	-	-	-	109749	99947.2	87456.9	735701	682608	828051	39539.2	29900.5	40163.6	209251	273499	182016	-	-	-	-
WaYn004134	UPLC-MS/MS	463.124	179.035	-	-	464.132	C22H24O11	[M-H]-	Salirepin 6'-O-Caffeate	柳匍匐次苷 6'-O-咖啡酸酯	Phenolic acids	酚酸类	Phenolic acids	酚酸类	-	3	-	-	-	353949	233542	249009	248038	409655	266469	234142	68927.8	112338	165994	199574	124083	-	-	-	-
WaYn005157	UPLC-MS/MS	491.118	315.072	-	-	492.127	C23H24O12	[M-H]-	Gentisic acid 2-O-(6''-O-Feruloyl)Glucoside	龙胆酸 2-O-(6''-O-阿魏酰)葡糖苷	Phenolic acids	酚酸类	Phenolic acids	酚酸类	-	3	-	-	-	82638.3	60738.3	56226.6	162618	113541	121247	165894	117937	112458	83089.4	96334.1	120146	-	-	-	-
WaYn002949	UPLC-MS/MS	285.099	89.0245	-	-	286.105	C13H18O7	[M-H]-	Isosalicin	异水杨苷	Phenolic acids	酚酸类	Phenolic acids	酚酸类	-	3	-	-	-	230488	304036	404065	765779	988454	1.10834e+06	132408	116708	100312	203508	214094	200728	-	-	-	-
Sakn004978	UPLC-MS/MS	609.19	447.15	-	-	610.19	C28H34O15	[M-H]-	Isonuomioside	Isonuomioside	Phenolic acids	酚酸类	Phenolic acids	酚酸类	135463-05-7	3	-	-	-	852041	1.48235e+06	1.07497e+06	2.71484e+06	3.04865e+06	3.71737e+06	4.28095e+06	5.0655e+06	4.4294e+06	2.66853e+06	2.8985e+06	2.80004e+06	-	-	-	-
pmn001657	UPLC-MS/MS	365.197	167.1	-	-	366.204	C20H30O6	[M-H]-	Dehydrocinnzeylanol	脱水桂二萜醇	Phenolic acids	酚酸类	Phenolic acids	酚酸类	-	3	-	-	-	2402.23	2402.23	2402.23	12011.1	13980.4	15610	166464	142164	152492	70479.7	75340.3	72919.1	-	-	-	-
Lmgp004947	UPLC-MS/MS	637.21	177.05	-	-	636.205	C30H36O15	[M+H]+	3'-Methoxycrenatoside	3'-甲氧基黄药苷	Phenolic acids	酚酸类	Phenolic acids	酚酸类	-	3	-	-	-	134038	111339	151542	167367	102854	227286	50984.7	119834	52575.3	86585.3	97646.1	121614	-	-	-	-
MWS20164	UPLC-MS/MS	213.08	135.04	-	-	212.069	C10H12O5	[M+H]+	Oresbiusin A	Oresbiusin A	Phenolic acids	酚酸类	Phenolic acids	酚酸类	136749-45-6	2	-	-	-	130947	71673.6	84348.3	91575.6	83276.1	31274.8	36152.6	33964.1	46903	98904.8	58070.3	73712.4	-	-	-	-
Sazp002185	UPLC-MS/MS	373.15	163.07	-	-	372.142	C17H24O9	[M+H]+	Multifidol Glucoside	Multifidol Glucoside	Phenolic acids	酚酸类	Phenolic acids	酚酸类	-	3	-	-	-	7.38857e+06	6.38826e+06	6.68971e+06	9.96819e+06	8.91457e+06	8.64602e+06	2.71033e+06	2.72845e+06	2.47994e+06	5.76468e+06	7.00593e+06	6.33596e+06	-	-	-	-
Zbbn005222	UPLC-MS/MS	577.2	161.02	-	-	578.2	C28H34O13	[M-H]-	Salsaside B	Salsaside B	Phenolic acids	酚酸类	Phenolic acids	酚酸类	-	3	-	-	-	154450	215337	190613	2.46033e+06	2.3475e+06	2.44742e+06	7.64778e+06	7.84772e+06	8.32976e+06	4.36592e+06	2.99005e+06	2.97254e+06	-	-	-	-
Lmdn004051	UPLC-MS/MS	327.14	149.06	-	-	328.152	C16H24O7	[M-H]-	Thymoquinol-5-O-β-D-glucoside	百里氢醌-5-O-β-D-葡萄糖苷	Phenolic acids	酚酸类	Phenolic acids	酚酸类	-	3	-	-	-	56927.5	52616.8	173678	132437	73192	52282	76677	53427.1	137736	154065	105687	121210	-	-	-	-
Lmdp002901	UPLC-MS/MS	331.14	151.07	-	-	330.132	C15H22O8	[M+H]+	2,6-Dihydroxy-4-isopropylphenyl-1-O-β-D-glucoside	2,6-二羟基-4-异丙基苯-1-O-β-D-葡萄糖苷	Phenolic acids	酚酸类	Phenolic acids	酚酸类	-	3	-	-	-	143580	88604	116532	152268	181103	318733	482420	508165	544670	247146	281282	285443	-	-	-	-
Wmcn000044	UPLC-MS/MS	639.19	621.18	-	-	640.2	C29H36O16	[M-H]-	campneoside II*	紫葳新苷 II*	Phenolic acids	酚酸类	Phenolic acids	酚酸类	-	3	-	-	-	8.57878e+06	1.26466e+07	1.54318e+07	8.45078e+06	8.75257e+06	1.11536e+07	1.49003e+07	1.35185e+07	1.20205e+07	8.17062e+06	1.17448e+07	1.20153e+07	-	-	-	-
MWS20154	UPLC-MS/MS	315.09	163.04	-	-	314.079	C17H14O6	[M+H]+	Nepetoidin B	Nepetoidin B	Phenolic acids	酚酸类	Phenolic acids	酚酸类	55486-06-1	2	-	-	-	21675.6	21675.6	21675.6	21675.6	21675.6	21675.6	248037	233550	242919	108378	110793	109724	-	-	-	-
Walp013004	UPLC-MS/MS	337.27	263.24	-	-	336.266	C21H36O3	[M+H]+	Glycidyl Linoleate	亚油酸缩水甘油酯	Lipids	脂质	Glycerol ester	甘油酯	24305-63-3	1	-	-	-	218302	232501	221205	22371.7	21830.9	25225.2	13403.9	12657.3	30402.2	95415.9	109009	90584.5	-	-	-	-
pmp001284	UPLC-MS/MS	331.28	313.27	-	-	330.277	C19H38O4	[M+H]+	Monopalmitin*	单棕榈酸甘油酯*	Lipids	脂质	Glycerol ester	甘油酯	542-44-9	1	-	-	-	269173	276088	267022	273577	296513	238737	218696	182779	218576	194050	224066	192457	-	-	-	-
Lmxp006440	UPLC-MS/MS	331.28	313.27	-	-	330.277	C19H38O4	[M+H]+	2-Palmitoylglycerol*	2-棕榈酸单甘油酯*	Lipids	脂质	Glycerol ester	甘油酯	23470-00-0	1	-	-	-	276392	286290	277067	291695	328272	234073	212828	182417	204172	192391	208030	202270	-	-	-	-
Lmhp012042	UPLC-MS/MS	355.28	263.24	-	-	354.277	C21H38O4	[M+H]+	2-Linoleoylglycerol*	2-亚油酰甘油酯*	Lipids	脂质	Glycerol ester	甘油酯	3443-82-1	1	-	-	-	1.71348e+06	1.78534e+06	1.58255e+06	150231	174870	166951	174029	160112	68875.6	647905	714294	720496	-	-	-	-
Lmhp112042	UPLC-MS/MS	355.28	263.24	-	-	354.277	C21H38O4	[M+H]+	1-Linoleoylglycerol*	1-亚油酰甘油酯*	Lipids	脂质	Glycerol ester	甘油酯	2277-28-3	1	-	-	-	1.78424e+06	1.80536e+06	1.59791e+06	152828	184760	168935	173592	155669	71926.7	643151	781755	743227	-	-	-	-
Sazp010264	UPLC-MS/MS	771.5	609.45	-	-	770.497	C45H70O10	[M+H]+	Monogalactosyldiacylglycerol	单半乳糖甘油二酯	Lipids	脂质	Glycerol ester	甘油酯	-	1	-	-	-	9000.43	2127.41	8497.2	13766.7	10724.2	14422.3	925153	844376	542090	185088	350890	309361	-	-	-	-
Lmhp008513	UPLC-MS/MS	677.37	261.22	-	-	676.367	C33H56O14	[M+H]+	2-α-Linolenoyl-glycerol-1,3-di-O-glucoside	2-α-亚麻酸甘油酯-1,3-二-O-葡萄糖苷	Lipids	脂质	Glycerol ester	甘油酯	-	1	-	-	-	110989	133398	87598.2	46454.3	35376	38263.4	12188.4	26307.7	36120.5	70760.6	75625.2	87340.7	-	-	-	-
Lmhp009190	UPLC-MS/MS	679.39	263.24	-	-	678.383	C33H58O14	[M+H]+	2-Linoleoylglycerol-1,3-di-O-glucoside*	2-亚油酰甘油酯-1,3-二-O-葡萄糖苷*	Lipids	脂质	Glycerol ester	甘油酯	-	1	-	-	-	206021	343786	204277	44829.2	56232.2	37863.8	7572.76	7572.76	7572.76	80152.5	132171	139321	-	-	-	-
Lmhp009773	UPLC-MS/MS	515.32	261.22	-	-	514.314	C27H46O9	[M+H]+	1-α-Linolenoyl-glycerol-3-O-glucoside*	1-α-亚麻酸甘油酯-3-O-葡萄糖苷*	Lipids	脂质	Glycerol ester	甘油酯	-	1	-	-	-	93637	80234	107421	44475.5	49854.3	23569.9	53656.7	122111	108454	111652	85193.1	144974	-	-	-	-
Lmhp009526	UPLC-MS/MS	515.32	261.22	-	-	514.314	C27H46O9	[M+H]+	2-α-Linolenoyl-glycerol-1-O-glucoside*	2-α-亚麻酸甘油酯-1-O-葡萄糖苷*	Lipids	脂质	Glycerol ester	甘油酯	-	1	-	-	-	93361.8	79302.7	82769.4	50891.4	65938.5	40786	102676	101836	36931.6	75841.3	91955.8	88524.4	-	-	-	-
Lmhp008744	UPLC-MS/MS	677.37	261.22	-	-	676.367	C33H56O14	[M+H]+	1-α-Linolenoyl-glycerol-2,3-di-O-glucoside	1-α-亚麻酸甘油酯-2,3-二-O-葡萄糖苷	Lipids	脂质	Glycerol ester	甘油酯	-	2	-	-	-	118597	114669	128057	30239.6	31151.6	39153.5	24013.7	14445	13381.7	53955.6	49188.2	71337.9	-	-	-	-
Lmhp009384	UPLC-MS/MS	679.39	263.24	-	-	678.383	C33H58O14	[M+H]+	1-Linoleoylglycerol-2,3-di-O-glucoside*	1-亚油酰甘油酯-2,3-二-O-葡萄糖苷*	Lipids	脂质	Glycerol ester	甘油酯	-	1	-	-	-	183943	261713	263640	42003.3	45687.1	59105.3	8400.66	8400.66	8400.66	123378	101003	120966	-	-	-	-
Lmfp009701	UPLC-MS/MS	353.27	261.22	-	-	352.261	C21H36O4	[M+H]+	Glycerol 9,11,13-octadecatrienoyl ester*	9,11,13-十八碳三烯酸甘油酯*	Lipids	脂质	Glycerol ester	甘油酯	-	2	-	-	-	1.78729e+06	1.74511e+06	1.80099e+06	371265	395192	391925	189018	174478	165203	1.17005e+06	863524	1.12848e+06	-	-	-	-
Lmhp011562	UPLC-MS/MS	353.27	261.22	-	-	352.261	C21H36O4	[M+H]+	1-α-Linolenoyl-glycerol*	1-α-亚麻酸甘油酯*	Lipids	脂质	Glycerol ester	甘油酯	-	2	-	-	-	1.67541e+06	1.78531e+06	1.69046e+06	379126	394832	395935	187469	171451	152971	1.2634e+06	1.28163e+06	846469	-	-	-	-
Lmhp011388	UPLC-MS/MS	353.27	261.22	-	-	352.261	C21H36O4	[M+H]+	2-α-Linolenoyl-glycerol*	2-α-亚麻酸甘油酯*	Lipids	脂质	Glycerol ester	甘油酯	55268-58-1	2	-	-	-	1.81836e+06	1.90007e+06	1.91098e+06	377977	410090	431318	192375	182056	165098	1.22586e+06	787857	878688	-	-	-	-
Lmsp010763	UPLC-MS/MS	353.27	261.22	-	-	352.261	C21H36O4	[M+H]+	Monolinolenin*	单亚麻酸甘油酸*	Lipids	脂质	Glycerol ester	甘油酯	75685-85-7	2	-	-	-	1.99643e+06	1.93229e+06	1.71238e+06	398543	411832	414376	180537	161123	139773	1.15028e+06	1.19914e+06	1.1333e+06	-	-	-	-
MWSmce549	UPLC-MS/MS	303.25	57.07	-	-	302.246	C17H34O4	[M+H]+	1-Monomyristin	1-肉豆蔻酸单甘油酯	Lipids	脂质	Glycerol ester	甘油酯	589-68-4	3	-	-	-	2.00211e+06	1.88797e+06	1.68296e+06	2.18257e+06	2.32405e+06	2.43792e+06	1.44632e+06	1.0567e+06	1.17032e+06	1.03057e+06	1.18208e+06	1.07462e+06	-	-	-	-
pmb0296	UPLC-MS/MS	357.3	265.25	-	-	356.293	C21H40O4	[M+H]+	1-Oleoyl-Sn-Glycerol	单酰甘油酯(18:1)	Lipids	脂质	Glycerol ester	甘油酯	129784-87-8	3	-	-	-	1.0736e+06	1.08284e+06	908833	36659.9	54074	53035	7331.97	7331.97	7331.97	370187	386610	403505	-	-	-	-
Wagn011658	UPLC-MS/MS	653.38	397.14	-	-	654.383	C31H58O14	[M-H]-	1-Palmitoyl-Sn-Glycerol 3-O-Diglucoside	1-棕榈酰-Sn-甘油 3-O-二葡萄糖苷	Lipids	脂质	Glycerol ester	甘油酯	-	1	-	-	-	472701	547864	589320	72605.6	78382.9	114937	276631	203945	246190	416201	398480	456049	-	-	-	-
Zbfn008434	UPLC-MS/MS	515.32	279.23	-	-	516.33	C27H48O9	[M-H]-	1-O-Linoleoyl-3-O-galactopyranosyl-L-glycerol	1-O-亚麻酰基-3-O-吡喃半乳糖基-L-甘油	Lipids	脂质	Glycerol ester	甘油酯	-	1	-	-	-	2.59363e+06	3.62088e+06	1.72866e+06	701619	927528	878699	684377	640530	669221	1.47996e+06	1.67689e+06	1.64923e+06	-	-	-	-
Lmyn005812	UPLC-MS/MS	675.36	397.14	-	-	676.367	C33H56O14	[M-H]-	Gingerglycolipid A	姜糖脂 A	Lipids	脂质	Glycerol ester	甘油酯	145937-22-0	1	-	-	-	3.94039e+06	6.5957e+06	4.29524e+06	1.27477e+06	1.3977e+06	1.4574e+06	801596	782178	720360	2.07981e+06	3.11924e+06	2.5127e+06	-	-	-	-
Lmyn006011	UPLC-MS/MS	677.38	397.13	-	-	678.383	C33H58O14	[M-H]-	Gingerglycolipid B	姜糖脂 B	Lipids	脂质	Glycerol ester	甘油酯	88168-90-5	1	-	-	-	6.66016e+06	8.42669e+06	7.26029e+06	1.52507e+06	1.39614e+06	1.49685e+06	193990	139938	165880	3.79983e+06	4.0533e+06	2.93049e+06	-	-	-	-
Zbfn007626	UPLC-MS/MS	504.31	279.23	-	-	505.317	C25H48NO7P	[M-H]-	1-Linoleoyl-2-Lysophosphatidic Acid Monobutylamine Ester	1-亚油酰-2-溶血磷脂酸单丁胺酯	Lipids	脂质	Glycerol ester	甘油酯	-	1	-	-	-	5.58403e+06	4.82749e+06	4.02612e+06	2.47026e+06	1.94582e+06	2.11067e+06	373267	506265	564261	2.20592e+06	2.94164e+06	2.52404e+06	-	-	-	-
Wagn012030	UPLC-MS/MS	653.38	397.14	-	-	654.383	C31H58O14	[M-H]-	2-Palmitoyl-Sn-Glycerol 3-O-Diglucoside	2-棕榈酰-Sn-甘油 3-O-二葡萄糖苷	Lipids	脂质	Glycerol ester	甘油酯	-	2	-	-	-	448779	665111	518779	95721.4	78153.7	102474	215070	305385	197662	401098	357490	319696	-	-	-	-
Lmyn006221	UPLC-MS/MS	679.39	397.13	-	-	680.398	C33H60O14	[M-H]-	Gingerglycolipid C	姜糖脂 C	Lipids	脂质	Glycerol ester	甘油酯	-	2	-	-	-	264458	323153	212450	19867	21162.3	26823.6	11830.5	14447.3	12371.5	139667	163034	125762	-	-	-	-
Zmsp001773	UPLC-MS/MS	268.11	136.07	-	-	267.097	C10H13N5O4	[M+H]+	9-Arabinosyladenine*	9-阿拉伯糖基腺嘌呤*	Nucleotides and derivatives	核苷酸及其衍生物	Nucleotides and derivatives	核苷酸及其衍生物	-	1	-	-	-	4.23856e+07	4.86399e+07	4.61607e+07	2.27378e+07	2.32788e+07	2.34108e+07	6.21738e+07	6.96565e+07	5.83208e+07	3.96449e+07	4.22655e+07	4.50329e+07	-	-	-	-
MWSmce333	UPLC-MS/MS	284.099	152.056	-	-	283.092	C10H13N5O5	[M+H]+	Crotonoside; 2-Hydroxyadenosine	巴豆苷; 2-羟基腺苷	Nucleotides and derivatives	核苷酸及其衍生物	Nucleotides and derivatives	核苷酸及其衍生物	1818-71-9	3	-	-	-	2.61614e+06	3.06002e+06	3.0925e+06	863773	810521	791453	3.56282e+06	3.80751e+06	3.88627e+06	2.48584e+06	2.27475e+06	2.6311e+06	C08432	-	C08432	-
pme0230	UPLC-MS/MS	268.1	136.06	-	-	267.097	C10H13N5O4	[M+H]+	Adenosine*	腺苷*	Nucleotides and derivatives	核苷酸及其衍生物	Nucleotides and derivatives	核苷酸及其衍生物	58-61-7	1	-	-	-	4.35807e+07	4.88371e+07	4.58616e+07	2.31892e+07	2.43959e+07	2.4265e+07	6.49863e+07	7.07515e+07	5.73461e+07	4.19112e+07	4.74007e+07	4.70865e+07	C00212	ko00230,ko01100,ko01232,ko02010	C00212	-
pme1474	UPLC-MS/MS	298.1	136.06	-	-	297.09	C11H15N5O3S	[M+H]+	5'-Deoxy-5'-(methylthio)adenosine	5-脱氧-5-甲硫腺苷	Nucleotides and derivatives	核苷酸及其衍生物	Nucleotides and derivatives	核苷酸及其衍生物	2457-80-9	1	-	-	-	1.63066e+07	1.78614e+07	1.83544e+07	2.68429e+07	2.99927e+07	3.41338e+07	4.6912e+07	5.00002e+07	4.01179e+07	2.94416e+07	3.65459e+07	3.76546e+07	C00170	ko00270,ko00908,ko01100	C00170	-
pme1178	UPLC-MS/MS	284.1	152.06	-	-	283.092	C10H13N5O5	[M+H]+	Guanosine	鸟苷	Nucleotides and derivatives	核苷酸及其衍生物	Nucleotides and derivatives	核苷酸及其衍生物	118-00-3	1	-	-	-	2.35085e+07	2.44044e+07	2.1385e+07	1.40847e+07	1.59349e+07	1.46332e+07	5.08178e+07	4.79299e+07	4.28208e+07	2.42164e+07	2.68463e+07	2.49477e+07	C00387	ko00230,ko01100,ko01232,ko02010	C00387	-
ML10180524	UPLC-MS/MS	244.09	112.05	-	-	243.085	C9H13N3O5	[M+H]+	Cytarabine	胞嘧啶阿拉伯糖苷	Nucleotides and derivatives	核苷酸及其衍生物	Nucleotides and derivatives	核苷酸及其衍生物	147-94-4	1	-	-	-	18645.2	18645.2	18645.2	93226	113461	132570	4.14214e+06	4.4676e+06	4.2197e+06	605769	395222	591679	C02961	-	C02961	-
pme3961	UPLC-MS/MS	252.11	136.06	-	-	251.102	C10H13N5O3	[M+H]+	2'-Deoxyadenosine*	2'-脱氧腺苷*	Nucleotides and derivatives	核苷酸及其衍生物	Nucleotides and derivatives	核苷酸及其衍生物	958-09-8	1	-	-	-	704084	903907	859401	158928	220707	210863	740111	668948	673111	468935	567873	555216	C00559	ko00230,ko01100,ko01232,ko02010	C00559	-
pme1109	UPLC-MS/MS	152.06	135.03	-	-	151.049	C5H5N5O	[M+H]+	Guanine	鸟嘌呤	Nucleotides and derivatives	核苷酸及其衍生物	Nucleotides and derivatives	核苷酸及其衍生物	73-40-5	1	-	-	-	745458	759943	650847	485489	530507	549788	1.97439e+06	1.61052e+06	1.66462e+06	945101	1.06591e+06	945299	C00242	ko00230,ko01100,ko01232	C00242	-
pme3337	UPLC-MS/MS	384.12	252.07	-	-	383.108	C14H17N5O8	[M+H]+	Succinyladenosine	琥珀酰腺苷	Nucleotides and derivatives	核苷酸及其衍生物	Nucleotides and derivatives	核苷酸及其衍生物	4542-23-8	1	-	-	-	8.4829e+06	9.28069e+06	7.7484e+06	3.77954e+06	3.96903e+06	3.88841e+06	5.1769e+06	5.20114e+06	5.08697e+06	4.6601e+06	4.92957e+06	4.53102e+06	-	-	-	-
Zmjp000966	UPLC-MS/MS	268.11	136.06	-	-	267.097	C10H13N5O4	[M+H]+	Vidarabine	阿糖腺苷	Nucleotides and derivatives	核苷酸及其衍生物	Nucleotides and derivatives	核苷酸及其衍生物	5536-17-4	1	-	-	-	4.34157e+07	4.65612e+07	4.60586e+07	2.26247e+07	2.36596e+07	2.19483e+07	6.59955e+07	6.91238e+07	5.55119e+07	4.09144e+07	4.27311e+07	4.39066e+07	-	-	-	-
Lmqp000329	UPLC-MS/MS	296.07	104.11	-	-	295.057	C8H14N3O7P	[M+H]+	5-Aminoimidazole ribonucleotide	5-氨基咪唑核糖核苷酸	Nucleotides and derivatives	核苷酸及其衍生物	Nucleotides and derivatives	核苷酸及其衍生物	25635-88-5	1	-	-	-	1.29491e+06	1.50381e+06	1.39627e+06	2.45139e+06	1.91119e+06	2.09031e+06	2.25103e+06	2.472e+06	1.92674e+06	1.8283e+06	2.14493e+06	2.00344e+06	-	-	-	-
Wcdn001824	UPLC-MS/MS	315.07	153.02	-	-	316.079	C13H16O9	[M-H]-	2,5-Dihydroxybenzoic acid-5-O-glucoside	2,5-二羟基苯甲酸-5-O-葡萄糖苷	Phenolic acids	酚酸类	Phenolic acids	酚酸类	-	1	-	-	-	1.375e+07	1.73858e+07	2.38343e+07	5.23488e+07	5.8057e+07	6.71225e+07	2.8392e+07	3.61375e+07	3.64573e+07	38891966	6.31256e+07	3.30098e+07	-	-	-	-
Wdtp002974	UPLC-MS/MS	404.15	207.06	-	-	403.149	C18H21N5O6	[M+H]+	N-(p-hydroxybenzyl) adenosine	N-(对羟基苄基)腺苷	Nucleotides and derivatives	核苷酸及其衍生物	Nucleotides and derivatives	核苷酸及其衍生物	-	2	-	-	-	37693.4	32321.4	48168.6	283698	310347	272576	2.1176e+06	1.65889e+06	2.42494e+06	1.07765e+06	929642	1.09336e+06	-	-	-	-
Zmmp002106	UPLC-MS/MS	120.08	77.04	-	-	119.07	C3H9N3O2	[M+H]+	4-methyl-1,5,2,3-dioxadiazinan-2-amine	4-甲基-1,5,2,3-二恶二嗪-2-胺	Nucleotides and derivatives	核苷酸及其衍生物	Nucleotides and derivatives	核苷酸及其衍生物	-	2	-	-	-	1.26565e+06	1.42691e+06	1.29708e+06	3.12765e+06	3.23321e+06	3.54544e+06	5.08925e+06	5.0858e+06	4.24245e+06	2.94685e+06	3.65216e+06	3.29986e+06	-	-	-	-
pmb0964	UPLC-MS/MS	366.18	204.12	-	-	365.17	C16H23N5O5	[M+H]+	Isopentenyladenine-7-N-glucoside	异戊烯基腺苷-7-N-葡萄糖苷	Nucleotides and derivatives	核苷酸及其衍生物	Nucleotides and derivatives	核苷酸及其衍生物	-	3	-	-	-	1.17062e+06	1.5521e+06	1.68793e+06	245900	234952	197794	45326.1	99501.3	88651.2	353716	353585	337403	-	-	-	-
pmc0281	UPLC-MS/MS	400.15	136.06	-	-	399.139	C15H21N5O8	[M+H]+	Ribosyladenosine	核糖腺苷	Nucleotides and derivatives	核苷酸及其衍生物	Nucleotides and derivatives	核苷酸及其衍生物	-	3	-	-	-	1.86629e+07	2.31233e+07	2.20301e+07	364307	572166	507919	1.12282e+06	864056	844890	6.95914e+06	8.41017e+06	7.85924e+06	-	-	-	-
pme3732	UPLC-MS/MS	244.09	112.05	-	-	243.085	C9H13N3O5	[M+H]+	Cytidine	胞苷	Nucleotides and derivatives	核苷酸及其衍生物	Nucleotides and derivatives	核苷酸及其衍生物	65-46-3	2	-	-	-	1.97298e+06	4.92793e+06	3.20095e+06	556754	376680	375094	1.27447e+06	1.7916e+06	1.36309e+06	1.0968e+06	1.01662e+06	864104	C00475	ko00240,ko01100,ko01232,ko02010	C00475	-
MWSmce116	UPLC-MS/MS	252.1	136.06	-	-	251.102	C10H13N5O3	[M+H]+	5'-Deoxyadenosine*	5-脱氧腺嘌呤核苷*	Nucleotides and derivatives	核苷酸及其衍生物	Nucleotides and derivatives	核苷酸及其衍生物	4754-39-6	1	-	-	-	625839	742839	554376	165284	173938	178143	622499	621111	536715	399465	448759	432468	C05198	-	C05198	-
mws1715	UPLC-MS/MS	252.11	136.06	-	-	251.102	C10H13N5O3	[M+H]+	Cordycepin (3'-Deoxyadenosine)*	虫草素(3'-脱氧腺苷)*	Nucleotides and derivatives	核苷酸及其衍生物	Nucleotides and derivatives	核苷酸及其衍生物	73-03-0	1	-	-	-	322122	504412	357327	83548.1	114094	107731	379923	407596	342217	264561	305305	284811	C08431	-	C08431	-
pme3184	UPLC-MS/MS	332.08	136.06	-	-	331.068	C10H14N5O6P	[M+H]+	2'-Deoxyadenosine-5'-monophosphate	2'-脱氧腺苷-5'-单磷酸	Nucleotides and derivatives	核苷酸及其衍生物	Nucleotides and derivatives	核苷酸及其衍生物	653-63-4	3	-	-	-	377705	279108	313142	815844	749274	816527	1.06235e+06	899950	827353	686463	617135	695860	C00360	ko00230,ko01100,ko01232	C00360	-
pme1194	UPLC-MS/MS	228.1	112.05	-	-	227.091	C9H13N3O4	[M+H]+	2'-Deoxycytidine	2'-脱氧胞苷	Nucleotides and derivatives	核苷酸及其衍生物	Nucleotides and derivatives	核苷酸及其衍生物	951-77-9	3	-	-	-	1.59478e+06	1.35064e+06	1.49329e+06	323513	569761	350730	64702.6	64702.6	64702.6	589103	586791	550513	C00881	ko00240,ko01100,ko01232,ko02010	C00881	-
pme1184	UPLC-MS/MS	268.1	152.06	-	-	267.097	C10H13N5O4	[M+H]+	2'-Deoxyguanosine	2'-脱氧鸟苷	Nucleotides and derivatives	核苷酸及其衍生物	Nucleotides and derivatives	核苷酸及其衍生物	961-07-9	3	-	-	-	4.30856e+06	4.99689e+06	4.34429e+06	467566	503988	577327	415148	363712	346858	1.39948e+06	1.62713e+06	1.43473e+06	C00330	ko00230,ko01100,ko01232,ko02010	C00330	-
pmc0066	UPLC-MS/MS	333.06	137.05	-	-	332.052	C10H13N4O7P	[M+H]+	2'-Deoxyinosine-5'-monophosphate	2'-脱氧肌苷-5'-单磷酸	Nucleotides and derivatives	核苷酸及其衍生物	Nucleotides and derivatives	核苷酸及其衍生物	3393-18-8	3	-	-	-	6.81996e+06	4.2838e+06	6.48099e+06	4.74651e+06	4.29546e+06	2.18988e+06	5.87427e+06	7.16751e+06	5.81017e+06	9.45065e+06	8.6451e+06	7.94236e+06	C06196	ko00230,ko01232	C06196	-
pme3968	UPLC-MS/MS	166.07	149.05	-	-	165.065	C6H7N5O	[M+H]+	7-Methylguanine	7-甲基鸟嘌呤	Nucleotides and derivatives	核苷酸及其衍生物	Nucleotides and derivatives	核苷酸及其衍生物	578-76-7	3	-	-	-	251220	271570	242431	137384	169114	158898	153902	104407	150885	203336	195516	178754	C02242	-	C02242	-
pme2801	UPLC-MS/MS	167.06	150.03	-	-	166.049	C6H6N4O2	[M+H]+	7-Methylxanthine	7-甲基黄嘌呤	Nucleotides and derivatives	核苷酸及其衍生物	Nucleotides and derivatives	核苷酸及其衍生物	552-62-5	3	-	-	-	137811	123458	106012	71387.3	92450.7	76697.6	67471.2	79872.1	65907.2	108967	62431.8	69216.1	C16353	ko00232,ko01100,ko01110	C16353	-
pmb0981	UPLC-MS/MS	348.07	136.06	-	-	347.063	C10H14N5O7P	[M+H]+	Adenosine 5'-monophosphate	腺苷-5'-单磷酸	Nucleotides and derivatives	核苷酸及其衍生物	Nucleotides and derivatives	核苷酸及其衍生物	61-19-8	3	-	-	-	408896	439080	386755	377206	448733	416921	138105	84567.9	337179	524274	273671	307059	C00020	ko00230,ko00908,ko01100,ko01110,ko01232,ko01240	C00020	-
mws0255	UPLC-MS/MS	112.05	95.02	-	-	111.043	C4H5N3O	[M+H]+	Cytosine	胞嘧啶	Nucleotides and derivatives	核苷酸及其衍生物	Nucleotides and derivatives	核苷酸及其衍生物	71-30-7	3	-	-	-	470535	516941	517175	111679	119656	98334.1	894133	1.15159e+06	893674	349610	342990	377788	C00380	ko00240,ko01100,ko01232	C00380	-
pmb0998	UPLC-MS/MS	364.07	152.06	-	-	363.058	C10H14N5O8P	[M+H]+	Guanosine 5'-monophosphate	鸟苷 5'-单磷酸	Nucleotides and derivatives	核苷酸及其衍生物	Nucleotides and derivatives	核苷酸及其衍生物	85-32-5	3	-	-	-	144693	107548	115563	74916.4	75521.7	62845.2	16941.5	33727.3	87019.1	97884.8	69342.8	69271.7	C00144	ko00230,ko01100,ko01232	C00144	-
pme0033	UPLC-MS/MS	137.05	119.04	-	-	136.038	C5H4N4O	[M+H]+	Hypoxanthine	次黄嘌呤	Nucleotides and derivatives	核苷酸及其衍生物	Nucleotides and derivatives	核苷酸及其衍生物	68-94-0	3	-	-	-	335018	144796	325118	779019	537640	782092	28959.2	28959.2	195791	319480	487932	433487	C00262	ko00230,ko01100,ko01232	C00262	-
pme1119	UPLC-MS/MS	269.09	137.05	-	-	268.081	C10H12N4O5	[M+H]+	Inosine	肌苷	Nucleotides and derivatives	核苷酸及其衍生物	Nucleotides and derivatives	核苷酸及其衍生物	58-63-9	3	-	-	-	1.66379e+06	2.28442e+06	2.04368e+06	349127	360169	334016	260011	257091	255222	586679	727687	703762	C00294	ko00230,ko01100,ko01232,ko02010	C00294	-
pmb0532	UPLC-MS/MS	349.05	137.05	-	-	348.047	C10H13N4O8P	[M+H]+	Inosine 5'-monophosphate	5'-肌苷酸	Nucleotides and derivatives	核苷酸及其衍生物	Nucleotides and derivatives	核苷酸及其衍生物	131-99-7	3	-	-	-	81189	90504.2	108041	95457.4	105170	86411.6	9908.75	9908.75	9908.75	62243.3	49543.8	78741.6	C00130	ko00230,ko01100,ko01110,ko01232,ko01240	C00130	-
pme2060	UPLC-MS/MS	204.12	136.06	-	-	203.117	C10H13N5	[M+H]+	N6-Isopentenyladenine	N6-异戊烯腺嘌呤	Nucleotides and derivatives	核苷酸及其衍生物	Nucleotides and derivatives	核苷酸及其衍生物	2365-40-4	3	-	-	-	87650.2	81958.2	119581	27942.8	19484.4	35765.6	71517.9	67781	79943.2	52368.2	65927.3	41250.9	C04083	ko00908,ko01110,ko04075	C04083	-
pmb0197	UPLC-MS/MS	298.11	166.07	-	-	297.107	C11H15N5O5	[M+H]+	N7-Methylguanosine	N7-甲基鸟苷	Nucleotides and derivatives	核苷酸及其衍生物	Nucleotides and derivatives	核苷酸及其衍生物	20244-86-4	3	-	-	-	129667	149218	127741	112220	100984	100889	175491	190391	199550	110501	100894	127127	C20674	-	C20674	-
pmb0530	UPLC-MS/MS	664.12	136.06	-	-	663.109	C21H27N7O14P2	[M+H]+	Nicotinic acid adenine dinucleotide	烟酸腺嘌呤二核苷酸	Nucleotides and derivatives	核苷酸及其衍生物	Nucleotides and derivatives	核苷酸及其衍生物	53-84-9	3	-	-	-	466419	324110	493028	337103	539247	378855	872175	966279	907301	704673	382190	531525	C00003	ko00190,ko00730,ko00760,ko01100,ko01240	C00003	-
pmf0289	UPLC-MS/MS	336.17	148.06	-	-	335.159	C15H21N5O4	[M+H]+	Riboprine	利波腺苷	Nucleotides and derivatives	核苷酸及其衍生物	Nucleotides and derivatives	核苷酸及其衍生物	7724-76-7	3	-	-	-	107367	162671	153306	59242.5	70519.6	94021.5	20504.8	4100.96	4100.96	82752.7	79088.9	89333.3	C16427	ko00908,ko01110	C16427	-
pme0264	UPLC-MS/MS	243.1	127.05	-	-	242.09	C10H14N2O5	[M+H]+	Thymidine	胸苷	Nucleotides and derivatives	核苷酸及其衍生物	Nucleotides and derivatives	核苷酸及其衍生物	50-89-5	3	-	-	-	573497	675095	530806	181262	29901.3	76778.8	142670	164981	71829.4	261342	260967	260350	C00214	ko00240,ko01100,ko01232	C00214	-
MWS4354	UPLC-MS/MS	282.12	150.08	-	-	281.112	C11H15N5O4	[M+H]+	N6-methyladenosine	N6-甲基腺苷	Nucleotides and derivatives	核苷酸及其衍生物	Nucleotides and derivatives	核苷酸及其衍生物	1867-73-8	2	-	-	-	180409	193129	185778	116225	76071.3	78160	257089	266020	241115	141498	141258	161238	-	-	-	-
MWSmce295	UPLC-MS/MS	245.07	113.03	-	-	244.07	C9H12N2O6	[M+H]+	1-Arabinosyluracil	1-阿拉伯糖基脲嘧啶	Nucleotides and derivatives	核苷酸及其衍生物	Nucleotides and derivatives	核苷酸及其衍生物	3083-77-0	2	-	-	-	2.26888e+06	1.69351e+06	2.44678e+06	410232	386214	358586	819084	893377	801711	640756	858185	690142	-	-	-	-
Zmmp002333	UPLC-MS/MS	146.12	83.09	-	-	145.11	C7H15NO2	[M+H]+	2-Aminoheptanoic acid	2-氨基庚酸	Nucleotides and derivatives	核苷酸及其衍生物	Nucleotides and derivatives	核苷酸及其衍生物	44902-02-5	2	-	-	-	353848	398717	377601	367108	397538	438259	479817	469929	420132	396605	391034	388208	-	-	-	-
pme3967	UPLC-MS/MS	312.13	180.09	-	-	311.123	C12H17N5O5	[M+H]+	2-(Dimethylamino)guanosine*	2-(二甲基氨基)鸟苷*	Nucleotides and derivatives	核苷酸及其衍生物	Nucleotides and derivatives	核苷酸及其衍生物	2140-67-2	3	-	-	-	585613	569567	629254	384993	414893	407600	1.04048e+06	1.01798e+06	841585	576864	537383	596443	-	-	-	-
Hmhp001812	UPLC-MS/MS	282.12	136.06	-	-	281.112	C11H15N5O4	[M+H]+	2'-O-Methyladenosine	2-甲氧基腺苷	Nucleotides and derivatives	核苷酸及其衍生物	Nucleotides and derivatives	核苷酸及其衍生物	2140-79-6	3	-	-	-	392614	412500	418474	105921	121336	149270	323081	268183	232948	229756	225621	261087	-	-	-	-
MWSslk102	UPLC-MS/MS	155.01	119.04	-	-	154.005	C5H3ClN4	[M+H]+	6-Chloropurine	6-氯嘌呤	Nucleotides and derivatives	核苷酸及其衍生物	Nucleotides and derivatives	核苷酸及其衍生物	87-42-3	3	-	-	-	52849.3	42982	39068.5	128904	115636	137498	43127.3	28831.2	12942.3	40140.8	60844.4	73070.4	-	-	-	-
MWS2984	UPLC-MS/MS	153.05	136.03	-	-	152.045	C4H4N6O	[M+H]+	8-Azaguanine	8-氮鸟嘌呤	Nucleotides and derivatives	核苷酸及其衍生物	Nucleotides and derivatives	核苷酸及其衍生物	134-58-7	3	-	-	-	1.71285e+06	1.28506e+06	1.27334e+06	428562	556790	533669	206526	195742	238757	442533	513513	499487	-	-	-	-
pme3350	UPLC-MS/MS	284.1	168.08	-	-	283.092	C10H13N5O5	[M+H]+	8-Hydroxy-2-deoxyguanosine	8-羟基-2-脱氧鸟苷	Nucleotides and derivatives	核苷酸及其衍生物	Nucleotides and derivatives	核苷酸及其衍生物	88847-89-6	3	-	-	-	39259.1	47274.6	41564.8	9093.07	16845.2	8083.25	1616.65	1616.65	1616.65	21541.1	22148.9	18532.6	-	-	-	-
pme1173	UPLC-MS/MS	137.05	110.03	-	-	136.038	C5H4N4O	[M+H]+	Allopurinol	别嘌呤醇	Nucleotides and derivatives	核苷酸及其衍生物	Nucleotides and derivatives	核苷酸及其衍生物	315-30-0	3	-	-	-	978042	876765	818689	409148	488160	431728	258495	429577	245874	454992	441638	359228	-	-	-	-
MWS5173	UPLC-MS/MS	112.05	70.03	-	-	111.043	C4H5N3O	[M+H]+	Isocytosine	异胞嘧啶	Nucleotides and derivatives	核苷酸及其衍生物	Nucleotides and derivatives	核苷酸及其衍生物	108-53-2	3	-	-	-	488496	559605	536726	606553	612118	656636	3.28038e+06	3.4288e+06	3.6494e+06	1.43448e+06	1.30213e+06	1.34479e+06	-	-	-	-
pme0183	UPLC-MS/MS	152.06	135.03	-	-	151.049	C5H5N5O	[M+H]+	Isoguanine	异鸟嘌呤	Nucleotides and derivatives	核苷酸及其衍生物	Nucleotides and derivatives	核苷酸及其衍生物	3373-53-3	3	-	-	-	137793	162790	187152	46336.9	54253.4	43284.3	217601	156364	159156	132306	143850	142630	-	-	-	-
Lmcp002302	UPLC-MS/MS	312.13	180.09	-	-	311.123	C12H17N5O5	[M+H]+	N6-(2-Hydroxyethyl)adenosine*	N6-(2-羟乙基)腺苷*	Nucleotides and derivatives	核苷酸及其衍生物	Nucleotides and derivatives	核苷酸及其衍生物	4338-48-1	3	-	-	-	526544	697919	538111	333229	385724	424364	1.04122e+06	991722	841585	557171	566550	582588	-	-	-	-
pmb2922	UPLC-MS/MS	565.05	323.03	-	-	566.055	C15H24N2O17P2	[M-H]-	Uridine 5'-diphospho-D-glucose	尿苷 5'-二磷酸-D-葡萄糖	Nucleotides and derivatives	核苷酸及其衍生物	Nucleotides and derivatives	核苷酸及其衍生物	133-89-1	1	-	-	-	1.51193e+07	1.66296e+07	1.6752e+07	1.29677e+07	1.5845e+07	1.09176e+07	9.25204e+06	9.96505e+06	1.51052e+07	1.1356e+07	9.53174e+06	9.71179e+06	C00029	ko00040,ko00052,ko00053,ko00500,ko00520,ko00524,ko00561,ko00908,ko01100,ko01110,ko01240,ko01250	C00029	-
pme0256	UPLC-MS/MS	151.03	108.02	-	-	152.033	C5H4N4O2	[M-H]-	Xanthine	黄嘌呤	Nucleotides and derivatives	核苷酸及其衍生物	Nucleotides and derivatives	核苷酸及其衍生物	69-89-6	1	-	-	-	474124	322930	543249	248023	217110	293992	38336.7	38336.7	38336.7	191683	212302	198843	C00385	ko00230,ko00232,ko01100,ko01110,ko01232	C00385	-
mws0668	UPLC-MS/MS	283.07	151.03	-	-	284.076	C10H12N4O6	[M-H]-	Xanthosine	黄苷	Nucleotides and derivatives	核苷酸及其衍生物	Nucleotides and derivatives	核苷酸及其衍生物	146-80-5	1	-	-	-	7.45728e+07	9.22027e+07	1.14592e+08	6.6407e+07	7.34087e+07	7.56062e+07	7.36763e+06	9.08272e+06	9.1642e+06	6.6508e+07	5.68774e+07	6.82366e+07	C01762	ko00230,ko00232,ko01100,ko01110,ko01232,ko02010	C01762	-
mws0609	UPLC-MS/MS	344.04	150.04	-	-	345.047	C10H12N5O7P	[M-H]-	Guanosine 3',5'-cyclic monophosphate	鸟苷 3',5'-环单磷酸	Nucleotides and derivatives	核苷酸及其衍生物	Nucleotides and derivatives	核苷酸及其衍生物	7665-99-8	1	-	-	-	160809	192397	310052	126293	112910	133306	199942	231398	232405	193117	204741	169833	C00942	ko00230,ko01100	C00942	-
mws1060	UPLC-MS/MS	267.07	135.03	-	-	268.081	C10H12N4O5	[M-H]-	9-(Arabinosyl)hypoxanthine	9-(阿拉伯糖基)次黄嘌呤	Nucleotides and derivatives	核苷酸及其衍生物	Nucleotides and derivatives	核苷酸及其衍生物	7013-16-3	1	-	-	-	2.40827e+06	2.64577e+06	3.73645e+06	1.68152e+06	1.61169e+06	2.01242e+06	579733	712612	846995	1.56927e+06	1.57238e+06	1.51841e+06	-	-	-	-
mws1409	UPLC-MS/MS	579.03	403	-	-	580.034	C15H22N2O18P2	[M-H]-	Uridine-5'-diphosphoglucuronic acid	尿苷-5'-二磷酸葡萄糖醛酸	Nucleotides and derivatives	核苷酸及其衍生物	Nucleotides and derivatives	核苷酸及其衍生物	-	3	-	-	-	113171	140767	117309	30283.9	43363.9	24563.1	34056.3	53135.8	43909.2	55624.5	77716.1	30667.6	-	-	-	-
Lmqn000780	UPLC-MS/MS	606.08	384.98	-	-	607.082	C17H27N3O17P2	[M-H]-	Uridine 5'-diphospho-N-acetylglucosamine	尿苷二磷酸乙酰葡萄糖胺	Nucleotides and derivatives	核苷酸及其衍生物	Nucleotides and derivatives	核苷酸及其衍生物	528-04-1	2	-	-	-	202850	202132	245852	177770	140729	123040	190067	162969	195458	227629	154336	124543	C00043	ko00520,ko00524,ko01100,ko01250	C00043	-
mws0248	UPLC-MS/MS	243.06	110.02	-	-	244.07	C9H12N2O6	[M-H]-	Uridine	尿嘧啶核苷	Nucleotides and derivatives	核苷酸及其衍生物	Nucleotides and derivatives	核苷酸及其衍生物	58-96-8	2	-	-	-	741767	518889	965966	505265	403735	470791	407989	850685	790061	616335	768846	571383	C00299	ko00240,ko01100,ko01232,ko02010	C00299	-
mws0884	UPLC-MS/MS	328.05	134.05	-	-	329.053	C10H12N5O6P	[M-H]-	Cyclic 3',5'-Adenylic acid	环-3',5'-腺嘌呤核苷酸	Nucleotides and derivatives	核苷酸及其衍生物	Nucleotides and derivatives	核苷酸及其衍生物	60-92-4	2	-	-	-	217778	241959	333259	148012	145947	189324	448818	480094	470353	309342	353335	300980	C00575	ko00230,ko01100	C00575	-
pmb2507	UPLC-MS/MS	213.02	96.97	-	-	214.024	C5H11O7P	[M-H]-	2-Deoxyribose-1-phosphate*	2-脱氧核糖-1-磷酸*	Nucleotides and derivatives	核苷酸及其衍生物	Nucleotides and derivatives	核苷酸及其衍生物	17210-42-3	3	-	-	-	2.6126e+06	1.72774e+06	3.15927e+06	803375	827234	801941	328324	433263	401773	954106	925118	985884	C00672	ko00030,ko00240,ko01100	C00672	-
mws0863	UPLC-MS/MS	213.02	96.97	-	-	214.024	C5H11O7P	[M-H]-	2-Deoxyribose-5'-phosphate*	2-脱氧核糖-5'-磷酸*	Nucleotides and derivatives	核苷酸及其衍生物	Nucleotides and derivatives	核苷酸及其衍生物	102916-66-5	3	-	-	-	97709.4	82794.2	94559.2	152154	151599	158868	38696.6	52970.8	33576.7	80001.6	64627.2	56611.1	C00673	ko00030,ko01100	C00673	-
Zmjn001030	UPLC-MS/MS	346.06	211	-	-	347.063	C10H14N5O7P	[M-H]-	Adenosine 2'-Phosphate	腺苷-2'-磷酸	Nucleotides and derivatives	核苷酸及其衍生物	Nucleotides and derivatives	核苷酸及其衍生物	130-49-4	3	-	-	-	143171	213757	212632	52858.9	55503.4	55936.7	139171	129465	118183	127684	110462	117583	C00946	-	C00946	-
pme2117	UPLC-MS/MS	426.02	158.93	-	-	427.029	C10H15N5O10P2	[M-H]-	Adenosine 5'-diphosphate	腺苷-5'-二磷酸	Nucleotides and derivatives	核苷酸及其衍生物	Nucleotides and derivatives	核苷酸及其衍生物	58-64-0	3	-	-	-	561931	491900	554765	32234.1	32234.1	32234.1	240848	503201	318959	161170	230736	233027	C00008	ko00190,ko00195,ko00230,ko00908,ko01100,ko01110,ko01232,ko01240	C00008	-
MWSmce668	UPLC-MS/MS	505.99	158.93	-	-	506.996	C10H16N5O13P3	[M-H]-	ATP; Adenosine 5'-Triphosphate	腺嘌呤核苷三磷酸	Nucleotides and derivatives	核苷酸及其衍生物	Nucleotides and derivatives	核苷酸及其衍生物	56-65-5	3	-	-	-	77966.7	92379.5	102929	3932.09	3932.09	3932.09	3932.09	3932.09	3932.09	19662.8	25948.2	19660.5	C00002	ko00190,ko00195,ko00230,ko00908,ko01100,ko01110,ko01232,ko01240	C00002	-
MWS5083	UPLC-MS/MS	455.1	96.97	-	-	456.105	C17H21N4O9P	[M-H]-	Flavin Single Nucleotide(FMN)	黄素单核苷酸(FMN)	Nucleotides and derivatives	核苷酸及其衍生物	Nucleotides and derivatives	核苷酸及其衍生物	6184-17-4	3	-	-	-	604767	538435	559518	312611	392351	358219	409312	484557	380428	448283	429375	403499	C00061	ko00190,ko00740,ko01100,ko01110,ko01240	C00061	-
pme2651	UPLC-MS/MS	742.07	620.02	-	-	743.076	C21H28N7O17P3	[M-H]-	NADP (Nicotinamide adenine dinucleotide phosphate)	烟酰胺腺嘌呤二核苷酸磷酸	Nucleotides and derivatives	核苷酸及其衍生物	Nucleotides and derivatives	核苷酸及其衍生物	53-59-8	3	-	-	-	429337	561521	770503	184212	222551	226446	482574	952198	762899	478444	586083	508932	C00006	ko00195,ko00480,ko00760,ko01100,ko01240	C00006	-
pme0257	UPLC-MS/MS	111.02	67.03	-	-	112.027	C4H4N2O2	[M-H]-	Uracil	尿嘧啶	Nucleotides and derivatives	核苷酸及其衍生物	Nucleotides and derivatives	核苷酸及其衍生物	66-22-8	3	-	-	-	145597	163323	235693	21690.3	21690.3	21690.3	155469	178219	123487	108452	117552	133857	C00106	ko00240,ko00410,ko00770,ko01100,ko01232	C00106	-
pme3007	UPLC-MS/MS	402.99	158.93	-	-	404.002	C9H14N2O12P2	[M-H]-	Uridine 5'-diphosphate	尿苷 5'-二磷酸	Nucleotides and derivatives	核苷酸及其衍生物	Nucleotides and derivatives	核苷酸及其衍生物	27821-45-0	3	-	-	-	119297	144443	127680	38307.1	59081.9	63750.7	139940	138784	118429	108499	92050.4	90211.6	C00015	ko00240,ko00908,ko01100,ko01232,ko01240	C00015	-
Zmfn000481	UPLC-MS/MS	535.04	323.03	-	-	536.044	C14H22N2O16P2	[M-H]-	Uridine-5'-Diphosphate-D-Xylose	尿苷-5'-二磷酸-D-木糖	Nucleotides and derivatives	核苷酸及其衍生物	Nucleotides and derivatives	核苷酸及其衍生物	3616-06-6	3	-	-	-	1.63488e+06	1.28784e+06	1.61768e+06	1.37973e+06	1.21308e+06	1.49263e+06	890652	1.10857e+06	1.21639e+06	1.14703e+06	1.09635e+06	1.16432e+06	C00190	ko00520,ko00908,ko01100,ko01250	C00190	-
mws0976	UPLC-MS/MS	243.06	153.03	-	-	244.07	C9H12N2O6	[M-H]-	β-Pseudouridine	β-假尿苷	Nucleotides and derivatives	核苷酸及其衍生物	Nucleotides and derivatives	核苷酸及其衍生物	1445-07-4	3	-	-	-	63987.9	97632.1	134999	68103.3	66218.8	85937.3	81784.9	137905	151961	67548.5	105905	70461.6	C02067	ko00240,ko01100	C02067	-
Hmhp002834	UPLC-MS/MS	419.1	287.06	-	-	419.097	C20H19O10+	[M]+	Cyanidin 3-xyloside	矢车菊素-3-木糖苷	Flavonoids	黄酮	Anthocyanidins	花青素	29761-24-8	3	-	-	-	10670.6	10670.6	10670.6	10670.6	10670.6	10670.6	98030.1	109188	98367.2	59183.4	53352.8	61998.2	-	-	-	-
Zmbp003860	UPLC-MS/MS	475.13	271.07	-	-	475.123	C23H23O11+	[M]+	Pelargonidin-3-O-(6''-O-acetyl)glucoside	天竺葵素 3-O-(6''-O-乙酰)葡萄糖苷	Flavonoids	黄酮	Anthocyanidins	花青素	-	3	-	-	-	204972	206027	227194	121509	166911	146862	14379.2	2875.85	2875.85	105662	69738.5	87709.4	-	-	-	-
Zbcp003640	UPLC-MS/MS	477.14	315.09	-	-	477.139	C23H25O11+	[M]+	Rosinidin-3-O-glucoside	松香色素-3-O-葡萄糖苷	Flavonoids	黄酮	Anthocyanidins	花青素	-	3	-	-	-	1.94429e+06	2.43612e+06	2.46754e+06	5.04872e+06	4.76356e+06	4.40228e+06	912858	881569	780848	1.82452e+06	1.80593e+06	1.63156e+06	-	-	-	-
HJAP026	UPLC-MS/MS	625.18	463.13	-	-	624.169	C28H32O16	[M+H]+	Chrysoeriol-6-C-glucoside-4'-O-glucoside	金圣草黄素-6-C-葡萄糖苷-4'-O-葡萄糖苷	Flavonoids	黄酮	Flavones	黄酮	-	3	-	-	-	5477.76	5477.76	40160.7	27388.8	121439	81529.6	264647	165401	185440	87657.7	129250	208817	-	-	-	-
mws0047	UPLC-MS/MS	579.17	271.06	-	-	578.164	C27H30O14	[M+H]+	Apigenin-7-O-neohesperidoside (Rhoifolin)	芹菜素-7-O-新橙皮糖苷 (野漆树苷)	Flavonoids	黄酮	Flavones	黄酮	17306-46-6	3	-	-	-	234630	236054	202961	501797	484837	479302	3.97661e+06	2.66124e+06	3.60691e+06	1.56272e+06	1.74065e+06	1.73936e+06	C12627	ko00944	C12627	MetMap103
MWSHY0095	UPLC-MS/MS	331.08	271.06	-	-	330.074	C17H14O7	[M+H]+	Tricin (5,7,4'-Trihydroxy-3',5'-dimethoxyflavone)	苜蓿素(麦黄酮)	Flavonoids	黄酮	Flavones	黄酮	520-32-1	2	-	-	-	6867.19	6867.19	6867.19	61645.2	34336	55407.4	1.76286e+06	1.71488e+06	1.89639e+06	824593	832608	834838	C10193	-	C10193	-
Lmjp006533	UPLC-MS/MS	345.1	330.07	-	-	344.09	C18H16O7	[M+H]+	4',5-Dihydroxy-3,3',7-Trimethoxyflavone; Pachypodol*	4',5-二羟基-3,3',7-三甲氧基黄酮; 藿香黄酮醇*	Flavonoids	黄酮	Flavones	黄酮	33708-72-4	1	-	-	-	19186.3	28728.6	17404.3	550492	568554	630767	3.50007e+06	3.26461e+06	3.01514e+06	1.53158e+06	1.75235e+06	1.86233e+06	C10117	-	C10117	-
mws0058	UPLC-MS/MS	299.06	284.03	-	-	300.063	C16H12O6	[M-H]-	Diosmetin (5,7,3'-Trihydroxy-4'-methoxyflavone)*	香叶木素*	Flavonoids	黄酮	Flavones	黄酮	520-34-3	3	-	-	-	170712	175302	149420	432407	451511	506837	2.75658e+06	2.90944e+06	2.52277e+06	1.93579e+06	1.88041e+06	1.87091e+06	C10038	-	C10038	MetMap105
mws0052	UPLC-MS/MS	447.09	271.06	-	-	446.085	C21H18O11	[M+H]+	Baicalin*	黄芩苷*	Flavonoids	黄酮	Flavones	黄酮	21967-41-9	1	-	-	-	839242	528827	558425	7.30718e+06	9.70791e+06	9.82399e+06	2.30005e+08	2.3946e+08	1.575e+08	1.60084e+08	1.54616e+08	1.39447e+08	C10025	-	C10025	MetMap110
MWSHY0189	UPLC-MS/MS	433.11	271.07	-	-	432.106	C21H20O10	[M+H]+	Apigenin-7-O-glucoside(Cosmosiin)*	芹菜素-7-O-葡萄糖苷*	Flavonoids	黄酮	Flavones	黄酮	578-74-5	1	-	-	-	101516	156168	59229.1	1.77128e+06	1.81659e+06	2.0065e+06	5.89365e+07	5.62937e+07	5.1645e+07	3.27054e+07	3.34131e+07	4.23089e+07	C04608	ko00944	C04608	MetMap103
mws1434	UPLC-MS/MS	431.1	311.05	-	-	432.106	C21H20O10	[M-H]-	Apigenin-6-C-glucoside (Isovitexin)	芹菜素-6-C-葡萄糖苷 (异牡荆素)	Flavonoids	黄酮	Flavones	黄酮	38953-85-4	3	-	-	-	36255.2	108111	27328.1	2.12309e+06	2.28299e+06	2.71757e+06	3.9509e+06	4.02448e+06	3.95407e+06	2.97249e+06	2.17328e+06	2.21646e+06	C01714	ko00944	C01714	MetMap104
mws0051	UPLC-MS/MS	285.08	242.05	-	-	284.068	C16H12O5	[M+H]+	Acacetin*	金合欢素*	Flavonoids	黄酮	Flavones	黄酮	480-44-4	1	-	-	-	61031.6	41960.4	36565.1	174823	173427	194161	3.0024e+07	3.0095e+07	3.03546e+07	1.09506e+07	1.1044e+07	1.22733e+07	C01470	ko00944	C01470	-
Wagp007602	UPLC-MS/MS	331.08	316.09	-	-	330.074	C17H14O7	[M+H]+	Demethoxysudachitin*	Demethoxysudachitin*	Flavonoids	黄酮	Flavones	黄酮	4323-80-2	1	-	-	-	21461.8	21461.8	21461.8	107309	150263	157092	3.65827e+06	2.77765e+06	2.93887e+06	1.58957e+06	1.44961e+06	1.40279e+06	-	-	-	-
pmp000004	UPLC-MS/MS	331.08	316.06	-	-	330.074	C17H14O7	[M+H]+	4',5,7-Trihydroxy-3',6-dimethoxyflavone (Jaceosidin)*	4',5,7-三羟基-3',6-二甲氧基黄酮 (棕矢车菊素)*	Flavonoids	黄酮	Flavones	黄酮	18085-97-7	1	-	-	-	2.05931e+06	2.04478e+06	1.91905e+06	1.74922e+06	1.52446e+06	1.5264e+06	3.23903e+06	2.91653e+06	3.11771e+06	2.18666e+06	2.66429e+06	2.20952e+06	-	-	-	-
Zmap009745	UPLC-MS/MS	345.1	330.07	-	-	344.09	C18H16O7	[M+H]+	Ayanin (3',5-Dihydroxy-3,4',7-Trimethoxyflavone)*	阿亚黄素 (3',5-二羟基-3,4',7-三甲氧基黄酮)*	Flavonoids	黄酮	Flavones	黄酮	572-32-7	1	-	-	-	20375.2	26335.1	16934.7	501605	594556	554675	3.09364e+06	3.10565e+06	2.7181e+06	1.58e+06	1.68466e+06	1.75185e+06	C04444	ko00944,ko01110	C04444	-
MWSHY0121	UPLC-MS/MS	463.09	287.06	-	-	462.08	C21H18O12	[M+H]+	Luteolin-7-O-glucuronide*	木犀草素-7-O-葡萄糖醛酸苷*	Flavonoids	黄酮	Flavones	黄酮	29741-10-4	1	-	-	-	1.69075e+06	1.40701e+06	1.5749e+06	1.5058e+07	1.62425e+07	1.54254e+07	9.98911e+07	1.28976e+08	1.18789e+08	9.00446e+07	8.94888e+07	9.42447e+07	C03515	ko00944	C03515	MetMap105
MWSHY0021	UPLC-MS/MS	299.09	256.07	-	-	298.084	C17H14O5	[M+H]+	Apigenin-7,4'-dimethyl ether	芹菜素-7,4'-二甲醚	Flavonoids	黄酮	Flavones	黄酮	5128-44-9	1	-	-	-	11815	11815	11815	61849.1	59074.9	66734	1.09892e+06	1.09632e+06	1.0062e+06	465772	451253	438431	C10019	-	C10019	MetMap104
MWSHY0104	UPLC-MS/MS	449.11	287.06	-	-	448.101	C21H20O11	[M+H]+	Luteolin-7-O-glucoside (Cynaroside)*	木犀草素-7-O-葡萄糖苷 (木犀草苷)*	Flavonoids	黄酮	Flavones	黄酮	5373-11-5	1	-	-	-	150440	108175	105738	2.95825e+06	3.85322e+06	3.1463e+06	4.20717e+07	3.71794e+07	4.50376e+07	3.51919e+07	3.15217e+07	2.58734e+07	C03951	ko00944	C03951	MetMap105
Sasn005450	UPLC-MS/MS	747.2	373.1	-	-	748.2	C38H36O16	[M-H]-	Cleroden E	Cleroden E	Phenolic acids	酚酸类	Phenolic acids	酚酸类	-	2	-	-	-	7.16835e+06	5.98859e+06	4.18848e+06	9.92812e+06	4.2586e+06	4.79102e+06	4.48604e+07	4.63842e+07	4.24181e+07	1.45881e+07	1.51072e+07	1.33635e+07	-	-	-	-
pmb0608	UPLC-MS/MS	549.12	301.07	-	-	548.117	C25H24O14	[M+H]+	Chrysoeriol-7-O-(6''-malonyl)glucoside	金圣草黄素-7-O-(6''-丙二酰)葡萄糖苷	Flavonoids	黄酮	Flavones	黄酮	-	1	-	-	-	50686.1	64064.8	46408.4	318665	420014	438015	9.98487e+06	9.43535e+06	9.53999e+06	3.82587e+06	3.81007e+06	4.06869e+06	-	-	-	-
Lmsp008392	UPLC-MS/MS	315.09	272.07	-	-	314.079	C17H14O6	[M+H]+	4',5-Dihydroxy-3',5'-dimethoxyflavone	4',5-二羟基-3',5'-二甲氧基黄酮	Flavonoids	黄酮	Flavones	黄酮	-	1	-	-	-	51227.1	52092.2	30296.1	270507	336945	378332	27008400	2.69274e+07	2.53551e+07	5.60954e+06	5.0294e+06	5.14643e+06	-	-	-	-
Ladp005021	UPLC-MS/MS	563.14	315.09	-	-	562.132	C26H26O14	[M+H]+	Kumatakenin malonyl glucoside	华良姜素 丙二酰葡萄糖苷	Flavonoids	黄酮	Flavones	黄酮	-	1	-	-	-	175939	175939	175939	879694	1.18948e+06	1.11998e+06	4.10512e+07	4.06092e+07	3.72362e+07	15500299	1.52915e+07	1.62206e+07	-	-	-	-
pmp000587	UPLC-MS/MS	535.11	287.05	-	-	534.101	C24H22O14	[M+H]+	Luteolin-7-O-(6''-malonyl)glucoside*	木犀草素-7-O-(6''-丙二酰)葡萄糖苷*	Flavonoids	黄酮	Flavones	黄酮	-	1	-	-	-	234154	165847	189983	1.03879e+06	1.20097e+06	1.49063e+06	5.53355e+06	5.07785e+06	6.02984e+06	2.60188e+06	2.30146e+06	3.03559e+06	C10103	-	C10103	MetMap105
Zbsp004714	UPLC-MS/MS	565.16	271.06	-	-	564.148	C26H28O14	[M+H]+	Apigenin-7-O-(2''-glucosyl)arabinoside	芹菜素-7-O-(2''-葡萄糖基)阿拉伯糖苷	Flavonoids	黄酮	Flavones	黄酮	-	1	-	-	-	86513.2	84235.7	77418.1	8.56846e+06	9.59949e+06	7.28901e+06	5.40026e+07	58407550	5.67919e+07	6.67331e+07	5.69676e+07	6.32424e+07	-	-	CM00672	MetMap104
pmp000344	UPLC-MS/MS	271.06	243.06	-	-	270.053	C15H10O5	[M+H]+	3',4',7-Trihydroxyflavone	3',4',7-三羟基黄酮	Flavonoids	黄酮	Flavones	黄酮	2150-11-0	1	-	-	-	37442.2	37442.2	37442.2	37442.2	37442.2	37442.2	418042	401917	476516	235936	187211	221154	-	-	-	-
MWSHY0031	UPLC-MS/MS	447.09	271.06	-	-	446.085	C21H18O11	[M+H]+	Apigenin-7-O-glucuronide*	芹菜素-7-O-葡萄糖醛酸苷*	Flavonoids	黄酮	Flavones	黄酮	29741-09-1	1	-	-	-	652632	687673	470072	7.56373e+06	8.94818e+06	9.12176e+06	2.25226e+08	2.3192e+08	1.72231e+08	1.60687e+08	1.58988e+08	1.58229e+08	-	-	CM00663	MetMap103
Zmjp010694	UPLC-MS/MS	359.11	344.09	-	-	358.105	C19H18O7	[M+H]+	5-Hydroxy-3,7,3',4'-tetramethoxyflavone (Retusin)	5-羟基-3,7,3',4'-四甲氧基黄酮	Flavonoids	黄酮	Flavones	黄酮	1245-15-4	1	-	-	-	47582.2	47582.2	47582.2	237911	261393	271739	1.11751e+06	1.11701e+06	1.09945e+06	491722	598097	621810	-	-	-	-
pmp000003	UPLC-MS/MS	317.07	302.04	-	-	316.058	C16H12O7	[M+H]+	Nepetin (5,7,3',4'-Tetrahydroxy-6-methoxyflavone)	泽兰黄酮 (6-甲氧基木犀草素)	Flavonoids	黄酮	Flavones	黄酮	520-11-6	1	-	-	-	6.58805e+06	6.46282e+06	6.45639e+06	2.15769e+06	2.15258e+06	2.31962e+06	3.11264e+06	3.02129e+06	2.9435e+06	3.94246e+06	3.86652e+06	3.85481e+06	-	-	CM00157	MetMap105
MWSHC20110	UPLC-MS/MS	301.07	286.05	-	-	300.063	C16H12O6	[M+H]+	8-Methoxyapigenin*	8-甲氧基芹菜素*	Flavonoids	黄酮	Flavones	黄酮	57096-02-3	1	-	-	-	59279.7	90905.5	47298.2	419919	515821	613903	5.04646e+06	4.37663e+06	4.97196e+06	2.57361e+06	2.35538e+06	2.57759e+06	-	-	CM00664	MetMap104
Lmqp003887	UPLC-MS/MS	581.15	287.05	-	-	580.143	C26H28O15	[M+H]+	Kaempferol-3-O-xylosyl(1→2)glucoside	山柰酚-3-O-木糖基(1→2)葡萄糖苷	Flavonoids	黄酮	Flavones	黄酮	-	1	-	-	-	30185.5	19281.6	33810.3	1.52831e+06	1.53433e+06	1.54659e+06	3.47468e+07	3.42218e+07	3.701e+07	1.61145e+07	1.52906e+07	1.55631e+07	-	-	CM00484	MetMap113
Hmhp005160	UPLC-MS/MS	331.07	316.05	-	-	330.074	C17H14O7	[M+H]+	2',5,5'-Trihydroxy-7,8-dimethoxyflavone; Rehderianin I*	2',5,5'-三羟基-7,8-二甲氧基黄酮; 甘肃黄芩素 I*	Flavonoids	黄酮	Flavones	黄酮	90965-30-3	1	-	-	-	2.09882e+06	2.20763e+06	2.04793e+06	1.59641e+06	1.6656e+06	1.87861e+06	2.66469e+06	2.74243e+06	2.40795e+06	2.1565e+06	2.09233e+06	2.20372e+06	-	-	-	-
mws1316	UPLC-MS/MS	301.07	258.05	-	-	300.063	C16H12O6	[M+H]+	Hydroxygenkwanin	羟基芫花素	Flavonoids	黄酮	Flavones	黄酮	20243-59-8	1	-	-	-	180039	173500	149680	143631	143180	161642	2.16105e+07	2.30346e+07	2.28133e+07	8.69631e+06	8.75782e+06	8.44337e+06	-	-	CM00890	MetMap110
Lmdp006732	UPLC-MS/MS	301.07	258.05	-	-	300.063	C16H12O6	[M+H]+	Scutellarein-4'-methyl ether (5,6,7-Trihydroxy-4'-methoxyflavone)	野黄芩素-4'-甲醚; 5,6,7-三羟基-4'-甲氧基黄酮	Flavonoids	黄酮	Flavones	黄酮	6563-66-2	1	-	-	-	17517.3	17517.3	17517.3	87586.6	91289	113353	1.13439e+06	1.08918e+06	1.10428e+06	564782	513022	583206	-	-	CM00892	MetMap110
pmp000161	UPLC-MS/MS	315.09	271.06	-	-	314.079	C17H14O6	[M+H]+	5,2'-Dihydroxy-7,8-dimethoxyflavone	5,2'-二羟基-7,8-二甲氧基黄酮	Flavonoids	黄酮	Flavones	黄酮	41060-16-6	1	-	-	-	7124.54	19429.1	14194.5	621040	679380	732739	1.05561e+07	1.05894e+07	9.81855e+06	4.75919e+06	4.90687e+06	4.78319e+06	-	-	-	-
Zmjp004795	UPLC-MS/MS	301.07	286.05	-	-	300.063	C16H12O6	[M+H]+	5,6,7-Tetrahydroxy-8-methoxyflavone*	5,6,7-三羟基-8-甲氧基黄酮*	Flavonoids	黄酮	Flavones	黄酮	-	1	-	-	-	67746.2	49696.8	53834.4	277984	292219	308900	2.62859e+06	2.36208e+06	1.97787e+06	1.10478e+06	1.22368e+06	1.12474e+06	-	-	CM00893	MetMap110
Zajp002650	UPLC-MS/MS	595.16	577.16	-	-	594.159	C27H30O15	[M+H]+	Vitexin-7-O-glucoside	牡荆素-7-O-葡萄糖苷	Flavonoids	黄酮	Flavones	黄酮	-	1	-	-	-	111497	111497	111497	591298	557485	686669	1.09021e+07	9.81335e+06	1.16942e+07	4.09594e+06	3.74298e+06	4.45832e+06	-	-	CM00093	MetMap103,MetMap104
pmp000013	UPLC-MS/MS	507.15	345.09	-	-	506.142	C24H26O12	[M+H]+	Eupatilin-7-O-glucoside	异泽兰黄素-7-O-葡萄糖苷	Flavonoids	黄酮	Flavones	黄酮	-	2	-	-	-	98549.8	93698	95354.3	1.24512e+06	1.13281e+06	1.36858e+06	1.04805e+07	1.18967e+07	1.01309e+07	5.42443e+06	4.46023e+06	4.72355e+06	-	-	-	-
pmp000172	UPLC-MS/MS	477.14	315.08	-	-	476.132	C23H24O11	[M+H]+	5,2'-Dihydroxy-7,8-dimethoxyflavone glycoside*	5,2'-二羟基-7,8-二甲氧基黄酮葡萄糖苷*	Flavonoids	黄酮	Flavones	黄酮	-	2	-	-	-	115065	146295	93944	434511	389089	383154	6.16875e+06	6.81533e+06	5.38388e+06	2.31439e+06	2.23447e+06	2.20027e+06	-	-	-	-
Lmpp003930	UPLC-MS/MS	579.15	271.06	-	-	578.142	C30H26O12	[M+H]+	Apigenin-7-O-(6''-p-Coumaryl)glucoside	芹菜素-7-O-(6''-对香豆酰)葡萄糖苷	Flavonoids	黄酮	Flavones	黄酮	-	2	-	-	-	255908	265832	167667	478641	487267	497026	4.08865e+06	4.23203e+06	3.22104e+06	1.72139e+06	1.74624e+06	1.81139e+06	-	-	CM00669	MetMap103
Wahp006462	UPLC-MS/MS	507.15	345.1	-	-	506.142	C24H26O12	[M+H]+	Rhamnazine-5-O-β-D-glucoside	鼠李秦素-5-O-β-D-葡萄糖苷	Flavonoids	黄酮	Flavones	黄酮	-	2	-	-	-	41529.7	52464.2	44339.5	2.76795e+06	2.91835e+06	3.38069e+06	6.19642e+06	5.95939e+06	6.32087e+06	3.59697e+06	3.35927e+06	3.0512e+06	-	-	-	-
Lajp006634	UPLC-MS/MS	593.15	345.1	-	-	592.143	C27H28O15	[M+H]+	3',5'-dihydroxy-5,7,4'-trimethoxyflavone malonyl glucoside	3',5'-二羟基-5,7,4'-三甲氧基黄酮丙二酰葡萄糖苷	Flavonoids	黄酮	Flavones	黄酮	-	2	-	-	-	305163	319734	356878	2.44192e+06	2.79453e+06	2.89271e+06	6.24416e+06	6.79322e+06	6.5904e+06	3.33696e+06	3.13909e+06	3.2255e+06	-	-	-	-
Lahp003268	UPLC-MS/MS	757.22	577.15	-	-	756.211	C33H40O20	[M+H]+	Vicenin-2,6''-O-Glucoside	维采宁-2,6''-氧-葡萄糖苷	Flavonoids	黄酮	Flavones	黄酮	-	2	-	-	-	37249.9	37249.9	37249.9	436191	413036	344220	225601	219395	272079	210246	207132	186249	-	-	-	-
pmp000577	UPLC-MS/MS	461.12	285.08	-	-	460.116	C26H20O8	[M+H]+	Acacetin-7-O-glucuronide	金合欢素-7-O-葡萄糖醛酸苷	Flavonoids	黄酮	Flavones	黄酮	-	2	-	-	-	57329.1	58860.4	25282.6	1.117e+06	1.08574e+06	1.18558e+06	9.6115e+07	9.42551e+07	9.67648e+07	5.33087e+07	5.22854e+07	5.01347e+07	-	-	-	-
Wahp006113	UPLC-MS/MS	507.15	345.1	-	-	506.142	C24H26O12	[M+H]+	Rhamnazine-4'-O-β-D-glucoside	鼠李秦素-4'-O-β-D-葡萄糖苷	Flavonoids	黄酮	Flavones	黄酮	-	2	-	-	-	32518.2	31289.6	44664.3	3.01e+06	3.08461e+06	3.41043e+06	5.0772e+06	3.92808e+06	7.13442e+06	3.61768e+06	3.07803e+06	3.51847e+06	-	-	-	-
Lazp003122	UPLC-MS/MS	595.17	301.07	-	-	594.159	C27H30O15	[M+H]+	Chrysoeriol xylosyl glucoside*	金圣草黄素木糖基葡萄糖苷*	Flavonoids	黄酮	Flavones	黄酮	-	2	-	-	-	32194.7	32194.7	32194.7	160973	164958	188917	1.62534e+06	1.48883e+06	1.51992e+06	685210	581260	616493	-	-	-	-
Laxp004783	UPLC-MS/MS	477.14	315.09	-	-	476.132	C23H24O11	[M+H]+	Abrusin	相思子素	Flavonoids	黄酮	Flavones	黄酮	-	2	-	-	-	53459.6	32428.2	42463.4	392799	357626	443614	5.6333e+06	6.84097e+06	6.20955e+06	2.33572e+06	2.33529e+06	2.49267e+06	-	-	-	-
Wbsp000172	UPLC-MS/MS	579.15	271.06	-	-	578.142	C30H26O12	[M+H]+	Apigenin-4'-O-(2''-O-p-coumaroyl)-β-D-glucopyranoside	芹菜素-4'-O-(2''-O-对香豆酰基)-β-D-葡萄糖苷	Flavonoids	黄酮	Flavones	黄酮	-	2	-	-	-	155789	155789	155789	1.43198e+06	817486	778943	1.83546e+07	1.52115e+07	1.5664e+07	6.86671e+06	7.66857e+06	6.59046e+06	-	-	CM00670	MetMap103
Lmmp006598	UPLC-MS/MS	623.14	271.06	-	-	622.132	C31H26O14	[M+H]+	Apigenin-7-O-(2''-feruloyl)glucuronide	芹菜素-7-O-(2''-阿魏酰)葡萄糖醛酸苷	Flavonoids	黄酮	Flavones	黄酮	-	2	-	-	-	15316.2	15316.2	15316.2	77386.6	77187.2	76581	1.50494e+06	1.46975e+06	1.43476e+06	787570	873369	680762	-	-	CM00102	MetMap103
Wbsp000219	UPLC-MS/MS	725.19	725.19	-	-	724.179	C39H32O14	[M+H]+	Apigenin-4'-O-(2'',6''-di-O-p-coumaroyl)glucoside	芹菜素-4'-O-(2'',6''-二-O-对香豆酰基)葡萄糖苷	Flavonoids	黄酮	Flavones	黄酮	-	2	-	-	-	77718.6	77718.6	77718.6	388593	401063	439724	1.01053e+07	1.02913e+07	1.15169e+07	7.9153e+06	6.79849e+06	6.65939e+06	-	-	CM00110	MetMap103
Lmmp007016	UPLC-MS/MS	623.14	271.06	-	-	622.132	C31H26O14	[M+H]+	Apigenin-7-O-(6''-feruloyl)glucuronide	芹菜素-7-O-(6''-阿魏酰)葡萄糖醛酸苷	Flavonoids	黄酮	Flavones	黄酮	-	2	-	-	-	12232.8	12232.8	12232.8	61163.9	96930	89141.4	1.50141e+06	1.62054e+06	1.44718e+06	786956	897577	871589	-	-	CM00103	MetMap103
Lmnp003080	UPLC-MS/MS	565.16	433.11	-	-	564.148	C26H28O14	[M+H]+	Hispidulin-8-C-(2''-O-xylosyl)xyloside	高车前素-8-C-(2''-O-木糖基)木糖苷	Flavonoids	黄酮	Flavones	黄酮	-	2	-	-	-	25501	21637.7	25052.4	2.12743e+06	1.96933e+06	2.52593e+06	4.76667e+07	3.52199e+07	4.09326e+07	2.77804e+07	2.63376e+07	2.46219e+07	-	-	CM00913	MetMap110
Smhp004476	UPLC-MS/MS	565.15	433.11	-	-	564.148	C26H28O14	[M+H]+	Isovitexin-2''-O-xyloside	异牡荆素-2''-O-木糖苷	Flavonoids	黄酮	Flavones	黄酮	-	2	-	-	-	35931.4	21634.3	35300.9	2.00597e+06	1.98302e+06	1.94579e+06	4.58839e+07	4.2719e+07	5.218e+07	3.35208e+07	2.6306e+07	2.55907e+07	-	-	-	-
Wbsp000187	UPLC-MS/MS	579.15	147.04	-	-	578.142	C30H26O12	[M+H]+	Apigenin-4'-O-(6''-O-p-coumaroyl)-β-D-glucopyranoside	芹菜素-4'-O-(6''-O-对香豆酰基)-β-D-葡萄糖苷	Flavonoids	黄酮	Flavones	黄酮	-	2	-	-	-	41041.9	41041.9	41041.9	205209	229643	236952	4.5347e+06	4.49054e+06	4.27114e+06	1.99701e+06	1.98972e+06	1.94089e+06	-	-	CM00671	MetMap103
Lmmp006479	UPLC-MS/MS	653.15	271.06	-	-	652.143	C32H28O15	[M+H]+	Apigenin-7-O-(2''-Sinapoyl)glucuronide	芹菜素-7-O-(2''-芥子酰)葡萄糖醛酸苷	Flavonoids	黄酮	Flavones	黄酮	-	2	-	-	-	14265.6	14265.6	14265.6	14265.6	14265.6	14265.6	114469	108381	88301.4	74905.9	93781.7	71327.8	-	-	CM00104	MetMap103
Laxp003363	UPLC-MS/MS	593.19	327.09	-	-	592.179	C28H32O14	[M+H]+	Swertisin 2''-O-Rhamnoside	当药黄素-2''-氧-鼠李糖苷	Flavonoids	黄酮	Flavones	黄酮	-	2	-	-	-	154167	167307	212473	9175.61	9175.61	9175.61	9175.61	9175.61	9175.61	48303	61580	45878.1	-	-	-	-
Lahp004570	UPLC-MS/MS	549.16	255.07	-	-	548.153	C26H28O13	[M+H]+	Chrysin apiosyl glucoside	白杨素芹糖基葡萄糖苷	Flavonoids	黄酮	Flavones	黄酮	-	2	-	-	-	10149.5	10149.5	10149.5	97025.2	79879.3	117086	103996	100085	112553	68247.6	65402.7	50747.7	-	-	-	-
Zacp004312	UPLC-MS/MS	755.24	285.08	-	-	754.232	C34H42O19	[M+H]+	Acacetin-7-O-β-D-glucopyranoside-(1→2)[a-L-rhamnopyranosyl-(1→6)]-β-D-glucopyranoside	刺槐素-7-O-β-D-葡糖醛酸糖苷-(1→2)[α-L-鼠李糖糖基-(1→6)]-β-D-葡糖苷	Flavonoids	黄酮	Flavones	黄酮	-	2	-	-	-	50069.3	67833.2	52621.5	55159.9	40698.2	40698.2	797652	868930	1.12394e+06	317371	225724	239023	-	-	-	-
Zmxp005470	UPLC-MS/MS	579.13	331.08	-	-	578.127	C26H26O15	[M+H]+	Tricin-7-O-(6''-O-malonyl)glucoside	苜蓿素-7-O-(6''-O-丙二酰)葡萄糖苷	Flavonoids	黄酮	Flavones	黄酮	-	2	-	-	-	67100.4	84701.1	127552	173812	178660	170364	1.20593e+06	998843	1.5231e+06	603379	525627	684143	-	-	-	-
Smlp011494	UPLC-MS/MS	595.15	595.15	-	-	594.153	C34H26O10	[M+H]+	Amentoflavone-4',4''',7,7''-tetramethyl ether	穗花杉双黄酮-4',4''',7,7''-四甲酯	Flavonoids	黄酮	Flavones	黄酮	-	2	-	-	-	1.99569e+06	2.01462e+06	2.21458e+06	35552.3	35552.3	35552.3	177762	266269	234251	603379	765306	715833	-	-	-	-
Zbsp004894	UPLC-MS/MS	565.12	317.07	-	-	564.111	C25H24O15	[M+H]+	3'-O-Methyltricetin-7-O-(6''-malonyl)glucoside*	3'-O-甲基五羟黄酮-7-O-(6''-丙二酰)葡萄糖苷*	Flavonoids	黄酮	Flavones	黄酮	-	2	-	-	-	207726	206623	166009	619168	586780	695367	914895	919946	802522	392970	502516	519561	-	-	-	-
Hmzp004605	UPLC-MS/MS	463.13	301.08	-	-	462.116	C22H22O11	[M+H]+	Ladanetin-6-O-β-D-glucoside	鼬瓣花亭-6-O-β-D-葡萄糖苷	Flavonoids	黄酮	Flavones	黄酮	-	2	-	-	-	179319	129214	153604	810833	1.36071e+06	1.05938e+06	2.66292e+06	2.24435e+06	2.68423e+06	1.94075e+06	1.26382e+06	1.52795e+06	-	-	CM00894	MetMap110
Lmtp003948	UPLC-MS/MS	481.13	319.05	-	-	480.127	C22H24O12	[M+H]+	3',5',5,7-Tetrahydroxy-4'-methoxyflavanone-3'-O-glucoside	3',5',5,7-四羟基-4'-甲氧基黄烷酮-3'-O-葡萄糖苷	Flavonoids	黄酮	Flavones	黄酮	-	3	-	-	-	166598	29241.9	82876.8	2699.03	32587.2	64868.4	194036	291669	173099	93949.6	90250.1	121140	-	-	-	-
Zmhp002964	UPLC-MS/MS	491.12	315.1	-	-	490.111	C23H22O12	[M+H]+	5,7-Dihydroxy-6,8-dimethoxyflavone-7-O-glucoside	5,7-二羟基-6,8-二甲氧基黄酮-7-O-葡萄糖醛酸苷	Flavonoids	黄酮	Flavones	黄酮	-	3	-	-	-	9648.32	9648.32	9648.32	9648.32	9648.32	9648.32	109362	108710	116406	68177.9	48241.6	73348.7	-	-	-	-
Zmhp003514	UPLC-MS/MS	301.07	286.05	-	-	300.063	C16H12O6	[M+H]+	6,7,8-Tetrahydroxy-5-methoxyflavone*	6,7,8-三羟基-5-甲氧基黄酮*	Flavonoids	黄酮	Flavones	黄酮	-	1	-	-	-	238351	226220	229953	99299	103466	125494	725721	619696	526084	341139	373022	238993	-	-	-	-
pmp000110	UPLC-MS/MS	359.11	344.09	-	-	358.105	C19H18O7	[M+H]+	7-Hydroxy-3,5,6,8-tetramethoxyflavone	7-羟基-3,5,6,8-四甲氧基黄酮	Flavonoids	黄酮	Flavones	黄酮	-	3	-	-	-	7823.28	7823.28	7823.28	59430.6	87924.7	64860.8	64862.6	119194	65494.4	63534.2	39116.4	49896.6	-	-	-	-
Lmtp002942	UPLC-MS/MS	535.14	499.12	-	-	534.137	C25H26O13	[M+H]+	Apigenin-6,8-di-C-arabinoside*	芹菜素-6,8-二-C-阿拉伯糖苷*	Flavonoids	黄酮	Flavones	黄酮	-	3	-	-	-	33228.9	13688.2	50434	484243	503013	574616	2.01455e+06	1.8201e+06	2.07147e+06	1.22354e+06	1.24858e+06	1.06859e+06	-	-	CM00084	MetMap104
Lmtp002474	UPLC-MS/MS	565.16	427.1	-	-	564.148	C26H28O14	[M+H]+	Apigenin-6-C-(2''-glucosyl)arabinoside	芹菜素-6-C-(2''-葡萄糖基)阿拉伯糖苷	Flavonoids	黄酮	Flavones	黄酮	-	3	-	-	-	17080.2	14803.1	13666.2	87650.2	83083.1	96724.9	102415	86484.4	64876.2	69416.9	51216.8	68290.2	-	-	CM00083	MetMap104
pmp000237	UPLC-MS/MS	579.13	283.06	-	-	578.127	C26H26O15	[M+H]+	Apigenin-6-C-(2''-glucuronyl)xyloside	芹菜素-6-C-(2''-葡萄糖醛酸基)木糖苷	Flavonoids	黄酮	Flavones	黄酮	-	3	-	-	-	877605	1.06344e+06	568223	32750.7	32750.7	32750.7	32750.7	32750.7	32750.7	163754	216731	219136	-	-	-	-
Lmyp004963	UPLC-MS/MS	579.17	415.11	-	-	578.164	C27H30O14	[M+H]+	Apigenin-6-C-(2''-rhamnosyl)glucoside	芹菜素-6-C-(2''-鼠李糖基)葡萄糖苷	Flavonoids	黄酮	Flavones	黄酮	-	3	-	-	-	120368	125493	102307	13503.6	12627.3	24619.9	2525.47	2525.47	2525.47	30783.3	43260.8	34069.7	-	-	-	-
Lmtp002822	UPLC-MS/MS	535.14	499.12	-	-	534.137	C25H26O13	[M+H]+	Apigenin-6-C-arabinoside-8-C-xyloside*	芹菜素-6-C-阿拉伯糖苷-8-C-木糖苷*	Flavonoids	黄酮	Flavones	黄酮	-	3	-	-	-	65442.6	83291.5	20391.4	501619	507413	536424	1.73652e+06	1.89657e+06	1.73799e+06	1.10517e+06	952656	1.06404e+06	-	-	CM00086	MetMap104
pmb0626	UPLC-MS/MS	757.22	433.4	-	-	756.211	C33H40O20	[M+H]+	Apigenin-6-C-glucoside-7-O-Sophoroside	芹菜素-6-C-葡萄糖苷-7-O-槐糖苷	Flavonoids	黄酮	Flavones	黄酮	-	3	-	-	-	5075.89	5075.89	5075.89	5075.89	5075.89	5075.89	81483.7	80253.2	82401	33259.9	25379.5	57061.9	-	-	CM00122	MetMap104
Lmtp002642	UPLC-MS/MS	565.16	457.11	-	-	564.148	C26H28O14	[M+H]+	Apigenin-8-C-(2''-glucosyl)arabinoside	芹菜素-8-C-(2''-葡萄糖基)阿拉伯糖苷	Flavonoids	黄酮	Flavones	黄酮	-	3	-	-	-	3188.68	3188.68	3188.68	16587.9	16812.2	20491.2	21627.9	22764.6	19642.5	20491.2	24482.9	15943.4	-	-	CM00082	MetMap104
Zbsp003407	UPLC-MS/MS	595.17	427.1	-	-	594.159	C27H30O15	[M+H]+	Apigenin-6,8-di-C-glucoside (Vicenin-2)	芹菜素-6,8-二-C-葡萄糖苷 (新西兰牡荆苷 II)	Flavonoids	黄酮	Flavones	黄酮	23666-13-9	2	-	-	-	50646.5	66666.1	48614.8	1.98346e+07	2.12422e+07	2.07053e+07	1.93162e+07	1.66467e+07	2.1215e+07	1.31055e+07	1.59776e+07	1.31644e+07	C10195	-	C10195	-
pmb0603	UPLC-MS/MS	625.18	301.07	-	-	624.169	C28H32O16	[M+H]+	Chrysoeriol-7,4'-di-O-glucoside	金圣草黄素-7,4'-二-O-葡萄糖苷	Flavonoids	黄酮	Flavones	黄酮	-	3	-	-	-	33049.9	44693.8	47516.1	1.53398e+06	1.64237e+06	1.6186e+06	1.25566e+06	944570	1.46165e+06	1.3958e+06	1.21013e+06	1.18964e+06	-	-	-	-
HJAP056	UPLC-MS/MS	477.14	315.1	-	-	476.132	C23H24O11	[M+H]+	Dihydroxy-dimethoxyflavone-7-O-glucoside*	二羟基二甲氧基黄酮-7-O-葡萄糖苷*	Flavonoids	黄酮	Flavones	黄酮	-	2	-	-	-	100822	58503.6	58242.6	781242	650016	829817	1.22275e+07	1.22077e+07	1.10166e+07	3.41718e+06	4.85099e+06	4.43841e+06	-	-	-	-
pmp000120	UPLC-MS/MS	463.12	427.1	-	-	462.116	C22H22O11	[M+H]+	Diosmetin-6-C-glucoside	香叶木素-6-C-葡萄糖苷	Flavonoids	黄酮	Flavones	黄酮	-	3	-	-	-	37595	38837.5	43850	4261.57	21307.9	4261.57	4261.57	33992.9	4261.57	36484.1	42879.3	30442	-	-	-	-
pmp000579	UPLC-MS/MS	463.12	301.07	-	-	462.116	C22H22O11	[M+H]+	Diosmetin-7-O-galactoside*	香叶木素-7-O-半乳糖苷*	Flavonoids	黄酮	Flavones	黄酮	-	3	-	-	-	152745	129894	140202	749424	1.02064e+06	1.03727e+06	2.3231e+06	2.13533e+06	2.47518e+06	1.61564e+06	1.55712e+06	1.58172e+06	-	-	-	-
Lmnp002741	UPLC-MS/MS	579.17	447.13	-	-	578.164	C27H30O14	[M+H]+	Genkwanin-6-C-(2''-O-apiosyl)glucoside	芫花素-6-C-(2''-O-芹糖基)葡萄糖苷	Flavonoids	黄酮	Flavones	黄酮	-	3	-	-	-	45234	45825.2	29068.1	89037.7	83824.2	107228	792948	580099	563557	229398	288951	284544	-	-	CM00906	MetMap110
Lmnp002584	UPLC-MS/MS	625.18	463.13	-	-	624.169	C28H32O16	[M+H]+	Hispidulin-8-C-(2''-O-glucosyl)glucoside	高车前素-8-C-(2''-O-葡萄糖基)葡萄糖苷	Flavonoids	黄酮	Flavones	黄酮	-	3	-	-	-	5118.19	5118.19	39640.2	33729.6	5118.19	5118.19	85779.6	34109.2	74397.7	40442	25591	36047.2	-	-	CM00916	MetMap110
pmb0634	UPLC-MS/MS	949.26	829.22	-	-	948.254	C43H48O24	[M+H]+	Isoorientin-7-O-(6''-feruloyl)glucoside-O-glucoside	异荭草素-7-O-(6''-阿魏酰)葡萄糖苷-5-O-葡萄糖苷	Flavonoids	黄酮	Flavones	黄酮	-	3	-	-	-	1072.22	1072.22	1072.22	5361.12	6347.51	17967.9	21137.4	31704.5	19029.5	8462.57	10573.5	16729.7	-	-	CM00219	MetMap105
Zmhp003186	UPLC-MS/MS	771.21	147.04	-	-	770.206	C37H38O18	[M+H]+	Isovitexin-2''-O-(6'''-feruloyl)glucoside	异牡荆素-2''-O-(6'''-阿魏酰)葡萄糖苷	Flavonoids	黄酮	Flavones	黄酮	-	3	-	-	-	20531.1	16380.8	14496.9	39838.2	52900.1	13234.1	12126.1	26536	21739.9	31560.9	20531.1	23172.8	-	-	CM00127	MetMap104
pmp000585	UPLC-MS/MS	519.11	271.06	-	-	518.106	C24H22O13	[M+H]+	Apigenin-7-O-(6''-malonyl)glucoside	芹菜素-7-O-(6''-丙二酰)葡萄糖苷	Flavonoids	黄酮	Flavones	黄酮	86546-87-4	2	-	-	-	26224.1	26224.1	26224.1	131121	138817	161281	1.0411e+06	1.08336e+06	1.16499e+06	559397	516081	553313	C10020	-	C10020	MetMap103
Lmyp004081	UPLC-MS/MS	579.17	313.07	-	-	578.164	C27H30O14	[M+H]+	Isovitexin-2''-O-rhamnoside	异牡荆素-2''-O-鼠李糖苷	Flavonoids	黄酮	Flavones	黄酮	-	3	-	-	-	815007	958659	652490	39734.2	39734.2	39734.2	39734.2	39734.2	39734.2	198671	216731	243218	-	-	CM00676	MetMap104
Lmnp002413	UPLC-MS/MS	595.17	449.11	-	-	594.159	C27H30O15	[M+H]+	Luteolin-6-C-glucoside-7-O-rhamnoside	木犀草素-6-C-葡萄糖苷-7-O-鼠李糖苷	Flavonoids	黄酮	Flavones	黄酮	-	3	-	-	-	46669.4	112676	118363	7417.79	7417.79	7417.79	7417.79	7417.79	7417.79	49550.2	37088.9	53357	-	-	CM00177	MetMap105
Hmpp002612	UPLC-MS/MS	611.16	287.05	-	-	610.153	C27H30O16	[M+H]+	Luteolin-7-O-gentiobioside	木犀草素-7-O-龙胆双糖苷	Flavonoids	黄酮	Flavones	黄酮	-	3	-	-	-	63516.7	49662.1	55771.1	72454.6	193815	97804.6	290174	244240	541425	125804	278002	167876	-	-	CM00180	MetMap105
Hmjp003008	UPLC-MS/MS	609.14	287.06	-	-	608.138	C27H28O16	[M+H]+	Luteolin-7-O-glucuronide-5-O-rhamnoside	木犀草素-7-O-葡萄糖醛酸苷-5-O-鼠李糖苷	Flavonoids	黄酮	Flavones	黄酮	-	3	-	-	-	4077.56	4077.56	20387.8	133096	116345	180604	816701	665177	885498	990384	912701	642542	-	-	CM00179	MetMap105
MWSHY0058	UPLC-MS/MS	287.06	153.02	-	-	286.048	C15H10O6	[M+H]+	Luteolin (5,7,3',4'-Tetrahydroxyflavone)*	木犀草素*	Flavonoids	黄酮	Flavones	黄酮	491-70-3	2	-	-	-	7036.72	7036.72	7036.72	7036.72	7036.72	7036.72	95701.4	99983.8	90805.3	75001.8	35183.6	60066	C01514	ko00941,ko00944,ko01100,ko01110	C01514	MetMap105
pmb0716	UPLC-MS/MS	655.19	331.08	-	-	654.18	C29H34O17	[M+H]+	Tricin-4'-O-glucoside-7-O-glucoside	苜蓿素-4'-O-葡萄糖苷-7-O-葡萄糖苷	Flavonoids	黄酮	Flavones	黄酮	-	3	-	-	-	53216.2	53216.2	53216.2	375676	356575	266081	529049	625040	536022	429652	449083	382507	-	-	-	-
Lmmp007120	UPLC-MS/MS	683.16	331.08	-	-	682.153	C33H30O16	[M+H]+	Tricin-7-O-(2''-feruloyl)glucuronide	苜蓿素-7-O-(2''-阿魏酰)葡萄糖醛酸苷	Flavonoids	黄酮	Flavones	黄酮	-	3	-	-	-	63631.2	63631.2	63631.2	63631.2	63631.2	63631.2	829687	692514	849809	318156	387819	410534	-	-	-	-
Zmjp003291	UPLC-MS/MS	595.17	433.12	-	-	594.159	C27H30O15	[M+H]+	Vitexin-2''-O-galactoside	牡荆素-2''-O-半乳糖苷	Flavonoids	黄酮	Flavones	黄酮	-	3	-	-	-	23998.9	23998.9	119995	1.85906e+06	1.83286e+06	1.82666e+06	1.30161e+06	1.46704e+06	1.31431e+06	1.27293e+06	1.26064e+06	990001	-	-	CM00094	MetMap104
Lmsp011263	UPLC-MS/MS	329.1	268.08	-	-	328.095	C18H16O6	[M+H]+	6-Hydroxy-5,7,4'-trimethoxyflavone	6-羟基-5,7,4'-三甲氧基黄酮	Flavonoids	黄酮	Flavones	黄酮	6938-19-8	2	-	-	-	26189.4	26189.4	26189.4	130947	136542	147704	821115	745407	728858	298141	338743	316060	C14985	-	C14985	-
Hmbp002730	UPLC-MS/MS	287.06	153.01	-	-	286.048	C15H10O6	[M+H]+	Isoscutellarein*	异野黄芩素*	Flavonoids	黄酮	Flavones	黄酮	41440-05-5	2	-	-	-	27271	23296.2	13305.6	33471.3	22749.4	30651.6	122976	100598	98165.1	74846.5	63181.9	68645.9	C10097	-	C10097	MetMap104,MetMap110
MWSHY0184	UPLC-MS/MS	461.11	285.08	-	-	460.101	C22H20O11	[M+H]+	Wogonin-7-O-Glucuronide (Wogonoside)	汉黄芩苷 (汉黄芩素-7-O-葡萄糖醛酸苷)	Flavonoids	黄酮	Flavones	黄酮	51059-44-0	2	-	-	-	45997.8	58278.3	39417.1	1.00834e+06	1.31043e+06	1.27896e+06	1.02791e+08	1.05407e+08	9.80878e+07	5.31713e+07	5.21995e+07	5.38326e+07	-	-	CM00922	MetMap110
pmp000583	UPLC-MS/MS	477.1	301.07	-	-	476.096	C22H20O12	[M+H]+	Diosmetin-7-O-glucuronide	香叶木素-7-O-葡萄糖醛酸苷	Flavonoids	黄酮	Flavones	黄酮	35110-20-4	2	-	-	-	27963.4	106791	44986.1	335700	358949	389636	8.0226e+06	8.22301e+06	8.10621e+06	2.89104e+06	2.53735e+06	2.78038e+06	-	-	-	-
pmp001288	UPLC-MS/MS	593.19	285.08	-	-	592.179	C28H32O14	[M+H]+	Acacetin-7-O-rutinoside (Linarin)*	金合欢素-7-O-芸香糖苷 (蒙花苷)*	Flavonoids	黄酮	Flavones	黄酮	480-36-4	2	-	-	-	43463.2	43463.2	43463.2	228957	217316	296220	1.3306e+07	1.2934e+07	1.27655e+07	5.79282e+06	6.07192e+06	5.89875e+06	-	-	-	-
mws1474	UPLC-MS/MS	345.1	284.07	-	-	344.09	C18H16O7	[M+H]+	5,7-Dihydroxy-3',4',5'-trimethoxyflavone	5,7-二羟基-3',4',5'-三甲氧基黄酮	Flavonoids	黄酮	Flavones	黄酮	18103-42-9	3	-	-	-	1222.88	1222.88	1222.88	8731.82	6114.41	8392.19	81758.4	76086.7	91235.5	29225.5	32151.3	24901.3	C19807	-	C19807	-
MWS20151	UPLC-MS/MS	271.06	153.02	-	-	270.053	C15H10O5	[M+H]+	Apigenin; 4',5,7-Trihydroxyflavone*	芹菜素*	Flavonoids	黄酮	Flavones	黄酮	520-36-5	2	-	-	-	10617.6	10617.6	10617.6	62086.3	67021.7	69450.3	115047	101659	119930	70016.5	73043	53088.2	C01477	ko00941,ko00943,ko00944,ko01100,ko01110	C01477	MetMap103,MetMap104
mws0040	UPLC-MS/MS	255.07	153.02	-	-	254.058	C15H10O4	[M+H]+	Chrysin	白杨素	Flavonoids	黄酮	Flavones	黄酮	480-40-0	3	-	-	-	74004.3	83721.3	91449	132079	125057	137603	10233.2	10233.2	10233.2	51166	79655.5	65248.5	C10028	ko00941	C10028	MetMap110
MWSHY0190	UPLC-MS/MS	609.18	301.08	-	-	608.174	C28H32O15	[M+H]+	Diosmetin-7-O-rutinoside (Diosmin)	香叶木苷	Flavonoids	黄酮	Flavones	黄酮	520-27-4	3	-	-	-	155509	141364	103903	104723	131829	123921	4.68978e+06	4.6197e+06	4.06898e+06	904693	720035	887604	C10039	-	C10039	-
MWSslk237	UPLC-MS/MS	463.13	301.07	-	-	462.116	C22H22O11	[M+H]+	Hispidulin-7-O-glucoside(Homoplantaginin)*	高车前素-7-O-葡萄糖苷; 高车前苷*	Flavonoids	黄酮	Flavones	黄酮	17680-84-1	3	-	-	-	180340	155578	195351	684495	846029	828359	2.56534e+06	2.47115e+06	2.43999e+06	1.10515e+06	1.30665e+06	1.30645e+06	C17762	-	C17762	MetMap110
Hmmp003156	UPLC-MS/MS	595.16	313.07	-	-	594.159	C27H30O15	[M+H]+	Isovitexin-7-O-glucoside(Saponarin)	异牡荆素-7-O-葡萄糖苷 (皂草苷)	Flavonoids	黄酮	Flavones	黄酮	20310-89-8	3	-	-	-	54149.4	54149.4	54149.4	529163	544310	499204	568895	446619	499401	453089	270747	313657	C08064	-	C08064	MetMap103,MetMap104
MWSHY0080	UPLC-MS/MS	595.17	287.06	-	-	594.159	C27H30O15	[M+H]+	Luteolin-7-O-neohesperidoside (Lonicerin)*	木犀草素-7-O-新橘皮糖苷 (忍冬苷)*	Flavonoids	黄酮	Flavones	黄酮	25694-72-8	3	-	-	-	44573.6	55477.5	34385.6	126689	156728	399490	1.82174e+06	1.74609e+06	1.57879e+06	1.10276e+06	838505	1.08437e+06	C12630	ko00944	C12630	MetMap105
mws1299	UPLC-MS/MS	449.11	299.05	-	-	448.101	C21H20O11	[M+H]+	Luteolin-8-C-glucoside (Orientin)	木犀草素-8-C-葡萄糖苷 (荭草素)	Flavonoids	黄酮	Flavones	黄酮	28608-75-5	3	-	-	-	118363	206677	133773	180973	144331	155869	34435.8	39267.6	31411.5	80269	89562.6	148966	C10114	-	C10114	MetMap105
pmp001111	UPLC-MS/MS	579.17	525.14	-	-	578.164	C27H30O14	[M+H]+	Violanthin	三色堇黄酮苷	Flavonoids	黄酮	Flavones	黄酮	40581-17-7	3	-	-	-	4552.26	4552.26	4552.26	4552.26	4552.26	4552.26	61453.2	69416.9	22761.3	35281.9	58196.5	68881.3	C10196	-	C10196	-
pme3227	UPLC-MS/MS	579.17	433.11	-	-	578.164	C27H30O14	[M+H]+	Vitexin-2''-O-rhamnoside	牡荆素-2''-O-鼠李糖苷	Flavonoids	黄酮	Flavones	黄酮	64820-99-1	3	-	-	-	1.38683e+06	1.7186e+06	2.43367e+06	95599.5	95599.5	95599.5	95599.5	95599.5	95599.5	629702	477998	508100	C12628	ko00944	C12628	MetMap104
MWSHY0123	UPLC-MS/MS	285.08	270.06	-	-	284.068	C16H12O5	[M+H]+	Wogonin (5,7-Dihydroxy-8-Methoxyflavone)	汉黄芩素 (5,7-二羟基-8-甲氧基黄酮)	Flavonoids	黄酮	Flavones	黄酮	632-85-9	3	-	-	-	7072.39	7072.39	7072.39	35362	39124.5	53261.7	6.75833e+06	6.47533e+06	6.91128e+06	2.53663e+06	2.61702e+06	2.56388e+06	C10197	-	C10197	MetMap110
MWSslk146	UPLC-MS/MS	595.17	433.12	-	-	594.159	C27H30O15	[M+H]+	4'-O-Glucosylvitexin	牡荆素葡萄糖苷	Flavonoids	黄酮	Flavones	黄酮	38950-94-6	3	-	-	-	1.5185e+06	1.16198e+06	1.56437e+06	43431.6	865017	8686.33	356244	115136	527194	371438	861986	797816	-	-	-	-
Hmmp007513	UPLC-MS/MS	375.11	345.06	-	-	374.1	C19H18O8	[M+H]+	5,7-Dihydroxy-6,3',4',5'-tetramethoxyflavone (Arteanoflavone)*	5,7-二羟基-6,3',4',5'-四甲氧基黄酮*	Flavonoids	黄酮	Flavones	黄酮	68710-17-8	3	-	-	-	1047.83	1047.83	1047.83	5239.17	17507.8	9017.63	33229.8	29155.4	25637.5	11611.1	17094	17282.6	-	-	-	-
Zmjp008503	UPLC-MS/MS	329.1	296.07	-	-	328.095	C18H16O6	[M+H]+	5-Hydroxy-4',6,7-trimethoxyflavone (Salvigenin)	三裂鼠尾草素 (5-羟基-4',6,7-三甲氧基黄酮)	Flavonoids	黄酮	Flavones	黄酮	19103-54-9	3	-	-	-	55949.9	70569.7	17156	48421.1	85040.3	51392.2	247697	204705	200702	123841	119168	116893	-	-	-	-
pmp000581	UPLC-MS/MS	475.12	271.06	-	-	474.116	C23H22O11	[M+H]+	Apigenin-7-O-(6''-acetyl)glucoside	芹菜素-7-O-(6''-乙酰)葡萄糖苷	Flavonoids	黄酮	Flavones	黄酮	72741-92-5	3	-	-	-	2477.61	2477.61	2477.61	24965	16645.9	12388	106723	106723	105443	44821.3	36228.3	54728.2	-	-	CM00678	MetMap103
Zmhp002776	UPLC-MS/MS	431.1	255.07	-	-	430.09	C21H18O10	[M+H]+	Chrysin-7-O-Glucuronide	白杨素-7-O-葡萄糖醛酸苷	Flavonoids	黄酮	Flavones	黄酮	35775-49-6	3	-	-	-	12174.4	12174.4	12174.4	61534	60872.2	68790.9	213819	189429	163830	106502	105989	101646	-	-	CM00881	MetMap110
MWSslk165	UPLC-MS/MS	609.18	301.08	-	-	608.174	C28H32O15	[M+H]+	Diosmetin-7-O-Neohesperidoside (Neodiosmin)	香叶木素-7-O-新橘皮糖苷	Flavonoids	黄酮	Flavones	黄酮	38665-01-9	3	-	-	-	120538	123694	132991	122577	95629.1	119948	4.13985e+06	3.68042e+06	4.15435e+06	895345	796668	988415	-	-	-	-
MWSHY0054	UPLC-MS/MS	345.1	312.06	-	-	344.09	C18H16O7	[M+H]+	Eupatorin; 3',5-Dihydroxy-4',6,7-Trimethoxyflavone	泽兰黄素; 3',5-二羟基-4',6,7-三甲氧基黄酮	Flavonoids	黄酮	Flavones	黄酮	855-96-9	3	-	-	-	46456.7	68163	24721.5	16209.7	36214.2	13411.2	2682.24	2682.24	2682.24	17290.4	21424.7	22508.2	-	-	-	-
Jmbp005771	UPLC-MS/MS	375.11	345.06	-	-	374.1	C19H18O8	[M+H]+	Gardenin D*	栀子黄素 D*	Flavonoids	黄酮	Flavones	黄酮	29202-00-4	3	-	-	-	436.389	436.389	436.389	6427.75	5896.85	2181.94	65345.7	69124.8	62869.5	23173.2	36397.9	17365	-	-	-	-
Lmlp002990	UPLC-MS/MS	595.17	313.07	-	-	594.159	C27H30O15	[M+H]+	Isosaponarin(Isovitexin-4'-O-glucoside)	异皂草苷(异牡荆黄素-4'-O-葡萄糖苷)	Flavonoids	黄酮	Flavones	黄酮	19416-87-6	3	-	-	-	4804.35	4804.35	4804.35	234882	250920	216343	24021.7	33703.5	31243.1	58987.5	113130	68638.8	-	-	CM00091	MetMap103,MetMap104
mws1292	UPLC-MS/MS	565.16	409.09	-	-	564.148	C26H28O14	[M+H]+	Isoschaftoside	异夏佛塔苷	Flavonoids	黄酮	Flavones	黄酮	52012-29-0	3	-	-	-	4781.65	4781.65	4781.65	31484.6	37736.6	33008.5	34623.8	53602	47351.8	31868.4	23908.2	32925.7	-	-	-	-
MWS20147	UPLC-MS/MS	449.11	287.06	-	-	448.101	C21H20O11	[M+H]+	Luteolin-3'-O-glucoside	木犀草素-3'-O-葡萄糖苷	Flavonoids	黄酮	Flavones	黄酮	5154-41-6	3	-	-	-	638459	473762	461660	2.49492e+06	2.49379e+06	2.3836e+06	8.14555e+06	5.76165e+06	7.52298e+06	3.51314e+06	3.81681e+06	3.5238e+06	-	-	CM00159	MetMap105
Hmpp003270	UPLC-MS/MS	449.11	287.05	-	-	448.101	C21H20O11	[M+H]+	Luteolin-4'-O-glucoside*	木犀草素-4'-O-葡萄糖苷*	Flavonoids	黄酮	Flavones	黄酮	6920-38-3	1	-	-	-	246842	152596	125384	2.80778e+06	3.72611e+06	2.47835e+06	6.57746e+07	5.64919e+07	6.07798e+07	3.68394e+07	3.54696e+07	4.09405e+07	-	-	CM00160	MetMap105
Zmxp003107	UPLC-MS/MS	611.16	287.06	-	-	610.153	C27H30O16	[M+H]+	Luteolin-7,3'-di-O-glucoside	木犀草素-7,3'-O-二葡萄糖苷	Flavonoids	黄酮	Flavones	黄酮	52187-80-1	3	-	-	-	50474.5	51089.4	38704.5	101463	93325.1	98140.5	371006	347749	451104	197750	196560	272607	-	-	CM00181	MetMap105
pmp000593	UPLC-MS/MS	595.17	287.06	-	-	594.159	C27H30O15	[M+H]+	Luteolin-7-O-rutinoside*	木犀草素-7-O-芸香糖苷*	Flavonoids	黄酮	Flavones	黄酮	3563-98-2	3	-	-	-	32581.9	44289.4	26450.3	75657.4	65732.4	63983.1	393131	363792	406423	244925	157669	303812	-	-	CM00176	MetMap105
Hmgp002036	UPLC-MS/MS	479.12	317.06	-	-	478.111	C22H22O12	[M+H]+	Nepetin-7-O-glucoside(Nepitrin)*	泽兰黄酮-7-O-葡萄糖苷(假荆芥属苷)*	Flavonoids	黄酮	Flavones	黄酮	569-90-4	3	-	-	-	38166	38166	190830	760339	572394	537441	1.4825e+06	1.11828e+06	1.1483e+06	968303	674444	706348	-	-	CM00164	MetMap105
Lmjp005871	UPLC-MS/MS	345.1	312.06	-	-	344.09	C18H16O7	[M+H]+	Penduletin (5,4'-Dihydroxy-3,6,7-trimethoxyflavone)	垂叶黄素	Flavonoids	黄酮	Flavones	黄酮	569-80-2	3	-	-	-	459.083	459.083	459.083	459.083	2295.41	459.083	38239.5	46565.9	62264.6	15603.2	24718.2	11281.9	-	-	-	-
Hmhp005846	UPLC-MS/MS	345.09	330.07	-	-	344.09	C18H16O7	[M+H]+	Tenaxin I	韧黄芩素 I	Flavonoids	黄酮	Flavones	黄酮	86926-52-5	3	-	-	-	3407.65	3407.65	17038.3	80934.6	90932	72252.3	107620	172571	92221.6	73753.1	75053.3	76664.1	-	-	-	-
pmb0736	UPLC-MS/MS	493.13	331.08	-	-	492.127	C23H24O12	[M+H]+	Tricin-7-O-Glucoside*	苜蓿素-7-O-葡萄糖苷*	Flavonoids	黄酮	Flavones	黄酮	32769-01-0	3	-	-	-	23116	23116	115580	323860	320915	293907	488986	227610	475544	192161	308746	454476	-	-	-	-
Lmgp004959	UPLC-MS/MS	639.19	331.08	-	-	638.185	C29H34O16	[M+H]+	Tricin-7-O-neohesperidoside	苜蓿素-7-O-新橙皮糖苷	Flavonoids	黄酮	Flavones	黄酮	53766-40-8	3	-	-	-	106711	112727	144507	52251.6	63337.4	33281.9	948261	994951	869334	295670	347908	343477	-	-	-	-
MWSHY0196	UPLC-MS/MS	285.076	242.06	-	-	284.068	C16H12O5	[M+H]+	Genkwanin (Apigenin 7-methyl ether)*	芫花素 (5,4'-二羟基-7-甲氧基黄酮)*	Flavonoids	黄酮	Flavones	黄酮	437-64-9	1	-	-	-	3682.34	3682.34	3682.34	18411.7	26402.5	21794.4	4.05333e+06	4.2304e+06	4.08817e+06	1.43251e+06	1.38974e+06	1.43493e+06	C10046	-	C10046	MetMap104,MetMap110
MWSHY0069	UPLC-MS/MS	301.07	286.049	-	-	300.063	C16H12O6	[M+H]+	Hispidulin (5,7,4'-Trihydroxy-6-methoxyflavone)*	高车前素*	Flavonoids	黄酮	Flavones	黄酮	1447-88-7	1	-	-	-	50811.4	70909.3	69562.5	295661	362385	356933	2.48776e+06	2.68221e+06	2.45335e+06	1.16671e+06	1.34878e+06	1.17865e+06	C10058	-	C10058	MetMap110
Smbp004322	UPLC-MS/MS	301.07	286.05	-	-	300.063	C16H12O6	[M+H]+	Scutevulin*	半枝莲素*	Flavonoids	黄酮	Flavones	黄酮	80713-32-2	1	-	-	-	64207.1	57541.4	79633.8	614278	606146	652429	5.87e+06	5.65876e+06	5.57368e+06	3.0739e+06	3.25223e+06	3.00241e+06	-	-	-	-
Hmmp004965	UPLC-MS/MS	463.124	301.07	-	-	462.116	C22H22O11	[M+H]+	Diosmetin-7-O-glucoside*	香叶木素-7-O-葡萄糖苷*	Flavonoids	黄酮	Flavones	黄酮	20126-59-4	3	-	-	-	105834	125329	139287	1.02839e+06	925537	852268	2.69934e+06	2.74443e+06	3.15625e+06	1.53724e+06	1.64318e+06	1.00609e+06	-	-	-	-
MWS20148	UPLC-MS/MS	433.113	271.074	-	-	432.106	C21H20O10	[M+H]+	Apigenin-4'-O-glucoside*	芹菜素-4'-O-葡萄糖苷*	Flavonoids	黄酮	Flavones	黄酮	-	1	-	-	-	65762.7	114209	57229.9	1.54202e+06	1.86615e+06	1.66036e+06	5.54473e+07	5.68111e+07	6.18361e+07	3.6276e+07	3.58086e+07	4.1168e+07	-	-	CM00661	MetMap103
pmn001702	UPLC-MS/MS	461.07	285.05	-	-	462.08	C21H18O12	[M-H]-	Tetahydroxyflavone-7-O-glucuronide*	四羟基黄酮-7-O-葡萄糖醛酸苷*	Flavonoids	黄酮	Flavones	黄酮	-	1	-	-	-	1.31223e+06	1.20386e+06	1086176	1.19622e+07	1.15671e+07	1.03636e+07	114630969	1.61234e+08	1.08951e+08	8.96769e+07	9.52479e+07	1.0057e+08	-	-	-	-
Zbrn008158	UPLC-MS/MS	299.06	284.03	-	-	300.063	C16H12O6	[M-H]-	Chrysoeriol; 5,7,4'-Trihydroxy-3'-Methoxyflavone*	金圣草黄素*	Flavonoids	黄酮	Flavones	黄酮	491-71-4	1	-	-	-	177822	202926	171705	173979	154216	161888	1.69029e+07	1.64842e+07	1.69408e+07	7.54464e+06	7.28049e+06	7.38572e+06	C04293	ko00944	C04293	MetMap105
pmb3012	UPLC-MS/MS	461.11	299.06	-	-	462.116	C22H22O11	[M-H]-	Chrysoeriol-7-O-glucoside	金圣草黄素-7-O-葡萄糖苷	Flavonoids	黄酮	Flavones	黄酮	19993-32-9	1	-	-	-	29034.3	29034.3	29034.3	217275	295628	299260	29034.3	548765	186161	176529	208008	145172	-	-	-	-
Zbsn009679	UPLC-MS/MS	313.07	283.03	-	-	314.079	C17H14O6	[M-H]-	Velutin (5,4'-dihydroxy-7,3'-dimethoxyflavone)*	毡毛美洲茶素*	Flavonoids	黄酮	Flavones	黄酮	25739-41-7	1	-	-	-	5030.67	5686.21	5636.33	239861	246857	250746	3.36343e+06	3.24202e+06	3.28264e+06	1.60866e+06	1.58061e+06	1.69193e+06	-	-	-	-
Yyyn008289	UPLC-MS/MS	313.07	298.05	-	-	314.079	C17H14O6	[M-H]-	5,3'-Dihydroxy-7,4'-Dimethoxyflavone	5,3'-二羟基-7,4'-二甲氧基黄酮	Flavonoids	黄酮	Flavones	黄酮	32174-62-2	1	-	-	-	23635.4	13291.1	16499.1	643350	708098	636325	9.55065e+06	1.02347e+07	1.03526e+07	4.93903e+06	5.06736e+06	4.83238e+06	-	-	-	-
Hagn003556	UPLC-MS/MS	387.16	207.1	-	-	388.095	C23H16O6	[M-H]-	7-Benzyloxy-5-hydroxy-3',4'-methylenedioxyflavonoid	7-苄氧基-5-羟基-3',4'-亚甲二氧基黄酮	Flavonoids	黄酮	Flavones	黄酮	-	2	-	-	-	9.03533e+06	1.34167e+07	1.07568e+07	4.99161e+07	4.78109e+07	5.31097e+07	5.4461e+07	4.68777e+07	5.27903e+07	3.67338e+07	4.2313e+07	3.5751e+07	-	-	-	-
Lazn002843	UPLC-MS/MS	785.22	431.1	-	-	786.222	C34H42O21	[M-H]-	Chrysoeriol triglucoside	金圣草黄素三葡萄糖苷	Flavonoids	黄酮	Flavones	黄酮	-	2	-	-	-	7673.8	7673.8	7673.8	46259.8	42435.7	38369	682075	596082	740633	193263	290056	265100	-	-	-	-
HJN005	UPLC-MS/MS	285.08	139.04	-	-	286.084	C16H14O5	[M-H]-	5,2'-Dihydroxy-7-methoxyflavanone	5,2'-二羟基-7-甲氧基黄烷酮	Flavonoids	黄酮	Flavones	黄酮	-	3	-	-	-	55259.8	55259.8	55259.8	55259.8	55259.8	55259.8	683414	599529	597764	276790	301063	276299	-	-	-	-
Zmhn003257	UPLC-MS/MS	299.06	284.04	-	-	300.063	C16H12O6	[M-H]-	5,7,2'-Trihydroxy-8-methoxyflavone*	韧黄芩素 II*	Flavonoids	黄酮	Flavones	黄酮	-	3	-	-	-	153274	185241	130919	347867	431944	322791	2.7078e+06	2.58405e+06	2.65512e+06	1.78108e+06	1.72476e+06	1.81819e+06	-	-	-	-
Hmcn001884	UPLC-MS/MS	463.09	301.03	-	-	464.096	C21H20O12	[M-H]-	6-Hydroxyluteolin 5-glucoside*	6-羟基木犀草素-5-葡萄糖苷*	Flavonoids	黄酮	Flavones	黄酮	-	3	-	-	-	208931	273696	283385	833368	860214	690696	3.7756e+06	3.68264e+06	4.27867e+06	1.72394e+06	2.42345e+06	1.50566e+06	-	-	CM00165	MetMap105
pmb2997	UPLC-MS/MS	799.19	461.1	-	-	800.201	C34H40O22	[M-H]-	Chrysoeriol-7-O-Sophoroside-5-O-glucuronide	金圣草黄素-7-O-槐糖苷-5-O-葡萄糖醛酸	Flavonoids	黄酮	Flavones	黄酮	-	3	-	-	-	20977	31498.1	30284.7	4195.4	4195.4	4195.4	428054	363311	443484	99523.4	141695	87532.1	-	-	-	-
pmb3041	UPLC-MS/MS	521.09	329.2	-	-	522.101	C23H22O14	[M-H]-	Tricin-7-O-saccharic acid	苜蓿素-7-O-葡萄糖二酸苷	Flavonoids	黄酮	Flavones	黄酮	-	3	-	-	-	1.12976e+07	1.35306e+07	7.52706e+06	1.29996e+07	1.12505e+07	7.28377e+06	807363	844513	1.01907e+06	3.80222e+06	4.33464e+06	3.51514e+06	-	-	-	-
Zbqn006065	UPLC-MS/MS	285.04	133.03	-	-	286.048	C15H10O6	[M-H]-	3,5,7,2'-Tetrahydroxyflavone; Datiscetin	3,5,7,2'-四羟基黄酮; 橡精	Flavonoids	黄酮	Flavones	黄酮	480-15-9	2	-	-	-	65619.1	62113.8	56506.6	51039.1	72302.2	77162.8	357219	350536	346284	207772	244702	204155	C10036	-	C10036	-
Lmxn007456	UPLC-MS/MS	359.08	329.03	-	-	360.084	C18H16O8	[M-H]-	Acerosin	5,7,3'-三羟基-6,8,4'-三甲氧基黄酮	Flavonoids	黄酮	Flavones	黄酮	15835-74-2	3	-	-	-	32925.9	32925.9	32925.9	164629	181164	191056	1.53271e+06	1.45883e+06	1.48205e+06	822299	862768	799702	C09982	-	C09982	-
mws1608	UPLC-MS/MS	447.09	357.06	-	-	448.101	C21H20O11	[M-H]-	Luteolin-6-C-glucoside (Isoorientin)	木犀草素-6-C-葡萄糖苷 (异荭草素)	Flavonoids	黄酮	Flavones	黄酮	4261-42-1	3	-	-	-	126286	223656	125724	191694	179923	211207	33553.4	34609	42480.4	78060.4	142016	74918.3	C01821	-	C01821	MetMap105
Hmmn004152	UPLC-MS/MS	595.17	459.11	-	-	596.174	C27H32O15	[M-H]-	Neoeriocitrin	新北美圣草苷	Flavonoids	黄酮	Flavones	黄酮	13241-32-2	3	-	-	-	2329.86	2329.86	2329.86	11649.3	2329.86	11649.3	107144	44941.8	53699	72265.8	46643.1	57117.6	C09805	-	C09805	-
Lmzn001572	UPLC-MS/MS	637.11	351.06	-	-	638.112	C27H26O18	[M-H]-	Scutellarein-7-O-glucuronosyl-(1→2)-glucuronide	野黄芩素-7-O-二葡萄糖醛酸苷	Flavonoids	黄酮	Flavones	黄酮	150641-65-9	3	-	-	-	2546.98	2546.98	2546.98	21329.4	12734.9	13298.9	71543.5	50907.2	101728	36967.8	51879.1	70764.9	-	-	CM00919	MetMap110
Jmln005880	UPLC-MS/MS	345.06	165.02	-	-	346.069	C17H14O8	[M-H]-	Viscidulin III	粘毛黄芩素 III	Flavonoids	黄酮	Flavones	黄酮	92519-91-0	3	-	-	-	5119.69	5119.69	5119.69	31116.8	25598.5	27912.2	251630	142236	253007	154888	110059	133732	-	-	-	-
Lmbn006032	UPLC-MS/MS	301.035	149.024	-	-	302.043	C15H10O7	[M-H]-	Hypolaetin	次衣草亭	Flavonoids	黄酮	Flavones	黄酮	27696-41-9	3	-	-	-	11462.6	10573.2	11562.3	2114.64	2114.64	2114.64	69085.5	73351.8	57870.3	27259	33223.8	25329	C10078	-	C10078	MetMap105,MetMap110
Zbsn003878	UPLC-MS/MS	563.148	353.072	-	-	564.148	C26H28O14	[M-H]-	Vicenin-3	维采宁-3	Flavonoids	黄酮	Flavones	黄酮	59914-91-9	3	-	-	-	12700.4	12700.4	12700.4	68986	80101.3	72323.4	81334.3	70184.9	63501.9	69648.4	78990.1	82323.8	-	-	-	-
pmb2976	UPLC-MS/MS	755.204	447.2	-	-	756.211	C33H40O20	[M-H]-	Chrysoeriol-8-C-arabinoside-7-O-Sophoroside	金圣草黄素-8-C-阿拉伯糖苷-7-O-槐糖苷	Flavonoids	黄酮	Flavones	黄酮	-	3	-	-	-	3965.58	3965.58	3965.58	3965.58	19827.9	3965.58	36150.2	38521.5	38769.4	37366.3	44360.5	34418.8	-	-	-	-
Lmqn006260	UPLC-MS/MS	301.036	151.003	-	-	302.043	C15H10O7	[M-H]-	2',3',4',5,7-Pentahydroxyflavone*	5,7,2',3',4'-五羟基黄酮*	Flavonoids	黄酮	Flavones	黄酮	-	3	-	-	-	20031.2	24345.1	10484.3	2096.85	2096.85	2096.85	65924.4	66834.7	48390.2	52619.1	41609.5	53840.5	-	-	-	-
Hagn007569	UPLC-MS/MS	401.179	59.0137	-	-	402.132	C21H22O8	[M-H]-	5,6,7,3',4',5'-hexanmethoxyflavone	5,6,7,3',4',5'-己甲氧基黄酮	Flavonoids	黄酮	Flavones	黄酮	-	3	-	-	-	137745	176472	138750	338551	334425	325240	27548.9	27548.9	27548.9	185711	173672	187992	-	-	-	-
Zbsn005918	UPLC-MS/MS	503.122	299.058	-	-	504.127	C24H24O12	[M-H]-	Chrysoeriol-7-O-(6''-acetyl)glucoside	金圣草黄素-7-O-(6''-乙酰)葡萄糖苷	Flavonoids	黄酮	Flavones	黄酮	-	3	-	-	-	36194.5	36194.5	36194.5	240975	180973	186678	1.64277e+06	1.16331e+06	2.42315e+06	602089	1.29582e+06	706271	-	-	-	-
Wayn004603	UPLC-MS/MS	477.067	301.037	-	-	478.075	C21H18O13	[M-H]-	Tricetin 3'-glucuronide*	五羟基黄酮 3'-葡糖苷酸*	Flavonoids	黄酮	Flavones	黄酮	-	3	-	-	-	8656.17	8656.17	8656.17	43280.9	68860.4	62597.3	410177	313435	336681	432913	250247	230400	-	-	-	-
Lmdp008003	UPLC-MS/MS	375.11	345.06	-	-	374.1	C19H18O8	[M+H]+	3',5-Dihydroxy-3,4',5',7-tetramethoxyflavone*	3',5-二羟基-3,4',5',7-四甲氧基黄酮; 杨梅素-3,7,3',4'-四甲醚*	Flavonoids	黄酮	Flavones	黄酮	14290-57-4	3	-	-	-	1338.33	1338.33	1338.33	13044.5	6691.65	8704.94	63807	48900.6	57593.7	29253.9	35106.6	30892.4	-	-	-	-
Lmdp007579	UPLC-MS/MS	375.11	345.06	-	-	374.1	C19H18O8	[M+H]+	5,4'-Dihydroxy-6,7,8,3'-tetramethoxyflavone*	5,4'-二羟基-6,7,8,3'-四甲氧基黄酮*	Flavonoids	黄酮	Flavones	黄酮	16520-78-8	3	-	-	-	4926.89	4926.89	4926.89	4926.89	4926.89	4926.89	57469.5	54732.7	46880	32954.2	24634.5	30360.5	-	-	-	-
MWSHY0035	UPLC-MS/MS	463.09	287.06	-	-	462.08	C21H18O12	[M+H]+	Scutellarein-7-O-glucuronide (Scutellarin)*	野黄芩素-7-O-葡萄糖醛酸苷 (野黄芩苷)*	Flavonoids	黄酮	Flavones	黄酮	27740-01-8	1	-	-	-	1.49612e+06	1.51386e+06	1.62415e+06	1.64688e+07	1.57878e+07	1.49574e+07	9.6878e+07	1.0669e+08	9.28019e+07	9.14793e+07	8.91352e+07	9.41987e+07	-	-	CM00901	MetMap110
Lmgp008943	UPLC-MS/MS	345.1	287.06	-	-	344.09	C18H16O7	[M+H]+	3,5-Dihydroxy-7,3',4'-trimethoxyflavone	3,5-二羟基-7,3',4'-三甲氧基黄酮	Flavonoids	黄酮	Flavonols	黄酮醇	6068-80-0	1	-	-	-	72414.2	104672	75113	1.62881e+06	1.68052e+06	1.84665e+06	1.00154e+07	1.0035e+07	8.86644e+06	5.48375e+06	5.39037e+06	5.27995e+06	-	-	-	-
pmp001310	UPLC-MS/MS	627.16	303.1	-	-	626.148	C27H30O17	[M+H]+	6-Hydroxykaempferol-3,6-O-Diglucoside	6-羟基山柰酚-3,6-O-二葡萄糖苷	Flavonoids	黄酮	Flavonols	黄酮醇	-	3	-	-	-	158552	204360	200048	579940	593423	602300	506783	531506	483237	485485	442781	496722	-	-	CM00496	MetMap113,MetMap114
Lmsn002815	UPLC-MS/MS	593.15	285.04	-	-	594.159	C27H30O15	[M-H]-	Kaempferol-3-O-rutinoside(Nicotiflorin)	山柰酚-3-O-芸香糖苷(烟花苷)	Flavonoids	黄酮	Flavonols	黄酮醇	17650-84-9	2	-	-	-	60653.9	37361	32690	93738.8	172616	127172	190040	273167	352496	232535	168048	191427	C21833	ko00944,ko01110	C21833	MetMap113
MWSHY0151	UPLC-MS/MS	319.04	273.04	-	-	318.038	C15H10O8	[M+H]+	Quercetagetin; 3,3',4',5,6,7-Hexahydroxyflavone	槲皮万寿菊素；六羟黄酮	Flavonoids	黄酮	Flavonols	黄酮醇	90-18-6	2	-	-	-	46673.8	46637.1	34822.1	76820.3	64737.6	100305	566982	568637	551836	330415	315224	294928	C10122	-	C10122	-
mws0091	UPLC-MS/MS	463.09	300.03	-	-	464.096	C21H20O12	[M-H]-	Quercetin-3-O-glucoside (Isoquercitrin)	槲皮素-3-O-葡萄糖苷(异槲皮苷)	Flavonoids	黄酮	Flavonols	黄酮醇	482-35-9	3	-	-	-	276633	251901	277332	1.31307e+06	1.01428e+06	1.25328e+06	3.70091e+06	4.39483e+06	4.49537e+06	3.35739e+06	2.1894e+06	3.2833e+06	C05623	ko00944,ko01100,ko01110	C05623	-
mws0917	UPLC-MS/MS	329.07	314.04	-	-	330.074	C17H14O7	[M-H]-	3,7-Di-O-methylquercetin	3,7-二-O-甲基槲皮素	Flavonoids	黄酮	Flavonols	黄酮醇	2068-02-2	2	-	-	-	2.15941e+07	2.40098e+07	2.08875e+07	3.73351e+07	3.82378e+07	4.16381e+07	1.17274e+08	1.12948e+08	1.16062e+08	7.8572e+07	80330806	7.42401e+07	C01265	ko00944,ko01110	C01265	-
Lmgp006006	UPLC-MS/MS	333.06	137.02	-	-	332.053	C16H12O8	[M+H]+	3,5,8,3',4'-Pentahydroxy-7-methoxyflavone; Ranupetin	3,5,8,3',4'-五羟基-7-甲氧基黄酮	Flavonoids	黄酮	Flavonols	黄酮醇	-	1	-	-	-	39750.9	39750.9	39750.9	198754	283886	273526	1.18849e+06	1.14311e+06	1.18718e+06	648578	649922	658420	-	-	-	-
Lmdp004892	UPLC-MS/MS	535.11	287.05	-	-	534.101	C24H22O14	[M+H]+	Kaempferol-3-O-(6''-malonyl)galactoside*	山柰酚-3-O-(6''-丙二酰)半乳糖苷*	Flavonoids	黄酮	Flavonols	黄酮醇	-	1	-	-	-	524970	559483	265648	1.10695e+06	1.31354e+06	1.27768e+06	4.17408e+06	4.32441e+06	5.40851e+06	2.67564e+06	2.46528e+06	2.57671e+06	-	-	CM00477	MetMap113
Lmlp005572	UPLC-MS/MS	433.11	271.06	-	-	432.106	C21H20O10	[M+H]+	Galangin-7-O-glucoside	高良姜素-7-O-葡萄糖苷	Flavonoids	黄酮	Flavonols	黄酮醇	-	1	-	-	-	142062	118536	78827.5	1.71396e+06	1.56998e+06	2.02345e+06	6.03381e+07	5.79051e+07	5.25681e+07	3.42658e+07	3.90209e+07	4.41597e+07	-	-	-	-
Zmhp006502	UPLC-MS/MS	549.12	301.07	-	-	548.117	C25H24O14	[M+H]+	Kaempferide-3-O-(6''-malonyl)glucoside	山柰素-3-O-(6''-丙二酰)葡萄糖苷	Flavonoids	黄酮	Flavonols	黄酮醇	-	1	-	-	-	290382	290382	290382	1.45191e+06	1.56619e+06	1.82953e+06	4.20178e+07	4.3806e+07	4.23765e+07	1.95092e+07	2.01966e+07	1.80181e+07	-	-	CM00479	MetMap114
Smgp004575	UPLC-MS/MS	465.1	303.05	-	-	464.096	C21H20O12	[M+H]+	Quercetin-5-O-β-D-glucoside*	槲皮素-5-O-β-D-葡萄糖苷*	Flavonoids	黄酮	Flavonols	黄酮醇	-	1	-	-	-	790666	726453	641289	2.51002e+06	2.93376e+06	2.6503e+06	1.36767e+07	2.66856e+07	1.67491e+07	6.5385e+06	6.17353e+06	7.82597e+06	-	-	-	-
Lmgp005640	UPLC-MS/MS	479.12	317.07	-	-	478.111	C22H22O12	[M+H]+	Isorhamnetin-3-O-Galactoside; Cacticin	异鼠李素-3-O-β-D-半乳糖苷; 仙人掌素	Flavonoids	黄酮	Flavonols	黄酮醇	6743-92-6	1	-	-	-	34448.6	23363.5	44219	579396	505080	620785	5.795e+06	6.91475e+06	7.27684e+06	3.74597e+06	2.89224e+06	2.6818e+06	-	-	-	-
Hmyp008708	UPLC-MS/MS	285.08	242.06	-	-	284.068	C16H12O5	[M+H]+	Izalpinin*	良姜素*	Flavonoids	黄酮	Flavonols	黄酮醇	480-14-8	1	-	-	-	4736.58	10439.1	18069.3	17238.2	20600.2	16505.1	3.95672e+06	3.96059e+06	3.89003e+06	1.52447e+06	1.31312e+06	1.458e+06	-	-	-	-
Hmgp004006	UPLC-MS/MS	331.08	316.05	-	-	330.074	C17H14O7	[M+H]+	3,5,3'-Trihydroxy-7,4'-dimethoxyflavone (Ombuin)	商路黄素	Flavonoids	黄酮	Flavonols	黄酮醇	529-40-8	1	-	-	-	72560.9	89194.9	63030.1	618393	564954	708032	1.21592e+07	10613538	8.94448e+06	8.18612e+06	7.68043e+06	7.13463e+06	-	-	-	-
pmp000589	UPLC-MS/MS	551.1	303.05	-	-	550.096	C24H22O15	[M+H]+	Quercetin-7-O-(6''-malonyl)glucoside	槲皮素-7-O-(6''-丙二酰)葡萄糖苷	Flavonoids	黄酮	Flavonols	黄酮醇	98767-37-4	1	-	-	-	657399	774316	603613	1.77169e+06	1.92689e+06	1.94327e+06	6.23389e+06	8.26076e+06	5.45666e+06	3.90481e+06	3.59543e+06	3.19053e+06	-	-	-	-
Lmmp003817	UPLC-MS/MS	535.11	287.05	-	-	534.101	C24H22O14	[M+H]+	Kaempferol-3-O-(6''-malonyl)glucoside*	山柰酚-3-O-(6''-丙二酰)葡萄糖苷*	Flavonoids	黄酮	Flavonols	黄酮醇	81149-02-2	1	-	-	-	579675	564282	64678.9	1.2035e+06	1.10101e+06	1.28798e+06	4.57017e+06	4.32058e+06	5.47868e+06	2.42899e+06	2.16836e+06	2.20481e+06	-	-	CM00478	MetMap113
Lmdp003286	UPLC-MS/MS	465.1	303.06	-	-	464.096	C21H20O12	[M+H]+	Quercetin-3-O-alloside; Isohyperoside*	槲皮素-3-O-阿洛糖苷; 异金丝桃苷*	Flavonoids	黄酮	Flavonols	黄酮醇	35589-21-0	1	-	-	-	759188	655952	666021	2.61802e+06	3.04451e+06	3.44045e+06	1.83085e+07	2.30926e+07	1.61201e+07	7.29185e+06	7.35752e+06	6.9472e+06	-	-	-	-
pmp001309	UPLC-MS/MS	465.1	303.1	-	-	464.096	C21H20O12	[M+H]+	6-Hydroxykaempferol-7-O-glucoside	6-羟基山柰酚-7-O-葡萄糖苷	Flavonoids	黄酮	Flavonols	黄酮醇	-	1	-	-	-	827174	821472	686966	2.63402e+06	3.1553e+06	3.1751e+06	1.64413e+07	2.52648e+07	1.75809e+07	7.4006e+06	7.83792e+06	8.4401e+06	-	-	CM00470	MetMap114
Hmgp002080	UPLC-MS/MS	641.17	317.06	-	-	640.164	C28H32O17	[M+H]+	Patuletin-7-O-rutinoside	万寿菊素-7-O-芸香糖苷	Flavonoids	黄酮	Flavonols	黄酮醇	-	2	-	-	-	55139.9	57456.6	49882.2	531793	643630	541499	1.69386e+06	1.20028e+06	2.06484e+06	1.09347e+06	1.02508e+06	860652	-	-	-	-
Zmhp005139	UPLC-MS/MS	565.12	317.07	-	-	564.111	C25H24O15	[M+H]+	Tamarixetin-3-O-(6''-malonyl)glucoside*	柽柳黄素-3-O-(6''-丙二酰)葡萄糖苷*	Flavonoids	黄酮	Flavonols	黄酮醇	-	2	-	-	-	190346	197940	158866	563122	674446	655435	701914	842761	754048	431544	533024	587763	-	-	-	-
Lmqp007185	UPLC-MS/MS	579.15	147.05	-	-	578.142	C30H26O12	[M+H]+	Kaempferol-3-O-(4''-O-p-Coumaroyl)rhamnoside	山柰酚-3-O-(4''-O-对香豆酰)鼠李糖苷	Flavonoids	黄酮	Flavonols	黄酮醇	-	2	-	-	-	11489.7	11489.7	11489.7	57448.7	60695.5	72432.7	1.19186e+06	1.18375e+06	1.22659e+06	511393	530694	555667	-	-	CM00482	MetMap114
HJAP006	UPLC-MS/MS	509.13	347.08	-	-	508.122	C23H24O13	[M+H]+	Syringetin-7-O-glucoside	丁香亭-7-O-葡萄糖苷	Flavonoids	黄酮	Flavonols	黄酮醇	-	2	-	-	-	7306.07	7306.07	7306.07	46415.2	36530.4	46853.9	390519	400865	356910	123078	188834	180633	-	-	-	-
Lmjp003655	UPLC-MS/MS	463.12	301.08	-	-	462.116	C22H22O11	[M+H]+	6-C-MethylKaempferol-3-glucoside*	6-甲基山柰酚-3-O-葡萄糖苷*	Flavonoids	黄酮	Flavonols	黄酮醇	-	3	-	-	-	139240	118554	127832	667877	1.24409e+06	1.03311e+06	3.02983e+06	1.98178e+06	2.71429e+06	1.45662e+06	1.38263e+06	1.2759e+06	-	-	CM00467	MetMap113
pmp001311	UPLC-MS/MS	627.16	303.1	-	-	626.148	C27H30O17	[M+H]+	6-Hydroxykaempferol-7,6-O-Diglucoside	6-羟基山柰酚-7,6-O-二葡萄糖苷	Flavonoids	黄酮	Flavonols	黄酮醇	-	3	-	-	-	189073	150573	136370	506893	541190	550390	2.065e+06	1.86792e+06	1.9048e+06	747055	956904	1.09393e+06	-	-	CM00497	MetMap114
Zmhp003784	UPLC-MS/MS	627.16	465.1	-	-	626.148	C27H30O17	[M+H]+	Gossypetin-7-O-(3''-glucosyl)rhamnoside; Rhodioflavonoside	棉黄素-7-O-(3''-葡萄糖基)鼠李糖苷	Flavonoids	黄酮	Flavonols	黄酮醇	-	3	-	-	-	274234	190960	205665	302626	307094	313516	237825	246758	217728	241174	232241	256806	-	-	-	-
pmb0645	UPLC-MS/MS	627.19	465.2	-	-	626.185	C28H34O16	[M+H]+	Hesperetin-6-C-glucoside-7-O-glucoside	橙皮素-6-C-葡萄糖苷-7-O-葡萄糖苷	Flavonoids	黄酮	Flavonols	黄酮醇	-	3	-	-	-	122823	164160	180883	270244	266894	353965	216612	211029	211029	291071	259037	214378	-	-	-	-
pmb0618	UPLC-MS/MS	627.19	465.1	-	-	626.185	C28H34O16	[M+H]+	Hesperetin-8-C-glucoside-3'-O-glucoside	橙皮素-8-C-葡萄糖苷-3'-O-葡萄糖苷	Flavonoids	黄酮	Flavonols	黄酮醇	-	3	-	-	-	107926	79470.6	50630.1	205775	186536	213303	766192	713496	693516	247631	401506	383887	-	-	-	-
Hmcp002316	UPLC-MS/MS	449.11	317.06	-	-	448.101	C21H20O11	[M+H]+	Isorhamnetin-3-O-arabinoside	异鼠李素-3-O-阿拉伯糖苷	Flavonoids	黄酮	Flavonols	黄酮醇	-	3	-	-	-	5901.82	5901.82	5901.82	29509.1	5901.82	5901.82	147538	148600	194507	59011.1	101621	93969.6	-	-	-	-
Lmmp003903	UPLC-MS/MS	491.12	287.05	-	-	490.111	C23H22O12	[M+H]+	Kaempferol-3-O-(2''-O-acetyl)glucoside	山柰酚-3-O-(2''-O-乙酰)葡萄糖苷	Flavonoids	黄酮	Flavonols	黄酮醇	-	3	-	-	-	5241.83	5241.83	5241.83	5241.83	5241.83	5241.83	54840.6	54418	54843.9	34418.4	27607.3	26209.1	-	-	CM00472	MetMap113
Xmyp004678	UPLC-MS/MS	727.21	287.05	-	-	726.201	C32H38O19	[M+H]+	Kaempferol-3-O-(2''-O-xylosyl-6''-O-rhamnosyl)glucoside	山柰酚-3-O-(2''-O-木糖基-6''-O-鼠李糖基)葡萄糖苷	Flavonoids	黄酮	Flavonols	黄酮醇	-	3	-	-	-	3382.43	3382.43	3382.43	3382.43	3382.43	3382.43	36145.8	30188.3	38600.6	27758.2	19316.3	16912.1	-	-	CM00500	MetMap113
Hmcp001629	UPLC-MS/MS	697.16	449.1	-	-	696.154	C30H32O19	[M+H]+	Kaempferol-3-O-(6''-Malonyl)glucoside-7-O-Glucoside	山柰酚-3-O-(6''-丙二酰)葡萄糖苷-7-O-葡萄糖苷	Flavonoids	黄酮	Flavonols	黄酮醇	-	3	-	-	-	3170.9	3170.9	3170.9	3170.9	15854.5	3170.9	3170.9	41213	3170.9	17971.1	29956.2	28535	-	-	CM00499	MetMap113,MetMap114
Lmyp004318	UPLC-MS/MS	595.14	287.06	-	-	594.137	C30H26O13	[M+H]+	Kaempferol-3-O-(6''-p-Coumaroyl)galactoside	山柰酚-3-O-(6''-对香豆酰)半乳糖苷	Flavonoids	黄酮	Flavonols	黄酮醇	-	3	-	-	-	68554.4	68554.4	68554.4	342772	422340	427753	3.15809e+06	3.0703e+06	3.72393e+06	1.47851e+06	1.63483e+06	1.7383e+06	-	-	CM00485	MetMap113
pmp001105	UPLC-MS/MS	757.22	287.06	-	-	756.211	C33H40O20	[M+H]+	Kaempferol-3-O-neohesperidoside-7-O-glucoside*	山柰酚-3-O-新橙皮糖苷-7-O-葡萄糖苷*	Flavonoids	黄酮	Flavonols	黄酮醇	-	3	-	-	-	21636.1	32967	28388.8	21981.7	17864	21981.7	605119	549211	458651	213308	158384	216057	-	-	CM00506	MetMap113,MetMap114
Lmsp003161	UPLC-MS/MS	757.22	287.06	-	-	756.211	C33H40O20	[M+H]+	Kaempferol-3-O-sophoroside-7-O-rhamnoside*	山柰酚-3-O-槐糖苷-7-O-鼠李糖苷*	Flavonoids	黄酮	Flavonols	黄酮醇	-	3	-	-	-	16447.7	30220.7	20149.8	18318	11251.9	22560.5	558434	527243	450410	226125	174859	218800	-	-	CM00505	MetMap113,MetMap114
HJAP024	UPLC-MS/MS	611.16	491.12	-	-	610.154	C27H30O16	[M+H]+	Kaempferol-6,8-di-C-glucoside	山柰酚-6,8-二-C-葡萄糖苷	Flavonoids	黄酮	Flavonols	黄酮醇	-	3	-	-	-	8834.18	8834.18	8834.18	112768	95851.6	104311	47128.9	51680	47931.5	48861.5	54508.2	44170.9	-	-	-	-
Hmcp002399	UPLC-MS/MS	509.13	347.07	-	-	508.122	C23H24O13	[M+H]+	Limocitrin-3-O-glucoside	柠檬素-3-O-葡萄糖苷	Flavonoids	黄酮	Flavonols	黄酮醇	-	3	-	-	-	11670.4	11670.4	11670.4	65620.3	72727.9	58352	501749	471277	451337	192065	195236	175838	-	-	-	-
Lmtp004126	UPLC-MS/MS	567.1	319.04	-	-	566.091	C24H22O16	[M+H]+	Myricetin-3-O-(6''-malony)glucoside*	杨梅素-3-O-(6''-丙二酰)葡萄糖苷*	Flavonoids	黄酮	Flavonols	黄酮醇	-	3	-	-	-	97653.9	117464	85283.6	56873.6	60573.9	32152.7	6430.54	6430.54	6430.54	108462	93298.7	62272.8	-	-	-	-
Lmjp003231	UPLC-MS/MS	495.11	333.07	-	-	494.106	C22H22O13	[M+H]+	Patuletin-3-O-glucoside*	万寿菊素-3-O-葡萄糖苷*	Flavonoids	黄酮	Flavonols	黄酮醇	-	3	-	-	-	725821	689197	570213	163397	157790	143837	336467	326439	387880	281218	483938	514533	-	-	-	-
Lmdp004160	UPLC-MS/MS	789.19	325.09	-	-	788.18	C36H36O20	[M+H]+	Quercetin-3-O-(2'''-O-caffeoyl)sophoroside	槲皮素-3-O-(2'''-O-咖啡酰)槐糖苷	Flavonoids	黄酮	Flavonols	黄酮醇	-	3	-	-	-	1.31514e+06	1.07265e+06	797844	1.36572e+06	1.44104e+06	1.33684e+06	598685	598649	707380	1.09718e+06	884744	858702	-	-	-	-
Lmdp004574	UPLC-MS/MS	803.2	339.11	-	-	802.196	C37H38O20	[M+H]+	Quercetin-3-O-(2'''-O-feruloyl)sophoroside	槲皮素-3-O-(2'''-O-阿魏酰)槐糖苷	Flavonoids	黄酮	Flavonols	黄酮醇	-	3	-	-	-	133676	132504	215780	268512	263823	320149	45193.2	37088.8	36367.2	184095	141902	137193	-	-	-	-
Lmdp004011	UPLC-MS/MS	935.25	325.09	-	-	934.238	C42H46O24	[M+H]+	Quercetin-3-O-(6''-O-Caffeoyl)sophoroside-7-O-rhamnoside	槲皮素-3-O-(6''-O-咖啡酰)槐糖苷-7-O-鼠李糖苷	Flavonoids	黄酮	Flavonols	黄酮醇	-	3	-	-	-	106226	131573	79683.9	164162	149678	134006	94169.9	100207	82099.4	127987	123142	123125	-	-	-	-
Lmtp004044	UPLC-MS/MS	597.14	303.04	-	-	596.138	C26H28O16	[M+H]+	Quercetin-3-O-apiosyl(1→2)galactoside*	槲皮素-3-O-芹糖基(1→2)半乳糖苷*	Flavonoids	黄酮	Flavonols	黄酮醇	-	3	-	-	-	65163.3	108602	74350	99587.1	125403	90983	6887.17	34435.8	6887.17	60247.2	57791	77459.1	-	-	-	-
Lmsp004166	UPLC-MS/MS	611.16	303.05	-	-	610.153	C27H30O16	[M+H]+	Quercetin-3-O-glucoside-7-O-rhamnoside	槲皮素-3-O-葡萄糖苷-7-O-鼠李糖苷	Flavonoids	黄酮	Flavonols	黄酮醇	-	3	-	-	-	31947.3	57303.6	65683.1	68162.3	57927.8	83026.6	205227	134539	221972	162422	157388	139760	-	-	-	-
Lmmp003306	UPLC-MS/MS	567.13	303.05	-	-	566.127	C25H26O15	[M+H]+	Quercetin-3-O-xylosyl(1→2)arabinoside	槲皮素-3-O-木糖基(1→2)阿拉伯糖苷	Flavonoids	黄酮	Flavonols	黄酮醇	-	3	-	-	-	1920.61	1920.61	1920.61	1920.61	1920.61	1920.61	32233	15257.6	9603.06	34014.2	28154.6	37528.2	-	-	-	-
Hmjp003123	UPLC-MS/MS	479.08	303.06	-	-	478.075	C21H18O13	[M+H]+	Quercetin-5-O-glucuronide	槲皮素-5-O-葡萄糖醛酸苷	Flavonoids	黄酮	Flavonols	黄酮醇	-	3	-	-	-	9021.45	9021.45	9021.45	9021.45	9021.45	9021.45	220317	164425	149537	68406.1	88066.4	45107.3	-	-	-	-
Lmmp002995	UPLC-MS/MS	713.15	303.06	-	-	712.149	C30H32O20	[M+H]+	Quercetin-7-O-(2''-malonyl)glucosyl-5-O-glucoside	槲皮素-7-O-(2''-丙二酰)葡萄糖苷-5-O-葡萄糖苷	Flavonoids	黄酮	Flavonols	黄酮醇	-	3	-	-	-	280584	220077	207631	421541	432609	516728	772406	653766	710900	479578	462335	567335	-	-	-	-
pmb0709	UPLC-MS/MS	713.16	465.2	-	-	712.149	C30H32O20	[M+H]+	Quercetin-7-O-(6''-malonyl)glucosyl-5-O-glucoside	槲皮素-7-O-(6''-丙二酰)葡萄糖苷-5-O-葡萄糖苷	Flavonoids	黄酮	Flavonols	黄酮醇	-	3	-	-	-	192827	197823	142131	446270	416542	343667	695787	459741	535342	374519	410420	432612	-	-	-	-
HJAP007	UPLC-MS/MS	551.14	347.08	-	-	550.132	C25H26O14	[M+H]+	Syringetin-3-O-(6''-Acetyl)glucoside	丁香亭-3-O-(6''-乙酰)葡萄糖苷	Flavonoids	黄酮	Flavonols	黄酮醇	-	3	-	-	-	19538.8	31746.5	30522.2	47438.2	31415.6	33208.5	3052.73	3052.73	3052.73	17949.6	20647.6	15263.6	-	-	-	-
HJAP148	UPLC-MS/MS	581.15	287.06	-	-	580.143	C26H28O15	[M+H]+	Kaempferol-3-O-sambubioside	山柰酚-3-O-桑布双糖苷	Flavonoids	黄酮	Flavonols	黄酮醇	27661-51-4	2	-	-	-	30812.6	20531.1	12081.3	645535	645535	776913	1.76423e+07	1.59514e+07	1.63326e+07	8.45141e+06	9.10326e+06	8.95868e+06	-	-	CM00483	MetMap113
mws0032	UPLC-MS/MS	319.04	153.02	-	-	318.038	C15H10O8	[M+H]+	Myricetin	杨梅素	Flavonoids	黄酮	Flavonols	黄酮醇	529-44-2	2	-	-	-	11830.2	11830.2	11830.2	11830.2	11830.2	11830.2	109618	142243	116734	70191.7	70979.5	59151.1	C10107	ko00941,ko00944,ko01110	C10107	-
Lmjp005558	UPLC-MS/MS	375.11	286.08	-	-	374.1	C19H18O8	[M+H]+	Quercetagetin-3,7,3',4'-Tetramethyl Ether	槲皮万寿菊素-3,7,3',4'-四甲醚	Flavonoids	黄酮	Flavonols	黄酮醇	63296-15-1	2	-	-	-	5835.19	5835.19	5835.19	5835.19	5835.19	5835.19	61758.7	80505.1	55135.4	29176	38602.7	29996.5	-	-	-	-
Lmtp008852	UPLC-MS/MS	331.08	167.03	-	-	330.074	C17H14O7	[M+H]+	Rhamnazin (3,4',5-Trihydroxy-3',7-dimethoxyflavone)	鼠李秦素	Flavonoids	黄酮	Flavonols	黄酮醇	552-54-5	2	-	-	-	314531	302449	296247	2.81e+07	3.10773e+07	3.17861e+07	3.48132e+07	3.49426e+07	3.34924e+07	8.82008e+07	9.35175e+07	9.5419e+07	-	-	-	-
Zmjp005293	UPLC-MS/MS	593.19	285.08	-	-	592.179	C28H32O14	[M+H]+	Acacetin-7-O-neohesperidoside*	刺槐素-7-O-新橙皮糖苷*	Flavonoids	黄酮	Flavonols	黄酮醇	20633-93-6	2	-	-	-	42444.7	42444.7	42444.7	242287	212224	247566	1.06885e+07	1.0546e+07	1.0961e+07	5.31716e+06	5.16962e+06	5.14072e+06	-	-	-	-
mws2186	UPLC-MS/MS	435.09	303.05	-	-	434.085	C20H18O11	[M+H]+	Avicularin(Quercetin-3-O-α-L-arabinofuranoside)*	扁蓄苷(广寄生苷)*	Flavonoids	黄酮	Flavonols	黄酮醇	572-30-5	3	-	-	-	17536.2	3507.24	3507.24	34014.2	33609.9	28154.6	24341.2	106997	21121.6	21115.6	22028.8	17598.1	C22608	-	C22608	-
Lmjp002596	UPLC-MS/MS	597.14	303.05	-	-	596.138	C26H28O16	[M+H]+	Quercetin-3-O-sambubioside*	槲皮素-3-O-桑布双糖苷*	Flavonoids	黄酮	Flavonols	黄酮醇	83048-35-5	3	-	-	-	57791	66395.1	109423	98355.3	105735	138927	93744.8	39000.5	38128	68851.3	76231	68851.3	C12637	ko00944	C12637	-
MWSHY0162	UPLC-MS/MS	627.16	303.06	-	-	626.148	C27H30O17	[M+H]+	Quercetin-3-O-sophoroside (Baimaside)	槲皮素-3-O-槐糖苷(白麻苷)	Flavonoids	黄酮	Flavonols	黄酮醇	18609-17-1	3	-	-	-	84862.9	127310	158555	455610	486876	773745	486560	470831	570895	315978	362991	348383	C12667	ko00944,ko01110	C12667	-
MWSslk232	UPLC-MS/MS	625.18	301.08	-	-	624.169	C28H32O16	[M+H]+	Complanatuside	沙苑子苷	Flavonoids	黄酮	Flavonols	黄酮醇	116183-66-5	3	-	-	-	55739.1	63012.8	45905.1	437594	435302	524053	489449	617321	543408	432085	346112	404055	-	-	-	-
Hmcp001578	UPLC-MS/MS	641.17	479.11	-	-	640.164	C28H32O17	[M+H]+	Isorhamnetin-3,7-O-diglucoside	异鼠李素-3,7-O-二葡萄糖苷	Flavonoids	黄酮	Flavonols	黄酮醇	6758-51-6	3	-	-	-	4829.34	4829.34	4829.34	37263.3	37263.3	52794.3	54947.8	39703.9	99369.3	32943.4	24146.7	46777.6	-	-	-	-
Lmsp004045	UPLC-MS/MS	625.18	317.07	-	-	624.169	C28H32O16	[M+H]+	Isorhamnetin-3-O-glucoside-7-O-rhamnoside	异鼠李素-3-O-葡萄糖苷-7-O-鼠李糖苷	Flavonoids	黄酮	Flavonols	黄酮醇	17331-71-4	3	-	-	-	67604.1	91741.7	61576.4	119303	120710	123145	102619	50911.3	98716.2	84192.7	121932	78134.9	-	-	-	-
MWSHY0064	UPLC-MS/MS	625.17	317.07	-	-	624.169	C28H32O16	[M+H]+	Isorhamnetin-3-O-neohesperidoside*	异鼠李素-3-O-新橙皮糖苷*	Flavonoids	黄酮	Flavonols	黄酮醇	55033-90-4	3	-	-	-	42798	37331.3	52186.6	63705.9	44431.6	58786.6	99447.3	129494	93338.8	32439.6	30955.5	46781.2	-	-	-	-
MWSHY0135	UPLC-MS/MS	625.18	317.08	-	-	624.169	C28H32O16	[M+H]+	Isorhamnetin-3-O-rutinoside (Narcissin)*	异鼠李素-3-O-芸香糖苷 (水仙苷)*	Flavonoids	黄酮	Flavonols	黄酮醇	604-80-8	3	-	-	-	33365.8	43749.5	54215.4	58452.9	42755.9	21783.2	122734	68300.2	65347.9	69539	73329.5	44089.6	-	-	-	-
Hmcp002207	UPLC-MS/MS	479.12	317.06	-	-	478.111	C22H22O12	[M+H]+	Isorhamnetin-7-O-glucoside (Brassicin)	异鼠李素-7-O-葡萄糖苷 (蔓菁苷)	Flavonoids	黄酮	Flavonols	黄酮醇	6743-96-0	3	-	-	-	6762.01	33810.1	195565	511957	547272	734516	791843	876544	1.13524e+06	822110	431217	554736	-	-	-	-
Lmbp002592	UPLC-MS/MS	611.16	287.05	-	-	610.153	C27H30O16	[M+H]+	Kaempferol-3,7-O-diglucoside	山柰酚-3,7-O-双葡萄糖苷	Flavonoids	黄酮	Flavonols	黄酮醇	25615-14-9	3	-	-	-	61732.6	66655.1	84821.1	60579.1	34342.4	46509.5	422049	440223	515024	256462	204939	234215	-	-	-	-
Lmsp004670	UPLC-MS/MS	595.17	287.06	-	-	594.159	C27H30O15	[M+H]+	Kaempferol-3-O-glucoside-7-O-rhamnoside*	山柰酚-3-O-葡萄糖苷-7-O-鼠李糖苷*	Flavonoids	黄酮	Flavonols	黄酮醇	2392-95-2	3	-	-	-	39345.3	108907	38708.6	371637	131915	163217	1.62084e+06	1.57868e+06	1.88109e+06	1.04611e+06	800735	933797	-	-	CM00487	MetMap113,MetMap114
MWSHY0061	UPLC-MS/MS	595.16	287.06	-	-	594.159	C27H30O15	[M+H]+	Kaempferol-3-O-neohesperidoside*	山柰酚-3-O-新橙皮糖苷*	Flavonoids	黄酮	Flavonols	黄酮醇	32602-81-6	3	-	-	-	96731.2	78134.9	76066	288228	393034	351809	1.84571e+06	1.38306e+06	1.77817e+06	842128	904835	1.11533e+06	-	-	CM00489	MetMap113
Lmpp003268	UPLC-MS/MS	757.22	287.06	-	-	756.211	C33H40O20	[M+H]+	Kaempferol-3-O-rutinoside-7-O-glucoside	山柰酚-3-O-芸香糖苷-7-O-葡萄糖苷	Flavonoids	黄酮	Flavonols	黄酮醇	34336-18-0	3	-	-	-	42186.7	28533.4	38701.1	18003	12522.3	23103.9	244889	189620	272110	44389.2	35287.1	36413.3	-	-	CM00507	MetMap113,MetMap114
HJAP005	UPLC-MS/MS	495.11	333.07	-	-	494.106	C22H22O13	[M+H]+	Laricitrin-3-O-glucoside*	西伯利亚落叶松黄酮-3-O-葡萄糖苷*	Flavonoids	黄酮	Flavonols	黄酮醇	39986-90-8	3	-	-	-	450168	650551	811404	160066	156714	157790	338703	241337	340789	360133	288998	276930	-	-	-	-
Zmcp002666	UPLC-MS/MS	627.14	303.05	-	-	626.148	C27H30O17	[M+H]+	Quercetin-3,7-Di-O-glucoside*	槲皮素-3,7-二-O-葡萄糖苷*	Flavonoids	黄酮	Flavonols	黄酮醇	6892-74-6	3	-	-	-	122665	130331	146204	443437	413055	523910	1.10388e+06	1.05789e+06	1.17698e+06	955845	735853	698379	-	-	-	-
pmp000596	UPLC-MS/MS	627.16	465.1	-	-	626.148	C27H30O17	[M+H]+	Quercetin-3-O-(2''-O-galactosyl)glucoside	槲皮素-3-O-(2''-O-半乳糖基)葡萄糖苷	Flavonoids	黄酮	Flavonols	黄酮醇	56782-99-1	3	-	-	-	193477	376465	346502	101921	84781.8	210391	51985.7	47135.5	84366.8	87508.5	72347	66457.8	-	-	-	-
Hmlp003068	UPLC-MS/MS	627.15	303.05	-	-	626.148	C27H30O17	[M+H]+	Quercetin-3-O-(4''-glucosyl)glucoside; Meratin*	槲皮素-3-O-(4''-葡萄糖基)葡萄糖苷; 蜡梅苷*	Flavonoids	黄酮	Flavonols	黄酮醇	27215-04-9	3	-	-	-	142253	145324	153598	441797	498238	466429	999116	1.28956e+06	1.42499e+06	408946	364605	671130	-	-	-	-
Lmmp003783	UPLC-MS/MS	479.09	303.05	-	-	478.075	C21H18O13	[M+H]+	Quercetin-3-O-glucuronide	槲皮素-3-O-葡萄糖醛酸苷	Flavonoids	黄酮	Flavonols	黄酮醇	22688-79-5	3	-	-	-	18599.8	18599.8	18599.8	18599.8	18599.8	18599.8	207018	268862	209286	92999.1	125576	103981	-	-	-	-
Lmdp003509	UPLC-MS/MS	435.09	303.06	-	-	434.085	C20H18O11	[M+H]+	Quercetin-3-O-xyloside (Reynoutrin)*	槲皮素-3-O-木糖苷 (瑞诺苷)*	Flavonoids	黄酮	Flavonols	黄酮醇	549-32-6	3	-	-	-	20864.4	3754.41	3754.41	30496.7	38704.5	22293.6	39403.3	140967	29812.7	35185.6	18772	35185.6	-	-	-	-
Lmjp002906	UPLC-MS/MS	479.12	317.07	-	-	478.111	C22H22O12	[M+H]+	Rhamnetin-3-O-Glucoside*	鼠李素-3-O-葡萄糖苷*	Flavonoids	黄酮	Flavonols	黄酮醇	27875-34-9	3	-	-	-	361947	278859	367767	686508	750503	676016	1.08116e+06	1.05919e+06	1.08769e+06	858476	755986	686848	-	-	-	-
Lmjp004941	UPLC-MS/MS	301.071	286.047	-	-	300.063	C16H12O6	[M+H]+	3,5,4'-Trihydroxy-7-methoxyflavone (Rhamnocitrin)*	鼠李柠檬素*	Flavonoids	黄酮	Flavonols	黄酮醇	569-92-6	1	-	-	-	66772.5	63028.2	57159.3	299362	189322	338318	2.99414e+06	3.09032e+06	2.69062e+06	1.2746e+06	1.31768e+06	1.30936e+06	C17059	-	C17059	MetMap114
Xmyp005654	UPLC-MS/MS	449.106	287.056	-	-	448.101	C21H20O11	[M+H]+	Kaempferol-4'-O-glucoside*	山柰酚-4'-O-葡萄糖苷*	Flavonoids	黄酮	Flavonols	黄酮醇	-	1	-	-	-	177311	85157.9	190685	3.71937e+06	4.21201e+06	3.78626e+06	6.02786e+07	5.2342e+07	5.60834e+07	3.76512e+07	3.66331e+07	3.63597e+07	-	-	CM00461	MetMap114
Lmmp002143	UPLC-MS/MS	567.097	319.046	-	-	566.091	C24H22O16	[M+H]+	Gossypetin-3-O-(6''-malonyl)glucoside*	棉黄素-3-O-(6''-丙二酰)葡萄糖苷*	Flavonoids	黄酮	Flavonols	黄酮醇	-	3	-	-	-	102047	98359	132779	66395.1	45498.9	35663	6314.84	6314.84	6314.84	31574.2	70080.6	70450.8	-	-	-	-
Zbjn004445	UPLC-MS/MS	461.07	285.04	-	-	462.08	C21H18O12	[M-H]-	Kaempferol-7-O-glucuronide*	山柰酚-7-O-葡萄糖醛酸苷*	Flavonoids	黄酮	Flavonols	黄酮醇	-	1	-	-	-	371703	385480	394022	3.16955e+06	3.09555e+06	3.2554e+06	5.93046e+07	4.53594e+07	5.4322e+07	3.0533e+07	2.60422e+07	2.8487e+07	-	-	-	-
Zbjn008081	UPLC-MS/MS	299.06	284.04	-	-	300.063	C16H12O6	[M-H]-	Kaempferide (3,5,7-Trihydroxy-4'-methoxyflavone)*	山柰素*	Flavonoids	黄酮	Flavonols	黄酮醇	491-54-3	1	-	-	-	140954	173277	118488	143860	125062	158820	1.51047e+07	1.59382e+07	1.45691e+07	6.56749e+06	6.36601e+06	6.4381e+06	C10098	ko00944	C10098	-
Lmmn004912	UPLC-MS/MS	315.05	271.02	-	-	316.058	C16H12O7	[M-H]-	3-O-Methylquercetin	3-O-甲基槲皮素	Flavonoids	黄酮	Flavonols	黄酮醇	1486-70-0	1	-	-	-	2.78147e+06	2.70714e+06	2.57102e+06	945529	1.00161e+06	960361	1.54841e+06	1.52277e+06	1.25381e+06	1.52247e+06	1.82692e+06	1.55685e+06	C04443	ko00944,ko01110	C04443	-
Lmzn001894	UPLC-MS/MS	461.07	285.04	-	-	462.08	C21H18O12	[M-H]-	Kaempferol-3-O-glucuronide*	山柰酚-3-O-葡萄糖醛酸苷*	Flavonoids	黄酮	Flavonols	黄酮醇	22688-78-4	1	-	-	-	449998	465479	364926	3.75989e+06	2.93978e+06	4.01712e+06	5.73021e+07	6.43724e+07	6.54354e+07	3.00274e+07	4.12741e+07	3.1726e+07	-	-	CM00466	MetMap114
mws0988	UPLC-MS/MS	315.05	165.04	-	-	316.058	C16H12O7	[M-H]-	Rhamnetin; 3,5,3',4'-Tetrahydroxy-7-Methoxyflavone	鼠李素	Flavonoids	黄酮	Flavonols	黄酮醇	90-19-7	1	-	-	-	176044	171483	127688	443235	453569	499116	3.35321e+07	3.17868e+07	3.13021e+07	1.49549e+07	1.51947e+07	1.36062e+07	C10176	-	C10176	-
Lmjn007168	UPLC-MS/MS	329.07	271.03	-	-	330.074	C17H14O7	[M-H]-	Quercetin-3,3'-dimethyl ether	槲皮素-3,3'-二甲醚	Flavonoids	黄酮	Flavonols	黄酮醇	4382-17-6	1	-	-	-	2.01911e+06	2.24117e+06	2.02113e+06	3.70037e+06	3.65898e+06	4.10282e+06	1.69908e+07	1.71836e+07	1.52276e+07	8.88311e+06	8.96591e+06	8.00441e+06	-	-	-	-
mws0038	UPLC-MS/MS	313.07	283.02	-	-	314.079	C17H14O6	[M-H]-	5,4'-Dihydroxy-3,7-dimethoxyflavone(Kumatakenin)*	5,4'-二羟基-3,7-二甲氧基黄酮(华良姜素,熊竹素)*	Flavonoids	黄酮	Flavonols	黄酮醇	3301-49-3	1	-	-	-	4663.36	10865.2	8425.79	208254	264441	289021	3.78152e+06	3.65316e+06	4.0023e+06	1.96371e+06	1.70212e+06	1.78534e+06	-	-	-	-
Lmgn009690	UPLC-MS/MS	313.07	255.03	-	-	314.079	C17H14O6	[M-H]-	3,5-Dihydroxy-7,4'-dimethoxyflavone	3,5-二羟基-7,4'-二甲氧基黄酮	Flavonoids	黄酮	Flavonols	黄酮醇	15486-33-6	1	-	-	-	250744	280046	181311	4.01972e+06	4.55852e+06	4.57456e+06	8.6462e+07	8.71328e+07	9.10741e+07	4.48978e+07	4.70131e+07	4.39109e+07	-	-	-	-
Hmln002199	UPLC-MS/MS	505.1	300.03	-	-	506.106	C23H22O13	[M-H]-	Quercetin-3-O-(6''-O-acetyl)galactoside	槲皮素-3-O-(6''-O-乙酰)半乳糖苷	Flavonoids	黄酮	Flavonols	黄酮醇	-	2	-	-	-	329781	483993	459814	955250	801610	1.18682e+06	3.35662e+06	2.35719e+06	2.5259e+06	1.6637e+06	2.03188e+06	1.86449e+06	-	-	-	-
Zbjn006482	UPLC-MS/MS	461.11	299.06	-	-	462.116	C22H22O11	[M-H]-	Kaempferide-3-O-glucoside	山柰素-3-O-葡萄糖苷	Flavonoids	黄酮	Flavonols	黄酮醇	-	2	-	-	-	57117.1	57117.1	57117.1	285585	318392	319571	2.70345e+06	2.89312e+06	2.80842e+06	1.73595e+06	1.73643e+06	1.72203e+06	-	-	CM00469	MetMap114
pmn001642	UPLC-MS/MS	503.08	459.1	-	-	504.09	C23H20O13	[M-H]-	Kaempferol-3-O-(2''-O-acetyl)glucuronide	山柰酚-3-O-(2''-O-乙酰)葡萄糖醛酸苷	Flavonoids	黄酮	Flavonols	黄酮醇	-	2	-	-	-	640114	876892	732724	3.13303e+06	3.44045e+06	4.16254e+06	6.35794e+06	6.17115e+06	1.05225e+07	4.51917e+06	4.70669e+06	4.03102e+06	-	-	CM00474	MetMap114
Lmmn003398	UPLC-MS/MS	489.11	285.04	-	-	490.111	C23H22O12	[M-H]-	Kaempferol-3-O-(6''-O-acetyl)glucoside	山柰酚-3-O-(6''-O-乙酰)葡萄糖苷	Flavonoids	黄酮	Flavonols	黄酮醇	-	3	-	-	-	192732	143983	128264	741624	964617	767944	3.68344e+06	2.98877e+06	2.21345e+06	1.85657e+06	1.66266e+06	1.68e+06	-	-	CM00473	MetMap113
Lmfn005486	UPLC-MS/MS	365	285.04	-	-	366.005	C15H10O9S	[M-H]-	Kaempferol-3-O-sulfonate	山柰酚-3-O-磺酸	Flavonoids	黄酮	Flavonols	黄酮醇	-	3	-	-	-	2882.6	2882.6	2882.6	14413	20759.7	15198.7	243720	183849	235857	100874	102816	92985.8	-	-	CM00458	MetMap114
HJN051	UPLC-MS/MS	623.16	315.05	-	-	624.169	C28H32O16	[M-H]-	Tamarixetin-3-O-rutinoside	柽柳黄素-3-O-芸香糖苷	Flavonoids	黄酮	Flavonols	黄酮醇	-	3	-	-	-	194490	154099	185348	301456	308239	280791	762015	721265	691025	313096	212753	322385	-	-	-	-
mws0089	UPLC-MS/MS	447.09	285.04	-	-	448.101	C21H20O11	[M-H]-	Kaempferol-7-O-glucoside*	山柰酚-7-O-葡萄糖苷*	Flavonoids	黄酮	Flavonols	黄酮醇	16290-07-6	2	-	-	-	114623	153955	94569.3	567187	572023	625758	7.67963e+06	8.26431e+06	8.51424e+06	6.65248e+06	6.39105e+06	6.61849e+06	-	-	CM00462	MetMap114
Lmyn006227	UPLC-MS/MS	269.05	151	-	-	270.053	C15H10O5	[M-H]-	Galangin (3,5,7-Trihydroxyflavone)	高良姜素 (3,5,7-三羟基黄酮)	Flavonoids	黄酮	Flavonols	黄酮醇	548-83-4	2	-	-	-	1.47859e+06	2.01844e+06	1.7669e+06	384421	421071	479444	222628	245459	207718	1.65871e+06	1.67454e+06	2.05429e+06	C10044	ko00941	C10044	-
mws1290	UPLC-MS/MS	593.13	285.04	-	-	594.137	C30H26O13	[M-H]-	Kaempferol-3-O-(6''-p-Coumaroyl)glucoside (Tiliroside)	山柰酚-3-O-(6''-对香豆酰)葡萄糖苷 (银锻苷)	Flavonoids	黄酮	Flavonols	黄酮醇	20316-62-5	3	-	-	-	7348.18	7348.18	36740.9	416189	465741	505520	2.91679e+06	3.18769e+06	3.11859e+06	1.52885e+06	1.59205e+06	1.30184e+06	C17140	-	C17140	MetMap113
mws0913	UPLC-MS/MS	447.09	285.04	-	-	448.101	C21H20O11	[M-H]-	Kaempferol-3-O-galactoside (Trifolin)*	山柰酚-3-O-半乳糖苷(三叶豆苷)*	Flavonoids	黄酮	Flavonols	黄酮醇	23627-87-4	2	-	-	-	126317	157591	121113	585927	745830	531634	1.55297e+07	2.64586e+07	1.45248e+07	6.54061e+06	6.89679e+06	6.49716e+06	C12626	ko00944,ko01110	C12626	MetMap113
pme3514	UPLC-MS/MS	301.04	151	-	-	302.043	C15H10O7	[M-H]-	Morin*	桑色素*	Flavonoids	黄酮	Flavonols	黄酮醇	480-16-0	3	-	-	-	24691.3	31124.3	20200	4040.01	4040.01	4040.01	79229.7	82860	54079	66532.2	58669.4	43556.5	C10105	-	C10105	-
mws0061	UPLC-MS/MS	463.09	300.03	-	-	464.096	C21H20O12	[M-H]-	Quercetin-3-O-galactoside (Hyperin)	槲皮素-3-O-半乳糖苷 (金丝桃苷)	Flavonoids	黄酮	Flavonols	黄酮醇	482-36-0	3	-	-	-	461039	320928	425072	1.77411e+06	1.79278e+06	1.58438e+06	6.0889e+06	6.97922e+06	6.89765e+06	5.71304e+06	3.06531e+06	3.54553e+06	C10073	-	C10073	-
mws1329	UPLC-MS/MS	463.09	301.04	-	-	464.096	C21H20O12	[M-H]-	Quercetin-7-O-glucoside	槲皮素-7-O-葡萄糖苷	Flavonoids	黄酮	Flavonols	黄酮醇	491-50-9	3	-	-	-	274294	318505	290651	1.1555e+06	927908	1.60303e+06	3.24614e+06	3.29878e+06	4.07494e+06	3.65123e+06	1.81146e+06	2.41676e+06	C12639	-	C12639	-
mws0856	UPLC-MS/MS	463.09	301.04	-	-	464.096	C21H20O12	[M-H]-	Quercetin-4'-O-glucoside (Spiraeoside)*	槲皮素-4'-O-葡萄糖苷 (绣线菊苷)*	Flavonoids	黄酮	Flavonols	黄酮醇	20229-56-5	3	-	-	-	270792	279752	253111	1.09248e+06	1.16601e+06	1.37336e+06	3.06773e+06	4.02114e+06	4.94285e+06	3.02839e+06	2.11016e+06	2.50363e+06	-	-	-	-
Lmfn003760	UPLC-MS/MS	477.07	301.04	-	-	478.075	C21H18O13	[M-H]-	Quercetin-4'-O-glucuronide*	槲皮素-4'-O-葡萄糖醛酸苷*	Flavonoids	黄酮	Flavonols	黄酮醇	201463-36-7	3	-	-	-	12367.3	12367.3	12367.3	79853.3	69770.6	61836.3	429255	356696	337083	320819	253755	290147	-	-	-	-
Lmpn006208	UPLC-MS/MS	461.11	315.052	-	-	462.116	C22H22O11	[M-H]-	8-Methoxykaempferol-7-O-rhamnoside	8-甲氧基山柰酚-7-O-鼠李糖苷	Flavonoids	黄酮	Flavonols	黄酮醇	-	3	-	-	-	1.3323e+06	1.38609e+06	1.40411e+06	1.00446e+06	930793	1.12858e+06	185642	200347	186365	749344	858569	748360	-	-	CM00468	MetMap114
Zbsn007580	UPLC-MS/MS	345.062	330.038	-	-	346.069	C17H14O8	[M-H]-	Syringetin; 3,5,7,4'-Tetrahydroxy-3',5'-dimethoxyflavone	丁香亭; 3,5,7,4'-四羟基-3',5'-二甲氧基黄酮	Flavonoids	黄酮	Flavonols	黄酮醇	4423-37-4	3	-	-	-	9229.23	9229.23	9229.23	56116.7	46146.1	52357.3	291054	272972	295229	157050	176658	144189	C11620	ko00944,ko01110	C11620	-
mws0855	UPLC-MS/MS	317.03	139.003	-	-	318.038	C15H10O8	[M-H]-	Gossypetin(3,3',4',5,7,8-Hexahydroxyflavone)	棉黄素	Flavonoids	黄酮	Flavonols	黄酮醇	489-35-0	3	-	-	-	290049	386682	272388	1.11828e+06	1.06624e+06	1.14801e+06	3.21547e+06	3.31777e+06	3.1451e+06	1.5708e+06	1.8868e+06	1.41559e+06	C04109	-	C04109	-
Zbjn004215	UPLC-MS/MS	609.145	285.039	-	-	610.154	C27H30O16	[M-H]-	Kaempferol-3-O-sophoroside	山柰酚-3-O-槐糖苷 (槐属黄酮苷)	Flavonoids	黄酮	Flavonols	黄酮醇	19895-95-5	3	-	-	-	2685.88	2685.88	2685.88	2685.88	2685.88	13429.4	30218.6	2685.88	2685.88	14542.9	22371.2	14542.9	C12634	ko00944,ko01110	C12634	MetMap113
pme1605	UPLC-MS/MS	593.151	285.039	-	-	594.159	C27H30O15	[M-H]-	Kaempferol-3-O-robinobioside(Biorobin)	山柰酚-3-O-洋槐糖苷	Flavonoids	黄酮	Flavonols	黄酮醇	17297-56-2	3	-	-	-	60506.1	61871.5	117505	224533	150080	183818	459525	379258	450224	217930	271065	282700	-	-	CM00490	MetMap113
Cmsp007228	UPLC-MS/MS	303.09	167.03	-	-	302.079	C16H14O6	[M+H]+	7-O-Methyleriodictyol	7-氧-甲基圣草素	Flavonoids	黄酮	Flavanols	黄烷醇类	51857-11-5	1	-	-	-	282535	273206	302145	4.00408e+06	3.90226e+06	4.33855e+06	3.89576e+07	3.74682e+07	3.7225e+07	1.99378e+07	2.1668e+07	1.95405e+07	-	-	-	-
Lahp002857	UPLC-MS/MS	595.15	409.09	-	-	594.137	C30H26O13	[M+H]+	Epicatechin-(4β→8)-epigallocatechin	表儿茶素-(4β→8)-表没食子儿茶素	Flavonoids	黄酮	Flavanols	黄烷醇类	-	2	-	-	-	135946	135946	135946	679732	830590	736529	1.19746e+07	1.02606e+07	1.2266e+07	4.97979e+06	4.68672e+06	5.41771e+06	-	-	-	-
Lmmp000897	UPLC-MS/MS	611.14	287.05	-	-	610.132	C30H26O14	[M+H]+	Gallocatechin-(4α→8)-gallocatechin	没食子儿茶素-(4α→8)-没食子儿茶素	Flavonoids	黄酮	Flavanols	黄烷醇类	-	3	-	-	-	81792.1	76755.4	85832.8	58559.1	59590.3	58636.4	607829	610858	679626	261515	291754	245318	-	-	-	-
pmn001527	UPLC-MS/MS	487.18	124	-	-	488.189	C22H32O12	[M-H]-	Di-O-galloyl Methyl gallate	二-O-没食子酸甲酯	Flavonoids	黄酮	Flavanols	黄烷醇类	-	3	-	-	-	53577.3	48627.3	52679.8	2599.17	2599.17	2599.17	2599.17	2599.17	2599.17	26792.3	12995.8	27163.5	-	-	-	-
Smcn001567	UPLC-MS/MS	607.22	179.06	-	-	608.232	C26H40O16	[M-H]-	Leonoside E	Leonoside E	Phenolic acids	酚酸类	Phenolic acids	酚酸类	-	3	-	-	-	49585.2	63264.2	113254	68811	73870.9	96280.9	289391	397546	331567	117873	126842	110295	-	-	-	-
Wcjp002598	UPLC-MS/MS	146.06	91.05	-	-	145.053	C9H7NO	[M+H]+	8-hydroxyquinoline	8-羟基喹啉	Alkaloids	生物碱	Quinoline alkaloids	喹啉类生物碱	148-24-3	1	-	-	-	87261.2	91147.3	78674.6	1.42885e+06	1.51578e+06	1.59974e+06	143591	141760	105944	342699	455629	458746	C19434	-	C19434	-
Lahp002608	UPLC-MS/MS	188.07	118.07	-	-	187.063	C11H9NO2	[M+H]+	3,5-Dihydro-2H-Furo[3,2-C]Quinolin-4-One*	3,5-二氢-2H-呋喃[3,2-C]喹啉-4-酮*	Alkaloids	生物碱	Quinoline alkaloids	喹啉类生物碱	-	1	-	-	-	1.16552e+07	1.09039e+07	1.1456e+07	1.2159e+08	1.16396e+08	1.17025e+08	1.32301e+07	1.33823e+07	1.1265e+07	5.17544e+07	6.5504e+07	6.27277e+07	-	-	-	-
Ladp002935	UPLC-MS/MS	190.05	144.04	-	-	189.043	C10H7NO3	[M+H]+	3-quinolinecarboxylic acid	3-喹啉羧酸	Alkaloids	生物碱	Quinoline alkaloids	喹啉类生物碱	-	1	-	-	-	84803.4	92608.9	72860.1	228889	187230	225811	8.27285e+06	8.57396e+06	7.29633e+06	2.19088e+06	2.66745e+06	2.29459e+06	-	-	-	-
Ladp002110	UPLC-MS/MS	206.04	160.04	-	-	205.037	C10H7NO4	[M+H]+	4-hydroxy-2-oxo-1,2-dihydroquinoline-3-carboxylic acid	4-羟基-2-氧代-1,2-二氢喹啉-3-羧酸	Alkaloids	生物碱	Quinoline alkaloids	喹啉类生物碱	73776-24-6	2	-	-	-	657004	711050	612487	4.66428e+06	5.12556e+06	5.14475e+06	5.74464e+06	5.71654e+06	5.6927e+06	2.72455e+06	3.09591e+06	3.20674e+06	-	-	-	-
NK10246260	UPLC-MS/MS	162.06	116.05	-	-	161.048	C9H7NO2	[M+H]+	2,4-Dihydroxyquinoline	2,4-二羟基喹啉	Alkaloids	生物碱	Quinoline alkaloids	喹啉类生物碱	86-95-3	3	-	-	-	68625.1	111382	84546	158177	155850	147689	69790.5	79095.6	103519	111674	90728	66307.5	C16716	ko00996	C16716	-
Wasn002329	UPLC-MS/MS	366.08	160.04	-	-	367.09	C16H17NO9	[M-H]-	Xanthurenic Acid 8-O-Glucoside	4,8 二羟基喹啉甲酸 8-O-葡糖苷	Alkaloids	生物碱	Quinoline alkaloids	喹啉类生物碱	97451-32-6	1	-	-	-	1.33286e+06	1.76328e+06	2.11299e+06	9.01058e+06	1.02612e+07	9.8298e+06	1.22931e+07	1.3202e+07	1.15912e+07	8.05929e+06	8.39414e+06	8.76732e+06	-	-	-	-
MA10074217	UPLC-MS/MS	144.05	115.04	-	-	145.053	C9H7NO	[M-H]-	4-Hydroxyquinoline	4-羟基喹啉	Alkaloids	生物碱	Quinoline alkaloids	喹啉类生物碱	611-36-9	3	-	-	-	43600.8	42651.4	39806.9	97608.6	105187	103197	53971.4	54965	71078	134548	122246	113705	C06343	-	C06343	-
Zmsp001834	UPLC-MS/MS	169.05	65	-	-	168.042	C8H8O4	[M+H]+	2,6-Dimethoxy-1,4-benzoquinone*	2,6-二甲氧基-1,4-苯醌*	Quinones	醌类	Quinones	醌类	530-55-2	1	-	-	-	595049	553633	594962	288893	281762	315274	1.99714e+06	2.10897e+06	2.10574e+06	973252	1.03048e+06	1.12171e+06	C10331	-	C10331	-
Wmhp000055	UPLC-MS/MS	169.05	65.04	-	-	168.042	C8H8O4	[M+H]+	2,5-Dimethoxybenzoquinone*	2,5-二甲氧基苯醌*	Quinones	醌类	Quinones	醌类	3117-03-1	1	-	-	-	600248	563275	572552	390985	401542	428358	1.98225e+06	1.98354e+06	2.05498e+06	1.02484e+06	1.06427e+06	996747	-	-	-	-
Zbzn008048	UPLC-MS/MS	293.18	221.15	-	-	294.183	C17H26O4	[M-H]-	Embelin	酸藤子酚	Quinones	醌类	Quinones	醌类	550-24-3	1	-	-	-	166656	293862	170547	293896	227778	211075	150611	178250	172860	166158	176888	143691	-	-	-	-
mws0120	UPLC-MS/MS	258.11	104.11	-	-	257.103	C8H20NO6P	[M+H]+	Choline Alfoscerate	甘磷酸胆碱 GPC	Lipids	脂质	PC	磷脂酰胆碱	28319-77-9	3	-	-	-	2.54258e+06	2.69796e+06	2.80403e+06	1.98793e+06	1.8824e+06	1.66888e+06	1.84683e+06	1.76522e+06	1.69698e+06	1.94963e+06	1.90572e+06	1.95971e+06	C00670	ko00564,ko00565	C00670	-
MWSHC20189	UPLC-MS/MS	357.13	151.04	-	-	358.142	C20H22O6	[M-H]-	Epipinoresinol*	表松脂醇*	Lignans and Coumarins	木脂素和香豆素	Lignans	木脂素	24404-50-0	2	-	-	-	52599.4	65428.7	77730.8	87657.3	93790.7	68958	91045.4	98477.5	86089.1	54885.7	91504.1	78546.9	-	-	-	-
MWS20158	UPLC-MS/MS	683.25	341.14	-	-	682.247	C32H42O16	[M+H]+	Pinoresinol-4,4'-O-diglucoside	松脂醇-4,4'-O-二葡萄糖苷	Lignans and Coumarins	木脂素和香豆素	Lignans	木脂素	63902-38-5	3	-	-	-	111110	167671	126239	37371.9	43430.9	45459.1	75945.5	51513.6	64637.4	66669.1	80793.7	55548.9	-	-	-	-
Lhmp121004	UPLC-MS/MS	521.2	131.05	-	-	520.194	C26H32O11	[M+H]+	Symplocosin*	Symplocosin*	Lignans and Coumarins	木脂素和香豆素	Lignans	木脂素	11042-30-1	1	-	-	-	2.13543e+06	2.54874e+06	2.32837e+06	2.06949e+06	2.12944e+06	2.22875e+06	812709	820127	667630	1.43833e+06	1.77394e+06	1.26131e+06	-	-	-	-
Sakn005461	UPLC-MS/MS	519.19	339.12	-	-	520.194	C26H32O11	[M-H]-	alaschanioside C	alaschanioside C	Lignans and Coumarins	木脂素和香豆素	Lignans	木脂素	157543-21-0	3	-	-	-	1.78597e+06	1.32982e+06	1.32982e+06	2.28727e+06	1.88962e+06	1.68892e+06	670120	710875	697451	1.10745e+06	2.14383e+06	980577	-	-	-	-
Wbwn004173	UPLC-MS/MS	499.24	307.17	-	-	500.241	C28H36O8	[M-H]-	Heteroclitin A	异型南五味子素 A	Lignans and Coumarins	木脂素和香豆素	Lignans	木脂素	140369-75-1	3	-	-	-	147058	154855	160423	7.24553e+06	7.25922e+06	7.41929e+06	2.5374e+06	2.29564e+06	2.50499e+06	2.73524e+06	3.27802e+06	2.86983e+06	-	-	-	-
WaYn002469	UPLC-MS/MS	409.15	165.06	-	-	410.158	C20H26O9	[M-H]-	4',8''-Bisguaiacylglycerol*	4',8''-Bisguaiacylglycerol*	Lignans and Coumarins	木脂素和香豆素	Lignans	木脂素	-	3	-	-	-	3.0455e+06	3.73247e+06	4.35046e+06	3.23659e+06	3.20383e+06	3.06041e+06	542603	463120	481711	2.15879e+06	2.06721e+06	2.31554e+06	-	-	-	-
Lazn002213	UPLC-MS/MS	409.15	165.06	-	-	410.158	C20H26O9	[M-H]-	1-(4-Hydroxy-3-methoxyphenyl)-2-[4-(1,2,3-trihydroxypropyl)-2-methoxyphenoxy]-1,3-propanediol*	1-(4-Hydroxy-3-methoxyphenyl)-2-[4-(1,2,3-trihydroxypropyl)-2-methoxyphenoxy]-1,3-propanediol*	Lignans and Coumarins	木脂素和香豆素	Lignans	木脂素	-	3	-	-	-	2.71885e+06	3.39826e+06	3.41433e+06	2.84987e+06	2.87899e+06	2.73485e+06	372076	350301	396117	1.94844e+06	1.89429e+06	1.90338e+06	-	-	-	-
MWSHC2023	UPLC-MS/MS	355.1	193.06	-	-	356.111	C16H20O9	[M-H]-	Caffeic Acid 4-O-Glucoside	咖啡酸-4-O-葡萄糖苷	Phenolic acids	酚酸类	Phenolic acids	酚酸类	499-21-8	2	-	-	-	2.28995e+06	2.78036e+06	2.80721e+06	9.04472e+06	1.0408e+07	9.67835e+06	1.51234e+07	1.29308e+07	1.2253e+07	8.75291e+06	9.02819e+06	8.72714e+06	-	-	-	-
Cmdn004237	UPLC-MS/MS	785.25	623.2	-	-	786.258	C35H46O20	[M-H]-	Betonyoside E*	Betonyoside E*	Phenolic acids	酚酸类	Phenolic acids	酚酸类	181301-30-4	2	-	-	-	1.42771e+06	1.91011e+06	2.39237e+06	1.67002e+06	1.48903e+06	1.51644e+06	820467	565382	508398	1.44174e+06	1.12939e+06	1.1144e+06	-	-	-	-
Lmsp003655	UPLC-MS/MS	521.2	131.05	-	-	520.194	C26H32O11	[M+H]+	Dehydrodiconiferyl alcohol-gamma'-O-glucoside*	脱氢双松柏醇-γ'-O-葡萄糖苷*	Lignans and Coumarins	木脂素和香豆素	Lignans	木脂素	-	1	-	-	-	3.24789e+06	2.88498e+06	2.65637e+06	2.55705e+06	2.71976e+06	3.07996e+06	931973	926843	832384	1.85846e+06	2.0527e+06	1.75587e+06	-	-	-	-
Sazp004372	UPLC-MS/MS	371.15	167.07	-	-	370.142	C21H22O6	[M+H]+	Bursehernin*	裂榄脂素*	Lignans and Coumarins	木脂素和香豆素	Lignans	木脂素	-	1	-	-	-	7.19524e+06	7.85889e+06	4.23635e+06	6.37209e+06	7.16241e+06	6.69931e+06	951067	769262	918789	4.064e+06	4.23098e+06	4.47083e+06	-	-	-	-
Smfn005554	UPLC-MS/MS	343.08	197.04	-	-	344.09	C18H16O7	[M-H]-	clinopodic acid A	clinopodic acid A	Phenolic acids	酚酸类	Phenolic acids	酚酸类	145757-61-5	3	-	-	-	62059.3	87710.4	55194.4	458910	529806	531465	511494	567356	511200	389400	356438	357449	-	-	-	-
Wbwp006397	UPLC-MS/MS	357.13	307.1	-	-	356.126	C20H20O6	[M+H]+	(3r,4r)-3-(2h-1,3-benzodioxol-5-ylmethyl)-4-[(4-hydroxy-3-methoxyphenyl)methyl]oxolan-2-one*	(3r,4r)-3-(2h-1,3-苯并二氧戊醇-5-基甲基)-4-[(4-羟基-3-甲氧基苯基)甲基]氧代烷-2-酮*	Lignans and Coumarins	木脂素和香豆素	Lignans	木脂素	-	2	-	-	-	414560	392240	439373	206382	238548	226606	33688.7	37920	29495.2	164885	174512	194672	-	-	-	-
Lskp211385	UPLC-MS/MS	357.13	307.09	-	-	356.126	C20H20O6	[M+H]+	dihydrosesamin*	双氢芝麻脂素*	Lignans and Coumarins	木脂素和香豆素	Lignans	木脂素	-	2	-	-	-	516241	450193	531457	276777	272699	281222	42131.6	41530.4	36708.3	178724	241305	223882	-	-	-	-
Zmgp003492	UPLC-MS/MS	373.12	105.03	-	-	372.121	C20H20O7	[M+H]+	8-Hydroxy-α-conidendrin	8-羟基-α-铁杉脂素	Lignans and Coumarins	木脂素和香豆素	Lignans	木脂素	-	2	-	-	-	13364.2	13364.2	13364.2	79964.8	96401.4	100775	88728.6	74490.3	100778	78894.6	106256	66820.8	-	-	-	-
Lskp211249	UPLC-MS/MS	387.18	137.06	-	-	386.173	C22H26O6	[M+H]+	epieudesmin	表桉叶明	Lignans and Coumarins	木脂素和香豆素	Lignans	木脂素	-	2	-	-	-	511925	448905	575285	1.48807e+06	1.72311e+06	1.87237e+06	699089	608796	521379	997780	899751	998917	-	-	-	-
Lhhp102922	UPLC-MS/MS	371.15	167.07	-	-	370.142	C21H22O6	[M+H]+	Fargesin*	辛夷脂素*	Lignans and Coumarins	木脂素和香豆素	Lignans	木脂素	31008-19-2	1	-	-	-	2.4901e+06	2.91859e+06	3.86147e+06	4.95877e+06	3.49602e+06	3.76663e+06	284467	247830	284544	1.87592e+06	2.07256e+06	1.55991e+06	C16957	-	C16957	-
Hmlp002744	UPLC-MS/MS	375.14	137.06	-	-	374.137	C20H22O7	[M+H]+	Nortrachelogenin	去甲络石苷元	Lignans and Coumarins	木脂素和香豆素	Lignans	木脂素	34444-37-6	2	-	-	-	1.05376e+06	1.09132e+06	907811	524143	565312	565311	44781.9	44781.9	44781.9	223910	291561	242456	C10725	-	C10725	-
Lssp210087	UPLC-MS/MS	359.15	137.06	-	-	358.142	C20H22O6	[M+H]+	Matairesinol	罗汉松树脂醇	Lignans and Coumarins	木脂素和香豆素	Lignans	木脂素	580-72-3	2	-	-	-	365728	324691	685761	706472	347388	592000	149702	156313	110592	118704	225984	267965	C10682	ko00999,ko01100,ko01110	C10682	-
Cmsp003083	UPLC-MS/MS	521.2	131.05	-	-	520.194	C26H32O11	[M+H]+	Dehydrodiconiferyl alcohol-4-O-glucoside*	脱氢双松柏醇-4-O-葡萄糖苷*	Lignans and Coumarins	木脂素和香豆素	Lignans	木脂素	107870-88-2	1	-	-	-	1.13609e+06	1.23382e+06	1.33497e+06	302352	290041	311412	121106	118056	123186	441819	422475	466251	-	-	-	-
Lasp006411	UPLC-MS/MS	387.11	191.07	-	-	386.1	C20H18O8	[M+H]+	5'-Demethylaquillochin	5'-去甲基沉香木质素	Lignans and Coumarins	木脂素和香豆素	Lignans	木脂素	305364-91-4	2	-	-	-	282009	619300	339625	983871	1.605e+06	941127	542671	450245	437741	586524	523911	932812	-	-	-	-
Lmsp004450	UPLC-MS/MS	359.15	131.05	-	-	358.142	C20H22O6	[M+H]+	Dehydrodiconiferyl alcohol	脱氢双松柏醇	Lignans and Coumarins	木脂素和香豆素	Lignans	木脂素	4263-87-0	3	-	-	-	140924	229501	284003	282582	264998	339814	132019	79954.2	87631.4	176270	170735	251858	-	-	-	-
Rfmb26201	UPLC-MS/MS	621.22	417.16	-	-	622.226	C30H38O14	[M-H]-	Syringaresinol-4'-O-(6''-acetyl)glucoside	丁香树脂酚-4'-O-(6''-乙酰)葡萄糖苷	Lignans and Coumarins	木脂素和香豆素	Lignans	木脂素	-	2	-	-	-	1.4007e+07	1.25704e+07	1.49089e+07	8.73202e+06	9.01488e+06	7.66309e+06	1.86511e+06	1.64213e+06	1.61033e+06	8.78476e+06	9.74904e+06	7.39806e+06	-	-	-	-
Rfmb25702	UPLC-MS/MS	561.2	357.13	-	-	562.205	C28H34O12	[M-H]-	Pinoresinol-4-O-(6''-acetyl)glucoside	松脂醇-4-O-(6''-乙酰)葡萄糖苷	Lignans and Coumarins	木脂素和香豆素	Lignans	木脂素	-	2	-	-	-	2.15069e+06	2.02773e+06	1.61769e+06	1.37457e+06	1.19054e+06	1.31283e+06	671780	707857	571478	1.17368e+06	1.26012e+06	1.25435e+06	-	-	-	-
Hmgn004139	UPLC-MS/MS	373.13	329.05	-	-	374.137	C20H22O7	[M-H]-	Isohydroxymatairesinol	异羟基罗汉松脂醇	Lignans and Coumarins	木脂素和香豆素	Lignans	木脂素	-	2	-	-	-	2.76967e+06	2.71129e+06	2.33641e+06	2.47146e+06	2.4532e+06	2.47245e+06	87077.1	90016.7	83826	1.27629e+06	1512451	1.22084e+06	-	-	-	-
Zmcn003729	UPLC-MS/MS	535.18	373.13	-	-	536.189	C26H32O12	[M-H]-	1-Hydroxypinoresinol-4'-O-Glucoside	1-羟基松脂醇-4'-O-葡萄糖苷	Lignans and Coumarins	木脂素和香豆素	Lignans	木脂素	-	3	-	-	-	597433	768291	664218	745969	635253	733522	211295	167354	163633	274069	478375	496868	-	-	-	-
Lmmn002260	UPLC-MS/MS	551.21	389.17	-	-	552.221	C27H36O12	[M-H]-	5'-Methoxyisolariciresinol-9'-O-glucoside	5'-甲氧基异落叶松脂醇-9'-O-葡萄糖苷	Lignans and Coumarins	木脂素和香豆素	Lignans	木脂素	-	3	-	-	-	685204	1.53036e+06	786704	1.32801e+06	1.06997e+06	1.27573e+06	368032	398983	446806	817497	556203	702942	-	-	-	-
Zmdn003480	UPLC-MS/MS	537.2	375.15	-	-	538.205	C26H34O12	[M-H]-	Cycloolivil-6-O-glucoside	环橄榄树脂素-6-O-葡萄糖苷	Lignans and Coumarins	木脂素和香豆素	Lignans	木脂素	-	3	-	-	-	803285	985056	931720	1.13239e+06	1.06541e+06	1.08447e+06	63564.3	51210.2	43896.3	566299	615435	541369	-	-	-	-
Lmyn003971	UPLC-MS/MS	521.2	359.15	-	-	522.21	C26H34O11	[M-H]-	Dihydrodehydrodiconiferyl alcohol-4-O-glucoside*	二氢脱氢双松柏醇-4-O-葡萄糖苷*	Lignans and Coumarins	木脂素和香豆素	Lignans	木脂素	-	3	-	-	-	1.30111e+06	1.72181e+06	1.13034e+06	492410	439053	515734	100143	112126	113175	476974	480713	453285	-	-	-	-
Rfmb056	UPLC-MS/MS	591.21	387.14	-	-	592.216	C29H36O13	[M-H]-	Medioresinol-4'-O-(6'''-acetyl)glucoside	杜仲树脂酚-4'-O-(6'''-乙酰)葡萄糖苷	Lignans and Coumarins	木脂素和香豆素	Lignans	木脂素	-	3	-	-	-	2.35789e+06	2.57195e+06	2.74869e+06	2.33748e+06	2.00557e+06	2.22017e+06	387181	376393	371701	1.66052e+06	1.89609e+06	1.44296e+06	-	-	-	-
Wbwn009556	UPLC-MS/MS	329.17	314.15	-	-	330.183	C20H26O4	[M-H]-	4-[4-(4-hydroxy-3-methoxyphenyl)-2,3-dimethylbutyl]-2-methoxyphenol	4-[4-(4-羟基-3-甲氧基苯基)-2,3-二甲基丁基]-2-甲氧基苯酚	Lignans and Coumarins	木脂素和香豆素	Lignans	木脂素	36469-60-0	2	-	-	-	1.3324e+06	1.12503e+06	1.42824e+06	332899	439293	392452	531174	783476	893264	775211	844620	729015	-	-	-	-
mws0097	UPLC-MS/MS	357.13	151.04	-	-	358.142	C20H22O6	[M-H]-	Pinoresinol*	松脂醇*	Lignans and Coumarins	木脂素和香豆素	Lignans	木脂素	487-36-5	2	-	-	-	41753.9	48696.3	43380.4	80440.6	84797.4	72093.6	101818	87714	105457	60802.6	78275.4	59182.9	C05366	ko00999,ko01100,ko01110	C05366	-
WaYn003112	UPLC-MS/MS	439.16	195.07	-	-	440.168	C21H28O10	[M-H]-	Erythro-Guaiacylglycerol-β-threo-syringylglycerol Ether	赤式-愈创木基甘油-β-苏式-丁香酰甘油醚	Lignans and Coumarins	木脂素和香豆素	Lignans	木脂素	1313434-74-0	2	-	-	-	879033	977475	918497	1.42148e+06	1.48703e+06	1.54749e+06	258369	227743	249581	551365	614637	554272	-	-	-	-
MWSprf094	UPLC-MS/MS	549.2	387.14	-	-	550.205	C27H34O12	[M-H]-	Tracheloside*	络石苷*	Lignans and Coumarins	木脂素和香豆素	Lignans	木脂素	33464-71-0	2	-	-	-	429424	770781	566200	2.20622e+06	2.1677e+06	2.0333e+06	3.21969e+06	4.07647e+06	3.44637e+06	2.51782e+06	2.60082e+06	2.12087e+06	-	-	-	-
Hmln002355	UPLC-MS/MS	549.2	387.15	-	-	550.205	C27H34O12	[M-H]-	5'-Methoxymatairesinoside*	5'-甲氧基罗汉松脂苷*	Lignans and Coumarins	木脂素和香豆素	Lignans	木脂素	1691201-82-7	2	-	-	-	407076	574587	410161	2.13712e+06	2.3041e+06	2.09782e+06	3.27256e+06	3.59835e+06	2.8988e+06	2.27903e+06	2.96207e+06	1.81278e+06	-	-	-	-
Cmmn005231	UPLC-MS/MS	391.14	59.01	-	-	392.147	C20H24O8	[M-H]-	Massoniresinol; Vladinol A	马尾松树脂醇	Lignans and Coumarins	木脂素和香豆素	Lignans	木脂素	96087-10-4	2	-	-	-	692074	804994	841137	138415	138415	138415	1.09633e+06	1.36448e+06	1.05878e+06	1.69074e+06	1.52575e+06	1.54638e+06	-	-	-	-
pmn001378	UPLC-MS/MS	519.19	357.14	-	-	520.194	C26H32O11	[M-H]-	Pinoresinol-4-O-glucoside	松脂醇-4-O-葡萄糖苷	Lignans and Coumarins	木脂素和香豆素	Lignans	木脂素	41607-20-9	3	-	-	-	863450	969223	826035	483831	447275	533210	1.09737e+06	959770	1.05272e+06	858986	626090	831345	C17529	-	C17529	-
MWS20152	UPLC-MS/MS	417.16	402.1	-	-	418.163	C22H26O8	[M-H]-	Syringaresinol	丁香树脂酚	Lignans and Coumarins	木脂素和香豆素	Lignans	木脂素	21453-71-4	3	-	-	-	124286	142328	126189	280273	260749	225439	129176	102976	98200.1	158402	157183	159010	C10889	-	C10889	-
Hmgn002833	UPLC-MS/MS	371.11	297.11	-	-	372.121	C20H20O7	[M-H]-	4-Ketopinoresinol	4-酮基松脂酚	Lignans and Coumarins	木脂素和香豆素	Lignans	木脂素	66288-89-9	3	-	-	-	99593.2	97476.6	106040	46660.6	47691	28862.6	43229.8	69996.3	41137.1	67172.4	49790	57275.9	-	-	-	-
Smfn005734	UPLC-MS/MS	373.09	197.04	-	-	374.1	C19H18O8	[M-H]-	clinopodic acid B	clinopodic acid B	Phenolic acids	酚酸类	Phenolic acids	酚酸类	1174920-55-8	3	-	-	-	67285.9	65728.2	66334.4	65731	51704.6	59971.7	4574.63	4574.63	4574.63	57157.1	35252.8	22873.1	-	-	-	-
Lmmn003748	UPLC-MS/MS	359.15	180.08	-	-	360.157	C20H24O6	[M-H]-	Isolariciresinol	异落叶松脂素	Lignans and Coumarins	木脂素和香豆素	Lignans	木脂素	548-29-8	3	-	-	-	6669.38	6669.38	6669.38	6669.38	6669.38	6669.38	144681	134338	118113	33346.9	48261.3	34608.1	-	-	-	-
Lmmn002274	UPLC-MS/MS	521.2	359.15	-	-	522.21	C26H34O11	[M-H]-	Isolariciresinol-9'-O-glucoside*	异落叶松脂素-9'-O-葡萄糖苷*	Lignans and Coumarins	木脂素和香豆素	Lignans	木脂素	63358-12-3	3	-	-	-	1.28077e+06	1.62655e+06	1.44165e+06	502969	470488	617382	120512	107935	114225	448619	357378	329470	-	-	-	-
HJN083	UPLC-MS/MS	521.2	359.15	-	-	522.21	C26H34O11	[M-H]-	Lariciresinol-4'-O-glucoside	落叶松脂素-4'-O-葡萄糖苷	Lignans and Coumarins	木脂素和香豆素	Lignans	木脂素	143663-00-7	3	-	-	-	122332	180392	97715.5	125827	123496	95539.3	59757.7	143717	83246.5	113835	98231	97867	-	-	-	-
pmn001372	UPLC-MS/MS	711.25	549.2	-	-	712.258	C33H44O17	[M-H]-	Medioresinol-4,4'-di-O-glucoside	杜仲树脂酚-4,4'-二-O-葡萄糖苷	Lignans and Coumarins	木脂素和香豆素	Lignans	木脂素	88142-63-6	3	-	-	-	143501	215829	280321	160205	202456	222503	74613.4	55636.1	41177.6	120697	157967	149064	-	-	-	-
Sasn005261	UPLC-MS/MS	343.09	161.03	-	-	344.09	C18H16O7	[M-H]-	Isorinic acid	Isorinic acid	Phenolic acids	酚酸类	Phenolic acids	酚酸类	-	3	-	-	-	49021.3	52343.8	30312.5	205165	119643	154529	4279.47	21397.3	4279.47	38759.8	43674.3	33873.2	-	-	-	-
Zmdn003762	UPLC-MS/MS	533.187	311.114	-	-	534.195	C23H34O14	[M-H]-	Isosyringinoside	异紫丁香酚苷	Lignans and Coumarins	木脂素和香豆素	Lignans	木脂素	152686-85-6	3	-	-	-	106747	194772	187380	79389.2	65973.2	90527.6	34696.1	40258.1	32417.2	91411.2	93027.1	90416.1	-	-	-	-
mws1603	UPLC-MS/MS	741.261	579.207	-	-	742.268	C34H46O18	[M-H]-	Eleutheroside E	刺五加苷 E	Lignans and Coumarins	木脂素和香豆素	Lignans	木脂素	39432-56-9	3	-	-	-	32278.5	41177.6	44508.9	56756	41180.9	41177.6	17307.6	15586.1	24490.9	33390	27828.9	43404	C20786	-	C20786	-
Sasn004359	UPLC-MS/MS	551.12	327.06	-	-	552.127	C28H24O12	[M-H]-	Orthosiphoic Acid D	Orthosiphoic Acid D	Phenolic acids	酚酸类	Phenolic acids	酚酸类	-	3	-	-	-	4878.99	4878.99	59363	84981.3	96651.3	103608	33693	24395	30211.5	32523.1	44138.8	30211.5	-	-	-	-
Cmhp005227	UPLC-MS/MS	339.11	177.05	-	-	338.1	C16H18O8	[M+H]+	4,8-Dihydroxy Naphthol-1-O-glucoside	4,8-二羟基萘酚-1-O-葡萄糖苷	Quinones	醌类	Naphthol	萘酚类	-	1	-	-	-	2.68917e+07	3.34366e+07	3.0001e+07	1.96109e+07	2.09066e+07	2.00277e+07	4.76982e+06	3.94715e+06	6.21425e+06	1.5647e+07	1.71973e+07	1.79493e+07	-	-	-	-
Wchn003984	UPLC-MS/MS	337.1	191.06	-	-	338.1	C16H18O8	[M-H]-	1,4,8-Trihydroxynaphthalene-1-O-glucoside	1,4,8-三羟基萘-1-O-葡萄糖苷	Quinones	醌类	Naphthol	萘酚类	39015-63-9	1	-	-	-	46696.7	59968	115486	277399	282891	320842	113077318	8.7737e+07	8.58203e+07	5.35025e+07	5.04963e+07	6.32028e+07	-	-	-	-
Lmqn005782	UPLC-MS/MS	193.05	133.03	-	-	194.058	C10H10O4	[M-H]-	4,5,8-Trihydroxy-α-tetralone	4,5,8-三羟基-α-四氢萘酮	Quinones	醌类	Naphthol	萘酚类	-	2	-	-	-	1.36254e+06	1.25012e+06	1.19293e+06	311877	321357	328678	1.04263e+06	894347	964177	863015	959421	803258	-	-	-	-
Zbzp011453	UPLC-MS/MS	279.16	149.03	-	-	278.152	C16H22O4	[M+H]+	Des-O-Methyllasiodiplodin	去-O-甲基毛狄泼老素	Others	其它类	Lactones	内酯类化合物	32885-82-8	1	-	-	-	9.02975e+06	9.20714e+06	9.27262e+06	9.32082e+06	9.65358e+06	9.43686e+06	9.93437e+06	1.0726e+07	8.83844e+06	8.69821e+06	9.60788e+06	9.67852e+06	-	-	-	-
Hmjp000461	UPLC-MS/MS	265.08	103.04	-	-	264.084	C10H16O8	[M+H]+	3-O-Glucoside-3-hydroxy-y-butyrolactone	3-O-葡萄糖苷-(S)-3-羟基-γ-丁内酯	Others	其它类	Lactones	内酯类化合物	-	3	-	-	-	330306	450540	365713	139005	129910	128363	454699	532937	530901	296485	285188	268568	-	-	-	-
Cmyp007180	UPLC-MS/MS	181.12	107.09	-	-	180.115	C11H16O2	[M+H]+	Dihydroactinidiolide	二氢猕猴桃内酯	Others	其它类	Lactones	内酯类化合物	17092-92-1	2	-	-	-	55695	50017.2	60921.1	93044.9	103623	119450	467356	468988	495152	227424	186526	231802	-	-	-	-
mws1611	UPLC-MS/MS	191.11	117.07	-	-	190.099	C12H14O2	[M+H]+	Z-Ligustilide	Z-蒿本内酯	Others	其它类	Lactones	内酯类化合物	4431-01-0	3	-	-	-	26334.2	23269.9	28171.8	30394.4	23871.9	31762.3	77006.5	68706.2	73188.3	26300.3	34320.1	37743.7	C16987	-	C16987	-
pmb0128	UPLC-MS/MS	213.18	81.07	-	-	212.178	C13H24O2	[M+H]+	δ-Tridecalactone	δ-十三烷内脂	Others	其它类	Lactones	内酯类化合物	7370-92-5	3	-	-	-	163762	164477	227422	277261	177046	199646	20391.5	20391.5	20391.5	129990	101958	103794	-	-	-	-
Zmcp102201	UPLC-MS/MS	205.086	149.023	-	-	204.079	C12H12O3	[M+H]+	Senkyunolide B*	洋川芎内酯 B*	Others	其它类	Lactones	内酯类化合物	93236-67-0	2	-	-	-	1.65604e+07	1.62576e+07	16511897	1.77059e+07	1.84762e+07	1.81381e+07	2.85038e+07	3.02539e+07	2.81922e+07	2.32819e+07	2.33602e+07	2.24533e+07	C09921	-	C09921	-
Wcfp002357	UPLC-MS/MS	413.14	162.04	-	-	412.134	C15H20N6O8	[M+H]+	N6-Threonylcarbamoyladenosine	N6-苏氨酰氨基甲酰基腺苷	Nucleotides and derivatives	核苷酸及其衍生物	Nucleotides and derivatives	核苷酸及其衍生物	24719-82-2	1	-	-	-	2.67353e+06	2.84868e+06	2.28709e+06	2.38191e+06	2.84561e+06	2.53629e+06	2.43427e+06	2.3956e+06	2.24023e+06	2.15617e+06	2.24432e+06	2.25469e+06	-	-	-	-
Lmxn008846	UPLC-MS/MS	197.12	153.13	-	-	198.126	C11H18O3	[M-H]-	Hydroxydihydrobovolide	羟基二氢博伏内酯	Others	其它类	Lactones	内酯类化合物	6067-11-4	3	-	-	-	18767.7	18926.6	16211	92323.6	101830	108506	129480	97472.9	101059	73653.6	84553.4	81298.5	-	-	-	-
pmp001198	UPLC-MS/MS	132.1	57.03	-	-	131.095	C6H13NO2	[M+H]+	6-Deoxyfagomine	6-脱氧荞麦碱	Alkaloids	生物碱	Piperidine alkaloids	哌啶类生物碱	197449-09-5	1	-	-	-	2.51275e+06	2.35032e+06	2.18959e+06	6.86801e+06	6.1746e+06	6.55283e+06	3.16966e+06	2.62696e+06	2.64911e+06	3.3189e+06	3.45263e+06	4.03165e+06	-	-	-	-
Hmcp000233	UPLC-MS/MS	158.15	140.14	-	-	157.147	C9H19NO	[M+H]+	Dihydro-N-methylisopelletierine	二氢-N-甲基异石榴皮碱	Alkaloids	生物碱	Piperidine alkaloids	哌啶类生物碱	-	2	-	-	-	236171	241867	231377	77061.4	98862	108501	89008.6	100702	117961	122640	123219	106224	-	-	-	-
pmb0782	UPLC-MS/MS	86.1	69.07	-	-	85.0891	C5H11N	[M+H]+	Piperidine	哌啶	Alkaloids	生物碱	Piperidine alkaloids	哌啶类生物碱	110-89-4	3	-	-	-	1.41991e+06	1.40265e+06	1.37638e+06	2.70644e+06	3.23792e+06	2.72708e+06	1.53277e+06	1.42756e+06	1.54888e+06	1.58487e+06	1.76017e+06	1.67105e+06	C01746	ko00960	C01746	-
MWStz063	UPLC-MS/MS	170.15	152.14	-	-	169.147	C10H19NO	[M+H]+	2-Ethyl-2,6,6-trimethylpiperidin-4-one	2-乙基-2,6,6-三甲基派啶-4-酮	Alkaloids	生物碱	Piperidine alkaloids	哌啶类生物碱	133568-79-3	3	-	-	-	154473	149598	163583	77799.5	74476.2	68784.8	64745.1	45101.3	62898.9	80061.5	80616.7	62580.5	-	-	-	-
MWSmce338	UPLC-MS/MS	146.08	70.06	-	-	145.074	C6H11NO3	[M+H]+	N-Hydroxypipecolic acid	N-羟基-2-哌啶羧酸	Alkaloids	生物碱	Piperidine alkaloids	哌啶类生物碱	115819-92-6	3	-	-	-	204592	190630	191218	277535	272761	327029	608156	575386	543396	360609	373275	410297	-	-	-	-
Smhp002357	UPLC-MS/MS	519.18	339.12	-	-	518.179	C26H30O11	[M+H]+	tortoside f	tortoside f	Lignans and Coumarins	木脂素和香豆素	Lignans	木脂素	-	2	-	-	-	3.49286e+06	4.14286e+06	3.54615e+06	1.18699e+06	1.01212e+06	1.13673e+06	235909	282579	291178	1.62592e+06	1.64027e+06	1.57477e+06	-	-	-	-
Jmbn003306	UPLC-MS/MS	507.19	327.12	-	-	508.195	C25H32O11	[M-H]-	Clemastanin A	Clemastanin A	Lignans and Coumarins	木脂素和香豆素	Lignans	木脂素	172670-47-2	3	-	-	-	31444.4	6288.89	6288.89	179189	245206	220051	731398	689486	499826	290258	352141	369617	-	-	-	-
Lmzn001840	UPLC-MS/MS	399.13	355.14	-	-	400.137	C18H24O10	[M-H]-	Synargentolide E	Synargentolide E	Others	其它类	Lactones	内酯类化合物	-	2	-	-	-	75672.5	101262	110629	512869	696540	679850	1.14073e+07	1.19875e+07	9.35399e+06	4.69384e+06	5.0987e+06	5.07551e+06	-	-	-	-
Lmzn002730	UPLC-MS/MS	371.17	239.17	-	-	372.178	C18H28O8	[M-H]-	Dihydroboronolide	Dihydroboronolide	Others	其它类	Lactones	内酯类化合物	-	3	-	-	-	75048.2	76069	54654.6	466293	432844	545450	1.40557e+06	1.36681e+06	1.35586e+06	627760	733230	658059	-	-	-	-
Wagp005508	UPLC-MS/MS	457.2	209.15	-	-	456.2	C22H32O10	[M+H]+	3-Hydroxy-Beta-Ionone 3-(6''-Malonyl)Glucoside	3-Hydroxy-Beta-Ionone 3-(6''-Malonyl)Glucoside	Others	其它类	Others	其它	-	3	-	-	-	764458	745207	702614	6.75626e+06	5.92019e+06	6.54392e+06	6.96342e+06	7.40842e+06	7.22e+06	4.85896e+06	4.53735e+06	4.75799e+06	-	-	-	-
Lmmp102003	UPLC-MS/MS	219.17	159.12	-	-	218.167	C15H22O	[M+H]+	1(10)E,4E-Germacrone	1(10)E,4E-Germacrone	Others	其它类	Others	其它	-	3	-	-	-	549949	412100	567359	892934	1.14781e+06	1.11246e+06	6.06282e+06	5.42537e+06	5.93825e+06	2.52122e+06	2.96702e+06	2.6528e+06	-	-	-	-
Wcsn011122	UPLC-MS/MS	279.23	279.24	-	-	280.24	C18H32O2	[M-H]-	(5Z,10E,14S)-14-hydroxy-2,6,10-trimethylpentadeca-5,10-dien-4-one	(5Z,10E,14S)-14-hydroxy-2,6,10-trimethylpentadeca-5,10-dien-4-one	Others	其它类	Others	其它	-	3	-	-	-	2.12201e+07	2.40495e+07	2.24491e+07	1.34196e+07	1.28946e+07	1.27034e+07	1.1155e+07	1.04312e+07	1.09645e+07	1.57132e+07	1.69707e+07	1.3084e+07	-	-	-	-
Wcfn003424	UPLC-MS/MS	337.09	191.06	-	-	338.1	C16H18O8	[M-H]-	Coumaroyl Quinic Acid	Coumaroyl Quinic Acid	Others	其它类	Others	其它	-	3	-	-	-	2550.18	2550.18	2550.18	2550.18	2550.18	12750.9	2.15858e+06	2.41674e+06	2.83283e+06	879867	848418	1.17797e+06	-	-	-	-
Zamn006847	UPLC-MS/MS	227.13	183.14	-	-	228.136	C12H20O4	[M-H]-	glycoric acid	glycoric acid	Others	其它类	Others	其它	-	3	-	-	-	37414.7	47210.5	36845.8	45226.5	54776.3	58782.1	1.63581e+06	1.74495e+06	1.87563e+06	743961	726718	641041	-	-	-	-
Wasn000410	UPLC-MS/MS	245.04	153	-	-	246.05	C6H15O8P	[M-H]-	sn-glycero-3-phospho-(1'-sn-glycerol)	sn-glycero-3-phospho-(1'-sn-glycerol)	Others	其它类	Others	其它	-	3	-	-	-	538868	636656	795721	461472	538182	584001	468168	652088	480780	713281	487013	664630	-	-	-	-
Lmhp001671	UPLC-MS/MS	355.1	163.04	-	-	354.095	C16H18O9	[M+H]+	Noreugenin-7-O-glucoside*	5,7-二羟基-2-甲基色酮-7-氧-葡萄糖苷*	Others	其它类	Others	其它	-	1	-	-	-	111390	79932.8	110538	1.48731e+06	1.38739e+06	1.62909e+06	2.92498e+07	2.80741e+07	2.74758e+07	1.96065e+07	1.72355e+07	1.80978e+07	-	-	-	-
Lhmp122205	UPLC-MS/MS	301.14	245.09	-	-	300.136	C18H20O4	[M+H]+	5-O-Methyllatifolin	5-甲氧基阔叶黄檀酚	Others	其它类	Others	其它	-	1	-	-	-	33406.9	47533.3	45367.7	44371.2	43380.7	49008.5	54674.1	54019.2	49669.6	53989.2	50414.4	43711.8	-	-	-	-
Wcdp006912	UPLC-MS/MS	274.28	88.08	-	-	273.267	C16H35NO2	[M+H]+	Lauryldiethanolamine	N-十二烷基乙醇胺	Others	其它类	Others	其它	1541-67-9	1	-	-	-	7.46169e+06	6.71783e+06	7.29698e+06	6.79063e+06	7.47032e+06	8.0671e+06	6.41692e+06	7.53986e+06	5.95324e+06	1.25464e+07	1.27014e+07	1.24132e+07	-	-	-	-
Hasp010605	UPLC-MS/MS	353.27	261.22	-	-	352.261	C21H36O4	[M+H]+	2,3-dihydroxypropyl (9Z,12Z,15Z)-octadeca-9,12,15-trienoate	十八碳-9,12,15-三烯酸 2,3-二羟丙酯	Others	其它类	Others	其它	129828-41-7	1	-	-	-	4.76576e+06	5.28744e+06	4.25801e+06	1.87595e+06	1.75866e+06	1.94311e+06	3.49837e+06	3.30561e+06	6.91755e+06	5.11403e+06	4.79116e+06	4.74787e+06	-	-	-	-
Wcdp004275	UPLC-MS/MS	230.25	57.07	-	-	229.241	C14H31NO	[M+H]+	Lauramine oxide	月桂基二甲基氧化胺	Others	其它类	Others	其它	1643-20-5	1	-	-	-	101058	92996.3	104093	125236	189039	123098	96829.8	91385.4	91552.8	122817	135016	134857	-	-	-	-
Zbzp007397	UPLC-MS/MS	181.12	135.12	-	-	180.115	C11H16O2	[M+H]+	5,6,7,7a-tetrahydro-4,4,7a-trimethyl-2(4H)-benzofuranone	5,6,7,7a-四氢-4,4,7a-三甲基-2(4H)-苯并呋喃酮	Others	其它类	Others	其它	15356-74-8	1	-	-	-	73608.7	54688.5	43097.3	69881.9	85862.1	66772.9	301390	317704	330887	161605	155051	149853	-	-	-	-
Lmgp009405	UPLC-MS/MS	211.1	165.09	-	-	210.089	C11H14O4	[M+H]+	3-(4-Methylpentanoyl)-3,4-dihydro-6-methyl-1,2-pyran-2,4-dione	3-(4-甲基戊酰基)-3,4-二氢-6-甲基-1,2-吡喃-2,4-二酮	Others	其它类	Others	其它	-	1	-	-	-	1.42108e+07	1.43863e+07	1.45816e+07	3.24581e+07	3.55266e+07	3.48401e+07	2.35007e+06	2.26175e+06	2.41505e+06	1.44298e+07	1.53631e+07	1.39718e+07	-	-	-	-
Zmsn002206	UPLC-MS/MS	375.13	153.06	-	-	376.137	C16H24O10	[M-H]-	Cornusoside A	Cornusoside A	Others	其它类	Others	其它	-	3	-	-	-	641313	813178	920417	783400	966664	878136	2.95072e+06	3.08826e+06	2.91191e+06	1.76422e+06	1.70791e+06	1.65207e+06	-	-	-	-
HX1226	UPLC-MS/MS	221.19	107.09	-	-	220.183	C15H24O	[M+H]+	4-Hydroxy-β-bulnesene	4-羟基-β-布藜烯	Others	其它类	Others	其它	-	1	-	-	-	159786	159786	159786	808143	861805	798929	4.87251e+06	5.46436e+06	5.17492e+06	2.31747e+06	2.88331e+06	2.58369e+06	-	-	-	-
Wagp004588	UPLC-MS/MS	475.21	209.15	-	-	474.21	C22H34O11	[M+H]+	Dihydrovomifoliol 4-O-malonyl glucoside	二氢伏米叶醇 4-O-丙二酰葡萄糖苷	Others	其它类	Others	其它	-	2	-	-	-	264857	350472	282797	617324	680175	1.06657e+06	1.15753e+06	1.66735e+06	1.01933e+06	763768	704351	547532	-	-	-	-
Wcdp010708	UPLC-MS/MS	263.24	81.07	-	-	262.23	C18H30O	[M+H]+	Octadeca-2,9,12,15-tetraen-1-ol	十八碳-2,9,12,15-四烯-1-醇	Others	其它类	Others	其它	-	2	-	-	-	2.01412e+06	2.34905e+06	2.37715e+06	176714	204149	421297	106453	269177	295589	873967	1.07007e+06	911561	-	-	-	-
Lhhp120823	UPLC-MS/MS	193.08	105.07	-	-	192.079	C11H12O3	[M+H]+	Eugenyl formate	甲酸丁子香酚酯	Others	其它类	Others	其它	-	2	-	-	-	3.81709e+06	4.14055e+06	1.81388e+06	2.26755e+06	2.49779e+06	2.27399e+06	2.78163e+06	2.2412e+06	2.22568e+06	2.18183e+06	2.19932e+06	1.48287e+06	-	-	-	-
Lchp000221	UPLC-MS/MS	207.06	91.05	-	-	206.058	C11H10O4	[M+H]+	3-Ethylidene-7-hydroxy-6-methoxyphthalide	3-亚乙基-7-羟基-6-甲氧基苯酞	Others	其它类	Others	其它	-	2	-	-	-	54938.3	54938.3	54938.3	312928	439299	274691	640176	750115	805084	460049	490493	526859	-	-	-	-
zjgp122321	UPLC-MS/MS	355.1	163.05	-	-	354.095	C16H18O9	[M+H]+	4-O-acetyl-3-O-caffeoyl-2-C-methyl-D-erythronate*	4-O-乙酰基-3-咖啡酰基-2-甲基-D-赤藓糖酸*	Others	其它类	Others	其它	-	1	-	-	-	79080.9	77379.6	101187	1.45899e+06	1.53021e+06	1.63159e+06	3.25026e+07	3.2983e+07	3.27751e+07	1.84757e+07	1.77537e+07	2.00111e+07	-	-	-	-
Lssp210247	UPLC-MS/MS	329.1	273.04	-	-	328.095	C18H16O6	[M+H]+	1,3,5,5,6-tetrahydroxy-4-isopentenyl xanthone	1,3,5,6-四羟基-4-异戊烯基呫吨酮	Others	其它类	Others	其它	-	2	-	-	-	47894.3	38654.1	42169.4	151551	145549	191429	2.37529e+06	2.23322e+06	2.25539e+06	1.14469e+06	1.0988e+06	1.09661e+06	-	-	-	-
Lskp211267	UPLC-MS/MS	179.07	133.06	-	-	178.063	C10H10O3	[M+H]+	3-Ethyl-7-hydroxyphthalide	3-乙基-7-羟基苯酞	Others	其它类	Others	其它	-	2	-	-	-	176566	169867	134003	227791	219129	209146	126727	129807	161350	162420	137156	164482	-	-	-	-
Wcgp003250	UPLC-MS/MS	163.08	103.05	-	-	162.068	C10H10O2	[M+H]+	2-Methyl-3-hydroxyindan-1-one	2-甲基-3-羟基吲哚-1-酮	Others	其它类	Others	其它	-	2	-	-	-	1.89572e+06	1.88778e+06	1.8084e+06	920409	1.11909e+06	852980	374611	542200	853038	1.06358e+06	1.42073e+06	937996	-	-	-	-
Wbmp006327	UPLC-MS/MS	425.18	289.05	-	-	424.173	C21H28O9	[M+H]+	Butyl 1,3,5-trihydroxy-4-{[3-(4-hydroxy-3-methoxyphenyl)prop-2-enoyl]oxy}cyclohexane-1-carboxylate	1,3,5-三羟基-4-{[3-(4-羟基-3-甲氧基苯基)丙-2-烯基]氧基}环己烷-1-甲酸丁酯	Others	其它类	Others	其它	-	2	-	-	-	112751	155842	176507	14805.4	14805.4	14805.4	138910	159308	118856	155637	96592.4	74026.8	-	-	-	-
Haxp007330	UPLC-MS/MS	179.06	135.01	-	-	178.063	C10H10O3	[M+H]+	p-Methoxycinnamic acid	对甲氧基肉桂酸	Others	其它类	Others	其它	-	2	-	-	-	27427.1	27427.1	27427.1	27427.1	27427.1	27427.1	388009	414187	346068	152234	156879	137135	-	-	-	-
Wcfn005424	UPLC-MS/MS	373.19	59.02	-	-	374.194	C18H30O8	[M-H]-	2-[2-[(Z)-pent-2-enyl]-3-[3,4,5-trihydroxy-6-(hydroxymethyl)oxan-2-yl]oxycyclopentyl]acetic acid	2-[2-[(Z)-pent-2-enyl]-3-[3,4,5-trihydroxy-6-(hydroxymethyl)oxan-2-yl]oxycyclopentyl]acetic acid	Others	其它类	Others	其它	-	3	-	-	-	1.01637e+06	1.19691e+06	1.21277e+06	9.9052e+06	1.07274e+07	1.29353e+07	1.88187e+07	1.87827e+07	18849899	1.2256e+07	1.03206e+07	1.0133e+07	-	-	-	-
Latp011219	UPLC-MS/MS	149.1	121.06	-	-	148.088	C10H12O	[M+H]+	3,5-Dimethyl-2,3-dihydrobenzofuran	3,5-二甲基-5-甲基-2,3-二氢苯并呋喃	Others	其它类	Others	其它	-	2	-	-	-	2.52978e+07	2.46424e+07	2.38742e+07	2.49654e+07	2.56126e+07	2.61533e+07	2.50062e+07	2.42671e+07	2.39071e+07	2.451e+07	2.52978e+07	2.52928e+07	-	-	-	-
HX1344	UPLC-MS/MS	115.04	55.02	-	-	114.032	C5H6O3	[M+H]+	5-(hydroxymethyl)-2(5H)-furanone	5-(羟甲基)-2(5H)-呋喃酮	Others	其它类	Others	其它	-	2	-	-	-	770874	832767	804678	368607	351266	396674	281601	292522	346706	508530	468707	504161	-	-	-	-
Wcdp000970	UPLC-MS/MS	121.06	103.05	-	-	120.058	C8H8O	[M+H]+	acetophenone	苯乙酮	Others	其它类	Others	其它	98-86-2	2	-	-	-	469743	432101	470591	450640	580145	486865	4.25636e+07	4.02987e+07	4.0005e+07	1.51702e+07	1.62776e+07	1.63305e+07	C07113	-	C07113	-
Zahp011689	UPLC-MS/MS	205.09	149.02	-	-	204.079	C12H12O3	[M+H]+	2,2-dimethylchromene-6-carboxylic acid*	2,2-二甲基色烯-6-甲酸*	Others	其它类	Others	其它	34818-56-9	2	-	-	-	1.0906e+07	1.21648e+07	1.15762e+07	1.15347e+07	1.36689e+07	1.40657e+07	2.54687e+07	2.45554e+07	2.31678e+07	1.89157e+07	1.77812e+07	1.83692e+07	-	-	-	-
Lhyp080509	UPLC-MS/MS	219.17	149.1	-	-	218.167	C15H22O	[M+H]+	Chamigrenal	Chamigrenal	Others	其它类	Others	其它	19912-84-6	2	-	-	-	20694.8	20694.8	20694.8	103474	105529	106010	1.00542e+06	2.40719e+06	2.38075e+06	650839	1.22923e+06	651719	-	-	-	-
Zmbn004194	UPLC-MS/MS	189.08	129.06	-	-	190.084	C8H14O5	[M-H]-	2-hydroxy-2-isobutylsuccinic acid	2-hydroxy-2-isobutylsuccinic acid	Others	其它类	Others	其它	-	3	-	-	-	1.81597e+06	2.17862e+06	2.11844e+06	1.60125e+07	1.9504e+07	1.93212e+07	490327	605447	582840	6.22008e+06	6.58275e+06	4.6627e+06	-	-	-	-
MWS1834	UPLC-MS/MS	125.06	83.05	-	-	124.052	C7H8O2	[M+H]+	2-Acetyl-5-methylfuran	2-乙酰基-5-甲基呋喃	Others	其它类	Others	其它	1193-79-9	3	-	-	-	10532.9	10532.9	10532.9	10532.9	10532.9	10532.9	136343	125060	136361	74287.9	71478.5	52664.7	-	-	-	-
zjgp122326	UPLC-MS/MS	286.092	124.039	-	-	285.085	C12H15NO7	[M+H]+	Pyridine-4-formyl-O-β-D-glucopyranoside*	吡啶-4-甲酰-O-β-D-吡喃葡萄糖酯苷*	Others	其它类	Others	其它	-	3	-	-	-	336266	275401	252536	330482	412168	375526	462176	216857	202967	352117	256314	467185	-	-	-	-
Lhmp122023	UPLC-MS/MS	441.101	193.049	-	-	440.096	C19H20O12	[M+H]+	3-O-caffeoyl malonyl quinic acid	3-O-咖啡酰丙二酰奎宁酸	Others	其它类	Others	其它	-	3	-	-	-	245033	271589	352018	126746	166046	158667	84363.1	105950	109137	142475	289433	216470	-	-	-	-
Wcsn010224	UPLC-MS/MS	277.22	277.22	-	-	278.225	C18H30O2	[M-H]-	14-hydroxy-2,6,10-trimethylpentadeca-2,5,10-trien-4-one*	14-羟基-2,6,10-三甲基十五碳-2,5,10-三烯-4-酮*	Others	其它类	Others	其它	-	1	-	-	-	6.20852e+06	6.89609e+06	6.67993e+06	2.69832e+06	2.83718e+06	3.01735e+06	1.18186e+07	1.17764e+07	1.00715e+07	8.48165e+06	8.79363e+06	7.38762e+06	-	-	-	-
Wafn003429	UPLC-MS/MS	441.2	249.13	-	-	382.184	C16H30O10	[M+CH3COOH-H]-	3-Methylbutyl 6-O-(alpha-L-arabinopyranosyl)-beta-D-glucopyranoside	3-甲基丁基 6-O-(α-L-阿拉伯吡喃糖基)-β-D-吡喃葡萄糖苷	Others	其它类	Others	其它	-	1	-	-	-	1.99372e+07	1.9901e+07	2.16739e+07	3.51735e+07	3.54034e+07	4.52283e+07	1.17369e+07	1.53734e+07	1.35787e+07	2.29862e+07	2.59303e+07	3.04123e+07	-	-	-	-
Wcsn010254	UPLC-MS/MS	277.22	277.22	-	-	278.225	C18H30O2	[M-H]-	4-[3-(4,8-dimethylnona-3,7-dienyl)-3-methyloxiran-2-yl]butan-2-one*	4-[3-(4,8-二甲基壬-3,7-二苯基)-3-甲基环氧乙烷-2-基]丁-2-酮*	Others	其它类	Others	其它	-	1	-	-	-	6.71038e+06	8.11411e+06	7.03058e+06	3.17498e+06	3.07322e+06	3.5907e+06	1.29613e+07	1.28631e+07	1.09602e+07	9.44103e+06	1.0149e+07	9.22682e+06	-	-	-	-
Wasn006585	UPLC-MS/MS	447.22	315.18	-	-	448.231	C21H36O10	[M-H]-	Geranyl 3-O-xylopyranosyl-glucopyranoside	香叶基 3-O-吡喃木糖基-吡喃葡萄糖苷	Others	其它类	Others	其它	-	1	-	-	-	83239.5	69527.2	59695.1	1.06589e+06	1.12314e+06	798105	3.53676e+06	4.14244e+06	5.2866e+06	2.44141e+06	2.1287e+06	2.22742e+06	-	-	-	-
Waln006120	UPLC-MS/MS	423.22	291.18	-	-	424.231	C19H36O10	[M-H]-	Octyl 6-O-Alpha-L-Arabinopyranosyl-Beta-D-Glucopyranoside	辛基 6-O-α-L-阿拉伯吡喃糖基-β-D-吡喃葡萄糖苷	Others	其它类	Others	其它	168288-07-1	1	-	-	-	307562	307562	307562	1.05941e+07	1.30866e+07	1.37748e+07	1.53781e+06	1.67991e+06	1.7718e+06	4.42952e+06	3.90774e+06	3.19803e+06	-	-	-	-
Ymmg000006	UPLC-MS/MS	281.14	123.08	-	-	282.147	C15H22O5	[M-H]-	Rugosic acid A	玫瑰酸A	Others	其它类	Others	其它	-	1	-	-	-	201253	264976	335410	1.41093e+06	1.39639e+06	1.73403e+06	810859	763605	737890	706587	931444	746835	-	-	-	-
Wcsn010496	UPLC-MS/MS	277.22	233.23	-	-	278.225	C18H30O2	[M-H]-	6,10,14-Trimethylpentadeca-5,9-Diene-2,13-Dione	6,10,14-三甲基十五碳-5,9-二烯-2,13-二酮	Others	其它类	Others	其它	-	1	-	-	-	140027	154125	139115	70789.4	75924.8	83302.3	223068	224174	209905	176923	179038	170577	-	-	-	-
Wafn003834	UPLC-MS/MS	463.22	331.18	-	-	464.226	C21H36O11	[M-H]-	Hydroxygeranyl 6-O-xylopyranosyl-glucopyranoside	羟基香叶基 6-O-吡喃木糖基-吡喃葡萄糖苷	Others	其它类	Others	其它	-	1	-	-	-	67620	78269	52446.2	100894	101083	75970.4	122274	143620	158169	94968.3	67600.4	63975.8	-	-	-	-
Hahn000897	UPLC-MS/MS	491.14	167.03	-	-	492.148	C20H28O14	[M-H]-	picrorhizin	苦根苷	Others	其它类	Others	其它	-	2	-	-	-	9705.18	9705.18	9705.18	9705.18	9705.18	48525.9	445172	504555	460284	204678	208974	185309	-	-	-	-
Zmxn110201	UPLC-MS/MS	331.1	108.02	-	-	332.111	C14H20O9	[M-H]-	2,6-Dimethoxy-4-hydroxyphenol-1-O-ß-D-glucopyranoside	2,6-二甲氧基-4-羟基苯酚-1-O-β-D-吡喃葡萄糖苷	Others	其它类	Others	其它	-	2	-	-	-	52061.7	72607.6	85112.9	289883	281270	360292	611942	707978	842843	415157	388555	397413	-	-	-	-
Zbfn003643	UPLC-MS/MS	477.16	293.09	-	-	478.169	C20H30O13	[M-H]-	3,4,5-Trimethoxyphenol-β-D-apiofuranosyl-(1→6)-O-β-D-glucopyranoside	3,4,5-三甲氧基苯酚-β-D-芹糖基-(1→6)-O-β-D-葡萄糖苷	Others	其它类	Others	其它	-	2	-	-	-	147932	106509	134003	196235	174352	156417	1.08942e+06	1.84511e+06	1.2946e+06	780950	790451	762041	-	-	-	-
Zmsn003194	UPLC-MS/MS	373.11	193.05	-	-	374.121	C16H22O10	[M-H]-	Secologaoside	裂环氧化马钱苷	Others	其它类	Others	其它	-	2	-	-	-	1.20806e+06	1.85574e+06	1.93926e+06	421007	590272	603783	236563	223254	128866	780792	674947	724041	-	-	-	-
Wasn002394	UPLC-MS/MS	403.16	181.09	-	-	344.147	C16H24O8	[M+CH3COOH-H]-	Glucosyl 2,6-dimethyl-8-oxoocta-2,6-dienoic acid	葡萄糖基 2,6-二甲基-8-氧八碳-2,6-二烯酸	Others	其它类	Others	其它	-	2	-	-	-	343935	333709	313597	383451	430425	481505	642061	687300	691729	474012	449391	407256	-	-	-	-
Wayn007352	UPLC-MS/MS	339.12	324.1	-	-	340.131	C20H20O5	[M-H]-	9-Oxodemethylmyricanane B	去甲氧基杨梅酮	Others	其它类	Others	其它	-	2	-	-	-	84546.8	51355.1	72139.8	705828	763806	662288	33541.6	31781.9	37229.6	137769	172113	125060	-	-	-	-
Hahn002084	UPLC-MS/MS	523.15	161.03	-	-	524.153	C24H28O13	[M-H]-	6'-O-caffeoylcatalpol	6'-O-咖啡酰梓醇	Others	其它类	Others	其它	-	2	-	-	-	475912	475912	475912	7.5984e+06	4.94678e+06	5.88428e+06	4.80821e+06	4.48926e+06	3.46383e+06	2.37956e+06	3.46479e+06	3.55551e+06	-	-	-	-
Wdbn005328	UPLC-MS/MS	417.16	181.05	-	-	418.163	C22H26O8	[M+H]+	3,3'-Bis(3,4-dihydro-4-hydroxy-6,8-dimethoxy-2H-1-benzopyran)	3,3'-双(3,4-二氢-4-羟基-6,8-二甲氧基-2H-1-苯并吡喃)	Others	其它类	Others	其它	-	2	-	-	-	3.10974e+06	1.21668e+06	2.07934e+06	830774	887438	717052	154111	155882	175346	1.56558e+06	834288	613382	-	-	-	-
Ladn006977	UPLC-MS/MS	279.1	235.11	-	-	280.11	C18H16O3	[M-H]-	2-Hydroxy-8-carboxy-1-methyl-5-ethenyl-9,10-dihydrophenanthrene*	2-羟基-8-羧基-1-甲基-5-乙烯基-9,10-二氢菲*	Others	其它类	Others	其它	-	2	-	-	-	26563.7	31229.6	12195.9	160889	179242	202636	924281	917252	835197	691164	738021	569389	-	-	-	-
Ladn007064	UPLC-MS/MS	279.1	235.11	-	-	280.11	C18H16O3	[M-H]-	2-Hydroxy-7-carboxy-1-methyl-5-ethenyl-9,10-dihydrophenanthrene*	2-羟基-7-羧基-1-甲基-5-乙烯基-9,10-二氢菲*	Others	其它类	Others	其它	-	2	-	-	-	1887.21	1887.21	1887.21	9436.05	16145.1	32940.1	1887.21	1887.21	1887.21	14793.9	35063.9	34278.8	-	-	-	-
Wasn002508	UPLC-MS/MS	365.18	203.13	-	-	366.189	C16H30O9	[M-H]-	Glucosyl 7-methyl-3-methyleneoctane-1,2,6,7-tetraol	葡萄糖基 7-甲基-3-亚甲基辛烷-1,2,6,7-四醇	Others	其它类	Others	其它	-	2	-	-	-	247599	288693	322959	993438	853022	986646	396651	508146	353435	403797	327934	319960	-	-	-	-
Zjbn102535	UPLC-MS/MS	271.1	256.07	-	-	272.105	C16H16O4	[M-H]-	1,7-dihydroxy-2,5-dimethoxy-9,10-dihydrophenanthrene	1,7-二羟基-2,5-二甲氧基-9,10-二氢菲	Others	其它类	Others	其它	-	2	-	-	-	42985.2	16435.3	31273.8	8615.76	8278.11	6262.23	485124	490042	424204	144279	126689	140180	-	-	-	-
pmn001435	UPLC-MS/MS	811.45	487.34	-	-	812.456	C42H68O15	[M-H]-	Prunellin A	夏枯草苷 A	Others	其它类	Others	其它	-	3	-	-	-	552803	523211	435035	144473	210487	137050	27410	27410	27410	154996	221534	193573	-	-	-	-
Wcgn008207	UPLC-MS/MS	223.1	179.11	-	-	224.105	C12H16O4	[M-H]-	Aspidinol	绵马酚	Others	其它类	Others	其它	519-40-4	2	-	-	-	234360	232069	218593	867062	931388	1.0793e+06	13531.7	13531.7	13531.7	88179.6	67658.6	73401	-	-	-	-
Lmfn002465	UPLC-MS/MS	499.15	337.09	-	-	500.153	C22H28O13	[M-H]-	1,2,4-Trihydroxynaphthalene-1,4-di-glucoside (Lawsoniaside)	1,2,4-三羟基萘-1,4-双-葡萄糖苷	Others	其它类	Others	其它	116964-02-4	2	-	-	-	4485.6	4485.6	4485.6	22428	42160.1	46720.5	241021	278917	163559	110319	117135	90589.1	-	-	-	-
Lcsn000560	UPLC-MS/MS	155	67.02	-	-	156.006	C6H4O5	[M-H]-	2,5-Furandicarboxylic acid	2,5-呋喃二羧酸酯；呋喃-2,5-二羧酸酯	Others	其它类	Others	其它	3238-40-2	2	-	-	-	96035.9	157319	170934	35808.5	36684.3	65873.6	181772	163814	153242	122859	140304	123619	C20450	-	C20450	-
Wcfn003882	UPLC-MS/MS	371.1	121.03	-	-	372.106	C16H20O10	[M-H]-	(2S,3S,4S,5R,6R)-6-(3-benzoyloxy-2-hydroxypropoxy)-3,4,5-trihydroxyoxane-2-carboxylic acid	(2S,3S,4S,5R,6R)-6-(3-benzoyloxy-2-hydroxypropoxy)-3,4,5-trihydroxyoxane-2-carboxylic acid	Others	其它类	Others	其它	-	3	-	-	-	780284	1.06825e+06	1.14338e+06	1.36034e+07	1.40897e+07	1.45892e+07	8.86222e+06	9.55164e+06	1.08289e+07	6.9809e+06	7.53846e+06	5.89331e+06	-	-	-	-
Lamp007045	UPLC-MS/MS	477.14	315.08	-	-	476.132	C23H24O11	[M+H]+	3-(4-hydroxybenzene)-5,7-dihydroxy-6-methoxychroman-4-one glucoside	3-(4-羟基苯亚甲基)-5,7-二羟基-6-甲氧基苯并二氢吡喃-4-酮 葡萄糖苷	Flavonoids	黄酮	Other Flavonoids	其它类黄酮	-	2	-	-	-	76265.5	50360.6	46083.4	549219	586761	573971	7.1996e+06	9.43509e+06	7.87833e+06	3.54725e+06	3.27518e+06	3.39538e+06	-	-	-	-
Wbtp006564	UPLC-MS/MS	317.07	302.04	-	-	316.058	C16H12O7	[M+H]+	4,8,10-trihydroxy-2-methoxy-1h,2h-furo[3,2-a]xanthen-11-one	4,8,10-三羟基-2-甲氧基-1h,2h-呋喃并[3,2-a]-11-蒽酮	Flavonoids	黄酮	Other Flavonoids	其它类黄酮	-	2	-	-	-	6.67013e+06	6.62872e+06	5.89023e+06	2.13765e+06	2.11938e+06	2.31638e+06	2.91457e+06	3.32561e+06	3.12953e+06	3.7474e+06	3.72096e+06	4.00432e+06	-	-	-	-
Lamp007327	UPLC-MS/MS	565.15	317.1	-	-	564.148	C26H28O14	[M+H]+	3,9-dihydroeucomnalin malonyl glucoside	3-(4-羟基苄基)-5,7-二羟基-6-甲氧基苯并二氢吡喃-4-酮 丙二酰葡萄糖苷	Flavonoids	黄酮	Other Flavonoids	其它类黄酮	-	2	-	-	-	108048	91569.8	138021	393974	257568	272784	2.92552e+06	3.26449e+06	2.63374e+06	1.16758e+06	1.41702e+06	1.33788e+06	-	-	-	-
Lamp007136	UPLC-MS/MS	563.14	315.08	-	-	562.132	C26H26O14	[M+H]+	3-(4-hydroxybenzene)-5,7-dihydroxy-6-methoxychroman-4-one malonyl glucoside	3-(4-羟基苯亚甲基)-5,7-二羟基-6-甲氧基苯并二氢吡喃-4-酮 丙二酰葡萄糖苷	Flavonoids	黄酮	Other Flavonoids	其它类黄酮	-	2	-	-	-	62001.2	62627.7	78465.6	675937	683303	741224	2.36492e+06	2.21993e+06	2.42363e+06	1.00396e+06	1.07363e+06	1.04817e+06	-	-	-	-
Zbdp002220	UPLC-MS/MS	333.12	171.06	-	-	332.111	C14H20O9	[M+H]+	2,6-Dimethoxypydroquinone-1-O-glucoside	2,6-二甲氧基对苯二酚-1-O-葡萄糖苷	Flavonoids	黄酮	Other Flavonoids	其它类黄酮	-	2	-	-	-	256989	223934	212840	708592	595812	664164	295368	355442	292248	395590	461149	375902	-	-	-	-
Laxp009625	UPLC-MS/MS	315.09	300.06	-	-	314.079	C17H14O6	[M+H]+	4,6-Dihydroxy-2-(4-Hydroxy-3-Methoxybenzylidene)-7-Methylbenzofuran-3(2h)-One	4,6-二羟基-2-(4-羟基-3-甲氧基亚苄基)-7-甲基苯并呋喃-3(2h)-酮	Flavonoids	黄酮	Other Flavonoids	其它类黄酮	-	2	-	-	-	4754.74	5097.39	7114.81	149379	168762	174120	2.7434e+06	2.62481e+06	2.40689e+06	1.15844e+06	1.19531e+06	1.24708e+06	-	-	-	-
Wbtp004753	UPLC-MS/MS	303.05	229.05	-	-	302.043	C15H10O7	[M+H]+	1,2,3,7,8-pentahydroxy-6-methylanthracene-9,10-dione	1,2,3,7,8-五羟基-6-甲基蒽-9,10-二酮	Flavonoids	黄酮	Other Flavonoids	其它类黄酮	-	2	-	-	-	4786.21	4786.21	4786.21	71473.6	23931.1	77052.6	330703	419477	321366	150092	232463	220290	-	-	-	-
Wbtp008378	UPLC-MS/MS	329.1	273.04	-	-	328.095	C18H16O6	[M+H]+	1,3,5,6-tetrahydroxy-2-(3-methylbut-2-en-1-yl)xanthen-9-one	1,3,5,6-四羟基-2-(3-甲基-2-烯-1-基)蒽酮	Flavonoids	黄酮	Other Flavonoids	其它类黄酮	-	2	-	-	-	60953	51541.9	59862.6	145069	166234	186707	764374	691588	595310	384093	440837	469517	-	-	-	-
Wbtp004961	UPLC-MS/MS	303.05	229.05	-	-	302.043	C15H10O7	[M+H]+	1,2,4,5-tetrahydroxy-7-(hydroxymethyl)anthracene-9,10-dione	1,2,4,5-四羟基-7-(羟甲基)蒽-9,10-二酮	Flavonoids	黄酮	Other Flavonoids	其它类黄酮	-	2	-	-	-	20154.1	4030.81	4030.81	34453.9	35276.2	72744.9	384624	395163	275084	161424	169176	93808.2	-	-	-	-
Lamp009626	UPLC-MS/MS	491.17	329.1	-	-	490.147	C24H26O11	[M+H]+	3-(4-methoxybenzylidene)-5,7-dihydroxy-6-methoxychroman-4-one glucoside	3-(4-甲氧基亚苄基)-5,7-二羟基-6-甲氧基苯并二氢吡喃-4-酮 葡糖苷	Flavonoids	黄酮	Other Flavonoids	其它类黄酮	-	2	-	-	-	67333.4	67333.4	67333.4	67333.4	67333.4	67333.4	723279	747311	567464	384250	380548	336667	-	-	-	-
Wbsp000207	UPLC-MS/MS	725.19	147.27	-	-	724.179	C39H32O14	[M+H]+	7-[[2-O,6-O-Bis(4-hydroxy-trans-cinnamoyl)-β-D-glucopyranosyl]oxy]-4',5-dihydroxyflavone	7-[[2-O,6-O-双(4-羟基-反-肉桂酰基)-β-D-葡萄糖基]氧基]-4',5-二羟基黄酮	Flavonoids	黄酮	Other Flavonoids	其它类黄酮	-	2	-	-	-	116771	69970.3	59600.5	2.38639e+06	2.49898e+06	2.70673e+06	8.14424e+07	7.91539e+07	8.12022e+07	6.00092e+07	5.89906e+07	5.84144e+07	-	-	-	-
Lamp006438	UPLC-MS/MS	549.16	301.11	-	-	548.152	C26H28O13	[M+H]+	Astrapterocarpan-3-O-malonyl glucoside	黄芪紫檀烷-7-氧-丙二酰葡萄糖苷	Flavonoids	黄酮	Other Flavonoids	其它类黄酮	-	2	-	-	-	47673.4	9534.69	9534.69	1.4192e+06	1.59202e+06	1.59895e+06	4.1689e+07	4.16912e+07	3.86928e+07	1.92862e+07	1.82588e+07	1.96088e+07	-	-	-	-
Ladp005693	UPLC-MS/MS	563.18	315.12	-	-	562.169	C27H30O13	[M+H]+	portulacanone A malonyl glucoside	马齿苋黄酮 A 丙二酰葡萄糖苷	Flavonoids	黄酮	Other Flavonoids	其它类黄酮	-	2	-	-	-	45373.6	59241	40709.2	967602	1.14087e+06	1.25863e+06	4.12167e+07	40098702	3.89527e+07	1.63337e+07	1.61007e+07	1.82997e+07	-	-	-	-
Lamp008287	UPLC-MS/MS	301.11	167.07	-	-	300.099	C17H16O5	[M+H]+	3-Hydroxy-9,10-dimethoxypterocarpan*	3-羟基-9,10-二甲氧基紫檀素*	Flavonoids	黄酮	Other Flavonoids	其它类黄酮	-	2	-	-	-	29001.7	29001.7	29001.7	145008	145065	180445	2.41648e+06	2.52931e+06	2.1675e+06	845834	1.10965e+06	1.09754e+06	-	-	-	-
Hmhp006479	UPLC-MS/MS	317.1	137.06	-	-	316.095	C17H16O6	[M+H]+	2-(2,4-dihydroxybenzyl)-6,8-dihydroxy-7-methyl-3,4-dihydronaphthalen-1(2H)-one	2-(2,4-二羟基苄基)-6,8-二羟基-7-甲基-3,4-二氢萘-1(2H)-酮	Flavonoids	黄酮	Other Flavonoids	其它类黄酮	-	3	-	-	-	1235.35	1235.35	6176.76	1235.35	1235.35	1235.35	448335	372439	315310	182849	136981	148602	-	-	-	-
Hmgp001986	UPLC-MS/MS	349.06	303.05	-	-	348.048	C16H12O9	[M+H]+	5,7,8,3',4'-Pentahydroxy-6-methoxyxanthone	5,7,8,3',4'-五羟基-6-甲氧基氧杂蒽酮	Flavonoids	黄酮	Other Flavonoids	其它类黄酮	-	3	-	-	-	61457.2	22420.4	31520.5	47290.2	52093.6	41852.2	70516.6	69255.1	65481.8	62190.5	65445.9	67570.5	-	-	-	-
pmp001010	UPLC-MS/MS	317.1	302.08	-	-	316.095	C17H16O6	[M+H]+	1,2,3,7-Tetramethoxyxanthone	1,2,3,7-四甲氧基氧杂蒽酮	Flavonoids	黄酮	Other Flavonoids	其它类黄酮	22804-52-0	2	-	-	-	198691	198691	198691	993457	1.17341e+06	1.13192e+06	1.7549e+07	1.62922e+07	1.59729e+07	8.66229e+06	8.30601e+06	8.54543e+06	-	-	-	-
Wbtp003840	UPLC-MS/MS	437.11	275.05	-	-	436.101	C20H20O11	[M+H]+	1,3,6-trihydroxy-7-methoxy-2-[(2s,3r,4r,5s,6r)-3,4,5-trihydroxy-6-(hydroxymethyl)oxan-2-yl]xanthen-9-one	1,3,6-三羟基-7-甲氧基-2-[(2s,3r,4r,5s,6r)-3,4,5-三羟基-6-(羟甲基)氧基-2-基]蒽酮	Flavonoids	黄酮	Other Flavonoids	其它类黄酮	23445-00-3	2	-	-	-	181491	142188	139657	5.77929e+06	5.24371e+06	4.60439e+06	1.42489e+07	1.91906e+07	1.5954e+07	9.21648e+06	9.81584e+06	1.11868e+07	-	-	-	-
Lazp005423	UPLC-MS/MS	317.1	167.03	-	-	316.095	C17H16O6	[M+H]+	Pendulone	垂崖豆藤异黄烷醌	Flavonoids	黄酮	Other Flavonoids	其它类黄酮	69359-09-7	2	-	-	-	50716.2	50716.2	50716.2	50716.2	50716.2	50716.2	573436	581860	523623	298895	253581	280173	-	-	-	-
MWSmce566	UPLC-MS/MS	301.11	167.08	-	-	300.1	C17H16O5	[M+H]+	Astrapterocarpan*	黄芪紫檀烷*	Flavonoids	黄酮	Other Flavonoids	其它类黄酮	73340-41-7	2	-	-	-	28901.2	33557.6	24120.6	188625	168277	158527	2.78785e+06	2.70536e+06	2.36254e+06	1.00979e+06	1.13134e+06	1.13323e+06	-	-	-	-
pmp001006	UPLC-MS/MS	287.09	272.07	-	-	286.084	C16H14O5	[M+H]+	1,3,7-Trimethoxyxanthone	1,3,7-三甲氧基氧杂蒽酮	Flavonoids	黄酮	Other Flavonoids	其它类黄酮	3722-54-1	3	-	-	-	12254.4	12254.4	12254.4	12254.4	12254.4	12254.4	155076	144630	155141	61294.1	67346.2	61271.8	-	-	-	-
pmp001012	UPLC-MS/MS	333.097	318.1	-	-	332.09	C17H16O7	[M+H]+	6-Hydroxy-1,2,3,7-tetramethoxyxanthone	6-羟基-1,2,3,7-四甲氧基氧杂蒽酮	Flavonoids	黄酮	Other Flavonoids	其它类黄酮	-	3	-	-	-	61449.2	54591.6	49394.9	48673.3	63783.5	52292.3	105173	90527.7	92268.5	66322.2	63331	82743.1	-	-	-	-
Wbtn009050	UPLC-MS/MS	255.07	255.06	-	-	256.074	C15H12O4	[M-H]-	1,8-dihydroxy-2,6-dimethylxanthen-9-one	1,8-二羟基-2,6-二甲基-9-蒽酮	Flavonoids	黄酮	Other Flavonoids	其它类黄酮	-	2	-	-	-	406037	561873	348288	378370	435011	373643	515417	464214	454719	463483	479135	450437	-	-	-	-
Wbtn006810	UPLC-MS/MS	287.05	135.04	-	-	288.063	C15H12O6	[M-H]-	6,7-dihydroxy-1,3-dimethoxyxanthen-9-one	6,7-二羟基-1,3-二甲氧基-9-蒽酮	Flavonoids	黄酮	Other Flavonoids	其它类黄酮	-	2	-	-	-	258448	337348	279587	188431	138965	186115	317951	326621	326578	218746	267880	278598	-	-	-	-
Lamn006238	UPLC-MS/MS	477.13	315.09	-	-	478.147	C23H26O11	[M-H]-	3,9-dihydroeucomnalin glucoside*	3-(4-羟基苄基)-5,7-二羟基-6-甲氧基苯并二氢吡喃-4-酮 葡萄糖苷*	Flavonoids	黄酮	Other Flavonoids	其它类黄酮	-	2	-	-	-	48214.5	89018.4	86409.6	116730	112394	122482	632221	612199	684513	386772	323779	388748	-	-	-	-
pmf0516	UPLC-MS/MS	421.08	301.05	-	-	422.085	C19H18O11	[M-H]-	Mangiferin	杧果苷	Flavonoids	黄酮	Other Flavonoids	其它类黄酮	4773-96-0	2	-	-	-	241747	333677	310816	770035	707383	707601	87881.1	64518	33486.7	399814	423881	314378	C10077	-	C10077	-
Wbtn006077	UPLC-MS/MS	405.08	243.03	-	-	406.09	C19H18O10	[M-H]-	Lancerin; 4-C-Glucosyl-1,3,7-Trihydroxyxanthone	柳叶素；4-C-β-D-葡萄糖基-1,3,7-三羟基呫吨酮	Flavonoids	黄酮	Other Flavonoids	其它类黄酮	81991-99-3	2	-	-	-	41893.7	49355.4	66000	276486	279978	238439	571677	645940	558847	388179	415548	349361	C10075	-	C10075	-
Lhmp122112	UPLC-MS/MS	497.31	335.26	-	-	496.304	C27H44O8	[M+H]+	5-Pregnene-3,17,20-triol-20-O-glucoside	5-孕甾烯-3,17,20-三醇-20-O-葡萄糖苷	Steroids	甾体	Cardiac glycoside	强心苷	-	2	-	-	-	288759	292349	296030	93742.1	78859.1	99703.2	203821	208449	157567	337437	253529	248255	-	-	-	-
pmp001264	UPLC-MS/MS	274.27	256.27	-	-	273.267	C16H35NO2	[M+H]+	Hexadecylsphingosine	十六烷基鞘胺醇	Lipids	脂质	Sphingolipids	鞘脂	-	1	-	-	-	4.34469e+06	3.5449e+06	4.05386e+06	4.11473e+06	4.21212e+06	4.211e+06	3.81528e+06	4.62399e+06	3.90514e+06	7.1172e+06	8.28064e+06	7.01558e+06	-	-	-	-
Walp007043	UPLC-MS/MS	274.27	88.08	-	-	273.267	C16H35NO2	[M+H]+	2-Aminohexadecane-1,4-diol	2-氨基十六烷-1,4-二醇	Lipids	脂质	Sphingolipids	鞘脂	-	1	-	-	-	7.06907e+06	6.5987e+06	7.46432e+06	7.22051e+06	7.44366e+06	7.37653e+06	5.84199e+06	7.45566e+06	6.21795e+06	1.20058e+07	1.28204e+07	1.20856e+07	-	-	-	-
WaYp006462	UPLC-MS/MS	290.27	228.23	-	-	289.262	C16H35NO3	[M+H]+	2-Aminohexadecane-1,5,15-triol	2-氨基十六烷-1,5,15-三醇	Lipids	脂质	Sphingolipids	鞘脂	-	1	-	-	-	54140.4	50148.3	63842.9	65081.2	55719.3	77384.9	49436.4	56321.3	54539.3	79461.8	68833.3	78769.7	-	-	-	-
Walp007190	UPLC-MS/MS	362.33	300.29	-	-	361.319	C20H43NO4	[M+H]+	2-AminoicoSane-1,5,7,19-tetraol	2-氨基二十烷-1,5,7,19-四醇	Lipids	脂质	Sphingolipids	鞘脂	-	1	-	-	-	1.03815e+06	928315	976594	868936	932411	921010	987836	1.08625e+06	933364	1.58892e+06	1.69664e+06	1678212	-	-	-	-
Walp007192	UPLC-MS/MS	406.35	300.29	-	-	405.345	C22H47NO5	[M+H]+	2-aminodocoSane-1,6,19,20,21-pentaol	2-氨基二十二烷-1,6,19,20,21-戊醇	Lipids	脂质	Sphingolipids	鞘脂	-	1	-	-	-	169137	153868	132582	131366	100211	120011	108379	207543	141157	266633	254580	245412	-	-	-	-
Walp007214	UPLC-MS/MS	290.27	88.08	-	-	289.262	C16H35NO3	[M+H]+	2-Aminohexadecane-1,5,6-triol	2-氨基十六烷-1,5,6-三醇	Lipids	脂质	Sphingolipids	鞘脂	-	1	-	-	-	117797	117667	145694	106224	73685.8	89538	179872	180816	195903	104291	96789.2	96656.9	-	-	-	-
Walp004752	UPLC-MS/MS	218.21	88.08	-	-	217.204	C12H27NO2	[M+H]+	2-Aminododecane-1,4-diol	2-氨基十二烷-1,4-二醇	Lipids	脂质	Sphingolipids	鞘脂	-	1	-	-	-	168713	173198	148632	364229	267443	293841	312797	364959	481974	310476	270893	299302	-	-	-	-
Lmbp005578	UPLC-MS/MS	316.28	60.04	-	-	315.277	C18H37NO3	[M+H]+	4-Hydroxy-8-sphingenine	脱水植物鞘氨醇	Lipids	脂质	Sphingolipids	鞘脂	-	2	-	-	-	6113.1	55456.7	6113.1	60562.9	146211	56715.2	6113.1	6113.1	30565.5	43874.9	53897.2	62551.5	-	-	-	-
WaYp007548	UPLC-MS/MS	230.25	62.06	-	-	229.241	C14H31NO	[M+H]+	2-Aminotetradecan-1-ol*	2-氨基十四烷-1-醇*	Lipids	脂质	Sphingolipids	鞘脂	-	2	-	-	-	45381.7	40038.7	36318.9	64080.2	81287.9	42492.1	43580.5	44452	46390.6	53247.2	42407	46191.1	-	-	-	-
Walp007095	UPLC-MS/MS	230.25	62.06	-	-	229.241	C14H31NO	[M+H]+	2-Amino-7-methyltridecan-1-ol*	2-氨基-7-甲基十三烷-1-醇*	Lipids	脂质	Sphingolipids	鞘脂	-	2	-	-	-	39939	52353.5	40249.2	65912.6	89906.9	44339.1	42964.4	33897.1	44559.8	54459.5	44205.5	62005.1	-	-	-	-
WaYp007721	UPLC-MS/MS	290.27	242.25	-	-	289.262	C16H35NO3	[M+H]+	2-Aminohexadecane-1,16,16-triol	2-氨基十六烷-1,16,16-三醇	Lipids	脂质	Sphingolipids	鞘脂	-	2	-	-	-	101462	108106	102582	103107	100659	101493	374471	479389	424652	345439	262092	209702	-	-	-	-
Walp008102	UPLC-MS/MS	302.31	88.08	-	-	301.298	C18H39NO2	[M+H]+	2-Aminooctadecane-1,4-diol	2-氨基十八烷-1,4-二醇	Lipids	脂质	Sphingolipids	鞘脂	-	2	-	-	-	357694	399912	380343	428216	376175	408994	413563	367973	478642	394048	358175	360045	-	-	-	-
Walp007182	UPLC-MS/MS	274.27	88.08	-	-	273.267	C16H35NO2	[M+H]+	2-Aminohexadecane-1,15-diol	2-氨基十六烷-1,15-二醇	Lipids	脂质	Sphingolipids	鞘脂	-	2	-	-	-	769786	701167	892226	897536	840372	762208	815359	1.1836e+06	726788	1.7182e+06	1.52803e+06	1.49802e+06	-	-	-	-
Walp006011	UPLC-MS/MS	246.24	88.08	-	-	245.236	C14H31NO2	[M+H]+	2-Aminotetradecane-1,4-diol	2-氨基十四烷-1,4-二醇	Lipids	脂质	Sphingolipids	鞘脂	-	2	-	-	-	134413	144010	153590	198075	197718	161887	151776	140203	176854	183286	177498	158834	-	-	-	-
pmb2221	UPLC-MS/MS	318.3	60.04	-	-	317.293	C18H39NO3	[M+H]+	4-Hydroxysphinganine; Phytosphingosine	4-羟基鞘氨醇; 植物鞘氨醇	Lipids	脂质	Sphingolipids	鞘脂	554-62-1	3	-	-	-	520623	587178	596739	969752	1.00085e+06	1.02507e+06	306699	309216	335716	670546	661444	628829	C12144	ko00600,ko01100	C12144	-
MWSHC2067	UPLC-MS/MS	139.04	65.04	-	-	138.032	C7H6O3	[M+H]+	Protocatechualdehyde	原儿茶醛	Others	其它类	Aldehyde compounds	醛类化合物	139-85-5	2	-	-	-	1.21235e+06	1.29125e+06	1.25667e+06	1.17261e+07	9571653	1.08874e+07	5.34713e+06	4.73973e+06	5.1017e+06	5.77349e+06	4.53284e+06	5.21576e+06	C16700	ko00950	C16700	-
mws1350	UPLC-MS/MS	181.05	151	-	-	182.058	C9H10O4	[M-H]-	Syringaldehyde; 4-Hydroxy-3,5-Dimethoxybenzaldehyde	丁香醛; 4-羟基-3,5-二甲氧基苯甲醛	Others	其它类	Aldehyde compounds	醛类化合物	134-96-3	3	-	-	-	1.69154e+06	1.54716e+06	1.4051e+06	839248	930091	873814	883930	715530	824512	1.06535e+06	1.03889e+06	806949	-	-	-	-
Wmlp000056	UPLC-MS/MS	183.06	91.05	-	-	182.058	C9H10O4	[M+H]+	3,5-Dimethoxy-4-hydroxybenzaldehyde	3,5-二甲氧基-4-羟基苯甲醛	Others	其它类	Aldehyde compounds	醛类化合物	-	2	-	-	-	378474	408054	433590	298572	266307	280352	1.1911e+06	1.15085e+06	1.14726e+06	560078	627777	625474	-	-	-	-
MWSCX017	UPLC-MS/MS	165.05	119.05	-	-	164.047	C9H8O3	[M+H]+	4-hydroxyphenyl acrylaldehyde	4-羟苯基丙烯醛	Others	其它类	Aldehyde compounds	醛类化合物	-	3	-	-	-	120161	120161	600806	1.10061e+06	1.06234e+06	1.18071e+06	2.03347e+06	1.84142e+06	1.98539e+06	1.30857e+06	1.23733e+06	1.1249e+06	-	-	-	-
mws0009	UPLC-MS/MS	179.07	91.06	-	-	178.063	C10H10O3	[M+H]+	Coniferaldehyde	松柏醛	Others	其它类	Aldehyde compounds	醛类化合物	20649-42-7	3	-	-	-	121635	129376	94880.8	100172	94307.9	98981.6	46767	65467.2	14762.3	77939.6	91189	82695.3	C02666	ko00940,ko01100,ko01110	C02666	-
MWSmce644	UPLC-MS/MS	209.08	93.03	-	-	208.074	C11H12O4	[M+H]+	4-Acetoxy-3-Ethoxybenzaldehyde	4-乙酰氧基-3-乙氧基苯甲醛	Others	其它类	Aldehyde compounds	醛类化合物	72207-94-4	3	-	-	-	14888.7	14888.7	14888.7	14888.7	14888.7	14888.7	102978	99613.7	110391	74443.5	80027.7	75171.8	-	-	-	-
MWSmce040	UPLC-MS/MS	153.05	65.04	-	-	152.047	C8H8O3	[M+H]+	Isovanillin	异香草醛	Others	其它类	Aldehyde compounds	醛类化合物	621-59-0	3	-	-	-	836004	982299	705574	977698	1.09717e+06	875263	2.28794e+06	1.64285e+06	1.89657e+06	1.18742e+06	1.38743e+06	1.48745e+06	-	-	-	-
mws0628	UPLC-MS/MS	121.03	92.03	-	-	122.037	C7H6O2	[M-H]-	4-Hydroxybenzaldehyde	4-羟基苯甲醛	Others	其它类	Aldehyde compounds	醛类化合物	123-08-0	2	-	-	-	164040	238462	184980	226860	224533	159388	2.12326e+06	1.87995e+06	1.86135e+06	675808	808528	671253	C00633	ko01100	C00633	-
mws0458	UPLC-MS/MS	151.04	136.02	-	-	152.047	C8H8O3	[M-H]-	Vanillin; 4-Hydroxy-3-Methoxybenzaldehyde	香草醛; 4-羟基-3-甲氧基苯甲醛	Others	其它类	Aldehyde compounds	醛类化合物	121-33-5	3	-	-	-	1.37109e+06	1.56381e+06	1.17201e+06	973626	1.14623e+06	1.20214e+06	2.31347e+06	2.36287e+06	2.60246e+06	1.8111e+06	1.57139e+06	1.97034e+06	C00755	ko00996,ko01100,ko01110	C00755	-
Wcdp007360	UPLC-MS/MS	496.34	184.07	-	-	495.332	C24H50NO7P	[M+H]+	LysoPC 16:0*	溶血磷脂酰胆碱 16:0*	Lipids	脂质	LPC	溶血磷脂酰胆碱	17364-16-8	1	-	-	-	1.65742e+07	2.00337e+07	1.77217e+07	9.83795e+06	1.04742e+07	9.496e+06	1.78742e+07	1.89117e+07	1.69316e+07	1.54131e+07	1.44564e+07	1.52985e+07	-	-	-	-
pmp001251	UPLC-MS/MS	520.34	184.07	-	-	519.332	C26H50NO7P	[M+H]+	LysoPC 18:2(2n isomer)	溶血磷脂酰胆碱 18:2(2n异构)	Lipids	脂质	LPC	溶血磷脂酰胆碱	-	1	-	-	-	716067	803509	811794	224568	220789	237257	96043.3	103930	76219.1	390105	384408	351297	-	-	-	-
Lmhp010190	UPLC-MS/MS	522.36	184.07	-	-	521.348	C26H52NO7P	[M+H]+	LysoPC 18:1(2n isomer)	溶血磷脂酰胆碱 18:1(2n异构)	Lipids	脂质	LPC	溶血磷脂酰胆碱	-	1	-	-	-	4.92757e+07	5.23535e+07	5.22305e+07	1.05066e+07	1.08197e+07	1.15927e+07	6.08696e+06	6.06132e+06	4.66921e+06	2.48314e+07	2.47214e+07	2.31552e+07	-	-	-	-
pmb0865	UPLC-MS/MS	518.32	184.07	-	-	517.317	C26H48NO7P	[M+H]+	LysoPC 18:3(2n isomer)	溶血磷脂酰胆碱 18:3(2n异构)	Lipids	脂质	LPC	溶血磷脂酰胆碱	-	1	-	-	-	6.60461e+07	6.63629e+07	7.37219e+07	2.69275e+07	2.65899e+07	2.85436e+07	1.32578e+07	1.22454e+07	1.06231e+07	3.57689e+07	4.31721e+07	4.13014e+07	-	-	-	-
Lmhp010908	UPLC-MS/MS	536.37	184.07	-	-	535.364	C27H54NO7P	[M+H]+	LysoPC 19:1	溶血磷脂酰胆碱 19:1	Lipids	脂质	LPC	溶血磷脂酰胆碱	-	1	-	-	-	1.96678e+06	2.07259e+06	1.9557e+06	130551	113212	122194	119548	139294	139514	648695	751268	718218	-	-	-	-
pmp001273	UPLC-MS/MS	520.34	184.07	-	-	519.332	C26H50NO7P	[M+H]+	LysoPC 18:2	溶血磷脂酰胆碱 18:2	Lipids	脂质	LPC	溶血磷脂酰胆碱	-	1	-	-	-	1.02227e+06	1.39363e+06	1.16186e+06	644934	580317	580792	828636	834008	775620	1.23109e+06	836440	884472	-	-	-	-
mws0126	UPLC-MS/MS	524.37	184.07	-	-	523.364	C26H54NO7P	[M+H]+	LysoPC 18:0	溶血磷脂酰胆碱 18:0	Lipids	脂质	LPC	溶血磷脂酰胆碱	19420-57-6	1	-	-	-	1.3018e+06	1.3897e+06	1.48761e+06	629230	641172	651180	1.27487e+06	1.40827e+06	1.09553e+06	993196	1.13467e+06	1.18259e+06	-	-	-	-
Lmhp008833	UPLC-MS/MS	494.32	184.07	-	-	493.317	C24H48NO7P	[M+H]+	LysoPC 16:1(2n isomer)*	溶血磷脂酰胆碱 16:1(2n异构)*	Lipids	脂质	LPC	溶血磷脂酰胆碱	-	1	-	-	-	2.95991e+06	2.79839e+06	3.01912e+06	715931	705788	757518	310479	319339	449404	1.20897e+06	1.27277e+06	1.36195e+06	-	-	-	-
Lmhp009890	UPLC-MS/MS	546.36	184.07	-	-	545.348	C28H52NO7P	[M+H]+	LysoPC 20:3	溶血磷脂酰胆碱 20:3	Lipids	脂质	LPC	溶血磷脂酰胆碱	1199257-41-4	1	-	-	-	3.08109e+06	3.40286e+06	3.36484e+06	145465	143036	126902	40159.2	47057.7	35583.7	1.02338e+06	1.1052e+06	1.12858e+06	-	-	-	-
pmd0136	UPLC-MS/MS	524.37	184.07	-	-	523.364	C26H54NO7P	[M+H]+	LysoPC 18:0(2n isomer)	溶血磷脂酰胆碱 18:0(2n异构)	Lipids	脂质	LPC	溶血磷脂酰胆碱	-	1	-	-	-	1.61019e+06	1.802e+06	1.92622e+06	833341	854366	859531	1.71509e+06	1.76514e+06	1.43976e+06	1.2711e+06	1.44337e+06	1.6354e+06	-	-	-	-
pmd0132	UPLC-MS/MS	496.34	184.07	-	-	495.332	C24H50NO7P	[M+H]+	LysoPC 16:0(2n isomer)*	溶血磷脂酰胆碱 16:0(2n异构)*	Lipids	脂质	LPC	溶血磷脂酰胆碱	-	1	-	-	-	1.852e+07	1.92206e+07	2.01637e+07	1.0058e+07	1.09373e+07	1.11226e+07	1.87461e+07	1.89409e+07	1.86507e+07	1.70402e+07	1.63755e+07	1.61202e+07	-	-	-	-
Lmhp011549	UPLC-MS/MS	550.39	184.07	-	-	549.379	C28H56NO7P	[M+H]+	LysoPC 20:1	溶血磷脂酰胆碱 20:1	Lipids	脂质	LPC	溶血磷脂酰胆碱	-	1	-	-	-	363552	377746	408533	71997.5	80503.2	82398.1	36709	49207.5	67534.8	225435	171683	292171	-	-	-	-
Lmhp008718	UPLC-MS/MS	506.32	184.07	-	-	505.317	C25H48NO7P	[M+H]+	LysoPC 17:2	溶血磷脂酰胆碱 17:2	Lipids	脂质	LPC	溶血磷脂酰胆碱	-	1	-	-	-	1.36704e+06	1.45501e+06	1.45956e+06	283808	316260	312552	129517	100103	73597.7	618133	588628	626012	-	-	-	-
pmb0854	UPLC-MS/MS	518.32	184.07	-	-	517.317	C26H48NO7P	[M+H]+	LysoPC 18:3	溶血磷脂酰胆碱 18:3	Lipids	脂质	LPC	溶血磷脂酰胆碱	-	2	-	-	-	6.43098e+07	6.88143e+07	7.30404e+07	2.41283e+07	2.59292e+07	2.81931e+07	1.11349e+07	1.18686e+07	9.89719e+06	3.99443e+07	4.01521e+07	3.57323e+07	-	-	-	-
Lmhp009590	UPLC-MS/MS	508.34	184.07	-	-	507.332	C25H50NO7P	[M+H]+	LysoPC 17:1	溶血磷脂酰胆碱 17:1	Lipids	脂质	LPC	溶血磷脂酰胆碱	-	2	-	-	-	1.62657e+06	1.66328e+06	1.72492e+06	177913	203410	229250	95658.1	211554	76248.2	591904	672739	651427	-	-	-	-
pmp001281	UPLC-MS/MS	522.36	184.07	-	-	521.348	C26H52NO7P	[M+H]+	LysoPC 18:1	溶血磷脂酰胆碱 18:1	Lipids	脂质	LPC	溶血磷脂酰胆碱	-	2	-	-	-	4.82541e+07	5.04286e+07	5.52966e+07	9.98865e+06	1.10387e+07	1.17323e+07	5.20046e+06	5.23028e+06	4.34776e+06	2.33916e+07	2.43249e+07	2.31606e+07	-	-	-	-
pmb2260	UPLC-MS/MS	480.31	184.07	-	-	479.301	C23H46NO7P	[M+H]+	LysoPC 15:1	溶血磷脂酰胆碱 15:1	Lipids	脂质	LPC	溶血磷脂酰胆碱	-	2	-	-	-	226757	236682	289034	64108.4	52827.1	61771.2	64892.2	69790.2	85051.6	131354	107432	87464.2	-	-	-	-
Lmhp007598	UPLC-MS/MS	534.36	184.07	-	-	533.348	C27H52NO7P	[M+H]+	LysoPC 19:2(2n isomer)	溶血磷脂酰胆碱 19:2(2n异构)	Lipids	脂质	LPC	溶血磷脂酰胆碱	-	2	-	-	-	423936	286432	229569	71711.8	80447.2	85348.6	104763	127901	99814.4	167567	165698	158191	-	-	-	-
Lmhp007840	UPLC-MS/MS	534.36	184.07	-	-	533.348	C27H52NO7P	[M+H]+	LysoPC 19:2	溶血磷脂酰胆碱 19:2	Lipids	脂质	LPC	溶血磷脂酰胆碱	-	2	-	-	-	461904	240236	595443	131988	67946.2	81002.6	83483.8	125466	147836	248666	148232	232363	-	-	-	-
pmp001270	UPLC-MS/MS	494.32	184.07	-	-	493.317	C24H48NO7P	[M+H]+	LysoPC 16:1*	溶血磷脂酰胆碱 16:1*	Lipids	脂质	LPC	溶血磷脂酰胆碱	76790-27-7	1	-	-	-	2.91222e+06	2.95381e+06	3.10666e+06	746787	732612	812090	503583	345989	460743	1.32393e+06	1.26312e+06	1.31432e+06	-	-	-	-
pmd0130	UPLC-MS/MS	468.31	184.07	-	-	467.301	C22H46NO7P	[M+H]+	LysoPC 14:0	溶血磷脂酰胆碱 14:0	Lipids	脂质	LPC	溶血磷脂酰胆碱	20559-16-4	2	-	-	-	136820	160372	135283	98772.1	118553	101739	10910.7	16125	8144.43	89376.5	92382.9	72943.6	-	-	-	-
pmb2406	UPLC-MS/MS	510.36	184.07	-	-	509.348	C25H52NO7P	[M+H]+	LysoPC 17:0	溶血磷脂酰胆碱 17:0	Lipids	脂质	LPC	溶血磷脂酰胆碱	50930-23-9	2	-	-	-	826675	860460	893969	285932	305365	302083	151149	164598	140827	419507	479290	432247	-	-	-	-
pmb2319	UPLC-MS/MS	482.32	184.07	-	-	481.317	C23H48NO7P	[M+H]+	LysoPC 15:0	溶血磷脂酰胆碱 15:0	Lipids	脂质	LPC	溶血磷脂酰胆碱	108273-89-8	3	-	-	-	743099	385026	786868	39046.9	74604.5	62048.5	7809.38	7809.38	7809.38	234317	270580	242991	-	-	-	-
Lmhp008742	UPLC-MS/MS	542.32	184.07	-	-	541.317	C28H48NO7P	[M+H]+	LysoPC 20:5	溶血磷脂酰胆碱 20:5	Lipids	脂质	LPC	溶血磷脂酰胆碱	162440-04-2	3	-	-	-	610545	610461	616020	17338.8	16172.9	16634.2	3234.59	3234.59	3234.59	186545	190058	194392	-	-	-	-
pma1303	UPLC-MS/MS	492.31	184.07	-	-	491.301	C24H46NO7P	[M+H]+	LysoPC 16:2*	溶血磷脂酰胆碱 16:2*	Lipids	脂质	LPC	溶血磷脂酰胆碱	-	3	-	-	-	386048	429321	440829	96512.1	114927	129587	93256.2	78421.8	79375.4	198457	205471	175526	-	-	-	-
pmb0863	UPLC-MS/MS	492.31	184.07	-	-	491.301	C24H46NO7P	[M+H]+	LysoPC 16:2(2n isomer)*	溶血磷脂酰胆碱 16:2(2n异构)*	Lipids	脂质	LPC	溶血磷脂酰胆碱	-	3	-	-	-	439341	436887	474439	121475	111617	137156	82217.6	48261.1	51867	210920	225153	225113	-	-	-	-
Lmhp008924	UPLC-MS/MS	532.34	184.07	-	-	531.332	C27H50NO7P	[M+H]+	LysoPC 19:3	溶血磷脂酰胆碱 19:3	Lipids	脂质	LPC	溶血磷脂酰胆碱	-	3	-	-	-	133259	160623	163989	11506.4	13065.7	18609	29576.8	15737.1	16408	60578.3	71137.1	57310.2	-	-	-	-
pmd0147	UPLC-MS/MS	548.37	184.07	-	-	547.364	C28H54NO7P	[M+H]+	LysoPC 20:2	溶血磷脂酰胆碱 20:2	Lipids	脂质	LPC	溶血磷脂酰胆碱	-	3	-	-	-	537004	537468	569086	376877	378843	434632	251893	267985	259658	420546	491474	422415	-	-	-	-
pmd0146	UPLC-MS/MS	548.37	184.07	-	-	547.364	C28H54NO7P	[M+H]+	LysoPC 20:2(2n isomer)	溶血磷脂酰胆碱 20:2(2n异构)	Lipids	脂质	LPC	溶血磷脂酰胆碱	-	3	-	-	-	889528	953581	989648	199254	195756	180086	98543.2	94807.7	91025.5	399847	409207	388186	-	-	-	-
pmc0960	UPLC-MS/MS	544.34	184.07	-	-	543.332	C28H50NO7P	[M+H]+	LysoPC 20:4	溶血磷脂酰胆碱 20:4	Lipids	脂质	LPC	溶血磷脂酰胆碱	-	3	-	-	-	4.83339e+06	5.28247e+06	5.1901e+06	30498.9	50542.4	49199.5	20575.7	11305	9044.52	1.58535e+06	1.6749e+06	1.70492e+06	-	-	-	-
Lmhp008589	UPLC-MS/MS	476.28	335.26	-	-	475.27	C23H42NO7P	[M+H]+	LysoPE 18:3(2n isomer)	溶血磷脂酰乙醇胺 18:3(2n异构)	Lipids	脂质	LPE	溶血磷脂酰乙醇胺	-	1	-	-	-	1.94875e+07	1.94052e+07	1.97781e+07	4.43049e+06	5.25032e+06	5.06293e+06	2.02557e+06	3.04945e+06	2.74582e+06	7.77705e+06	8.67568e+06	8.83918e+06	-	-	-	-
pmb0876	UPLC-MS/MS	454.29	313.27	-	-	453.286	C21H44NO7P	[M+H]+	LysoPE 16:0	溶血磷脂酰乙醇胺 16:0	Lipids	脂质	LPE	溶血磷脂酰乙醇胺	53862-35-4	1	-	-	-	7.80047e+06	7.98592e+06	8.64385e+06	4.54265e+06	4.72257e+06	4.43151e+06	4.67205e+06	4.434e+06	4.10789e+06	5.59558e+06	5.70825e+06	5.57928e+06	-	-	-	-
Lmhp008763	UPLC-MS/MS	452.28	311.26	-	-	451.27	C21H42NO7P	[M+H]+	LysoPE 16:1(2n isomer)*	溶血磷脂酰乙醇胺 16:1(2n异构)*	Lipids	脂质	LPE	溶血磷脂酰乙醇胺	-	1	-	-	-	2.20151e+06	2.85152e+06	2.46245e+06	228454	259889	218650	97033.7	98915.7	78330.1	757565	994161	900915	-	-	-	-
Lmhp008801	UPLC-MS/MS	476.28	335.26	-	-	475.27	C23H42NO7P	[M+H]+	LysoPE 18:3	溶血磷脂酰乙醇胺 18:3	Lipids	脂质	LPE	溶血磷脂酰乙醇胺	-	2	-	-	-	1.79632e+07	2.1407e+07	1.99797e+07	4.29942e+06	5.06248e+06	4.93345e+06	2.96254e+06	2.93757e+06	2.6254e+06	7.41728e+06	9.02309e+06	8.89803e+06	-	-	-	-
Lmhp009034	UPLC-MS/MS	452.28	311.26	-	-	451.27	C21H42NO7P	[M+H]+	LysoPE 16:1*	溶血磷脂酰乙醇胺 16:1*	Lipids	脂质	LPE	溶血磷脂酰乙醇胺	-	1	-	-	-	2.78484e+06	2.87482e+06	2.74364e+06	275459	281054	312284	54537	62353	78328.7	940958	1.05057e+06	983655	-	-	-	-
Lmhp008273	UPLC-MS/MS	438.26	297.24	-	-	437.254	C20H40NO7P	[M+H]+	LysoPE 15:1(2n isomer)*	溶血磷脂酰乙醇胺 15:1(2n异构)*	Lipids	脂质	LPE	溶血磷脂酰乙醇胺	-	2	-	-	-	401512	368936	384550	70057.4	56252.5	60789.6	8256.98	11713.4	6143.36	104228	132414	140725	-	-	-	-
Lmhp008885	UPLC-MS/MS	440.28	299.26	-	-	439.27	C20H42NO7P	[M+H]+	LysoPE 15:0(2n isomer)*	溶血磷脂酰乙醇胺 15:0(2n异构)*	Lipids	脂质	LPE	溶血磷脂酰乙醇胺	-	2	-	-	-	1.60537e+06	1.91238e+06	1.65629e+06	41347.4	45874.2	31975.9	1381.33	1381.33	6906.64	549077	585898	635075	-	-	-	-
Lmhp009187	UPLC-MS/MS	440.28	299.26	-	-	439.27	C20H42NO7P	[M+H]+	LysoPE 15:0*	溶血磷脂酰乙醇胺 15:0*	Lipids	脂质	LPE	溶血磷脂酰乙醇胺	-	2	-	-	-	90434.8	191873	124797	36485.3	35684.1	37386.7	16701.7	22662.3	10010.9	75594.2	54371.4	83885.6	-	-	-	-
Lmhp009464	UPLC-MS/MS	466.29	325.27	-	-	465.286	C22H44NO7P	[M+H]+	LysoPE 17:1(2n isomer)*	溶血磷脂酰乙醇胺 17:1(2n异构)*	Lipids	脂质	LPE	溶血磷脂酰乙醇胺	-	2	-	-	-	1.98513e+06	1.954e+06	1.71008e+06	48449.4	56097.3	38539.7	7707.94	7707.94	7707.94	565961	621588	653633	-	-	-	-
Lmhp008440	UPLC-MS/MS	438.26	297.24	-	-	437.254	C20H40NO7P	[M+H]+	LysoPE 15:1*	溶血磷脂酰乙醇胺 15:1*	Lipids	脂质	LPE	溶血磷脂酰乙醇胺	-	2	-	-	-	365594	394871	407584	50491.1	64284.6	64286	10098.2	10098.2	10098.2	125527	114727	128760	-	-	-	-
pmb0874	UPLC-MS/MS	478.29	337.27	-	-	477.286	C23H44NO7P	[M+H]+	LysoPE 18:2(2n isomer)	溶血磷脂酰乙醇胺 18:2(2n异构)	Lipids	脂质	LPE	溶血磷脂酰乙醇胺	-	2	-	-	-	8.51715e+07	8.41318e+07	8.66483e+07	2.91011e+07	2.89606e+07	2.87314e+07	9.47829e+06	9.3636e+06	7.07294e+06	4.49495e+07	5.46536e+07	4.67729e+07	-	-	-	-
pmb0881	UPLC-MS/MS	478.29	337.27	-	-	477.286	C23H44NO7P	[M+H]+	LysoPE 18:2	溶血磷脂酰乙醇胺 18:2	Lipids	脂质	LPE	溶血磷脂酰乙醇胺	-	2	-	-	-	8.62464e+07	8.25981e+07	8.51061e+07	2.83039e+07	2.89573e+07	2.76245e+07	9.64546e+06	9.33468e+06	7.41897e+06	4.5222e+07	5.48142e+07	5.02015e+07	-	-	-	-
Lmhp009769	UPLC-MS/MS	466.29	325.27	-	-	465.286	C22H44NO7P	[M+H]+	LysoPE 17:1*	溶血磷脂酰乙醇胺 17:1*	Lipids	脂质	LPE	溶血磷脂酰乙醇胺	-	2	-	-	-	1.8869e+06	1.97798e+06	1.73219e+06	32630.9	51122.1	43014.7	6526.19	6526.19	6526.19	587695	634716	726911	-	-	-	-
Lmhp008688	UPLC-MS/MS	500.28	359.26	-	-	499.27	C25H42NO7P	[M+H]+	LysoPE 20:5	溶血磷脂酰乙醇胺 20:5	Lipids	脂质	LPE	溶血磷脂酰乙醇胺	-	2	-	-	-	88868.2	90363.7	77785.2	856.685	4283.42	856.685	856.685	856.685	856.685	28072.6	31113.6	36599.7	-	-	-	-
pmb0883	UPLC-MS/MS	482.32	341.31	-	-	481.317	C23H48NO7P	[M+H]+	LysoPE 18:0	溶血磷脂酰乙醇胺 18:0	Lipids	脂质	LPE	溶血磷脂酰乙醇胺	69747-55-3	3	-	-	-	222486	239978	253460	118818	121706	118865	84307.8	93345.7	80134.4	144571	168035	148234	-	-	-	-
mws0289	UPLC-MS/MS	480.31	339.29	-	-	479.301	C23H46NO7P	[M+H]+	LysoPE 18:1*	溶血磷脂酰乙醇胺 18:1*	Lipids	脂质	LPE	溶血磷脂酰乙醇胺	89576-29-4	3	-	-	-	7.45662e+06	7.83725e+06	7.56401e+06	1.04894e+06	1.36488e+06	1.41996e+06	608267	675597	245400	2.47332e+06	3.41934e+06	3.24554e+06	-	-	-	-
pmb0864	UPLC-MS/MS	426.26	285.24	-	-	425.254	C19H40NO7P	[M+H]+	LysoPE 14:0*	溶血磷脂酰乙醇胺 14:0*	Lipids	脂质	LPE	溶血磷脂酰乙醇胺	-	3	-	-	-	341989	390087	381296	23091.2	14075.7	23059	2815.13	2815.13	2815.13	124555	140329	122924	-	-	-	-
Lmhp008337	UPLC-MS/MS	426.26	285.24	-	-	425.254	C19H40NO7P	[M+H]+	LysoPE 14:0(2n isomer)*	溶血磷脂酰乙醇胺 14:0(2n异构)*	Lipids	脂质	LPE	溶血磷脂酰乙醇胺	-	3	-	-	-	278288	290032	292202	8164.82	17956.2	13516.7	1459.82	7285.61	5407.74	68511.8	83431	88838	-	-	-	-
pmd0160	UPLC-MS/MS	454.29	313.27	-	-	453.286	C21H44NO7P	[M+H]+	LysoPE 16:0(2n isomer)	溶血磷脂酰乙醇胺 16:0(2n异构)	Lipids	脂质	LPE	溶血磷脂酰乙醇胺	-	3	-	-	-	8.0966e+06	9.8685e+06	8.98319e+06	4.91152e+06	5.41266e+06	5.30692e+06	4.4028e+06	4.92096e+06	4.24148e+06	6.41397e+06	5.92918e+06	6.37972e+06	-	-	-	-
pmb0856	UPLC-MS/MS	480.31	339.29	-	-	479.301	C23H46NO7P	[M+H]+	LysoPE 18:1(2n isomer)*	溶血磷脂酰乙醇胺 18:1(2n异构)*	Lipids	脂质	LPE	溶血磷脂酰乙醇胺	-	3	-	-	-	7.6466e+06	7.46947e+06	7.38272e+06	945520	1.00202e+06	1.04951e+06	546418	523937	480841	2.8419e+06	3.42035e+06	3.22256e+06	-	-	-	-
Lmhp010757	UPLC-MS/MS	506.32	365.31	-	-	505.317	C25H48NO7P	[M+H]+	LysoPE 20:2	溶血磷脂酰乙醇胺 20:2	Lipids	脂质	LPE	溶血磷脂酰乙醇胺	-	3	-	-	-	146120	139663	117823	104866	103706	103041	88513.6	98676.3	49943	79949.3	104826	93156.7	-	-	-	-
Lmhp010514	UPLC-MS/MS	506.32	365.31	-	-	505.317	C25H48NO7P	[M+H]+	LysoPE 20:2(2n isomer)	溶血磷脂酰乙醇胺 20:2(2n异构)	Lipids	脂质	LPE	溶血磷脂酰乙醇胺	-	3	-	-	-	237728	293151	303581	36513.4	34868.4	50287.1	33335.4	6667.08	6667.08	88415.5	135175	106174	-	-	-	-
Lmhp010040	UPLC-MS/MS	504.31	363.29	-	-	503.301	C25H46NO7P	[M+H]+	LysoPE 20:3*	溶血磷脂酰乙醇胺 20:3*	Lipids	脂质	LPE	溶血磷脂酰乙醇胺	-	3	-	-	-	655295	648802	672975	23959.7	9786.92	30894.5	1957.38	1957.38	1957.38	199219	288290	264442	-	-	-	-
Lmhp009802	UPLC-MS/MS	504.31	363.29	-	-	503.301	C25H46NO7P	[M+H]+	LysoPE 20:3(2n isomer)*	溶血磷脂酰乙醇胺 20:3(2n异构)*	Lipids	脂质	LPE	溶血磷脂酰乙醇胺	-	3	-	-	-	566312	680293	662284	26095.5	24420.5	27470.5	4884.1	4884.1	4884.1	192090	266377	240596	-	-	-	-
Lmhp009497	UPLC-MS/MS	502.29	361.27	-	-	501.286	C25H44NO7P	[M+H]+	LysoPE 20:4*	溶血磷脂酰乙醇胺 20:4*	Lipids	脂质	LPE	溶血磷脂酰乙醇胺	-	3	-	-	-	409187	384452	386011	26227.7	25318.4	15358.9	3071.77	3071.77	3071.77	168614	142431	178941	-	-	-	-
Lmhp009349	UPLC-MS/MS	502.29	361.27	-	-	501.286	C25H44NO7P	[M+H]+	LysoPE 20:4(2n isomer)*	溶血磷脂酰乙醇胺 20:4(2n异构)*	Lipids	脂质	LPE	溶血磷脂酰乙醇胺	-	3	-	-	-	388169	365229	413648	21339.9	21940	22099.3	7442.13	5112.45	7727.18	148999	188193	157645	-	-	-	-
Waln010743	UPLC-MS/MS	578.35	279.23	-	-	579.354	C28H54NO9P	[M-H]-	1-(2,3-dihydroxypropoxy)-3-(((2-(dimethylamino)ethoxy)(hydroxy)phosphoryl)oxy)propan-2-yl (11Z,14Z)-octadeca-11,14-dienoate	1-(2,3-二羟基丙氧基)-3-(((2-(二甲基氨基)乙氧基)(羟基)磷酰基)氧基)丙-2-基 (11Z,14Z)-十八碳-11,14-二烯酸	Lipids	脂质	LPE	溶血磷脂酰乙醇胺	-	1	-	-	-	3.60187e+07	3.82155e+07	3.48096e+07	1.53268e+07	1.55416e+07	1.81347e+07	5.00691e+06	4.82494e+06	4.6857e+06	2.26364e+07	2.3827e+07	2.13786e+07	-	-	-	-
Waln009920	UPLC-MS/MS	576.33	277.22	-	-	577.338	C28H52NO9P	[M-H]-	1-(2,3-dihydroxypropoxy)-3-(((2-(dimethylamino)ethoxy)(hydroxy)phosphoryl)oxy)propan-2-yl (8E,11Z,14Z)-octadeca-8,11,14-trienoate	1-(2,3-二羟基丙氧基)-3-(((2-(二甲基氨基)乙氧基)(羟基)磷酰基)氧基)丙-2-基 (8E,11Z,14Z)-十八碳-8,11,14-三烯酸	Lipids	脂质	LPE	溶血磷脂酰乙醇胺	-	1	-	-	-	1.21739e+07	1.25125e+07	1.03755e+07	5.46617e+06	5.26849e+06	6.35995e+06	3.33811e+06	3.49065e+06	3.27893e+06	6.44675e+06	6.97518e+06	6.13269e+06	-	-	-	-
Waln011704	UPLC-MS/MS	580.36	281.25	-	-	581.369	C28H56NO9P	[M-H]-	1-(2,3-dihydroxypropoxy)-3-(((2-(dimethylamino)ethoxy)(hydroxy)phosphoryl)oxy)propan-2-yl (Z)-14-Octadecenoic Acid	1-(2,3-二羟基丙氧基)-3-(((2-(二甲基氨基)乙氧基)(羟基)磷酰基)氧基)丙-2-基 (Z)-14-十八碳烯酸	Lipids	脂质	LPE	溶血磷脂酰乙醇胺	-	1	-	-	-	3.78107e+06	3.91267e+06	3.70972e+06	963066	1.01627e+06	1.16443e+06	942839	908349	888421	2.22839e+06	2.26645e+06	1.96879e+06	-	-	-	-
Waln011009	UPLC-MS/MS	578.34	279.23	-	-	579.354	C28H54NO9P	[M-H]-	2-(2,3-dihydroxypropoxy)-3-(((2-(dimethylamino)ethoxy)(hydroxy)phosphoryl)oxy)propyl (11Z,14Z)-octadeca-11,14-dienoate	2-(2,3-二羟基丙氧基)-3-(((2-(二甲基氨基)乙氧基)(羟基)磷酰基)氧基)丙基 (11Z,14Z)-十八碳-11,14-二烯酸	Lipids	脂质	LPE	溶血磷脂酰乙醇胺	-	1	-	-	-	3.48037e+07	3.82815e+07	3.42644e+07	1.55501e+07	1.5881e+07	1.86768e+07	5.01222e+06	4.83942e+06	4.42804e+06	2.3304e+07	2.39326e+07	2.1163e+07	-	-	-	-
Waln010192	UPLC-MS/MS	576.33	277.22	-	-	577.338	C28H52NO9P	[M-H]-	2-(2,3-dihydroxypropoxy)-3-(((2-(dimethylamino)ethoxy)(hydroxy)phosphoryl)oxy)propyl (8E,11Z,14Z)-octadeca-8,11,14-trienoate	2-(2,3-二羟基丙氧基)-3-(((2-(二甲基氨基)乙氧基)(羟基)磷酰基)氧基)丙基 (8E,11Z,14Z)-十八碳-8,11,14-三烯酸	Lipids	脂质	LPE	溶血磷脂酰乙醇胺	-	1	-	-	-	1.07264e+07	1.26067e+07	1.10049e+07	5.12828e+06	5.52463e+06	6.58017e+06	3.45899e+06	3.4547e+06	3.31778e+06	6.69449e+06	6.71147e+06	6.12853e+06	-	-	-	-
Waln011524	UPLC-MS/MS	554.35	255.23	-	-	555.354	C26H54NO9P	[M-H]-	1-(2,3-dihydroxypropoxy)-3-(((2-(dimethylamino)ethoxy)(hydroxy)phosphoryl)oxy)propan-2-yl palmitate	1-(2,3-二羟基丙氧基)-3-(((2-(二甲基氨基)乙氧基)(羟基)磷酰基)氧基)丙-2-基 棕榈酸酯	Lipids	脂质	LPE	溶血磷脂酰乙醇胺	-	1	-	-	-	1.81876e+06	1.79582e+06	1.75634e+06	1.36331e+06	1.12536e+06	1.29152e+06	2.4634e+06	2.40049e+06	2.24633e+06	1.77574e+06	1.85144e+06	1.81064e+06	-	-	-	-
WaYn011395	UPLC-MS/MS	580.36	281.25	-	-	581.369	C28H56NO9P	[M-H]-	2-(2,3-dihydroxypropoxy)-3-(((2-(dimethylamino)ethoxy)(hydroxy)phosphoryl)oxy)propan-2-yl (Z)-14-Octadecenoic Acid	2-(2,3-二羟基丙氧基)-3-(((2-(二甲基氨基)乙氧基)(羟基)磷酰基)氧基)丙-2-基 (Z)-14-十八碳烯酸	Lipids	脂质	LPE	溶血磷脂酰乙醇胺	-	1	-	-	-	3.32805e+06	3.90363e+06	3.52594e+06	926341	1.01624e+06	1.03699e+06	575534	601820	970063	2.163e+06	2.11225e+06	1.91377e+06	-	-	-	-
Waln010449	UPLC-MS/MS	552.33	253.22	-	-	553.338	C26H52NO9P	[M-H]-	1-(2,3-dihydroxypropoxy)-3-(((2-(dimethylamino)ethoxy)(hydroxy)phosphoryl)oxy)propan-2-yl (E)-hexadec-9-enoate	1-(2,3-二羟基丙氧基)-3-(((2-(二甲基氨基)乙氧基)(羟基)磷酰基)氧基)丙-2-基 (E)-9-十六碳烯酸	Lipids	脂质	LPE	溶血磷脂酰乙醇胺	-	2	-	-	-	503340	516590	457844	133420	163406	154980	36228.8	105148	101326	256753	267437	214705	-	-	-	-
WaYn010475	UPLC-MS/MS	552.33	253.22	-	-	553.338	C26H52NO9P	[M-H]-	2-(2,3-dihydroxypropoxy)-3-(((2-(dimethylamino)ethoxy)(hydroxy)phosphoryl)oxy)propan-2-yl (E)-hexadec-9-enoate	2-(2,3-二羟基丙氧基)-3-(((2-(二甲基氨基)乙氧基)(羟基)磷酰基)氧基)丙-2-基 (E)-9-十六碳烯酸	Lipids	脂质	LPE	溶血磷脂酰乙醇胺	-	2	-	-	-	500387	523848	489065	152047	113029	165486	111446	53312	105454	261667	241933	232298	-	-	-	-
Lhhp101902	UPLC-MS/MS	347.1	185.05	-	-	346.09	C14H18O10	[M+H]+	Polygoacetophenoside	夜交藤乙酰苯苷	Tannins	鞣质	Tannin	鞣质	-	2	-	-	-	73938.1	69091.3	103450	136964	147869	212106	32742.8	43698.3	35265.8	66669.7	84873	71516.5	-	-	-	-
Hmln001302	UPLC-MS/MS	649.07	169.01	-	-	650.076	C27H22O19	[M-H]-	Furosin	夫罗星鞣质	Tannins	鞣质	Tannin	鞣质	81552-37-6	3	-	-	-	1466.36	7331.82	12233.2	10995	15569.8	12873.6	53299.2	72324.1	93377.7	46690.2	35756.7	42118.1	-	-	-	-
MWSmce409	UPLC-MS/MS	953.091	300.998	-	-	954.097	C41H30O27	[M-H]-	Chebulagic acid	诃黎勒酸	Tannins	鞣质	Tannin	鞣质	23094-71-5	3	-	-	-	1781.82	17814.9	1781.82	18923.1	1781.82	1781.82	1781.82	1781.82	1781.82	12250.5	8909.12	15585.1	C10214	-	C10214	-
Lmzn006169	UPLC-MS/MS	471.35	471.35	-	-	472.355	C30H48O4	[M-H]-	Pomolic acid*	坡模酸*	Terpenoids	萜类	Triterpene	三萜	13849-91-7	3	-	-	-	8.63624e+07	8.95259e+07	7.82582e+07	8.7149e+07	89467301	9.36836e+07	7.86915e+07	7.53698e+07	7.86338e+07	8.27529e+07	8.33278e+07	8.02811e+07	-	-	-	-
pmp000438	UPLC-MS/MS	443.39	425.38	-	-	442.381	C30H50O2	[M+H]+	3,28-Dihydroxylup-20(29)-ene (Betulin)	3,28-二羟基羽扇豆-20(29)-烯 (白桦脂醇)	Terpenoids	萜类	Triterpene	三萜	473-98-3	3	-	-	-	1.03307e+06	1.1674e+06	1.04955e+06	90264.7	128923	126957	98039.9	115053	87050.6	373345	380814	359476	C08618	-	C08618	-
Lmyp006119	UPLC-MS/MS	425.38	217.19	-	-	424.37	C30H48O	[M+H]+	Olean-12-en-3-one (β-Amyrone)	齐墩果-12-烯-3-酮 (β-香树脂酮)	Terpenoids	萜类	Triterpene	三萜	638-97-1	3	-	-	-	564879	595940	565951	55982.8	83440.7	81117.9	105408	106390	98218.7	223618	270679	281045	-	-	-	-
Lmxp013125	UPLC-MS/MS	649.41	437.34	-	-	648.403	C40H56O7	[M+H]+	Eucalyptolic acid	Eucalyptolic acid	Terpenoids	萜类	Triterpene	三萜	189272-68-2	3	-	-	-	481132	452503	475827	22124.4	22463.6	18892	25099.6	22051	13487.3	103425	202056	182439	-	-	-	-
Zjmp102701	UPLC-MS/MS	489.36	407.33	-	-	488.35	C30H48O5	[M+H]+	2,3,23-Trihydroxyolean-12-en-28-oic acid (Arjunolic acid)	2,3,23-三羟基齐墩果-12-烯-28-酸 (Arjunolic acid)	Terpenoids	萜类	Triterpene	三萜	465-00-9	3	-	-	-	167340	183323	152952	71092	69420	89472.5	65131.6	62301.5	55221.3	92107.3	70138.9	59552.6	-	-	-	-
Zmsn002533	UPLC-MS/MS	375.13	125.06	-	-	376.137	C16H24O10	[M-H]-	6a-dihydrocornic acid	6a-dihydrocornic acid	Others	其它类	Others	其它	-	3	-	-	-	2.88198e+06	3.35102e+06	3.03104e+06	690837	503605	664003	224374	269787	242809	1.1559e+06	1.13324e+06	1.18515e+06	-	-	-	-
Lmzp009620	UPLC-MS/MS	635.39	453.33	-	-	634.387	C39H54O7	[M+H]+	2-Hydroxypyracrenic acid	2-羟基圆齿火棘酸	Terpenoids	萜类	Triterpene	三萜	-	1	-	-	-	6.00737e+06	6.25804e+06	6.14885e+06	3.09677e+06	3.04378e+06	3.71894e+06	3.16927e+06	2.88875e+06	2.675e+06	3.93721e+06	3.8403e+06	3.72975e+06	-	-	-	-
Zasp009163	UPLC-MS/MS	455.35	203.18	-	-	454.345	C30H46O3	[M+H]+	Mudanpinoic acid A	牡丹皮酸A	Terpenoids	萜类	Triterpene	三萜	203511-36-8	1	-	-	-	2.54112e+06	2.52958e+06	2.51952e+06	2.14867e+06	2.13087e+06	2.37942e+06	1.21316e+06	1.16486e+06	1.14218e+06	1.84559e+06	1.72976e+06	1.8818e+06	-	-	-	-
Ymjm000099	UPLC-MS/MS	453.34	201.17	-	-	452.329	C30H44O3	[M+H]+	3-Oxooleana-11,13(18)-dien-28-oic acid	3-羰基齐墩果-11,13(18)-二烯-28-酸	Terpenoids	萜类	Triterpene	三萜	-	1	-	-	-	5.4381e+06	5.88236e+06	5.02723e+06	2.79874e+06	2.74949e+06	3.01836e+06	1.75429e+06	1.78101e+06	1.64768e+06	2.95487e+06	2.88504e+06	2.79664e+06	-	-	-	-
Lszp210002	UPLC-MS/MS	489.36	453.34	-	-	488.35	C30H48O5	[M+H]+	3,19,23-Trihydroxyurs-12-en-28-oic acid (Barbinervic acid)	3,19,23-三羟基熊果-12-烯-28-酸 (马尾柴酸)	Terpenoids	萜类	Triterpene	三萜	-	2	-	-	-	2.01614e+06	2.89512e+06	2.40185e+06	72145.6	121526	92559.1	21403.5	30633.5	22105.7	350429	632919	707185	-	-	-	-
pmp000782	UPLC-MS/MS	635.39	435.32	-	-	634.387	C39H54O7	[M+H]+	Caffeoylmaslinic Acid	咖啡酰山楂酸	Terpenoids	萜类	Triterpene	三萜	-	2	-	-	-	761989	598677	721665	302536	334312	314525	332919	299499	316073	459592	479472	392775	-	-	-	-
Smpp009685	UPLC-MS/MS	651.38	163.03	-	-	650.382	C39H54O8	[M+H]+	3-O-Cafeoyltormentic acid	3-O-咖啡酰委陵菜酸	Terpenoids	萜类	Triterpene	三萜	-	2	-	-	-	1.34815e+06	1.58965e+06	1.55327e+06	690971	918263	1.00128e+06	1.00814e+06	973156	970107	1.13174e+06	1.17478e+06	1.28703e+06	-	-	-	-
pmp000263	UPLC-MS/MS	455.35	409.35	-	-	454.345	C30H46O3	[M+H]+	3-Hydroxyurs-12,19-dien-28-oic acid (Sanguisorbigenin)	3-羟基熊果-12,19-二烯-28-酸 (地榆皂苷元)	Terpenoids	萜类	Triterpene	三萜	-	2	-	-	-	4.66575e+06	4.42429e+06	4.11307e+06	3.83044e+06	3.6554e+06	4.25004e+06	2.39803e+06	2.11531e+06	2.09846e+06	3.30328e+06	3.05376e+06	3.07484e+06	-	-	-	-
Zjmp102710	UPLC-MS/MS	471.35	201.16	-	-	470.34	C30H46O4	[M+H]+	3-Hydroxy-29(or30)-al-olean-12-en-28-oic acid	3-羟基-29(or30)-醛-齐墩果-12-烯-28-酸	Terpenoids	萜类	Triterpene	三萜	-	2	-	-	-	313803	335251	305086	250990	274258	282946	47538.6	46130.2	48644.9	171035	199387	169457	-	-	-	-
Lssp210085	UPLC-MS/MS	439.36	203.18	-	-	438.35	C30H46O2	[M+H]+	3,11-dioxo-β-oleorene	3,11-二氧-β-香树脂烯	Terpenoids	萜类	Triterpene	三萜	-	2	-	-	-	359359	452962	421224	114244	123130	113616	88281.2	118713	109567	151026	203222	192603	-	-	-	-
Smnp012194	UPLC-MS/MS	619.39	437.34	-	-	618.392	C39H54O6	[M+H]+	2ɑ-hydroxy-3β-trans-p-hydroxycinnamoyloxy oleanolic acid*	2ɑ-羟基-3β-反式对羟基肉桂酰氧基齐墩果酸*	Terpenoids	萜类	Triterpene	三萜	-	2	-	-	-	304034	316321	304951	15335.9	15218.4	14702.7	17745.2	16741.8	9232.1	84472.6	137357	126102	-	-	-	-
Yshs000048	UPLC-MS/MS	471.34	407.33	-	-	470.34	C30H46O4	[M+H]+	6-Hydroxy-lupane-20(29)-en-3-one-28-oic acid	6-羟基羽扇豆烷-20(29)-烯-3-酮-28-酸	Terpenoids	萜类	Triterpene	三萜	-	2	-	-	-	216781	219323	209463	147244	173844	166983	36993.1	36464.4	29367.8	119117	110601	96863.7	-	-	-	-
pmp000781	UPLC-MS/MS	619.4	437.34	-	-	618.392	C39H54O6	[M+H]+	p-Coumaroyleuscaphic acid*	对香豆酰蔷薇酸*	Terpenoids	萜类	Triterpene	三萜	-	2	-	-	-	442196	543624	505247	20843.9	22374.6	26149.2	24732.2	32596.3	17669.8	127141	252530	206149	-	-	-	-
Zjmp102717	UPLC-MS/MS	473.36	189.16	-	-	472.355	C30H48O4	[M+H]+	2,3-Dihydroxyolean-12-en-28-oic acid	2,3-二羟基齐墩果-12-烯-28-酸	Terpenoids	萜类	Triterpene	三萜	-	2	-	-	-	517023	972651	690162	1437.32	1437.32	1437.32	7186.61	7664.3	8781.85	118013	138635	161721	-	-	-	-
pmp000439	UPLC-MS/MS	453.34	435.33	-	-	452.329	C30H44O3	[M+H]+	3-Hydroxyurs-5(6),12,18(19)-trien-28-oic acid (Uncargenin B)	3-羟基熊果-5(6),12,18(19)-三烯-28-酸 (钩藤苷元 B)	Terpenoids	萜类	Triterpene	三萜	-	2	-	-	-	785902	876740	777252	196572	174618	152893	30578.7	30578.7	30578.7	370745	313770	337165	-	-	-	-
Wdzp011630	UPLC-MS/MS	457.37	205.16	-	-	456.36	C30H48O3	[M+H]+	11-deoxyalisol B	11-去氧泽泻醇B	Terpenoids	萜类	Triterpene	三萜	-	2	-	-	-	119592	132677	106971	7122.16	7122.16	7122.16	7122.16	7122.16	7122.16	35610.8	41910.7	38623	-	-	-	-
Zjmp102705	UPLC-MS/MS	473.36	409.35	-	-	472.355	C30H48O4	[M+H]+	3,29-Dihydroxyolean-12-en-28-oic acid (Mesembryanthemoidigenic acid)	3,29-二羟基齐墩果-12-烯-28-酸 (桦叶菊萜酸)	Terpenoids	萜类	Triterpene	三萜	4871-87-8	2	-	-	-	134306	201934	214442	48516.1	39863.5	56435.1	13097.1	25286.3	31008.6	62747.1	86528.3	66979.2	-	-	-	-
Lmzp010525	UPLC-MS/MS	619.4	437.34	-	-	618.392	C39H54O6	[M+H]+	3-O-Caffeoyl-9-hydroxylup-20(30)-en-7-one (Querspicatin A)*	3-O-咖啡酰基-9-羟基羽扇豆-20(30)-烯-7-酮 (Querspicatin A)*	Terpenoids	萜类	Triterpene	三萜	126240-04-8	2	-	-	-	306458	354759	303229	13945.5	16399.1	12017.6	15694.2	13599.9	10309	82852.3	142197	145887	-	-	-	-
Sazp010510	UPLC-MS/MS	619.4	437.34	-	-	618.392	C39H54O6	[M+H]+	3-O-Trans-p-Coumaroylmaslinic Acid*	3-O-对香豆酰马斯里酸*	Terpenoids	萜类	Triterpene	三萜	35482-91-8	2	-	-	-	346341	320665	324993	13275.8	18279.2	21613.2	16972.5	19409.9	11098.6	94818.6	132896	141848	-	-	-	-
Lamp010080	UPLC-MS/MS	457.37	421.35	-	-	456.36	C30H48O3	[M+H]+	Niloticin	尼罗河金银楝素	Terpenoids	萜类	Triterpene	三萜	115404-57-4	2	-	-	-	540090	558440	490483	54956.4	77987.9	82599.8	49473.5	54111.9	69287.9	212343	206460	123154	-	-	-	-
pmf0085	UPLC-MS/MS	427.39	345.32	-	-	426.386	C30H50O	[M+H]+	9,19-Cyclolanost-24-en-3-ol (Cycloartenol)	9,19-环羊毛甾-24-烯-3-醇 (环阿尔廷醇)	Terpenoids	萜类	Triterpene	三萜	469-38-5	3	-	-	-	47657.6	45461.9	44239.7	57432.5	60205.5	61651.2	44063.2	38490.2	43821.8	49319.9	50138.3	49206	C01902	ko00100,ko01100,ko01110	C01902	-
pmp000529	UPLC-MS/MS	471.35	425.2	-	-	470.34	C30H46O4	[M+H]+	21,23:24,25-Diepoxy-21-hydroxylanost-7-en-3-one (Melianone)	21,23:24,25-二环氧-21-羟基羊毛甾-7-烯-3-酮 (苦柬子酮)	Terpenoids	萜类	Triterpene	三萜	6553-27-1	3	-	-	-	286239	249410	246603	16817.9	16817.9	16817.9	16817.9	16817.9	16817.9	103677	99986.8	84089.6	-	-	-	-
pmp000441	UPLC-MS/MS	471.35	453.34	-	-	470.34	C30H46O4	[M+H]+	3-Hydroxy-11-oxours-12-en-28-oic acid (11-Keto-ursolic acid)	3-羟基-11-氧代熊果-12-烯-28-酸 (11-酮基-熊果酸)	Terpenoids	萜类	Triterpene	三萜	105870-59-5	3	-	-	-	1.16286e+06	1.23916e+06	1.15123e+06	386152	415213	402082	138156	95779.7	110432	518404	557103	532380	-	-	-	-
Hmcp005535	UPLC-MS/MS	425.38	191.17	-	-	424.37	C30H48O	[M+H]+	α-Amyrenone	α-香树脂酮	Terpenoids	萜类	Triterpene	三萜	638-96-0	3	-	-	-	1.05735e+06	1.05375e+06	977098	106119	164144	156300	108212	134513	114923	392837	441136	426789	-	-	-	-
Lmsp009971	UPLC-MS/MS	473.33	203.14	-	-	472.319	C29H44O5	[M+H]+	1,19-Dihydroxy-2-oxo-nor-A(3)-urs-12-en-28-oic acid (Rubuminatus B)	1,19-二羟基-2-氧代-去甲基-A(3)-熊果-12-烯-28-酸 (Rubuminatus B)	Terpenoids	萜类	Triterpene	三萜	-	3	-	-	-	486230	496040	595820	53043.7	49837.9	40753.9	8150.79	8150.79	8150.79	172201	196510	232629	-	-	-	-
Smpp011773	UPLC-MS/MS	619.39	147.04	-	-	618.392	C39H54O6	[M+H]+	3-O-p-Coumaroyl-2-hydroxyurs-12-en-28-oic acid	3-O-对香豆酰基-2-羟基熊果-12-烯-28-酸	Terpenoids	萜类	Triterpene	三萜	-	3	-	-	-	116840	138971	138339	1080.38	1080.38	1080.38	8187.69	8785.8	5401.92	39379.6	40684.6	72615.6	-	-	-	-
Zmyp009944	UPLC-MS/MS	443.39	191.18	-	-	442.381	C30H50O2	[M+H]+	D-Friedoolean-14-ene-3,28-diol (Myricadiol)	异齐墩果烷-14-烯-3,28-二醇 (杨梅萜二醇)	Terpenoids	萜类	Triterpene	三萜	-	3	-	-	-	25754.1	52806.8	55261	1266.81	1266.81	6334.07	1266.81	1266.81	1266.81	13591.5	21619.5	13756	-	-	-	-
mws4053	UPLC-MS/MS	455.35	455.35	-	-	456.36	C30H48O3	[M-H]-	3-Hydroxyurs-12-en-28-oic acid (Ursolic acid)*	3-羟基熊果-12-烯-28-酸 (熊果酸)*	Terpenoids	萜类	Triterpene	三萜	77-52-1	1	-	-	-	2.83266e+07	2.95103e+07	2.84022e+07	1.31077e+07	1.31093e+07	1.49919e+07	1.45324e+07	1.13603e+07	1.05735e+07	1.67627e+07	1.64352e+07	1.48148e+07	C08988	-	C08988	-
Lmmn009550	UPLC-MS/MS	453.34	453.34	-	-	454.345	C30H46O3	[M-H]-	3-Oxo-9,19-cyclolanost-24-en-26-oic acid (Mangiferonic acid)*	3-氧代-9,19-环羊毛甾-24-烯-26-酸 (杧果酮酸)*	Terpenoids	萜类	Triterpene	三萜	13878-90-5	1	-	-	-	384693	455502	464134	196620	200623	165818	205067	216400	204188	225922	227505	223385	-	-	-	-
Hmjn003948	UPLC-MS/MS	487.35	487.35	-	-	488.35	C30H48O5	[M-H]-	2,3,6-Trihydroxyurs-12-en-28-oic acid (Madasiatic acid)*	2,3,6-三羟基熊果-12-烯-28-酸 (马达积雪草酸)*	Terpenoids	萜类	Triterpene	三萜	26532-66-1	1	-	-	-	3.51296e+07	33999435	2.85546e+07	1.89079e+07	1.87995e+07	1.95197e+07	1.3786e+07	1.27594e+07	1.4378e+07	1.94065e+07	1.91736e+07	1.68275e+07	-	-	-	-
Lmgn010741	UPLC-MS/MS	485.33	455.32	-	-	486.334	C30H46O5	[M-H]-	2α,3α,23-Trihydroxyurs-12,20(30)-dien-28-oic acid*	2α,3α,23-三羟基熊果-12,20(30)-二烯-28-酸*	Terpenoids	萜类	Triterpene	三萜	143839-01-4	1	-	-	-	216465	253231	221591	54334.9	68290.3	54023.1	67560.9	75754.7	39526.8	103179	117070	105691	-	-	-	-
Hmln003398	UPLC-MS/MS	503.34	485.33	-	-	504.345	C30H48O6	[M-H]-	2,3,19,23-Tetrahydroxyurs-12-en-28-oic acid	2,3,19,23-四羟基熊果-12-烯-28-酸	Terpenoids	萜类	Triterpene	三萜	-	2	-	-	-	283518	296213	242601	345475	182683	135809	406506	420476	144708	168664	310403	184843	-	-	-	-
Lmsn011201	UPLC-MS/MS	485.33	455.32	-	-	486.334	C30H46O5	[M-H]-	2,3-Dihydroxy-19-oxo-18,19-secours-11,13(18)-dien-28-oic acid (Swinhoeic acid)*	2,3-二羟基-19-羰基-18,19-开环熊果-11,13(18)-二烯-28-酸 (Swinhoeic acid)*	Terpenoids	萜类	Triterpene	三萜	-	1	-	-	-	245221	247404	230223	126508	153080	147776	60371.9	70040.2	65317.2	115280	107615	112400	-	-	-	-
Lmsn011015	UPLC-MS/MS	485.33	455.32	-	-	486.334	C30H46O5	[M-H]-	1-Oxo-Siaresinolic acid*	1-羰基-泰国树脂酸*	Terpenoids	萜类	Triterpene	三萜	-	1	-	-	-	225150	240573	192149	54732.1	58444.2	51225.6	75671.1	71091.5	62889.5	110551	106568	97468.5	-	-	-	-
Lmzn006582	UPLC-MS/MS	469.34	469.34	-	-	470.34	C30H46O4	[M-H]-	2-Formyl-3-hydroxy-A(1)-norlup-20(29)-en-28-oic acid (Colubrinic acid)	2-甲酰-3-羟基-A(1)-去甲基羽扇豆-20(29)-烯-28-酸 (Colubrinic acid)	Terpenoids	萜类	Triterpene	三萜	-	2	-	-	-	4.14615e+06	4.13355e+06	3.56322e+06	6.91221e+06	6.8413e+06	7.35392e+06	2.48841e+06	2.46963e+06	2.01814e+06	3627412	3.91107e+06	3.58823e+06	-	-	-	-
Zbqn008291	UPLC-MS/MS	473.36	473.36	-	-	474.371	C30H50O4	[M-H]-	3,13,15-Trihydroxyoleanane-12-one	3,13,15-三羟基齐墩果烷-12-酮	Terpenoids	萜类	Triterpene	三萜	-	2	-	-	-	8.27364e+06	8.5588e+06	6.94117e+06	7.91933e+06	8.14035e+06	8.43337e+06	7.22541e+06	6.96838e+06	6.64573e+06	7.39035e+06	7.55411e+06	7.09418e+06	-	-	-	-
Hmdn006685	UPLC-MS/MS	455.35	455.35	-	-	456.36	C30H48O3	[M-H]-	3,4-Cycloopen-cycloaltin-4(29),25-diene-24(S)-hydroxy-3-carboxylic acid*	3,4-开环-环阿尔廷-4(29),25-二烯-24(S)-羟基-3-羧酸*	Terpenoids	萜类	Triterpene	三萜	-	2	-	-	-	390521	329383	478531	159664	177418	196644	138355	167363	167469	244450	249805	259420	-	-	-	-
Hmdn006855	UPLC-MS/MS	455.35	455.35	-	-	456.36	C30H48O3	[M-H]-	3,4-Cycloopen-cycloaltin-4(29),25-diene-24(R)-hydroxy-3-carboxylic acid	3,4-开环-环阿尔廷-4(29),25-二烯-24(R)-羟基-3-羧酸	Terpenoids	萜类	Triterpene	三萜	-	2	-	-	-	399649	341781	446511	158965	164005	202657	135814	163338	170572	238549	273837	279255	-	-	-	-
Smpn009230	UPLC-MS/MS	487.34	487.34	-	-	488.35	C30H48O5	[M-H]-	2,3,23-Trihydroxyolean-12-en-28-oic acid*	2,3,23-三羟基齐墩果-12-烯-28-酸*	Terpenoids	萜类	Triterpene	三萜	-	1	-	-	-	3.47235e+07	3.55256e+07	2.73818e+07	2.01425e+07	1.92586e+07	2.14591e+07	1.4071e+07	1.47413e+07	1.45312e+07	2.00896e+07	2.04922e+07	1.91406e+07	-	-	-	-
Smpn011792	UPLC-MS/MS	471.35	471.34	-	-	472.355	C30H48O4	[M-H]-	2,3-Dihydroxy-12-ursen-28-oic acid*	2,3-二羟基-12-熊果烯-28-酸*	Terpenoids	萜类	Triterpene	三萜	-	3	-	-	-	4.41568e+07	4.83578e+07	4.08076e+07	4.55688e+07	4.66266e+07	4.80102e+07	3.99376e+07	3.95329e+07	3.90377e+07	4.16663e+07	4.17101e+07	3.8559e+07	-	-	-	-
pmn001708	UPLC-MS/MS	487.34	425.34	-	-	488.35	C30H48O5	[M-H]-	2,3,23-Trihydroxyurs-12-en-28-oic acid (Asiatic acid)	2,3,23-三羟基熊果-12-烯-28-酸 (积雪草酸)	Terpenoids	萜类	Triterpene	三萜	464-92-6	2	-	-	-	5153.34	5153.34	5153.34	29381.7	29035.4	25766.7	135763	130314	109317	62241.5	63788.5	52646.9	C08617	-	C08617	-
Hmjn008136	UPLC-MS/MS	469.33	469.33	-	-	470.34	C30H46O4	[M-H]-	2,3-Dihydroxyoleana-11,13(18)-dien-28-oic acid (Camaldulenic acid)	2,3-二羟基齐墩果-11,13(18)-二烯-28-酸 (脱氢山楂酸)	Terpenoids	萜类	Triterpene	三萜	71850-15-2	2	-	-	-	3.79121e+06	4.1164e+06	3.34023e+06	3.8e+06	3.96388e+06	4.51089e+06	1.217e+06	1.04493e+06	1.11861e+06	3.0187e+06	2.93627e+06	2.82657e+06	-	-	-	-
Lmzn006284	UPLC-MS/MS	471.35	471.35	-	-	472.355	C30H48O4	[M-H]-	2-Hydroxyursolic acid*	2-羟基熊果酸*	Terpenoids	萜类	Triterpene	三萜	-	3	-	-	-	3.56388e+07	3.43929e+07	2.98653e+07	7.26833e+06	8.33269e+06	6.26816e+06	1.1656e+07	1.07363e+07	1.13789e+07	1.89998e+07	1.94906e+07	1.79265e+07	-	-	-	-
mws1389	UPLC-MS/MS	455.35	455.35	-	-	456.36	C30H48O3	[M-H]-	3-Hydroxyolean-12-en-28-oic acid (Oleanolic acid)*	3-羟基齐墩果-12-烯-28-酸 (齐墩果酸)*	Terpenoids	萜类	Triterpene	三萜	508-02-1	2	-	-	-	2.99843e+07	3.16025e+07	3.08744e+07	1.40787e+07	1.57708e+07	1.61009e+07	1.55053e+07	1.22678e+07	1.23341e+07	1.64533e+07	1.87532e+07	1.58324e+07	C17148	ko00999,ko01100,ko01110	C17148	-
Hmdn006566	UPLC-MS/MS	455.35	455.35	-	-	456.36	C30H48O3	[M-H]-	3,4-Open loop-lupine-4(23),20(29)-diene-24-hydroxy-3-carboxylic acid*	3,4-开环-羽扇豆-4(23),20(29)-二烯-24-羟基-3-羧酸*	Terpenoids	萜类	Triterpene	三萜	-	2	-	-	-	331903	338424	415769	157824	169653	192880	137993	168481	161169	238349	242978	264665	-	-	-	-
Lmhn011365	UPLC-MS/MS	455.35	455.35	-	-	456.36	C30H48O3	[M-H]-	Morolic acid*	模绕酸*	Terpenoids	萜类	Triterpene	三萜	559-68-2	2	-	-	-	3.10586e+07	3.07606e+07	2.98067e+07	1.44851e+07	1.51773e+07	1.54683e+07	1.33797e+07	1.1476e+07	1.28039e+07	1.715e+07	1.70319e+07	1.62305e+07	-	-	-	-
Qmfp122209	UPLC-MS/MS	635.39	453.33	-	-	634.387	C39H54O7	[M+H]+	24-p-Coumaroyloxy-2,3-dihydroxyurs-12-en-28-oic acid (Guavacoumaric acid)	24-对香豆酰氧基-2,3-二羟基熊果-12-烯-28-酸 (Guavacoumaric acid)	Terpenoids	萜类	Triterpene	三萜	-	2	-	-	-	45082.2	43248.9	52858.3	43548.5	39521.7	45234.3	21532.2	23493.7	23201.9	32762.7	33030.5	33606.9	-	-	-	-
mws4030	UPLC-MS/MS	475.38	391.28	-	-	476.387	C30H52O4	[M-H]-	Dammar-24-ene-3,6,12,20-tetrol (Protopanaxatriol)	达玛烷-24-烯-3,6,12,20-四醇 (原人参萜三醇)	Terpenoids	萜类	Triterpene	三萜	34080-08-5	2	-	-	-	607238	589046	684297	71247.1	72644	98171.7	61881.2	56496.6	50581	295265	320597	246253	C20716	ko00999,ko01110	C20716	-
Lmmn008971	UPLC-MS/MS	455.35	455.35	-	-	456.36	C30H48O3	[M-H]-	3-Hydroxycycloarta-24-ene-26-oic acid (Isomangiferolic acid)*	3-羟基环木菠萝烷-24-烯-26-酸 (异杧果醇酸)*	Terpenoids	萜类	Triterpene	三萜	13878-92-7	1	-	-	-	2.98546e+07	3.24802e+07	3.24247e+07	1.40646e+07	1.55487e+07	1.56935e+07	1.44191e+07	1.25396e+07	1.26789e+07	1.74998e+07	1.78735e+07	1.68946e+07	-	-	-	-
[truncated: 1,447 more rows]
