# Supplementary material for: Integrated metabolomic and transcriptomic analysis of Pogostemon cablin shed new light on the complete biosynthesis pathway of pogostone
Source: Front Plant Sci. 2025 Feb 17;16:1510184. doi: 10.3389/fpls.2025.1510184 (PMC11872920; doi:10.3389/fpls.2025.1510184)
Supplement: Supplementary Table 4 — Candidate differentially expressed genes involved in the biosynthesis of bioactive compounds. [file Table4.xlsx]

## Sheet: Key DEG terpenoid
ID	chr	start	end	strand	KEGG	Leaf_vs_Stem.regulated	Root_vs_Leaf.regulated	Root_vs_Stem.regulated	KEGG pathway	NR	Swissprot	Tremble	KOG	GO	Pfam	Root-1_fpkm	Root-2_fpkm	Root-3_fpkm	Stem-1_fpkm	Stem-2_fpkm	Stem-3_fpkm	Leaf-1_fpkm	Leaf-2_fpkm	Leaf-3_fpkm	Root_vs_Stem.log2FoldChange	Root_vs_Stem.pvalue	Root_vs_Stem.padj	Root_vs_Leaf.log2FoldChange	Root_vs_Leaf.pvalue	Root_vs_Leaf.padj	Leaf_vs_Stem.log2FoldChange	Leaf_vs_Stem.pvalue	Leaf_vs_Stem.padj
Patchoulol	EC:4.2.3.70 4.2.3.87 4.2.3.93 patchoulol/alpha-guaiene/delta-guaiene synthase
Pcab051033	scaffold_244	2082	4619	+	K15803 (-)-germacrene D synthase [EC:4.2.3.75] | (RefSeq) LOW QUALITY PROTEIN: bifunctional sesquiterpene synthase 1-like (A)	up	down	FALSE	ko00909: Sesquiterpenoid and triterpenoid biosynthesis	patchoulol synthase variant 1 [Pogostemon cablin]	TPSPS_POGCB RecName: Full=Patchoulol synthase; Short=PatTps177; EC=4.2.3.70 {ECO:0000269|PubMed:16970904, ECO:0000269|PubMed:20148554, ECO:0000269|PubMed:2171435, ECO:0000269|PubMed:3038029}; AltName: Full=Alpha-guaiene synthase; EC=4.2.3.87 {ECO:0000269|PubMed:16970904, ECO:0000269|PubMed:20148554, ECO:0000269|PubMed:2171435}; AltName: Full=Delta-guaiene synthase; EC=4.2.3.93 {ECO:0000269|PubMed…	W8NXF3_POGCB SubName: Full=Patchoulol synthase variant 1 {ECO:0000313|EMBL:AHL24448.1}; EC=4.2.3.70 {ECO:0000313|EMBL:AHL24448.1};	--	GO:0005737,cytoplasm; GO:0000287,magnesium ion binding; GO:0010333,terpene synthase activity; GO:0016102,diterpenoid biosynthetic process; GO:0003674,molecular_function; GO:0005488,binding; GO:0043167,ion binding; GO:0043169,cation binding; GO:0046872,metal ion binding; GO:0003824,catalytic activity; GO:0016829,lyase activity; GO:0016835,carbon-oxygen lyase activity; GO:0016838,carbon-oxygen lyas…	PF03936.19:Terpene synthase family, metal binding domain	257.996	267.964	282.074	153.425	160.497	170.609	2368.96	2280.28	2245.1	0.909699	1.44e-83	1.1e-81	-2.89994	0	0	3.81371	0	0
Pcab069628	scaffold_1095	243852	244124	+	K15803 (-)-germacrene D synthase [EC:4.2.3.75] | (RefSeq) LOW QUALITY PROTEIN: bifunctional sesquiterpene synthase 1-like (A)	up	down	NA	ko00909: Sesquiterpenoid and triterpenoid biosynthesis	RecName: Full=Germacrene D synthase 1; AltName: Full=PatTpsB15 [Pogostemon cablin]	TPGD1_POGCB RecName: Full=Germacrene D synthase 1; EC=4.2.3.75; AltName: Full=PatTpsB15;	A0A866W2X9_POGCB SubName: Full=Patchouli alcohol synthase {ECO:0000313|EMBL:QOE77915.1};	--	GO:0005829,cytosol; GO:0052577,germacrene-D synthase activity; GO:0000287,magnesium ion binding; GO:0010334,sesquiterpene synthase activity; GO:0016102,diterpenoid biosynthetic process; GO:0045338,farnesyl diphosphate metabolic process; GO:0051762,sesquiterpene biosynthetic process; GO:0003674,molecular_function; GO:0003824,catalytic activity; GO:0010333,terpene synthase activity; GO:0016829,lyas…	PF01397.24:Terpene synthase, N-terminal domain	0	0.5125	0	0	0	0	15.7805	11.2736	17.9278	NA	NA	NA	-6.25284	8.22e-09	2.56e-08	8.3839	9.11e-12	4.1e-11
Pcab084383	scaffold_566	545225	545811	+	K15803 (-)-germacrene D synthase [EC:4.2.3.75] | (RefSeq) bifunctional sesquiterpene synthase 1-like (A)	up	down	NA	ko00909: Sesquiterpenoid and triterpenoid biosynthesis	RecName: Full=Patchoulol synthase; Short=PatTps177; AltName: Full=Alpha-guaiene synthase; AltName: Full=Delta-guaiene synthase [Pogostemon cablin]	TPSPS_POGCB RecName: Full=Patchoulol synthase; Short=PatTps177; EC=4.2.3.70 {ECO:0000269|PubMed:16970904, ECO:0000269|PubMed:20148554, ECO:0000269|PubMed:2171435, ECO:0000269|PubMed:3038029}; AltName: Full=Alpha-guaiene synthase; EC=4.2.3.87 {ECO:0000269|PubMed:16970904, ECO:0000269|PubMed:20148554, ECO:0000269|PubMed:2171435}; AltName: Full=Delta-guaiene synthase; EC=4.2.3.93 {ECO:0000269|PubMed…	A0A866W2X9_POGCB SubName: Full=Patchouli alcohol synthase {ECO:0000313|EMBL:QOE77915.1};	--	GO:0005737,cytoplasm; GO:0000287,magnesium ion binding; GO:0010333,terpene synthase activity; GO:0016102,diterpenoid biosynthetic process; GO:0003674,molecular_function; GO:0005488,binding; GO:0043167,ion binding; GO:0043169,cation binding; GO:0046872,metal ion binding; GO:0003824,catalytic activity; GO:0016829,lyase activity; GO:0016835,carbon-oxygen lyase activity; GO:0016838,carbon-oxygen lyas…	PF01397.24:Terpene synthase, N-terminal domain	0	0	0	0	0	0	16.2492	17.8963	20.5817	NA	NA	NA	-8.54606	2.28e-12	9.13e-12	8.82054	3.74e-13	1.83e-12
Pcab090256	scaffold_460	288935	291234	-	K15803 (-)-germacrene D synthase [EC:4.2.3.75] | (RefSeq) bifunctional sesquiterpene synthase 1-like (A)	up	down	NA	ko00909: Sesquiterpenoid and triterpenoid biosynthesis	patchoulol synthase variant 1 [Pogostemon cablin]	TPSPS_POGCB RecName: Full=Patchoulol synthase; Short=PatTps177; EC=4.2.3.70 {ECO:0000269|PubMed:16970904, ECO:0000269|PubMed:20148554, ECO:0000269|PubMed:2171435, ECO:0000269|PubMed:3038029}; AltName: Full=Alpha-guaiene synthase; EC=4.2.3.87 {ECO:0000269|PubMed:16970904, ECO:0000269|PubMed:20148554, ECO:0000269|PubMed:2171435}; AltName: Full=Delta-guaiene synthase; EC=4.2.3.93 {ECO:0000269|PubMed…	W8NXF3_POGCB SubName: Full=Patchoulol synthase variant 1 {ECO:0000313|EMBL:AHL24448.1}; EC=4.2.3.70 {ECO:0000313|EMBL:AHL24448.1};	--	GO:0005737,cytoplasm; GO:0000287,magnesium ion binding; GO:0010333,terpene synthase activity; GO:0016102,diterpenoid biosynthetic process; GO:0003674,molecular_function; GO:0005488,binding; GO:0043167,ion binding; GO:0043169,cation binding; GO:0046872,metal ion binding; GO:0003824,catalytic activity; GO:0016829,lyase activity; GO:0016835,carbon-oxygen lyase activity; GO:0016838,carbon-oxygen lyas…	PF01397.24:Terpene synthase, N-terminal domain	0.3181	0.3194	0	0.1931	0.1027	0.2025	3.747	0.7807	1.6821	NA	NA	NA	-3.06685	0.000608535	0.0011628	3.60323	6.43e-05	0.000158494
Pcab138821	scaffold_3784	43904	46959	+	K15803 (-)-germacrene D synthase [EC:4.2.3.75] | (RefSeq) LOW QUALITY PROTEIN: bifunctional sesquiterpene synthase 1-like (A)	up	down	up	ko00909: Sesquiterpenoid and triterpenoid biosynthesis	patchoulol synthase variant 1 [Pogostemon cablin]	TPSPS_POGCB RecName: Full=Patchoulol synthase; Short=PatTps177; EC=4.2.3.70 {ECO:0000269|PubMed:16970904, ECO:0000269|PubMed:20148554, ECO:0000269|PubMed:2171435, ECO:0000269|PubMed:3038029}; AltName: Full=Alpha-guaiene synthase; EC=4.2.3.87 {ECO:0000269|PubMed:16970904, ECO:0000269|PubMed:20148554, ECO:0000269|PubMed:2171435}; AltName: Full=Delta-guaiene synthase; EC=4.2.3.93 {ECO:0000269|PubMed…	W8NXF3_POGCB SubName: Full=Patchoulol synthase variant 1 {ECO:0000313|EMBL:AHL24448.1}; EC=4.2.3.70 {ECO:0000313|EMBL:AHL24448.1};	--	GO:0005737,cytoplasm; GO:0000287,magnesium ion binding; GO:0010333,terpene synthase activity; GO:0016102,diterpenoid biosynthetic process; GO:0003674,molecular_function; GO:0005488,binding; GO:0043167,ion binding; GO:0043169,cation binding; GO:0046872,metal ion binding; GO:0003824,catalytic activity; GO:0016829,lyase activity; GO:0016835,carbon-oxygen lyase activity; GO:0016838,carbon-oxygen lyas…	PF03936.19:Terpene synthase family, metal binding domain	5.7786	7.092	5.9132	1.8126	2.2999	2.6369	33.8715	35.2883	34.7409	1.65097	1.3e-18	1.9e-17	-2.2749	6.38e-99	1.51e-97	3.93118	8.05e-192	5.05e-190
germacrene D	EC:4.2.3.75 (-)-germacrene D synthase
Pcab084372	scaffold_566	376117	379589	-	K15803 (-)-germacrene D synthase [EC:4.2.3.75] | (RefSeq) LOW QUALITY PROTEIN: bifunctional sesquiterpene synthase 1-like (A)	NA	up	up	ko00909: Sesquiterpenoid and triterpenoid biosynthesis	RecName: Full=Germacrene D synthase 1; AltName: Full=PatTpsB15 [Pogostemon cablin]	TPGD1_POGCB RecName: Full=Germacrene D synthase 1; EC=4.2.3.75; AltName: Full=PatTpsB15;	A0A8F8AJI5_9LAMI SubName: Full=Delta-cadinene synthase {ECO:0000313|EMBL:QXY08397.1}; EC=4.2.3.13 {ECO:0000313|EMBL:QXY08397.1};	--	GO:0005829,cytosol; GO:0052577,germacrene-D synthase activity; GO:0000287,magnesium ion binding; GO:0010334,sesquiterpene synthase activity; GO:0016102,diterpenoid biosynthetic process; GO:0045338,farnesyl diphosphate metabolic process; GO:0051762,sesquiterpene biosynthetic process; GO:0003674,molecular_function; GO:0003824,catalytic activity; GO:0010333,terpene synthase activity; GO:0016829,lyas…	PF01397.24:Terpene synthase, N-terminal domain	5.2653	4.5319	3.8105	0.3689	0.3921	0.7184	0.5842	1.2781	0.3934	3.37884	1.3e-18	1.9e-17	2.76686	9.63e-13	3.93e-12	NA	NA	NA
Pcab084379	scaffold_566	458553	468820	-	K15803 (-)-germacrene D synthase [EC:4.2.3.75] | (RefSeq) LOW QUALITY PROTEIN: bifunctional sesquiterpene synthase 1-like (A)	NA	up	up	ko00909: Sesquiterpenoid and triterpenoid biosynthesis	RecName: Full=Germacrene D synthase 1; AltName: Full=PatTpsB15 [Pogostemon cablin]	TPGD1_POGCB RecName: Full=Germacrene D synthase 1; EC=4.2.3.75; AltName: Full=PatTpsB15;	A0A8F8AJI5_9LAMI SubName: Full=Delta-cadinene synthase {ECO:0000313|EMBL:QXY08397.1}; EC=4.2.3.13 {ECO:0000313|EMBL:QXY08397.1};	--	GO:0005829,cytosol; GO:0052577,germacrene-D synthase activity; GO:0000287,magnesium ion binding; GO:0010334,sesquiterpene synthase activity; GO:0016102,diterpenoid biosynthetic process; GO:0045338,farnesyl diphosphate metabolic process; GO:0051762,sesquiterpene biosynthetic process; GO:0003674,molecular_function; GO:0003824,catalytic activity; GO:0010333,terpene synthase activity; GO:0016829,lyas…	PF03936.19:Terpene synthase family, metal binding domain	0.7462	1.3664	0.6776	0.1599	0.255	0.1258	0.1108	0	0.0995	2.54218	5.87e-05	0.000260969	3.97537	1.25e-05	2.9e-05	NA	NA	NA
Pcab102522	scaffold_1118	16615	20776	-	K15803 (-)-germacrene D synthase [EC:4.2.3.75] | (RefSeq) vetispiradiene synthase 2-like (A)	NA	up	up	ko00909: Sesquiterpenoid and triterpenoid biosynthesis	sester/di-terpenoid synthase, partial [Leucosceptrum canum]	TPGAS_POGCB RecName: Full=Germacrene A synthase; EC=4.2.3.23; AltName: Full=PatTpsCF2;	A0A6I9T0U5_SESIN SubName: Full=vetispiradiene synthase 3 {ECO:0000313|RefSeq:XP_011073749.1};	--	GO:0005829,cytosol; GO:0034005,germacrene-A synthase activity; GO:0000287,magnesium ion binding; GO:0010334,sesquiterpene synthase activity; GO:0016102,diterpenoid biosynthetic process; GO:0045338,farnesyl diphosphate metabolic process; GO:0051762,sesquiterpene biosynthetic process; GO:0003674,molecular_function; GO:0003824,catalytic activity; GO:0010333,terpene synthase activity; GO:0016829,lyas…	PF03936.19:Terpene synthase family, metal binding domain	3.5051	4.0329	3.3062	0.133	0.0707	0.0697	0	0	0	5.47083	5.37e-12	5.27e-11	8.06908	5.88e-11	2.15e-10	NA	NA	NA
Pcab102526	scaffold_1118	89425	92937	+	K15803 (-)-germacrene D synthase [EC:4.2.3.75] | (RefSeq) gamma-cadinene synthase (A)	NA	up	up	ko00909: Sesquiterpenoid and triterpenoid biosynthesis	RecName: Full=Gamma-curcumene synthase; AltName: Full=PatTpsA [Pogostemon cablin]	TPSCS_POGCB RecName: Full=Gamma-curcumene synthase; EC=4.2.3.94; AltName: Full=PatTpsA;	A0A482IC14_LEUCN SubName: Full=Cedrol synthase {ECO:0000313|EMBL:QBP05430.1};	--	GO:0005829,cytosol; GO:0102064,gamma-curcumene synthase activity; GO:0000287,magnesium ion binding; GO:0010334,sesquiterpene synthase activity; GO:0016102,diterpenoid biosynthetic process; GO:0045338,farnesyl diphosphate metabolic process; GO:0051762,sesquiterpene biosynthetic process; GO:0003674,molecular_function; GO:0003824,catalytic activity; GO:0016829,lyase activity; GO:0016835,carbon-oxyge…	PF01397.24:Terpene synthase, N-terminal domain	0.9747	1.2878	0.8446	0	0	0.098	0	0	0	5.17573	6.45e-06	3.34e-05	6.77545	2.29e-07	6.29e-07	NA	NA	NA
Pcab102531	scaffold_1118	138146	142609	+	K15803 (-)-germacrene D synthase [EC:4.2.3.75] | (RefSeq) gamma-cadinene synthase (A)	down	NA	down	ko00909: Sesquiterpenoid and triterpenoid biosynthesis	RecName: Full=Gamma-curcumene synthase; AltName: Full=PatTpsA [Pogostemon cablin]	TPSCS_POGCB RecName: Full=Gamma-curcumene synthase; EC=4.2.3.94; AltName: Full=PatTpsA;	A0A482IC14_LEUCN SubName: Full=Cedrol synthase {ECO:0000313|EMBL:QBP05430.1};	--	GO:0005829,cytosol; GO:0102064,gamma-curcumene synthase activity; GO:0000287,magnesium ion binding; GO:0010334,sesquiterpene synthase activity; GO:0016102,diterpenoid biosynthetic process; GO:0045338,farnesyl diphosphate metabolic process; GO:0051762,sesquiterpene biosynthetic process; GO:0003674,molecular_function; GO:0003824,catalytic activity; GO:0016829,lyase activity; GO:0016835,carbon-oxyge…	PF03936.19:Terpene synthase family, metal binding domain	0	0	0	2.3667	1.84	2.7044	0	0	0	-8.14639	2.75e-11	2.55e-10	NA	NA	NA	-8.15455	2.83e-11	1.23e-10
Pcab102536	scaffold_1118	198281	201047	+	K15803 (-)-germacrene D synthase [EC:4.2.3.75] | (RefSeq) gamma-cadinene synthase (A)	down	up	down	ko00909: Sesquiterpenoid and triterpenoid biosynthesis	RecName: Full=Gamma-curcumene synthase; AltName: Full=PatTpsA [Pogostemon cablin]	TPSCS_POGCB RecName: Full=Gamma-curcumene synthase; EC=4.2.3.94; AltName: Full=PatTpsA;	A0A482IC14_LEUCN SubName: Full=Cedrol synthase {ECO:0000313|EMBL:QBP05430.1};	--	GO:0005829,cytosol; GO:0102064,gamma-curcumene synthase activity; GO:0000287,magnesium ion binding; GO:0010334,sesquiterpene synthase activity; GO:0016102,diterpenoid biosynthetic process; GO:0045338,farnesyl diphosphate metabolic process; GO:0051762,sesquiterpene biosynthetic process; GO:0003674,molecular_function; GO:0003824,catalytic activity; GO:0016829,lyase activity; GO:0016835,carbon-oxyge…	PF03936.19:Terpene synthase family, metal binding domain	15.228	15.8035	17.6487	118.307	114.026	125.724	1.9813	2.477	1.1118	-2.70744	0	0	3.31558	3.47e-65	5.29e-64	-6.02096	8.1e-139	3.33e-137
Pcab106822	scaffold_776	300361	309392	+	K15803 (-)-germacrene D synthase [EC:4.2.3.75] | (RefSeq) bifunctional sesquiterpene synthase 1-like (A)	down	NA	FALSE	ko00909: Sesquiterpenoid and triterpenoid biosynthesis	delta-cadinene synthase [Leonurus sibiricus]	TPGD1_POGCB RecName: Full=Germacrene D synthase 1; EC=4.2.3.75; AltName: Full=PatTpsB15;	A0A8F8AJI5_9LAMI SubName: Full=Delta-cadinene synthase {ECO:0000313|EMBL:QXY08397.1}; EC=4.2.3.13 {ECO:0000313|EMBL:QXY08397.1};	--	GO:0005829,cytosol; GO:0052577,germacrene-D synthase activity; GO:0000287,magnesium ion binding; GO:0010334,sesquiterpene synthase activity; GO:0016102,diterpenoid biosynthetic process; GO:0045338,farnesyl diphosphate metabolic process; GO:0051762,sesquiterpene biosynthetic process; GO:0003674,molecular_function; GO:0003824,catalytic activity; GO:0010333,terpene synthase activity; GO:0016829,lyas…	PF03936.19:Terpene synthase family, metal binding domain	0.3347	0.4622	1.1625	0.6478	0.7291	0.5994	0.2112	0.176	0.2371	0.15258	0.774582	0.852134	NA	NA	NA	-1.68292	0.0117338	0.0207112
Pcab110577	scaffold_434_1_582640	98640	99302	+	K15803 (-)-germacrene D synthase [EC:4.2.3.75] | (RefSeq) (-)-germacrene D synthase-like (A)	down	NA	down	ko00909: Sesquiterpenoid and triterpenoid biosynthesis	hypothetical protein Pfo_019748 [Paulownia fortunei]	--	A0A6I9U8S0_SESIN SubName: Full=uncharacterized protein LOC105176273 {ECO:0000313|RefSeq:XP_011097319.1, ECO:0000313|RefSeq:XP_020554374.1};	--	--	--	0	0	0.1081	1.6267	2.1362	1.2043	0.1326	0.4421	0.7144	-5.27267	7.49e-05	0.000326361	NA	NA	NA	-1.94092	0.0075732	0.0138252
Pcab120389	scaffold_1134	471293	485003	-	K15803 (-)-germacrene D synthase [EC:4.2.3.75] | (RefSeq) beta-caryophyllene synthase-like (A)	up	FALSE	up	ko00909: Sesquiterpenoid and triterpenoid biosynthesis	germacrene-D synthase [Striga asiatica]	SELS_OCIBA RecName: Full=Selinene synthase; EC=4.2.3.198 {ECO:0000269|PubMed:15516500};	A0A5A7R9U1_STRAF SubName: Full=Germacrene-D synthase {ECO:0000313|EMBL:GER53347.1};	--	GO:0000287,magnesium ion binding; GO:0010333,terpene synthase activity; GO:0016102,diterpenoid biosynthetic process; GO:0003674,molecular_function; GO:0005488,binding; GO:0043167,ion binding; GO:0043169,cation binding; GO:0046872,metal ion binding; GO:0003824,catalytic activity; GO:0016829,lyase activity; GO:0016835,carbon-oxygen lyase activity; GO:0016838,carbon-oxygen lyase activity, acting on …	PF01397.24:Terpene synthase, N-terminal domain	5.1603	6.0961	8.4335	3.0408	3.5264	4.0588	15.1322	14.8472	13.7586	1.06094	0.00234988	0.00745637	-0.960391	0.000329392	0.000649787	2.02561	1.63e-12	7.69e-12
Pcab038540	scaffold_89	462054	469179	-	K15803 (-)-germacrene D synthase [EC:4.2.3.75] | (RefSeq) uncharacterized protein LOC105163620 (A)	up	down	NA	ko00909: Sesquiterpenoid and triterpenoid biosynthesis	RecName: Full=Gamma-curcumene synthase; AltName: Full=PatTpsA [Pogostemon cablin]	TPSCS_POGCB RecName: Full=Gamma-curcumene synthase; EC=4.2.3.94; AltName: Full=PatTpsA;	A0A482IC14_LEUCN SubName: Full=Cedrol synthase {ECO:0000313|EMBL:QBP05430.1};	Elongation factor-type GTP-binding protein	GO:0005829,cytosol; GO:0102064,gamma-curcumene synthase activity; GO:0000287,magnesium ion binding; GO:0010334,sesquiterpene synthase activity; GO:0016102,diterpenoid biosynthetic process; GO:0045338,farnesyl diphosphate metabolic process; GO:0051762,sesquiterpene biosynthetic process; GO:0003674,molecular_function; GO:0003824,catalytic activity; GO:0016829,lyase activity; GO:0016835,carbon-oxyge…	PF01397.24:Terpene synthase, N-terminal domain	0.7939	0	0.3063	0.2711	0.3843	1.0426	4.133	3.9666	4.1607	NA	NA	NA	-3.27943	9.12e-08	2.6e-07	2.8431	3.89e-08	1.34e-07
Pcab038542	scaffold_89	481009	484232	-	K15803 (-)-germacrene D synthase [EC:4.2.3.75] | (RefSeq) gamma-cadinene synthase (A)	up	down	NA	ko00909: Sesquiterpenoid and triterpenoid biosynthesis	RecName: Full=Gamma-curcumene synthase; AltName: Full=PatTpsA [Pogostemon cablin]	TPSCS_POGCB RecName: Full=Gamma-curcumene synthase; EC=4.2.3.94; AltName: Full=PatTpsA;	A0A482IC14_LEUCN SubName: Full=Cedrol synthase {ECO:0000313|EMBL:QBP05430.1};	--	GO:0005829,cytosol; GO:0102064,gamma-curcumene synthase activity; GO:0000287,magnesium ion binding; GO:0010334,sesquiterpene synthase activity; GO:0016102,diterpenoid biosynthetic process; GO:0045338,farnesyl diphosphate metabolic process; GO:0051762,sesquiterpene biosynthetic process; GO:0003674,molecular_function; GO:0003824,catalytic activity; GO:0016829,lyase activity; GO:0016835,carbon-oxyge…	PF01397.24:Terpene synthase, N-terminal domain	0	0	0	0.5929	0.3438	0.3957	7.918	6.8484	7.5788	NA	NA	NA	-9.20823	1.97e-14	8.82e-14	4.04231	1.13e-27	9.7e-27
Pcab050350	scaffold_602	314555	315258	-	K15803 (-)-germacrene D synthase [EC:4.2.3.75] | (RefSeq) (-)-germacrene D synthase-like (A)	FALSE	down	FALSE	ko00909: Sesquiterpenoid and triterpenoid biosynthesis	hypothetical protein Pfo_018284 [Paulownia fortunei]	--	A0A2G9G7B1_9LAMI SubName: Full=Uncharacterized protein {ECO:0000313|EMBL:PIN00830.1};	Mitochondrial import inner membrane translocase, subunit TIM44	--	--	1.4421	0.557	0.6849	2.3235	2.0405	1.4833	1.68	4.6674	2.0112	-0.949458	0.100688	0.185376	-1.44975	0.0161889	0.0252746	0.507721	0.29702	0.371155
Pcab065777	scaffold_860	38932	43194	-	K15803 (-)-germacrene D synthase [EC:4.2.3.75] | (RefSeq) LOW QUALITY PROTEIN: bifunctional sesquiterpene synthase 1-like (A)	up	down	NA	ko00909: Sesquiterpenoid and triterpenoid biosynthesis	RecName: Full=Germacrene D synthase 2; AltName: Full=PatTpsBF2 [Pogostemon cablin]	TPGD2_POGCB RecName: Full=Germacrene D synthase 2; EC=4.2.3.75; AltName: Full=PatTpsBF2;	A0A8F8AJI5_9LAMI SubName: Full=Delta-cadinene synthase {ECO:0000313|EMBL:QXY08397.1}; EC=4.2.3.13 {ECO:0000313|EMBL:QXY08397.1};	--	GO:0005829,cytosol; GO:0052577,germacrene-D synthase activity; GO:0000287,magnesium ion binding; GO:0010334,sesquiterpene synthase activity; GO:0016102,diterpenoid biosynthetic process; GO:0045338,farnesyl diphosphate metabolic process; GO:0051762,sesquiterpene biosynthetic process; GO:0003674,molecular_function; GO:0003824,catalytic activity; GO:0010333,terpene synthase activity; GO:0016829,lyas…	PF03936.19:Terpene synthase family, metal binding domain	0	0	0.0562	0	0.0529	0	5.5165	3.2185	2.4766	NA	NA	NA	-7.35988	2.59e-09	8.42e-09	7.63373	5.58e-10	2.23e-09
Pcab069629	scaffold_1095	252826	257540	+	K15803 (-)-germacrene D synthase [EC:4.2.3.75] | (RefSeq) LOW QUALITY PROTEIN: bifunctional sesquiterpene synthase 1-like (A)	up	down	NA	ko00909: Sesquiterpenoid and triterpenoid biosynthesis	delta-cadinene synthase [Leonurus sibiricus]	TPGD2_POGCB RecName: Full=Germacrene D synthase 2; EC=4.2.3.75; AltName: Full=PatTpsBF2;	A0A8F8AJI5_9LAMI SubName: Full=Delta-cadinene synthase {ECO:0000313|EMBL:QXY08397.1}; EC=4.2.3.13 {ECO:0000313|EMBL:QXY08397.1};	--	GO:0005829,cytosol; GO:0052577,germacrene-D synthase activity; GO:0000287,magnesium ion binding; GO:0010334,sesquiterpene synthase activity; GO:0016102,diterpenoid biosynthetic process; GO:0045338,farnesyl diphosphate metabolic process; GO:0051762,sesquiterpene biosynthetic process; GO:0003674,molecular_function; GO:0003824,catalytic activity; GO:0010333,terpene synthase activity; GO:0016829,lyas…	PF03936.19:Terpene synthase family, metal binding domain	0	0	0	0.0498	0.2645	0.1044	57.7858	55.9213	53.122	NA	NA	NA	-12.2244	4.49e-25	3.05e-24	8.64129	2.2e-62	3.84e-61
Pcab069634	scaffold_1095	298774	302238	+	K15803 (-)-germacrene D synthase [EC:4.2.3.75] | (RefSeq) LOW QUALITY PROTEIN: bifunctional sesquiterpene synthase 1-like (A)	up	down	NA	ko00909: Sesquiterpenoid and triterpenoid biosynthesis	RecName: Full=Germacrene D synthase 1; AltName: Full=PatTpsB15 [Pogostemon cablin]	TPGD1_POGCB RecName: Full=Germacrene D synthase 1; EC=4.2.3.75; AltName: Full=PatTpsB15;	A0A8F8AJI5_9LAMI SubName: Full=Delta-cadinene synthase {ECO:0000313|EMBL:QXY08397.1}; EC=4.2.3.13 {ECO:0000313|EMBL:QXY08397.1};	--	GO:0005829,cytosol; GO:0052577,germacrene-D synthase activity; GO:0000287,magnesium ion binding; GO:0010334,sesquiterpene synthase activity; GO:0016102,diterpenoid biosynthetic process; GO:0045338,farnesyl diphosphate metabolic process; GO:0051762,sesquiterpene biosynthetic process; GO:0003674,molecular_function; GO:0003824,catalytic activity; GO:0010333,terpene synthase activity; GO:0016829,lyas…	PF01397.24:Terpene synthase, N-terminal domain	0.6111	0.9204	2.2009	0.2783	0.2958	0.8755	5.013	5.4637	5.5397	NA	NA	NA	-1.9175	0.00705431	0.0116504	3.45714	6.44e-05	0.000158653
Pcab071566	scaffold_816	433599	437560	+	K15803 (-)-germacrene D synthase [EC:4.2.3.75] | (RefSeq) valencene synthase (A)	up	down	NA	ko00909: Sesquiterpenoid and triterpenoid biosynthesis	hypothetical protein Pfo_009801 [Paulownia fortunei]	KIRO_ACTDE RecName: Full=Kirola {ECO:0000303|PubMed:21309790}; AltName: Allergen=Act d 11 {ECO:0000303|PubMed:21309790};	A0A8M8UT68_SESIN SubName: Full=uncharacterized protein LOC105156326 {ECO:0000313|RefSeq:XP_020547190.1};	Phosphoglucomutase/phosphomannomutase	GO:0002253,activation of immune response; GO:0006952,defense response; GO:0002376,immune system process; GO:0002682,regulation of immune system process; GO:0002684,positive regulation of immune system process; GO:0006955,immune response; GO:0008150,biological_process; GO:0048518,positive regulation of biological process; GO:0048583,regulation of response to stimulus; GO:0048584,positive regulatio…	PF02879.19:Phosphoglucomutase/phosphomannomutase, alpha/beta/alpha domain II	0.0249	0.0499	0.0768	0.0226	0.0722	0.1425	1.663	1.6737	1.6622	NA	NA	NA	-4.85761	4.63e-13	1.93e-12	4.39377	1.58e-15	8.73e-15
Pcab135594	scaffold_3760	21970	25664	+	K15803 (-)-germacrene D synthase [EC:4.2.3.75] | (RefSeq) gamma-cadinene synthase (A)	NA	up	up	ko00909: Sesquiterpenoid and triterpenoid biosynthesis	cedrol synthase [Leucosceptrum canum]	TPSCS_POGCB RecName: Full=Gamma-curcumene synthase; EC=4.2.3.94; AltName: Full=PatTpsA;	A0A482IC14_LEUCN SubName: Full=Cedrol synthase {ECO:0000313|EMBL:QBP05430.1};	--	GO:0005829,cytosol; GO:0102064,gamma-curcumene synthase activity; GO:0000287,magnesium ion binding; GO:0010334,sesquiterpene synthase activity; GO:0016102,diterpenoid biosynthetic process; GO:0045338,farnesyl diphosphate metabolic process; GO:0051762,sesquiterpene biosynthetic process; GO:0003674,molecular_function; GO:0003824,catalytic activity; GO:0016829,lyase activity; GO:0016835,carbon-oxyge…	PF03936.19:Terpene synthase family, metal binding domain	1.9492	0.5106	2.093	0.0772	0.041	0	0.0535	0	0	5.41965	1.98e-08	1.4e-07	6.64041	2.51e-07	6.89e-07	NA	NA	NA
Pcab076356	scaffold_882	44316	49648	-	K15803 (-)-germacrene D synthase [EC:4.2.3.75] | (RefSeq) valencene synthase (A)	up	down	NA	ko00909: Sesquiterpenoid and triterpenoid biosynthesis	hypothetical protein Pfo_009801 [Paulownia fortunei]	KIRO_ACTDE RecName: Full=Kirola {ECO:0000303|PubMed:21309790}; AltName: Allergen=Act d 11 {ECO:0000303|PubMed:21309790};	A0A8M8UT68_SESIN SubName: Full=uncharacterized protein LOC105156326 {ECO:0000313|RefSeq:XP_020547190.1};	Phosphoglucomutase/phosphomannomutase	GO:0002253,activation of immune response; GO:0006952,defense response; GO:0002376,immune system process; GO:0002682,regulation of immune system process; GO:0002684,positive regulation of immune system process; GO:0006955,immune response; GO:0008150,biological_process; GO:0048518,positive regulation of biological process; GO:0048583,regulation of response to stimulus; GO:0048584,positive regulatio…	PF02878.19:Phosphoglucomutase/phosphomannomutase, alpha/beta/alpha domain I	0.0251	0	0	0.0229	0.0487	0.096	6.8826	6.3973	7.0625	NA	NA	NA	-9.3477	4.05e-15	1.88e-14	6.91899	4.97e-34	5.08e-33
Pcab084368	scaffold_566	325492	328619	-	K15803 (-)-germacrene D synthase [EC:4.2.3.75] | (RefSeq) LOW QUALITY PROTEIN: bifunctional sesquiterpene synthase 1-like (A)	up	down	NA	ko00909: Sesquiterpenoid and triterpenoid biosynthesis	RecName: Full=Germacrene D synthase 1; AltName: Full=PatTpsB15 [Pogostemon cablin]	TPGD1_POGCB RecName: Full=Germacrene D synthase 1; EC=4.2.3.75; AltName: Full=PatTpsB15;	A0A8F8AJI5_9LAMI SubName: Full=Delta-cadinene synthase {ECO:0000313|EMBL:QXY08397.1}; EC=4.2.3.13 {ECO:0000313|EMBL:QXY08397.1};	--	GO:0005829,cytosol; GO:0052577,germacrene-D synthase activity; GO:0000287,magnesium ion binding; GO:0010334,sesquiterpene synthase activity; GO:0016102,diterpenoid biosynthetic process; GO:0045338,farnesyl diphosphate metabolic process; GO:0051762,sesquiterpene biosynthetic process; GO:0003674,molecular_function; GO:0003824,catalytic activity; GO:0010333,terpene synthase activity; GO:0016829,lyas…	PF03936.19:Terpene synthase family, metal binding domain	0.2237	0.0899	0.1381	0	0.5631	0.3846	9.3736	9.5539	8.3148	NA	NA	NA	-5.71865	8.1e-31	6.47e-30	4.82947	2.07e-06	6.03e-06
Pcab093695	scaffold_708	107463	110402	-	K15803 (-)-germacrene D synthase [EC:4.2.3.75] | (RefSeq) LOW QUALITY PROTEIN: bifunctional sesquiterpene synthase 1-like (A)	up	down	NA	ko00909: Sesquiterpenoid and triterpenoid biosynthesis	RecName: Full=Germacrene D synthase 2; AltName: Full=PatTpsBF2 [Pogostemon cablin]	TPGD2_POGCB RecName: Full=Germacrene D synthase 2; EC=4.2.3.75; AltName: Full=PatTpsBF2;	A0A8F8AJI5_9LAMI SubName: Full=Delta-cadinene synthase {ECO:0000313|EMBL:QXY08397.1}; EC=4.2.3.13 {ECO:0000313|EMBL:QXY08397.1};	--	GO:0005829,cytosol; GO:0052577,germacrene-D synthase activity; GO:0000287,magnesium ion binding; GO:0010334,sesquiterpene synthase activity; GO:0016102,diterpenoid biosynthetic process; GO:0045338,farnesyl diphosphate metabolic process; GO:0051762,sesquiterpene biosynthetic process; GO:0003674,molecular_function; GO:0003824,catalytic activity; GO:0010333,terpene synthase activity; GO:0016829,lyas…	PF01397.24:Terpene synthase, N-terminal domain	0	0	0.0564	0.1995	0.2651	0.1046	8.2943	6.3946	7.3851	NA	NA	NA	-8.33964	4.07e-12	1.6e-11	5.25842	8.37e-27	7.03e-26
Pcab106948	scaffold_1874	214271	219049	+	K15803 (-)-germacrene D synthase [EC:4.2.3.75] | (RefSeq) valencene synthase (A)	up	down	NA	ko00909: Sesquiterpenoid and triterpenoid biosynthesis	hypothetical protein Pfo_009801 [Paulownia fortunei]	KIRO_ACTDE RecName: Full=Kirola {ECO:0000303|PubMed:21309790}; AltName: Allergen=Act d 11 {ECO:0000303|PubMed:21309790};	A0A8M8UT68_SESIN SubName: Full=uncharacterized protein LOC105156326 {ECO:0000313|RefSeq:XP_020547190.1};	Phosphoglucomutase/phosphomannomutase	GO:0002253,activation of immune response; GO:0006952,defense response; GO:0002376,immune system process; GO:0002682,regulation of immune system process; GO:0002684,positive regulation of immune system process; GO:0006955,immune response; GO:0008150,biological_process; GO:0048518,positive regulation of biological process; GO:0048583,regulation of response to stimulus; GO:0048584,positive regulatio…	PF02879.19:Phosphoglucomutase/phosphomannomutase, alpha/beta/alpha domain II	0	0	0.058	0.1027	0.0546	0.0269	7.653	6.2301	6.2321	NA	NA	NA	-8.26668	1.56e-15	7.39e-15	6.73494	7.53e-32	7.27e-31
Pcab120387	scaffold_1134	451884	456858	-	K15803 (-)-germacrene D synthase [EC:4.2.3.75] | (RefSeq) germacrene-D synthase-like (A)	up	down	FALSE	ko00909: Sesquiterpenoid and triterpenoid biosynthesis	hypothetical protein SASPL_124410 [Salvia splendens]	GCDS_ORIVU RecName: Full=(-)-germacrene D synthase {ECO:0000303|PubMed:20419468}; EC=4.2.3.75 {ECO:0000269|PubMed:20419468, ECO:0000269|Ref.2}; AltName: Full=Terpene synthase 3 {ECO:0000303|PubMed:20419468}; Short=OvTPS3 {ECO:0000303|PubMed:20419468};	A0A8M8VCE0_SESIN SubName: Full=beta-caryophyllene synthase-like isoform X2 {ECO:0000313|RefSeq:XP_020553831.1};	--	GO:0000287,magnesium ion binding; GO:0042803,protein homodimerization activity; GO:0010333,terpene synthase activity; GO:0016102,diterpenoid biosynthetic process; GO:0003674,molecular_function; GO:0005488,binding; GO:0043167,ion binding; GO:0043169,cation binding; GO:0046872,metal ion binding; GO:0005515,protein binding; GO:0042802,identical protein binding; GO:0046983,protein dimerization activi…	PF03936.19:Terpene synthase family, metal binding domain	13.6541	14.1772	14.8149	14.6341	9.3521	16.6782	48.7663	43.283	45.7852	0.240824	0.201802	0.321451	-1.4985	2.41e-30	1.9e-29	1.74355	6.92e-29	6.16e-28
Pcab139245	scaffold_3751	5173	7209	-	K15803 (-)-germacrene D synthase [EC:4.2.3.75] | (RefSeq) bifunctional sesquiterpene synthase 1-like (A)	up	down	NA	ko00909: Sesquiterpenoid and triterpenoid biosynthesis	RecName: Full=Germacrene D synthase 2; AltName: Full=PatTpsBF2 [Pogostemon cablin]	TPGD2_POGCB RecName: Full=Germacrene D synthase 2; EC=4.2.3.75; AltName: Full=PatTpsBF2;	A0A8F8AJI5_9LAMI SubName: Full=Delta-cadinene synthase {ECO:0000313|EMBL:QXY08397.1}; EC=4.2.3.13 {ECO:0000313|EMBL:QXY08397.1};	--	GO:0005829,cytosol; GO:0052577,germacrene-D synthase activity; GO:0000287,magnesium ion binding; GO:0010334,sesquiterpene synthase activity; GO:0016102,diterpenoid biosynthetic process; GO:0045338,farnesyl diphosphate metabolic process; GO:0051762,sesquiterpene biosynthetic process; GO:0003674,molecular_function; GO:0003824,catalytic activity; GO:0010333,terpene synthase activity; GO:0016829,lyas…	PF03936.19:Terpene synthase family, metal binding domain	0	0	0	0.9899	0.1913	0.8494	5.6119	4.4694	6.3824	NA	NA	NA	-8.02892	8.14e-11	2.94e-10	2.99368	1.31e-10	5.46e-10
novel.8049	scaffold_233	696311	697601	.	K15803 (-)-germacrene D synthase [EC:4.2.3.75] | (RefSeq) LOW QUALITY PROTEIN: bifunctional sesquiterpene synthase 1-like (A)	up	down	NA	ko00909: Sesquiterpenoid and triterpenoid biosynthesis	RecName: Full=Germacrene D synthase 1; AltName: Full=PatTpsB15 [Pogostemon cablin]	TPGD1_POGCB RecName: Full=Germacrene D synthase 1; EC=4.2.3.75; AltName: Full=PatTpsB15;	A0A8F8AJI5_9LAMI SubName: Full=Delta-cadinene synthase {ECO:0000313|EMBL:QXY08397.1}; EC=4.2.3.13 {ECO:0000313|EMBL:QXY08397.1};	--	GO:0005829,cytosol; GO:0052577,germacrene-D synthase activity; GO:0000287,magnesium ion binding; GO:0010334,sesquiterpene synthase activity; GO:0016102,diterpenoid biosynthetic process; GO:0045338,farnesyl diphosphate metabolic process; GO:0051762,sesquiterpene biosynthetic process; GO:0003674,molecular_function; GO:0003824,catalytic activity; GO:0010333,terpene synthase activity; GO:0016829,lyas…	PF01397.24:Terpene synthase, N-terminal domain	0.054	0.0542	0	0.0983	0	0.0515	7.8318	7.6627	7.3376	NA	NA	NA	-7.51581	6.55e-13	2.7e-12	7.2066	5.82e-17	3.43e-16
Pcab141821	scaffold_8850	728	2174	+	K15803 (-)-germacrene D synthase [EC:4.2.3.75] | (RefSeq) LOW QUALITY PROTEIN: bifunctional sesquiterpene synthase 1-like (A)	NA	up	up	ko00909: Sesquiterpenoid and triterpenoid biosynthesis	RecName: Full=Germacrene D synthase 1; AltName: Full=PatTpsB15 [Pogostemon cablin]	TPGD1_POGCB RecName: Full=Germacrene D synthase 1; EC=4.2.3.75; AltName: Full=PatTpsB15;	A0A8F8AJI5_9LAMI SubName: Full=Delta-cadinene synthase {ECO:0000313|EMBL:QXY08397.1}; EC=4.2.3.13 {ECO:0000313|EMBL:QXY08397.1};	--	GO:0005829,cytosol; GO:0052577,germacrene-D synthase activity; GO:0000287,magnesium ion binding; GO:0010334,sesquiterpene synthase activity; GO:0016102,diterpenoid biosynthetic process; GO:0045338,farnesyl diphosphate metabolic process; GO:0051762,sesquiterpene biosynthetic process; GO:0003674,molecular_function; GO:0003824,catalytic activity; GO:0010333,terpene synthase activity; GO:0016829,lyas…	PF03936.19:Terpene synthase family, metal binding domain	6.1587	4.5622	5.1946	1.2872	0.7819	0.9643	0.2548	0.3186	0.2288	2.55961	1.06e-10	9.38e-10	4.49627	3.13e-12	1.24e-11	NA	NA	NA
farnesyl-PP	geranyl-PP	EC:2.5.1.1 2.5.1.10 farnesyl diphosphate synthase
Pcab001616	scaffold_23	405529	409305	+	K00787 farnesyl diphosphate synthase [EC:2.5.1.1 2.5.1.10] | (RefSeq) farnesyl pyrophosphate synthase 1 (A)	down	up	FALSE	ko00900: Terpenoid backbone biosynthesis; ko01100: Metabolic pathways; ko01110: Biosynthesis of secondary metabolites	farnesyl pyrophosphate synthase [Pogostemon cablin]	FPPS1_LUPAL RecName: Full=Farnesyl pyrophosphate synthase 1; Short=FPP synthase 1; Short=FPS 1; EC=2.5.1.10; AltName: Full=(2E,6E)-farnesyl diphosphate synthase 1; AltName: Full=Dimethylallyltranstransferase 1; EC=2.5.1.1; AltName: Full=Farnesyl diphosphate synthase 1; AltName: Full=Geranyltranstransferase 1;	A0A6C0X2B7_POGCB SubName: Full=Farnesyl pyrophosphate synthase {ECO:0000313|EMBL:QIC51177.1};	Polyprenyl synthetase	GO:0005737,cytoplasm; GO:0004161,dimethylallyltranstransferase activity; GO:0004337,geranyltranstransferase activity; GO:0046872,metal ion binding; GO:0006695,cholesterol biosynthetic process; GO:0045337,farnesyl diphosphate biosynthetic process; GO:0033384,geranyl diphosphate biosynthetic process; GO:0003674,molecular_function; GO:0003824,catalytic activity; GO:0004659,prenyltransferase activity…	PF00348.20:Polyprenyl synthetase	62.7288	68.7795	64.1477	50.9529	55.599	63.2606	24.8812	21.9671	22.4282	0.377146	9.95e-06	5.01e-05	1.69348	4.58e-61	6.56e-60	-1.31208	2.17e-31	2.07e-30
Pcab038397	scaffold_291	255392	259924	-	K00787 farnesyl diphosphate synthase [EC:2.5.1.1 2.5.1.10] | (RefSeq) farnesyl pyrophosphate synthase 1 (A)	down	up	up	ko00900: Terpenoid backbone biosynthesis; ko01100: Metabolic pathways; ko01110: Biosynthesis of secondary metabolites	farnesyl pyrophosphate synthase [Pogostemon cablin]	FPS_PANGI RecName: Full=Farnesyl pyrophosphate synthase {ECO:0000303|PubMed:29509695, ECO:0000303|Ref.1}; Short=FPP synthase {ECO:0000303|Ref.1}; Short=PgFPS {ECO:0000303|PubMed:29509695, ECO:0000303|Ref.1}; EC=2.5.1.10 {ECO:0000250|UniProtKB:P14324}; AltName: Full=(2E,6E)-farnesyl diphosphate synthase {ECO:0000305}; AltName: Full=Dimethylallyltranstransferase {ECO:0000305}; EC=2.5.1.1 {ECO:00002…	A0A6C0X2B7_POGCB SubName: Full=Farnesyl pyrophosphate synthase {ECO:0000313|EMBL:QIC51177.1};	Polyprenyl synthetase	GO:0005737,cytoplasm; GO:0004161,dimethylallyltranstransferase activity; GO:0004337,geranyltranstransferase activity; GO:0046872,metal ion binding; GO:0016117,carotenoid biosynthetic process; GO:0045337,farnesyl diphosphate biosynthetic process; GO:0033384,geranyl diphosphate biosynthetic process; GO:0015031,protein transport; GO:0009753,response to jasmonic acid; GO:0002238,response to molecule …	PF00348.20:Polyprenyl synthetase	57.9793	57.0601	54.6324	27.7966	30.3235	27.1573	4.8221	5.7015	5.2862	1.16475	5.81e-56	2.72e-54	3.61202	4.11e-213	2.46e-211	-2.44427	1.18e-75	2.52e-74
Pcab040954	scaffold_525	804172	808685	-	K00787 farnesyl diphosphate synthase [EC:2.5.1.1 2.5.1.10] | (RefSeq) farnesyl pyrophosphate synthase-like (A)	down	up	up	ko00900: Terpenoid backbone biosynthesis; ko01100: Metabolic pathways; ko01110: Biosynthesis of secondary metabolites	farnesyl pyrophosphate synthase [Pogostemon cablin]	FPS_PANGI RecName: Full=Farnesyl pyrophosphate synthase {ECO:0000303|PubMed:29509695, ECO:0000303|Ref.1}; Short=FPP synthase {ECO:0000303|Ref.1}; Short=PgFPS {ECO:0000303|PubMed:29509695, ECO:0000303|Ref.1}; EC=2.5.1.10 {ECO:0000250|UniProtKB:P14324}; AltName: Full=(2E,6E)-farnesyl diphosphate synthase {ECO:0000305}; AltName: Full=Dimethylallyltranstransferase {ECO:0000305}; EC=2.5.1.1 {ECO:00002…	A0A6C0X2B7_POGCB SubName: Full=Farnesyl pyrophosphate synthase {ECO:0000313|EMBL:QIC51177.1};	Polyprenyl synthetase	GO:0005737,cytoplasm; GO:0004161,dimethylallyltranstransferase activity; GO:0004337,geranyltranstransferase activity; GO:0046872,metal ion binding; GO:0016117,carotenoid biosynthetic process; GO:0045337,farnesyl diphosphate biosynthetic process; GO:0033384,geranyl diphosphate biosynthetic process; GO:0015031,protein transport; GO:0009753,response to jasmonic acid; GO:0002238,response to molecule …	PF00348.20:Polyprenyl synthetase	75.1854	63.9325	63.651	28.8733	29.9422	31.3107	8.3293	7.3505	7.3808	1.3429	1.91e-65	1.08e-63	3.33364	3.43e-199	1.88e-197	-1.9865	2.69e-65	4.94e-64
Pcab062120	scaffold_795	491373	492461	-	K13789 geranylgeranyl diphosphate synthase, type II [EC:2.5.1.1 2.5.1.10 2.5.1.29] | (RefSeq) geranylgeranyl pyrophosphate synthase, chloroplastic (A)	down	up	FALSE	ko00900: Terpenoid backbone biosynthesis; ko01100: Metabolic pathways; ko01110: Biosynthesis of secondary metabolites	geranylgeranyl diphosphate synthase 2 [Leucosceptrum canum]	GGPPS_CATRO RecName: Full=Geranylgeranyl pyrophosphate synthase, chloroplastic; Short=GGPP synthase; Short=GGPS; EC=2.5.1.-; AltName: Full=(2E,6E)-farnesyl diphosphate synthase; AltName: Full=Dimethylallyltranstransferase; EC=2.5.1.1; AltName: Full=Farnesyl diphosphate synthase; AltName: Full=Farnesyltranstransferase; EC=2.5.1.29; AltName: Full=Geranyltranstransferase; EC=2.5.1.10; Flags: Precurs…	A0A0U3B7B5_LEUCN SubName: Full=Geranylgeranyl diphosphate synthase 2 {ECO:0000313|EMBL:ALT16902.1};	Geranylgeranyl pyrophosphate synthase/Polyprenyl synthetase	GO:0009507,chloroplast; GO:0004161,dimethylallyltranstransferase activity; GO:0004311,farnesyltranstransferase activity; GO:0004337,geranyltranstransferase activity; GO:0046872,metal ion binding; GO:0016117,carotenoid biosynthetic process; GO:0045337,farnesyl diphosphate biosynthetic process; GO:0033384,geranyl diphosphate biosynthetic process; GO:0033386,geranylgeranyl diphosphate biosynthetic p…	PF00348.20:Polyprenyl synthetase	9.3397	9.6354	8.9524	9.6708	12.0146	10.8143	5.6514	4.3738	5.5816	-0.0458739	0.774452	0.852052	1.03677	3.76e-07	1.02e-06	-1.07913	5.59e-08	1.9e-07
Pcab064532	scaffold_802	438966	443882	-	K00787 farnesyl diphosphate synthase [EC:2.5.1.1 2.5.1.10] | (RefSeq) farnesyl pyrophosphate synthase-like (A)	down	up	FALSE	ko00900: Terpenoid backbone biosynthesis; ko01100: Metabolic pathways; ko01110: Biosynthesis of secondary metabolites	farnesyl pyrophosphate synthase [Pogostemon cablin]	FPPS1_LUPAL RecName: Full=Farnesyl pyrophosphate synthase 1; Short=FPP synthase 1; Short=FPS 1; EC=2.5.1.10; AltName: Full=(2E,6E)-farnesyl diphosphate synthase 1; AltName: Full=Dimethylallyltranstransferase 1; EC=2.5.1.1; AltName: Full=Farnesyl diphosphate synthase 1; AltName: Full=Geranyltranstransferase 1;	A0A6C0X2B7_POGCB SubName: Full=Farnesyl pyrophosphate synthase {ECO:0000313|EMBL:QIC51177.1};	Polyprenyl synthetase	GO:0005737,cytoplasm; GO:0004161,dimethylallyltranstransferase activity; GO:0004337,geranyltranstransferase activity; GO:0046872,metal ion binding; GO:0006695,cholesterol biosynthetic process; GO:0045337,farnesyl diphosphate biosynthetic process; GO:0033384,geranyl diphosphate biosynthetic process; GO:0003674,molecular_function; GO:0003824,catalytic activity; GO:0004659,prenyltransferase activity…	PF00348.20:Polyprenyl synthetase	33.0117	30.8074	33.1275	27.3068	29.187	28.2863	8.9314	8.6058	6.5358	0.365546	2.82e-06	1.54e-05	2.20528	1.47e-76	2.64e-75	-1.83577	1.15e-51	1.7e-50
Pcab118398	scaffold_2495	103883	104971	-	K13789 geranylgeranyl diphosphate synthase, type II [EC:2.5.1.1 2.5.1.10 2.5.1.29] | (RefSeq) geranylgeranyl pyrophosphate synthase, chloroplastic (A)	down	up	FALSE	ko00900: Terpenoid backbone biosynthesis; ko01100: Metabolic pathways; ko01110: Biosynthesis of secondary metabolites	geranylgeranyl diphosphate synthase 2 [Leucosceptrum canum]	GGPPS_CATRO RecName: Full=Geranylgeranyl pyrophosphate synthase, chloroplastic; Short=GGPP synthase; Short=GGPS; EC=2.5.1.-; AltName: Full=(2E,6E)-farnesyl diphosphate synthase; AltName: Full=Dimethylallyltranstransferase; EC=2.5.1.1; AltName: Full=Farnesyl diphosphate synthase; AltName: Full=Farnesyltranstransferase; EC=2.5.1.29; AltName: Full=Geranyltranstransferase; EC=2.5.1.10; Flags: Precurs…	A0A0U3B7B5_LEUCN SubName: Full=Geranylgeranyl diphosphate synthase 2 {ECO:0000313|EMBL:ALT16902.1};	Geranylgeranyl pyrophosphate synthase/Polyprenyl synthetase	GO:0009507,chloroplast; GO:0004161,dimethylallyltranstransferase activity; GO:0004311,farnesyltranstransferase activity; GO:0004337,geranyltranstransferase activity; GO:0046872,metal ion binding; GO:0016117,carotenoid biosynthetic process; GO:0045337,farnesyl diphosphate biosynthetic process; GO:0033384,geranyl diphosphate biosynthetic process; GO:0033386,geranylgeranyl diphosphate biosynthetic p…	PF00348.20:Polyprenyl synthetase	26.6118	22.9966	23.5659	18.8173	21.9236	18.0849	3.956	7.4018	5.6541	0.487347	3.53e-05	0.000162938	2.28592	1.39e-37	1.31e-36	-1.7958	1.77e-21	1.24e-20
Pcab015277	scaffold_62	2413821	2414909	-	K13789 geranylgeranyl diphosphate synthase, type II [EC:2.5.1.1 2.5.1.10 2.5.1.29] | (RefSeq) geranylgeranyl pyrophosphate synthase 7, chloroplastic-like (A)	FALSE	down	NA	ko00900: Terpenoid backbone biosynthesis; ko01100: Metabolic pathways; ko01110: Biosynthesis of secondary metabolites	hypothetical protein Pfo_018820 [Paulownia fortunei]	GGPPS_HEVBR RecName: Full=Geranylgeranyl pyrophosphate synthase, chloroplastic; Short=GGPP synthase; Short=GGPS; EC=2.5.1.-; AltName: Full=(2E,6E)-farnesyl diphosphate synthase; AltName: Full=Dimethylallyltranstransferase; EC=2.5.1.1; AltName: Full=Farnesyl diphosphate synthase; AltName: Full=Farnesyltranstransferase; EC=2.5.1.29; AltName: Full=Geranyltranstransferase; EC=2.5.1.10; Flags: Precurs…	A0A022S0F9_ERYGU SubName: Full=Uncharacterized protein {ECO:0000313|EMBL:EYU45809.1};	Geranylgeranyl pyrophosphate synthase/Polyprenyl synthetase	GO:0009507,chloroplast; GO:0004161,dimethylallyltranstransferase activity; GO:0004311,farnesyltranstransferase activity; GO:0004337,geranyltranstransferase activity; GO:0046872,metal ion binding; GO:0016117,carotenoid biosynthetic process; GO:0045337,farnesyl diphosphate biosynthetic process; GO:0033384,geranyl diphosphate biosynthetic process; GO:0033386,geranylgeranyl diphosphate biosynthetic p…	PF00348.20:Polyprenyl synthetase	0.4478	0.7708	0.5924	0.8156	0.867	1.283	2.422	1.5477	1.4498	NA	NA	NA	-1.38149	0.00763667	0.0125481	0.846445	0.0604184	0.0916885
Pcab019516	scaffold_87	1671956	1673439	+	K13789 geranylgeranyl diphosphate synthase, type II [EC:2.5.1.1 2.5.1.10 2.5.1.29] | (RefSeq) geranylgeranyl pyrophosphate synthase 7, chloroplastic-like (A)	FALSE	down	NA	ko00900: Terpenoid backbone biosynthesis; ko01100: Metabolic pathways; ko01110: Biosynthesis of secondary metabolites	hypothetical protein Pfo_018820 [Paulownia fortunei]	GGPPS_HEVBR RecName: Full=Geranylgeranyl pyrophosphate synthase, chloroplastic; Short=GGPP synthase; Short=GGPS; EC=2.5.1.-; AltName: Full=(2E,6E)-farnesyl diphosphate synthase; AltName: Full=Dimethylallyltranstransferase; EC=2.5.1.1; AltName: Full=Farnesyl diphosphate synthase; AltName: Full=Farnesyltranstransferase; EC=2.5.1.29; AltName: Full=Geranyltranstransferase; EC=2.5.1.10; Flags: Precurs…	A0A022S0F9_ERYGU SubName: Full=Uncharacterized protein {ECO:0000313|EMBL:EYU45809.1};	Geranylgeranyl pyrophosphate synthase/Polyprenyl synthetase	GO:0009507,chloroplast; GO:0004161,dimethylallyltranstransferase activity; GO:0004311,farnesyltranstransferase activity; GO:0004337,geranyltranstransferase activity; GO:0046872,metal ion binding; GO:0016117,carotenoid biosynthetic process; GO:0045337,farnesyl diphosphate biosynthetic process; GO:0033384,geranyl diphosphate biosynthetic process; GO:0033386,geranylgeranyl diphosphate biosynthetic p…	PF00348.20:Polyprenyl synthetase	0.0505	0.2028	0.1558	0.7356	0.5376	0.3375	0.7645	0.7965	1.2585	NA	NA	NA	-2.59896	0.000816724	0.00153536	0.790216	0.15093	0.206422
Pcab031806	scaffold_37_284008_3486280	820696	821595	-	K13789 geranylgeranyl diphosphate synthase, type II [EC:2.5.1.1 2.5.1.10 2.5.1.29] | (RefSeq) heterodimeric geranylgeranyl pyrophosphate synthase small subunit, chloroplastic-like (A)	up	down	FALSE	ko00900: Terpenoid backbone biosynthesis; ko01100: Metabolic pathways; ko01110: Biosynthesis of secondary metabolites	putative geranyl diphosphate synthase small subunit type I [Leucosceptrum canum]	GGPP1_ARATH RecName: Full=Heterodimeric geranylgeranyl pyrophosphate synthase large subunit 1, chloroplastic; Short=GGPP synthase 1; Short=GGPS1; EC=2.5.1.-; AltName: Full=(2E,6E)-farnesyl diphosphate synthase 1; AltName: Full=Dimethylallyltranstransferase 1; EC=2.5.1.1; AltName: Full=Farnesyl diphosphate synthase 1; AltName: Full=Farnesyltranstransferase 1; EC=2.5.1.29; AltName: Full=Geranyltran…	A0A0U2ZUJ2_LEUCN SubName: Full=Putative geranyl diphosphate synthase small subunit type I {ECO:0000313|EMBL:ALT07955.1};	Geranylgeranyl pyrophosphate synthase/Polyprenyl synthetase	GO:0009507,chloroplast; GO:0005829,cytosol; GO:0009513,etioplast; GO:0009536,plastid; GO:0004161,dimethylallyltranstransferase activity; GO:0004311,farnesyltranstransferase activity; GO:0004337,geranyltranstransferase activity; GO:0046872,metal ion binding; GO:0004659,prenyltransferase activity; GO:0016117,carotenoid biosynthetic process; GO:0009793,embryo development ending in seed dormancy; GO:…	PF00348.20:Polyprenyl synthetase	2.2447	1.6322	1.4337	1.0574	0.8992	1.3307	12.8949	11.1546	8.508	0.86694	0.0571535	0.116821	-2.41685	5.72e-17	2.9e-16	3.28766	2.53e-26	2.09e-25
Pcab073784	scaffold_844	295987	297896	+	K13789 geranylgeranyl diphosphate synthase, type II [EC:2.5.1.1 2.5.1.10 2.5.1.29] | (RefSeq) heterodimeric geranylgeranyl pyrophosphate synthase small subunit, chloroplastic (A)	up	down	down	ko00900: Terpenoid backbone biosynthesis; ko01100: Metabolic pathways; ko01110: Biosynthesis of secondary metabolites	geranylgeranyl pyrophosphate synthase [Scutellaria barbata]	GGR_ARATH RecName: Full=Heterodimeric geranylgeranyl pyrophosphate synthase small subunit, chloroplastic; Flags: Precursor;	A0A6B7LZW7_9LAMI SubName: Full=Geranylgeranyl pyrophosphate synthase {ECO:0000313|EMBL:QEY10182.1};	Geranylgeranyl pyrophosphate synthase/Polyprenyl synthetase	GO:0009507,chloroplast; GO:0009535,chloroplast thylakoid membrane; GO:0042651,thylakoid membrane; GO:0046872,metal ion binding; GO:0004659,prenyltransferase activity; GO:0043693,monoterpene biosynthetic process; GO:0003674,molecular_function; GO:0005488,binding; GO:0043167,ion binding; GO:0043169,cation binding; GO:0003824,catalytic activity; GO:0016740,transferase activity; GO:0016765,transferas…	PF00348.20:Polyprenyl synthetase	7.2723	7.1286	6.6518	16.3994	17.8805	16.0412	52.8103	51.4829	50.8173	-1.08481	6.54e-14	7.33e-13	-2.6872	5.52e-112	1.5e-110	1.60669	4.58e-60	7.73e-59
Pcab081957	scaffold_1082	287535	288623	-	K13789 geranylgeranyl diphosphate synthase, type II [EC:2.5.1.1 2.5.1.10 2.5.1.29] | (RefSeq) geranylgeranyl pyrophosphate synthase, chloroplastic (A)	up	down	FALSE	ko00900: Terpenoid backbone biosynthesis; ko01100: Metabolic pathways; ko01110: Biosynthesis of secondary metabolites	geranylgeranyl diphosphate synthase 2 [Leucosceptrum canum]	GGPPS_CATRO RecName: Full=Geranylgeranyl pyrophosphate synthase, chloroplastic; Short=GGPP synthase; Short=GGPS; EC=2.5.1.-; AltName: Full=(2E,6E)-farnesyl diphosphate synthase; AltName: Full=Dimethylallyltranstransferase; EC=2.5.1.1; AltName: Full=Farnesyl diphosphate synthase; AltName: Full=Farnesyltranstransferase; EC=2.5.1.29; AltName: Full=Geranyltranstransferase; EC=2.5.1.10; Flags: Precurs…	A0A0U3B7B5_LEUCN SubName: Full=Geranylgeranyl diphosphate synthase 2 {ECO:0000313|EMBL:ALT16902.1};	Geranylgeranyl pyrophosphate synthase/Polyprenyl synthetase	GO:0009507,chloroplast; GO:0004161,dimethylallyltranstransferase activity; GO:0004311,farnesyltranstransferase activity; GO:0004337,geranyltranstransferase activity; GO:0046872,metal ion binding; GO:0016117,carotenoid biosynthetic process; GO:0045337,farnesyl diphosphate biosynthetic process; GO:0033384,geranyl diphosphate biosynthetic process; GO:0033386,geranylgeranyl diphosphate biosynthetic p…	PF00348.20:Polyprenyl synthetase	5.1816	5.717	4.8053	5.884	6.4408	6.5374	15.824	17.3607	15.1501	-0.0913744	0.656336	0.762369	-1.42894	7.43e-16	3.58e-15	1.34199	2.86e-16	1.63e-15
Pcab090269	scaffold_460	490058	491417	+	K13789 geranylgeranyl diphosphate synthase, type II [EC:2.5.1.1 2.5.1.10 2.5.1.29] | (RefSeq) geranylgeranyl pyrophosphate synthase, chloroplastic-like (A)	FALSE	down	down	ko00900: Terpenoid backbone biosynthesis; ko01100: Metabolic pathways; ko01110: Biosynthesis of secondary metabolites	geranylgeranyl diphosphate synthase 1 [Leucosceptrum canum]	GGPPS_CAPAN RecName: Full=Geranylgeranyl pyrophosphate synthase, chloroplastic {ECO:0000303|PubMed:1303794}; Short=GGPP synthase {ECO:0000303|PubMed:1303794}; Short=GGPS {ECO:0000303|PubMed:1303794}; EC=2.5.1.- {ECO:0000269|PubMed:1303794}; AltName: Full=(2E,6E)-farnesyl diphosphate synthase {ECO:0000303|PubMed:1303794}; AltName: Full=Dimethylallyltranstransferase {ECO:0000303|PubMed:1303794}; EC…	A0A0U2Q967_LEUCN SubName: Full=Geranylgeranyl diphosphate synthase 1 {ECO:0000313|EMBL:ALT16901.1};	Geranylgeranyl pyrophosphate synthase/Polyprenyl synthetase	GO:0009507,chloroplast; GO:0009536,plastid; GO:0004161,dimethylallyltranstransferase activity; GO:0004311,farnesyltranstransferase activity; GO:0004337,geranyltranstransferase activity; GO:0046872,metal ion binding; GO:0016117,carotenoid biosynthetic process; GO:0045337,farnesyl diphosphate biosynthetic process; GO:0033384,geranyl diphosphate biosynthetic process; GO:0033386,geranylgeranyl diphos…	PF00348.20:Polyprenyl synthetase	1.893	1.1405	1.1688	3.2017	3.3512	3.5127	3.7543	3.8118	3.3096	-1.08534	0.000546218	0.00200234	-1.17552	0.000365762	0.000717822	0.0946737	0.706398	0.762896
Pcab092394	scaffold_639	276958	278324	+	K13789 geranylgeranyl diphosphate synthase, type II [EC:2.5.1.1 2.5.1.10 2.5.1.29] | (RefSeq) geranylgeranyl pyrophosphate synthase, chloroplastic-like (A)	up	down	down	ko00900: Terpenoid backbone biosynthesis; ko01100: Metabolic pathways; ko01110: Biosynthesis of secondary metabolites	geranylgeranyl diphosphate synthase 1 [Leucosceptrum canum]	GGPPS_CAPAN RecName: Full=Geranylgeranyl pyrophosphate synthase, chloroplastic {ECO:0000303|PubMed:1303794}; Short=GGPP synthase {ECO:0000303|PubMed:1303794}; Short=GGPS {ECO:0000303|PubMed:1303794}; EC=2.5.1.- {ECO:0000269|PubMed:1303794}; AltName: Full=(2E,6E)-farnesyl diphosphate synthase {ECO:0000303|PubMed:1303794}; AltName: Full=Dimethylallyltranstransferase {ECO:0000303|PubMed:1303794}; EC…	A0A0U2Q967_LEUCN SubName: Full=Geranylgeranyl diphosphate synthase 1 {ECO:0000313|EMBL:ALT16901.1};	Geranylgeranyl pyrophosphate synthase/Polyprenyl synthetase	GO:0009507,chloroplast; GO:0009536,plastid; GO:0004161,dimethylallyltranstransferase activity; GO:0004311,farnesyltranstransferase activity; GO:0004337,geranyltranstransferase activity; GO:0046872,metal ion binding; GO:0016117,carotenoid biosynthetic process; GO:0045337,farnesyl diphosphate biosynthetic process; GO:0033384,geranyl diphosphate biosynthetic process; GO:0033386,geranylgeranyl diphos…	PF00348.20:Polyprenyl synthetase	0.5936	0.4335	0.5553	1.376	1.4105	1.2884	5.2439	6.0734	5.8089	-1.19304	0.013264	0.0339798	-3.24481	7.67e-19	4.2e-18	2.0562	7.1e-14	3.61e-13
Pcab114723	scaffold_1213_187512_498454	11968	12870	-	K13789 geranylgeranyl diphosphate synthase, type II [EC:2.5.1.1 2.5.1.10 2.5.1.29] | (RefSeq) heterodimeric geranylgeranyl pyrophosphate synthase small subunit, chloroplastic-like (A)	up	down	FALSE	ko00900: Terpenoid backbone biosynthesis; ko01100: Metabolic pathways; ko01110: Biosynthesis of secondary metabolites	putative geranyl diphosphate synthase small subunit type I [Leucosceptrum canum]	GGPP1_ARATH RecName: Full=Heterodimeric geranylgeranyl pyrophosphate synthase large subunit 1, chloroplastic; Short=GGPP synthase 1; Short=GGPS1; EC=2.5.1.-; AltName: Full=(2E,6E)-farnesyl diphosphate synthase 1; AltName: Full=Dimethylallyltranstransferase 1; EC=2.5.1.1; AltName: Full=Farnesyl diphosphate synthase 1; AltName: Full=Farnesyltranstransferase 1; EC=2.5.1.29; AltName: Full=Geranyltran…	A0A0U2ZUJ2_LEUCN SubName: Full=Putative geranyl diphosphate synthase small subunit type I {ECO:0000313|EMBL:ALT07955.1};	Geranylgeranyl pyrophosphate synthase/Polyprenyl synthetase	GO:0009507,chloroplast; GO:0005829,cytosol; GO:0009513,etioplast; GO:0009536,plastid; GO:0004161,dimethylallyltranstransferase activity; GO:0004311,farnesyltranstransferase activity; GO:0004337,geranyltranstransferase activity; GO:0046872,metal ion binding; GO:0004659,prenyltransferase activity; GO:0016117,carotenoid biosynthetic process; GO:0009793,embryo development ending in seed dormancy; GO:…	PF00348.20:Polyprenyl synthetase	0.8486	1.2395	0.9526	0.4918	0.1494	1.1789	11.0022	12.0913	13.5501	0.916122	0.165501	0.275349	-3.3999	2.08e-27	1.51e-26	4.32039	1.81e-13	9.01e-13
Pcab126128	scaffold_2905	88363	89203	-	K13789 geranylgeranyl diphosphate synthase, type II [EC:2.5.1.1 2.5.1.10 2.5.1.29] | (RefSeq) geranylgeranyl pyrophosphate synthase 7, chloroplastic-like (A)	up	down	NA	ko00900: Terpenoid backbone biosynthesis; ko01100: Metabolic pathways; ko01110: Biosynthesis of secondary metabolites	hypothetical protein Pfo_018820 [Paulownia fortunei]	GGPPS_HEVBR RecName: Full=Geranylgeranyl pyrophosphate synthase, chloroplastic; Short=GGPP synthase; Short=GGPS; EC=2.5.1.-; AltName: Full=(2E,6E)-farnesyl diphosphate synthase; AltName: Full=Dimethylallyltranstransferase; EC=2.5.1.1; AltName: Full=Farnesyl diphosphate synthase; AltName: Full=Farnesyltranstransferase; EC=2.5.1.29; AltName: Full=Geranyltranstransferase; EC=2.5.1.10; Flags: Precurs…	A0A022S0F9_ERYGU SubName: Full=Uncharacterized protein {ECO:0000313|EMBL:EYU45809.1};	Geranylgeranyl pyrophosphate synthase/Polyprenyl synthetase	GO:0009507,chloroplast; GO:0004161,dimethylallyltranstransferase activity; GO:0004311,farnesyltranstransferase activity; GO:0004337,geranyltranstransferase activity; GO:0046872,metal ion binding; GO:0016117,carotenoid biosynthetic process; GO:0045337,farnesyl diphosphate biosynthetic process; GO:0033384,geranyl diphosphate biosynthetic process; GO:0033386,geranylgeranyl diphosphate biosynthetic p…	PF00348.20:Polyprenyl synthetase	0.81	0.5423	0.7409	1.0656	3.1369	0.7737	3.2942	4.6391	2.7537	NA	NA	NA	-2.16088	1.35e-05	3.12e-05	1.08676	0.0202003	0.0340473
Pcab133300	scaffold_3655	41104	42829	+	K13789 geranylgeranyl diphosphate synthase, type II [EC:2.5.1.1 2.5.1.10 2.5.1.29] | (RefSeq) heterodimeric geranylgeranyl pyrophosphate synthase small subunit, chloroplastic-like (A)	up	down	down	ko00900: Terpenoid backbone biosynthesis; ko01100: Metabolic pathways; ko01110: Biosynthesis of secondary metabolites	geranylgeranyl pyrophosphate synthase [Scutellaria barbata]	GGR_ARATH RecName: Full=Heterodimeric geranylgeranyl pyrophosphate synthase small subunit, chloroplastic; Flags: Precursor;	A0A6B7LZW7_9LAMI SubName: Full=Geranylgeranyl pyrophosphate synthase {ECO:0000313|EMBL:QEY10182.1};	Geranylgeranyl pyrophosphate synthase/Polyprenyl synthetase	GO:0009507,chloroplast; GO:0009535,chloroplast thylakoid membrane; GO:0042651,thylakoid membrane; GO:0046872,metal ion binding; GO:0004659,prenyltransferase activity; GO:0043693,monoterpene biosynthetic process; GO:0003674,molecular_function; GO:0005488,binding; GO:0043167,ion binding; GO:0043169,cation binding; GO:0003824,catalytic activity; GO:0016740,transferase activity; GO:0016765,transferas…	PF00348.20:Polyprenyl synthetase	7.2771	7.2252	8.1613	15.265	21.4519	15.6186	61.6059	66.4836	63.4671	-1.03632	1.46e-08	1.05e-07	-2.88771	4.83e-105	1.22e-103	1.85588	8.58e-50	1.23e-48
novel.12956	scaffold_413_1_723979	582500	584899	-	K13789 geranylgeranyl diphosphate synthase, type II [EC:2.5.1.1 2.5.1.10 2.5.1.29] | (RefSeq) geranylgeranyl pyrophosphate synthase, chloroplastic (A)	up	down	down	ko00900: Terpenoid backbone biosynthesis; ko01100: Metabolic pathways; ko01110: Biosynthesis of secondary metabolites	putative receptor-like protein kinase At3g47110 [Salvia splendens]	GGPPS_CATRO RecName: Full=Geranylgeranyl pyrophosphate synthase, chloroplastic; Short=GGPP synthase; Short=GGPS; EC=2.5.1.-; AltName: Full=(2E,6E)-farnesyl diphosphate synthase; AltName: Full=Dimethylallyltranstransferase; EC=2.5.1.1; AltName: Full=Farnesyl diphosphate synthase; AltName: Full=Farnesyltranstransferase; EC=2.5.1.29; AltName: Full=Geranyltranstransferase; EC=2.5.1.10; Flags: Precurs…	A0A0U3B7B5_LEUCN SubName: Full=Geranylgeranyl diphosphate synthase 2 {ECO:0000313|EMBL:ALT16902.1};	Geranylgeranyl pyrophosphate synthase/Polyprenyl synthetase	GO:0009507,chloroplast; GO:0004161,dimethylallyltranstransferase activity; GO:0004311,farnesyltranstransferase activity; GO:0004337,geranyltranstransferase activity; GO:0046872,metal ion binding; GO:0016117,carotenoid biosynthetic process; GO:0045337,farnesyl diphosphate biosynthetic process; GO:0033384,geranyl diphosphate biosynthetic process; GO:0033386,geranylgeranyl diphosphate biosynthetic p…	PF08263.15:Leucine rich repeat N-terminal domain	0.4381	0.5279	0.3156	2.8729	1.9088	3.7661	10.1191	8.6643	8.738	-2.56159	4.71e-10	3.93e-09	-4.22671	3.82e-38	3.64e-37	1.66881	2.75e-15	1.5e-14
isopentenyl-PP	dimethylallyl-PP	EC:5.3.3.2 isopentenyl-diphosphate Delta-isomerase
Pcab004196	scaffold_144	3297857	3300401	-	K01823 isopentenyl-diphosphate Delta-isomerase [EC:5.3.3.2] | (RefSeq) isopentenyl-diphosphate Delta-isomerase I (A)	down	up	up	ko00900: Terpenoid backbone biosynthesis; ko01100: Metabolic pathways; ko01110: Biosynthesis of secondary metabolites	isopentenyl pyrophosphate isomerase, partial [Pogostemon cablin]	IDI2_CAMAC RecName: Full=Isopentenyl-diphosphate Delta-isomerase II; EC=5.3.3.2; AltName: Full=Isopentenyl pyrophosphate isomerase II; Short=IPP isomerase II;	A0A2D0UJT0_POGCB RecName: Full=Isopentenyl-diphosphate Delta-isomerase {ECO:0000256|ARBA:ARBA00012057}; EC=5.3.3.2 {ECO:0000256|ARBA:ARBA00012057}; Flags: Fragment;	Isopentenyl pyrophosphate:dimethylallyl pyrophosphate isomerase	GO:0004452,isopentenyl-diphosphate delta-isomerase activity; GO:0046872,metal ion binding; GO:0015995,chlorophyll biosynthetic process; GO:0050992,dimethylallyl diphosphate biosynthetic process; GO:0008299,isoprenoid biosynthetic process; GO:0015979,photosynthesis; GO:0003674,molecular_function; GO:0003824,catalytic activity; GO:0016853,isomerase activity; GO:0016860,intramolecular oxidoreductase…	PF00293.31:NUDIX domain	42.501	39.2493	39.2537	19.0598	18.8725	16.9646	3.9964	4.1635	4.5413	1.31202	9.12e-48	3.59e-46	3.4436	4.06e-140	1.43e-138	-2.12763	1.03e-40	1.22e-39
Pcab011653	scaffold_93	2214328	2216911	-	K01823 isopentenyl-diphosphate Delta-isomerase [EC:5.3.3.2] | (RefSeq) isopentenyl-diphosphate Delta-isomerase I (A)	down	up	up	ko00900: Terpenoid backbone biosynthesis; ko01100: Metabolic pathways; ko01110: Biosynthesis of secondary metabolites	isopentenyl pyrophosphate isomerase, partial [Pogostemon cablin]	IDI2_CAMAC RecName: Full=Isopentenyl-diphosphate Delta-isomerase II; EC=5.3.3.2; AltName: Full=Isopentenyl pyrophosphate isomerase II; Short=IPP isomerase II;	A0A2D0UJT0_POGCB RecName: Full=Isopentenyl-diphosphate Delta-isomerase {ECO:0000256|ARBA:ARBA00012057}; EC=5.3.3.2 {ECO:0000256|ARBA:ARBA00012057}; Flags: Fragment;	Isopentenyl pyrophosphate:dimethylallyl pyrophosphate isomerase	GO:0004452,isopentenyl-diphosphate delta-isomerase activity; GO:0046872,metal ion binding; GO:0015995,chlorophyll biosynthetic process; GO:0050992,dimethylallyl diphosphate biosynthetic process; GO:0008299,isoprenoid biosynthetic process; GO:0015979,photosynthesis; GO:0003674,molecular_function; GO:0003824,catalytic activity; GO:0016853,isomerase activity; GO:0016860,intramolecular oxidoreductase…	PF00293.31:NUDIX domain	30.5397	30.2701	25.7396	9.7051	10.0305	10.7437	3.3001	2.5948	3.0749	1.67902	2.87e-50	1.19e-48	3.47091	4.38e-99	1.04e-97	-1.7867	7.72e-20	5.1e-19
Pcab035389	scaffold_193	107080	109435	+	K01823 isopentenyl-diphosphate Delta-isomerase [EC:5.3.3.2] | (RefSeq) isopentenyl-diphosphate Delta-isomerase I (A)	down	up	up	ko00900: Terpenoid backbone biosynthesis; ko01100: Metabolic pathways; ko01110: Biosynthesis of secondary metabolites	isopentenyl diphosphate isomerase, partial [Pogostemon cablin]	IDI1_CAMAC RecName: Full=Isopentenyl-diphosphate Delta-isomerase I; EC=5.3.3.2; AltName: Full=Isopentenyl pyrophosphate isomerase I; Short=IPP isomerase I;	A0A2D0UB28_POGCB RecName: Full=Isopentenyl-diphosphate Delta-isomerase {ECO:0000256|ARBA:ARBA00012057}; EC=5.3.3.2 {ECO:0000256|ARBA:ARBA00012057}; Flags: Fragment;	Isopentenyl pyrophosphate:dimethylallyl pyrophosphate isomerase	GO:0004452,isopentenyl-diphosphate delta-isomerase activity; GO:0046872,metal ion binding; GO:0015995,chlorophyll biosynthetic process; GO:0050992,dimethylallyl diphosphate biosynthetic process; GO:0008299,isoprenoid biosynthetic process; GO:0015979,photosynthesis; GO:0003674,molecular_function; GO:0003824,catalytic activity; GO:0016853,isomerase activity; GO:0016860,intramolecular oxidoreductase…	PF00293.31:NUDIX domain	78.075	73.5134	75.1393	24.9718	25.3778	24.3879	5.9978	4.2451	4.5731	1.7731	7.76e-167	1.7e-164	4.14027	0	0	-2.36109	1.84e-71	3.73e-70
Pcab069492	scaffold_903	101798	104092	+	K01823 isopentenyl-diphosphate Delta-isomerase [EC:5.3.3.2] | (RefSeq) isopentenyl-diphosphate Delta-isomerase I (A)	down	up	up	ko00900: Terpenoid backbone biosynthesis; ko01100: Metabolic pathways; ko01110: Biosynthesis of secondary metabolites	isopentenyl diphosphate isomerase, partial [Pogostemon cablin]	IDI2_CAMAC RecName: Full=Isopentenyl-diphosphate Delta-isomerase II; EC=5.3.3.2; AltName: Full=Isopentenyl pyrophosphate isomerase II; Short=IPP isomerase II;	A0A2D0UB28_POGCB RecName: Full=Isopentenyl-diphosphate Delta-isomerase {ECO:0000256|ARBA:ARBA00012057}; EC=5.3.3.2 {ECO:0000256|ARBA:ARBA00012057}; Flags: Fragment;	Isopentenyl pyrophosphate:dimethylallyl pyrophosphate isomerase	GO:0004452,isopentenyl-diphosphate delta-isomerase activity; GO:0046872,metal ion binding; GO:0015995,chlorophyll biosynthetic process; GO:0050992,dimethylallyl diphosphate biosynthetic process; GO:0008299,isoprenoid biosynthetic process; GO:0015979,photosynthesis; GO:0003674,molecular_function; GO:0003824,catalytic activity; GO:0016853,isomerase activity; GO:0016860,intramolecular oxidoreductase…	PF00293.31:NUDIX domain	122.552	125.631	121.447	48.0931	46.8936	46.9771	10.0395	9.1546	9.6388	1.55238	2.96e-196	8.95e-194	3.87587	0	0	-2.31897	4.7e-127	1.75e-125
Pcab076261	scaffold_513	315596	332196	-	--	up	FALSE	FALSE	--	hypothetical protein Pfo_010571 [Paulownia fortunei]	NUDT3_ARATH RecName: Full=Nudix hydrolase 3; Short=AtNUDT3; EC=3.6.1.-;	A0A2G9H4W0_9LAMI SubName: Full=Isopentenyl-diphosphate Delta-isomerase {ECO:0000313|EMBL:PIN12548.1}; EC=5.3.3.2 {ECO:0000313|EMBL:PIN12548.1};	--	GO:0005737,cytoplasm; GO:0005829,cytosol; GO:0005739,mitochondrion; GO:0000325,plant-type vacuole; GO:0008239,dipeptidyl-peptidase activity; GO:0046872,metal ion binding; GO:0016791,phosphatase activity; GO:0006508,proteolysis; GO:0003674,molecular_function; GO:0003824,catalytic activity; GO:0008233,peptidase activity; GO:0008238,exopeptidase activity; GO:0016787,hydrolase activity; GO:0140096,ca…	PF00293.31:NUDIX domain	3.2977	3.0923	2.8694	2.4511	3.0752	3.358	7.2527	6.6825	6.6218	0.233884	0.201244	0.320784	-0.955502	8.11e-10	2.73e-09	1.19383	5.82e-14	2.97e-13
Pcab086214	scaffold_1233	74955	76336	+	K01823 isopentenyl-diphosphate Delta-isomerase [EC:5.3.3.2] | (RefSeq) isopentenyl-diphosphate Delta-isomerase I (A)	FALSE	up	up	ko00900: Terpenoid backbone biosynthesis; ko01100: Metabolic pathways; ko01110: Biosynthesis of secondary metabolites	isopentenyl diphosphate isomerase, partial [Pogostemon cablin]	IDI1_CAMAC RecName: Full=Isopentenyl-diphosphate Delta-isomerase I; EC=5.3.3.2; AltName: Full=Isopentenyl pyrophosphate isomerase I; Short=IPP isomerase I;	A0A2D0UB28_POGCB RecName: Full=Isopentenyl-diphosphate Delta-isomerase {ECO:0000256|ARBA:ARBA00012057}; EC=5.3.3.2 {ECO:0000256|ARBA:ARBA00012057}; Flags: Fragment;	Isopentenyl pyrophosphate:dimethylallyl pyrophosphate isomerase	GO:0004452,isopentenyl-diphosphate delta-isomerase activity; GO:0046872,metal ion binding; GO:0015995,chlorophyll biosynthetic process; GO:0050992,dimethylallyl diphosphate biosynthetic process; GO:0008299,isoprenoid biosynthetic process; GO:0015979,photosynthesis; GO:0003674,molecular_function; GO:0003824,catalytic activity; GO:0016853,isomerase activity; GO:0016860,intramolecular oxidoreductase…	PF00293.31:NUDIX domain	58.4983	57.6038	56.6154	23.1371	17.3895	19.6283	14.398	14.6386	12.9275	1.69218	8.87e-59	4.38e-57	2.23455	5.08e-82	9.83e-81	-0.537531	0.000571388	0.00124131
Pcab098040	scaffold_1696	145872	148396	-	K01823 isopentenyl-diphosphate Delta-isomerase [EC:5.3.3.2] | (RefSeq) isopentenyl-diphosphate Delta-isomerase I (A)	down	up	FALSE	ko00900: Terpenoid backbone biosynthesis; ko01100: Metabolic pathways; ko01110: Biosynthesis of secondary metabolites	isopentenyl pyrophosphate isomerase [Pogostemon cablin]	IDI2_CAMAC RecName: Full=Isopentenyl-diphosphate Delta-isomerase II; EC=5.3.3.2; AltName: Full=Isopentenyl pyrophosphate isomerase II; Short=IPP isomerase II;	A0A2D0UJT0_POGCB RecName: Full=Isopentenyl-diphosphate Delta-isomerase {ECO:0000256|ARBA:ARBA00012057}; EC=5.3.3.2 {ECO:0000256|ARBA:ARBA00012057}; Flags: Fragment;	Isopentenyl pyrophosphate:dimethylallyl pyrophosphate isomerase	GO:0004452,isopentenyl-diphosphate delta-isomerase activity; GO:0046872,metal ion binding; GO:0015995,chlorophyll biosynthetic process; GO:0050992,dimethylallyl diphosphate biosynthetic process; GO:0008299,isoprenoid biosynthetic process; GO:0015979,photosynthesis; GO:0003674,molecular_function; GO:0003824,catalytic activity; GO:0016853,isomerase activity; GO:0016860,intramolecular oxidoreductase…	PF00293.31:NUDIX domain	28.0308	30.2486	27.7673	17.3026	16.6342	16.3577	2.5021	3.4177	1.8097	0.946388	4.57e-21	7.5e-20	3.66091	5.26e-92	1.15e-90	-2.71177	4.93e-42	6.02e-41
Pcab126627	scaffold_2717	100224	102757	+	K01823 isopentenyl-diphosphate Delta-isomerase [EC:5.3.3.2] | (RefSeq) isopentenyl-diphosphate Delta-isomerase I (A)	down	up	up	ko00900: Terpenoid backbone biosynthesis; ko01100: Metabolic pathways; ko01110: Biosynthesis of secondary metabolites	isopentenyl pyrophosphate isomerase, partial [Pogostemon cablin]	IDI2_CAMAC RecName: Full=Isopentenyl-diphosphate Delta-isomerase II; EC=5.3.3.2; AltName: Full=Isopentenyl pyrophosphate isomerase II; Short=IPP isomerase II;	A0A2D0UJT0_POGCB RecName: Full=Isopentenyl-diphosphate Delta-isomerase {ECO:0000256|ARBA:ARBA00012057}; EC=5.3.3.2 {ECO:0000256|ARBA:ARBA00012057}; Flags: Fragment;	Isopentenyl pyrophosphate:dimethylallyl pyrophosphate isomerase	GO:0004452,isopentenyl-diphosphate delta-isomerase activity; GO:0046872,metal ion binding; GO:0015995,chlorophyll biosynthetic process; GO:0050992,dimethylallyl diphosphate biosynthetic process; GO:0008299,isoprenoid biosynthetic process; GO:0015979,photosynthesis; GO:0003674,molecular_function; GO:0003824,catalytic activity; GO:0016853,isomerase activity; GO:0016860,intramolecular oxidoreductase…	PF00293.31:NUDIX domain	30.4251	30.0014	30.078	17.4139	16.8246	13.5068	3.9592	4.3998	5.6426	1.09345	2.86e-25	5.56e-24	2.88114	3.48e-89	7.38e-88	-1.78403	5.66e-24	4.34e-23
Pcab131757	scaffold_2904	18627	20796	-	K01823 isopentenyl-diphosphate Delta-isomerase [EC:5.3.3.2] | (RefSeq) isopentenyl-diphosphate Delta-isomerase I (A)	down	up	up	ko00900: Terpenoid backbone biosynthesis; ko01100: Metabolic pathways; ko01110: Biosynthesis of secondary metabolites	isopentenyl diphosphate isomerase, partial [Pogostemon cablin]	IDI1_CAMAC RecName: Full=Isopentenyl-diphosphate Delta-isomerase I; EC=5.3.3.2; AltName: Full=Isopentenyl pyrophosphate isomerase I; Short=IPP isomerase I;	A0A2D0UB28_POGCB RecName: Full=Isopentenyl-diphosphate Delta-isomerase {ECO:0000256|ARBA:ARBA00012057}; EC=5.3.3.2 {ECO:0000256|ARBA:ARBA00012057}; Flags: Fragment;	Isopentenyl pyrophosphate:dimethylallyl pyrophosphate isomerase	GO:0004452,isopentenyl-diphosphate delta-isomerase activity; GO:0046872,metal ion binding; GO:0015995,chlorophyll biosynthetic process; GO:0050992,dimethylallyl diphosphate biosynthetic process; GO:0008299,isoprenoid biosynthetic process; GO:0015979,photosynthesis; GO:0003674,molecular_function; GO:0003824,catalytic activity; GO:0016853,isomerase activity; GO:0016860,intramolecular oxidoreductase…	PF00293.31:NUDIX domain	236.286	243.464	238.24	123.491	121.654	123.142	13.2246	14.3332	14.2674	1.13499	3.65e-169	8.16e-167	4.29201	0	0	-3.15309	0	0
isopentenyl-PP	dimethylallyl-PP	EC:1.17.7.4 4-hydroxy-3-methylbut-2-en-1-yl diphosphate reductase
Pcab000834	scaffold_2	6087269	6090968	-	K03527 4-hydroxy-3-methylbut-2-en-1-yl diphosphate reductase [EC:1.17.7.4] | (RefSeq) 4-hydroxy-3-methylbut-2-enyl diphosphate reductase, chloroplastic (A)	up	down	FALSE	ko00900: Terpenoid backbone biosynthesis; ko01100: Metabolic pathways; ko01110: Biosynthesis of secondary metabolites	4-hydroxy-3-methylbut-2-enyl diphosphate reductase, chloroplastic [Sesamum indicum]	ISPH_ARATH RecName: Full=4-hydroxy-3-methylbut-2-enyl diphosphate reductase, chloroplastic {ECO:0000305}; EC=1.17.7.4 {ECO:0000305|PubMed:15863698}; AltName: Full=Protein CHLOROPLAST BIOGENESIS 6 {ECO:0000303|PubMed:15659625}; Flags: Precursor;	A0A6I9TX20_SESIN SubName: Full=4-hydroxy-3-methylbut-2-enyl diphosphate reductase, chloroplastic {ECO:0000313|RefSeq:XP_011088335.1};	--	GO:0009507,chloroplast; GO:0009570,chloroplast stroma; GO:0005886,plasma membrane; GO:0051539,4 iron, 4 sulfur cluster binding; GO:0051745,4-hydroxy-3-methylbut-2-en-1-yl diphosphate reductase activity; GO:0046429,4-hydroxy-3-methylbut-2-en-1-yl diphosphate synthase activity; GO:0046872,metal ion binding; GO:0050992,dimethylallyl diphosphate biosynthetic process; GO:0019288,isopentenyl diphosphat…	PF02401.21:LytB protein	8.6501	9.3064	9.3381	10.6558	10.6548	10.5114	25.6839	27.7027	31.0684	-0.0499109	0.684492	0.784471	-1.43855	1.23e-34	1.08e-33	1.39278	4.59e-36	4.9e-35
Pcab017576	scaffold_135	20897	24172	+	K03527 4-hydroxy-3-methylbut-2-en-1-yl diphosphate reductase [EC:1.17.7.4] | (RefSeq) 4-hydroxy-3-methylbut-2-enyl diphosphate reductase, chloroplastic-like (A)	up	down	down	ko00900: Terpenoid backbone biosynthesis; ko01100: Metabolic pathways; ko01110: Biosynthesis of secondary metabolites	1-hydroxy-2-methyl- 2-butenyl 4-diphosphate reductase2 [Phlomis umbrosa]	ISPH_ARATH RecName: Full=4-hydroxy-3-methylbut-2-enyl diphosphate reductase, chloroplastic {ECO:0000305}; EC=1.17.7.4 {ECO:0000305|PubMed:15863698}; AltName: Full=Protein CHLOROPLAST BIOGENESIS 6 {ECO:0000303|PubMed:15659625}; Flags: Precursor;	A0A5C1WSR3_9LAMI SubName: Full=1-hydroxy-2-methyl-2-butenyl 4-diphosphate reductase2 {ECO:0000313|EMBL:QEN91948.1};	--	GO:0009507,chloroplast; GO:0009570,chloroplast stroma; GO:0005886,plasma membrane; GO:0051539,4 iron, 4 sulfur cluster binding; GO:0051745,4-hydroxy-3-methylbut-2-en-1-yl diphosphate reductase activity; GO:0046429,4-hydroxy-3-methylbut-2-en-1-yl diphosphate synthase activity; GO:0046872,metal ion binding; GO:0050992,dimethylallyl diphosphate biosynthetic process; GO:0019288,isopentenyl diphosphat…	PF02401.21:LytB protein	0.8656	1.1176	0.7635	3.0783	3.6715	3.189	96.816	88.8877	93.7004	-1.68216	2.17e-08	1.54e-07	-6.47321	2.48e-247	1.86e-245	4.79727	0	0
Pcab022073	scaffold_160	740882	744326	+	K03527 4-hydroxy-3-methylbut-2-en-1-yl diphosphate reductase [EC:1.17.7.4] | (RefSeq) 4-hydroxy-3-methylbut-2-enyl diphosphate reductase, chloroplastic-like (A)	up	down	FALSE	ko00900: Terpenoid backbone biosynthesis; ko01100: Metabolic pathways; ko01110: Biosynthesis of secondary metabolites	1-hydroxy-2-methyl- 2-butenyl 4-diphosphate reductase2 [Phlomis umbrosa]	ISPH_ARATH RecName: Full=4-hydroxy-3-methylbut-2-enyl diphosphate reductase, chloroplastic {ECO:0000305}; EC=1.17.7.4 {ECO:0000305|PubMed:15863698}; AltName: Full=Protein CHLOROPLAST BIOGENESIS 6 {ECO:0000303|PubMed:15659625}; Flags: Precursor;	A0A5C1WSR3_9LAMI SubName: Full=1-hydroxy-2-methyl-2-butenyl 4-diphosphate reductase2 {ECO:0000313|EMBL:QEN91948.1};	--	GO:0009507,chloroplast; GO:0009570,chloroplast stroma; GO:0005886,plasma membrane; GO:0051539,4 iron, 4 sulfur cluster binding; GO:0051745,4-hydroxy-3-methylbut-2-en-1-yl diphosphate reductase activity; GO:0046429,4-hydroxy-3-methylbut-2-en-1-yl diphosphate synthase activity; GO:0046872,metal ion binding; GO:0050992,dimethylallyl diphosphate biosynthetic process; GO:0019288,isopentenyl diphosphat…	PF02401.21:LytB protein	2.9644	2.9365	2.6382	6.6033	6.0113	5.8539	172.655	173.735	179.851	-0.940873	8.2e-07	4.83e-06	-5.75181	0	0	4.81456	0	0
Pcab025765	scaffold_155	513824	517576	-	K03527 4-hydroxy-3-methylbut-2-en-1-yl diphosphate reductase [EC:1.17.7.4] | (RefSeq) 4-hydroxy-3-methylbut-2-enyl diphosphate reductase, chloroplastic (A)	up	down	FALSE	ko00900: Terpenoid backbone biosynthesis; ko01100: Metabolic pathways; ko01110: Biosynthesis of secondary metabolites	1-hydroxy-2-methyl- 2-butenyl 4-diphosphate reductase [Phlomis umbrosa]	ISPH_ARATH RecName: Full=4-hydroxy-3-methylbut-2-enyl diphosphate reductase, chloroplastic {ECO:0000305}; EC=1.17.7.4 {ECO:0000305|PubMed:15863698}; AltName: Full=Protein CHLOROPLAST BIOGENESIS 6 {ECO:0000303|PubMed:15659625}; Flags: Precursor;	A0A5C1WR73_9LAMI SubName: Full=1-hydroxy-2-methyl-2-butenyl 4-diphosphate reductase {ECO:0000313|EMBL:QEN91947.1};	--	GO:0009507,chloroplast; GO:0009570,chloroplast stroma; GO:0005886,plasma membrane; GO:0051539,4 iron, 4 sulfur cluster binding; GO:0051745,4-hydroxy-3-methylbut-2-en-1-yl diphosphate reductase activity; GO:0046429,4-hydroxy-3-methylbut-2-en-1-yl diphosphate synthase activity; GO:0046872,metal ion binding; GO:0050992,dimethylallyl diphosphate biosynthetic process; GO:0019288,isopentenyl diphosphat…	PF02401.21:LytB protein	18.8893	24.3759	22.7706	27.7229	25.5792	27.0614	82.1079	81.5296	83.0971	-0.11226	0.232825	0.358705	-1.70953	3.74e-88	7.83e-87	1.60117	2.24e-110	7.28e-109
Pcab048192	scaffold_484	708260	711575	+	K03527 4-hydroxy-3-methylbut-2-en-1-yl diphosphate reductase [EC:1.17.7.4] | (RefSeq) 4-hydroxy-3-methylbut-2-enyl diphosphate reductase, chloroplastic-like (A)	up	down	down	ko00900: Terpenoid backbone biosynthesis; ko01100: Metabolic pathways; ko01110: Biosynthesis of secondary metabolites	1-hydroxy-2-methyl- 2-butenyl 4-diphosphate reductase2 [Phlomis umbrosa]	ISPH_ARATH RecName: Full=4-hydroxy-3-methylbut-2-enyl diphosphate reductase, chloroplastic {ECO:0000305}; EC=1.17.7.4 {ECO:0000305|PubMed:15863698}; AltName: Full=Protein CHLOROPLAST BIOGENESIS 6 {ECO:0000303|PubMed:15659625}; Flags: Precursor;	A0A5C1WSR3_9LAMI SubName: Full=1-hydroxy-2-methyl-2-butenyl 4-diphosphate reductase2 {ECO:0000313|EMBL:QEN91948.1};	--	GO:0009507,chloroplast; GO:0009570,chloroplast stroma; GO:0005886,plasma membrane; GO:0051539,4 iron, 4 sulfur cluster binding; GO:0051745,4-hydroxy-3-methylbut-2-en-1-yl diphosphate reductase activity; GO:0046429,4-hydroxy-3-methylbut-2-en-1-yl diphosphate synthase activity; GO:0046872,metal ion binding; GO:0050992,dimethylallyl diphosphate biosynthetic process; GO:0019288,isopentenyl diphosphat…	PF02401.21:LytB protein	1.4405	2.2903	1.5235	4.2271	4.881	5.3886	119.179	109.602	120.246	-1.29098	8.58e-08	5.68e-07	-5.85961	0	0	4.57457	0	0
Pcab051467	scaffold_626	462043	465250	+	K03527 4-hydroxy-3-methylbut-2-en-1-yl diphosphate reductase [EC:1.17.7.4] | (RefSeq) 4-hydroxy-3-methylbut-2-enyl diphosphate reductase, chloroplastic-like (A)	up	down	down	ko00900: Terpenoid backbone biosynthesis; ko01100: Metabolic pathways; ko01110: Biosynthesis of secondary metabolites	1-hydroxy-2-methyl- 2-butenyl 4-diphosphate reductase2 [Phlomis umbrosa]	ISPH_ARATH RecName: Full=4-hydroxy-3-methylbut-2-enyl diphosphate reductase, chloroplastic {ECO:0000305}; EC=1.17.7.4 {ECO:0000305|PubMed:15863698}; AltName: Full=Protein CHLOROPLAST BIOGENESIS 6 {ECO:0000303|PubMed:15659625}; Flags: Precursor;	A0A5C1WSR3_9LAMI SubName: Full=1-hydroxy-2-methyl-2-butenyl 4-diphosphate reductase2 {ECO:0000313|EMBL:QEN91948.1};	--	GO:0009507,chloroplast; GO:0009570,chloroplast stroma; GO:0005886,plasma membrane; GO:0051539,4 iron, 4 sulfur cluster binding; GO:0051745,4-hydroxy-3-methylbut-2-en-1-yl diphosphate reductase activity; GO:0046429,4-hydroxy-3-methylbut-2-en-1-yl diphosphate synthase activity; GO:0046872,metal ion binding; GO:0050992,dimethylallyl diphosphate biosynthetic process; GO:0019288,isopentenyl diphosphat…	PF02401.21:LytB protein	3.2168	3.0283	4.2411	8.3766	7.3477	8.5449	129.596	120.597	126.042	-1.04044	1.13e-07	7.4e-07	-4.97392	0	0	3.93632	0	0
Pcab066055	scaffold_873	113267	116703	-	K03527 4-hydroxy-3-methylbut-2-en-1-yl diphosphate reductase [EC:1.17.7.4] | (RefSeq) 4-hydroxy-3-methylbut-2-enyl diphosphate reductase, chloroplastic (A)	up	down	FALSE	ko00900: Terpenoid backbone biosynthesis; ko01100: Metabolic pathways; ko01110: Biosynthesis of secondary metabolites	hypothetical protein Pfo_002732 [Paulownia fortunei]	ISPH_ORYSJ RecName: Full=4-hydroxy-3-methylbut-2-enyl diphosphate reductase, chloroplastic {ECO:0000305}; EC=1.17.7.4 {ECO:0000250|UniProtKB:Q94B35}; Flags: Precursor;	A0A6I9TX20_SESIN SubName: Full=4-hydroxy-3-methylbut-2-enyl diphosphate reductase, chloroplastic {ECO:0000313|RefSeq:XP_011088335.1};	--	GO:0009570,chloroplast stroma; GO:0051539,4 iron, 4 sulfur cluster binding; GO:0051745,4-hydroxy-3-methylbut-2-en-1-yl diphosphate reductase activity; GO:0046872,metal ion binding; GO:0050992,dimethylallyl diphosphate biosynthetic process; GO:0019288,isopentenyl diphosphate biosynthetic process, methylerythritol 4-phosphate pathway; GO:0003674,molecular_function; GO:0005488,binding; GO:0051536,ir…	PF02401.21:LytB protein	5.299	4.5871	5.1707	3.869	4.6878	4.5811	13.8366	10.4271	11.181	0.369712	0.0568668	0.11631	-1.03828	2.06e-09	6.72e-09	1.41217	4.77e-16	2.69e-15
Pcab066057	scaffold_873	131622	137129	-	K03527 4-hydroxy-3-methylbut-2-en-1-yl diphosphate reductase [EC:1.17.7.4] | (RefSeq) 4-hydroxy-3-methylbut-2-enyl diphosphate reductase, chloroplastic (A)	up	down	FALSE	ko00900: Terpenoid backbone biosynthesis; ko01100: Metabolic pathways; ko01110: Biosynthesis of secondary metabolites	1-hydroxy-2-methyl- 2-butenyl 4-diphosphate reductase [Phlomis umbrosa]	ISPH_ORYSJ RecName: Full=4-hydroxy-3-methylbut-2-enyl diphosphate reductase, chloroplastic {ECO:0000305}; EC=1.17.7.4 {ECO:0000250|UniProtKB:Q94B35}; Flags: Precursor;	A0A5C1WR73_9LAMI SubName: Full=1-hydroxy-2-methyl-2-butenyl 4-diphosphate reductase {ECO:0000313|EMBL:QEN91947.1};	--	GO:0009570,chloroplast stroma; GO:0051539,4 iron, 4 sulfur cluster binding; GO:0051745,4-hydroxy-3-methylbut-2-en-1-yl diphosphate reductase activity; GO:0046872,metal ion binding; GO:0050992,dimethylallyl diphosphate biosynthetic process; GO:0019288,isopentenyl diphosphate biosynthetic process, methylerythritol 4-phosphate pathway; GO:0003674,molecular_function; GO:0005488,binding; GO:0051536,ir…	PF02401.21:LytB protein	8.0509	8.8452	5.3605	10.2216	9.7657	10.4484	23.0708	24.6585	20.1777	-0.277542	0.101801	0.186952	-1.41385	7.04e-19	3.87e-18	1.14064	2.36e-20	1.59e-19
Pcab066060	scaffold_873	159556	163539	-	K03527 4-hydroxy-3-methylbut-2-en-1-yl diphosphate reductase [EC:1.17.7.4] | (RefSeq) 4-hydroxy-3-methylbut-2-enyl diphosphate reductase, chloroplastic (A)	up	down	FALSE	ko00900: Terpenoid backbone biosynthesis; ko01100: Metabolic pathways; ko01110: Biosynthesis of secondary metabolites	4-hydroxy-3-methylbut-2-enyl diphosphate reductase, chloroplastic [Sesamum indicum]	ISPH_ARATH RecName: Full=4-hydroxy-3-methylbut-2-enyl diphosphate reductase, chloroplastic {ECO:0000305}; EC=1.17.7.4 {ECO:0000305|PubMed:15863698}; AltName: Full=Protein CHLOROPLAST BIOGENESIS 6 {ECO:0000303|PubMed:15659625}; Flags: Precursor;	A0A6I9TX20_SESIN SubName: Full=4-hydroxy-3-methylbut-2-enyl diphosphate reductase, chloroplastic {ECO:0000313|RefSeq:XP_011088335.1};	--	GO:0009507,chloroplast; GO:0009570,chloroplast stroma; GO:0005886,plasma membrane; GO:0051539,4 iron, 4 sulfur cluster binding; GO:0051745,4-hydroxy-3-methylbut-2-en-1-yl diphosphate reductase activity; GO:0046429,4-hydroxy-3-methylbut-2-en-1-yl diphosphate synthase activity; GO:0046872,metal ion binding; GO:0050992,dimethylallyl diphosphate biosynthetic process; GO:0019288,isopentenyl diphosphat…	PF02401.21:LytB protein	13.1128	11.1086	12.6971	15.5701	13.7807	14.4449	53.9919	54.9281	54.6137	-0.0748488	0.506544	0.63714	-1.95418	1.17e-98	2.77e-97	1.88327	6.14e-107	1.93e-105
Pcab084883	scaffold_1478	75607	79452	-	K03527 4-hydroxy-3-methylbut-2-en-1-yl diphosphate reductase [EC:1.17.7.4] | (RefSeq) 4-hydroxy-3-methylbut-2-enyl diphosphate reductase, chloroplastic (A)	up	down	FALSE	ko00900: Terpenoid backbone biosynthesis; ko01100: Metabolic pathways; ko01110: Biosynthesis of secondary metabolites	4-hydroxy-3-methylbut-2-enyl diphosphate reductase, chloroplastic [Sesamum indicum]	ISPH_ARATH RecName: Full=4-hydroxy-3-methylbut-2-enyl diphosphate reductase, chloroplastic {ECO:0000305}; EC=1.17.7.4 {ECO:0000305|PubMed:15863698}; AltName: Full=Protein CHLOROPLAST BIOGENESIS 6 {ECO:0000303|PubMed:15659625}; Flags: Precursor;	A0A6I9TX20_SESIN SubName: Full=4-hydroxy-3-methylbut-2-enyl diphosphate reductase, chloroplastic {ECO:0000313|RefSeq:XP_011088335.1};	--	GO:0009507,chloroplast; GO:0009570,chloroplast stroma; GO:0005886,plasma membrane; GO:0051539,4 iron, 4 sulfur cluster binding; GO:0051745,4-hydroxy-3-methylbut-2-en-1-yl diphosphate reductase activity; GO:0046429,4-hydroxy-3-methylbut-2-en-1-yl diphosphate synthase activity; GO:0046872,metal ion binding; GO:0050992,dimethylallyl diphosphate biosynthetic process; GO:0019288,isopentenyl diphosphat…	PF02401.21:LytB protein	16.6899	16.4482	14.9028	21.512	17.32	22.8195	54.9805	55.8445	53.7968	-0.186998	0.0858297	0.163046	-1.5831	2.38e-74	4.15e-73	1.40022	1.14e-51	1.69e-50
isopentenyl-PP	EC:4.1.1.33 diphosphomevalonate decarboxylase
Pcab024226	scaffold_83	1296398	1300998	-	K01597 diphosphomevalonate decarboxylase [EC:4.1.1.33] | (RefSeq) diphosphomevalonate decarboxylase (A)	down	up	FALSE	ko00900: Terpenoid backbone biosynthesis; ko01100: Metabolic pathways; ko01110: Biosynthesis of secondary metabolites	mevalonate diphosphate decarboxylase, partial [Pogostemon cablin]	MVD2_PANGI RecName: Full=Diphosphomevalonate decarboxylase 2 {ECO:0000305}; Short=Mevalonate-5-pyrophosphate decarboxylase {ECO:0000303|PubMed:24933610}; Short=PgMVD {ECO:0000303|PubMed:24933610}; EC=4.1.1.33 {ECO:0000250|UniProtKB:O23722};	A0A2D0UD20_POGCB RecName: Full=Diphosphomevalonate decarboxylase {ECO:0000256|ARBA:ARBA00012296, ECO:0000256|RuleBase:RU363086}; EC=4.1.1.33 {ECO:0000256|ARBA:ARBA00012296, ECO:0000256|RuleBase:RU363086}; Flags: Fragment;	Mevalonate pyrophosphate decarboxylase	GO:0005829,cytosol; GO:0005777,peroxisome; GO:0005524,ATP binding; GO:0004163,diphosphomevalonate decarboxylase activity; GO:0019287,isopentenyl diphosphate biosynthetic process, mevalonate pathway; GO:0016135,saponin biosynthetic process; GO:0016126,sterol biosynthetic process; GO:0016104,triterpenoid biosynthetic process; GO:0000166,nucleotide binding; GO:0003674,molecular_function; GO:0005488,…	PF18376.4:Mevalonate 5-diphosphate decarboxylase C-terminal domain	17.5413	14.2351	15.5084	13.2362	16.6355	18.8391	5.1053	4.0292	3.4075	0.130923	0.284705	0.417835	2.11529	2.38e-41	2.44e-40	-1.98001	5.54e-33	5.51e-32
Pcab047651	scaffold_287	385044	389567	+	K01597 diphosphomevalonate decarboxylase [EC:4.1.1.33] | (RefSeq) diphosphomevalonate decarboxylase (A)	down	up	FALSE	ko00900: Terpenoid backbone biosynthesis; ko01100: Metabolic pathways; ko01110: Biosynthesis of secondary metabolites	mevalonate diphosphate decarboxylase, partial [Pogostemon cablin]	MVD2_PANGI RecName: Full=Diphosphomevalonate decarboxylase 2 {ECO:0000305}; Short=Mevalonate-5-pyrophosphate decarboxylase {ECO:0000303|PubMed:24933610}; Short=PgMVD {ECO:0000303|PubMed:24933610}; EC=4.1.1.33 {ECO:0000250|UniProtKB:O23722};	A0A2D0UD20_POGCB RecName: Full=Diphosphomevalonate decarboxylase {ECO:0000256|ARBA:ARBA00012296, ECO:0000256|RuleBase:RU363086}; EC=4.1.1.33 {ECO:0000256|ARBA:ARBA00012296, ECO:0000256|RuleBase:RU363086}; Flags: Fragment;	Mevalonate pyrophosphate decarboxylase	GO:0005829,cytosol; GO:0005777,peroxisome; GO:0005524,ATP binding; GO:0004163,diphosphomevalonate decarboxylase activity; GO:0019287,isopentenyl diphosphate biosynthetic process, mevalonate pathway; GO:0016135,saponin biosynthetic process; GO:0016126,sterol biosynthetic process; GO:0016104,triterpenoid biosynthetic process; GO:0000166,nucleotide binding; GO:0003674,molecular_function; GO:0005488,…	PF18376.4:Mevalonate 5-diphosphate decarboxylase C-terminal domain	83.8811	81.8372	87.9358	53.2247	50.1079	51.5988	10.6202	9.7812	9.7097	0.88273	6.38e-56	2.99e-54	3.26972	3.02e-306	3.28e-304	-2.38254	3.36e-142	1.43e-140
Pcab081659	scaffold_835	89580	94531	-	K01597 diphosphomevalonate decarboxylase [EC:4.1.1.33] | (RefSeq) diphosphomevalonate decarboxylase (A)	down	up	FALSE	ko00900: Terpenoid backbone biosynthesis; ko01100: Metabolic pathways; ko01110: Biosynthesis of secondary metabolites	mevalonate diphosphate decarboxylase, partial [Pogostemon cablin]	MVD2_PANGI RecName: Full=Diphosphomevalonate decarboxylase 2 {ECO:0000305}; Short=Mevalonate-5-pyrophosphate decarboxylase {ECO:0000303|PubMed:24933610}; Short=PgMVD {ECO:0000303|PubMed:24933610}; EC=4.1.1.33 {ECO:0000250|UniProtKB:O23722};	A0A2D0UD20_POGCB RecName: Full=Diphosphomevalonate decarboxylase {ECO:0000256|ARBA:ARBA00012296, ECO:0000256|RuleBase:RU363086}; EC=4.1.1.33 {ECO:0000256|ARBA:ARBA00012296, ECO:0000256|RuleBase:RU363086}; Flags: Fragment;	Mevalonate pyrophosphate decarboxylase	GO:0005829,cytosol; GO:0005777,peroxisome; GO:0005524,ATP binding; GO:0004163,diphosphomevalonate decarboxylase activity; GO:0019287,isopentenyl diphosphate biosynthetic process, mevalonate pathway; GO:0016135,saponin biosynthetic process; GO:0016126,sterol biosynthetic process; GO:0016104,triterpenoid biosynthetic process; GO:0000166,nucleotide binding; GO:0003674,molecular_function; GO:0005488,…	PF18376.4:Mevalonate 5-diphosphate decarboxylase C-terminal domain	20.9402	28.4056	25.7015	16.3417	15.9677	16.2347	5.4527	4.3788	3.8595	0.799501	5.4e-16	6.83e-15	2.65272	7.52e-80	1.41e-78	-1.84965	1.12e-42	1.39e-41
Pcab103912	scaffold_542_228868_711637	453858	458701	+	K01597 diphosphomevalonate decarboxylase [EC:4.1.1.33] | (RefSeq) diphosphomevalonate decarboxylase (A)	down	up	up	ko00900: Terpenoid backbone biosynthesis; ko01100: Metabolic pathways; ko01110: Biosynthesis of secondary metabolites	mevalonate diphosphate decarboxylase, partial [Pogostemon cablin]	MVD2_PANGI RecName: Full=Diphosphomevalonate decarboxylase 2 {ECO:0000305}; Short=Mevalonate-5-pyrophosphate decarboxylase {ECO:0000303|PubMed:24933610}; Short=PgMVD {ECO:0000303|PubMed:24933610}; EC=4.1.1.33 {ECO:0000250|UniProtKB:O23722};	A0A2D0UD20_POGCB RecName: Full=Diphosphomevalonate decarboxylase {ECO:0000256|ARBA:ARBA00012296, ECO:0000256|RuleBase:RU363086}; EC=4.1.1.33 {ECO:0000256|ARBA:ARBA00012296, ECO:0000256|RuleBase:RU363086}; Flags: Fragment;	Mevalonate pyrophosphate decarboxylase	GO:0005829,cytosol; GO:0005777,peroxisome; GO:0005524,ATP binding; GO:0004163,diphosphomevalonate decarboxylase activity; GO:0019287,isopentenyl diphosphate biosynthetic process, mevalonate pathway; GO:0016135,saponin biosynthetic process; GO:0016126,sterol biosynthetic process; GO:0016104,triterpenoid biosynthetic process; GO:0000166,nucleotide binding; GO:0003674,molecular_function; GO:0005488,…	PF18376.4:Mevalonate 5-diphosphate decarboxylase C-terminal domain	69.316	66.6494	67.746	34.2856	32.6189	32.6331	5.7096	5.4909	5.6283	1.20495	1.1e-95	1.01e-93	3.79172	0	0	-2.58239	1.22e-129	4.66e-128
mevalonate-5PP	EC:2.7.4.2 phosphomevalonate kinase
Pcab001699	scaffold_23	1086606	1092730	+	K00938 phosphomevalonate kinase [EC:2.7.4.2] | (RefSeq) uncharacterized protein LOC112702714 (A)	FALSE	up	FALSE	ko00900: Terpenoid backbone biosynthesis; ko01100: Metabolic pathways; ko01110: Biosynthesis of secondary metabolites	hypothetical protein Pfo_019901 [Paulownia fortunei]	CID3_ARATH RecName: Full=Polyadenylate-binding protein-interacting protein 3; Short=PABP-interacting protein 3; Short=Poly(A)-binding protein-interacting protein 3; AltName: Full=PAM2-containing protein CID3; AltName: Full=Protein CTC-INTERACTING DOMAIN 3;	A0A8M8V3U5_SESIN SubName: Full=polyadenylate-binding protein-interacting protein 4-like {ECO:0000313|RefSeq:XP_020550751.1};	Protein interacting with poly(A)-binding protein	GO:0010494,cytoplasmic stress granule; GO:0003723,RNA binding; GO:0034063,stress granule assembly; GO:0003674,molecular_function; GO:0003676,nucleic acid binding; GO:0005488,binding; GO:0097159,organic cyclic compound binding; GO:1901363,heterocyclic compound binding; GO:0006996,organelle organization; GO:0008150,biological_process; GO:0009987,cellular process; GO:0016043,cellular component organ…	PF14438.9:Ataxin 2 SM domain	7.5125	6.9414	6.691	7.244	5.3478	7.0846	4.3024	3.8183	3.4337	0.276028	0.0586279	0.119272	1.06881	2e-10	7.04e-10	-0.787991	9.36e-06	2.54e-05
Pcab016054	scaffold_54	771493	775873	+	K00938 phosphomevalonate kinase [EC:2.7.4.2] | (RefSeq) phosphomevalonate kinase, peroxisomal (A)	down	up	FALSE	ko00900: Terpenoid backbone biosynthesis; ko01100: Metabolic pathways; ko01110: Biosynthesis of secondary metabolites	phosphomevalonate kinase [Phlomis umbrosa]	PMK_ARATH RecName: Full=Phosphomevalonate kinase, peroxisomal {ECO:0000305}; EC=2.7.4.2 {ECO:0000269|PubMed:24327557}; AltName: Full=5-phosphomevalonate kinase {ECO:0000303|PubMed:21655959}; Short=AtPMK {ECO:0000303|PubMed:21655959};	A0A1P8D6W2_9LAMI RecName: Full=Phosphomevalonate kinase {ECO:0000256|ARBA:ARBA00012958}; EC=2.7.4.2 {ECO:0000256|ARBA:ARBA00012958};	Phosphomevalonate kinase	GO:0005777,peroxisome; GO:0005524,ATP binding; GO:0004631,phosphomevalonate kinase activity; GO:0010142,farnesyl diphosphate biosynthetic process, mevalonate pathway; GO:0019287,isopentenyl diphosphate biosynthetic process, mevalonate pathway; GO:0016310,phosphorylation; GO:0016126,sterol biosynthetic process; GO:0000166,nucleotide binding; GO:0003674,molecular_function; GO:0005488,binding; GO:00…	PF00288.29:GHMP kinases N terminal domain	10.9175	10.2668	12.6014	7.47	9.7865	8.1652	3.1348	2.6735	2.8801	0.582197	0.000286605	0.00111651	2.15553	2.18e-24	1.45e-23	-1.56946	5.39e-12	2.46e-11
Pcab021645	scaffold_182	1265040	1271733	-	K00938 phosphomevalonate kinase [EC:2.7.4.2] | (RefSeq) uncharacterized protein LOC112702714 (A)	FALSE	up	FALSE	ko00900: Terpenoid backbone biosynthesis; ko01100: Metabolic pathways; ko01110: Biosynthesis of secondary metabolites	hypothetical protein Pfo_019901 [Paulownia fortunei]	CID3_ARATH RecName: Full=Polyadenylate-binding protein-interacting protein 3; Short=PABP-interacting protein 3; Short=Poly(A)-binding protein-interacting protein 3; AltName: Full=PAM2-containing protein CID3; AltName: Full=Protein CTC-INTERACTING DOMAIN 3;	A0A8M8V3U5_SESIN SubName: Full=polyadenylate-binding protein-interacting protein 4-like {ECO:0000313|RefSeq:XP_020550751.1};	Protein interacting with poly(A)-binding protein	GO:0010494,cytoplasmic stress granule; GO:0003723,RNA binding; GO:0034063,stress granule assembly; GO:0003674,molecular_function; GO:0003676,nucleic acid binding; GO:0005488,binding; GO:0097159,organic cyclic compound binding; GO:1901363,heterocyclic compound binding; GO:0006996,organelle organization; GO:0008150,biological_process; GO:0009987,cellular process; GO:0016043,cellular component organ…	PF14438.9:Ataxin 2 SM domain	5.851	4.9781	6.169	5.5384	4.4925	5.8359	2.619	3.2743	2.3842	0.270973	0.0760903	0.147788	1.22767	9.9e-11	3.55e-10	-0.95209	6.87e-07	2.11e-06
Pcab032998	scaffold_91	1001422	1007379	-	K00938 phosphomevalonate kinase [EC:2.7.4.2] | (RefSeq) phosphomevalonate kinase, peroxisomal (A)	FALSE	up	FALSE	ko00900: Terpenoid backbone biosynthesis; ko01100: Metabolic pathways; ko01110: Biosynthesis of secondary metabolites	phosphomevalonate kinase [Phlomis umbrosa]	PMK_ARATH RecName: Full=Phosphomevalonate kinase, peroxisomal {ECO:0000305}; EC=2.7.4.2 {ECO:0000269|PubMed:24327557}; AltName: Full=5-phosphomevalonate kinase {ECO:0000303|PubMed:21655959}; Short=AtPMK {ECO:0000303|PubMed:21655959};	A0A1P8D6W2_9LAMI RecName: Full=Phosphomevalonate kinase {ECO:0000256|ARBA:ARBA00012958}; EC=2.7.4.2 {ECO:0000256|ARBA:ARBA00012958};	Phosphomevalonate kinase	GO:0005777,peroxisome; GO:0005524,ATP binding; GO:0004631,phosphomevalonate kinase activity; GO:0010142,farnesyl diphosphate biosynthetic process, mevalonate pathway; GO:0019287,isopentenyl diphosphate biosynthetic process, mevalonate pathway; GO:0016310,phosphorylation; GO:0016126,sterol biosynthetic process; GO:0000166,nucleotide binding; GO:0003674,molecular_function; GO:0005488,binding; GO:00…	PF00288.29:GHMP kinases N terminal domain	5.5047	4.7059	4.9755	3.2856	4.2489	2.9484	2.0654	2.8951	1.7701	0.707102	0.00026888	0.00105284	1.3622	4.22e-09	1.35e-08	-0.652768	0.0119085	0.0209936
Pcab040874	scaffold_525	160185	166887	-	K00938 phosphomevalonate kinase [EC:2.7.4.2] | (RefSeq) uncharacterized protein LOC112702714 (A)	FALSE	up	FALSE	ko00900: Terpenoid backbone biosynthesis; ko01100: Metabolic pathways; ko01110: Biosynthesis of secondary metabolites	hypothetical protein Pfo_019901 [Paulownia fortunei]	CID3_ARATH RecName: Full=Polyadenylate-binding protein-interacting protein 3; Short=PABP-interacting protein 3; Short=Poly(A)-binding protein-interacting protein 3; AltName: Full=PAM2-containing protein CID3; AltName: Full=Protein CTC-INTERACTING DOMAIN 3;	A0A8M8V3U5_SESIN SubName: Full=polyadenylate-binding protein-interacting protein 4-like {ECO:0000313|RefSeq:XP_020550751.1};	Protein interacting with poly(A)-binding protein	GO:0010494,cytoplasmic stress granule; GO:0003723,RNA binding; GO:0034063,stress granule assembly; GO:0003674,molecular_function; GO:0003676,nucleic acid binding; GO:0005488,binding; GO:0097159,organic cyclic compound binding; GO:1901363,heterocyclic compound binding; GO:0006996,organelle organization; GO:0008150,biological_process; GO:0009987,cellular process; GO:0016043,cellular component organ…	PF14438.9:Ataxin 2 SM domain	6.5607	6.559	7.1063	5.7913	5.3765	6.9806	3.3773	3.1176	3.4563	0.328665	0.0177114	0.0434693	1.21706	1.41e-13	6.02e-13	-0.883953	3.46e-07	1.09e-06
Pcab064148	scaffold_379	731976	737735	-	K00938 phosphomevalonate kinase [EC:2.7.4.2] | (RefSeq) phosphomevalonate kinase, peroxisomal (A)	down	up	FALSE	ko00900: Terpenoid backbone biosynthesis; ko01100: Metabolic pathways; ko01110: Biosynthesis of secondary metabolites	phosphomevalonate kinase [Phlomis umbrosa]	PMK_ARATH RecName: Full=Phosphomevalonate kinase, peroxisomal {ECO:0000305}; EC=2.7.4.2 {ECO:0000269|PubMed:24327557}; AltName: Full=5-phosphomevalonate kinase {ECO:0000303|PubMed:21655959}; Short=AtPMK {ECO:0000303|PubMed:21655959};	A0A1P8D6W2_9LAMI RecName: Full=Phosphomevalonate kinase {ECO:0000256|ARBA:ARBA00012958}; EC=2.7.4.2 {ECO:0000256|ARBA:ARBA00012958};	Phosphomevalonate kinase	GO:0005777,peroxisome; GO:0005524,ATP binding; GO:0004631,phosphomevalonate kinase activity; GO:0010142,farnesyl diphosphate biosynthetic process, mevalonate pathway; GO:0019287,isopentenyl diphosphate biosynthetic process, mevalonate pathway; GO:0016310,phosphorylation; GO:0016126,sterol biosynthetic process; GO:0000166,nucleotide binding; GO:0003674,molecular_function; GO:0005488,binding; GO:00…	PF00288.29:GHMP kinases N terminal domain	13.1132	13.1303	12.6503	10.1101	10.6394	10.2116	3.8083	3.997	4.1792	0.501348	7.33e-06	3.76e-05	1.89001	1.01e-35	9.12e-35	-1.38479	2.14e-18	1.34e-17
Pcab099246	scaffold_2468	72251	79078	+	K00938 phosphomevalonate kinase [EC:2.7.4.2] | (RefSeq) uncharacterized protein LOC112702714 (A)	down	up	FALSE	ko00900: Terpenoid backbone biosynthesis; ko01100: Metabolic pathways; ko01110: Biosynthesis of secondary metabolites	hypothetical protein Pfo_019901 [Paulownia fortunei]	CID3_ARATH RecName: Full=Polyadenylate-binding protein-interacting protein 3; Short=PABP-interacting protein 3; Short=Poly(A)-binding protein-interacting protein 3; AltName: Full=PAM2-containing protein CID3; AltName: Full=Protein CTC-INTERACTING DOMAIN 3;	A0A8M8V3U5_SESIN SubName: Full=polyadenylate-binding protein-interacting protein 4-like {ECO:0000313|RefSeq:XP_020550751.1};	Protein interacting with poly(A)-binding protein	GO:0010494,cytoplasmic stress granule; GO:0003723,RNA binding; GO:0034063,stress granule assembly; GO:0003674,molecular_function; GO:0003676,nucleic acid binding; GO:0005488,binding; GO:0097159,organic cyclic compound binding; GO:1901363,heterocyclic compound binding; GO:0006996,organelle organization; GO:0008150,biological_process; GO:0009987,cellular process; GO:0016043,cellular component organ…	PF14438.9:Ataxin 2 SM domain	7.2955	6.5153	8.9766	8.3403	6.3115	6.612	2.9777	3.8207	3.4123	0.26951	0.0725368	0.142116	1.34567	7.75e-14	3.37e-13	-1.07154	2.23e-09	8.48e-09
Pcab129192	scaffold_3232	125185	130636	+	K00938 phosphomevalonate kinase [EC:2.7.4.2] | (RefSeq) phosphomevalonate kinase, peroxisomal (A)	down	up	FALSE	ko00900: Terpenoid backbone biosynthesis; ko01100: Metabolic pathways; ko01110: Biosynthesis of secondary metabolites	phosphomevalonate kinase [Phlomis umbrosa]	PMK_ARATH RecName: Full=Phosphomevalonate kinase, peroxisomal {ECO:0000305}; EC=2.7.4.2 {ECO:0000269|PubMed:24327557}; AltName: Full=5-phosphomevalonate kinase {ECO:0000303|PubMed:21655959}; Short=AtPMK {ECO:0000303|PubMed:21655959};	A0A1P8D6W2_9LAMI RecName: Full=Phosphomevalonate kinase {ECO:0000256|ARBA:ARBA00012958}; EC=2.7.4.2 {ECO:0000256|ARBA:ARBA00012958};	Phosphomevalonate kinase	GO:0005777,peroxisome; GO:0005524,ATP binding; GO:0004631,phosphomevalonate kinase activity; GO:0010142,farnesyl diphosphate biosynthetic process, mevalonate pathway; GO:0019287,isopentenyl diphosphate biosynthetic process, mevalonate pathway; GO:0016310,phosphorylation; GO:0016126,sterol biosynthetic process; GO:0000166,nucleotide binding; GO:0003674,molecular_function; GO:0005488,binding; GO:00…	PF00288.29:GHMP kinases N terminal domain	22.4674	22.8635	24.2571	13.9153	13.3815	13.5375	6.4703	5.2342	6.8916	0.940365	2.57e-19	3.89e-18	2.10004	7.05e-49	8.3e-48	-1.15485	4.5e-13	2.19e-12
mevalonate-5P	EC:2.7.1.36 mevalonate kinase
Pcab000210	scaffold_2	1405809	1408791	-	K00869 mevalonate kinase [EC:2.7.1.36] | (RefSeq) mevalonate kinase (A)	down	up	up	ko00900: Terpenoid backbone biosynthesis; ko01100: Metabolic pathways; ko01110: Biosynthesis of secondary metabolites; ko04146: Peroxisome	mevalonate kinase [Phlomis umbrosa]	KIME_ARATH RecName: Full=Mevalonate kinase {ECO:0000305}; Short=MK; EC=2.7.1.36 {ECO:0000250|UniProtKB:Q03426};	A0A1P8D6U4_9LAMI RecName: Full=Mevalonate kinase {ECO:0000256|ARBA:ARBA00012103, ECO:0000256|RuleBase:RU363087}; Short=MK {ECO:0000256|RuleBase:RU363087}; EC=2.7.1.36 {ECO:0000256|ARBA:ARBA00012103, ECO:0000256|RuleBase:RU363087};	Mevalonate kinase MVK/ERG12	GO:0005737,cytoplasm; GO:0005829,cytosol; GO:0005524,ATP binding; GO:0000287,magnesium ion binding; GO:0004496,mevalonate kinase activity; GO:0019287,isopentenyl diphosphate biosynthetic process, mevalonate pathway; GO:0016310,phosphorylation; GO:0016126,sterol biosynthetic process; GO:0000166,nucleotide binding; GO:0003674,molecular_function; GO:0005488,binding; GO:0017076,purine nucleotide bind…	PF00288.29:GHMP kinases N terminal domain	28.963	27.8855	29.6069	14.9916	15.6597	14.7198	6.1424	4.216	5.3528	1.10201	7.74e-31	1.85e-29	2.66217	2.19e-80	4.14e-79	-1.55474	5.69e-22	4.07e-21
Pcab006544	scaffold_61	249393	252246	+	K00869 mevalonate kinase [EC:2.7.1.36] | (RefSeq) mevalonate kinase-like (A)	down	up	up	ko00900: Terpenoid backbone biosynthesis; ko01100: Metabolic pathways; ko01110: Biosynthesis of secondary metabolites; ko04146: Peroxisome	mevalonate kinase [Phlomis umbrosa]	KIME_ARATH RecName: Full=Mevalonate kinase {ECO:0000305}; Short=MK; EC=2.7.1.36 {ECO:0000250|UniProtKB:Q03426};	A0A1P8D6U4_9LAMI RecName: Full=Mevalonate kinase {ECO:0000256|ARBA:ARBA00012103, ECO:0000256|RuleBase:RU363087}; Short=MK {ECO:0000256|RuleBase:RU363087}; EC=2.7.1.36 {ECO:0000256|ARBA:ARBA00012103, ECO:0000256|RuleBase:RU363087};	Mevalonate kinase MVK/ERG12	GO:0005737,cytoplasm; GO:0005829,cytosol; GO:0005524,ATP binding; GO:0000287,magnesium ion binding; GO:0004496,mevalonate kinase activity; GO:0019287,isopentenyl diphosphate biosynthetic process, mevalonate pathway; GO:0016310,phosphorylation; GO:0016126,sterol biosynthetic process; GO:0000166,nucleotide binding; GO:0003674,molecular_function; GO:0005488,binding; GO:0017076,purine nucleotide bind…	PF00288.29:GHMP kinases N terminal domain	39.2399	37.5265	35.8425	21.5984	19.4351	20.409	4.7769	4.687	4.5605	1.04591	4.11e-33	1.06e-31	3.19945	2.07e-129	6.58e-128	-2.14907	2.75e-48	3.82e-47
Pcab036682	scaffold_454	553035	555873	-	K00869 mevalonate kinase [EC:2.7.1.36] | (RefSeq) mevalonate kinase (A)	down	up	up	ko00900: Terpenoid backbone biosynthesis; ko01100: Metabolic pathways; ko01110: Biosynthesis of secondary metabolites; ko04146: Peroxisome	mevalonate kinase [Phlomis umbrosa]	KIME_ARATH RecName: Full=Mevalonate kinase {ECO:0000305}; Short=MK; EC=2.7.1.36 {ECO:0000250|UniProtKB:Q03426};	A0A1P8D6U4_9LAMI RecName: Full=Mevalonate kinase {ECO:0000256|ARBA:ARBA00012103, ECO:0000256|RuleBase:RU363087}; Short=MK {ECO:0000256|RuleBase:RU363087}; EC=2.7.1.36 {ECO:0000256|ARBA:ARBA00012103, ECO:0000256|RuleBase:RU363087};	Mevalonate kinase MVK/ERG12	GO:0005737,cytoplasm; GO:0005829,cytosol; GO:0005524,ATP binding; GO:0000287,magnesium ion binding; GO:0004496,mevalonate kinase activity; GO:0019287,isopentenyl diphosphate biosynthetic process, mevalonate pathway; GO:0016310,phosphorylation; GO:0016126,sterol biosynthetic process; GO:0000166,nucleotide binding; GO:0003674,molecular_function; GO:0005488,binding; GO:0017076,purine nucleotide bind…	PF00288.29:GHMP kinases N terminal domain	25.9204	28.2892	26.771	13.7445	15.3069	13.4992	6.2282	4.6366	4.5062	1.10037	1.75e-27	3.74e-26	2.59902	1.42e-74	2.48e-73	-1.49377	1.94e-19	1.26e-18
Pcab041093	scaffold_646	118651	121626	-	K00869 mevalonate kinase [EC:2.7.1.36] | (RefSeq) mevalonate kinase (A)	down	up	FALSE	ko00900: Terpenoid backbone biosynthesis; ko01100: Metabolic pathways; ko01110: Biosynthesis of secondary metabolites; ko04146: Peroxisome	mevalonate kinase [Phlomis umbrosa]	KIME_ARATH RecName: Full=Mevalonate kinase {ECO:0000305}; Short=MK; EC=2.7.1.36 {ECO:0000250|UniProtKB:Q03426};	A0A1P8D6U4_9LAMI RecName: Full=Mevalonate kinase {ECO:0000256|ARBA:ARBA00012103, ECO:0000256|RuleBase:RU363087}; Short=MK {ECO:0000256|RuleBase:RU363087}; EC=2.7.1.36 {ECO:0000256|ARBA:ARBA00012103, ECO:0000256|RuleBase:RU363087};	Mevalonate kinase MVK/ERG12	GO:0005737,cytoplasm; GO:0005829,cytosol; GO:0005524,ATP binding; GO:0000287,magnesium ion binding; GO:0004496,mevalonate kinase activity; GO:0019287,isopentenyl diphosphate biosynthetic process, mevalonate pathway; GO:0016310,phosphorylation; GO:0016126,sterol biosynthetic process; GO:0000166,nucleotide binding; GO:0003674,molecular_function; GO:0005488,binding; GO:0017076,purine nucleotide bind…	PF00288.29:GHMP kinases N terminal domain	18.8384	17.0442	16.7282	12.584	11.8963	12.9235	3.862	4.2247	4.0093	0.66471	6.79e-09	5.07e-08	2.31219	5.96e-47	6.79e-46	-1.64332	2.7e-22	1.95e-21
mevalonate	EC:1.1.1.34 hydroxymethylglutaryl-CoA reductase (NADPH)
Pcab001124	scaffold_4_900905_6019725	1428607	1430772	-	K00021 hydroxymethylglutaryl-CoA reductase (NADPH) [EC:1.1.1.34] | (RefSeq) 3-hydroxy-3-methylglutaryl-coenzyme A reductase (A)	down	up	up	ko00900: Terpenoid backbone biosynthesis; ko01100: Metabolic pathways; ko01110: Biosynthesis of secondary metabolites	HMG CoA reductase, partial [Pogostemon cablin]	HMDH_CAMAC RecName: Full=3-hydroxy-3-methylglutaryl-coenzyme A reductase; Short=HMG-CoA reductase; EC=1.1.1.34;	A0A2D0U5C6_POGCB RecName: Full=3-hydroxy-3-methylglutaryl coenzyme A reductase {ECO:0000256|RuleBase:RU361219}; Short=HMG-CoA reductase {ECO:0000256|RuleBase:RU361219}; EC=1.1.1.34 {ECO:0000256|RuleBase:RU361219}; Flags: Fragment;	3-hydroxy-3-methylglutaryl-CoA (HMG-CoA) reductase	GO:0005789,endoplasmic reticulum membrane; GO:0016021,integral component of membrane; GO:0004420,hydroxymethylglutaryl-CoA reductase (NADPH) activity; GO:0015936,coenzyme A metabolic process; GO:0008299,isoprenoid biosynthetic process; GO:0003674,molecular_function; GO:0003824,catalytic activity; GO:0016491,oxidoreductase activity; GO:0016614,oxidoreductase activity, acting on CH-OH group of dono…	PF00368.21:Hydroxymethylglutaryl-coenzyme A reductase	232.412	232.938	244.065	86.1111	90.5784	86.7389	8.8321	7.9887	8.5158	1.60095	1.2e-277	6.15e-275	5.00316	0	0	-3.3979	5.34e-297	6.47e-295
Pcab012674	scaffold_71	1315786	1318036	-	K00021 hydroxymethylglutaryl-CoA reductase (NADPH) [EC:1.1.1.34] | (RefSeq) 3-hydroxy-3-methylglutaryl-coenzyme A reductase (A)	down	up	FALSE	ko00900: Terpenoid backbone biosynthesis; ko01100: Metabolic pathways; ko01110: Biosynthesis of secondary metabolites	HMG CoA reductase, partial [Pogostemon cablin]	HMDH_CAMAC RecName: Full=3-hydroxy-3-methylglutaryl-coenzyme A reductase; Short=HMG-CoA reductase; EC=1.1.1.34;	A0A2D0U5C6_POGCB RecName: Full=3-hydroxy-3-methylglutaryl coenzyme A reductase {ECO:0000256|RuleBase:RU361219}; Short=HMG-CoA reductase {ECO:0000256|RuleBase:RU361219}; EC=1.1.1.34 {ECO:0000256|RuleBase:RU361219}; Flags: Fragment;	3-hydroxy-3-methylglutaryl-CoA (HMG-CoA) reductase	GO:0005789,endoplasmic reticulum membrane; GO:0016021,integral component of membrane; GO:0004420,hydroxymethylglutaryl-CoA reductase (NADPH) activity; GO:0015936,coenzyme A metabolic process; GO:0008299,isoprenoid biosynthetic process; GO:0003674,molecular_function; GO:0003824,catalytic activity; GO:0016491,oxidoreductase activity; GO:0016614,oxidoreductase activity, acting on CH-OH group of dono…	PF00368.21:Hydroxymethylglutaryl-coenzyme A reductase	272.455	262.171	275.175	152.268	152.614	159.876	23.7225	24.2562	25.1788	0.973152	1.2e-132	1.8e-130	3.66075	0	0	-2.68347	0	0
Pcab029089	scaffold_35	2345315	2347018	+	K00021 hydroxymethylglutaryl-CoA reductase (NADPH) [EC:1.1.1.34] | (RefSeq) 3-hydroxy-3-methylglutaryl-coenzyme A reductase (A)	down	up	up	ko00900: Terpenoid backbone biosynthesis; ko01100: Metabolic pathways; ko01110: Biosynthesis of secondary metabolites	HMG CoA reductase, partial [Pogostemon cablin]	HMDH_CAMAC RecName: Full=3-hydroxy-3-methylglutaryl-coenzyme A reductase; Short=HMG-CoA reductase; EC=1.1.1.34;	A0A2D0U5C6_POGCB RecName: Full=3-hydroxy-3-methylglutaryl coenzyme A reductase {ECO:0000256|RuleBase:RU361219}; Short=HMG-CoA reductase {ECO:0000256|RuleBase:RU361219}; EC=1.1.1.34 {ECO:0000256|RuleBase:RU361219}; Flags: Fragment;	3-hydroxy-3-methylglutaryl-CoA (HMG-CoA) reductase	GO:0005789,endoplasmic reticulum membrane; GO:0016021,integral component of membrane; GO:0004420,hydroxymethylglutaryl-CoA reductase (NADPH) activity; GO:0015936,coenzyme A metabolic process; GO:0008299,isoprenoid biosynthetic process; GO:0003674,molecular_function; GO:0003824,catalytic activity; GO:0016491,oxidoreductase activity; GO:0016614,oxidoreductase activity, acting on CH-OH group of dono…	PF00368.21:Hydroxymethylglutaryl-coenzyme A reductase	52.6568	54.8049	56.0355	17.5733	15.1984	15.6967	0.6708	0.516	0.3243	1.92477	3.67e-133	5.57e-131	6.96523	7.3e-149	2.8e-147	-5.0349	6.52e-68	1.24e-66
Pcab035583	scaffold_249	308149	310595	-	K00021 hydroxymethylglutaryl-CoA reductase (NADPH) [EC:1.1.1.34] | (RefSeq) 3-hydroxy-3-methylglutaryl coenzyme A reductase 1-like (A)	down	up	FALSE	ko00900: Terpenoid backbone biosynthesis; ko01100: Metabolic pathways; ko01110: Biosynthesis of secondary metabolites	hydroxy-3-methylglutaryl-coenzyme A reductase 1 [Phlomis umbrosa]	HMGR1_PANGI RecName: Full=3-hydroxy-3-methylglutaryl coenzyme A reductase 1 {ECO:0000303|PubMed:24569845}; Short=HMG-CoA reductase 1 {ECO:0000303|PubMed:24569845}; Short=Hydroxymethylglutaryl-CoA reductase {ECO:0000255|PROSITE-ProRule:PRU10003}; Short=PgHMGR1 {ECO:0000303|PubMed:24569845}; EC=1.1.1.34 {ECO:0000255|PROSITE-ProRule:PRU10003};	A0A1P8D6U0_9LAMI RecName: Full=3-hydroxy-3-methylglutaryl coenzyme A reductase {ECO:0000256|RuleBase:RU361219}; Short=HMG-CoA reductase {ECO:0000256|RuleBase:RU361219}; EC=1.1.1.34 {ECO:0000256|RuleBase:RU361219};	3-hydroxy-3-methylglutaryl-CoA (HMG-CoA) reductase	GO:0031969,chloroplast membrane; GO:0005789,endoplasmic reticulum membrane; GO:0016021,integral component of membrane; GO:0005778,peroxisomal membrane; GO:0004420,hydroxymethylglutaryl-CoA reductase (NADPH) activity; GO:0015936,coenzyme A metabolic process; GO:0009646,response to absence of light; GO:0009753,response to jasmonic acid; GO:0016135,saponin biosynthetic process; GO:0016104,triterpeno…	PF00368.21:Hydroxymethylglutaryl-coenzyme A reductase	2.9915	2.5909	2.655	2.6222	3.7287	3.0357	1.5102	2.006	0.8475	-0.0150007	0.947533	0.968295	1.10812	0.000355764	0.000699077	-1.11968	0.000229321	0.000526082
Pcab044376	scaffold_128	2024462	2026147	+	K00021 hydroxymethylglutaryl-CoA reductase (NADPH) [EC:1.1.1.34] | (RefSeq) 3-hydroxy-3-methylglutaryl-coenzyme A reductase (A)	FALSE	up	up	ko00900: Terpenoid backbone biosynthesis; ko01100: Metabolic pathways; ko01110: Biosynthesis of secondary metabolites	HMG CoA reductase, partial [Pogostemon cablin]	HMDH_NICSY RecName: Full=3-hydroxy-3-methylglutaryl-coenzyme A reductase; Short=HMG-CoA reductase; EC=1.1.1.34;	A0A2D0U5C6_POGCB RecName: Full=3-hydroxy-3-methylglutaryl coenzyme A reductase {ECO:0000256|RuleBase:RU361219}; Short=HMG-CoA reductase {ECO:0000256|RuleBase:RU361219}; EC=1.1.1.34 {ECO:0000256|RuleBase:RU361219}; Flags: Fragment;	3-hydroxy-3-methylglutaryl-CoA (HMG-CoA) reductase	GO:0005789,endoplasmic reticulum membrane; GO:0016021,integral component of membrane; GO:0004420,hydroxymethylglutaryl-CoA reductase (NADPH) activity; GO:0015936,coenzyme A metabolic process; GO:0008299,isoprenoid biosynthetic process; GO:0003674,molecular_function; GO:0003824,catalytic activity; GO:0016491,oxidoreductase activity; GO:0016614,oxidoreductase activity, acting on CH-OH group of dono…	PF00368.21:Hydroxymethylglutaryl-coenzyme A reductase	2.6794	2.9895	3.0635	1.5815	0.8166	1.09	0.4383	0.9917	0.7872	1.49097	3.63e-06	1.95e-05	2.15066	1.83e-08	5.54e-08	-0.658255	0.182333	0.243665
Pcab044381	scaffold_128	2075185	2076390	-	K00021 hydroxymethylglutaryl-CoA reductase (NADPH) [EC:1.1.1.34] | (RefSeq) 3-hydroxy-3-methylglutaryl-coenzyme A reductase (A)	FALSE	up	up	ko00900: Terpenoid backbone biosynthesis; ko01100: Metabolic pathways; ko01110: Biosynthesis of secondary metabolites	HMG CoA reductase, partial [Pogostemon cablin]	HMDH_CAMAC RecName: Full=3-hydroxy-3-methylglutaryl-coenzyme A reductase; Short=HMG-CoA reductase; EC=1.1.1.34;	A0A2D0U5C6_POGCB RecName: Full=3-hydroxy-3-methylglutaryl coenzyme A reductase {ECO:0000256|RuleBase:RU361219}; Short=HMG-CoA reductase {ECO:0000256|RuleBase:RU361219}; EC=1.1.1.34 {ECO:0000256|RuleBase:RU361219}; Flags: Fragment;	3-hydroxy-3-methylglutaryl-CoA (HMG-CoA) reductase	GO:0005789,endoplasmic reticulum membrane; GO:0016021,integral component of membrane; GO:0004420,hydroxymethylglutaryl-CoA reductase (NADPH) activity; GO:0015936,coenzyme A metabolic process; GO:0008299,isoprenoid biosynthetic process; GO:0003674,molecular_function; GO:0003824,catalytic activity; GO:0016491,oxidoreductase activity; GO:0016614,oxidoreductase activity, acting on CH-OH group of dono…	PF00368.21:Hydroxymethylglutaryl-coenzyme A reductase	3.8702	3.7703	2.6748	1.2099	1.3421	1.2137	1.0935	1.8836	0.3273	1.6279	4.25e-07	2.59e-06	1.83003	1.29e-05	2.99e-05	-0.202053	0.695705	0.753732
Pcab061715	scaffold_569	373901	374707	+	K00021 hydroxymethylglutaryl-CoA reductase (NADPH) [EC:1.1.1.34] | (RefSeq) 3-hydroxy-3-methylglutaryl coenzyme A reductase 1-like (A)	down	up	FALSE	ko00900: Terpenoid backbone biosynthesis; ko01100: Metabolic pathways; ko01110: Biosynthesis of secondary metabolites	hydroxy-3-methylglutaryl-coenzyme A reductase 1 [Phlomis umbrosa]	HMDH1_ARATH RecName: Full=3-hydroxy-3-methylglutaryl-coenzyme A reductase 1 {ECO:0000303|PubMed:7588795, ECO:0000303|PubMed:8302869}; Short=AtHMGR1 {ECO:0000303|PubMed:7588795, ECO:0000303|PubMed:8302869}; Short=HMG-CoA reductase 1 {ECO:0000303|PubMed:7588795, ECO:0000303|PubMed:8302869}; EC=1.1.1.34 {ECO:0000255|PROSITE-ProRule:PRU10003};	A0A1P8D6U0_9LAMI RecName: Full=3-hydroxy-3-methylglutaryl coenzyme A reductase {ECO:0000256|RuleBase:RU361219}; Short=HMG-CoA reductase {ECO:0000256|RuleBase:RU361219}; EC=1.1.1.34 {ECO:0000256|RuleBase:RU361219};	3-hydroxy-3-methylglutaryl-CoA (HMG-CoA) reductase	GO:0005783,endoplasmic reticulum; GO:0005789,endoplasmic reticulum membrane; GO:0016021,integral component of membrane; GO:0005778,peroxisomal membrane; GO:0004420,hydroxymethylglutaryl-CoA reductase (NADPH) activity; GO:0015936,coenzyme A metabolic process; GO:0019287,isopentenyl diphosphate biosynthetic process, mevalonate pathway; GO:0008299,isoprenoid biosynthetic process; GO:0016126,sterol b…	PF00368.21:Hydroxymethylglutaryl-coenzyme A reductase	9.4094	7.9748	10.6595	7.7829	9.8616	7.4203	1.5253	0.9988	0.4891	0.333226	0.102412	0.187799	3.43129	3.45e-21	2.06e-20	-3.09416	7.81e-17	4.57e-16
Pcab061716	scaffold_569	374779	376624	+	K00021 hydroxymethylglutaryl-CoA reductase (NADPH) [EC:1.1.1.34] | (RefSeq) 3-hydroxy-3-methylglutaryl coenzyme A reductase 1-like (A)	down	up	FALSE	ko00900: Terpenoid backbone biosynthesis; ko01100: Metabolic pathways; ko01110: Biosynthesis of secondary metabolites	hydroxy-3-methylglutaryl-coenzyme A reductase 1 [Phlomis umbrosa]	HMGR1_PANGI RecName: Full=3-hydroxy-3-methylglutaryl coenzyme A reductase 1 {ECO:0000303|PubMed:24569845}; Short=HMG-CoA reductase 1 {ECO:0000303|PubMed:24569845}; Short=Hydroxymethylglutaryl-CoA reductase {ECO:0000255|PROSITE-ProRule:PRU10003}; Short=PgHMGR1 {ECO:0000303|PubMed:24569845}; EC=1.1.1.34 {ECO:0000255|PROSITE-ProRule:PRU10003};	A0A1P8D6U0_9LAMI RecName: Full=3-hydroxy-3-methylglutaryl coenzyme A reductase {ECO:0000256|RuleBase:RU361219}; Short=HMG-CoA reductase {ECO:0000256|RuleBase:RU361219}; EC=1.1.1.34 {ECO:0000256|RuleBase:RU361219};	3-hydroxy-3-methylglutaryl-CoA (HMG-CoA) reductase	GO:0031969,chloroplast membrane; GO:0005789,endoplasmic reticulum membrane; GO:0016021,integral component of membrane; GO:0005778,peroxisomal membrane; GO:0004420,hydroxymethylglutaryl-CoA reductase (NADPH) activity; GO:0015936,coenzyme A metabolic process; GO:0009646,response to absence of light; GO:0009753,response to jasmonic acid; GO:0016135,saponin biosynthetic process; GO:0016104,triterpeno…	PF00368.21:Hydroxymethylglutaryl-coenzyme A reductase	25.2773	24.1104	23.0639	21.415	23.0319	23.1427	2.5716	3.3598	3.0578	0.273027	0.00605514	0.0172046	3.19611	2.01e-76	3.59e-75	-2.91922	2.1e-63	3.73e-62
Pcab075375	scaffold_1288	133957	136200	+	K00021 hydroxymethylglutaryl-CoA reductase (NADPH) [EC:1.1.1.34] | (RefSeq) 3-hydroxy-3-methylglutaryl-coenzyme A reductase (A)	down	up	FALSE	ko00900: Terpenoid backbone biosynthesis; ko01100: Metabolic pathways; ko01110: Biosynthesis of secondary metabolites	HMG CoA reductase, partial [Pogostemon cablin]	HMDH_CAMAC RecName: Full=3-hydroxy-3-methylglutaryl-coenzyme A reductase; Short=HMG-CoA reductase; EC=1.1.1.34;	A0A2D0U5C6_POGCB RecName: Full=3-hydroxy-3-methylglutaryl coenzyme A reductase {ECO:0000256|RuleBase:RU361219}; Short=HMG-CoA reductase {ECO:0000256|RuleBase:RU361219}; EC=1.1.1.34 {ECO:0000256|RuleBase:RU361219}; Flags: Fragment;	3-hydroxy-3-methylglutaryl-CoA (HMG-CoA) reductase	GO:0005789,endoplasmic reticulum membrane; GO:0016021,integral component of membrane; GO:0004420,hydroxymethylglutaryl-CoA reductase (NADPH) activity; GO:0015936,coenzyme A metabolic process; GO:0008299,isoprenoid biosynthetic process; GO:0003674,molecular_function; GO:0003824,catalytic activity; GO:0016491,oxidoreductase activity; GO:0016614,oxidoreductase activity, acting on CH-OH group of dono…	PF00368.21:Hydroxymethylglutaryl-coenzyme A reductase	287.679	276.5	275.126	166.589	179.566	168.593	9.0206	8.3348	6.9265	0.877313	1.05e-86	8.35e-85	5.30806	0	0	-4.42663	0	0
Pcab084046	scaffold_966	20891	23210	+	K00021 hydroxymethylglutaryl-CoA reductase (NADPH) [EC:1.1.1.34] | (RefSeq) 3-hydroxy-3-methylglutaryl coenzyme A reductase 1-like (A)	down	up	FALSE	ko00900: Terpenoid backbone biosynthesis; ko01100: Metabolic pathways; ko01110: Biosynthesis of secondary metabolites	hydroxy-3-methylglutaryl-coenzyme A reductase 1 [Phlomis umbrosa]	HMGR1_PANGI RecName: Full=3-hydroxy-3-methylglutaryl coenzyme A reductase 1 {ECO:0000303|PubMed:24569845}; Short=HMG-CoA reductase 1 {ECO:0000303|PubMed:24569845}; Short=Hydroxymethylglutaryl-CoA reductase {ECO:0000255|PROSITE-ProRule:PRU10003}; Short=PgHMGR1 {ECO:0000303|PubMed:24569845}; EC=1.1.1.34 {ECO:0000255|PROSITE-ProRule:PRU10003};	A0A1P8D6U0_9LAMI RecName: Full=3-hydroxy-3-methylglutaryl coenzyme A reductase {ECO:0000256|RuleBase:RU361219}; Short=HMG-CoA reductase {ECO:0000256|RuleBase:RU361219}; EC=1.1.1.34 {ECO:0000256|RuleBase:RU361219};	3-hydroxy-3-methylglutaryl-CoA (HMG-CoA) reductase	GO:0031969,chloroplast membrane; GO:0005789,endoplasmic reticulum membrane; GO:0016021,integral component of membrane; GO:0005778,peroxisomal membrane; GO:0004420,hydroxymethylglutaryl-CoA reductase (NADPH) activity; GO:0015936,coenzyme A metabolic process; GO:0009646,response to absence of light; GO:0009753,response to jasmonic acid; GO:0016135,saponin biosynthetic process; GO:0016104,triterpeno…	PF00368.21:Hydroxymethylglutaryl-coenzyme A reductase	20.6099	20.0097	21.2906	24.6234	23.3367	24.7109	4.107	4.3527	3.4144	-0.0595104	0.49026	0.622454	2.57469	6.67e-72	1.12e-70	-2.62981	5.61e-81	1.29e-79
Pcab096552	scaffold_1742	102512	104950	-	K00021 hydroxymethylglutaryl-CoA reductase (NADPH) [EC:1.1.1.34] | (RefSeq) 3-hydroxy-3-methylglutaryl coenzyme A reductase 1-like (A)	down	up	FALSE	ko00900: Terpenoid backbone biosynthesis; ko01100: Metabolic pathways; ko01110: Biosynthesis of secondary metabolites	hydroxy-3-methylglutaryl-coenzyme A reductase 1 [Phlomis umbrosa]	HMGR1_PANGI RecName: Full=3-hydroxy-3-methylglutaryl coenzyme A reductase 1 {ECO:0000303|PubMed:24569845}; Short=HMG-CoA reductase 1 {ECO:0000303|PubMed:24569845}; Short=Hydroxymethylglutaryl-CoA reductase {ECO:0000255|PROSITE-ProRule:PRU10003}; Short=PgHMGR1 {ECO:0000303|PubMed:24569845}; EC=1.1.1.34 {ECO:0000255|PROSITE-ProRule:PRU10003};	A0A1P8D6U0_9LAMI RecName: Full=3-hydroxy-3-methylglutaryl coenzyme A reductase {ECO:0000256|RuleBase:RU361219}; Short=HMG-CoA reductase {ECO:0000256|RuleBase:RU361219}; EC=1.1.1.34 {ECO:0000256|RuleBase:RU361219};	3-hydroxy-3-methylglutaryl-CoA (HMG-CoA) reductase	GO:0031969,chloroplast membrane; GO:0005789,endoplasmic reticulum membrane; GO:0016021,integral component of membrane; GO:0005778,peroxisomal membrane; GO:0004420,hydroxymethylglutaryl-CoA reductase (NADPH) activity; GO:0015936,coenzyme A metabolic process; GO:0009646,response to absence of light; GO:0009753,response to jasmonic acid; GO:0016135,saponin biosynthetic process; GO:0016104,triterpeno…	PF00368.21:Hydroxymethylglutaryl-coenzyme A reductase	15.1232	15.5619	14.8301	12.3067	13.3364	13.9435	2.5511	2.2838	3.2238	0.374051	0.000323155	0.00124547	2.69175	2.91e-59	4.05e-58	-2.31373	2.16e-41	2.6e-40
Pcab098418	scaffold_515	78851	80609	+	K00021 hydroxymethylglutaryl-CoA reductase (NADPH) [EC:1.1.1.34] | (RefSeq) 3-hydroxy-3-methylglutaryl-coenzyme A reductase (A)	down	up	FALSE	ko00900: Terpenoid backbone biosynthesis; ko01100: Metabolic pathways; ko01110: Biosynthesis of secondary metabolites	HMG CoA reductase, partial [Pogostemon cablin]	HMDH_CAMAC RecName: Full=3-hydroxy-3-methylglutaryl-coenzyme A reductase; Short=HMG-CoA reductase; EC=1.1.1.34;	A0A2D0U5C6_POGCB RecName: Full=3-hydroxy-3-methylglutaryl coenzyme A reductase {ECO:0000256|RuleBase:RU361219}; Short=HMG-CoA reductase {ECO:0000256|RuleBase:RU361219}; EC=1.1.1.34 {ECO:0000256|RuleBase:RU361219}; Flags: Fragment;	3-hydroxy-3-methylglutaryl-CoA (HMG-CoA) reductase	GO:0005789,endoplasmic reticulum membrane; GO:0016021,integral component of membrane; GO:0004420,hydroxymethylglutaryl-CoA reductase (NADPH) activity; GO:0015936,coenzyme A metabolic process; GO:0008299,isoprenoid biosynthetic process; GO:0003674,molecular_function; GO:0003824,catalytic activity; GO:0016491,oxidoreductase activity; GO:0016614,oxidoreductase activity, acting on CH-OH group of dono…	PF00368.21:Hydroxymethylglutaryl-coenzyme A reductase	66.6784	65.5812	61.8284	39.0852	37.5754	40.4756	1.0467	1.3085	1.5976	0.900929	5.88e-44	2.08e-42	5.80178	1.83e-235	1.28e-233	-4.89683	1.05e-157	5.08e-156
Pcab105270	scaffold_768	73931	76484	-	K00021 hydroxymethylglutaryl-CoA reductase (NADPH) [EC:1.1.1.34] | (RefSeq) 3-hydroxy-3-methylglutaryl-coenzyme A reductase (A)	down	up	up	ko00900: Terpenoid backbone biosynthesis; ko01100: Metabolic pathways; ko01110: Biosynthesis of secondary metabolites	HMG CoA reductase, partial [Pogostemon cablin]	HMDH_CAMAC RecName: Full=3-hydroxy-3-methylglutaryl-coenzyme A reductase; Short=HMG-CoA reductase; EC=1.1.1.34;	A0A2D0U5C6_POGCB RecName: Full=3-hydroxy-3-methylglutaryl coenzyme A reductase {ECO:0000256|RuleBase:RU361219}; Short=HMG-CoA reductase {ECO:0000256|RuleBase:RU361219}; EC=1.1.1.34 {ECO:0000256|RuleBase:RU361219}; Flags: Fragment;	3-hydroxy-3-methylglutaryl-CoA (HMG-CoA) reductase	GO:0005789,endoplasmic reticulum membrane; GO:0016021,integral component of membrane; GO:0004420,hydroxymethylglutaryl-CoA reductase (NADPH) activity; GO:0015936,coenzyme A metabolic process; GO:0008299,isoprenoid biosynthetic process; GO:0003674,molecular_function; GO:0003824,catalytic activity; GO:0016491,oxidoreductase activity; GO:0016614,oxidoreductase activity, acting on CH-OH group of dono…	PF00368.21:Hydroxymethylglutaryl-coenzyme A reductase	27.1589	28.032	25.2456	2.9882	4.1541	4.6768	1.0194	0.4248	0.572	2.94282	3.67e-93	3.23e-91	5.54761	2.6e-90	5.6e-89	-2.5926	9.64e-12	4.33e-11
Pcab128212	scaffold_3617	48758	50921	-	K00021 hydroxymethylglutaryl-CoA reductase (NADPH) [EC:1.1.1.34] | (RefSeq) 3-hydroxy-3-methylglutaryl-coenzyme A reductase (A)	down	up	FALSE	ko00900: Terpenoid backbone biosynthesis; ko01100: Metabolic pathways; ko01110: Biosynthesis of secondary metabolites	HMG CoA reductase, partial [Pogostemon cablin]	HMDH_CAMAC RecName: Full=3-hydroxy-3-methylglutaryl-coenzyme A reductase; Short=HMG-CoA reductase; EC=1.1.1.34;	A0A2D0U5C6_POGCB RecName: Full=3-hydroxy-3-methylglutaryl coenzyme A reductase {ECO:0000256|RuleBase:RU361219}; Short=HMG-CoA reductase {ECO:0000256|RuleBase:RU361219}; EC=1.1.1.34 {ECO:0000256|RuleBase:RU361219}; Flags: Fragment;	3-hydroxy-3-methylglutaryl-CoA (HMG-CoA) reductase	GO:0005789,endoplasmic reticulum membrane; GO:0016021,integral component of membrane; GO:0004420,hydroxymethylglutaryl-CoA reductase (NADPH) activity; GO:0015936,coenzyme A metabolic process; GO:0008299,isoprenoid biosynthetic process; GO:0003674,molecular_function; GO:0003824,catalytic activity; GO:0016491,oxidoreductase activity; GO:0016614,oxidoreductase activity, acting on CH-OH group of dono…	PF00368.21:Hydroxymethylglutaryl-coenzyme A reductase	228.377	230.508	226.172	145.642	157.66	148.628	8.8345	7.5048	7.9321	0.772007	1.14e-69	6.92e-68	5.01708	0	0	-4.24071	0	0
Pcab137575	scaffold_2045	4854	5816	-	K00021 hydroxymethylglutaryl-CoA reductase (NADPH) [EC:1.1.1.34] | (RefSeq) 3-hydroxy-3-methylglutaryl-coenzyme A reductase (A)	down	up	up	ko00900: Terpenoid backbone biosynthesis; ko01100: Metabolic pathways; ko01110: Biosynthesis of secondary metabolites	HMG CoA reductase, partial [Pogostemon cablin]	HMDH_CAMAC RecName: Full=3-hydroxy-3-methylglutaryl-coenzyme A reductase; Short=HMG-CoA reductase; EC=1.1.1.34;	A0A2D0U5C6_POGCB RecName: Full=3-hydroxy-3-methylglutaryl coenzyme A reductase {ECO:0000256|RuleBase:RU361219}; Short=HMG-CoA reductase {ECO:0000256|RuleBase:RU361219}; EC=1.1.1.34 {ECO:0000256|RuleBase:RU361219}; Flags: Fragment;	3-hydroxy-3-methylglutaryl-CoA (HMG-CoA) reductase	GO:0005789,endoplasmic reticulum membrane; GO:0016021,integral component of membrane; GO:0004420,hydroxymethylglutaryl-CoA reductase (NADPH) activity; GO:0015936,coenzyme A metabolic process; GO:0008299,isoprenoid biosynthetic process; GO:0003674,molecular_function; GO:0003824,catalytic activity; GO:0016491,oxidoreductase activity; GO:0016614,oxidoreductase activity, acting on CH-OH group of dono…	PF00368.21:Hydroxymethylglutaryl-coenzyme A reductase	20.4724	13.9471	18.6843	2.7011	3.1515	2.5564	0	0.0761	0.082	2.83181	1.12e-41	3.7e-40	8.52185	2.21e-16	1.09e-15	-5.68944	2.13e-07	6.86e-07
3-hydroxy-3-methyl-glutaryl-CoA	EC:2.3.3.10 hydroxymethylglutaryl-CoA synthase
Pcab009812	scaffold_8	728675	733733	-	K01641 hydroxymethylglutaryl-CoA synthase [EC:2.3.3.10] | (RefSeq) hydroxymethylglutaryl-CoA synthase (A)	down	up	up	ko00280: Valine, leucine and isoleucine degradation; ko00650: Butanoate metabolism; ko00900: Terpenoid backbone biosynthesis; ko01100: Metabolic pathways; ko01110: Biosynthesis of secondary metabolites	hydroxymethylglutaryl-CoA synthase / HMG-CoA synthase / 3-hydroxy-3-methylglutaryl coenzyme A synthase [Perilla frutescens var. frutescens]	HMCS_ARATH RecName: Full=Hydroxymethylglutaryl-CoA synthase; Short=HMG-CoA synthase; EC=2.3.3.10; AltName: Full=3-hydroxy-3-methylglutaryl coenzyme A synthase; AltName: Full=Protein EMBRYO DEFECTIVE 2778; AltName: Full=Protein FLAKY POLLEN 1;	A0A6B7LPC3_9LAMI RecName: Full=Hydroxymethylglutaryl-CoA synthase {ECO:0000256|RuleBase:RU364071}; Short=HMG-CoA synthase {ECO:0000256|RuleBase:RU364071}; EC=2.3.3.10 {ECO:0000256|RuleBase:RU364071}; AltName: Full=3-hydroxy-3-methylglutaryl coenzyme A synthase {ECO:0000256|RuleBase:RU364071};	Hydroxymethylglutaryl-CoA synthase	GO:0009506,plasmodesma; GO:0004421,hydroxymethylglutaryl-CoA synthase activity; GO:0006084,acetyl-CoA metabolic process; GO:0010142,farnesyl diphosphate biosynthetic process, mevalonate pathway; GO:0019287,isopentenyl diphosphate biosynthetic process, mevalonate pathway; GO:0016126,sterol biosynthetic process; GO:0003674,molecular_function; GO:0003824,catalytic activity; GO:0016740,transferase ac…	PF08540.13:Hydroxymethylglutaryl-coenzyme A synthase C terminal	232.264	232.128	238.458	96.9187	93.813	95.6174	41.7191	39.0631	40.6687	1.46716	1.18e-275	5.95e-273	2.7268	0	0	-1.25532	4.57e-81	1.06e-79
Pcab018557	scaffold_111	2669250	2673687	-	K01641 hydroxymethylglutaryl-CoA synthase [EC:2.3.3.10] | (RefSeq) hydroxymethylglutaryl-CoA synthase (A)	down	up	up	ko00280: Valine, leucine and isoleucine degradation; ko00650: Butanoate metabolism; ko00900: Terpenoid backbone biosynthesis; ko01100: Metabolic pathways; ko01110: Biosynthesis of secondary metabolites	hypothetical protein Pfo_010308 [Paulownia fortunei]	HMCS_ARATH RecName: Full=Hydroxymethylglutaryl-CoA synthase; Short=HMG-CoA synthase; EC=2.3.3.10; AltName: Full=3-hydroxy-3-methylglutaryl coenzyme A synthase; AltName: Full=Protein EMBRYO DEFECTIVE 2778; AltName: Full=Protein FLAKY POLLEN 1;	A0A2G9GUM8_9LAMI RecName: Full=Hydroxymethylglutaryl-CoA synthase {ECO:0000256|RuleBase:RU364071}; Short=HMG-CoA synthase {ECO:0000256|RuleBase:RU364071}; EC=2.3.3.10 {ECO:0000256|RuleBase:RU364071}; AltName: Full=3-hydroxy-3-methylglutaryl coenzyme A synthase {ECO:0000256|RuleBase:RU364071};	Hydroxymethylglutaryl-CoA synthase	GO:0009506,plasmodesma; GO:0004421,hydroxymethylglutaryl-CoA synthase activity; GO:0006084,acetyl-CoA metabolic process; GO:0010142,farnesyl diphosphate biosynthetic process, mevalonate pathway; GO:0019287,isopentenyl diphosphate biosynthetic process, mevalonate pathway; GO:0016126,sterol biosynthetic process; GO:0003674,molecular_function; GO:0003824,catalytic activity; GO:0016740,transferase ac…	PF08540.13:Hydroxymethylglutaryl-coenzyme A synthase C terminal	140.808	140.135	138.646	48.6878	48.0843	49.9739	7.5182	8.0622	7.3093	1.68775	1.15e-254	5.22e-252	4.38733	0	0	-2.69581	1.07e-161	5.38e-160
Pcab083640	scaffold_643	86144	90610	+	K01641 hydroxymethylglutaryl-CoA synthase [EC:2.3.3.10] | (RefSeq) hydroxymethylglutaryl-CoA synthase (A)	down	up	up	ko00280: Valine, leucine and isoleucine degradation; ko00650: Butanoate metabolism; ko00900: Terpenoid backbone biosynthesis; ko01100: Metabolic pathways; ko01110: Biosynthesis of secondary metabolites	hypothetical protein Pfo_010308 [Paulownia fortunei]	HMCS_ARATH RecName: Full=Hydroxymethylglutaryl-CoA synthase; Short=HMG-CoA synthase; EC=2.3.3.10; AltName: Full=3-hydroxy-3-methylglutaryl coenzyme A synthase; AltName: Full=Protein EMBRYO DEFECTIVE 2778; AltName: Full=Protein FLAKY POLLEN 1;	A0A2G9GUM8_9LAMI RecName: Full=Hydroxymethylglutaryl-CoA synthase {ECO:0000256|RuleBase:RU364071}; Short=HMG-CoA synthase {ECO:0000256|RuleBase:RU364071}; EC=2.3.3.10 {ECO:0000256|RuleBase:RU364071}; AltName: Full=3-hydroxy-3-methylglutaryl coenzyme A synthase {ECO:0000256|RuleBase:RU364071};	Hydroxymethylglutaryl-CoA synthase	GO:0009506,plasmodesma; GO:0004421,hydroxymethylglutaryl-CoA synthase activity; GO:0006084,acetyl-CoA metabolic process; GO:0010142,farnesyl diphosphate biosynthetic process, mevalonate pathway; GO:0019287,isopentenyl diphosphate biosynthetic process, mevalonate pathway; GO:0016126,sterol biosynthetic process; GO:0003674,molecular_function; GO:0003824,catalytic activity; GO:0016740,transferase ac…	PF08540.13:Hydroxymethylglutaryl-coenzyme A synthase C terminal	211.458	204.716	207.715	81.5494	80.2263	75.9213	11.5886	12.3328	10.319	1.56385	1.16e-241	4.81e-239	4.37956	0	0	-2.81193	1.5e-220	1.13e-218
acetyl-CoA	acetoacetyl-CoA	EC:2.3.1.9 acetyl-CoA C-acetyltransferase
Pcab050982	scaffold_628	281922	286229	+	K00626 acetyl-CoA C-acetyltransferase [EC:2.3.1.9] | (RefSeq) acetyl-CoA acetyltransferase, cytosolic 1 (A)	down	up	up	ko00071: Fatty acid degradation; ko00280: Valine, leucine and isoleucine degradation; ko00310: Lysine degradation; ko00380: Tryptophan metabolism; ko00620: Pyruvate metabolism; ko00630: Glyoxylate and dicarboxylate metabolism; ko00650: Butanoate metabolism; ko00900: Terpenoid backbone biosynthesis; ko01100: Metabolic pathways; ko01110: Biosynthesis of secondary metabolites; ko01200: Carbon metabo…	acetyl-coa acetyltransferase cytosolic 1 [Phtheirospermum japonicum]	THIC1_ARATH RecName: Full=Acetyl-CoA acetyltransferase, cytosolic 1; EC=2.3.1.9; AltName: Full=Cytosolic acetoacetyl-CoA thiolase 1; Short=Thiolase 1; AltName: Full=Protein EMBRYO DEFECTIVE 1276;	A0A830CV32_9LAMI SubName: Full=Acetyl-coa acetyltransferase cytosolic 1 {ECO:0000313|EMBL:GFQ03017.1};	Acetyl-CoA acetyltransferase	GO:0005777,peroxisome; GO:0005886,plasma membrane; GO:0009536,plastid; GO:0003985,acetyl-CoA C-acetyltransferase activity; GO:0046872,metal ion binding; GO:0006635,fatty acid beta-oxidation; GO:0008299,isoprenoid biosynthetic process; GO:0009846,pollen germination; GO:0009860,pollen tube growth; GO:0016125,sterol metabolic process; GO:0003674,molecular_function; GO:0003824,catalytic activity; GO:…	PF00108.26:Thiolase, N-terminal domain	79.0013	75.0518	71.3751	31.3099	26.8272	29.4251	10.5352	9.3691	9.9467	1.53619	5.26e-100	5.2e-98	3.1132	1.5e-229	1e-227	-1.57193	3.22e-43	4.05e-42
Pcab058211	scaffold_1166	254985	260003	-	K00626 acetyl-CoA C-acetyltransferase [EC:2.3.1.9] | (RefSeq) acetyl-CoA acetyltransferase, cytosolic 1 (A)	down	up	up	ko00071: Fatty acid degradation; ko00280: Valine, leucine and isoleucine degradation; ko00310: Lysine degradation; ko00380: Tryptophan metabolism; ko00620: Pyruvate metabolism; ko00630: Glyoxylate and dicarboxylate metabolism; ko00650: Butanoate metabolism; ko00900: Terpenoid backbone biosynthesis; ko01100: Metabolic pathways; ko01110: Biosynthesis of secondary metabolites; ko01200: Carbon metabo…	hypothetical protein Pfo_014370 [Paulownia fortunei]	THIC1_ARATH RecName: Full=Acetyl-CoA acetyltransferase, cytosolic 1; EC=2.3.1.9; AltName: Full=Cytosolic acetoacetyl-CoA thiolase 1; Short=Thiolase 1; AltName: Full=Protein EMBRYO DEFECTIVE 1276;	A0A6I9UJG1_SESIN SubName: Full=acetyl-CoA acetyltransferase, cytosolic 1 {ECO:0000313|RefSeq:XP_011100512.1};	Acetyl-CoA acetyltransferase	GO:0005777,peroxisome; GO:0005886,plasma membrane; GO:0009536,plastid; GO:0003985,acetyl-CoA C-acetyltransferase activity; GO:0046872,metal ion binding; GO:0006635,fatty acid beta-oxidation; GO:0008299,isoprenoid biosynthetic process; GO:0009846,pollen germination; GO:0009860,pollen tube growth; GO:0016125,sterol metabolic process; GO:0003674,molecular_function; GO:0003824,catalytic activity; GO:…	PF00108.26:Thiolase, N-terminal domain	213.099	217.919	213.926	97.7052	94.1531	89.5022	19.0717	21.37	21.2804	1.36828	4.04e-205	1.34e-202	3.57566	0	0	-2.20368	1.68e-185	1.01e-183
Pcab069204	scaffold_1056	245853	251164	+	K00626 acetyl-CoA C-acetyltransferase [EC:2.3.1.9] | (RefSeq) acetyl-CoA acetyltransferase, cytosolic 1 (A)	down	up	FALSE	ko00071: Fatty acid degradation; ko00280: Valine, leucine and isoleucine degradation; ko00310: Lysine degradation; ko00380: Tryptophan metabolism; ko00620: Pyruvate metabolism; ko00630: Glyoxylate and dicarboxylate metabolism; ko00650: Butanoate metabolism; ko00900: Terpenoid backbone biosynthesis; ko01100: Metabolic pathways; ko01110: Biosynthesis of secondary metabolites; ko01200: Carbon metabo…	hypothetical protein Pfo_014370 [Paulownia fortunei]	THIC1_ARATH RecName: Full=Acetyl-CoA acetyltransferase, cytosolic 1; EC=2.3.1.9; AltName: Full=Cytosolic acetoacetyl-CoA thiolase 1; Short=Thiolase 1; AltName: Full=Protein EMBRYO DEFECTIVE 1276;	A0A6I9UJG1_SESIN SubName: Full=acetyl-CoA acetyltransferase, cytosolic 1 {ECO:0000313|RefSeq:XP_011100512.1};	Acetyl-CoA acetyltransferase	GO:0005777,peroxisome; GO:0005886,plasma membrane; GO:0009536,plastid; GO:0003985,acetyl-CoA C-acetyltransferase activity; GO:0046872,metal ion binding; GO:0006635,fatty acid beta-oxidation; GO:0008299,isoprenoid biosynthetic process; GO:0009846,pollen germination; GO:0009860,pollen tube growth; GO:0016125,sterol metabolic process; GO:0003674,molecular_function; GO:0003824,catalytic activity; GO:…	PF00108.26:Thiolase, N-terminal domain	262.099	265.33	254.374	176.222	168.818	159.526	25.2838	27.3079	24.8954	0.803443	2.13e-66	1.24e-64	3.52656	0	0	-2.71926	0	0
1-hydroxy-2-methyl-2-butenyl 4-diphosphate	EC:1.17.7.1 1.17.7.3 (E)-4-hydroxy-3-methylbut-2-enyl-diphosphate synthase
Pcab016615	scaffold_64	2604329	2610372	-	K03526 (E)-4-hydroxy-3-methylbut-2-enyl-diphosphate synthase [EC:1.17.7.1 1.17.7.3] | (RefSeq) 4-hydroxy-3-methylbut-2-en-1-yl diphosphate synthase (ferredoxin), chloroplastic (A)	up	down	FALSE	ko00900: Terpenoid backbone biosynthesis; ko01100: Metabolic pathways; ko01110: Biosynthesis of secondary metabolites	4-hydroxy-3-methylbut-2-enyl diphosphate synthase [Perilla frutescens var. hirtella]	ISPG_ARATH RecName: Full=4-hydroxy-3-methylbut-2-en-1-yl diphosphate synthase (ferredoxin), chloroplastic; EC=1.17.7.1 {ECO:0000269|PubMed:15650872}; AltName: Full=1-hydroxy-2-methyl-2-(E)-butenyl 4-diphosphate synthase; AltName: Full=Protein CHLOROPLAST BIOGENESIS 4; AltName: Full=Protein CONSTITUTIVE SUBTILISIN 3; Flags: Precursor;	A0A5C1WQ70_9LAMI SubName: Full=1-Hydroxy-2-methyl-2-butenyl 4-diphosphate synthase {ECO:0000313|EMBL:QEN91946.1};	--	GO:0009507,chloroplast; GO:0009941,chloroplast envelope; GO:0009570,chloroplast stroma; GO:0009536,plastid; GO:0051539,4 iron, 4 sulfur cluster binding; GO:0046429,4-hydroxy-3-methylbut-2-en-1-yl diphosphate synthase activity; GO:0005506,iron ion binding; GO:0019288,isopentenyl diphosphate biosynthetic process, methylerythritol 4-phosphate pathway; GO:0009617,response to bacterium; GO:0009862,sys…	PF04551.17:GcpE protein	5.837	4.3125	4.3704	10.0912	9.1654	9.45	60.1305	57.3546	58.5329	-0.810217	7.61e-10	6.23e-09	-3.40469	1.15e-257	9.28e-256	2.59826	1.72e-252	1.64e-250
Pcab055048	scaffold_429_1_833693	342378	347479	-	K03526 (E)-4-hydroxy-3-methylbut-2-enyl-diphosphate synthase [EC:1.17.7.1 1.17.7.3] | (RefSeq) 4-hydroxy-3-methylbut-2-en-1-yl diphosphate synthase (ferredoxin), chloroplastic (A)	up	down	FALSE	ko00900: Terpenoid backbone biosynthesis; ko01100: Metabolic pathways; ko01110: Biosynthesis of secondary metabolites	1-Hydroxy-2-methyl-2-butenyl 4-diphosphate synthase [Phlomis umbrosa]	ISPG_ARATH RecName: Full=4-hydroxy-3-methylbut-2-en-1-yl diphosphate synthase (ferredoxin), chloroplastic; EC=1.17.7.1 {ECO:0000269|PubMed:15650872}; AltName: Full=1-hydroxy-2-methyl-2-(E)-butenyl 4-diphosphate synthase; AltName: Full=Protein CHLOROPLAST BIOGENESIS 4; AltName: Full=Protein CONSTITUTIVE SUBTILISIN 3; Flags: Precursor;	A0A5C1WQ70_9LAMI SubName: Full=1-Hydroxy-2-methyl-2-butenyl 4-diphosphate synthase {ECO:0000313|EMBL:QEN91946.1};	--	GO:0009507,chloroplast; GO:0009941,chloroplast envelope; GO:0009570,chloroplast stroma; GO:0009536,plastid; GO:0051539,4 iron, 4 sulfur cluster binding; GO:0046429,4-hydroxy-3-methylbut-2-en-1-yl diphosphate synthase activity; GO:0005506,iron ion binding; GO:0019288,isopentenyl diphosphate biosynthetic process, methylerythritol 4-phosphate pathway; GO:0009617,response to bacterium; GO:0009862,sys…	PF04551.17:GcpE protein	2.7727	2.819	2.4608	5.8077	3.8587	4.3364	28.7818	25.0458	27.7665	-0.626945	0.00270237	0.00844187	-3.14608	1.47e-109	3.88e-108	2.52215	7.22e-80	1.64e-78
Pcab103028	scaffold_1749	135207	141350	-	K03526 (E)-4-hydroxy-3-methylbut-2-enyl-diphosphate synthase [EC:1.17.7.1 1.17.7.3] | (RefSeq) 4-hydroxy-3-methylbut-2-en-1-yl diphosphate synthase (ferredoxin), chloroplastic (A)	up	down	FALSE	ko00900: Terpenoid backbone biosynthesis; ko01100: Metabolic pathways; ko01110: Biosynthesis of secondary metabolites	1-Hydroxy-2-methyl-2-butenyl 4-diphosphate synthase [Phlomis umbrosa]	ISPG_ARATH RecName: Full=4-hydroxy-3-methylbut-2-en-1-yl diphosphate synthase (ferredoxin), chloroplastic; EC=1.17.7.1 {ECO:0000269|PubMed:15650872}; AltName: Full=1-hydroxy-2-methyl-2-(E)-butenyl 4-diphosphate synthase; AltName: Full=Protein CHLOROPLAST BIOGENESIS 4; AltName: Full=Protein CONSTITUTIVE SUBTILISIN 3; Flags: Precursor;	A0A5C1WQ70_9LAMI SubName: Full=1-Hydroxy-2-methyl-2-butenyl 4-diphosphate synthase {ECO:0000313|EMBL:QEN91946.1};	--	GO:0009507,chloroplast; GO:0009941,chloroplast envelope; GO:0009570,chloroplast stroma; GO:0009536,plastid; GO:0051539,4 iron, 4 sulfur cluster binding; GO:0046429,4-hydroxy-3-methylbut-2-en-1-yl diphosphate synthase activity; GO:0005506,iron ion binding; GO:0019288,isopentenyl diphosphate biosynthetic process, methylerythritol 4-phosphate pathway; GO:0009617,response to bacterium; GO:0009862,sys…	PF04551.17:GcpE protein	5.218	4.5592	4.3699	9.5452	8.5288	9.4496	66.3391	61.9443	65.7834	-0.78737	8.72e-11	7.79e-10	-3.58365	0	0	2.80014	4.62e-290	5.37e-288
Pcab133085	scaffold_4221	25511	31906	-	K03526 (E)-4-hydroxy-3-methylbut-2-enyl-diphosphate synthase [EC:1.17.7.1 1.17.7.3] | (RefSeq) 4-hydroxy-3-methylbut-2-en-1-yl diphosphate synthase (ferredoxin), chloroplastic (A)	up	down	down	ko00900: Terpenoid backbone biosynthesis; ko01100: Metabolic pathways; ko01110: Biosynthesis of secondary metabolites	4-hydroxy-3-methylbut-2-enyl diphosphate synthase [Perilla frutescens var. hirtella]	ISPG_ARATH RecName: Full=4-hydroxy-3-methylbut-2-en-1-yl diphosphate synthase (ferredoxin), chloroplastic; EC=1.17.7.1 {ECO:0000269|PubMed:15650872}; AltName: Full=1-hydroxy-2-methyl-2-(E)-butenyl 4-diphosphate synthase; AltName: Full=Protein CHLOROPLAST BIOGENESIS 4; AltName: Full=Protein CONSTITUTIVE SUBTILISIN 3; Flags: Precursor;	A0A5C1WQ70_9LAMI SubName: Full=1-Hydroxy-2-methyl-2-butenyl 4-diphosphate synthase {ECO:0000313|EMBL:QEN91946.1};	--	GO:0009507,chloroplast; GO:0009941,chloroplast envelope; GO:0009570,chloroplast stroma; GO:0009536,plastid; GO:0051539,4 iron, 4 sulfur cluster binding; GO:0046429,4-hydroxy-3-methylbut-2-en-1-yl diphosphate synthase activity; GO:0005506,iron ion binding; GO:0019288,isopentenyl diphosphate biosynthetic process, methylerythritol 4-phosphate pathway; GO:0009617,response to bacterium; GO:0009862,sys…	PF04551.17:GcpE protein	2.7365	3.4112	3.0344	9.0878	7.9936	8.1564	40.0746	41.8626	44.8298	-1.28753	1.91e-20	3.05e-19	-3.5953	3.06e-232	2.1e-230	2.31161	5.69e-149	2.57e-147
2-C-methyl-D-erythritol 2,4-cyclodiphosphate	EC:4.6.1.12 2-C-methyl-D-erythritol 2,4-cyclodiphosphate synthase
Pcab016087	scaffold_54	1088742	1090810	+	K01770 2-C-methyl-D-erythritol 2,4-cyclodiphosphate synthase [EC:4.6.1.12] | (RefSeq) 2-C-methyl-D-erythritol 2,4-cyclodiphosphate synthase, chloroplastic-like (A)	up	down	FALSE	ko00900: Terpenoid backbone biosynthesis; ko01100: Metabolic pathways; ko01110: Biosynthesis of secondary metabolites	2-C-methyl-D-erythritol 2,4-cyclodiphosphate synthase, partial [Pogostemon cablin]	ISPF_CATRO RecName: Full=2-C-methyl-D-erythritol 2,4-cyclodiphosphate synthase, chloroplastic {ECO:0000305}; Short=MECDP-synthase {ECO:0000305}; Short=MECPS {ECO:0000305}; EC=4.6.1.12 {ECO:0000250|UniProtKB:Q9CAK8}; Flags: Precursor;	A0A2D0U5W9_POGCB RecName: Full=2-C-methyl-D-erythritol 2,4-cyclodiphosphate synthase {ECO:0000256|ARBA:ARBA00012579, ECO:0000256|RuleBase:RU004395}; EC=4.6.1.12 {ECO:0000256|ARBA:ARBA00012579, ECO:0000256|RuleBase:RU004395}; Flags: Fragment;	--	GO:0009570,chloroplast stroma; GO:0008685,2-C-methyl-D-erythritol 2,4-cyclodiphosphate synthase activity; GO:0046872,metal ion binding; GO:0019288,isopentenyl diphosphate biosynthetic process, methylerythritol 4-phosphate pathway; GO:0016114,terpenoid biosynthetic process; GO:0003674,molecular_function; GO:0003824,catalytic activity; GO:0016829,lyase activity; GO:0016849,phosphorus-oxygen lyase a…	PF02542.19:YgbB family	7.061	5.0437	5.1685	4.1765	5.4264	5.7706	33.4408	34.3037	32.5824	0.343237	0.151832	0.257398	-2.34336	1.05e-48	1.23e-47	2.69207	3.59e-67	6.75e-66
Pcab021242	scaffold_38	1078101	1080677	-	K01770 2-C-methyl-D-erythritol 2,4-cyclodiphosphate synthase [EC:4.6.1.12] | (RefSeq) 2-C-methyl-D-erythritol 2,4-cyclodiphosphate synthase, chloroplastic (A)	up	down	NA	ko00900: Terpenoid backbone biosynthesis; ko01100: Metabolic pathways; ko01110: Biosynthesis of secondary metabolites	hypothetical protein Pfo_025350 [Paulownia fortunei]	ISPF_CATRO RecName: Full=2-C-methyl-D-erythritol 2,4-cyclodiphosphate synthase, chloroplastic {ECO:0000305}; Short=MECDP-synthase {ECO:0000305}; Short=MECPS {ECO:0000305}; EC=4.6.1.12 {ECO:0000250|UniProtKB:Q9CAK8}; Flags: Precursor;	A0A6I9TDP1_SESIN RecName: Full=2-C-methyl-D-erythritol 2,4-cyclodiphosphate synthase {ECO:0000256|ARBA:ARBA00012579, ECO:0000256|RuleBase:RU004395}; EC=4.6.1.12 {ECO:0000256|ARBA:ARBA00012579, ECO:0000256|RuleBase:RU004395};	--	GO:0009570,chloroplast stroma; GO:0008685,2-C-methyl-D-erythritol 2,4-cyclodiphosphate synthase activity; GO:0046872,metal ion binding; GO:0019288,isopentenyl diphosphate biosynthetic process, methylerythritol 4-phosphate pathway; GO:0016114,terpenoid biosynthetic process; GO:0003674,molecular_function; GO:0003824,catalytic activity; GO:0016829,lyase activity; GO:0016849,phosphorus-oxygen lyase a…	PF02542.19:YgbB family	0	0	0	0	0	0	1.9026	2.0865	2.967	NA	NA	NA	-7.10637	3.17e-08	9.44e-08	7.38086	6.95e-09	2.55e-08
Pcab032965	scaffold_91	747795	749711	-	K01770 2-C-methyl-D-erythritol 2,4-cyclodiphosphate synthase [EC:4.6.1.12] | (RefSeq) 2-C-methyl-D-erythritol 2,4-cyclodiphosphate synthase, chloroplastic-like (A)	FALSE	down	FALSE	ko00900: Terpenoid backbone biosynthesis; ko01100: Metabolic pathways; ko01110: Biosynthesis of secondary metabolites	2-C-methyl-D-erythritol 2,4-cyclodiphosphate synthase, partial [Pogostemon cablin]	ISPF_CATRO RecName: Full=2-C-methyl-D-erythritol 2,4-cyclodiphosphate synthase, chloroplastic {ECO:0000305}; Short=MECDP-synthase {ECO:0000305}; Short=MECPS {ECO:0000305}; EC=4.6.1.12 {ECO:0000250|UniProtKB:Q9CAK8}; Flags: Precursor;	A0A2D0U5W9_POGCB RecName: Full=2-C-methyl-D-erythritol 2,4-cyclodiphosphate synthase {ECO:0000256|ARBA:ARBA00012579, ECO:0000256|RuleBase:RU004395}; EC=4.6.1.12 {ECO:0000256|ARBA:ARBA00012579, ECO:0000256|RuleBase:RU004395}; Flags: Fragment;	--	GO:0009570,chloroplast stroma; GO:0008685,2-C-methyl-D-erythritol 2,4-cyclodiphosphate synthase activity; GO:0046872,metal ion binding; GO:0019288,isopentenyl diphosphate biosynthetic process, methylerythritol 4-phosphate pathway; GO:0016114,terpenoid biosynthetic process; GO:0003674,molecular_function; GO:0003824,catalytic activity; GO:0016829,lyase activity; GO:0016849,phosphorus-oxygen lyase a…	PF02542.19:YgbB family	6.4584	7.0682	4.9283	7.9303	7.1658	9.0793	13.188	14.5793	16.6925	-0.21558	0.301906	0.43667	-1.07624	5.33e-08	1.55e-07	0.864961	9.98e-07	3.01e-06
Pcab044768	scaffold_56_1_2322569	813188	815552	+	K01770 2-C-methyl-D-erythritol 2,4-cyclodiphosphate synthase [EC:4.6.1.12] | (RefSeq) 2-C-methyl-D-erythritol 2,4-cyclodiphosphate synthase, chloroplastic (A)	up	down	NA	ko00900: Terpenoid backbone biosynthesis; ko01100: Metabolic pathways; ko01110: Biosynthesis of secondary metabolites	2-C-methyl-D-erythritol 2,4-cyclodiphosphate synthase, chloroplastic [Sesamum indicum]	ISPF_CATRO RecName: Full=2-C-methyl-D-erythritol 2,4-cyclodiphosphate synthase, chloroplastic {ECO:0000305}; Short=MECDP-synthase {ECO:0000305}; Short=MECPS {ECO:0000305}; EC=4.6.1.12 {ECO:0000250|UniProtKB:Q9CAK8}; Flags: Precursor;	A0A6I9TDP1_SESIN RecName: Full=2-C-methyl-D-erythritol 2,4-cyclodiphosphate synthase {ECO:0000256|ARBA:ARBA00012579, ECO:0000256|RuleBase:RU004395}; EC=4.6.1.12 {ECO:0000256|ARBA:ARBA00012579, ECO:0000256|RuleBase:RU004395};	--	GO:0009570,chloroplast stroma; GO:0008685,2-C-methyl-D-erythritol 2,4-cyclodiphosphate synthase activity; GO:0046872,metal ion binding; GO:0019288,isopentenyl diphosphate biosynthetic process, methylerythritol 4-phosphate pathway; GO:0016114,terpenoid biosynthetic process; GO:0003674,molecular_function; GO:0003824,catalytic activity; GO:0016829,lyase activity; GO:0016849,phosphorus-oxygen lyase a…	PF02542.19:YgbB family	0	0	0	0.1444	0.2302	0.5299	4.9011	5.8356	6.1967	NA	NA	NA	-8.39064	6.67e-12	2.59e-11	4.22193	2.76e-16	1.57e-15
Pcab092337	scaffold_1463	505112	507127	-	K01770 2-C-methyl-D-erythritol 2,4-cyclodiphosphate synthase [EC:4.6.1.12] | (RefSeq) 2-C-methyl-D-erythritol 2,4-cyclodiphosphate synthase, chloroplastic-like (A)	up	down	FALSE	ko00900: Terpenoid backbone biosynthesis; ko01100: Metabolic pathways; ko01110: Biosynthesis of secondary metabolites	2-C-methyl-D-erythritol 2,4-cyclodiphosphate synthase, partial [Pogostemon cablin]	ISPF_CATRO RecName: Full=2-C-methyl-D-erythritol 2,4-cyclodiphosphate synthase, chloroplastic {ECO:0000305}; Short=MECDP-synthase {ECO:0000305}; Short=MECPS {ECO:0000305}; EC=4.6.1.12 {ECO:0000250|UniProtKB:Q9CAK8}; Flags: Precursor;	A0A2D0U5W9_POGCB RecName: Full=2-C-methyl-D-erythritol 2,4-cyclodiphosphate synthase {ECO:0000256|ARBA:ARBA00012579, ECO:0000256|RuleBase:RU004395}; EC=4.6.1.12 {ECO:0000256|ARBA:ARBA00012579, ECO:0000256|RuleBase:RU004395}; Flags: Fragment;	--	GO:0009570,chloroplast stroma; GO:0008685,2-C-methyl-D-erythritol 2,4-cyclodiphosphate synthase activity; GO:0046872,metal ion binding; GO:0019288,isopentenyl diphosphate biosynthetic process, methylerythritol 4-phosphate pathway; GO:0016114,terpenoid biosynthetic process; GO:0003674,molecular_function; GO:0003824,catalytic activity; GO:0016829,lyase activity; GO:0016849,phosphorus-oxygen lyase a…	PF02542.19:YgbB family	7.077	5.8479	9.8614	6.7135	8.4928	7.3224	38.8895	41.6406	38.5929	0.186781	0.387803	0.525602	-2.19573	7.87e-45	8.64e-44	2.38749	6.94e-67	1.3e-65
Pcab112920	scaffold_1058	56911	59630	-	K01770 2-C-methyl-D-erythritol 2,4-cyclodiphosphate synthase [EC:4.6.1.12] | (RefSeq) 2-C-methyl-D-erythritol 2,4-cyclodiphosphate synthase, chloroplastic (A)	up	down	NA	ko00900: Terpenoid backbone biosynthesis; ko01100: Metabolic pathways; ko01110: Biosynthesis of secondary metabolites	hypothetical protein Pfo_025350 [Paulownia fortunei]	ISPF_CATRO RecName: Full=2-C-methyl-D-erythritol 2,4-cyclodiphosphate synthase, chloroplastic {ECO:0000305}; Short=MECDP-synthase {ECO:0000305}; Short=MECPS {ECO:0000305}; EC=4.6.1.12 {ECO:0000250|UniProtKB:Q9CAK8}; Flags: Precursor;	A0A6I9TDP1_SESIN RecName: Full=2-C-methyl-D-erythritol 2,4-cyclodiphosphate synthase {ECO:0000256|ARBA:ARBA00012579, ECO:0000256|RuleBase:RU004395}; EC=4.6.1.12 {ECO:0000256|ARBA:ARBA00012579, ECO:0000256|RuleBase:RU004395};	--	GO:0009570,chloroplast stroma; GO:0008685,2-C-methyl-D-erythritol 2,4-cyclodiphosphate synthase activity; GO:0046872,metal ion binding; GO:0019288,isopentenyl diphosphate biosynthetic process, methylerythritol 4-phosphate pathway; GO:0016114,terpenoid biosynthetic process; GO:0003674,molecular_function; GO:0003824,catalytic activity; GO:0016829,lyase activity; GO:0016849,phosphorus-oxygen lyase a…	PF02542.19:YgbB family	0	0.1593	0	0.6503	0.0768	0.2273	9.0123	8.2626	11.7781	NA	NA	NA	-7.3094	3.97e-12	1.56e-11	4.8883	7.96e-25	6.26e-24
Pcab118901	scaffold_1496	235508	239554	-	K01770 2-C-methyl-D-erythritol 2,4-cyclodiphosphate synthase [EC:4.6.1.12] | (RefSeq) 2-C-methyl-D-erythritol 2,4-cyclodiphosphate synthase, chloroplastic (A)	up	down	NA	ko00900: Terpenoid backbone biosynthesis; ko01100: Metabolic pathways; ko01110: Biosynthesis of secondary metabolites	hypothetical protein Pfo_025350 [Paulownia fortunei]	ISPF_CATRO RecName: Full=2-C-methyl-D-erythritol 2,4-cyclodiphosphate synthase, chloroplastic {ECO:0000305}; Short=MECDP-synthase {ECO:0000305}; Short=MECPS {ECO:0000305}; EC=4.6.1.12 {ECO:0000250|UniProtKB:Q9CAK8}; Flags: Precursor;	A0A6I9TDP1_SESIN RecName: Full=2-C-methyl-D-erythritol 2,4-cyclodiphosphate synthase {ECO:0000256|ARBA:ARBA00012579, ECO:0000256|RuleBase:RU004395}; EC=4.6.1.12 {ECO:0000256|ARBA:ARBA00012579, ECO:0000256|RuleBase:RU004395};	--	GO:0009570,chloroplast stroma; GO:0008685,2-C-methyl-D-erythritol 2,4-cyclodiphosphate synthase activity; GO:0046872,metal ion binding; GO:0019288,isopentenyl diphosphate biosynthetic process, methylerythritol 4-phosphate pathway; GO:0016114,terpenoid biosynthetic process; GO:0003674,molecular_function; GO:0003824,catalytic activity; GO:0016829,lyase activity; GO:0016849,phosphorus-oxygen lyase a…	PF02542.19:YgbB family	0.3442	0.0691	0.0708	0.2508	0.7997	0.1972	2.1719	3.8377	3.2762	NA	NA	NA	-4.06514	3.38e-09	1.09e-08	2.89096	2.86e-08	9.95e-08
2-phospho-4-(cytidine 5'-diphospho)-2-C-methyl-D-erythritol	EC:2.7.1.148 4-diphosphocytidyl-2-C-methyl-D-erythritol kinase
Pcab013685	scaffold_48	1043770	1049212	+	K00919 4-diphosphocytidyl-2-C-methyl-D-erythritol kinase [EC:2.7.1.148] | (RefSeq) 4-diphosphocytidyl-2-C-methyl-D-erythritol kinase, chloroplastic (A)	up	down	FALSE	ko00900: Terpenoid backbone biosynthesis; ko01100: Metabolic pathways; ko01110: Biosynthesis of secondary metabolites	4-diphosphocytidyl-2-C-methyl-D-erythritol kinas, partial [Pogostemon cablin]	ISPE_MENPI RecName: Full=4-diphosphocytidyl-2-C-methyl-D-erythritol kinase, chloroplastic; EC=2.7.1.148; AltName: Full=4-(cytidine-5'-diphospho)-2-C-methyl-D-erythritol kinase; Short=CMK; Flags: Precursor;	A0A2D0UJ88_POGCB RecName: Full=4-(cytidine 5'-diphospho)-2-C-methyl-D-erythritol kinase {ECO:0000256|ARBA:ARBA00012052}; EC=2.7.1.148 {ECO:0000256|ARBA:ARBA00012052}; AltName: Full=4-(cytidine-5'-diphospho)-2-C-methyl-D-erythritol kinase {ECO:0000256|ARBA:ARBA00032554}; Flags: Fragment;	--	GO:0009507,chloroplast; GO:0050515,4-(cytidine 5'-diphospho)-2-C-methyl-D-erythritol kinase activity; GO:0005524,ATP binding; GO:0019288,isopentenyl diphosphate biosynthetic process, methylerythritol 4-phosphate pathway; GO:0016310,phosphorylation; GO:0016114,terpenoid biosynthetic process; GO:0003674,molecular_function; GO:0003824,catalytic activity; GO:0016301,kinase activity; GO:0016740,transf…	PF00288.29:GHMP kinases N terminal domain	2.2875	2.9652	2.0543	3.2195	3.0601	3.7339	16.6917	16.1868	16.4478	-0.281265	0.245496	0.373644	-2.56066	6e-49	7.07e-48	2.28366	2.01e-50	2.91e-49
Pcab049728	scaffold_312	664308	670174	+	K00919 4-diphosphocytidyl-2-C-methyl-D-erythritol kinase [EC:2.7.1.148] | (RefSeq) 4-diphosphocytidyl-2-C-methyl-D-erythritol kinase, chloroplastic (A)	up	down	FALSE	ko00900: Terpenoid backbone biosynthesis; ko01100: Metabolic pathways; ko01110: Biosynthesis of secondary metabolites	4-diphosphocytidyl-2-C-methyl-D-erythritol kinas, partial [Pogostemon cablin]	ISPE_MENPI RecName: Full=4-diphosphocytidyl-2-C-methyl-D-erythritol kinase, chloroplastic; EC=2.7.1.148; AltName: Full=4-(cytidine-5'-diphospho)-2-C-methyl-D-erythritol kinase; Short=CMK; Flags: Precursor;	A0A2D0UJ88_POGCB RecName: Full=4-(cytidine 5'-diphospho)-2-C-methyl-D-erythritol kinase {ECO:0000256|ARBA:ARBA00012052}; EC=2.7.1.148 {ECO:0000256|ARBA:ARBA00012052}; AltName: Full=4-(cytidine-5'-diphospho)-2-C-methyl-D-erythritol kinase {ECO:0000256|ARBA:ARBA00032554}; Flags: Fragment;	--	GO:0009507,chloroplast; GO:0050515,4-(cytidine 5'-diphospho)-2-C-methyl-D-erythritol kinase activity; GO:0005524,ATP binding; GO:0019288,isopentenyl diphosphate biosynthetic process, methylerythritol 4-phosphate pathway; GO:0016310,phosphorylation; GO:0016114,terpenoid biosynthetic process; GO:0003674,molecular_function; GO:0003824,catalytic activity; GO:0016301,kinase activity; GO:0016740,transf…	PF00288.29:GHMP kinases N terminal domain	1.3511	1.0599	2.4764	1.3842	1.9211	1.2097	5.3285	5.8178	5.3105	0.28222	0.435071	0.571321	-1.56309	1.76e-08	5.35e-08	1.85033	1.07e-13	5.38e-13
Pcab060673	scaffold_408	757839	762210	-	K00919 4-diphosphocytidyl-2-C-methyl-D-erythritol kinase [EC:2.7.1.148] | (RefSeq) 4-diphosphocytidyl-2-C-methyl-D-erythritol kinase, chloroplastic-like (A)	up	down	FALSE	ko00900: Terpenoid backbone biosynthesis; ko01100: Metabolic pathways; ko01110: Biosynthesis of secondary metabolites	4-diphosphocytidyl-2-C-methyl-D-erythritol kinas, partial [Pogostemon cablin]	ISPE_MENPI RecName: Full=4-diphosphocytidyl-2-C-methyl-D-erythritol kinase, chloroplastic; EC=2.7.1.148; AltName: Full=4-(cytidine-5'-diphospho)-2-C-methyl-D-erythritol kinase; Short=CMK; Flags: Precursor;	A0A2D0UJ88_POGCB RecName: Full=4-(cytidine 5'-diphospho)-2-C-methyl-D-erythritol kinase {ECO:0000256|ARBA:ARBA00012052}; EC=2.7.1.148 {ECO:0000256|ARBA:ARBA00012052}; AltName: Full=4-(cytidine-5'-diphospho)-2-C-methyl-D-erythritol kinase {ECO:0000256|ARBA:ARBA00032554}; Flags: Fragment;	--	GO:0009507,chloroplast; GO:0050515,4-(cytidine 5'-diphospho)-2-C-methyl-D-erythritol kinase activity; GO:0005524,ATP binding; GO:0019288,isopentenyl diphosphate biosynthetic process, methylerythritol 4-phosphate pathway; GO:0016310,phosphorylation; GO:0016114,terpenoid biosynthetic process; GO:0003674,molecular_function; GO:0003824,catalytic activity; GO:0016301,kinase activity; GO:0016740,transf…	PF00288.29:GHMP kinases N terminal domain	3.2954	2.3087	3.1545	3.4897	4.971	3.8794	22.0525	21.8464	21.9712	-0.32202	0.281426	0.414332	-2.71791	7.64e-40	7.58e-39	2.40134	1.11e-38	1.26e-37
Pcab068853	scaffold_523	689248	694938	-	K00919 4-diphosphocytidyl-2-C-methyl-D-erythritol kinase [EC:2.7.1.148] | (RefSeq) 4-diphosphocytidyl-2-C-methyl-D-erythritol kinase, chloroplastic (A)	up	down	down	ko00900: Terpenoid backbone biosynthesis; ko01100: Metabolic pathways; ko01110: Biosynthesis of secondary metabolites	4-diphosphocytidyl-2-C-methyl-D-erythritol kinas, partial [Pogostemon cablin]	ISPE_MENPI RecName: Full=4-diphosphocytidyl-2-C-methyl-D-erythritol kinase, chloroplastic; EC=2.7.1.148; AltName: Full=4-(cytidine-5'-diphospho)-2-C-methyl-D-erythritol kinase; Short=CMK; Flags: Precursor;	A0A2D0UJ88_POGCB RecName: Full=4-(cytidine 5'-diphospho)-2-C-methyl-D-erythritol kinase {ECO:0000256|ARBA:ARBA00012052}; EC=2.7.1.148 {ECO:0000256|ARBA:ARBA00012052}; AltName: Full=4-(cytidine-5'-diphospho)-2-C-methyl-D-erythritol kinase {ECO:0000256|ARBA:ARBA00032554}; Flags: Fragment;	--	GO:0009507,chloroplast; GO:0050515,4-(cytidine 5'-diphospho)-2-C-methyl-D-erythritol kinase activity; GO:0005524,ATP binding; GO:0019288,isopentenyl diphosphate biosynthetic process, methylerythritol 4-phosphate pathway; GO:0016310,phosphorylation; GO:0016114,terpenoid biosynthetic process; GO:0003674,molecular_function; GO:0003824,catalytic activity; GO:0016301,kinase activity; GO:0016740,transf…	PF08544.16:GHMP kinases C terminal	2.7319	2.2534	1.9076	4.5316	5.573	6.2435	10.7129	12.5209	11.2772	-1.07067	0.0010585	0.0036458	-2.13035	8.46e-14	3.66e-13	1.06485	3.37e-06	9.63e-06
Pcab109648	scaffold_1547	187923	191302	+	K00919 4-diphosphocytidyl-2-C-methyl-D-erythritol kinase [EC:2.7.1.148] | (RefSeq) 4-diphosphocytidyl-2-C-methyl-D-erythritol kinase, chloroplastic (A)	up	down	FALSE	ko00900: Terpenoid backbone biosynthesis; ko01100: Metabolic pathways; ko01110: Biosynthesis of secondary metabolites	4-diphosphocytidyl-2-C-methyl-D-erythritol kinas, partial [Pogostemon cablin]	ISPE_MENPI RecName: Full=4-diphosphocytidyl-2-C-methyl-D-erythritol kinase, chloroplastic; EC=2.7.1.148; AltName: Full=4-(cytidine-5'-diphospho)-2-C-methyl-D-erythritol kinase; Short=CMK; Flags: Precursor;	A0A2D0UJ88_POGCB RecName: Full=4-(cytidine 5'-diphospho)-2-C-methyl-D-erythritol kinase {ECO:0000256|ARBA:ARBA00012052}; EC=2.7.1.148 {ECO:0000256|ARBA:ARBA00012052}; AltName: Full=4-(cytidine-5'-diphospho)-2-C-methyl-D-erythritol kinase {ECO:0000256|ARBA:ARBA00032554}; Flags: Fragment;	--	GO:0009507,chloroplast; GO:0050515,4-(cytidine 5'-diphospho)-2-C-methyl-D-erythritol kinase activity; GO:0005524,ATP binding; GO:0019288,isopentenyl diphosphate biosynthetic process, methylerythritol 4-phosphate pathway; GO:0016310,phosphorylation; GO:0016114,terpenoid biosynthetic process; GO:0003674,molecular_function; GO:0003824,catalytic activity; GO:0016301,kinase activity; GO:0016740,transf…	PF00288.29:GHMP kinases N terminal domain	2.3149	5.2301	4.3919	4.2163	4.6223	4.2837	19.0813	21.2301	16.0667	0.0330461	0.90857	0.943591	-2.04873	8.57e-20	4.87e-19	2.08645	5.64e-29	5.03e-28
4-(cytidine-5'-diphospho)-2-C-methyl-D-erythritol	EC:2.7.7.60 2-C-methyl-D-erythritol 4-phosphate cytidylyltransferase
Pcab019240	scaffold_51	2409570	2415454	+	K00991 2-C-methyl-D-erythritol 4-phosphate cytidylyltransferase [EC:2.7.7.60] | (RefSeq) 2-C-methyl-D-erythritol 4-phosphate cytidylyltransferase, chloroplastic isoform X1 (A)	up	down	FALSE	ko00900: Terpenoid backbone biosynthesis; ko01100: Metabolic pathways; ko01110: Biosynthesis of secondary metabolites	2-C-methyl-D-erythritol 4-phosphate cytidylyltransferase, partial [Pogostemon cablin]	ISPD_ARATH RecName: Full=2-C-methyl-D-erythritol 4-phosphate cytidylyltransferase, chloroplastic; EC=2.7.7.60 {ECO:0000269|PubMed:10841550}; AltName: Full=4-diphosphocytidyl-2C-methyl-D-erythritol synthase; AltName: Full=MEP cytidylyltransferase; Short=AtMECT; Short=AtMEPCT; Flags: Precursor;	A0A2D0UJE7_POGCB RecName: Full=2-C-methyl-D-erythritol 4-phosphate cytidylyltransferase {ECO:0000256|ARBA:ARBA00012526}; EC=2.7.7.60 {ECO:0000256|ARBA:ARBA00012526}; Flags: Fragment;	--	GO:0009507,chloroplast; GO:0009570,chloroplast stroma; GO:0050518,2-C-methyl-D-erythritol 4-phosphate cytidylyltransferase activity; GO:0019288,isopentenyl diphosphate biosynthetic process, methylerythritol 4-phosphate pathway; GO:0003674,molecular_function; GO:0003824,catalytic activity; GO:0016740,transferase activity; GO:0016772,transferase activity, transferring phosphorus-containing groups; …	PF01128.22:2-C-methyl-D-erythritol 4-phosphate cytidylyltransferase	0.6966	1.1492	0.6656	1.1782	0.9635	1.5683	11.3668	9.7879	9.8111	-0.388968	0.37833	0.516222	-3.42771	6.73e-35	5.95e-34	3.04263	8.26e-37	8.97e-36
Pcab061120	scaffold_392	910071	915137	-	K00991 2-C-methyl-D-erythritol 4-phosphate cytidylyltransferase [EC:2.7.7.60] | (RefSeq) 2-C-methyl-D-erythritol 4-phosphate cytidylyltransferase, chloroplastic-like (A)	up	down	down	ko00900: Terpenoid backbone biosynthesis; ko01100: Metabolic pathways; ko01110: Biosynthesis of secondary metabolites	2-C-methyl-D-erythritol 4-phosphate cytidylyltransferase, partial [Pogostemon cablin]	ISPD_ARATH RecName: Full=2-C-methyl-D-erythritol 4-phosphate cytidylyltransferase, chloroplastic; EC=2.7.7.60 {ECO:0000269|PubMed:10841550}; AltName: Full=4-diphosphocytidyl-2C-methyl-D-erythritol synthase; AltName: Full=MEP cytidylyltransferase; Short=AtMECT; Short=AtMEPCT; Flags: Precursor;	A0A2D0UJE7_POGCB RecName: Full=2-C-methyl-D-erythritol 4-phosphate cytidylyltransferase {ECO:0000256|ARBA:ARBA00012526}; EC=2.7.7.60 {ECO:0000256|ARBA:ARBA00012526}; Flags: Fragment;	--	GO:0009507,chloroplast; GO:0009570,chloroplast stroma; GO:0050518,2-C-methyl-D-erythritol 4-phosphate cytidylyltransferase activity; GO:0019288,isopentenyl diphosphate biosynthetic process, methylerythritol 4-phosphate pathway; GO:0003674,molecular_function; GO:0003824,catalytic activity; GO:0016740,transferase activity; GO:0016772,transferase activity, transferring phosphorus-containing groups; …	PF01128.22:2-C-methyl-D-erythritol 4-phosphate cytidylyltransferase	0.4259	0.4888	0.5009	1.7731	1.0602	1.9176	2.9947	8.1278	5.0329	-1.57534	0.00240249	0.00760297	-3.32698	2.31e-13	9.76e-13	1.75619	7.38e-07	2.26e-06
Pcab085992	scaffold_939	337659	343030	-	K00991 2-C-methyl-D-erythritol 4-phosphate cytidylyltransferase [EC:2.7.7.60] | (RefSeq) 2-C-methyl-D-erythritol 4-phosphate cytidylyltransferase, chloroplastic-like (A)	up	down	FALSE	ko00900: Terpenoid backbone biosynthesis; ko01100: Metabolic pathways; ko01110: Biosynthesis of secondary metabolites	2-C-methyl-D-erythritol 4-phosphate cytidylyltransferase, partial [Pogostemon cablin]	ISPD_ARATH RecName: Full=2-C-methyl-D-erythritol 4-phosphate cytidylyltransferase, chloroplastic; EC=2.7.7.60 {ECO:0000269|PubMed:10841550}; AltName: Full=4-diphosphocytidyl-2C-methyl-D-erythritol synthase; AltName: Full=MEP cytidylyltransferase; Short=AtMECT; Short=AtMEPCT; Flags: Precursor;	A0A2D0UJE7_POGCB RecName: Full=2-C-methyl-D-erythritol 4-phosphate cytidylyltransferase {ECO:0000256|ARBA:ARBA00012526}; EC=2.7.7.60 {ECO:0000256|ARBA:ARBA00012526}; Flags: Fragment;	--	GO:0009507,chloroplast; GO:0009570,chloroplast stroma; GO:0050518,2-C-methyl-D-erythritol 4-phosphate cytidylyltransferase activity; GO:0019288,isopentenyl diphosphate biosynthetic process, methylerythritol 4-phosphate pathway; GO:0003674,molecular_function; GO:0003824,catalytic activity; GO:0016740,transferase activity; GO:0016772,transferase activity, transferring phosphorus-containing groups; …	PF01128.22:2-C-methyl-D-erythritol 4-phosphate cytidylyltransferase	0.7922	0.6961	0.8661	1.0822	0.9587	1.0404	4.6866	3.7498	4.9934	-0.217232	0.62701	0.739086	-2.31853	5.8e-12	2.26e-11	2.10467	4.16e-12	1.91e-11
Pcab111231	scaffold_2190	105659	110802	-	K00991 2-C-methyl-D-erythritol 4-phosphate cytidylyltransferase [EC:2.7.7.60] | (RefSeq) 2-C-methyl-D-erythritol 4-phosphate cytidylyltransferase, chloroplastic isoform X1 (A)	up	down	FALSE	ko00900: Terpenoid backbone biosynthesis; ko01100: Metabolic pathways; ko01110: Biosynthesis of secondary metabolites	2-C-methyl-D-erythritol 4-phosphate cytidylyltransferase, partial [Pogostemon cablin]	ISPD_ARATH RecName: Full=2-C-methyl-D-erythritol 4-phosphate cytidylyltransferase, chloroplastic; EC=2.7.7.60 {ECO:0000269|PubMed:10841550}; AltName: Full=4-diphosphocytidyl-2C-methyl-D-erythritol synthase; AltName: Full=MEP cytidylyltransferase; Short=AtMECT; Short=AtMEPCT; Flags: Precursor;	A0A2D0UJE7_POGCB RecName: Full=2-C-methyl-D-erythritol 4-phosphate cytidylyltransferase {ECO:0000256|ARBA:ARBA00012526}; EC=2.7.7.60 {ECO:0000256|ARBA:ARBA00012526}; Flags: Fragment;	--	GO:0009507,chloroplast; GO:0009570,chloroplast stroma; GO:0050518,2-C-methyl-D-erythritol 4-phosphate cytidylyltransferase activity; GO:0019288,isopentenyl diphosphate biosynthetic process, methylerythritol 4-phosphate pathway; GO:0003674,molecular_function; GO:0003824,catalytic activity; GO:0016740,transferase activity; GO:0016772,transferase activity, transferring phosphorus-containing groups; …	PF01128.22:2-C-methyl-D-erythritol 4-phosphate cytidylyltransferase	0.5298	0.266	0.4906	0.7719	0.7693	1.1637	6.0842	6.9099	7.5038	-0.898623	0.115405	0.206878	-3.80383	8.11e-24	5.29e-23	2.90936	5.13e-23	3.8e-22
2-C-methyl-D-erythritol 4-phosphate	EC:1.1.1.267 1-deoxy-D-xylulose-5-phosphate reductoisomerase
Pcab009076	scaffold_63	343512	347518	+	K00099 1-deoxy-D-xylulose-5-phosphate reductoisomerase [EC:1.1.1.267] | (RefSeq) 1-deoxy-D-xylulose 5-phosphate reductoisomerase, chloroplastic (A)	up	down	FALSE	ko00900: Terpenoid backbone biosynthesis; ko01100: Metabolic pathways; ko01110: Biosynthesis of secondary metabolites	1-deoxy-d-xylulose 5-phosphate reductoisomeras, partial [Pogostemon cablin]	DXR_MENPI RecName: Full=1-deoxy-D-xylulose 5-phosphate reductoisomerase, chloroplastic; Short=1-deoxyxylulose-5-phosphate reductoisomerase; Short=DXP reductoisomerase; EC=1.1.1.267; AltName: Full=2-C-methyl-D-erythritol 4-phosphate synthase; Flags: Precursor;	A0A2D0UG98_POGCB RecName: Full=1-deoxy-D-xylulose-5-phosphate reductoisomerase {ECO:0000256|ARBA:ARBA00012366}; EC=1.1.1.267 {ECO:0000256|ARBA:ARBA00012366}; Flags: Fragment;	--	GO:0009507,chloroplast; GO:0030604,1-deoxy-D-xylulose-5-phosphate reductoisomerase activity; GO:0046872,metal ion binding; GO:0070402,NADPH binding; GO:0019288,isopentenyl diphosphate biosynthetic process, methylerythritol 4-phosphate pathway; GO:0003674,molecular_function; GO:0003824,catalytic activity; GO:0016491,oxidoreductase activity; GO:0016614,oxidoreductase activity, acting on CH-OH group…	PF02670.19:1-deoxy-D-xylulose 5-phosphate reductoisomerase	8.0382	9.484	8.8917	10.1874	10.084	9.0846	36.1402	37.238	34.6122	0.0186301	0.879779	0.925247	-1.83885	1.8e-75	3.18e-74	1.86151	1.98e-84	4.78e-83
Pcab058079	scaffold_769	472713	476725	+	K00099 1-deoxy-D-xylulose-5-phosphate reductoisomerase [EC:1.1.1.267] | (RefSeq) 1-deoxy-D-xylulose 5-phosphate reductoisomerase, chloroplastic (A)	up	down	FALSE	ko00900: Terpenoid backbone biosynthesis; ko01100: Metabolic pathways; ko01110: Biosynthesis of secondary metabolites	1-deoxy-d-xylulose 5-phosphate reductoisomeras, partial [Pogostemon cablin]	DXR_MENPI RecName: Full=1-deoxy-D-xylulose 5-phosphate reductoisomerase, chloroplastic; Short=1-deoxyxylulose-5-phosphate reductoisomerase; Short=DXP reductoisomerase; EC=1.1.1.267; AltName: Full=2-C-methyl-D-erythritol 4-phosphate synthase; Flags: Precursor;	A0A2D0UG98_POGCB RecName: Full=1-deoxy-D-xylulose-5-phosphate reductoisomerase {ECO:0000256|ARBA:ARBA00012366}; EC=1.1.1.267 {ECO:0000256|ARBA:ARBA00012366}; Flags: Fragment;	--	GO:0009507,chloroplast; GO:0030604,1-deoxy-D-xylulose-5-phosphate reductoisomerase activity; GO:0046872,metal ion binding; GO:0070402,NADPH binding; GO:0019288,isopentenyl diphosphate biosynthetic process, methylerythritol 4-phosphate pathway; GO:0003674,molecular_function; GO:0003824,catalytic activity; GO:0016491,oxidoreductase activity; GO:0016614,oxidoreductase activity, acting on CH-OH group…	PF02670.19:1-deoxy-D-xylulose 5-phosphate reductoisomerase	9.6111	9.7185	9.0255	9.3649	6.5393	7.8315	36.3046	35.7023	37.8897	0.427726	0.00191183	0.00621025	-1.76121	1.19e-72	2.03e-71	2.19266	4.79e-86	1.19e-84
Pcab066648	scaffold_815	3736	7882	-	K00099 1-deoxy-D-xylulose-5-phosphate reductoisomerase [EC:1.1.1.267] | (RefSeq) 1-deoxy-D-xylulose 5-phosphate reductoisomerase, chloroplastic (A)	FALSE	down	FALSE	ko00900: Terpenoid backbone biosynthesis; ko01100: Metabolic pathways; ko01110: Biosynthesis of secondary metabolites	1-deoxy-d-xylulose 5-phosphate reductoisomeras, partial [Pogostemon cablin]	DXR_MENPI RecName: Full=1-deoxy-D-xylulose 5-phosphate reductoisomerase, chloroplastic; Short=1-deoxyxylulose-5-phosphate reductoisomerase; Short=DXP reductoisomerase; EC=1.1.1.267; AltName: Full=2-C-methyl-D-erythritol 4-phosphate synthase; Flags: Precursor;	A0A2D0UG98_POGCB RecName: Full=1-deoxy-D-xylulose-5-phosphate reductoisomerase {ECO:0000256|ARBA:ARBA00012366}; EC=1.1.1.267 {ECO:0000256|ARBA:ARBA00012366}; Flags: Fragment;	--	GO:0009507,chloroplast; GO:0030604,1-deoxy-D-xylulose-5-phosphate reductoisomerase activity; GO:0046872,metal ion binding; GO:0070402,NADPH binding; GO:0019288,isopentenyl diphosphate biosynthetic process, methylerythritol 4-phosphate pathway; GO:0003674,molecular_function; GO:0003824,catalytic activity; GO:0016491,oxidoreductase activity; GO:0016614,oxidoreductase activity, acting on CH-OH group…	PF02670.19:1-deoxy-D-xylulose 5-phosphate reductoisomerase	11.5405	11.4475	10.6481	22.3615	18.9492	21.6089	32.7597	30.9569	33.7065	-0.731252	7.43e-13	7.74e-12	-1.34057	3.66e-41	3.74e-40	0.61342	2.08e-11	9.14e-11
Pcab073495	scaffold_25_1_429759	249312	253339	+	K00099 1-deoxy-D-xylulose-5-phosphate reductoisomerase [EC:1.1.1.267] | (RefSeq) 1-deoxy-D-xylulose 5-phosphate reductoisomerase, chloroplastic (A)	up	down	FALSE	ko00900: Terpenoid backbone biosynthesis; ko01100: Metabolic pathways; ko01110: Biosynthesis of secondary metabolites	1-deoxy-d-xylulose 5-phosphate reductoisomeras, partial [Pogostemon cablin]	DXR_MENPI RecName: Full=1-deoxy-D-xylulose 5-phosphate reductoisomerase, chloroplastic; Short=1-deoxyxylulose-5-phosphate reductoisomerase; Short=DXP reductoisomerase; EC=1.1.1.267; AltName: Full=2-C-methyl-D-erythritol 4-phosphate synthase; Flags: Precursor;	A0A2D0UG98_POGCB RecName: Full=1-deoxy-D-xylulose-5-phosphate reductoisomerase {ECO:0000256|ARBA:ARBA00012366}; EC=1.1.1.267 {ECO:0000256|ARBA:ARBA00012366}; Flags: Fragment;	--	GO:0009507,chloroplast; GO:0030604,1-deoxy-D-xylulose-5-phosphate reductoisomerase activity; GO:0046872,metal ion binding; GO:0070402,NADPH binding; GO:0019288,isopentenyl diphosphate biosynthetic process, methylerythritol 4-phosphate pathway; GO:0003674,molecular_function; GO:0003824,catalytic activity; GO:0016491,oxidoreductase activity; GO:0016614,oxidoreductase activity, acting on CH-OH group…	PF02670.19:1-deoxy-D-xylulose 5-phosphate reductoisomerase	4.7224	4.5739	4.8594	3.9347	2.9831	4.4144	49.5818	50.8367	49.9827	0.492945	0.00699657	0.0195414	-3.21672	2.14e-206	1.23e-204	3.71267	3.83e-235	3.27e-233
1-deoxy-D-xylulose 5-phosphate	EC:2.2.1.7 1-deoxy-D-xylulose-5-phosphate synthase
Pcab014401	scaffold_81	683278	685686	-	K01662 1-deoxy-D-xylulose-5-phosphate synthase [EC:2.2.1.7] | (RefSeq) probable 1-deoxy-D-xylulose-5-phosphate synthase 2, chloroplastic (A)	down	up	up	ko00730: Thiamine metabolism; ko00900: Terpenoid backbone biosynthesis; ko01100: Metabolic pathways; ko01110: Biosynthesis of secondary metabolites	1-deoxy-D-xylulose-5-phosphate synthase decarboxylase [Scutellaria barbata]	DXS2_ORYSJ RecName: Full=Probable 1-deoxy-D-xylulose-5-phosphate synthase 2, chloroplastic; Short=1-deoxyxylulose-5-phosphate synthase; Short=DXP synthase; Short=DXPS; EC=2.2.1.7; Flags: Precursor;	A0A6B7LPD1_9LAMI RecName: Full=1-deoxy-D-xylulose-5-phosphate synthase {ECO:0000256|ARBA:ARBA00013150}; EC=2.2.1.7 {ECO:0000256|ARBA:ARBA00013150};	Transketolase	GO:0009507,chloroplast; GO:0008661,1-deoxy-D-xylulose-5-phosphate synthase activity; GO:0046872,metal ion binding; GO:0016744,transketolase or transaldolase activity; GO:0052865,1-deoxy-D-xylulose 5-phosphate biosynthetic process; GO:0016114,terpenoid biosynthetic process; GO:0009228,thiamine biosynthetic process; GO:0003674,molecular_function; GO:0003824,catalytic activity; GO:0016740,transferas…	PF13292.9:1-deoxy-D-xylulose-5-phosphate synthase	5.6647	6.8178	7.1933	2.4879	2.4504	2.686	0.507	0.5916	1.0926	1.53888	1.33e-15	1.64e-14	3.35091	4.44e-30	3.47e-29	-1.80832	4.94e-07	1.54e-06
Pcab059680	scaffold_712	417259	420142	-	K01662 1-deoxy-D-xylulose-5-phosphate synthase [EC:2.2.1.7] | (RefSeq) probable 1-deoxy-D-xylulose-5-phosphate synthase 2, chloroplastic (A)	down	up	up	ko00730: Thiamine metabolism; ko00900: Terpenoid backbone biosynthesis; ko01100: Metabolic pathways; ko01110: Biosynthesis of secondary metabolites	1-deoxy-D-xylulose-5-phosphate synthase decarboxylase [Scutellaria barbata]	DXS2_ORYSJ RecName: Full=Probable 1-deoxy-D-xylulose-5-phosphate synthase 2, chloroplastic; Short=1-deoxyxylulose-5-phosphate synthase; Short=DXP synthase; Short=DXPS; EC=2.2.1.7; Flags: Precursor;	A0A6B7LPD1_9LAMI RecName: Full=1-deoxy-D-xylulose-5-phosphate synthase {ECO:0000256|ARBA:ARBA00013150}; EC=2.2.1.7 {ECO:0000256|ARBA:ARBA00013150};	Transketolase	GO:0009507,chloroplast; GO:0008661,1-deoxy-D-xylulose-5-phosphate synthase activity; GO:0046872,metal ion binding; GO:0016744,transketolase or transaldolase activity; GO:0052865,1-deoxy-D-xylulose 5-phosphate biosynthetic process; GO:0016114,terpenoid biosynthetic process; GO:0009228,thiamine biosynthetic process; GO:0003674,molecular_function; GO:0003824,catalytic activity; GO:0016740,transferas…	PF13292.9:1-deoxy-D-xylulose-5-phosphate synthase	5.8871	7.3237	6.2262	1.8467	1.5198	1.5619	0.4953	0.6537	0.4447	2.14959	2.65e-28	5.82e-27	3.79215	5.26e-40	5.23e-39	-1.64048	1.48e-05	3.93e-05
Pcab065572	scaffold_702	50291	53101	-	K01662 1-deoxy-D-xylulose-5-phosphate synthase [EC:2.2.1.7] | (RefSeq) probable 1-deoxy-D-xylulose-5-phosphate synthase 2, chloroplastic (A)	down	up	up	ko00730: Thiamine metabolism; ko00900: Terpenoid backbone biosynthesis; ko01100: Metabolic pathways; ko01110: Biosynthesis of secondary metabolites	1-deoxy-D-xylulose-5-phosphate synthase decarboxylase [Scutellaria barbata]	DXS2_ORYSJ RecName: Full=Probable 1-deoxy-D-xylulose-5-phosphate synthase 2, chloroplastic; Short=1-deoxyxylulose-5-phosphate synthase; Short=DXP synthase; Short=DXPS; EC=2.2.1.7; Flags: Precursor;	A0A6B7LPD1_9LAMI RecName: Full=1-deoxy-D-xylulose-5-phosphate synthase {ECO:0000256|ARBA:ARBA00013150}; EC=2.2.1.7 {ECO:0000256|ARBA:ARBA00013150};	Transketolase	GO:0009507,chloroplast; GO:0008661,1-deoxy-D-xylulose-5-phosphate synthase activity; GO:0046872,metal ion binding; GO:0016744,transketolase or transaldolase activity; GO:0052865,1-deoxy-D-xylulose 5-phosphate biosynthetic process; GO:0016114,terpenoid biosynthetic process; GO:0009228,thiamine biosynthetic process; GO:0003674,molecular_function; GO:0003824,catalytic activity; GO:0016740,transferas…	PF13292.9:1-deoxy-D-xylulose-5-phosphate synthase	2.239	2.2804	2.3368	1.2234	1.0528	0.4277	0.0807	0	0.0362	1.50955	1.99e-06	1.11e-05	6.15425	3.22e-12	1.27e-11	-4.63102	2.21e-06	6.43e-06
Pcab007696	scaffold_3_1_2645500	1484502	1487707	+	K01662 1-deoxy-D-xylulose-5-phosphate synthase [EC:2.2.1.7] | (RefSeq) probable 1-deoxy-D-xylulose-5-phosphate synthase 2, chloroplastic (A)	up	down	NA	ko00730: Thiamine metabolism; ko00900: Terpenoid backbone biosynthesis; ko01100: Metabolic pathways; ko01110: Biosynthesis of secondary metabolites	hypothetical protein Pfo_003329 [Paulownia fortunei]	DXS2_ORYSJ RecName: Full=Probable 1-deoxy-D-xylulose-5-phosphate synthase 2, chloroplastic; Short=1-deoxyxylulose-5-phosphate synthase; Short=DXP synthase; Short=DXPS; EC=2.2.1.7; Flags: Precursor;	A0A6I9SLE0_SESIN RecName: Full=1-deoxy-D-xylulose-5-phosphate synthase {ECO:0000256|ARBA:ARBA00013150}; EC=2.2.1.7 {ECO:0000256|ARBA:ARBA00013150};	Transketolase	GO:0009507,chloroplast; GO:0008661,1-deoxy-D-xylulose-5-phosphate synthase activity; GO:0046872,metal ion binding; GO:0016744,transketolase or transaldolase activity; GO:0052865,1-deoxy-D-xylulose 5-phosphate biosynthetic process; GO:0016114,terpenoid biosynthetic process; GO:0009228,thiamine biosynthetic process; GO:0003674,molecular_function; GO:0003824,catalytic activity; GO:0016740,transferas…	PF13292.9:1-deoxy-D-xylulose-5-phosphate synthase	0.0666	0	0	0.091	0.0968	0.1591	1.8501	0.6308	0.9438	NA	NA	NA	-5.46448	1.83e-06	4.63e-06	3.27764	2.9e-07	9.22e-07
Pcab010188	scaffold_8	5946848	5951454	+	K01662 1-deoxy-D-xylulose-5-phosphate synthase [EC:2.2.1.7] | (RefSeq) probable 1-deoxy-D-xylulose-5-phosphate synthase, chloroplastic (A)	up	down	down	ko00730: Thiamine metabolism; ko00900: Terpenoid backbone biosynthesis; ko01100: Metabolic pathways; ko01110: Biosynthesis of secondary metabolites	1-deoxy-xylulose 5-phosphate synthase, partial [Pogostemon cablin]	DXS_CAPAN RecName: Full=Probable 1-deoxy-D-xylulose-5-phosphate synthase, chloroplastic; Short=1-deoxyxylulose-5-phosphate synthase; Short=DXP synthase; Short=DXPS; EC=2.2.1.7; AltName: Full=CapTKT2; Flags: Precursor;	A0A2D0U5C7_POGCB RecName: Full=1-deoxy-D-xylulose-5-phosphate synthase {ECO:0000256|ARBA:ARBA00013150}; EC=2.2.1.7 {ECO:0000256|ARBA:ARBA00013150}; Flags: Fragment;	Transketolase	GO:0009507,chloroplast; GO:0008661,1-deoxy-D-xylulose-5-phosphate synthase activity; GO:0046872,metal ion binding; GO:0052865,1-deoxy-D-xylulose 5-phosphate biosynthetic process; GO:0016114,terpenoid biosynthetic process; GO:0009228,thiamine biosynthetic process; GO:0003674,molecular_function; GO:0003824,catalytic activity; GO:0016740,transferase activity; GO:0016744,transketolase or transaldolas…	PF13292.9:1-deoxy-D-xylulose-5-phosphate synthase	1.4016	1.6941	1.3087	5.6021	4.4476	5.181	23.5196	18.3195	21.0879	-1.61765	1.7e-16	2.21e-15	-3.64105	4.21e-114	1.17e-112	2.0269	3.75e-61	6.45e-60
Pcab019174	scaffold_51	1814342	1818937	+	K01662 1-deoxy-D-xylulose-5-phosphate synthase [EC:2.2.1.7] | (RefSeq) probable 1-deoxy-D-xylulose-5-phosphate synthase, chloroplastic (A)	up	down	down	ko00730: Thiamine metabolism; ko00900: Terpenoid backbone biosynthesis; ko01100: Metabolic pathways; ko01110: Biosynthesis of secondary metabolites	1-deoxy-xylulose 5-phosphate synthase, partial [Pogostemon cablin]	DXS_CAPAN RecName: Full=Probable 1-deoxy-D-xylulose-5-phosphate synthase, chloroplastic; Short=1-deoxyxylulose-5-phosphate synthase; Short=DXP synthase; Short=DXPS; EC=2.2.1.7; AltName: Full=CapTKT2; Flags: Precursor;	A0A2D0U5C7_POGCB RecName: Full=1-deoxy-D-xylulose-5-phosphate synthase {ECO:0000256|ARBA:ARBA00013150}; EC=2.2.1.7 {ECO:0000256|ARBA:ARBA00013150}; Flags: Fragment;	Transketolase	GO:0009507,chloroplast; GO:0008661,1-deoxy-D-xylulose-5-phosphate synthase activity; GO:0046872,metal ion binding; GO:0052865,1-deoxy-D-xylulose 5-phosphate biosynthetic process; GO:0016114,terpenoid biosynthetic process; GO:0009228,thiamine biosynthetic process; GO:0003674,molecular_function; GO:0003824,catalytic activity; GO:0016740,transferase activity; GO:0016744,transketolase or transaldolas…	PF13292.9:1-deoxy-D-xylulose-5-phosphate synthase	1.6738	1.5207	1.531	6.0007	5.4273	6.3693	23.6063	21.268	21.0146	-1.74044	1.61e-21	2.71e-20	-3.6066	6.06e-130	1.93e-128	1.86994	7.05e-68	1.34e-66
Pcab021062	scaffold_200	934075	937531	+	K01662 1-deoxy-D-xylulose-5-phosphate synthase [EC:2.2.1.7] | (RefSeq) probable 1-deoxy-D-xylulose-5-phosphate synthase 2, chloroplastic (A)	up	down	down	ko00730: Thiamine metabolism; ko00900: Terpenoid backbone biosynthesis; ko01100: Metabolic pathways; ko01110: Biosynthesis of secondary metabolites	hypothetical protein Pfo_003329 [Paulownia fortunei]	DXS2_ORYSJ RecName: Full=Probable 1-deoxy-D-xylulose-5-phosphate synthase 2, chloroplastic; Short=1-deoxyxylulose-5-phosphate synthase; Short=DXP synthase; Short=DXPS; EC=2.2.1.7; Flags: Precursor;	A0A6I9SLE0_SESIN RecName: Full=1-deoxy-D-xylulose-5-phosphate synthase {ECO:0000256|ARBA:ARBA00013150}; EC=2.2.1.7 {ECO:0000256|ARBA:ARBA00013150};	Transketolase	GO:0009507,chloroplast; GO:0008661,1-deoxy-D-xylulose-5-phosphate synthase activity; GO:0046872,metal ion binding; GO:0016744,transketolase or transaldolase activity; GO:0052865,1-deoxy-D-xylulose 5-phosphate biosynthetic process; GO:0016114,terpenoid biosynthetic process; GO:0009228,thiamine biosynthetic process; GO:0003674,molecular_function; GO:0003824,catalytic activity; GO:0016740,transferas…	PF13292.9:1-deoxy-D-xylulose-5-phosphate synthase	0.4997	0.1338	0.3428	1.0316	0.9031	1.3046	2.733	3.0839	2.7559	-1.55556	0.00127875	0.00432351	-2.94061	1.11e-13	4.79e-13	1.38936	5.66e-07	1.75e-06
Pcab041908	scaffold_399	73009	76163	+	K01662 1-deoxy-D-xylulose-5-phosphate synthase [EC:2.2.1.7] | (RefSeq) probable 1-deoxy-D-xylulose-5-phosphate synthase 2, chloroplastic (A)	FALSE	down	down	ko00730: Thiamine metabolism; ko00900: Terpenoid backbone biosynthesis; ko01100: Metabolic pathways; ko01110: Biosynthesis of secondary metabolites	hypothetical protein Pfo_003329 [Paulownia fortunei]	DXS2_ORYSJ RecName: Full=Probable 1-deoxy-D-xylulose-5-phosphate synthase 2, chloroplastic; Short=1-deoxyxylulose-5-phosphate synthase; Short=DXP synthase; Short=DXPS; EC=2.2.1.7; Flags: Precursor;	A0A6I9SLE0_SESIN RecName: Full=1-deoxy-D-xylulose-5-phosphate synthase {ECO:0000256|ARBA:ARBA00013150}; EC=2.2.1.7 {ECO:0000256|ARBA:ARBA00013150};	Transketolase	GO:0009507,chloroplast; GO:0008661,1-deoxy-D-xylulose-5-phosphate synthase activity; GO:0046872,metal ion binding; GO:0016744,transketolase or transaldolase activity; GO:0052865,1-deoxy-D-xylulose 5-phosphate biosynthetic process; GO:0016114,terpenoid biosynthetic process; GO:0009228,thiamine biosynthetic process; GO:0003674,molecular_function; GO:0003824,catalytic activity; GO:0016740,transferas…	PF13292.9:1-deoxy-D-xylulose-5-phosphate synthase	0.3997	0.3211	0.3701	1.4923	1.006	1.336	1.5133	2.018	1.5399	-1.64191	0.000450935	0.00168506	-2.02616	1.1e-05	2.57e-05	0.389113	0.252354	0.322824
Pcab048289	scaffold_103	1457262	1464170	+	K01662 1-deoxy-D-xylulose-5-phosphate synthase [EC:2.2.1.7] | (RefSeq) 1-deoxy-D-xylulose-5-phosphate synthase, chloroplastic (A)	up	down	FALSE	ko00730: Thiamine metabolism; ko00900: Terpenoid backbone biosynthesis; ko01100: Metabolic pathways; ko01110: Biosynthesis of secondary metabolites	putative 1-deoxy-D-xylulose 5-phosphate synthase precursor [Salvia miltiorrhiza]	DXS_CAPAN RecName: Full=Probable 1-deoxy-D-xylulose-5-phosphate synthase, chloroplastic; Short=1-deoxyxylulose-5-phosphate synthase; Short=DXP synthase; Short=DXPS; EC=2.2.1.7; AltName: Full=CapTKT2; Flags: Precursor;	H6VLG3_SALMI RecName: Full=1-deoxy-D-xylulose-5-phosphate synthase {ECO:0000256|ARBA:ARBA00013150}; EC=2.2.1.7 {ECO:0000256|ARBA:ARBA00013150};	Transketolase	GO:0009507,chloroplast; GO:0008661,1-deoxy-D-xylulose-5-phosphate synthase activity; GO:0046872,metal ion binding; GO:0052865,1-deoxy-D-xylulose 5-phosphate biosynthetic process; GO:0016114,terpenoid biosynthetic process; GO:0009228,thiamine biosynthetic process; GO:0003674,molecular_function; GO:0003824,catalytic activity; GO:0016740,transferase activity; GO:0016744,transketolase or transaldolas…	PF13292.9:1-deoxy-D-xylulose-5-phosphate synthase	0.6995	0.4943	0.2399	0.6842	0.7023	0.8413	2.5503	2.6434	2.2017	-0.457947	0.288531	0.421972	-2.16766	1.6e-10	5.67e-10	1.71471	4.76e-10	1.91e-09
Pcab064078	scaffold_385	879898	884551	+	K01662 1-deoxy-D-xylulose-5-phosphate synthase [EC:2.2.1.7] | (RefSeq) probable 1-deoxy-D-xylulose-5-phosphate synthase, chloroplastic (A)	up	down	down	ko00730: Thiamine metabolism; ko00900: Terpenoid backbone biosynthesis; ko01100: Metabolic pathways; ko01110: Biosynthesis of secondary metabolites	1-deoxy-xylulose 5-phosphate synthase, partial [Pogostemon cablin]	DXS_CAPAN RecName: Full=Probable 1-deoxy-D-xylulose-5-phosphate synthase, chloroplastic; Short=1-deoxyxylulose-5-phosphate synthase; Short=DXP synthase; Short=DXPS; EC=2.2.1.7; AltName: Full=CapTKT2; Flags: Precursor;	A0A2D0U5C7_POGCB RecName: Full=1-deoxy-D-xylulose-5-phosphate synthase {ECO:0000256|ARBA:ARBA00013150}; EC=2.2.1.7 {ECO:0000256|ARBA:ARBA00013150}; Flags: Fragment;	Transketolase	GO:0009507,chloroplast; GO:0008661,1-deoxy-D-xylulose-5-phosphate synthase activity; GO:0046872,metal ion binding; GO:0052865,1-deoxy-D-xylulose 5-phosphate biosynthetic process; GO:0016114,terpenoid biosynthetic process; GO:0009228,thiamine biosynthetic process; GO:0003674,molecular_function; GO:0003824,catalytic activity; GO:0016740,transferase activity; GO:0016744,transketolase or transaldolas…	PF13292.9:1-deoxy-D-xylulose-5-phosphate synthase	2.1024	0.9643	1.2553	6.2166	6.2568	5.305	27.4504	24.7628	23.0879	-1.86648	7.96e-18	1.11e-16	-3.92571	8.3e-37	7.67e-36	2.06306	1.27e-80	2.91e-79
Pcab075341	scaffold_857	491956	497644	+	K01662 1-deoxy-D-xylulose-5-phosphate synthase [EC:2.2.1.7] | (RefSeq) probable 1-deoxy-D-xylulose-5-phosphate synthase, chloroplastic isoform X1 (A)	up	down	FALSE	ko00730: Thiamine metabolism; ko00900: Terpenoid backbone biosynthesis; ko01100: Metabolic pathways; ko01110: Biosynthesis of secondary metabolites	putative 1-deoxy-D-xylulose 5-phosphate synthase precursor [Salvia miltiorrhiza]	DXS_CAPAN RecName: Full=Probable 1-deoxy-D-xylulose-5-phosphate synthase, chloroplastic; Short=1-deoxyxylulose-5-phosphate synthase; Short=DXP synthase; Short=DXPS; EC=2.2.1.7; AltName: Full=CapTKT2; Flags: Precursor;	H6VLG3_SALMI RecName: Full=1-deoxy-D-xylulose-5-phosphate synthase {ECO:0000256|ARBA:ARBA00013150}; EC=2.2.1.7 {ECO:0000256|ARBA:ARBA00013150};	Transketolase	GO:0009507,chloroplast; GO:0008661,1-deoxy-D-xylulose-5-phosphate synthase activity; GO:0046872,metal ion binding; GO:0052865,1-deoxy-D-xylulose 5-phosphate biosynthetic process; GO:0016114,terpenoid biosynthetic process; GO:0009228,thiamine biosynthetic process; GO:0003674,molecular_function; GO:0003824,catalytic activity; GO:0016740,transferase activity; GO:0016744,transketolase or transaldolas…	PF13292.9:1-deoxy-D-xylulose-5-phosphate synthase	0.2101	0.5979	0.6127	1.1164	1.1529	0.8363	5.0392	4.9736	4.7626	-0.961649	0.0358121	0.079	-3.18948	6.91e-23	4.36e-22	2.23161	2.32e-19	1.5e-18
Pcab114028	scaffold_848	402824	408763	-	K01662 1-deoxy-D-xylulose-5-phosphate synthase [EC:2.2.1.7] | (RefSeq) probable 1-deoxy-D-xylulose-5-phosphate synthase 2, chloroplastic (A)	up	down	FALSE	ko00730: Thiamine metabolism; ko00900: Terpenoid backbone biosynthesis; ko01100: Metabolic pathways; ko01110: Biosynthesis of secondary metabolites	1-deoxy-D-xylulose-5-phosphate synthase decarboxylase [Scutellaria barbata]	DXS2_ORYSJ RecName: Full=Probable 1-deoxy-D-xylulose-5-phosphate synthase 2, chloroplastic; Short=1-deoxyxylulose-5-phosphate synthase; Short=DXP synthase; Short=DXPS; EC=2.2.1.7; Flags: Precursor;	A0A6B7LGR1_9LAMI RecName: Full=1-deoxy-D-xylulose-5-phosphate synthase {ECO:0000256|ARBA:ARBA00013150}; EC=2.2.1.7 {ECO:0000256|ARBA:ARBA00013150};	Transketolase	GO:0009507,chloroplast; GO:0008661,1-deoxy-D-xylulose-5-phosphate synthase activity; GO:0046872,metal ion binding; GO:0016744,transketolase or transaldolase activity; GO:0052865,1-deoxy-D-xylulose 5-phosphate biosynthetic process; GO:0016114,terpenoid biosynthetic process; GO:0009228,thiamine biosynthetic process; GO:0003674,molecular_function; GO:0003824,catalytic activity; GO:0016740,transferas…	PF13292.9:1-deoxy-D-xylulose-5-phosphate synthase	3.0772	3.3475	2.6387	2.6207	2.1516	2.4219	100.506	98.4535	100.41	0.505241	0.0131205	0.0336666	-4.85132	0	0	5.35975	0	0
Pcab114029	scaffold_848	423819	431660	-	K01662 1-deoxy-D-xylulose-5-phosphate synthase [EC:2.2.1.7] | (RefSeq) probable 1-deoxy-D-xylulose-5-phosphate synthase 2, chloroplastic (A)	up	down	down	ko00730: Thiamine metabolism; ko00900: Terpenoid backbone biosynthesis; ko01100: Metabolic pathways; ko01110: Biosynthesis of secondary metabolites	1-deoxy-D-xylulose-5-phosphate synthase decarboxylase [Scutellaria barbata]	DXS2_ORYSJ RecName: Full=Probable 1-deoxy-D-xylulose-5-phosphate synthase 2, chloroplastic; Short=1-deoxyxylulose-5-phosphate synthase; Short=DXP synthase; Short=DXPS; EC=2.2.1.7; Flags: Precursor;	A0A6B7LGR1_9LAMI RecName: Full=1-deoxy-D-xylulose-5-phosphate synthase {ECO:0000256|ARBA:ARBA00013150}; EC=2.2.1.7 {ECO:0000256|ARBA:ARBA00013150};	Transketolase	GO:0009507,chloroplast; GO:0008661,1-deoxy-D-xylulose-5-phosphate synthase activity; GO:0046872,metal ion binding; GO:0016744,transketolase or transaldolase activity; GO:0052865,1-deoxy-D-xylulose 5-phosphate biosynthetic process; GO:0016114,terpenoid biosynthetic process; GO:0009228,thiamine biosynthetic process; GO:0003674,molecular_function; GO:0003824,catalytic activity; GO:0016740,transferas…	PF13292.9:1-deoxy-D-xylulose-5-phosphate synthase	0.0315	0	0.1621	1.2625	0.8541	1.5648	3.4198	3.248	4.1773	-4.09233	1.47e-08	1.06e-07	-5.63349	2.69e-18	1.44e-17	1.54307	4.21e-09	1.57e-08
Pcab123963	scaffold_2994	83377	86127	-	K01662 1-deoxy-D-xylulose-5-phosphate synthase [EC:2.2.1.7] | (RefSeq) probable 1-deoxy-D-xylulose-5-phosphate synthase 2, chloroplastic (A)	up	down	NA	ko00730: Thiamine metabolism; ko00900: Terpenoid backbone biosynthesis; ko01100: Metabolic pathways; ko01110: Biosynthesis of secondary metabolites	hypothetical protein Pfo_003329 [Paulownia fortunei]	DXS2_ORYSJ RecName: Full=Probable 1-deoxy-D-xylulose-5-phosphate synthase 2, chloroplastic; Short=1-deoxyxylulose-5-phosphate synthase; Short=DXP synthase; Short=DXPS; EC=2.2.1.7; Flags: Precursor;	A0A6I9SLE0_SESIN RecName: Full=1-deoxy-D-xylulose-5-phosphate synthase {ECO:0000256|ARBA:ARBA00013150}; EC=2.2.1.7 {ECO:0000256|ARBA:ARBA00013150};	Transketolase	GO:0009507,chloroplast; GO:0008661,1-deoxy-D-xylulose-5-phosphate synthase activity; GO:0046872,metal ion binding; GO:0016744,transketolase or transaldolase activity; GO:0052865,1-deoxy-D-xylulose 5-phosphate biosynthetic process; GO:0016114,terpenoid biosynthetic process; GO:0009228,thiamine biosynthetic process; GO:0003674,molecular_function; GO:0003824,catalytic activity; GO:0016740,transferas…	PF13292.9:1-deoxy-D-xylulose-5-phosphate synthase	0.2972	0.4477	0.497	1.0151	0.4676	0.5323	2.5321	2.6966	2.3156	NA	NA	NA	-2.41241	6.76e-10	2.29e-09	1.88129	8.53e-08	2.85e-07
Pcab124711	scaffold_1395	314670	319826	-	K01662 1-deoxy-D-xylulose-5-phosphate synthase [EC:2.2.1.7] | (RefSeq) probable 1-deoxy-D-xylulose-5-phosphate synthase 2, chloroplastic (A)	up	down	FALSE	ko00730: Thiamine metabolism; ko00900: Terpenoid backbone biosynthesis; ko01100: Metabolic pathways; ko01110: Biosynthesis of secondary metabolites	1-deoxy-D-xylulose-5-phosphate synthase decarboxylase [Scutellaria barbata]	DXS2_ORYSJ RecName: Full=Probable 1-deoxy-D-xylulose-5-phosphate synthase 2, chloroplastic; Short=1-deoxyxylulose-5-phosphate synthase; Short=DXP synthase; Short=DXPS; EC=2.2.1.7; Flags: Precursor;	A0A6B7LGR1_9LAMI RecName: Full=1-deoxy-D-xylulose-5-phosphate synthase {ECO:0000256|ARBA:ARBA00013150}; EC=2.2.1.7 {ECO:0000256|ARBA:ARBA00013150};	Transketolase	GO:0009507,chloroplast; GO:0008661,1-deoxy-D-xylulose-5-phosphate synthase activity; GO:0046872,metal ion binding; GO:0016744,transketolase or transaldolase activity; GO:0052865,1-deoxy-D-xylulose 5-phosphate biosynthetic process; GO:0016114,terpenoid biosynthetic process; GO:0009228,thiamine biosynthetic process; GO:0003674,molecular_function; GO:0003824,catalytic activity; GO:0016740,transferas…	PF13292.9:1-deoxy-D-xylulose-5-phosphate synthase	3.1804	3.7212	4.2402	2.166	2.008	2.747	109.56	108.448	104.7	0.858455	1.54e-05	7.55e-05	-4.66455	0	0	5.52656	0	0
Pcab128568	scaffold_1758	66930	69585	-	K01662 1-deoxy-D-xylulose-5-phosphate synthase [EC:2.2.1.7] | (RefSeq) probable 1-deoxy-D-xylulose-5-phosphate synthase 2, chloroplastic (A)	up	down	FALSE	ko00730: Thiamine metabolism; ko00900: Terpenoid backbone biosynthesis; ko01100: Metabolic pathways; ko01110: Biosynthesis of secondary metabolites	1-deoxy-D-xylulose-5-phosphate synthase [Isodon rubescens]	DXS2_ORYSJ RecName: Full=Probable 1-deoxy-D-xylulose-5-phosphate synthase 2, chloroplastic; Short=1-deoxyxylulose-5-phosphate synthase; Short=DXP synthase; Short=DXPS; EC=2.2.1.7; Flags: Precursor;	A0A140GBF5_ISORU RecName: Full=1-deoxy-D-xylulose-5-phosphate synthase {ECO:0000256|ARBA:ARBA00013150}; EC=2.2.1.7 {ECO:0000256|ARBA:ARBA00013150};	Transketolase	GO:0009507,chloroplast; GO:0008661,1-deoxy-D-xylulose-5-phosphate synthase activity; GO:0046872,metal ion binding; GO:0016744,transketolase or transaldolase activity; GO:0052865,1-deoxy-D-xylulose 5-phosphate biosynthetic process; GO:0016114,terpenoid biosynthetic process; GO:0009228,thiamine biosynthetic process; GO:0003674,molecular_function; GO:0003824,catalytic activity; GO:0016740,transferas…	PF13292.9:1-deoxy-D-xylulose-5-phosphate synthase	16.5867	15.2509	15.1349	12.0115	13.0397	13.9713	237.53	229.84	219.429	0.440652	5.53e-05	0.000246848	-3.67587	0	0	4.12104	0	0
Pcab128569	scaffold_1758	104291	109353	-	K01662 1-deoxy-D-xylulose-5-phosphate synthase [EC:2.2.1.7] | (RefSeq) probable 1-deoxy-D-xylulose-5-phosphate synthase 2, chloroplastic (A)	FALSE	down	down	ko00730: Thiamine metabolism; ko00900: Terpenoid backbone biosynthesis; ko01100: Metabolic pathways; ko01110: Biosynthesis of secondary metabolites	1-deoxy-D-xylulose-5-phosphate synthase decarboxylase [Scutellaria barbata]	DXS2_ORYSJ RecName: Full=Probable 1-deoxy-D-xylulose-5-phosphate synthase 2, chloroplastic; Short=1-deoxyxylulose-5-phosphate synthase; Short=DXP synthase; Short=DXPS; EC=2.2.1.7; Flags: Precursor;	A0A6B7LGR1_9LAMI RecName: Full=1-deoxy-D-xylulose-5-phosphate synthase {ECO:0000256|ARBA:ARBA00013150}; EC=2.2.1.7 {ECO:0000256|ARBA:ARBA00013150};	Transketolase	GO:0009507,chloroplast; GO:0008661,1-deoxy-D-xylulose-5-phosphate synthase activity; GO:0046872,metal ion binding; GO:0016744,transketolase or transaldolase activity; GO:0052865,1-deoxy-D-xylulose 5-phosphate biosynthetic process; GO:0016114,terpenoid biosynthetic process; GO:0009228,thiamine biosynthetic process; GO:0003674,molecular_function; GO:0003824,catalytic activity; GO:0016740,transferas…	PF13292.9:1-deoxy-D-xylulose-5-phosphate synthase	0.0362	0.0728	0.0373	2.1774	3.3318	2.4566	3.0175	2.9723	2.8735	-5.59333	8.2e-13	8.52e-12	-5.72577	2.04e-13	8.64e-13	0.137169	0.574267	0.644862
Pcab133592	scaffold_3263	49265	52998	+	K01662 1-deoxy-D-xylulose-5-phosphate synthase [EC:2.2.1.7] | (RefSeq) probable 1-deoxy-D-xylulose-5-phosphate synthase, chloroplastic (A)	up	down	down	ko00730: Thiamine metabolism; ko00900: Terpenoid backbone biosynthesis; ko01100: Metabolic pathways; ko01110: Biosynthesis of secondary metabolites	1-deoxy-xylulose 5-phosphate synthase, partial [Pogostemon cablin]	DXS_CAPAN RecName: Full=Probable 1-deoxy-D-xylulose-5-phosphate synthase, chloroplastic; Short=1-deoxyxylulose-5-phosphate synthase; Short=DXP synthase; Short=DXPS; EC=2.2.1.7; AltName: Full=CapTKT2; Flags: Precursor;	A0A2D0U5C7_POGCB RecName: Full=1-deoxy-D-xylulose-5-phosphate synthase {ECO:0000256|ARBA:ARBA00013150}; EC=2.2.1.7 {ECO:0000256|ARBA:ARBA00013150}; Flags: Fragment;	Transketolase	GO:0009507,chloroplast; GO:0008661,1-deoxy-D-xylulose-5-phosphate synthase activity; GO:0046872,metal ion binding; GO:0052865,1-deoxy-D-xylulose 5-phosphate biosynthetic process; GO:0016114,terpenoid biosynthetic process; GO:0009228,thiamine biosynthetic process; GO:0003674,molecular_function; GO:0003824,catalytic activity; GO:0016740,transferase activity; GO:0016744,transketolase or transaldolas…	PF13292.9:1-deoxy-D-xylulose-5-phosphate synthase	2.8379	2.7897	2.6436	8.7873	5.6106	6.9046	20.9243	20.4249	19.3965	-1.19325	6.69e-11	6.04e-10	-2.68246	1.71e-87	3.54e-86	1.49277	3.29e-30	3.03e-29
Pcab140866	scaffold_5205	8999	18266	-	K01662 1-deoxy-D-xylulose-5-phosphate synthase [EC:2.2.1.7] | (RefSeq) probable 1-deoxy-D-xylulose-5-phosphate synthase 2, chloroplastic (A)	up	down	FALSE	ko00730: Thiamine metabolism; ko00900: Terpenoid backbone biosynthesis; ko01100: Metabolic pathways; ko01110: Biosynthesis of secondary metabolites	1-deoxy-D-xylulose-5-phosphate synthase decarboxylase [Scutellaria barbata]	DXS2_ORYSJ RecName: Full=Probable 1-deoxy-D-xylulose-5-phosphate synthase 2, chloroplastic; Short=1-deoxyxylulose-5-phosphate synthase; Short=DXP synthase; Short=DXPS; EC=2.2.1.7; Flags: Precursor;	A0A6B7LGR1_9LAMI RecName: Full=1-deoxy-D-xylulose-5-phosphate synthase {ECO:0000256|ARBA:ARBA00013150}; EC=2.2.1.7 {ECO:0000256|ARBA:ARBA00013150};	Transketolase	GO:0009507,chloroplast; GO:0008661,1-deoxy-D-xylulose-5-phosphate synthase activity; GO:0046872,metal ion binding; GO:0016744,transketolase or transaldolase activity; GO:0052865,1-deoxy-D-xylulose 5-phosphate biosynthetic process; GO:0016114,terpenoid biosynthetic process; GO:0009228,thiamine biosynthetic process; GO:0003674,molecular_function; GO:0003824,catalytic activity; GO:0016740,transferas…	PF13292.9:1-deoxy-D-xylulose-5-phosphate synthase	15.5615	17.7312	14.4366	13.8781	10.9283	12.3213	102.879	96.432	89.5385	0.533846	0.000635712	0.00229701	-2.40255	1.71e-110	4.57e-109	2.93985	2.23e-157	1.08e-155

## Sheet: Key DEG flavonoid
ID	chr	start	end	strand	KEGG	Leaf_vs_Stem.regulated	Root_vs_Leaf.regulated	Root_vs_Stem.regulated	KEGG pathway	NR	Swissprot	Tremble	KOG	GO	Pfam	Root-1_fpkm	Root-2_fpkm	Root-3_fpkm	Stem-1_fpkm	Stem-2_fpkm	Stem-3_fpkm	Leaf-1_fpkm	Leaf-2_fpkm	Leaf-3_fpkm	Root_vs_Stem.log2FoldChange	Root_vs_Stem.pvalue	Root_vs_Stem.padj	Root_vs_Leaf.log2FoldChange	Root_vs_Leaf.pvalue	Root_vs_Leaf.padj	Leaf_vs_Stem.log2FoldChange	Leaf_vs_Stem.pvalue	Leaf_vs_Stem.padj
eriodictyol	luteolin	dihydroquercetin	quercetin	EC:1.14.14.82 flavonoid 3'-monooxygenase
Pcab073450	scaffold_169_1_501434	367108	369992	+	K05280 flavonoid 3'-monooxygenase [EC:1.14.14.82] | (RefSeq) flavonoid 3'-monooxygenase (A)	FALSE	up	up	ko00941: Flavonoid biosynthesis; ko00944: Flavone and flavonol biosynthesis; ko01100: Metabolic pathways; ko01110: Biosynthesis of secondary metabolites	flavonoid 3'-hydroxylase [Trifolium pratense]	F3PH_PETHY RecName: Full=Flavonoid 3'-monooxygenase; EC=1.14.14.82; AltName: Full=Cytochrome P450 75B2; AltName: Full=Flavonoid 3'-hydroxylase;	A0A2K3JPY8_TRIPR SubName: Full=Flavonoid 3'-hydroxylase {ECO:0000313|EMBL:PNX56102.1};	Cytochrome P450 CYP2 subfamily	GO:0005789,endoplasmic reticulum membrane; GO:0016021,integral component of membrane; GO:0016711,flavonoid 3'-monooxygenase activity; GO:0020037,heme binding; GO:0005506,iron ion binding; GO:0009813,flavonoid biosynthetic process; GO:0003674,molecular_function; GO:0003824,catalytic activity; GO:0004497,monooxygenase activity; GO:0016491,oxidoreductase activity; GO:0016705,oxidoreductase activity,…	PF00067.25:Cytochrome P450	9.6254	8.9405	9.2856	3.6159	3.2615	3.5623	2.4296	1.139	2.5904	1.58727	5.91e-09	4.45e-08	2.38441	1.01e-11	3.86e-11	-0.788236	0.0753057	0.111656
Pcab102348	scaffold_76_1_597231	184932	186364	-	K05280 flavonoid 3'-monooxygenase [EC:1.14.14.82] | (RefSeq) flavonoid 3'-monooxygenase-like (A)	down	up	FALSE	ko00941: Flavonoid biosynthesis; ko00944: Flavone and flavonol biosynthesis; ko01100: Metabolic pathways; ko01110: Biosynthesis of secondary metabolites	hypothetical protein Pfo_014850, partial [Paulownia fortunei]	C80B3_PAPSO RecName: Full=(S)-N-methylcoclaurine 3'-hydroxylase isozyme 1 {ECO:0000305}; EC=1.14.14.102 {ECO:0000250|UniProtKB:O64899}; AltName: Full=Cytochrome P450 80B1 {ECO:0000303|PubMed:15849302}; AltName: Full=Cytochrome P450 80B3 {ECO:0000303|PubMed:17189709}; Flags: Fragment;	A0A022RAE4_ERYGU SubName: Full=Uncharacterized protein {ECO:0000313|EMBL:EYU37231.1};	Cytochrome P450 CYP2 subfamily	GO:0005783,endoplasmic reticulum; GO:0020037,heme binding; GO:0005506,iron ion binding; GO:0050593,N-methylcoclaurine 3'-monooxygenase activity; GO:1901012,(S)-reticuline biosynthetic process; GO:0002238,response to molecule of fungal origin; GO:0003674,molecular_function; GO:0005488,binding; GO:0046906,tetrapyrrole binding; GO:0097159,organic cyclic compound binding; GO:1901363,heterocyclic comp…	PF00067.25:Cytochrome P450	4.2893	2.5249	5.9357	3.7715	3.2934	2.9665	0	0.1556	0.838	0.514299	0.204373	0.32468	3.84624	8.59e-07	2.24e-06	-3.32674	2.64e-05	6.81e-05
Pcab003633	scaffold_24	2962997	2974492	-	K05280 flavonoid 3'-monooxygenase [EC:1.14.14.82] | (RefSeq) flavonoid 3'-monooxygenase (A)	up	down	FALSE	ko00941: Flavonoid biosynthesis; ko00944: Flavone and flavonol biosynthesis; ko01100: Metabolic pathways; ko01110: Biosynthesis of secondary metabolites	cytochrome P450 CYP75B79 [Salvia miltiorrhiza]	F3PH_PETHY RecName: Full=Flavonoid 3'-monooxygenase; EC=1.14.14.82; AltName: Full=Cytochrome P450 75B2; AltName: Full=Flavonoid 3'-hydroxylase;	A0A0B4VRW0_SALMI SubName: Full=Cytochrome P450 CYP75B79 {ECO:0000313|EMBL:AJD25177.1};	Cytochrome P450 CYP2 subfamily	GO:0005789,endoplasmic reticulum membrane; GO:0016021,integral component of membrane; GO:0016711,flavonoid 3'-monooxygenase activity; GO:0020037,heme binding; GO:0005506,iron ion binding; GO:0009813,flavonoid biosynthetic process; GO:0003674,molecular_function; GO:0003824,catalytic activity; GO:0004497,monooxygenase activity; GO:0016491,oxidoreductase activity; GO:0016705,oxidoreductase activity,…	PF00067.25:Cytochrome P450	1.5489	1.5553	1.5559	1.0411	0.8926	0.8101	12.2874	12.4135	11.6174	0.934441	0.00504911	0.014658	-2.76895	2.23e-47	2.56e-46	3.70661	1.51e-66	2.82e-65
Pcab008744	scaffold_47	804581	817567	+	K05280 flavonoid 3'-monooxygenase [EC:1.14.14.82] | (RefSeq) flavonoid 3'-monooxygenase (A)	up	down	FALSE	ko00941: Flavonoid biosynthesis; ko00944: Flavone and flavonol biosynthesis; ko01100: Metabolic pathways; ko01110: Biosynthesis of secondary metabolites	hypothetical protein BUALT_Bualt02G0155900 [Buddleja alternifolia]	F3PH_PETHY RecName: Full=Flavonoid 3'-monooxygenase; EC=1.14.14.82; AltName: Full=Cytochrome P450 75B2; AltName: Full=Flavonoid 3'-hydroxylase;	A0A0B4VRW0_SALMI SubName: Full=Cytochrome P450 CYP75B79 {ECO:0000313|EMBL:AJD25177.1};	Cytochrome P450 CYP2 subfamily	GO:0005789,endoplasmic reticulum membrane; GO:0016021,integral component of membrane; GO:0016711,flavonoid 3'-monooxygenase activity; GO:0020037,heme binding; GO:0005506,iron ion binding; GO:0009813,flavonoid biosynthetic process; GO:0003674,molecular_function; GO:0003824,catalytic activity; GO:0004497,monooxygenase activity; GO:0016491,oxidoreductase activity; GO:0016705,oxidoreductase activity,…	PF00067.25:Cytochrome P450	0.6437	0.3092	0.6624	0.4078	0.7587	0.294	2.508	2.9146	2.8227	0.316247	0.52473	0.65331	-2.16144	2.45e-11	9.17e-11	2.48388	3.07e-14	1.59e-13
Pcab073453	scaffold_169_1_501434	380638	391376	+	K05280 flavonoid 3'-monooxygenase [EC:1.14.14.82] | (RefSeq) flavonoid 3'-monooxygenase (A)	up	down	down	ko00941: Flavonoid biosynthesis; ko00944: Flavone and flavonol biosynthesis; ko01100: Metabolic pathways; ko01110: Biosynthesis of secondary metabolites	cytochrome P450 CYP75B79 [Salvia miltiorrhiza]	F3PH_PETHY RecName: Full=Flavonoid 3'-monooxygenase; EC=1.14.14.82; AltName: Full=Cytochrome P450 75B2; AltName: Full=Flavonoid 3'-hydroxylase;	A0A0B4VRW0_SALMI SubName: Full=Cytochrome P450 CYP75B79 {ECO:0000313|EMBL:AJD25177.1};	Cytochrome P450 CYP2 subfamily	GO:0005789,endoplasmic reticulum membrane; GO:0016021,integral component of membrane; GO:0016711,flavonoid 3'-monooxygenase activity; GO:0020037,heme binding; GO:0005506,iron ion binding; GO:0009813,flavonoid biosynthetic process; GO:0003674,molecular_function; GO:0003824,catalytic activity; GO:0004497,monooxygenase activity; GO:0016491,oxidoreductase activity; GO:0016705,oxidoreductase activity,…	PF00067.25:Cytochrome P450	2.8247	2.0698	2.1604	6.0488	7.0954	5.1405	28.2789	27.3839	29.2835	-1.20142	1.29e-08	9.4e-08	-3.39543	9.05e-111	2.43e-109	2.19866	2.85e-70	5.65e-69
Pcab096955	scaffold_2143	127482	130434	+	K05280 flavonoid 3'-monooxygenase [EC:1.14.14.82] | (RefSeq) flavonoid 3'-monooxygenase (A)	up	down	FALSE	ko00941: Flavonoid biosynthesis; ko00944: Flavone and flavonol biosynthesis; ko01100: Metabolic pathways; ko01110: Biosynthesis of secondary metabolites	hypothetical protein Pfo_020573 [Paulownia fortunei]	F3PH_PETHY RecName: Full=Flavonoid 3'-monooxygenase; EC=1.14.14.82; AltName: Full=Cytochrome P450 75B2; AltName: Full=Flavonoid 3'-hydroxylase;	A0A2Z4N9A5_SALMI SubName: Full=Flavonoid 3'-hydroxylase 2 {ECO:0000313|EMBL:AWX67423.1}; EC=1.14.14.82 {ECO:0000313|EMBL:AWX67423.1};	Cytochrome P450 CYP2 subfamily	GO:0005789,endoplasmic reticulum membrane; GO:0016021,integral component of membrane; GO:0016711,flavonoid 3'-monooxygenase activity; GO:0020037,heme binding; GO:0005506,iron ion binding; GO:0009813,flavonoid biosynthetic process; GO:0003674,molecular_function; GO:0003824,catalytic activity; GO:0004497,monooxygenase activity; GO:0016491,oxidoreductase activity; GO:0016705,oxidoreductase activity,…	PF00067.25:Cytochrome P450	0.2957	0.4242	0.3912	0.4617	1.1043	0.6456	5.1184	4.3994	3.8297	-0.820904	0.149704	0.254586	-3.39154	6.09e-19	3.35e-18	2.57883	8.77e-16	4.88e-15
Pcab116438	scaffold_2775	35080	38233	+	K05280 flavonoid 3'-monooxygenase [EC:1.14.14.82] | (RefSeq) flavonoid 3'-monooxygenase (A)	up	down	NA	ko00941: Flavonoid biosynthesis; ko00944: Flavone and flavonol biosynthesis; ko01100: Metabolic pathways; ko01110: Biosynthesis of secondary metabolites	hypothetical protein Pfo_020573 [Paulownia fortunei]	F3PH_PETHY RecName: Full=Flavonoid 3'-monooxygenase; EC=1.14.14.82; AltName: Full=Cytochrome P450 75B2; AltName: Full=Flavonoid 3'-hydroxylase;	A0A2Z4N9A5_SALMI SubName: Full=Flavonoid 3'-hydroxylase 2 {ECO:0000313|EMBL:AWX67423.1}; EC=1.14.14.82 {ECO:0000313|EMBL:AWX67423.1};	Cytochrome P450 CYP2 subfamily	GO:0005789,endoplasmic reticulum membrane; GO:0016021,integral component of membrane; GO:0016711,flavonoid 3'-monooxygenase activity; GO:0020037,heme binding; GO:0005506,iron ion binding; GO:0009813,flavonoid biosynthetic process; GO:0003674,molecular_function; GO:0003824,catalytic activity; GO:0004497,monooxygenase activity; GO:0016491,oxidoreductase activity; GO:0016705,oxidoreductase activity,…	PF00067.25:Cytochrome P450	0.082	0.2057	0.0843	0.5225	0.5554	0.5479	4.8097	2.7587	4.8293	NA	NA	NA	-4.86052	1.05e-17	5.48e-17	2.91108	7.89e-17	4.61e-16
quercetin	kaempferol	EC:1.14.20.6 flavonol synthase
Pcab021697	scaffold_90	96918	97632	-	K05278 flavonol synthase [EC:1.14.20.6] | (RefSeq) LOW QUALITY PROTEIN: flavonol synthase/flavanone 3-hydroxylase-like (A)	up	FALSE	NA	ko00941: Flavonoid biosynthesis; ko01100: Metabolic pathways; ko01110: Biosynthesis of secondary metabolites	protein SRG1-like [Salvia splendens]	JOX2_ARATH RecName: Full=Jasmonate-induced oxygenase 2 {ECO:0000303|PubMed:28559313}; EC=1.14.11.- {ECO:0000269|PubMed:28559313, ECO:0000269|PubMed:28760569, ECO:0000269|PubMed:33516967}; AltName: Full=2-oxoglutarate-dependent dioxygenase JOX2 {ECO:0000305}; AltName: Full=Jasmonic acid oxidase 2 {ECO:0000303|PubMed:28760569};	A0A4D9AQC3_SALSN RecName: Full=Fe2OG dioxygenase domain-containing protein {ECO:0000259|PROSITE:PS51471};	Iron/ascorbate family oxidoreductases	GO:0005829,cytosol; GO:0051213,dioxygenase activity; GO:0005506,iron ion binding; GO:0120091,jasmonic acid hydrolase; GO:0097237,cellular response to toxic substance; GO:0006952,defense response; GO:1900366,negative regulation of defense response to insect; GO:1900150,regulation of defense response to fungus; GO:2000022,regulation of jasmonic acid mediated signaling pathway; GO:0003674,molecular_…	PF03171.23:2OG-Fe(II) oxygenase superfamily	1.5287	1.535	1.3483	0.7955	0.8457	1.5643	2.8939	2.7565	3.5882	NA	NA	NA	-0.873413	0.0596279	0.0839584	1.51489	0.00218481	0.00435857
Pcab052062	scaffold_171	751949	755550	+	K05278 flavonol synthase [EC:1.14.20.6] | (RefSeq) flavonol synthase/flavanone 3-hydroxylase (A)	down	up	FALSE	ko00941: Flavonoid biosynthesis; ko01100: Metabolic pathways; ko01110: Biosynthesis of secondary metabolites	2-oxoglutarate-dependent dioxygenase 11-like [Salvia splendens]	FLS_PETHY RecName: Full=Flavonol synthase/flavanone 3-hydroxylase; Short=FLS; EC=1.14.11.9 {ECO:0000250|UniProtKB:Q7XZQ6}; EC=1.14.20.6 {ECO:0000250|UniProtKB:Q7XZQ6};	A0A4D8ZPD6_SALSN RecName: Full=Fe2OG dioxygenase domain-containing protein {ECO:0000259|PROSITE:PS51471};	Iron/ascorbate family oxidoreductases	GO:0005737,cytoplasm; GO:0045431,flavonol synthase activity; GO:0031418,L-ascorbic acid binding; GO:0046872,metal ion binding; GO:0045486,naringenin 3-dioxygenase activity; GO:0009805,coumarin biosynthetic process; GO:0002238,response to molecule of fungal origin; GO:0003674,molecular_function; GO:0003824,catalytic activity; GO:0016491,oxidoreductase activity; GO:0016705,oxidoreductase activity, …	PF03171.23:2OG-Fe(II) oxygenase superfamily	8.744	7.7405	8.1689	14.4069	13.8673	12.362	2.6862	4.0542	3.5852	-0.549457	0.000213271	0.000851727	1.44039	1.15e-10	4.11e-10	-1.98425	8.62e-24	6.56e-23
Pcab103235	scaffold_1893	141685	143462	-	K05278 flavonol synthase [EC:1.14.20.6] | (RefSeq) flavonol synthase/flavanone 3-hydroxylase-like (A)	FALSE	up	FALSE	ko00941: Flavonoid biosynthesis; ko01100: Metabolic pathways; ko01110: Biosynthesis of secondary metabolites	hypothetical protein Pfo_003514 [Paulownia fortunei]	JOX4_ARATH RecName: Full=Jasmonate-induced oxygenase 4 {ECO:0000303|PubMed:28559313}; EC=1.14.11.- {ECO:0000269|PubMed:28559313, ECO:0000269|PubMed:28760569}; AltName: Full=2-oxoglutarate-dependent dioxygenase JOX4 {ECO:0000305}; AltName: Full=Anthocyanidin synthase {ECO:0000305}; AltName: Full=Jasmonic acid oxidase 4 {ECO:0000303|PubMed:28760569};	A0A830CPL6_9LAMI SubName: Full=Protein srg1 {ECO:0000313|EMBL:GFQ01781.1};	Iron/ascorbate family oxidoreductases	GO:0005829,cytosol; GO:0051213,dioxygenase activity; GO:0005506,iron ion binding; GO:0120091,jasmonic acid hydrolase; GO:0006952,defense response; GO:1900366,negative regulation of defense response to insect; GO:1900150,regulation of defense response to fungus; GO:2000022,regulation of jasmonic acid mediated signaling pathway; GO:0003674,molecular_function; GO:0003824,catalytic activity; GO:00164…	PF14226.9:non-haem dioxygenase in morphine synthesis N-terminal	2.5883	2.9308	3.6834	1.8055	1.6528	2.998	2.0851	1.1585	1.2481	0.683853	0.0249275	0.0581838	1.23962	0.00036328	0.000713189	-0.549744	0.155529	0.211958
Pcab130934	scaffold_3062	41098	43668	+	K05278 flavonol synthase [EC:1.14.20.6] | (RefSeq) flavonol synthase/flavanone 3-hydroxylase-like (A)	down	FALSE	FALSE	ko00941: Flavonoid biosynthesis; ko01100: Metabolic pathways; ko01110: Biosynthesis of secondary metabolites	protein SRG1-like [Salvia splendens]	JOX2_ARATH RecName: Full=Jasmonate-induced oxygenase 2 {ECO:0000303|PubMed:28559313}; EC=1.14.11.- {ECO:0000269|PubMed:28559313, ECO:0000269|PubMed:28760569, ECO:0000269|PubMed:33516967}; AltName: Full=2-oxoglutarate-dependent dioxygenase JOX2 {ECO:0000305}; AltName: Full=Jasmonic acid oxidase 2 {ECO:0000303|PubMed:28760569};	A0A4D9AQC3_SALSN RecName: Full=Fe2OG dioxygenase domain-containing protein {ECO:0000259|PROSITE:PS51471};	Iron/ascorbate family oxidoreductases	GO:0005829,cytosol; GO:0051213,dioxygenase activity; GO:0005506,iron ion binding; GO:0120091,jasmonic acid hydrolase; GO:0097237,cellular response to toxic substance; GO:0006952,defense response; GO:1900366,negative regulation of defense response to insect; GO:1900150,regulation of defense response to fungus; GO:2000022,regulation of jasmonic acid mediated signaling pathway; GO:0003674,molecular_…	PF14226.9:non-haem dioxygenase in morphine synthesis N-terminal	24.5583	27.4484	22.5405	47.9332	50.5972	45.2016	22.4278	25.2482	22.0948	-0.775009	4.89e-16	6.21e-15	0.287777	0.017247	0.0268054	-1.05849	4.29e-25	3.41e-24
Pcab130935	scaffold_3062	52658	54577	+	K05278 flavonol synthase [EC:1.14.20.6] | (RefSeq) flavonol synthase/flavanone 3-hydroxylase (A)	up	FALSE	up	ko00941: Flavonoid biosynthesis; ko01100: Metabolic pathways; ko01110: Biosynthesis of secondary metabolites	protein srg1 [Phtheirospermum japonicum]	JOX4_ARATH RecName: Full=Jasmonate-induced oxygenase 4 {ECO:0000303|PubMed:28559313}; EC=1.14.11.- {ECO:0000269|PubMed:28559313, ECO:0000269|PubMed:28760569}; AltName: Full=2-oxoglutarate-dependent dioxygenase JOX4 {ECO:0000305}; AltName: Full=Anthocyanidin synthase {ECO:0000305}; AltName: Full=Jasmonic acid oxidase 4 {ECO:0000303|PubMed:28760569};	A0A830CPL6_9LAMI SubName: Full=Protein srg1 {ECO:0000313|EMBL:GFQ01781.1};	Iron/ascorbate family oxidoreductases	GO:0005829,cytosol; GO:0051213,dioxygenase activity; GO:0005506,iron ion binding; GO:0120091,jasmonic acid hydrolase; GO:0006952,defense response; GO:1900366,negative regulation of defense response to insect; GO:1900150,regulation of defense response to fungus; GO:2000022,regulation of jasmonic acid mediated signaling pathway; GO:0003674,molecular_function; GO:0003824,catalytic activity; GO:00164…	PF14226.9:non-haem dioxygenase in morphine synthesis N-terminal	16.4059	17.4576	20.6614	5.4634	6.045	6.8991	12.8249	9.2725	16.0932	1.73888	9.27e-17	1.22e-15	0.70718	0.00104988	0.00194619	1.03636	7.46e-05	0.000182436
Pcab130936	scaffold_3062	55108	56022	+	K05278 flavonol synthase [EC:1.14.20.6] | (RefSeq) flavonol synthase/flavanone 3-hydroxylase-like (A)	up	FALSE	up	ko00941: Flavonoid biosynthesis; ko01100: Metabolic pathways; ko01110: Biosynthesis of secondary metabolites	protein srg1 [Phtheirospermum japonicum]	DIOX2_PAPSO RecName: Full=Probable 2-oxoglutarate/Fe(II)-dependent dioxygenase; EC=1.14.11.-;	A0A830CPL6_9LAMI SubName: Full=Protein srg1 {ECO:0000313|EMBL:GFQ01781.1};	Iron/ascorbate family oxidoreductases	GO:0051213,dioxygenase activity; GO:0046872,metal ion binding; GO:0016740,transferase activity; GO:0003674,molecular_function; GO:0003824,catalytic activity; GO:0016491,oxidoreductase activity; GO:0005488,binding; GO:0043167,ion binding; GO:0043169,cation binding	PF03171.23:2OG-Fe(II) oxygenase superfamily	17.2619	20.305	14.8445	3.7055	4.1779	4.7105	7.9361	13.229	11.7362	2.23156	2.1e-21	3.51e-20	0.857292	0.000122881	0.000254929	1.37634	1.67e-06	4.93e-06
Pcab020488	scaffold_30_551985_3761310	1782272	1784939	-	K05278 flavonol synthase [EC:1.14.20.6] | (RefSeq) flavonol synthase/flavanone 3-hydroxylase (A)	up	down	down	ko00941: Flavonoid biosynthesis; ko01100: Metabolic pathways; ko01110: Biosynthesis of secondary metabolites	hypothetical protein Pfo_003514 [Paulownia fortunei]	JOX4_ARATH RecName: Full=Jasmonate-induced oxygenase 4 {ECO:0000303|PubMed:28559313}; EC=1.14.11.- {ECO:0000269|PubMed:28559313, ECO:0000269|PubMed:28760569}; AltName: Full=2-oxoglutarate-dependent dioxygenase JOX4 {ECO:0000305}; AltName: Full=Anthocyanidin synthase {ECO:0000305}; AltName: Full=Jasmonic acid oxidase 4 {ECO:0000303|PubMed:28760569};	A0A830CPL6_9LAMI SubName: Full=Protein srg1 {ECO:0000313|EMBL:GFQ01781.1};	Iron/ascorbate family oxidoreductases	GO:0005829,cytosol; GO:0051213,dioxygenase activity; GO:0005506,iron ion binding; GO:0120091,jasmonic acid hydrolase; GO:0006952,defense response; GO:1900366,negative regulation of defense response to insect; GO:1900150,regulation of defense response to fungus; GO:2000022,regulation of jasmonic acid mediated signaling pathway; GO:0003674,molecular_function; GO:0003824,catalytic activity; GO:00164…	PF14226.9:non-haem dioxygenase in morphine synthesis N-terminal	0.3549	0.3055	0.2609	5.6332	5.4485	7.409	116.843	122.29	116.514	-4.15192	3.23e-24	6.05e-23	-8.39764	6.57e-129	2.07e-127	4.25004	0	0
Pcab020659	scaffold_125	137769	139853	+	K05278 flavonol synthase [EC:1.14.20.6] | (RefSeq) flavonol synthase/flavanone 3-hydroxylase (A)	FALSE	down	down	ko00941: Flavonoid biosynthesis; ko01100: Metabolic pathways; ko01110: Biosynthesis of secondary metabolites	hypothetical protein Pfo_021144 [Paulownia fortunei]	FLS_PETHY RecName: Full=Flavonol synthase/flavanone 3-hydroxylase; Short=FLS; EC=1.14.11.9 {ECO:0000250|UniProtKB:Q7XZQ6}; EC=1.14.20.6 {ECO:0000250|UniProtKB:Q7XZQ6};	A0A2G9H1G9_9LAMI SubName: Full=Iron/ascorbate family oxidoreductase {ECO:0000313|EMBL:PIN11382.1}; EC=1.14.11.23 {ECO:0000313|EMBL:PIN11382.1};	Iron/ascorbate family oxidoreductases	GO:0005737,cytoplasm; GO:0045431,flavonol synthase activity; GO:0031418,L-ascorbic acid binding; GO:0046872,metal ion binding; GO:0045486,naringenin 3-dioxygenase activity; GO:0009805,coumarin biosynthetic process; GO:0002238,response to molecule of fungal origin; GO:0003674,molecular_function; GO:0003824,catalytic activity; GO:0016491,oxidoreductase activity; GO:0016705,oxidoreductase activity, …	PF03171.23:2OG-Fe(II) oxygenase superfamily	1.0555	0.9154	1.8267	7.5589	7.153	5.3155	11.6258	11.3046	11.9062	-2.23237	3.54e-16	4.53e-15	-3.00872	2.36e-35	2.11e-34	0.779829	2.57e-06	7.41e-06
Pcab039414	scaffold_185	454461	456264	+	K05278 flavonol synthase [EC:1.14.20.6] | (RefSeq) flavonol synthase/flavanone 3-hydroxylase (A)	FALSE	down	FALSE	ko00941: Flavonoid biosynthesis; ko01100: Metabolic pathways; ko01110: Biosynthesis of secondary metabolites	jasmonate-induced oxygenase 4 [Salvia hispanica]	JOX4_ARATH RecName: Full=Jasmonate-induced oxygenase 4 {ECO:0000303|PubMed:28559313}; EC=1.14.11.- {ECO:0000269|PubMed:28559313, ECO:0000269|PubMed:28760569}; AltName: Full=2-oxoglutarate-dependent dioxygenase JOX4 {ECO:0000305}; AltName: Full=Anthocyanidin synthase {ECO:0000305}; AltName: Full=Jasmonic acid oxidase 4 {ECO:0000303|PubMed:28760569};	A0A4D9ADC5_SALSN RecName: Full=Fe2OG dioxygenase domain-containing protein {ECO:0000259|PROSITE:PS51471};	Iron/ascorbate family oxidoreductases	GO:0005829,cytosol; GO:0051213,dioxygenase activity; GO:0005506,iron ion binding; GO:0120091,jasmonic acid hydrolase; GO:0006952,defense response; GO:1900366,negative regulation of defense response to insect; GO:1900150,regulation of defense response to fungus; GO:2000022,regulation of jasmonic acid mediated signaling pathway; GO:0003674,molecular_function; GO:0003824,catalytic activity; GO:00164…	PF03171.23:2OG-Fe(II) oxygenase superfamily	0.4897	0.7991	1.0709	1.5052	1.7779	1.2278	1.5452	3.4128	3.1215	-0.767611	0.102789	0.188321	-1.59522	0.000510385	0.000984571	0.833327	0.0293763	0.0478618
Pcab063299	scaffold_812	303755	305828	+	K05278 flavonol synthase [EC:1.14.20.6] | (RefSeq) flavonol synthase/flavanone 3-hydroxylase (A)	up	down	NA	ko00941: Flavonoid biosynthesis; ko01100: Metabolic pathways; ko01110: Biosynthesis of secondary metabolites	hypothetical protein Pfo_021144 [Paulownia fortunei]	FLS_PETHY RecName: Full=Flavonol synthase/flavanone 3-hydroxylase; Short=FLS; EC=1.14.11.9 {ECO:0000250|UniProtKB:Q7XZQ6}; EC=1.14.20.6 {ECO:0000250|UniProtKB:Q7XZQ6};	A0A2G9H1G9_9LAMI SubName: Full=Iron/ascorbate family oxidoreductase {ECO:0000313|EMBL:PIN11382.1}; EC=1.14.11.23 {ECO:0000313|EMBL:PIN11382.1};	Iron/ascorbate family oxidoreductases	GO:0005737,cytoplasm; GO:0045431,flavonol synthase activity; GO:0031418,L-ascorbic acid binding; GO:0046872,metal ion binding; GO:0045486,naringenin 3-dioxygenase activity; GO:0009805,coumarin biosynthetic process; GO:0002238,response to molecule of fungal origin; GO:0003674,molecular_function; GO:0003824,catalytic activity; GO:0016491,oxidoreductase activity; GO:0016705,oxidoreductase activity, …	PF03171.23:2OG-Fe(II) oxygenase superfamily	0.096	0	0	0.7428	0.0929	0.2291	16.046	13.9289	15.4944	NA	NA	NA	-8.67855	4.34e-17	2.21e-16	5.39023	1.48e-16	8.52e-16
Pcab096095	scaffold_955	206053	207861	-	K05278 flavonol synthase [EC:1.14.20.6] | (RefSeq) flavonol synthase/flavanone 3-hydroxylase (A)	up	down	FALSE	ko00941: Flavonoid biosynthesis; ko01100: Metabolic pathways; ko01110: Biosynthesis of secondary metabolites	jasmonate-induced oxygenase 4 [Salvia hispanica]	JOX4_ARATH RecName: Full=Jasmonate-induced oxygenase 4 {ECO:0000303|PubMed:28559313}; EC=1.14.11.- {ECO:0000269|PubMed:28559313, ECO:0000269|PubMed:28760569}; AltName: Full=2-oxoglutarate-dependent dioxygenase JOX4 {ECO:0000305}; AltName: Full=Anthocyanidin synthase {ECO:0000305}; AltName: Full=Jasmonic acid oxidase 4 {ECO:0000303|PubMed:28760569};	A0A4D9ADC5_SALSN RecName: Full=Fe2OG dioxygenase domain-containing protein {ECO:0000259|PROSITE:PS51471};	Iron/ascorbate family oxidoreductases	GO:0005829,cytosol; GO:0051213,dioxygenase activity; GO:0005506,iron ion binding; GO:0120091,jasmonic acid hydrolase; GO:0006952,defense response; GO:1900366,negative regulation of defense response to insect; GO:1900150,regulation of defense response to fungus; GO:2000022,regulation of jasmonic acid mediated signaling pathway; GO:0003674,molecular_function; GO:0003824,catalytic activity; GO:00164…	PF03171.23:2OG-Fe(II) oxygenase superfamily	0.3055	0.9818	0.8175	0.6122	1.0649	0.8755	2.6993	2.3783	1.9389	-0.10787	0.85079	0.90563	-1.54448	0.00104122	0.00193118	1.44156	0.000583468	0.00126594
Pcab099014	scaffold_1665	101205	103269	+	K05278 flavonol synthase [EC:1.14.20.6] | (RefSeq) flavonol synthase/flavanone 3-hydroxylase-like (A)	up	down	NA	ko00941: Flavonoid biosynthesis; ko01100: Metabolic pathways; ko01110: Biosynthesis of secondary metabolites	hypothetical protein Pfo_021144 [Paulownia fortunei]	FLS_PETHY RecName: Full=Flavonol synthase/flavanone 3-hydroxylase; Short=FLS; EC=1.14.11.9 {ECO:0000250|UniProtKB:Q7XZQ6}; EC=1.14.20.6 {ECO:0000250|UniProtKB:Q7XZQ6};	A0A2G9H1G9_9LAMI SubName: Full=Iron/ascorbate family oxidoreductase {ECO:0000313|EMBL:PIN11382.1}; EC=1.14.11.23 {ECO:0000313|EMBL:PIN11382.1};	Iron/ascorbate family oxidoreductases	GO:0005737,cytoplasm; GO:0045431,flavonol synthase activity; GO:0031418,L-ascorbic acid binding; GO:0046872,metal ion binding; GO:0045486,naringenin 3-dioxygenase activity; GO:0009805,coumarin biosynthetic process; GO:0002238,response to molecule of fungal origin; GO:0003674,molecular_function; GO:0003824,catalytic activity; GO:0016491,oxidoreductase activity; GO:0016705,oxidoreductase activity, …	PF03171.23:2OG-Fe(II) oxygenase superfamily	0.43	0.5278	0.4917	0.5222	0.5088	0.3194	2.8945	4.6239	4.2773	NA	NA	NA	-2.83736	5.99e-13	2.47e-12	3.11275	1.16e-15	6.42e-15
Pcab103236	scaffold_1893	147219	149634	-	K05278 flavonol synthase [EC:1.14.20.6] | (RefSeq) flavonol synthase/flavanone 3-hydroxylase-like (A)	up	down	down	ko00941: Flavonoid biosynthesis; ko01100: Metabolic pathways; ko01110: Biosynthesis of secondary metabolites	hypothetical protein Pfo_003514 [Paulownia fortunei]	JOX4_ARATH RecName: Full=Jasmonate-induced oxygenase 4 {ECO:0000303|PubMed:28559313}; EC=1.14.11.- {ECO:0000269|PubMed:28559313, ECO:0000269|PubMed:28760569}; AltName: Full=2-oxoglutarate-dependent dioxygenase JOX4 {ECO:0000305}; AltName: Full=Anthocyanidin synthase {ECO:0000305}; AltName: Full=Jasmonic acid oxidase 4 {ECO:0000303|PubMed:28760569};	A0A830CPL6_9LAMI SubName: Full=Protein srg1 {ECO:0000313|EMBL:GFQ01781.1};	Iron/ascorbate family oxidoreductases	GO:0005829,cytosol; GO:0051213,dioxygenase activity; GO:0005506,iron ion binding; GO:0120091,jasmonic acid hydrolase; GO:0006952,defense response; GO:1900366,negative regulation of defense response to insect; GO:1900150,regulation of defense response to fungus; GO:2000022,regulation of jasmonic acid mediated signaling pathway; GO:0003674,molecular_function; GO:0003824,catalytic activity; GO:00164…	PF03171.23:2OG-Fe(II) oxygenase superfamily	0.2378	0.1194	0	1.7864	1.8414	2.4411	73.2166	77.2797	79.4115	-3.90092	6.96e-08	4.66e-07	-9.12444	6.41e-53	8.04e-52	5.2293	2.28e-223	1.77e-221
Pcab130932	scaffold_3062	23664	26664	+	K05278 flavonol synthase [EC:1.14.20.6] | (RefSeq) flavonol synthase/flavanone 3-hydroxylase-like (A)	up	down	down	ko00941: Flavonoid biosynthesis; ko01100: Metabolic pathways; ko01110: Biosynthesis of secondary metabolites	hypothetical protein Pfo_003514 [Paulownia fortunei]	JOX2_ARATH RecName: Full=Jasmonate-induced oxygenase 2 {ECO:0000303|PubMed:28559313}; EC=1.14.11.- {ECO:0000269|PubMed:28559313, ECO:0000269|PubMed:28760569, ECO:0000269|PubMed:33516967}; AltName: Full=2-oxoglutarate-dependent dioxygenase JOX2 {ECO:0000305}; AltName: Full=Jasmonic acid oxidase 2 {ECO:0000303|PubMed:28760569};	A0A830CPL6_9LAMI SubName: Full=Protein srg1 {ECO:0000313|EMBL:GFQ01781.1};	Iron/ascorbate family oxidoreductases	GO:0005829,cytosol; GO:0051213,dioxygenase activity; GO:0005506,iron ion binding; GO:0120091,jasmonic acid hydrolase; GO:0097237,cellular response to toxic substance; GO:0006952,defense response; GO:1900366,negative regulation of defense response to insect; GO:1900150,regulation of defense response to fungus; GO:2000022,regulation of jasmonic acid mediated signaling pathway; GO:0003674,molecular_…	PF14226.9:non-haem dioxygenase in morphine synthesis N-terminal	0	0	0.4779	4.592	5.0743	5.703	133.889	129.528	131.792	-4.84992	0.0009014	0.00315186	-9.51367	7.52e-12	2.91e-11	4.66921	0	0
Pcab135917	scaffold_3165	98	4846	-	K05278 flavonol synthase [EC:1.14.20.6] | (RefSeq) flavonol synthase/flavanone 3-hydroxylase (A)	FALSE	down	down	ko00941: Flavonoid biosynthesis; ko01100: Metabolic pathways; ko01110: Biosynthesis of secondary metabolites	2-oxoglutarate-dependent dioxygenase 11-like [Salvia splendens]	SRG1_ARATH RecName: Full=Protein SRG1; Short=AtSRG1; AltName: Full=Protein SENESCENCE-RELATED GENE 1;	A0A4D8ZPD6_SALSN RecName: Full=Fe2OG dioxygenase domain-containing protein {ECO:0000259|PROSITE:PS51471};	Iron/ascorbate family oxidoreductases	GO:0046872,metal ion binding; GO:0016682,oxidoreductase activity, acting on diphenols and related substances as donors, oxygen as acceptor; GO:0010150,leaf senescence; GO:0003674,molecular_function; GO:0005488,binding; GO:0043167,ion binding; GO:0043169,cation binding; GO:0003824,catalytic activity; GO:0016491,oxidoreductase activity; GO:0016679,oxidoreductase activity, acting on diphenols and re…	PF03171.23:2OG-Fe(II) oxygenase superfamily	0.6317	1.1534	0.4137	2.1444	1.946	1.3713	2.3194	2.4768	1.4968	-1.13998	0.0129819	0.0333694	-1.31998	0.00530718	0.00892638	0.183776	0.612779	0.6795
novel.1344	scaffold_1154	355339	364760	-	K05278 flavonol synthase [EC:1.14.20.6] | (RefSeq) flavonol synthase/flavanone 3-hydroxylase-like (A)	up	FALSE	up	ko00941: Flavonoid biosynthesis; ko01100: Metabolic pathways; ko01110: Biosynthesis of secondary metabolites	protein srg1 [Phtheirospermum japonicum]	JOX4_ARATH RecName: Full=Jasmonate-induced oxygenase 4 {ECO:0000303|PubMed:28559313}; EC=1.14.11.- {ECO:0000269|PubMed:28559313, ECO:0000269|PubMed:28760569}; AltName: Full=2-oxoglutarate-dependent dioxygenase JOX4 {ECO:0000305}; AltName: Full=Anthocyanidin synthase {ECO:0000305}; AltName: Full=Jasmonic acid oxidase 4 {ECO:0000303|PubMed:28760569};	A0A830CPL6_9LAMI SubName: Full=Protein srg1 {ECO:0000313|EMBL:GFQ01781.1};	Iron/ascorbate family oxidoreductases	GO:0005829,cytosol; GO:0051213,dioxygenase activity; GO:0005506,iron ion binding; GO:0120091,jasmonic acid hydrolase; GO:0006952,defense response; GO:1900366,negative regulation of defense response to insect; GO:1900150,regulation of defense response to fungus; GO:2000022,regulation of jasmonic acid mediated signaling pathway; GO:0003674,molecular_function; GO:0003824,catalytic activity; GO:00164…	PF14226.9:non-haem dioxygenase in morphine synthesis N-terminal	6.4622	7.6688	7.0526	2.4075	1.4692	2.2443	12.6659	12.8224	15.2555	1.96034	2.13e-18	3.07e-17	-0.752292	2.11e-06	5.3e-06	2.71642	5.4e-40	6.32e-39
luteolin	apigenin	EC:1.14.19.76 flavone synthase II
Pcab039296	scaffold_166	879834	882425	+	K23179 flavone synthase II [EC:1.14.19.76] | (RefSeq) licodione synthase-like (A)	down	FALSE	down	ko00941: Flavonoid biosynthesis; ko00943: Isoflavonoid biosynthesis; ko01100: Metabolic pathways; ko01110: Biosynthesis of secondary metabolites	hypothetical protein Pfo_007118 [Paulownia fortunei]	C93B2_GERHY RecName: Full=Cytochrome P450 93B2 {ECO:0000303|PubMed:10652133}; EC=1.14.19.76 {ECO:0000269|PubMed:10652133}; AltName: Full=Flavone synthase II {ECO:0000303|PubMed:10652133}; Short=FNSII {ECO:0000303|PubMed:10652133};	A0A1C9ULQ1_ERYLE SubName: Full=Flavone synthase {ECO:0000313|EMBL:AOR81894.1};	Cytochrome P450 CYP2 subfamily	GO:0016021,integral component of membrane; GO:0020037,heme binding; GO:0005506,iron ion binding; GO:0004497,monooxygenase activity; GO:0016717,oxidoreductase activity, acting on paired donors, with oxidation of a pair of donors resulting in the reduction of molecular oxygen to two molecules of water; GO:0051553,flavone biosynthetic process; GO:0003674,molecular_function; GO:0005488,binding; GO:00…	PF00067.25:Cytochrome P450	4.2478	3.4692	3.1472	16.1959	18.4783	16.6068	5.361	5.7788	5.7119	-2.06527	2.5e-33	6.48e-32	-0.43989	0.0651616	0.0910331	-1.62068	6.07e-24	4.65e-23
Pcab039297	scaffold_166	882479	882811	+	K23179 flavone synthase II [EC:1.14.19.76] | (RefSeq) licodione synthase-like (A)	down	FALSE	down	ko00941: Flavonoid biosynthesis; ko00943: Isoflavonoid biosynthesis; ko01100: Metabolic pathways; ko01110: Biosynthesis of secondary metabolites	flavone synthase II, partial [Glandularia x hybrida]	C9B16_SOYBN RecName: Full=Cytochrome P450 93B16 {ECO:0000305}; EC=1.14.19.76 {ECO:0000269|PubMed:20132953}; AltName: Full=Flavone synthase II {ECO:0000303|PubMed:20132953}; Short=GmFNSII {ECO:0000303|PubMed:20132953};	Q2PF13_VERHY SubName: Full=Flavone synthase II {ECO:0000313|EMBL:BAE72883.1}; Flags: Fragment;	Cytochrome P450 CYP2 subfamily	GO:0016021,integral component of membrane; GO:0016020,membrane; GO:0020037,heme binding; GO:0005506,iron ion binding; GO:0016709,oxidoreductase activity, acting on paired donors, with incorporation or reduction of molecular oxygen, NAD(P)H as one donor, and incorporation of one atom of oxygen; GO:0016717,oxidoreductase activity, acting on paired donors, with oxidation of a pair of donors resultin…	PF00067.25:Cytochrome P450	2.7196	3.3611	3.6596	22.1002	28.3544	18.9815	5.8085	8.5821	6.8747	-2.66417	2.96e-17	4.02e-16	-0.939929	0.0299882	0.0446968	-1.71671	5.58e-10	2.22e-09
Pcab054087	scaffold_181	217866	220898	-	K23179 flavone synthase II [EC:1.14.19.76] | (RefSeq) licodione synthase-like (A)	up	down	NA	ko00941: Flavonoid biosynthesis; ko00943: Isoflavonoid biosynthesis; ko01100: Metabolic pathways; ko01110: Biosynthesis of secondary metabolites	hypothetical protein Pfo_007118 [Paulownia fortunei]	C93B2_GERHY RecName: Full=Cytochrome P450 93B2 {ECO:0000303|PubMed:10652133}; EC=1.14.19.76 {ECO:0000269|PubMed:10652133}; AltName: Full=Flavone synthase II {ECO:0000303|PubMed:10652133}; Short=FNSII {ECO:0000303|PubMed:10652133};	A0A1C9ULQ1_ERYLE SubName: Full=Flavone synthase {ECO:0000313|EMBL:AOR81894.1};	Cytochrome P450 CYP2 subfamily	GO:0016021,integral component of membrane; GO:0020037,heme binding; GO:0005506,iron ion binding; GO:0004497,monooxygenase activity; GO:0016717,oxidoreductase activity, acting on paired donors, with oxidation of a pair of donors resulting in the reduction of molecular oxygen to two molecules of water; GO:0051553,flavone biosynthetic process; GO:0003674,molecular_function; GO:0005488,binding; GO:00…	PF00067.25:Cytochrome P450	0.1228	0	0.0421	0.1491	0.3566	0.0782	3.7193	2.4541	3.0147	NA	NA	NA	-5.5975	1.49e-12	6.03e-12	3.96129	2.97e-16	1.69e-15
Pcab107411	scaffold_1358	314271	321382	+	K23179 flavone synthase II [EC:1.14.19.76] | (RefSeq) licodione synthase-like (A)	up	down	NA	ko00941: Flavonoid biosynthesis; ko00943: Isoflavonoid biosynthesis; ko01100: Metabolic pathways; ko01110: Biosynthesis of secondary metabolites	hypothetical protein Pfo_007118 [Paulownia fortunei]	C93B2_GERHY RecName: Full=Cytochrome P450 93B2 {ECO:0000303|PubMed:10652133}; EC=1.14.19.76 {ECO:0000269|PubMed:10652133}; AltName: Full=Flavone synthase II {ECO:0000303|PubMed:10652133}; Short=FNSII {ECO:0000303|PubMed:10652133};	A0A6I9TZC6_SESIN SubName: Full=licodione synthase-like {ECO:0000313|RefSeq:XP_011089416.1};	Cytochrome P450 CYP2 subfamily	GO:0016021,integral component of membrane; GO:0020037,heme binding; GO:0005506,iron ion binding; GO:0004497,monooxygenase activity; GO:0016717,oxidoreductase activity, acting on paired donors, with oxidation of a pair of donors resulting in the reduction of molecular oxygen to two molecules of water; GO:0051553,flavone biosynthetic process; GO:0003674,molecular_function; GO:0005488,binding; GO:00…	PF00067.25:Cytochrome P450	0.1402	0.1877	0.0962	0.383	0.1809	0.2677	7.6657	9.5345	8.8947	NA	NA	NA	-5.74922	4.05e-28	3.01e-27	4.94781	6.24e-38	6.96e-37
Pcab131081	scaffold_2223	83397	86683	-	K23179 flavone synthase II [EC:1.14.19.76] | (RefSeq) licodione synthase-like (A)	up	down	down	ko00941: Flavonoid biosynthesis; ko00943: Isoflavonoid biosynthesis; ko01100: Metabolic pathways; ko01110: Biosynthesis of secondary metabolites	hypothetical protein Pfo_007118 [Paulownia fortunei]	C93B2_GERHY RecName: Full=Cytochrome P450 93B2 {ECO:0000303|PubMed:10652133}; EC=1.14.19.76 {ECO:0000269|PubMed:10652133}; AltName: Full=Flavone synthase II {ECO:0000303|PubMed:10652133}; Short=FNSII {ECO:0000303|PubMed:10652133};	A0A1C9ULQ1_ERYLE SubName: Full=Flavone synthase {ECO:0000313|EMBL:AOR81894.1};	Cytochrome P450 CYP2 subfamily	GO:0016021,integral component of membrane; GO:0020037,heme binding; GO:0005506,iron ion binding; GO:0004497,monooxygenase activity; GO:0016717,oxidoreductase activity, acting on paired donors, with oxidation of a pair of donors resulting in the reduction of molecular oxygen to two molecules of water; GO:0051553,flavone biosynthetic process; GO:0003674,molecular_function; GO:0005488,binding; GO:00…	PF00067.25:Cytochrome P450	1.2346	1.7657	1.001	7.1893	7.7875	5.896	14.6376	15.1515	14.796	-2.2103	1.91e-21	3.2e-20	-3.28328	5.57e-61	7.96e-60	1.07746	2.6e-15	1.42e-14
Pcab131082	scaffold_2223	103244	111603	-	K23179 flavone synthase II [EC:1.14.19.76] | (RefSeq) licodione synthase-like (A)	up	down	NA	ko00941: Flavonoid biosynthesis; ko00943: Isoflavonoid biosynthesis; ko01100: Metabolic pathways; ko01110: Biosynthesis of secondary metabolites	hypothetical protein Pfo_007118 [Paulownia fortunei]	C93B2_GERHY RecName: Full=Cytochrome P450 93B2 {ECO:0000303|PubMed:10652133}; EC=1.14.19.76 {ECO:0000269|PubMed:10652133}; AltName: Full=Flavone synthase II {ECO:0000303|PubMed:10652133}; Short=FNSII {ECO:0000303|PubMed:10652133};	A0A6I9TZC6_SESIN SubName: Full=licodione synthase-like {ECO:0000313|RefSeq:XP_011089416.1};	Cytochrome P450 CYP2 subfamily	GO:0016021,integral component of membrane; GO:0020037,heme binding; GO:0005506,iron ion binding; GO:0004497,monooxygenase activity; GO:0016717,oxidoreductase activity, acting on paired donors, with oxidation of a pair of donors resulting in the reduction of molecular oxygen to two molecules of water; GO:0051553,flavone biosynthetic process; GO:0003674,molecular_function; GO:0005488,binding; GO:00…	PF00067.25:Cytochrome P450	0	0	0	0.0788	0.2512	0.0826	10.5875	8.7788	7.5951	NA	NA	NA	-9.92999	9.9e-17	4.96e-16	6.02353	5.57e-34	5.69e-33
Pcab140447	scaffold_4324	17513	20666	-	K23179 flavone synthase II [EC:1.14.19.76] | (RefSeq) licodione synthase-like (A)	up	down	down	ko00941: Flavonoid biosynthesis; ko00943: Isoflavonoid biosynthesis; ko01100: Metabolic pathways; ko01110: Biosynthesis of secondary metabolites	hypothetical protein Pfo_007118 [Paulownia fortunei]	C93B2_GERHY RecName: Full=Cytochrome P450 93B2 {ECO:0000303|PubMed:10652133}; EC=1.14.19.76 {ECO:0000269|PubMed:10652133}; AltName: Full=Flavone synthase II {ECO:0000303|PubMed:10652133}; Short=FNSII {ECO:0000303|PubMed:10652133};	A0A1C9ULQ1_ERYLE SubName: Full=Flavone synthase {ECO:0000313|EMBL:AOR81894.1};	Cytochrome P450 CYP2 subfamily	GO:0016021,integral component of membrane; GO:0020037,heme binding; GO:0005506,iron ion binding; GO:0004497,monooxygenase activity; GO:0016717,oxidoreductase activity, acting on paired donors, with oxidation of a pair of donors resulting in the reduction of molecular oxygen to two molecules of water; GO:0051553,flavone biosynthetic process; GO:0003674,molecular_function; GO:0005488,binding; GO:00…	PF00067.25:Cytochrome P450	0.4898	0.1513	0.7366	3.0194	3.1004	2.231	40.0847	37.6497	36.9725	-2.43366	3.37e-10	2.85e-09	-6.19213	2.08e-125	6.36e-124	3.76075	1.58e-176	8.9e-175
novel.1063	scaffold_1112	28722	29791	+	K23179 flavone synthase II [EC:1.14.19.76] | (RefSeq) licodione synthase-like (A)	down	up	FALSE	ko00941: Flavonoid biosynthesis; ko00943: Isoflavonoid biosynthesis; ko01100: Metabolic pathways; ko01110: Biosynthesis of secondary metabolites	licodione synthase-like [Sesamum indicum]	C93B2_GERHY RecName: Full=Cytochrome P450 93B2 {ECO:0000303|PubMed:10652133}; EC=1.14.19.76 {ECO:0000269|PubMed:10652133}; AltName: Full=Flavone synthase II {ECO:0000303|PubMed:10652133}; Short=FNSII {ECO:0000303|PubMed:10652133};	A0A6I9TZC6_SESIN SubName: Full=licodione synthase-like {ECO:0000313|RefSeq:XP_011089416.1};	Cytochrome P450 CYP2 subfamily	GO:0016021,integral component of membrane; GO:0020037,heme binding; GO:0005506,iron ion binding; GO:0004497,monooxygenase activity; GO:0016717,oxidoreductase activity, acting on paired donors, with oxidation of a pair of donors resulting in the reduction of molecular oxygen to two molecules of water; GO:0051553,flavone biosynthetic process; GO:0003674,molecular_function; GO:0005488,binding; GO:00…	PF00067.25:Cytochrome P450	20.5737	21.7705	16.5479	35.6346	32.9021	31.7131	5.1766	3.8351	4.1314	-0.594855	2.06e-07	1.31e-06	2.36539	4.05e-36	3.69e-35	-2.95796	2.4e-76	5.2e-75
dihydroquercetin	dihydrokaempferol	EC:1.14.11.9 naringenin 3-dioxygenase
Pcab029205	scaffold_35	4259845	4262492	-	K00475 naringenin 3-dioxygenase [EC:1.14.11.9] | (RefSeq) naringenin,2-oxoglutarate 3-dioxygenase (A)	up	down	FALSE	ko00941: Flavonoid biosynthesis; ko01100: Metabolic pathways; ko01110: Biosynthesis of secondary metabolites	hypothetical protein Pfo_021498 [Paulownia fortunei]	FL3H_PETCR RecName: Full=Flavanone 3-dioxygenase; EC=1.14.11.9 {ECO:0000269|PubMed:12782296}; AltName: Full=Flavanone 3-beta-hydroxylase; AltName: Full=Flavanone 3-hydroxylase; Short=F3H; AltName: Full=Naringenin,2-oxoglutarate 3-dioxygenase; Short=Naringenin 3-dioxygenase;	A0A1X9PWT6_CAMAC SubName: Full=Flavanone 3-hydroxylase {ECO:0000313|EMBL:ARO92271.1};	Iron/ascorbate family oxidoreductases	GO:0031418,L-ascorbic acid binding; GO:0046872,metal ion binding; GO:0045486,naringenin 3-dioxygenase activity; GO:0009813,flavonoid biosynthetic process; GO:0003674,molecular_function; GO:0005488,binding; GO:0019842,vitamin binding; GO:0030246,carbohydrate binding; GO:0031406,carboxylic acid binding; GO:0036094,small molecule binding; GO:0043167,ion binding; GO:0043168,anion binding; GO:0043177,…	PF03171.23:2OG-Fe(II) oxygenase superfamily	0.5879	0.4723	0.6049	0.9637	1.8212	1.4037	14.0227	13.1097	13.3232	-1.15794	0.022667	0.0536457	-4.40959	5.85e-42	6.08e-41	3.25973	2.1e-42	2.59e-41
Pcab072788	scaffold_261	7550	10422	+	K00475 naringenin 3-dioxygenase [EC:1.14.11.9] | (RefSeq) naringenin,2-oxoglutarate 3-dioxygenase (A)	up	down	NA	ko00941: Flavonoid biosynthesis; ko01100: Metabolic pathways; ko01110: Biosynthesis of secondary metabolites	hypothetical protein Pfo_021498 [Paulownia fortunei]	FL3H_PETCR RecName: Full=Flavanone 3-dioxygenase; EC=1.14.11.9 {ECO:0000269|PubMed:12782296}; AltName: Full=Flavanone 3-beta-hydroxylase; AltName: Full=Flavanone 3-hydroxylase; Short=F3H; AltName: Full=Naringenin,2-oxoglutarate 3-dioxygenase; Short=Naringenin 3-dioxygenase;	A0A1X9PWT6_CAMAC SubName: Full=Flavanone 3-hydroxylase {ECO:0000313|EMBL:ARO92271.1};	Iron/ascorbate family oxidoreductases	GO:0031418,L-ascorbic acid binding; GO:0046872,metal ion binding; GO:0045486,naringenin 3-dioxygenase activity; GO:0009813,flavonoid biosynthetic process; GO:0003674,molecular_function; GO:0005488,binding; GO:0019842,vitamin binding; GO:0030246,carbohydrate binding; GO:0031406,carboxylic acid binding; GO:0036094,small molecule binding; GO:0043167,ion binding; GO:0043168,anion binding; GO:0043177,…	PF03171.23:2OG-Fe(II) oxygenase superfamily	0.1779	0.0595	0.122	0.378	0.4018	0.3964	3.8909	4.3031	4.77	NA	NA	NA	-4.98055	8.45e-14	3.66e-13	3.44827	4.85e-16	2.73e-15
Pcab105446	scaffold_872	387490	390605	-	K00475 naringenin 3-dioxygenase [EC:1.14.11.9] | (RefSeq) naringenin,2-oxoglutarate 3-dioxygenase (A)	up	down	FALSE	ko00941: Flavonoid biosynthesis; ko01100: Metabolic pathways; ko01110: Biosynthesis of secondary metabolites	flavanone 3-hydroxylase [Camptotheca acuminata]	FL3H_PETCR RecName: Full=Flavanone 3-dioxygenase; EC=1.14.11.9 {ECO:0000269|PubMed:12782296}; AltName: Full=Flavanone 3-beta-hydroxylase; AltName: Full=Flavanone 3-hydroxylase; Short=F3H; AltName: Full=Naringenin,2-oxoglutarate 3-dioxygenase; Short=Naringenin 3-dioxygenase;	A0A1X9PWT6_CAMAC SubName: Full=Flavanone 3-hydroxylase {ECO:0000313|EMBL:ARO92271.1};	Iron/ascorbate family oxidoreductases	GO:0031418,L-ascorbic acid binding; GO:0046872,metal ion binding; GO:0045486,naringenin 3-dioxygenase activity; GO:0009813,flavonoid biosynthetic process; GO:0003674,molecular_function; GO:0005488,binding; GO:0019842,vitamin binding; GO:0030246,carbohydrate binding; GO:0031406,carboxylic acid binding; GO:0036094,small molecule binding; GO:0043167,ion binding; GO:0043168,anion binding; GO:0043177,…	PF03171.23:2OG-Fe(II) oxygenase superfamily	0.3527	1.1806	0.7259	1.0172	1.4228	1.5721	2.5968	2.9682	2.5314	-0.656621	0.189752	0.306576	-1.65134	0.000177283	0.000361273	1.00004	0.004867	0.00917498
Pcab112321	scaffold_745	293198	294615	-	K00475 naringenin 3-dioxygenase [EC:1.14.11.9] | (RefSeq) naringenin,2-oxoglutarate 3-dioxygenase (A)	up	down	NA	ko00941: Flavonoid biosynthesis; ko01100: Metabolic pathways; ko01110: Biosynthesis of secondary metabolites	Flavanone 3-dioxygenase [Camellia lanceoleosa]	FL3H_PETCR RecName: Full=Flavanone 3-dioxygenase; EC=1.14.11.9 {ECO:0000269|PubMed:12782296}; AltName: Full=Flavanone 3-beta-hydroxylase; AltName: Full=Flavanone 3-hydroxylase; Short=F3H; AltName: Full=Naringenin,2-oxoglutarate 3-dioxygenase; Short=Naringenin 3-dioxygenase;	Q6DV45_CAMSI SubName: Full=Flavanone 3-hydroxylase {ECO:0000313|EMBL:AAT68774.1};	Iron/ascorbate family oxidoreductases	GO:0031418,L-ascorbic acid binding; GO:0046872,metal ion binding; GO:0045486,naringenin 3-dioxygenase activity; GO:0009813,flavonoid biosynthetic process; GO:0003674,molecular_function; GO:0005488,binding; GO:0019842,vitamin binding; GO:0030246,carbohydrate binding; GO:0031406,carboxylic acid binding; GO:0036094,small molecule binding; GO:0043167,ion binding; GO:0043168,anion binding; GO:0043177,…	PF03171.23:2OG-Fe(II) oxygenase superfamily	0.9635	1.3546	1.4872	1.2285	0.653	0.5522	8.3907	8.2096	9.0623	NA	NA	NA	-2.56315	2.74e-13	1.15e-12	3.37241	1.89e-18	1.19e-17
Pcab130038	scaffold_2609	72313	75505	-	K00475 naringenin 3-dioxygenase [EC:1.14.11.9] | (RefSeq) naringenin,2-oxoglutarate 3-dioxygenase (A)	up	down	NA	ko00941: Flavonoid biosynthesis; ko01100: Metabolic pathways; ko01110: Biosynthesis of secondary metabolites	flavanone 3-hydroxylase [Camptotheca acuminata]	FL3H_PETCR RecName: Full=Flavanone 3-dioxygenase; EC=1.14.11.9 {ECO:0000269|PubMed:12782296}; AltName: Full=Flavanone 3-beta-hydroxylase; AltName: Full=Flavanone 3-hydroxylase; Short=F3H; AltName: Full=Naringenin,2-oxoglutarate 3-dioxygenase; Short=Naringenin 3-dioxygenase;	A0A1X9PWT6_CAMAC SubName: Full=Flavanone 3-hydroxylase {ECO:0000313|EMBL:ARO92271.1};	Iron/ascorbate family oxidoreductases	GO:0031418,L-ascorbic acid binding; GO:0046872,metal ion binding; GO:0045486,naringenin 3-dioxygenase activity; GO:0009813,flavonoid biosynthetic process; GO:0003674,molecular_function; GO:0005488,binding; GO:0019842,vitamin binding; GO:0030246,carbohydrate binding; GO:0031406,carboxylic acid binding; GO:0036094,small molecule binding; GO:0043167,ion binding; GO:0043168,anion binding; GO:0043177,…	PF03171.23:2OG-Fe(II) oxygenase superfamily	0.2354	0.1772	0	1.2324	0.5696	0.7305	4.4554	2.5375	3.1336	NA	NA	NA	-4.40635	2.91e-11	1.09e-10	1.96992	6.49e-07	2e-06
naringenin	EC:5.5.1.6 chalcone isomerase
Pcab014200	scaffold_20	2967178	2970602	-	K01859 chalcone isomerase [EC:5.5.1.6] | (RefSeq) vacuolar-sorting receptor 1 (A)	down	FALSE	FALSE	ko00941: Flavonoid biosynthesis; ko01100: Metabolic pathways; ko01110: Biosynthesis of secondary metabolites	hypothetical protein Pfo_012436 [Paulownia fortunei]	VSR6_ARATH RecName: Full=Vacuolar-sorting receptor 6; Short=AtVSR6; AltName: Full=BP80-like protein d; Short=AtBP80d; AltName: Full=Epidermal growth factor receptor-like protein 6; Short=AtELP6; Flags: Precursor;	A0A6I9UQA6_SESIN SubName: Full=vacuolar-sorting receptor 6 {ECO:0000313|RefSeq:XP_011096860.1};	--	GO:0030665,clathrin-coated vesicle membrane; GO:0005768,endosome; GO:0000139,Golgi membrane; GO:0017119,Golgi transport complex; GO:0016021,integral component of membrane; GO:0016020,membrane; GO:0005802,trans-Golgi network; GO:0005509,calcium ion binding; GO:0061630,ubiquitin protein ligase activity; GO:0006896,Golgi to vacuole transport; GO:0006623,protein targeting to vacuole; GO:0006511,ubiqu…	PF02225.25:PA domain	8.5757	7.0308	8.0426	11.9125	12.4534	12.7005	5.6513	5.8234	4.705	-0.475907	1.53e-05	7.48e-05	0.741653	5.42e-07	1.44e-06	-1.21318	1.03e-21	7.31e-21
Pcab019727	scaffold_126	1045763	1050240	+	K01859 chalcone isomerase [EC:5.5.1.6] | (RefSeq) vacuolar-sorting receptor 1 (A)	down	FALSE	FALSE	ko00941: Flavonoid biosynthesis; ko01100: Metabolic pathways; ko01110: Biosynthesis of secondary metabolites	vacuolar-sorting receptor 3 [Sesamum indicum]	VSR3_ARATH RecName: Full=Vacuolar-sorting receptor 3; Short=AtVSR3; AltName: Full=BP80-like protein a'; Short=AtBP80a'; AltName: Full=Epidermal growth factor receptor-like protein 2a; Short=AtELP2a; Flags: Precursor;	A0A6I9TQR6_SESIN SubName: Full=vacuolar-sorting receptor 3 {ECO:0000313|RefSeq:XP_011088070.1};	--	GO:0030665,clathrin-coated vesicle membrane; GO:0005768,endosome; GO:0005794,Golgi apparatus; GO:0000137,Golgi cis cisterna; GO:0000139,Golgi membrane; GO:0017119,Golgi transport complex; GO:0016021,integral component of membrane; GO:0016020,membrane; GO:0005739,mitochondrion; GO:0005802,trans-Golgi network; GO:0005509,calcium ion binding; GO:0061630,ubiquitin protein ligase activity; GO:0006896,…	PF02225.25:PA domain	17.4791	15.8777	11.4363	31.5143	28.6107	31.4583	14.9827	15.0382	14.998	-0.857706	5.24e-12	5.15e-11	0.187711	0.21859	0.271697	-1.04136	2.32e-22	1.68e-21
Pcab078567	scaffold_1178	282535	285014	-	K01859 chalcone isomerase [EC:5.5.1.6] | (RefSeq) probable chalcone--flavonone isomerase 3 (A)	FALSE	up	FALSE	ko00941: Flavonoid biosynthesis; ko01100: Metabolic pathways; ko01110: Biosynthesis of secondary metabolites	hypothetical protein Pfo_022671 [Paulownia fortunei]	FAP3_ARATH RecName: Full=Fatty-acid-binding protein 3, chloroplastic; Short=AtFAP3; AltName: Full=Chalcone-flavanone isomerase family protein 3; Flags: Precursor;	A0A6I9UHN9_SESIN RecName: Full=Chalcone-flavonone isomerase family protein {ECO:0000256|RuleBase:RU361158};	--	GO:0009507,chloroplast; GO:0009570,chloroplast stroma; GO:0005504,fatty acid binding; GO:0016872,intramolecular lyase activity; GO:0006631,fatty acid metabolic process; GO:0003674,molecular_function; GO:0005488,binding; GO:0008289,lipid binding; GO:0031406,carboxylic acid binding; GO:0033293,monocarboxylic acid binding; GO:0043167,ion binding; GO:0043168,anion binding; GO:0003824,catalytic activi…	PF02431.18:Chalcone-flavanone isomerase	13.4061	13.9426	14.6162	9.2293	8.6525	9.9841	5.0355	5.2881	4.3403	0.762392	2.41e-06	1.33e-05	1.70922	4.87e-17	2.47e-16	-0.942699	2.36e-05	6.12e-05
Pcab093954	scaffold_1363	28425	30368	+	K01859 chalcone isomerase [EC:5.5.1.6] | (RefSeq) vacuolar-sorting receptor 1 (A)	down	FALSE	down	ko00941: Flavonoid biosynthesis; ko01100: Metabolic pathways; ko01110: Biosynthesis of secondary metabolites	hypothetical protein Pfo_012436 [Paulownia fortunei]	VSR6_ARATH RecName: Full=Vacuolar-sorting receptor 6; Short=AtVSR6; AltName: Full=BP80-like protein d; Short=AtBP80d; AltName: Full=Epidermal growth factor receptor-like protein 6; Short=AtELP6; Flags: Precursor;	A0A6I9UQA6_SESIN SubName: Full=vacuolar-sorting receptor 6 {ECO:0000313|RefSeq:XP_011096860.1};	--	GO:0030665,clathrin-coated vesicle membrane; GO:0005768,endosome; GO:0000139,Golgi membrane; GO:0017119,Golgi transport complex; GO:0016021,integral component of membrane; GO:0016020,membrane; GO:0005802,trans-Golgi network; GO:0005509,calcium ion binding; GO:0061630,ubiquitin protein ligase activity; GO:0006896,Golgi to vacuole transport; GO:0006623,protein targeting to vacuole; GO:0006511,ubiqu…	PF12662.10:Complement Clr-like EGF-like	1.6537	1.9374	0.9927	7.7813	5.6703	5.4623	2.1741	1.3047	1.4055	-1.87125	1.19e-09	9.56e-09	0.113087	0.803497	0.8375	-1.98574	2.52e-10	1.03e-09
Pcab137798	scaffold_3863	13486	19618	+	K01859 chalcone isomerase [EC:5.5.1.6] | (RefSeq) vacuolar-sorting receptor 1 (A)	FALSE	FALSE	down	ko00941: Flavonoid biosynthesis; ko01100: Metabolic pathways; ko01110: Biosynthesis of secondary metabolites	vacuolar-sorting receptor 3 [Sesamum indicum]	VSR3_ARATH RecName: Full=Vacuolar-sorting receptor 3; Short=AtVSR3; AltName: Full=BP80-like protein a'; Short=AtBP80a'; AltName: Full=Epidermal growth factor receptor-like protein 2a; Short=AtELP2a; Flags: Precursor;	A0A6I9TQR6_SESIN SubName: Full=vacuolar-sorting receptor 3 {ECO:0000313|RefSeq:XP_011088070.1};	--	GO:0030665,clathrin-coated vesicle membrane; GO:0005768,endosome; GO:0005794,Golgi apparatus; GO:0000137,Golgi cis cisterna; GO:0000139,Golgi membrane; GO:0017119,Golgi transport complex; GO:0016021,integral component of membrane; GO:0016020,membrane; GO:0005739,mitochondrion; GO:0005802,trans-Golgi network; GO:0005509,calcium ion binding; GO:0061630,ubiquitin protein ligase activity; GO:0006896,…	PF02225.25:PA domain	18.8018	19.0554	17.9341	45.8197	46.5091	49.5557	27.6365	29.5739	26.8792	-1.17409	1.02e-72	6.53e-71	-0.398962	1.21e-06	3.12e-06	-0.770916	1.47e-27	1.26e-26
Pcab002868	scaffold_1_1017389_6871849	1707016	1709117	+	K01859 chalcone isomerase [EC:5.5.1.6] | (RefSeq) probable chalcone--flavonone isomerase 3 (A)	FALSE	down	down	ko00941: Flavonoid biosynthesis; ko01100: Metabolic pathways; ko01110: Biosynthesis of secondary metabolites	probable chalcone--flavonone isomerase 3 [Jatropha curcas]	CHIL2_HUMLU RecName: Full=Chalcone isomerase-like protein 2 {ECO:0000303|PubMed:29760092}; Short=HlCHIL2 {ECO:0000303|PubMed:29760092}; EC=5.5.1.6 {ECO:0000250|UniProtKB:Q8VZW3};	A0A067JNS6_JATCU RecName: Full=Chalcone-flavonone isomerase family protein {ECO:0000256|RuleBase:RU361158};	--	GO:0005737,cytoplasm; GO:0045430,chalcone isomerase activity; GO:0009813,flavonoid biosynthetic process; GO:0003674,molecular_function; GO:0003824,catalytic activity; GO:0016853,isomerase activity; GO:0016872,intramolecular lyase activity; GO:0008150,biological_process; GO:0008152,metabolic process; GO:0009058,biosynthetic process; GO:0009812,flavonoid metabolic process; GO:0071704,organic substa…	PF02431.18:Chalcone-flavanone isomerase	0.5255	1.4322	0.4635	3.555	4.7966	4.5886	5.7792	4.7378	5.5292	-2.24314	6.97e-08	4.66e-07	-2.53189	9.21e-10	3.1e-09	0.29207	0.260781	0.332154
Pcab020172	scaffold_177	447387	452426	+	K01859 chalcone isomerase [EC:5.5.1.6] | (RefSeq) chalcone--flavanone isomerase (A)	up	down	FALSE	ko00941: Flavonoid biosynthesis; ko01100: Metabolic pathways; ko01110: Biosynthesis of secondary metabolites	hypothetical protein Pfo_006194 [Paulownia fortunei]	CFI_ELAUM RecName: Full=Chalcone--flavanone isomerase; Short=Chalcone isomerase; EC=5.5.1.6;	A0A6I9TBC6_SESIN SubName: Full=spermatogenesis-associated protein 20 {ECO:0000313|RefSeq:XP_011079723.1};	Highly conserved protein containing a thioredoxin domain	GO:0045430,chalcone isomerase activity; GO:0009813,flavonoid biosynthetic process; GO:0003674,molecular_function; GO:0003824,catalytic activity; GO:0016853,isomerase activity; GO:0016872,intramolecular lyase activity; GO:0008150,biological_process; GO:0008152,metabolic process; GO:0009058,biosynthetic process; GO:0009812,flavonoid metabolic process; GO:0071704,organic substance metabolic process;…	PF03190.18:Protein of unknown function, DUF255	1.1664	1.1073	1.1347	1.5257	1.8888	2.1875	4.6569	4.0822	3.8689	-0.543124	0.0240897	0.056501	-1.69165	2.01e-16	9.92e-16	1.15297	7.61e-10	3.01e-09
Pcab034070	scaffold_66	205213	207480	-	K01859 chalcone isomerase [EC:5.5.1.6] | (RefSeq) probable chalcone--flavonone isomerase 3 (A)	up	down	down	ko00941: Flavonoid biosynthesis; ko01100: Metabolic pathways; ko01110: Biosynthesis of secondary metabolites	probable chalcone--flavonone isomerase 3 [Jatropha curcas]	CHIL2_HUMLU RecName: Full=Chalcone isomerase-like protein 2 {ECO:0000303|PubMed:29760092}; Short=HlCHIL2 {ECO:0000303|PubMed:29760092}; EC=5.5.1.6 {ECO:0000250|UniProtKB:Q8VZW3};	A0A067JNS6_JATCU RecName: Full=Chalcone-flavonone isomerase family protein {ECO:0000256|RuleBase:RU361158};	--	GO:0005737,cytoplasm; GO:0045430,chalcone isomerase activity; GO:0009813,flavonoid biosynthetic process; GO:0003674,molecular_function; GO:0003824,catalytic activity; GO:0016853,isomerase activity; GO:0016872,intramolecular lyase activity; GO:0008150,biological_process; GO:0008152,metabolic process; GO:0009058,biosynthetic process; GO:0009812,flavonoid metabolic process; GO:0071704,organic substa…	PF02431.18:Chalcone-flavanone isomerase	0	0.2321	0.3965	2.5265	2.9096	3.5328	25.773	25.696	30.9124	-3.67296	1.28e-08	9.3e-08	-6.85438	1.11e-37	1.05e-36	3.18603	4.02e-60	6.79e-59
Pcab037097	scaffold_406	112157	117611	+	K01859 chalcone isomerase [EC:5.5.1.6] | (RefSeq) chalcone--flavanone isomerase (A)	up	down	FALSE	ko00941: Flavonoid biosynthesis; ko01100: Metabolic pathways; ko01110: Biosynthesis of secondary metabolites	hypothetical protein Pfo_006194 [Paulownia fortunei]	CFI_ELAUM RecName: Full=Chalcone--flavanone isomerase; Short=Chalcone isomerase; EC=5.5.1.6;	A0A2G9G7G8_9LAMI SubName: Full=Protein containing a thioredoxin domain {ECO:0000313|EMBL:PIN01246.1};	Highly conserved protein containing a thioredoxin domain	GO:0045430,chalcone isomerase activity; GO:0009813,flavonoid biosynthetic process; GO:0003674,molecular_function; GO:0003824,catalytic activity; GO:0016853,isomerase activity; GO:0016872,intramolecular lyase activity; GO:0008150,biological_process; GO:0008152,metabolic process; GO:0009058,biosynthetic process; GO:0009812,flavonoid metabolic process; GO:0071704,organic substance metabolic process;…	PF03190.18:Protein of unknown function, DUF255	2.2973	2.1491	2.0204	4.1485	3.4786	4.3507	14.5212	13.7345	13.75	-0.716453	1.42e-05	7.01e-05	-2.50495	7.3e-84	1.45e-82	1.79231	1.73e-56	2.76e-55
Pcab043104	scaffold_370	955273	958702	+	K01859 chalcone isomerase [EC:5.5.1.6] | (RefSeq) vacuolar-sorting receptor 1 (A)	FALSE	down	FALSE	ko00941: Flavonoid biosynthesis; ko01100: Metabolic pathways; ko01110: Biosynthesis of secondary metabolites	hypothetical protein Pfo_012436 [Paulownia fortunei]	VSR6_ARATH RecName: Full=Vacuolar-sorting receptor 6; Short=AtVSR6; AltName: Full=BP80-like protein d; Short=AtBP80d; AltName: Full=Epidermal growth factor receptor-like protein 6; Short=AtELP6; Flags: Precursor;	A0A6I9UQA6_SESIN SubName: Full=vacuolar-sorting receptor 6 {ECO:0000313|RefSeq:XP_011096860.1};	--	GO:0030665,clathrin-coated vesicle membrane; GO:0005768,endosome; GO:0000139,Golgi membrane; GO:0017119,Golgi transport complex; GO:0016021,integral component of membrane; GO:0016020,membrane; GO:0005802,trans-Golgi network; GO:0005509,calcium ion binding; GO:0061630,ubiquitin protein ligase activity; GO:0006896,Golgi to vacuole transport; GO:0006623,protein targeting to vacuole; GO:0006511,ubiqu…	PF02225.25:PA domain	7.5416	8.3685	9.6023	12.3732	12.3295	13.649	24.9613	23.3972	23.5756	-0.417009	0.000231203	0.0009171	-1.30295	1.37e-33	1.17e-32	0.889935	1.3e-21	9.19e-21
Pcab070552	scaffold_1430	23802	25782	-	K01859 chalcone isomerase [EC:5.5.1.6] | (RefSeq) chalcone--flavonone isomerase (A)	up	down	down	ko00941: Flavonoid biosynthesis; ko01100: Metabolic pathways; ko01110: Biosynthesis of secondary metabolites	hypothetical protein Pfo_006192 [Paulownia fortunei]	CFI_VERHY RecName: Full=Chalcone--flavanone isomerase; Short=Chalcone isomerase; EC=5.5.1.6;	A0A146AUU2_SCUBA RecName: Full=Chalcone-flavonone isomerase family protein {ECO:0000256|RuleBase:RU361158};	--	GO:0045430,chalcone isomerase activity; GO:0009813,flavonoid biosynthetic process; GO:0003674,molecular_function; GO:0003824,catalytic activity; GO:0016853,isomerase activity; GO:0016872,intramolecular lyase activity; GO:0008150,biological_process; GO:0008152,metabolic process; GO:0009058,biosynthetic process; GO:0009812,flavonoid metabolic process; GO:0071704,organic substance metabolic process;…	PF02431.18:Chalcone-flavanone isomerase	5.4574	5.0649	5.3604	12.8768	13.1684	11.4117	57.0828	61.3188	62.5899	-1.06635	8.93e-14	9.93e-13	-3.31821	9.18e-196	4.95e-194	2.25599	6.76e-128	2.54e-126
Pcab082430	scaffold_874	312656	315195	+	K01859 chalcone isomerase [EC:5.5.1.6] | (RefSeq) vacuolar-sorting receptor 1 (A)	FALSE	down	NA	ko00941: Flavonoid biosynthesis; ko01100: Metabolic pathways; ko01110: Biosynthesis of secondary metabolites	hypothetical protein Pfo_002553 [Paulownia fortunei]	VSR3_ARATH RecName: Full=Vacuolar-sorting receptor 3; Short=AtVSR3; AltName: Full=BP80-like protein a'; Short=AtBP80a'; AltName: Full=Epidermal growth factor receptor-like protein 2a; Short=AtELP2a; Flags: Precursor;	A0A6I9TQR6_SESIN SubName: Full=vacuolar-sorting receptor 3 {ECO:0000313|RefSeq:XP_011088070.1};	--	GO:0030665,clathrin-coated vesicle membrane; GO:0005768,endosome; GO:0005794,Golgi apparatus; GO:0000137,Golgi cis cisterna; GO:0000139,Golgi membrane; GO:0017119,Golgi transport complex; GO:0016021,integral component of membrane; GO:0016020,membrane; GO:0005739,mitochondrion; GO:0005802,trans-Golgi network; GO:0005509,calcium ion binding; GO:0061630,ubiquitin protein ligase activity; GO:0006896,…	--	0.4668	0.1172	0.8405	1.594	0.6778	1.2259	2.0618	1.9639	1.3223	NA	NA	NA	-1.71801	0.022673	0.0345098	0.589663	0.311605	0.386742
Pcab085081	scaffold_1667	115507	117438	+	K01859 chalcone isomerase [EC:5.5.1.6] | (RefSeq) chalcone--flavonone isomerase (A)	up	down	down	ko00941: Flavonoid biosynthesis; ko01100: Metabolic pathways; ko01110: Biosynthesis of secondary metabolites	hypothetical protein Pfo_006192 [Paulownia fortunei]	CFI_VERHY RecName: Full=Chalcone--flavanone isomerase; Short=Chalcone isomerase; EC=5.5.1.6;	A0A2G9G7T7_9LAMI RecName: Full=Chalcone-flavonone isomerase family protein {ECO:0000256|RuleBase:RU361158};	--	GO:0045430,chalcone isomerase activity; GO:0009813,flavonoid biosynthetic process; GO:0003674,molecular_function; GO:0003824,catalytic activity; GO:0016853,isomerase activity; GO:0016872,intramolecular lyase activity; GO:0008150,biological_process; GO:0008152,metabolic process; GO:0009058,biosynthetic process; GO:0009812,flavonoid metabolic process; GO:0071704,organic substance metabolic process;…	PF02431.18:Chalcone-flavanone isomerase	2.853	2.309	2.147	6.6312	7.0494	5.8157	30.7935	36.1912	38.4085	-1.2426	2.24e-09	1.76e-08	-3.65725	1.56e-115	4.37e-114	2.41917	2.71e-81	6.27e-80
Pcab100401	scaffold_1061	137701	139818	+	K01859 chalcone isomerase [EC:5.5.1.6] | (RefSeq) probable chalcone--flavonone isomerase 3 (A)	up	down	down	ko00941: Flavonoid biosynthesis; ko01100: Metabolic pathways; ko01110: Biosynthesis of secondary metabolites	probable chalcone--flavonone isomerase 3 [Jatropha curcas]	CHIL2_HUMLU RecName: Full=Chalcone isomerase-like protein 2 {ECO:0000303|PubMed:29760092}; Short=HlCHIL2 {ECO:0000303|PubMed:29760092}; EC=5.5.1.6 {ECO:0000250|UniProtKB:Q8VZW3};	A0A067JNS6_JATCU RecName: Full=Chalcone-flavonone isomerase family protein {ECO:0000256|RuleBase:RU361158};	--	GO:0005737,cytoplasm; GO:0045430,chalcone isomerase activity; GO:0009813,flavonoid biosynthetic process; GO:0003674,molecular_function; GO:0003824,catalytic activity; GO:0016853,isomerase activity; GO:0016872,intramolecular lyase activity; GO:0008150,biological_process; GO:0008152,metabolic process; GO:0009058,biosynthetic process; GO:0009812,flavonoid metabolic process; GO:0071704,organic substa…	PF02431.18:Chalcone-flavanone isomerase	0.9748	0.753	1.1575	4.1658	3.4121	2.8648	33.9755	24.2946	29.0608	-1.68693	2.14e-05	0.000102176	-4.72601	9.76e-63	1.43e-61	3.04112	9.24e-57	1.48e-55
Pcab103760	scaffold_993	396854	399161	-	K01859 chalcone isomerase [EC:5.5.1.6] | (RefSeq) probable chalcone--flavonone isomerase 3 (A)	up	down	FALSE	ko00941: Flavonoid biosynthesis; ko01100: Metabolic pathways; ko01110: Biosynthesis of secondary metabolites	probable chalcone--flavonone isomerase 3 [Jatropha curcas]	CHIL2_HUMLU RecName: Full=Chalcone isomerase-like protein 2 {ECO:0000303|PubMed:29760092}; Short=HlCHIL2 {ECO:0000303|PubMed:29760092}; EC=5.5.1.6 {ECO:0000250|UniProtKB:Q8VZW3};	A0A067JNS6_JATCU RecName: Full=Chalcone-flavonone isomerase family protein {ECO:0000256|RuleBase:RU361158};	--	GO:0005737,cytoplasm; GO:0045430,chalcone isomerase activity; GO:0009813,flavonoid biosynthetic process; GO:0003674,molecular_function; GO:0003824,catalytic activity; GO:0016853,isomerase activity; GO:0016872,intramolecular lyase activity; GO:0008150,biological_process; GO:0008152,metabolic process; GO:0009058,biosynthetic process; GO:0009812,flavonoid metabolic process; GO:0071704,organic substa…	PF02431.18:Chalcone-flavanone isomerase	1.8577	2.565	3.5046	2.3967	1.8734	3.6225	16.9002	22.7162	18.2439	0.177005	0.625926	0.738318	-2.68039	3.45e-30	2.71e-29	2.86069	7.39e-36	7.87e-35
2',3,4,4',6'-pentahydroxychalcone	naringenin chalcone	EC:2.3.1.74 chalcone synthase
Pcab004416	scaffold_158	1647511	1648826	+	K00660 chalcone synthase [EC:2.3.1.74] | (RefSeq) chalcone synthase (A)	down	up	up	ko00941: Flavonoid biosynthesis; ko00960: Tropane, piperidine and pyridine alkaloid biosynthesis; ko01100: Metabolic pathways; ko01110: Biosynthesis of secondary metabolites; ko04712: Circadian rhythm - plant	chalcone synthase-like protein [Pogostemon cablin]	CHSY_PERFR RecName: Full=Chalcone synthase; EC=2.3.1.74; AltName: Full=Naringenin-chalcone synthase;	A0A0C5CNH3_POGCB RecName: Full=Chalcone synthase {ECO:0000256|ARBA:ARBA00012975}; EC=2.3.1.74 {ECO:0000256|ARBA:ARBA00012975};	--	GO:0102128,chalcone synthase activity; GO:0016210,naringenin-chalcone synthase activity; GO:0009813,flavonoid biosynthetic process; GO:0003674,molecular_function; GO:0003824,catalytic activity; GO:0016740,transferase activity; GO:0016746,acyltransferase activity; GO:0016747,acyltransferase activity, transferring groups other than amino-acyl groups; GO:0008150,biological_process; GO:0008152,metabo…	PF00195.22:Chalcone and stilbene synthases, N-terminal domain	46.9304	36.7283	42.9647	17.3724	17.9231	17.7893	2.9117	2.9595	2.3593	1.42668	2.46e-43	8.51e-42	4.13745	3.06e-128	9.58e-127	-2.70671	1.71e-47	2.34e-46
Pcab004417	scaffold_158	1666901	1668381	-	K00660 chalcone synthase [EC:2.3.1.74] | (RefSeq) chalcone synthase (A)	down	up	up	ko00941: Flavonoid biosynthesis; ko00960: Tropane, piperidine and pyridine alkaloid biosynthesis; ko01100: Metabolic pathways; ko01110: Biosynthesis of secondary metabolites; ko04712: Circadian rhythm - plant	chalcone synthase [Phlomoides rotata]	CHSY_ANTMA RecName: Full=Chalcone synthase; EC=2.3.1.74; AltName: Full=Naringenin-chalcone synthase;	A0A0K0MWZ1_9LAMI RecName: Full=Chalcone synthase {ECO:0000256|ARBA:ARBA00012975}; EC=2.3.1.74 {ECO:0000256|ARBA:ARBA00012975};	--	GO:0102128,chalcone synthase activity; GO:0016210,naringenin-chalcone synthase activity; GO:0009813,flavonoid biosynthetic process; GO:0003674,molecular_function; GO:0003824,catalytic activity; GO:0016740,transferase activity; GO:0016746,acyltransferase activity; GO:0016747,acyltransferase activity, transferring groups other than amino-acyl groups; GO:0008150,biological_process; GO:0008152,metabo…	PF00195.22:Chalcone and stilbene synthases, N-terminal domain	32.9885	29.2933	31.0835	9.2484	8.8922	9.2668	0.7347	0.3402	0.8063	1.94038	1.69e-57	8.07e-56	5.84999	4.47e-77	8.06e-76	-3.90209	6.26e-28	5.42e-27
Pcab007928	scaffold_53	643016	644594	-	K00660 chalcone synthase [EC:2.3.1.74] | (RefSeq) chalcone synthase 6-4-like (A)	down	up	FALSE	ko00941: Flavonoid biosynthesis; ko00960: Tropane, piperidine and pyridine alkaloid biosynthesis; ko01100: Metabolic pathways; ko01110: Biosynthesis of secondary metabolites; ko04712: Circadian rhythm - plant	type III polyketide synthase A-like [Salvia hispanica]	PKSA_ARATH RecName: Full=Type III polyketide synthase A {ECO:0000303|PubMed:19043200}; Short=PKS-A; EC=2.3.1.- {ECO:0000305|PubMed:19043200}; AltName: Full=Hydroxyalkyl alpha-pyrone synthase PKS-A {ECO:0000303|PubMed:21193570}; AltName: Full=Protein LESS ADHESIVE POLLEN 6 {ECO:0000303|PubMed:20442277};	A0A4D9A322_SALSN RecName: Full=Chalcone synthase {ECO:0000256|ARBA:ARBA00012975}; EC=2.3.1.74 {ECO:0000256|ARBA:ARBA00012975};	--	GO:0005783,endoplasmic reticulum; GO:0016747,acyltransferase activity, transferring groups other than amino-acyl groups; GO:0090439,tetraketide alpha-pyrone synthase activity; GO:0009813,flavonoid biosynthetic process; GO:0010584,pollen exine formation; GO:0030639,polyketide biosynthetic process; GO:0080110,sporopollenin biosynthetic process; GO:0003674,molecular_function; GO:0003824,catalytic ac…	PF00195.22:Chalcone and stilbene synthases, N-terminal domain	1.3462	1.6897	3.0013	2.1454	2.2807	2.5178	0.7079	0.944	0.4449	-0.0335633	0.921403	0.951994	1.71084	0.000379338	0.000742851	-1.73857	4.96e-05	0.000123885
Pcab014996	scaffold_86	2315317	2317343	-	K00660 chalcone synthase [EC:2.3.1.74] | (RefSeq) chalcone synthase (A)	down	up	up	ko00941: Flavonoid biosynthesis; ko00960: Tropane, piperidine and pyridine alkaloid biosynthesis; ko01100: Metabolic pathways; ko01110: Biosynthesis of secondary metabolites; ko04712: Circadian rhythm - plant	RecName: Full=Chalcone synthase; AltName: Full=Naringenin-chalcone synthase [Antirrhinum majus]	CHSY_ANTMA RecName: Full=Chalcone synthase; EC=2.3.1.74; AltName: Full=Naringenin-chalcone synthase;	I7H458_ANTMA RecName: Full=Chalcone synthase {ECO:0000256|ARBA:ARBA00012975}; EC=2.3.1.74 {ECO:0000256|ARBA:ARBA00012975};	--	GO:0102128,chalcone synthase activity; GO:0016210,naringenin-chalcone synthase activity; GO:0009813,flavonoid biosynthetic process; GO:0003674,molecular_function; GO:0003824,catalytic activity; GO:0016740,transferase activity; GO:0016746,acyltransferase activity; GO:0016747,acyltransferase activity, transferring groups other than amino-acyl groups; GO:0008150,biological_process; GO:0008152,metabo…	PF00195.22:Chalcone and stilbene synthases, N-terminal domain	17.8265	17.6061	13.6974	8.2775	7.8343	7.3368	1.1101	1.1103	1.3954	1.23962	2.47e-16	3.18e-15	3.9571	1.12e-53	1.43e-52	-2.71327	1.05e-21	7.42e-21
Pcab023685	scaffold_167	380364	384350	-	K00660 chalcone synthase [EC:2.3.1.74] | (RefSeq) chalcone synthase (A)	down	FALSE	FALSE	ko00941: Flavonoid biosynthesis; ko00960: Tropane, piperidine and pyridine alkaloid biosynthesis; ko01100: Metabolic pathways; ko01110: Biosynthesis of secondary metabolites; ko04712: Circadian rhythm - plant	chalcone synthase-like protein [Pogostemon cablin]	CHSY_PERFR RecName: Full=Chalcone synthase; EC=2.3.1.74; AltName: Full=Naringenin-chalcone synthase;	A0A0C5CFR9_POGCB RecName: Full=Chalcone synthase {ECO:0000256|ARBA:ARBA00012975}; EC=2.3.1.74 {ECO:0000256|ARBA:ARBA00012975};	--	GO:0102128,chalcone synthase activity; GO:0016210,naringenin-chalcone synthase activity; GO:0009813,flavonoid biosynthetic process; GO:0003674,molecular_function; GO:0003824,catalytic activity; GO:0016740,transferase activity; GO:0016746,acyltransferase activity; GO:0016747,acyltransferase activity, transferring groups other than amino-acyl groups; GO:0008150,biological_process; GO:0008152,metabo…	PF00195.22:Chalcone and stilbene synthases, N-terminal domain	2.1326	1.6656	1.8287	3.9382	3.0969	2.7157	1.869	1.0593	1.074	-0.622369	0.0428725	0.0918831	0.697973	0.090075	0.122307	-1.31793	0.000238179	0.000545078
Pcab049366	scaffold_534	157724	166763	+	K00660 chalcone synthase [EC:2.3.1.74] | (RefSeq) uncharacterized protein LOC116265292 (A)	down	up	up	ko00941: Flavonoid biosynthesis; ko00960: Tropane, piperidine and pyridine alkaloid biosynthesis; ko01100: Metabolic pathways; ko01110: Biosynthesis of secondary metabolites; ko04712: Circadian rhythm - plant	hypothetical protein KIW84_025521 [Pisum sativum]	CHSY_PERFR RecName: Full=Chalcone synthase; EC=2.3.1.74; AltName: Full=Naringenin-chalcone synthase;	A0A438CV35_VITVI SubName: Full=Stilbene synthase 1 {ECO:0000313|EMBL:RVW27073.1};	--	GO:0102128,chalcone synthase activity; GO:0016210,naringenin-chalcone synthase activity; GO:0009813,flavonoid biosynthetic process; GO:0003674,molecular_function; GO:0003824,catalytic activity; GO:0016740,transferase activity; GO:0016746,acyltransferase activity; GO:0016747,acyltransferase activity, transferring groups other than amino-acyl groups; GO:0008150,biological_process; GO:0008152,metabo…	PF00195.22:Chalcone and stilbene synthases, N-terminal domain	47.8921	45.5364	51.0166	19.154	18.7007	19.1836	7.9147	6.1921	7.1063	1.51208	1.76e-107	1.95e-105	2.96588	6.87e-195	3.69e-193	-1.44868	1.81e-36	1.95e-35
Pcab136760	scaffold_3391	15075	17113	+	K00660 chalcone synthase [EC:2.3.1.74] | (RefSeq) chalcone synthase (A)	NA	up	up	ko00941: Flavonoid biosynthesis; ko00960: Tropane, piperidine and pyridine alkaloid biosynthesis; ko01100: Metabolic pathways; ko01110: Biosynthesis of secondary metabolites; ko04712: Circadian rhythm - plant	chalcone synthase [Sesamum indicum]	CHSY_ANTMA RecName: Full=Chalcone synthase; EC=2.3.1.74; AltName: Full=Naringenin-chalcone synthase;	A0A6I9TYP4_SESIN RecName: Full=Chalcone synthase {ECO:0000256|ARBA:ARBA00012975}; EC=2.3.1.74 {ECO:0000256|ARBA:ARBA00012975};	--	GO:0102128,chalcone synthase activity; GO:0016210,naringenin-chalcone synthase activity; GO:0009813,flavonoid biosynthetic process; GO:0003674,molecular_function; GO:0003824,catalytic activity; GO:0016740,transferase activity; GO:0016746,acyltransferase activity; GO:0016747,acyltransferase activity, transferring groups other than amino-acyl groups; GO:0008150,biological_process; GO:0008152,metabo…	PF00195.22:Chalcone and stilbene synthases, N-terminal domain	0.7698	1.2239	0.9901	0.4673	0.1863	0.2451	0	0.0675	0	1.89434	0.00368418	0.0111048	5.43108	5.04e-05	0.00010937	NA	NA	NA
Pcab136764	scaffold_3391	44243	45868	-	K00660 chalcone synthase [EC:2.3.1.74] | (RefSeq) chalcone synthase (A)	down	up	up	ko00941: Flavonoid biosynthesis; ko00960: Tropane, piperidine and pyridine alkaloid biosynthesis; ko01100: Metabolic pathways; ko01110: Biosynthesis of secondary metabolites; ko04712: Circadian rhythm - plant	chalcone synthase-like protein [Pogostemon cablin]	CHSY_ANTMA RecName: Full=Chalcone synthase; EC=2.3.1.74; AltName: Full=Naringenin-chalcone synthase;	A0A0C5CNH3_POGCB RecName: Full=Chalcone synthase {ECO:0000256|ARBA:ARBA00012975}; EC=2.3.1.74 {ECO:0000256|ARBA:ARBA00012975};	--	GO:0102128,chalcone synthase activity; GO:0016210,naringenin-chalcone synthase activity; GO:0009813,flavonoid biosynthetic process; GO:0003674,molecular_function; GO:0003824,catalytic activity; GO:0016740,transferase activity; GO:0016746,acyltransferase activity; GO:0016747,acyltransferase activity, transferring groups other than amino-acyl groups; GO:0008150,biological_process; GO:0008152,metabo…	PF00195.22:Chalcone and stilbene synthases, N-terminal domain	35.7237	30.0955	32.9716	12.9924	11.6953	11.2632	1.1616	0.3631	1.2385	1.62968	2.89e-47	1.12e-45	5.38444	5.88e-97	1.36e-95	-3.74555	2.19e-37	2.41e-36
Pcab004369	scaffold_158	1196697	1199847	+	K00660 chalcone synthase [EC:2.3.1.74] | (RefSeq) chalcone synthase (A)	up	down	up	ko00941: Flavonoid biosynthesis; ko00960: Tropane, piperidine and pyridine alkaloid biosynthesis; ko01100: Metabolic pathways; ko01110: Biosynthesis of secondary metabolites; ko04712: Circadian rhythm - plant	chalcone synthase-like protein [Pogostemon cablin]	CHSY_PERFR RecName: Full=Chalcone synthase; EC=2.3.1.74; AltName: Full=Naringenin-chalcone synthase;	A0A0C5CFR9_POGCB RecName: Full=Chalcone synthase {ECO:0000256|ARBA:ARBA00012975}; EC=2.3.1.74 {ECO:0000256|ARBA:ARBA00012975};	--	GO:0102128,chalcone synthase activity; GO:0016210,naringenin-chalcone synthase activity; GO:0009813,flavonoid biosynthetic process; GO:0003674,molecular_function; GO:0003824,catalytic activity; GO:0016740,transferase activity; GO:0016746,acyltransferase activity; GO:0016747,acyltransferase activity, transferring groups other than amino-acyl groups; GO:0008150,biological_process; GO:0008152,metabo…	PF00195.22:Chalcone and stilbene synthases, N-terminal domain	13.8536	14.1596	9.9789	5.6323	3.6883	5.4343	97.9109	90.9732	101.422	1.53704	3.27e-17	4.43e-16	-2.73907	9.41e-144	3.45e-142	4.27864	2.18e-291	2.56e-289
Pcab014988	scaffold_86	2268349	2270941	+	K00660 chalcone synthase [EC:2.3.1.74] | (RefSeq) chalcone synthase (A)	up	down	down	ko00941: Flavonoid biosynthesis; ko00960: Tropane, piperidine and pyridine alkaloid biosynthesis; ko01100: Metabolic pathways; ko01110: Biosynthesis of secondary metabolites; ko04712: Circadian rhythm - plant	chalcone synthase-like protein [Pogostemon cablin]	CHSY_ANTMA RecName: Full=Chalcone synthase; EC=2.3.1.74; AltName: Full=Naringenin-chalcone synthase;	A0A0C5CJU7_POGCB RecName: Full=Chalcone synthase {ECO:0000256|ARBA:ARBA00012975}; EC=2.3.1.74 {ECO:0000256|ARBA:ARBA00012975};	--	GO:0102128,chalcone synthase activity; GO:0016210,naringenin-chalcone synthase activity; GO:0009813,flavonoid biosynthetic process; GO:0003674,molecular_function; GO:0003824,catalytic activity; GO:0016740,transferase activity; GO:0016746,acyltransferase activity; GO:0016747,acyltransferase activity, transferring groups other than amino-acyl groups; GO:0008150,biological_process; GO:0008152,metabo…	PF00195.22:Chalcone and stilbene synthases, N-terminal domain	0.3264	0.5151	0.3839	1.6561	2.1668	1.0243	89.5677	89.6112	92.5194	-1.81422	0.000182504	0.000738411	-7.59959	3.76e-148	1.43e-146	5.79291	2.78e-293	3.31e-291
Pcab014989	scaffold_86	2282561	2284522	+	K00660 chalcone synthase [EC:2.3.1.74] | (RefSeq) chalcone synthase (A)	up	down	up	ko00941: Flavonoid biosynthesis; ko00960: Tropane, piperidine and pyridine alkaloid biosynthesis; ko01100: Metabolic pathways; ko01110: Biosynthesis of secondary metabolites; ko04712: Circadian rhythm - plant	chalcone synthase-like protein [Pogostemon cablin]	CHSY_PERFR RecName: Full=Chalcone synthase; EC=2.3.1.74; AltName: Full=Naringenin-chalcone synthase;	A0A0C5CK32_POGCB RecName: Full=Chalcone synthase {ECO:0000256|ARBA:ARBA00012975}; EC=2.3.1.74 {ECO:0000256|ARBA:ARBA00012975};	--	GO:0102128,chalcone synthase activity; GO:0016210,naringenin-chalcone synthase activity; GO:0009813,flavonoid biosynthetic process; GO:0003674,molecular_function; GO:0003824,catalytic activity; GO:0016740,transferase activity; GO:0016746,acyltransferase activity; GO:0016747,acyltransferase activity, transferring groups other than amino-acyl groups; GO:0008150,biological_process; GO:0008152,metabo…	PF00195.22:Chalcone and stilbene synthases, N-terminal domain	10.1523	9.6312	10.7354	4.1886	4.5614	2.8393	26.4043	30.7981	29.8726	1.56722	5.32e-16	6.73e-15	-1.32173	1.07e-24	7.22e-24	2.89272	9.36e-71	1.88e-69
Pcab021678	scaffold_182	1512169	1519595	+	K00660 chalcone synthase [EC:2.3.1.74] | (RefSeq) chalcone synthase (A)	FALSE	down	FALSE	ko00941: Flavonoid biosynthesis; ko00960: Tropane, piperidine and pyridine alkaloid biosynthesis; ko01100: Metabolic pathways; ko01110: Biosynthesis of secondary metabolites; ko04712: Circadian rhythm - plant	hypothetical protein Pfo_013313 [Paulownia fortunei]	ALIS3_ARATH RecName: Full=ALA-interacting subunit 3; Short=AtALIS3;	A0A6I9UCZ2_SESIN SubName: Full=uncharacterized protein LOC105175116 {ECO:0000313|RefSeq:XP_011095758.1};	--	GO:0005783,endoplasmic reticulum; GO:0005789,endoplasmic reticulum membrane; GO:0005794,Golgi apparatus; GO:0000139,Golgi membrane; GO:0016021,integral component of membrane; GO:0005634,nucleus; GO:0005886,plasma membrane; GO:0033036,macromolecule localization; GO:0008150,biological_process; GO:0051179,localization; GO:0005575,cellular_component; GO:0005622,intracellular anatomical structure; GO:…	PF10672.12:S-adenosylmethionine-dependent methyltransferase	0.903	0.9868	1.4211	1.5963	1.6456	1.8517	2.6145	3.0172	2.5882	-0.451501	0.104532	0.19091	-1.12277	2.42e-05	5.44e-05	0.675914	0.00276009	0.00541499
Pcab023687	scaffold_167	403177	406307	-	K00660 chalcone synthase [EC:2.3.1.74] | (RefSeq) chalcone synthase (A)	up	down	FALSE	ko00941: Flavonoid biosynthesis; ko00960: Tropane, piperidine and pyridine alkaloid biosynthesis; ko01100: Metabolic pathways; ko01110: Biosynthesis of secondary metabolites; ko04712: Circadian rhythm - plant	chalcone synthase-like protein [Pogostemon cablin]	CHSY_PERFR RecName: Full=Chalcone synthase; EC=2.3.1.74; AltName: Full=Naringenin-chalcone synthase;	A0A0C5CFR9_POGCB RecName: Full=Chalcone synthase {ECO:0000256|ARBA:ARBA00012975}; EC=2.3.1.74 {ECO:0000256|ARBA:ARBA00012975};	--	GO:0102128,chalcone synthase activity; GO:0016210,naringenin-chalcone synthase activity; GO:0009813,flavonoid biosynthetic process; GO:0003674,molecular_function; GO:0003824,catalytic activity; GO:0016740,transferase activity; GO:0016746,acyltransferase activity; GO:0016747,acyltransferase activity, transferring groups other than amino-acyl groups; GO:0008150,biological_process; GO:0008152,metabo…	PF00195.22:Chalcone and stilbene synthases, N-terminal domain	3.6135	2.4983	3.2917	3.9382	3.613	2.3763	45.6047	45.4873	46.6525	0.091865	0.746146	0.831219	-3.67968	4.61e-123	1.38e-121	3.77444	1.27e-136	5.11e-135
Pcab056463	scaffold_505	14178	17080	-	K00660 chalcone synthase [EC:2.3.1.74] | (RefSeq) chalcone synthase (A)	up	down	NA	ko00941: Flavonoid biosynthesis; ko00960: Tropane, piperidine and pyridine alkaloid biosynthesis; ko01100: Metabolic pathways; ko01110: Biosynthesis of secondary metabolites; ko04712: Circadian rhythm - plant	chalcone synthase-like protein [Pogostemon cablin]	CHSY_ANTMA RecName: Full=Chalcone synthase; EC=2.3.1.74; AltName: Full=Naringenin-chalcone synthase;	A0A0C5CJU7_POGCB RecName: Full=Chalcone synthase {ECO:0000256|ARBA:ARBA00012975}; EC=2.3.1.74 {ECO:0000256|ARBA:ARBA00012975};	--	GO:0102128,chalcone synthase activity; GO:0016210,naringenin-chalcone synthase activity; GO:0009813,flavonoid biosynthetic process; GO:0003674,molecular_function; GO:0003824,catalytic activity; GO:0016740,transferase activity; GO:0016746,acyltransferase activity; GO:0016747,acyltransferase activity, transferring groups other than amino-acyl groups; GO:0008150,biological_process; GO:0008152,metabo…	PF00195.22:Chalcone and stilbene synthases, N-terminal domain	0	0.1113	0	0	0	0.1588	1.3989	1.9238	1.6328	NA	NA	NA	-5.27803	3.26e-06	8.03e-06	4.96651	2.19e-07	7.05e-07
Pcab056464	scaffold_505	20011	20994	-	K00660 chalcone synthase [EC:2.3.1.74] | (RefSeq) chalcone synthase (A)	up	down	down	ko00941: Flavonoid biosynthesis; ko00960: Tropane, piperidine and pyridine alkaloid biosynthesis; ko01100: Metabolic pathways; ko01110: Biosynthesis of secondary metabolites; ko04712: Circadian rhythm - plant	chalcone synthase-like protein [Pogostemon cablin]	CHSY_ANTMA RecName: Full=Chalcone synthase; EC=2.3.1.74; AltName: Full=Naringenin-chalcone synthase;	A0A0C5CJU7_POGCB RecName: Full=Chalcone synthase {ECO:0000256|ARBA:ARBA00012975}; EC=2.3.1.74 {ECO:0000256|ARBA:ARBA00012975};	--	GO:0102128,chalcone synthase activity; GO:0016210,naringenin-chalcone synthase activity; GO:0009813,flavonoid biosynthetic process; GO:0003674,molecular_function; GO:0003824,catalytic activity; GO:0016740,transferase activity; GO:0016746,acyltransferase activity; GO:0016747,acyltransferase activity, transferring groups other than amino-acyl groups; GO:0008150,biological_process; GO:0008152,metabo…	PF00195.22:Chalcone and stilbene synthases, N-terminal domain	1.6283	2.4171	1.967	4.3198	4.2495	5.1389	120.443	123.471	131.727	-1.01687	0.000687032	0.0024628	-5.77313	1.83e-231	1.25e-229	4.76079	2.63e-301	3.27e-299
Pcab056467	scaffold_505	63602	65378	-	K00660 chalcone synthase [EC:2.3.1.74] | (RefSeq) chalcone synthase (A)	up	down	NA	ko00941: Flavonoid biosynthesis; ko00960: Tropane, piperidine and pyridine alkaloid biosynthesis; ko01100: Metabolic pathways; ko01110: Biosynthesis of secondary metabolites; ko04712: Circadian rhythm - plant	chalcone synthase-like protein [Pogostemon cablin]	CHSY_ANTMA RecName: Full=Chalcone synthase; EC=2.3.1.74; AltName: Full=Naringenin-chalcone synthase;	A0A0C5CJU7_POGCB RecName: Full=Chalcone synthase {ECO:0000256|ARBA:ARBA00012975}; EC=2.3.1.74 {ECO:0000256|ARBA:ARBA00012975};	--	GO:0102128,chalcone synthase activity; GO:0016210,naringenin-chalcone synthase activity; GO:0009813,flavonoid biosynthetic process; GO:0003674,molecular_function; GO:0003824,catalytic activity; GO:0016740,transferase activity; GO:0016746,acyltransferase activity; GO:0016747,acyltransferase activity, transferring groups other than amino-acyl groups; GO:0008150,biological_process; GO:0008152,metabo…	PF00195.22:Chalcone and stilbene synthases, N-terminal domain	0.2189	0.1649	0.0563	0.0498	0.1589	0.1568	6.0087	7.4257	7.4413	NA	NA	NA	-5.36962	2.41e-21	1.44e-20	5.83585	7.59e-23	5.59e-22
Pcab056468	scaffold_505	72830	74859	-	K00660 chalcone synthase [EC:2.3.1.74] | (RefSeq) stilbene synthase 3-like (A)	up	down	FALSE	ko00941: Flavonoid biosynthesis; ko00960: Tropane, piperidine and pyridine alkaloid biosynthesis; ko01100: Metabolic pathways; ko01110: Biosynthesis of secondary metabolites; ko04712: Circadian rhythm - plant	chalcone synthase-like protein [Pogostemon cablin]	CHSY_ANTMA RecName: Full=Chalcone synthase; EC=2.3.1.74; AltName: Full=Naringenin-chalcone synthase;	A0A0C5CJU7_POGCB RecName: Full=Chalcone synthase {ECO:0000256|ARBA:ARBA00012975}; EC=2.3.1.74 {ECO:0000256|ARBA:ARBA00012975};	--	GO:0102128,chalcone synthase activity; GO:0016210,naringenin-chalcone synthase activity; GO:0009813,flavonoid biosynthetic process; GO:0003674,molecular_function; GO:0003824,catalytic activity; GO:0016740,transferase activity; GO:0016746,acyltransferase activity; GO:0016747,acyltransferase activity, transferring groups other than amino-acyl groups; GO:0008150,biological_process; GO:0008152,metabo…	PF02797.18:Chalcone and stilbene synthases, C-terminal domain	1.03	0.094	1.0599	2.3876	1.4504	1.4309	47.1506	52.4963	54.8549	-1.10214	0.0761463	0.147872	-5.95366	1.72e-28	1.29e-27	4.85078	4.39e-104	1.34e-102
Pcab074447	scaffold_1031	245251	246237	-	K00660 chalcone synthase [EC:2.3.1.74] | (RefSeq) chalcone synthase (A)	up	down	FALSE	ko00941: Flavonoid biosynthesis; ko00960: Tropane, piperidine and pyridine alkaloid biosynthesis; ko01100: Metabolic pathways; ko01110: Biosynthesis of secondary metabolites; ko04712: Circadian rhythm - plant	chalcone synthase-like protein [Pogostemon cablin]	CHSY_PERFR RecName: Full=Chalcone synthase; EC=2.3.1.74; AltName: Full=Naringenin-chalcone synthase;	A0A0C5CFR9_POGCB RecName: Full=Chalcone synthase {ECO:0000256|ARBA:ARBA00012975}; EC=2.3.1.74 {ECO:0000256|ARBA:ARBA00012975};	--	GO:0102128,chalcone synthase activity; GO:0016210,naringenin-chalcone synthase activity; GO:0009813,flavonoid biosynthetic process; GO:0003674,molecular_function; GO:0003824,catalytic activity; GO:0016740,transferase activity; GO:0016746,acyltransferase activity; GO:0016747,acyltransferase activity, transferring groups other than amino-acyl groups; GO:0008150,biological_process; GO:0008152,metabo…	PF00195.22:Chalcone and stilbene synthases, N-terminal domain	3.2468	2.3389	3.7041	2.9568	2.1866	2.6291	26.3671	26.1336	22.4743	0.427145	0.174022	0.286463	-2.82003	1.93e-47	2.21e-46	3.24935	1.13e-63	2.02e-62
Pcab074450	scaffold_1031	280765	283910	-	K00660 chalcone synthase [EC:2.3.1.74] | (RefSeq) chalcone synthase (A)	up	down	FALSE	ko00941: Flavonoid biosynthesis; ko00960: Tropane, piperidine and pyridine alkaloid biosynthesis; ko01100: Metabolic pathways; ko01110: Biosynthesis of secondary metabolites; ko04712: Circadian rhythm - plant	chalcone synthase-like protein [Pogostemon cablin]	CHSY_PERFR RecName: Full=Chalcone synthase; EC=2.3.1.74; AltName: Full=Naringenin-chalcone synthase;	A0A0C5CFR9_POGCB RecName: Full=Chalcone synthase {ECO:0000256|ARBA:ARBA00012975}; EC=2.3.1.74 {ECO:0000256|ARBA:ARBA00012975};	--	GO:0102128,chalcone synthase activity; GO:0016210,naringenin-chalcone synthase activity; GO:0009813,flavonoid biosynthetic process; GO:0003674,molecular_function; GO:0003824,catalytic activity; GO:0016740,transferase activity; GO:0016746,acyltransferase activity; GO:0016747,acyltransferase activity, transferring groups other than amino-acyl groups; GO:0008150,biological_process; GO:0008152,metabo…	PF00195.22:Chalcone and stilbene synthases, N-terminal domain	3.677	4.291	5.7266	3.9821	2.5977	3.322	19.064	17.9798	18.4681	0.636103	0.00826588	0.0225645	-1.82812	3.62e-28	2.69e-27	2.46656	7.49e-49	1.05e-47
Pcab075640	scaffold_511	298500	300701	-	K00660 chalcone synthase [EC:2.3.1.74] | (RefSeq) chalcone synthase (A)	up	down	FALSE	ko00941: Flavonoid biosynthesis; ko00960: Tropane, piperidine and pyridine alkaloid biosynthesis; ko01100: Metabolic pathways; ko01110: Biosynthesis of secondary metabolites; ko04712: Circadian rhythm - plant	chalcone synthase [Pogostemon cablin]	CHSY_PERFR RecName: Full=Chalcone synthase; EC=2.3.1.74; AltName: Full=Naringenin-chalcone synthase;	A0A0C5D113_POGCB RecName: Full=Chalcone synthase {ECO:0000256|ARBA:ARBA00012975}; EC=2.3.1.74 {ECO:0000256|ARBA:ARBA00012975};	--	GO:0102128,chalcone synthase activity; GO:0016210,naringenin-chalcone synthase activity; GO:0009813,flavonoid biosynthetic process; GO:0003674,molecular_function; GO:0003824,catalytic activity; GO:0016740,transferase activity; GO:0016746,acyltransferase activity; GO:0016747,acyltransferase activity, transferring groups other than amino-acyl groups; GO:0008150,biological_process; GO:0008152,metabo…	PF00195.22:Chalcone and stilbene synthases, N-terminal domain	1.4862	1.8188	1.816	1.142	1.6636	1.6856	58.0272	61.0651	63.2047	0.362609	0.276854	0.40935	-4.96242	8.67e-201	4.81e-199	5.33219	2.91e-222	2.24e-220
Pcab097161	scaffold_1017	48323	50808	-	K00660 chalcone synthase [EC:2.3.1.74] | (RefSeq) chalcone synthase (A)	up	down	FALSE	ko00941: Flavonoid biosynthesis; ko00960: Tropane, piperidine and pyridine alkaloid biosynthesis; ko01100: Metabolic pathways; ko01110: Biosynthesis of secondary metabolites; ko04712: Circadian rhythm - plant	chalcone synthase [Pogostemon cablin]	CHSY_PERFR RecName: Full=Chalcone synthase; EC=2.3.1.74; AltName: Full=Naringenin-chalcone synthase;	A0A0C5D113_POGCB RecName: Full=Chalcone synthase {ECO:0000256|ARBA:ARBA00012975}; EC=2.3.1.74 {ECO:0000256|ARBA:ARBA00012975};	--	GO:0102128,chalcone synthase activity; GO:0016210,naringenin-chalcone synthase activity; GO:0009813,flavonoid biosynthetic process; GO:0003674,molecular_function; GO:0003824,catalytic activity; GO:0016740,transferase activity; GO:0016746,acyltransferase activity; GO:0016747,acyltransferase activity, transferring groups other than amino-acyl groups; GO:0008150,biological_process; GO:0008152,metabo…	PF00195.22:Chalcone and stilbene synthases, N-terminal domain	1.0739	0.7971	1.3933	1.956	1.0397	1.5608	71.0077	76.7161	74.9719	-0.312502	0.424197	0.560745	-5.90278	1.17e-205	6.72e-204	5.58749	8.94e-254	8.58e-252
Pcab131364	scaffold_2847	77970	80261	-	K00660 chalcone synthase [EC:2.3.1.74] | (RefSeq) chalcone synthase (A)	up	down	FALSE	ko00941: Flavonoid biosynthesis; ko00960: Tropane, piperidine and pyridine alkaloid biosynthesis; ko01100: Metabolic pathways; ko01110: Biosynthesis of secondary metabolites; ko04712: Circadian rhythm - plant	chalcone synthase [Pogostemon cablin]	CHSY_PERFR RecName: Full=Chalcone synthase; EC=2.3.1.74; AltName: Full=Naringenin-chalcone synthase;	A0A0C5D113_POGCB RecName: Full=Chalcone synthase {ECO:0000256|ARBA:ARBA00012975}; EC=2.3.1.74 {ECO:0000256|ARBA:ARBA00012975};	--	GO:0102128,chalcone synthase activity; GO:0016210,naringenin-chalcone synthase activity; GO:0009813,flavonoid biosynthetic process; GO:0003674,molecular_function; GO:0003824,catalytic activity; GO:0016740,transferase activity; GO:0016746,acyltransferase activity; GO:0016747,acyltransferase activity, transferring groups other than amino-acyl groups; GO:0008150,biological_process; GO:0008152,metabo…	PF00195.22:Chalcone and stilbene synthases, N-terminal domain	3.4431	4.5941	4.2225	2.749	3.6073	3.1083	58.5141	66.4812	71.0835	0.54537	0.0172141	0.0424016	-3.80881	8.74e-181	4.27e-179	4.35989	1.21e-219	9.05e-218
Pcab136766	scaffold_3391	66054	74409	-	K00660 chalcone synthase [EC:2.3.1.74] | (RefSeq) chalcone synthase (A)	up	down	up	ko00941: Flavonoid biosynthesis; ko00960: Tropane, piperidine and pyridine alkaloid biosynthesis; ko01100: Metabolic pathways; ko01110: Biosynthesis of secondary metabolites; ko04712: Circadian rhythm - plant	chalcone synthase-like protein [Pogostemon cablin]	CHSY_PERFR RecName: Full=Chalcone synthase; EC=2.3.1.74; AltName: Full=Naringenin-chalcone synthase;	A0A0C5CK32_POGCB RecName: Full=Chalcone synthase {ECO:0000256|ARBA:ARBA00012975}; EC=2.3.1.74 {ECO:0000256|ARBA:ARBA00012975};	--	GO:0102128,chalcone synthase activity; GO:0016210,naringenin-chalcone synthase activity; GO:0009813,flavonoid biosynthetic process; GO:0003674,molecular_function; GO:0003824,catalytic activity; GO:0016740,transferase activity; GO:0016746,acyltransferase activity; GO:0016747,acyltransferase activity, transferring groups other than amino-acyl groups; GO:0008150,biological_process; GO:0008152,metabo…	PF00195.22:Chalcone and stilbene synthases, N-terminal domain	37.1952	33.9793	35.3139	10.1059	9.4831	12.0378	91.6373	90.4268	96.4823	1.92429	1.22e-57	5.88e-56	-1.19415	2.45e-44	2.67e-43	3.12263	3.27e-189	2.02e-187
novel.17316	scaffold_779	182975	184176	.	K00660 chalcone synthase [EC:2.3.1.74] | (RefSeq) chalcone synthase 1-like (A)	FALSE	down	FALSE	ko00941: Flavonoid biosynthesis; ko00960: Tropane, piperidine and pyridine alkaloid biosynthesis; ko01100: Metabolic pathways; ko01110: Biosynthesis of secondary metabolites; ko04712: Circadian rhythm - plant	PREDICTED: chalcone synthase 1-like [Daucus carota subsp. sativus]	PKS4_RUBID RecName: Full=Polyketide synthase 4; Short=RiPKS4; EC=2.3.1.212 {ECO:0000269|PubMed:12226219, ECO:0000269|PubMed:18068110}; EC=2.3.1.74 {ECO:0000269|PubMed:12226219, ECO:0000269|PubMed:18068110}; AltName: Full=Benzalacetone synthase PKS4; Short=RiBAS; AltName: Full=Naringenin-chalcone synthase PKS4;	Q84YC2_9ERIC SubName: Full=Chalcone synthase {ECO:0000313|EMBL:AAO43490.1}; Flags: Fragment;	--	GO:0102128,chalcone synthase activity; GO:0016210,naringenin-chalcone synthase activity; GO:0042803,protein homodimerization activity; GO:0009813,flavonoid biosynthetic process; GO:0003674,molecular_function; GO:0003824,catalytic activity; GO:0016740,transferase activity; GO:0016746,acyltransferase activity; GO:0016747,acyltransferase activity, transferring groups other than amino-acyl groups; GO…	PF00195.22:Chalcone and stilbene synthases, N-terminal domain	0.1739	0.6402	0.2982	1.1612	0.7855	0.8857	1.536	1.0364	0.9194	-1.17842	0.0598858	0.121351	-1.45159	0.0224605	0.0342143	0.274239	0.567958	0.639137
novel.419	scaffold_1031	251251	252263	+	K00660 chalcone synthase [EC:2.3.1.74] | (RefSeq) polyketide synthase 5 (A)	up	down	NA	ko00941: Flavonoid biosynthesis; ko00960: Tropane, piperidine and pyridine alkaloid biosynthesis; ko01100: Metabolic pathways; ko01110: Biosynthesis of secondary metabolites; ko04712: Circadian rhythm - plant	hypothetical protein SADUNF_Sadunf01G0039100 [Salix dunnii]	CHS1_CASGL RecName: Full=Chalcone synthase; EC=2.3.1.74; AltName: Full=Naringenin-chalcone synthase;	A0A835N9W2_9ROSI RecName: Full=Chal_sti_synt_N domain-containing protein {ECO:0000259|Pfam:PF00195};	--	GO:0102128,chalcone synthase activity; GO:0016210,naringenin-chalcone synthase activity; GO:0009813,flavonoid biosynthetic process; GO:0003674,molecular_function; GO:0003824,catalytic activity; GO:0016740,transferase activity; GO:0016746,acyltransferase activity; GO:0016747,acyltransferase activity, transferring groups other than amino-acyl groups; GO:0008150,biological_process; GO:0008152,metabo…	PF00195.22:Chalcone and stilbene synthases, N-terminal domain	0.3333	0.3347	0	0	0.1613	0.1592	9.6754	7.7135	5.8544	NA	NA	NA	-4.91118	2.83e-09	9.15e-09	6.18337	1.4e-08	5e-08
novel.5870	scaffold_1878	229318	229958	.	K00660 chalcone synthase [EC:2.3.1.74] | (RefSeq) chalcone synthase 1 isoform X1 (A)	down	up	FALSE	ko00941: Flavonoid biosynthesis; ko00960: Tropane, piperidine and pyridine alkaloid biosynthesis; ko01100: Metabolic pathways; ko01110: Biosynthesis of secondary metabolites; ko04712: Circadian rhythm - plant	chalcone synthase, partial [Adenostyles leucophylla]	CHSY_ANTMA RecName: Full=Chalcone synthase; EC=2.3.1.74; AltName: Full=Naringenin-chalcone synthase;	R9WPT1_9ASTR SubName: Full=Chalcone synthase {ECO:0000313|EMBL:AGO01212.1}; Flags: Fragment;	--	GO:0102128,chalcone synthase activity; GO:0016210,naringenin-chalcone synthase activity; GO:0009813,flavonoid biosynthetic process; GO:0003674,molecular_function; GO:0003824,catalytic activity; GO:0016740,transferase activity; GO:0016746,acyltransferase activity; GO:0016747,acyltransferase activity, transferring groups other than amino-acyl groups; GO:0008150,biological_process; GO:0008152,metabo…	PF00195.22:Chalcone and stilbene synthases, N-terminal domain	2.9344	2.1826	2.1248	1.6826	1.6834	1.9722	0.1372	0	0	0.614305	0.160515	0.268834	5.95263	4.2e-06	1.02e-05	-5.33415	5.71e-05	0.00014178
novel.7255	scaffold_215	66940	67821	.	K00660 chalcone synthase [EC:2.3.1.74] | (RefSeq) chalcone synthase J-like (A)	down	NA	down	ko00941: Flavonoid biosynthesis; ko00960: Tropane, piperidine and pyridine alkaloid biosynthesis; ko01100: Metabolic pathways; ko01110: Biosynthesis of secondary metabolites; ko04712: Circadian rhythm - plant	chalcone synthase, partial [Scutellaria altissima]	CHSY_PERFR RecName: Full=Chalcone synthase; EC=2.3.1.74; AltName: Full=Naringenin-chalcone synthase;	L0CNP1_SCUAT RecName: Full=Chalcone synthase {ECO:0000256|ARBA:ARBA00012975}; EC=2.3.1.74 {ECO:0000256|ARBA:ARBA00012975}; Flags: Fragment;	--	GO:0102128,chalcone synthase activity; GO:0016210,naringenin-chalcone synthase activity; GO:0009813,flavonoid biosynthetic process; GO:0003674,molecular_function; GO:0003824,catalytic activity; GO:0016740,transferase activity; GO:0016746,acyltransferase activity; GO:0016747,acyltransferase activity, transferring groups other than amino-acyl groups; GO:0008150,biological_process; GO:0008152,metabo…	PF00195.22:Chalcone and stilbene synthases, N-terminal domain	0.3949	0.3172	0.3251	2.3018	3.1351	2.7912	0	0.1662	0.0895	-2.81422	4.17e-07	2.54e-06	NA	NA	NA	-4.9499	1.24e-07	4.09e-07
caffeoyl-CoA	p-coumaroyl quinic acid	p-coumaroyl shikimic acid	EC:2.3.1.133 shikimate O-hydroxycinnamoyltransferase
Pcab004208	scaffold_158	1639	2901	-	K13065 shikimate O-hydroxycinnamoyltransferase [EC:2.3.1.133] | (RefSeq) vinorine synthase-like (A)	down	up	up	ko00940: Phenylpropanoid biosynthesis; ko00941: Flavonoid biosynthesis; ko00945: Stilbenoid, diarylheptanoid and gingerol biosynthesis; ko01100: Metabolic pathways; ko01110: Biosynthesis of secondary metabolites	hypothetical protein Pfo_022630 [Paulownia fortunei]	SAT_CATRO RecName: Full=Stemmadenine O-acetyltransferase {ECO:0000303|PubMed:29511102}; Short=CrSAT {ECO:0000303|PubMed:29511102}; EC=1.7.1.- {ECO:0000269|PubMed:29511102};	A0A6I9UI53_SESIN SubName: Full=vinorine synthase-like {ECO:0000313|RefSeq:XP_011098395.1};	--	GO:0016746,acyltransferase activity; GO:0016491,oxidoreductase activity; GO:0009820,alkaloid metabolic process; GO:0003674,molecular_function; GO:0003824,catalytic activity; GO:0016740,transferase activity; GO:0006807,nitrogen compound metabolic process; GO:0008150,biological_process; GO:0008152,metabolic process; GO:0071704,organic substance metabolic process; GO:1901564,organonitrogen compound …	PF02458.18:Transferase family	7.6117	7.5326	6.5271	1.3563	1.1214	2.3706	0	0	0.0625	2.33529	1.45e-19	2.21e-18	8.51145	1.29e-12	5.24e-12	-6.17118	1.34e-06	3.99e-06
Pcab013002	scaffold_15	1379427	1380821	+	K13065 shikimate O-hydroxycinnamoyltransferase [EC:2.3.1.133] | (RefSeq) vinorine synthase-like (A)	down	up	FALSE	ko00940: Phenylpropanoid biosynthesis; ko00941: Flavonoid biosynthesis; ko00945: Stilbenoid, diarylheptanoid and gingerol biosynthesis; ko01100: Metabolic pathways; ko01110: Biosynthesis of secondary metabolites	hypothetical protein Pfo_021367 [Paulownia fortunei]	SALAT_PAPSO RecName: Full=Salutaridinol 7-O-acetyltransferase {ECO:0000303|PubMed:11404355}; Short=salAT {ECO:0000303|PubMed:11404355}; EC=2.3.1.150 {ECO:0000269|PubMed:11404355, ECO:0000269|PubMed:8537369};	A0A830BH86_9LAMI SubName: Full=Salutaridinol 7-o-acetyltransferase {ECO:0000313|EMBL:GFP86940.1};	--	GO:0047180,salutaridinol 7-O-acetyltransferase activity; GO:0009820,alkaloid metabolic process; GO:0003674,molecular_function; GO:0003824,catalytic activity; GO:0008374,O-acyltransferase activity; GO:0016407,acetyltransferase activity; GO:0016413,O-acetyltransferase activity; GO:0016740,transferase activity; GO:0016746,acyltransferase activity; GO:0016747,acyltransferase activity, transferring gr…	PF02458.18:Transferase family	2.447	2.5574	2.1583	1.4553	2.3206	2.4802	0	0	0.1132	0.37065	0.219284	0.342606	6.16452	1.28e-08	3.94e-08	-5.79098	1.34e-07	4.39e-07
Pcab018115	scaffold_28_1_2102136	1904839	1906179	+	K13065 shikimate O-hydroxycinnamoyltransferase [EC:2.3.1.133] | (RefSeq) spermidine hydroxycinnamoyl transferase-like (A)	down	up	up	ko00940: Phenylpropanoid biosynthesis; ko00941: Flavonoid biosynthesis; ko00945: Stilbenoid, diarylheptanoid and gingerol biosynthesis; ko01100: Metabolic pathways; ko01110: Biosynthesis of secondary metabolites	hypothetical protein BUALT_Bualt12G0077000 [Buddleja alternifolia]	SHT_ARATH RecName: Full=Spermidine hydroxycinnamoyl transferase {ECO:0000303|PubMed:19077165}; Short=AtSHT {ECO:0000303|PubMed:33519864}; EC=2.3.1.- {ECO:0000269|PubMed:19077165}; AltName: Full=BAHD-like hydroxycinnamoyl transferase {ECO:0000303|PubMed:19077165};	A0A6I9SRK2_SESIN SubName: Full=spermidine hydroxycinnamoyl transferase-like {ECO:0000313|RefSeq:XP_011069658.1};	--	GO:0016747,acyltransferase activity, transferring groups other than amino-acyl groups; GO:0016410,N-acyltransferase activity; GO:0080074,spermidine:caffeoyl CoA N-acyltransferase activity; GO:0080073,spermidine:coumaroyl CoA N-acyltransferase activity; GO:0080075,spermidine:feruloyl CoA N-acyltransferase activity; GO:0080072,spermidine:sinapoyl CoA N-acyltransferase activity; GO:0009555,pollen de…	PF02458.18:Transferase family	129.51	128.169	132.037	68.3156	73.2267	69.1649	2.2947	3.224	2.2958	1.05912	3.43e-83	2.6e-81	5.82011	0	0	-4.75798	5.06e-217	3.76e-215
Pcab020069	scaffold_69	1970480	1987190	-	K13065 shikimate O-hydroxycinnamoyltransferase [EC:2.3.1.133] | (RefSeq) shikimate O-hydroxycinnamoyltransferase (A)	down	up	FALSE	ko00940: Phenylpropanoid biosynthesis; ko00941: Flavonoid biosynthesis; ko00945: Stilbenoid, diarylheptanoid and gingerol biosynthesis; ko01100: Metabolic pathways; ko01110: Biosynthesis of secondary metabolites	hydroxycinnamoyl-CoA shikimate/quinate hydroxycinnamoyl transferase [Perilla frutescens var. frutescens]	HST_TOBAC RecName: Full=Shikimate O-hydroxycinnamoyltransferase; EC=2.3.1.133; AltName: Full=Hydroxycinnamoyl transferase; AltName: Full=Hydroxycinnamoyl-Coenzyme A shikimate/quinate hydroxycinnamoyltransferase;	A0A6I9THQ9_SESIN SubName: Full=shikimate O-hydroxycinnamoyltransferase {ECO:0000313|RefSeq:XP_011082506.1};	--	GO:0016747,acyltransferase activity, transferring groups other than amino-acyl groups; GO:0047172,shikimate O-hydroxycinnamoyltransferase activity; GO:0003674,molecular_function; GO:0003824,catalytic activity; GO:0016740,transferase activity; GO:0016746,acyltransferase activity; GO:0008374,O-acyltransferase activity; GO:0050734,hydroxycinnamoyltransferase activity; GO:0050737,O-hydroxycinnamoyltr…	PF02458.18:Transferase family	18.7035	21.452	21.5754	43.0596	46.7334	41.4562	8.7134	8.8696	7.3746	-0.917289	5.97e-34	1.58e-32	1.49949	8.26e-42	8.55e-41	-2.41278	4.18e-136	1.68e-134
Pcab020077	scaffold_69	2147167	2151052	+	K13065 shikimate O-hydroxycinnamoyltransferase [EC:2.3.1.133] | (RefSeq) shikimate O-hydroxycinnamoyltransferase (A)	NA	up	up	ko00940: Phenylpropanoid biosynthesis; ko00941: Flavonoid biosynthesis; ko00945: Stilbenoid, diarylheptanoid and gingerol biosynthesis; ko01100: Metabolic pathways; ko01110: Biosynthesis of secondary metabolites	hypothetical protein Pfo_020138 [Paulownia fortunei]	HST_TOBAC RecName: Full=Shikimate O-hydroxycinnamoyltransferase; EC=2.3.1.133; AltName: Full=Hydroxycinnamoyl transferase; AltName: Full=Hydroxycinnamoyl-Coenzyme A shikimate/quinate hydroxycinnamoyltransferase;	E8ZAP2_PLESU SubName: Full=Hydroxycinnamoyl transferase {ECO:0000313|EMBL:CBI83579.1}; EC=2.3.1.133 {ECO:0000313|EMBL:CBI83579.1};	--	GO:0016747,acyltransferase activity, transferring groups other than amino-acyl groups; GO:0047172,shikimate O-hydroxycinnamoyltransferase activity; GO:0003674,molecular_function; GO:0003824,catalytic activity; GO:0016740,transferase activity; GO:0016746,acyltransferase activity; GO:0008374,O-acyltransferase activity; GO:0050734,hydroxycinnamoyltransferase activity; GO:0050737,O-hydroxycinnamoyltr…	PF02458.18:Transferase family	1.2449	1.8751	1.9749	0.3779	0.6528	0.8422	0	0	0	1.61875	0.000246622	0.000973087	7.47032	3.31e-09	1.07e-08	NA	NA	NA
Pcab020079	scaffold_69	2207912	2210042	-	K13065 shikimate O-hydroxycinnamoyltransferase [EC:2.3.1.133] | (RefSeq) shikimate O-hydroxycinnamoyltransferase isoform X1 (A)	down	up	up	ko00940: Phenylpropanoid biosynthesis; ko00941: Flavonoid biosynthesis; ko00945: Stilbenoid, diarylheptanoid and gingerol biosynthesis; ko01100: Metabolic pathways; ko01110: Biosynthesis of secondary metabolites	hypothetical protein Pfo_020138 [Paulownia fortunei]	RAS_PLESU RecName: Full=Rosmarinate synthase; Short=CbRAS; EC=2.3.1.140; AltName: Full=Hydroxycinnamoyl transferase; Short=CbHCT1;	M4T4A3_PERFR SubName: Full=Rosmarinic acid synthase {ECO:0000313|EMBL:AGH61997.1};	--	GO:0050266,rosmarinate synthase activity; GO:0003674,molecular_function; GO:0003824,catalytic activity; GO:0016740,transferase activity; GO:0016746,acyltransferase activity; GO:0016747,acyltransferase activity, transferring groups other than amino-acyl groups	PF02458.18:Transferase family	4.8402	4.3395	5.3957	2.099	1.0041	2.5315	0	0	0	1.54201	1.23e-07	8e-07	8.83675	2.95e-13	1.24e-12	-7.2877	1.08e-08	3.89e-08
Pcab023855	scaffold_167	1666145	1667428	+	K13065 shikimate O-hydroxycinnamoyltransferase [EC:2.3.1.133] | (RefSeq) vinorine synthase-like (A)	down	up	up	ko00940: Phenylpropanoid biosynthesis; ko00941: Flavonoid biosynthesis; ko00945: Stilbenoid, diarylheptanoid and gingerol biosynthesis; ko01100: Metabolic pathways; ko01110: Biosynthesis of secondary metabolites	hypothetical protein Pfo_022630 [Paulownia fortunei]	SAT_CATRO RecName: Full=Stemmadenine O-acetyltransferase {ECO:0000303|PubMed:29511102}; Short=CrSAT {ECO:0000303|PubMed:29511102}; EC=1.7.1.- {ECO:0000269|PubMed:29511102};	A0A6I9UI53_SESIN SubName: Full=vinorine synthase-like {ECO:0000313|RefSeq:XP_011098395.1};	--	GO:0016746,acyltransferase activity; GO:0016491,oxidoreductase activity; GO:0009820,alkaloid metabolic process; GO:0003674,molecular_function; GO:0003824,catalytic activity; GO:0016740,transferase activity; GO:0006807,nitrogen compound metabolic process; GO:0008150,biological_process; GO:0008152,metabolic process; GO:0071704,organic substance metabolic process; GO:1901564,organonitrogen compound …	PF02458.18:Transferase family	14.1064	16.5077	15.3531	5.0398	4.1495	4.0937	0	0	0.123	1.96072	6.8e-35	1.85e-33	8.72652	2.86e-17	1.47e-16	-6.76027	1.71e-10	7.08e-10
Pcab026326	scaffold_7_898318_5598691	3629649	3630905	+	K13065 shikimate O-hydroxycinnamoyltransferase [EC:2.3.1.133] | (RefSeq) vinorine synthase-like isoform X3 (A)	down	up	up	ko00940: Phenylpropanoid biosynthesis; ko00941: Flavonoid biosynthesis; ko00945: Stilbenoid, diarylheptanoid and gingerol biosynthesis; ko01100: Metabolic pathways; ko01110: Biosynthesis of secondary metabolites	hypothetical protein Pfo_009291 [Paulownia fortunei]	SAT_CATRO RecName: Full=Stemmadenine O-acetyltransferase {ECO:0000303|PubMed:29511102}; Short=CrSAT {ECO:0000303|PubMed:29511102}; EC=1.7.1.- {ECO:0000269|PubMed:29511102};	A0A6I9SMU1_SESIN SubName: Full=vinorine synthase-like {ECO:0000313|RefSeq:XP_011071304.1};	--	GO:0016746,acyltransferase activity; GO:0016491,oxidoreductase activity; GO:0009820,alkaloid metabolic process; GO:0003674,molecular_function; GO:0003824,catalytic activity; GO:0016740,transferase activity; GO:0006807,nitrogen compound metabolic process; GO:0008150,biological_process; GO:0008152,metabolic process; GO:0071704,organic substance metabolic process; GO:1901564,organonitrogen compound …	PF02458.18:Transferase family	61.2955	58.3778	63.3589	20.441	20.8714	22.3372	2.7278	1.7489	1.884	1.69611	1.72e-97	1.63e-95	5.0576	4.21e-193	2.23e-191	-3.35513	2.67e-65	4.89e-64
Pcab034642	scaffold_27	394672	405604	-	K13065 shikimate O-hydroxycinnamoyltransferase [EC:2.3.1.133] | (RefSeq) agmatine coumaroyltransferase-2-like (A)	down	up	FALSE	ko00940: Phenylpropanoid biosynthesis; ko00941: Flavonoid biosynthesis; ko00945: Stilbenoid, diarylheptanoid and gingerol biosynthesis; ko01100: Metabolic pathways; ko01110: Biosynthesis of secondary metabolites	hypothetical protein Pfo_000153 [Paulownia fortunei]	CFAT_PETHY RecName: Full=Coniferyl alcohol acyltransferase {ECO:0000303|PubMed:17241449}; Short=PhCFAT {ECO:0000303|PubMed:17241449}; EC=2.3.1.- {ECO:0000269|PubMed:17241449}; AltName: Full=(E)-cinnamyl alcohol acyltransferase {ECO:0000303|PubMed:17241449}; EC=2.3.1.224 {ECO:0000269|PubMed:17241449}; AltName: Full=(E)-sinapoyl alcohol acyltransferase {ECO:0000303|PubMed:17241449}; EC=2.3.1.- {ECO…	A0A6I9U1M1_SESIN SubName: Full=shikimate O-hydroxycinnamoyltransferase-like {ECO:0000313|RefSeq:XP_011094024.1};	--	GO:0102387,2-phenylethanol acetyltransferase activity; GO:0102720,acetyl-coenzyme A:acetyl alcohol acetyltransferase activity; GO:0034318,alcohol O-acyltransferase activity; GO:0007623,circadian rhythm; GO:0010597,green leaf volatile biosynthetic process; GO:0009699,phenylpropanoid biosynthetic process; GO:0009723,response to ethylene; GO:0003674,molecular_function; GO:0003824,catalytic activity;…	PF02458.18:Transferase family	3.0554	2.9147	3.1441	2.5739	2.4404	2.1157	0.1928	0.1607	0.5193	0.524955	0.101949	0.187147	3.57487	2.35e-09	7.64e-09	-3.04522	1.17e-06	3.5e-06
Pcab040027	scaffold_143	810266	810637	+	K13065 shikimate O-hydroxycinnamoyltransferase [EC:2.3.1.133] | (RefSeq) rosmarinate synthase-like (A)	down	FALSE	FALSE	ko00940: Phenylpropanoid biosynthesis; ko00941: Flavonoid biosynthesis; ko00945: Stilbenoid, diarylheptanoid and gingerol biosynthesis; ko01100: Metabolic pathways; ko01110: Biosynthesis of secondary metabolites	hydroxycinnamoyl-CoA shikimate/quinate hydroxycinnamoyl transferase [Perilla frutescens var. frutescens]	RAS_PLESU RecName: Full=Rosmarinate synthase; Short=CbRAS; EC=2.3.1.140; AltName: Full=Hydroxycinnamoyl transferase; Short=CbHCT1;	A0A4D9ANI6_SALSN SubName: Full=Uncharacterized protein {ECO:0000313|EMBL:TEY59105.1};	--	GO:0050266,rosmarinate synthase activity; GO:0003674,molecular_function; GO:0003824,catalytic activity; GO:0016740,transferase activity; GO:0016746,acyltransferase activity; GO:0016747,acyltransferase activity, transferring groups other than amino-acyl groups	PF02458.18:Transferase family	14.607	13.1632	14.4526	19.4421	22.481	20.5687	7.7994	9.4552	14.2177	-0.393376	0.0532495	0.110142	0.611264	0.0282295	0.0422717	-1.00035	6.39e-05	0.000157676
Pcab040028	scaffold_143	823497	830870	-	K13065 shikimate O-hydroxycinnamoyltransferase [EC:2.3.1.133] | (RefSeq) shikimate O-hydroxycinnamoyltransferase (A)	down	up	FALSE	ko00940: Phenylpropanoid biosynthesis; ko00941: Flavonoid biosynthesis; ko00945: Stilbenoid, diarylheptanoid and gingerol biosynthesis; ko01100: Metabolic pathways; ko01110: Biosynthesis of secondary metabolites	hydroxycinnamoyl-CoA shikimate/quinate hydroxycinnamoyl transferase [Perilla frutescens var. frutescens]	HST_TOBAC RecName: Full=Shikimate O-hydroxycinnamoyltransferase; EC=2.3.1.133; AltName: Full=Hydroxycinnamoyl transferase; AltName: Full=Hydroxycinnamoyl-Coenzyme A shikimate/quinate hydroxycinnamoyltransferase;	A0A6I9THQ9_SESIN SubName: Full=shikimate O-hydroxycinnamoyltransferase {ECO:0000313|RefSeq:XP_011082506.1};	--	GO:0016747,acyltransferase activity, transferring groups other than amino-acyl groups; GO:0047172,shikimate O-hydroxycinnamoyltransferase activity; GO:0003674,molecular_function; GO:0003824,catalytic activity; GO:0016740,transferase activity; GO:0016746,acyltransferase activity; GO:0008374,O-acyltransferase activity; GO:0050734,hydroxycinnamoyltransferase activity; GO:0050737,O-hydroxycinnamoyltr…	PF02458.18:Transferase family	42.6402	45.8192	44.9297	57.1378	63.1016	56.354	9.7799	10.5511	11.4554	-0.233264	0.000529421	0.00194585	2.25955	4.69e-115	1.31e-113	-2.48898	1.29e-139	5.36e-138
Pcab041599	scaffold_65	1643291	1653049	-	K13065 shikimate O-hydroxycinnamoyltransferase [EC:2.3.1.133] | (RefSeq) agmatine coumaroyltransferase-2-like (A)	down	NA	down	ko00940: Phenylpropanoid biosynthesis; ko00941: Flavonoid biosynthesis; ko00945: Stilbenoid, diarylheptanoid and gingerol biosynthesis; ko01100: Metabolic pathways; ko01110: Biosynthesis of secondary metabolites	hypothetical protein Pfo_023278 [Paulownia fortunei]	CFAT_PETHY RecName: Full=Coniferyl alcohol acyltransferase {ECO:0000303|PubMed:17241449}; Short=PhCFAT {ECO:0000303|PubMed:17241449}; EC=2.3.1.- {ECO:0000269|PubMed:17241449}; AltName: Full=(E)-cinnamyl alcohol acyltransferase {ECO:0000303|PubMed:17241449}; EC=2.3.1.224 {ECO:0000269|PubMed:17241449}; AltName: Full=(E)-sinapoyl alcohol acyltransferase {ECO:0000303|PubMed:17241449}; EC=2.3.1.- {ECO…	A0A8M8V7M9_SESIN SubName: Full=shikimate O-hydroxycinnamoyltransferase-like {ECO:0000313|RefSeq:XP_020552106.1};	--	GO:0102387,2-phenylethanol acetyltransferase activity; GO:0102720,acetyl-coenzyme A:acetyl alcohol acetyltransferase activity; GO:0034318,alcohol O-acyltransferase activity; GO:0007623,circadian rhythm; GO:0010597,green leaf volatile biosynthetic process; GO:0009699,phenylpropanoid biosynthetic process; GO:0009723,response to ethylene; GO:0003674,molecular_function; GO:0003824,catalytic activity;…	PF02458.18:Transferase family	0.4157	0.3578	0.4278	2.3798	3.3923	2.0987	0	0	0	-2.54113	9.7e-08	6.38e-07	NA	NA	NA	-7.72997	5.01e-10	2e-09
Pcab057097	scaffold_651	479728	482258	+	K13065 shikimate O-hydroxycinnamoyltransferase [EC:2.3.1.133] | (RefSeq) acyltransferase Pun1-like (A)	down	FALSE	down	ko00940: Phenylpropanoid biosynthesis; ko00941: Flavonoid biosynthesis; ko00945: Stilbenoid, diarylheptanoid and gingerol biosynthesis; ko01100: Metabolic pathways; ko01110: Biosynthesis of secondary metabolites	hypothetical protein C2S51_018792 [Perilla frutescens var. frutescens]	CIA2_ARATH RecName: Full=Protein CHLOROPLAST IMPORT APPARATUS 2; Flags: Precursor;	A0A4D9A1W6_SALSN RecName: Full=CCT domain-containing protein {ECO:0000259|PROSITE:PS51017};	GATA-4/5/6 transcription factors	GO:0009507,chloroplast; GO:0005634,nucleus; GO:0045036,protein targeting to chloroplast; GO:0006355,regulation of DNA-templated transcription; GO:0006605,protein targeting; GO:0006810,transport; GO:0006886,intracellular protein transport; GO:0008104,protein localization; GO:0008150,biological_process; GO:0009987,cellular process; GO:0015031,protein transport; GO:0033036,macromolecule localization…	PF06203.17:CCT motif	3.0401	1.7537	2.4627	6.4798	9.3306	7.2898	2.7756	1.701	2.4188	-1.49764	7.15e-09	5.34e-08	0.274605	0.451891	0.513581	-1.77139	6.13e-11	2.61e-10
Pcab063526	scaffold_763	259195	260535	+	K13065 shikimate O-hydroxycinnamoyltransferase [EC:2.3.1.133] | (RefSeq) spermidine hydroxycinnamoyl transferase-like (A)	down	up	up	ko00940: Phenylpropanoid biosynthesis; ko00941: Flavonoid biosynthesis; ko00945: Stilbenoid, diarylheptanoid and gingerol biosynthesis; ko01100: Metabolic pathways; ko01110: Biosynthesis of secondary metabolites	hypothetical protein BUALT_Bualt12G0077000 [Buddleja alternifolia]	SHT_ARATH RecName: Full=Spermidine hydroxycinnamoyl transferase {ECO:0000303|PubMed:19077165}; Short=AtSHT {ECO:0000303|PubMed:33519864}; EC=2.3.1.- {ECO:0000269|PubMed:19077165}; AltName: Full=BAHD-like hydroxycinnamoyl transferase {ECO:0000303|PubMed:19077165};	A0A6I9SRK2_SESIN SubName: Full=spermidine hydroxycinnamoyl transferase-like {ECO:0000313|RefSeq:XP_011069658.1};	--	GO:0016747,acyltransferase activity, transferring groups other than amino-acyl groups; GO:0016410,N-acyltransferase activity; GO:0080074,spermidine:caffeoyl CoA N-acyltransferase activity; GO:0080073,spermidine:coumaroyl CoA N-acyltransferase activity; GO:0080075,spermidine:feruloyl CoA N-acyltransferase activity; GO:0080072,spermidine:sinapoyl CoA N-acyltransferase activity; GO:0009555,pollen de…	PF02458.18:Transferase family	183.017	193.48	179.988	74.324	77.2501	73.3327	1.7046	2.2404	2.8845	1.47897	1.77e-171	4.11e-169	6.53033	0	0	-5.04787	7.92e-225	6.25e-223
Pcab069958	scaffold_837	126493	129200	-	K13065 shikimate O-hydroxycinnamoyltransferase [EC:2.3.1.133] | (RefSeq) acyltransferase Pun1-like (A)	FALSE	FALSE	down	ko00940: Phenylpropanoid biosynthesis; ko00941: Flavonoid biosynthesis; ko00945: Stilbenoid, diarylheptanoid and gingerol biosynthesis; ko01100: Metabolic pathways; ko01110: Biosynthesis of secondary metabolites	hypothetical protein C2S51_018792 [Perilla frutescens var. frutescens]	COL7_ARATH RecName: Full=Zinc finger protein CONSTANS-LIKE 7;	A0A4D9A1W6_SALSN RecName: Full=CCT domain-containing protein {ECO:0000259|PROSITE:PS51017};	GATA-4/5/6 transcription factors	GO:0005730,nucleolus; GO:0005634,nucleus; GO:0003700,DNA-binding transcription factor activity; GO:0000976,transcription cis-regulatory region binding; GO:0008270,zinc ion binding; GO:0045893,positive regulation of DNA-templated transcription; GO:0006355,regulation of DNA-templated transcription; GO:0010223,secondary shoot formation; GO:0009641,shade avoidance; GO:0003674,molecular_function; GO:0…	PF06203.17:CCT motif	2.7192	5.331	4.397	19.1036	15.7952	15.7063	9.7235	9.1257	9.0972	-1.85384	3.3e-21	5.47e-20	-0.974905	3.72e-05	8.19e-05	-0.875807	2.02e-08	7.12e-08
Pcab072367	scaffold_518	8010	9323	+	K13065 shikimate O-hydroxycinnamoyltransferase [EC:2.3.1.133] | (RefSeq) spermidine hydroxycinnamoyl transferase-like (A)	down	up	up	ko00940: Phenylpropanoid biosynthesis; ko00941: Flavonoid biosynthesis; ko00945: Stilbenoid, diarylheptanoid and gingerol biosynthesis; ko01100: Metabolic pathways; ko01110: Biosynthesis of secondary metabolites	hypothetical protein BUALT_Bualt12G0077000 [Buddleja alternifolia]	SHT_ARATH RecName: Full=Spermidine hydroxycinnamoyl transferase {ECO:0000303|PubMed:19077165}; Short=AtSHT {ECO:0000303|PubMed:33519864}; EC=2.3.1.- {ECO:0000269|PubMed:19077165}; AltName: Full=BAHD-like hydroxycinnamoyl transferase {ECO:0000303|PubMed:19077165};	A0A6I9SRK2_SESIN SubName: Full=spermidine hydroxycinnamoyl transferase-like {ECO:0000313|RefSeq:XP_011069658.1};	--	GO:0016747,acyltransferase activity, transferring groups other than amino-acyl groups; GO:0016410,N-acyltransferase activity; GO:0080074,spermidine:caffeoyl CoA N-acyltransferase activity; GO:0080073,spermidine:coumaroyl CoA N-acyltransferase activity; GO:0080075,spermidine:feruloyl CoA N-acyltransferase activity; GO:0080072,spermidine:sinapoyl CoA N-acyltransferase activity; GO:0009555,pollen de…	PF02458.18:Transferase family	274.68	268.846	271.519	95.6951	103.32	91.9038	4.8844	6.6921	5.7072	1.65805	1.39e-226	5.32e-224	5.74129	0	0	-4.08098	6.61e-260	6.58e-258
Pcab074409	scaffold_597	637732	638988	-	K13065 shikimate O-hydroxycinnamoyltransferase [EC:2.3.1.133] | (RefSeq) vinorine synthase-like isoform X3 (A)	down	up	up	ko00940: Phenylpropanoid biosynthesis; ko00941: Flavonoid biosynthesis; ko00945: Stilbenoid, diarylheptanoid and gingerol biosynthesis; ko01100: Metabolic pathways; ko01110: Biosynthesis of secondary metabolites	hypothetical protein Pfo_009291 [Paulownia fortunei]	SAT_CATRO RecName: Full=Stemmadenine O-acetyltransferase {ECO:0000303|PubMed:29511102}; Short=CrSAT {ECO:0000303|PubMed:29511102}; EC=1.7.1.- {ECO:0000269|PubMed:29511102};	A0A6I9SMU1_SESIN SubName: Full=vinorine synthase-like {ECO:0000313|RefSeq:XP_011071304.1};	--	GO:0016746,acyltransferase activity; GO:0016491,oxidoreductase activity; GO:0009820,alkaloid metabolic process; GO:0003674,molecular_function; GO:0003824,catalytic activity; GO:0016740,transferase activity; GO:0006807,nitrogen compound metabolic process; GO:0008150,biological_process; GO:0008152,metabolic process; GO:0071704,organic substance metabolic process; GO:1901564,organonitrogen compound …	PF02458.18:Transferase family	83.7409	77.0209	81.0948	40.68	36.7529	40.2282	3.2174	3.2646	3.2656	1.21138	6.72e-67	3.93e-65	4.82551	1.48e-254	1.17e-252	-3.60968	2.52e-121	8.99e-120
Pcab080210	scaffold_1292	339759	341833	+	K13065 shikimate O-hydroxycinnamoyltransferase [EC:2.3.1.133] | (RefSeq) acyltransferase Pun1-like (A)	down	NA	down	ko00940: Phenylpropanoid biosynthesis; ko00941: Flavonoid biosynthesis; ko00945: Stilbenoid, diarylheptanoid and gingerol biosynthesis; ko01100: Metabolic pathways; ko01110: Biosynthesis of secondary metabolites	hypothetical protein C2S51_018792 [Perilla frutescens var. frutescens]	COL7_ARATH RecName: Full=Zinc finger protein CONSTANS-LIKE 7;	A0A5A7QRG2_STRAF SubName: Full=CONSTANS-like zinc finger protein {ECO:0000313|EMBL:GER47458.1};	GATA-4/5/6 transcription factors	GO:0005730,nucleolus; GO:0005634,nucleus; GO:0003700,DNA-binding transcription factor activity; GO:0000976,transcription cis-regulatory region binding; GO:0008270,zinc ion binding; GO:0045893,positive regulation of DNA-templated transcription; GO:0006355,regulation of DNA-templated transcription; GO:0010223,secondary shoot formation; GO:0009641,shade avoidance; GO:0003674,molecular_function; GO:0…	PF06203.17:CCT motif	0.8522	0.4278	0.4384	2.3282	2.475	1.933	0.1344	0.4482	1.3277	-1.79612	0.00244674	0.00772797	NA	NA	NA	-1.81526	0.00472699	0.00893202
Pcab089256	scaffold_1372	280891	281374	+	K13065 shikimate O-hydroxycinnamoyltransferase [EC:2.3.1.133] | (RefSeq) spermidine hydroxycinnamoyl transferase-like (A)	down	up	FALSE	ko00940: Phenylpropanoid biosynthesis; ko00941: Flavonoid biosynthesis; ko00945: Stilbenoid, diarylheptanoid and gingerol biosynthesis; ko01100: Metabolic pathways; ko01110: Biosynthesis of secondary metabolites	hypothetical protein Pfo_011341 [Paulownia fortunei]	EPS1_ARATH RecName: Full=Protein ENHANCED PSEUDOMONAS SUSCEPTIBILITY 1 {ECO:0000303|PubMed:19036031}; EC=2.3.1.- {ECO:0000305};	A0A2G9GJX3_9LAMI SubName: Full=Shikimate O-hydroxycinnamoyltransferase {ECO:0000313|EMBL:PIN05573.1}; EC=2.3.1.133 {ECO:0000313|EMBL:PIN05573.1};	--	GO:0016746,acyltransferase activity; GO:0006952,defense response; GO:1900424,regulation of defense response to bacterium; GO:1900150,regulation of defense response to fungus; GO:0009617,response to bacterium; GO:0009753,response to jasmonic acid; GO:0009697,salicylic acid biosynthetic process; GO:0003674,molecular_function; GO:0003824,catalytic activity; GO:0016740,transferase activity; GO:000695…	PF02458.18:Transferase family	5.1988	8.0046	7.3112	7.7331	6.0397	6.7859	0.2187	0	0	0.16645	0.596208	0.714172	6.77837	5.54e-08	1.61e-07	-6.60737	1.08e-07	3.58e-07
Pcab089566	scaffold_866	450670	452073	+	K13065 shikimate O-hydroxycinnamoyltransferase [EC:2.3.1.133] | (RefSeq) vinorine synthase-like (A)	down	up	up	ko00940: Phenylpropanoid biosynthesis; ko00941: Flavonoid biosynthesis; ko00945: Stilbenoid, diarylheptanoid and gingerol biosynthesis; ko01100: Metabolic pathways; ko01110: Biosynthesis of secondary metabolites	hypothetical protein Pfo_021367 [Paulownia fortunei]	SALAT_PAPSO RecName: Full=Salutaridinol 7-O-acetyltransferase {ECO:0000303|PubMed:11404355}; Short=salAT {ECO:0000303|PubMed:11404355}; EC=2.3.1.150 {ECO:0000269|PubMed:11404355, ECO:0000269|PubMed:8537369};	A0A2G9G9Q6_9LAMI SubName: Full=Salutaridinol 7-O-acetyltransferase {ECO:0000313|EMBL:PIN02019.1}; EC=2.3.1.150 {ECO:0000313|EMBL:PIN02019.1};	--	GO:0047180,salutaridinol 7-O-acetyltransferase activity; GO:0009820,alkaloid metabolic process; GO:0003674,molecular_function; GO:0003824,catalytic activity; GO:0008374,O-acyltransferase activity; GO:0016407,acetyltransferase activity; GO:0016413,O-acetyltransferase activity; GO:0016740,transferase activity; GO:0016746,acyltransferase activity; GO:0016747,acyltransferase activity, transferring gr…	PF02458.18:Transferase family	27.2404	27.2539	25.4268	9.3537	9.7514	10.9944	0.2505	0.3132	0.3936	1.58201	1.75e-46	6.66e-45	6.56719	1.05e-70	1.73e-69	-4.98169	1.12e-36	1.21e-35
Pcab089567	scaffold_866	455722	457110	-	K13065 shikimate O-hydroxycinnamoyltransferase [EC:2.3.1.133] | (RefSeq) vinorine synthase-like (A)	NA	up	up	ko00940: Phenylpropanoid biosynthesis; ko00941: Flavonoid biosynthesis; ko00945: Stilbenoid, diarylheptanoid and gingerol biosynthesis; ko01100: Metabolic pathways; ko01110: Biosynthesis of secondary metabolites	hypothetical protein Pfo_021367 [Paulownia fortunei]	SALAT_PAPSO RecName: Full=Salutaridinol 7-O-acetyltransferase {ECO:0000303|PubMed:11404355}; Short=salAT {ECO:0000303|PubMed:11404355}; EC=2.3.1.150 {ECO:0000269|PubMed:11404355, ECO:0000269|PubMed:8537369};	A0A830BH86_9LAMI SubName: Full=Salutaridinol 7-o-acetyltransferase {ECO:0000313|EMBL:GFP86940.1};	--	GO:0047180,salutaridinol 7-O-acetyltransferase activity; GO:0009820,alkaloid metabolic process; GO:0003674,molecular_function; GO:0003824,catalytic activity; GO:0008374,O-acyltransferase activity; GO:0016407,acetyltransferase activity; GO:0016413,O-acetyltransferase activity; GO:0016740,transferase activity; GO:0016746,acyltransferase activity; GO:0016747,acyltransferase activity, transferring gr…	PF02458.18:Transferase family	7.0717	6.7485	5.2125	0.5024	0.4856	0.5269	0.0633	0	0.1137	3.82457	8.22e-31	1.97e-29	6.98293	7.48e-16	3.6e-15	NA	NA	NA
Pcab098703	scaffold_435	336876	347625	+	K13065 shikimate O-hydroxycinnamoyltransferase [EC:2.3.1.133] | (RefSeq) agmatine hydroxycinnamoyltransferase 1-like (A)	down	FALSE	down	ko00940: Phenylpropanoid biosynthesis; ko00941: Flavonoid biosynthesis; ko00945: Stilbenoid, diarylheptanoid and gingerol biosynthesis; ko01100: Metabolic pathways; ko01110: Biosynthesis of secondary metabolites	hypothetical protein Pfo_023278 [Paulownia fortunei]	CFAT_PETHY RecName: Full=Coniferyl alcohol acyltransferase {ECO:0000303|PubMed:17241449}; Short=PhCFAT {ECO:0000303|PubMed:17241449}; EC=2.3.1.- {ECO:0000269|PubMed:17241449}; AltName: Full=(E)-cinnamyl alcohol acyltransferase {ECO:0000303|PubMed:17241449}; EC=2.3.1.224 {ECO:0000269|PubMed:17241449}; AltName: Full=(E)-sinapoyl alcohol acyltransferase {ECO:0000303|PubMed:17241449}; EC=2.3.1.- {ECO…	A0A2G9HBB1_9LAMI SubName: Full=Alcohol O-acetyltransferase {ECO:0000313|EMBL:PIN14815.1}; EC=2.3.1.84 {ECO:0000313|EMBL:PIN14815.1};	--	GO:0102387,2-phenylethanol acetyltransferase activity; GO:0102720,acetyl-coenzyme A:acetyl alcohol acetyltransferase activity; GO:0034318,alcohol O-acyltransferase activity; GO:0007623,circadian rhythm; GO:0010597,green leaf volatile biosynthetic process; GO:0009699,phenylpropanoid biosynthetic process; GO:0009723,response to ethylene; GO:0003674,molecular_function; GO:0003824,catalytic activity;…	PF02458.18:Transferase family	1.2011	1.1558	1.3904	6.563	6.4439	8.1735	0.6948	1.1055	0.5671	-2.32695	1.2e-19	1.84e-18	0.84757	0.0714348	0.098991	-3.16318	1.73e-24	1.35e-23
Pcab099326	scaffold_952	359170	360570	+	K13065 shikimate O-hydroxycinnamoyltransferase [EC:2.3.1.133] | (RefSeq) vinorine synthase-like (A)	down	up	up	ko00940: Phenylpropanoid biosynthesis; ko00941: Flavonoid biosynthesis; ko00945: Stilbenoid, diarylheptanoid and gingerol biosynthesis; ko01100: Metabolic pathways; ko01110: Biosynthesis of secondary metabolites	hypothetical protein Pfo_021367 [Paulownia fortunei]	SALAT_PAPSO RecName: Full=Salutaridinol 7-O-acetyltransferase {ECO:0000303|PubMed:11404355}; Short=salAT {ECO:0000303|PubMed:11404355}; EC=2.3.1.150 {ECO:0000269|PubMed:11404355, ECO:0000269|PubMed:8537369};	A0A830BH86_9LAMI SubName: Full=Salutaridinol 7-o-acetyltransferase {ECO:0000313|EMBL:GFP86940.1};	--	GO:0047180,salutaridinol 7-O-acetyltransferase activity; GO:0009820,alkaloid metabolic process; GO:0003674,molecular_function; GO:0003824,catalytic activity; GO:0008374,O-acyltransferase activity; GO:0016407,acetyltransferase activity; GO:0016413,O-acetyltransferase activity; GO:0016740,transferase activity; GO:0016746,acyltransferase activity; GO:0016747,acyltransferase activity, transferring gr…	PF02458.18:Transferase family	18.7959	17.9252	18.676	8.6945	8.7613	7.2662	3.2633	3.0859	2.7046	1.33518	7.18e-26	1.44e-24	2.80873	2.66e-60	3.77e-59	-1.46924	2.09e-12	9.8e-12
Pcab100142	scaffold_685	117896	118532	+	K13065 shikimate O-hydroxycinnamoyltransferase [EC:2.3.1.133] | (RefSeq) spermidine hydroxycinnamoyl transferase (A)	down	up	FALSE	ko00940: Phenylpropanoid biosynthesis; ko00941: Flavonoid biosynthesis; ko00945: Stilbenoid, diarylheptanoid and gingerol biosynthesis; ko01100: Metabolic pathways; ko01110: Biosynthesis of secondary metabolites	hypothetical protein Pfo_000711 [Paulownia fortunei]	--	A0A6I9TRL8_SESIN SubName: Full=spermidine hydroxycinnamoyl transferase {ECO:0000313|RefSeq:XP_011083883.1};	--	GO:0016740,transferase activity; GO:0003674,molecular_function; GO:0003824,catalytic activity	--	3.4402	2.8787	4.2775	4.3078	2.2203	3.4226	0	0	0	0.259161	0.526727	0.654933	7.06146	4.05e-08	1.19e-07	-6.79588	1.61e-07	5.25e-07
Pcab100900	scaffold_1159	161776	163032	+	K13065 shikimate O-hydroxycinnamoyltransferase [EC:2.3.1.133] | (RefSeq) vinorine synthase-like isoform X3 (A)	down	up	up	ko00940: Phenylpropanoid biosynthesis; ko00941: Flavonoid biosynthesis; ko00945: Stilbenoid, diarylheptanoid and gingerol biosynthesis; ko01100: Metabolic pathways; ko01110: Biosynthesis of secondary metabolites	hypothetical protein Pfo_009291 [Paulownia fortunei]	SAT_CATRO RecName: Full=Stemmadenine O-acetyltransferase {ECO:0000303|PubMed:29511102}; Short=CrSAT {ECO:0000303|PubMed:29511102}; EC=1.7.1.- {ECO:0000269|PubMed:29511102};	A0A6I9SMU1_SESIN SubName: Full=vinorine synthase-like {ECO:0000313|RefSeq:XP_011071304.1};	--	GO:0016746,acyltransferase activity; GO:0016491,oxidoreductase activity; GO:0009820,alkaloid metabolic process; GO:0003674,molecular_function; GO:0003824,catalytic activity; GO:0016740,transferase activity; GO:0006807,nitrogen compound metabolic process; GO:0008150,biological_process; GO:0008152,metabolic process; GO:0071704,organic substance metabolic process; GO:1901564,organonitrogen compound …	PF02458.18:Transferase family	35.2477	34.6705	36.0992	13.8797	14.3793	16.0383	2.1683	1.9238	1.1304	1.4316	1.18e-47	4.6e-46	4.54384	6.23e-122	1.85e-120	-3.10779	2.97e-43	3.74e-42
Pcab104257	scaffold_577_1_351313	294135	295541	-	K13065 shikimate O-hydroxycinnamoyltransferase [EC:2.3.1.133] | (RefSeq) vinorine synthase-like (A)	down	up	up	ko00940: Phenylpropanoid biosynthesis; ko00941: Flavonoid biosynthesis; ko00945: Stilbenoid, diarylheptanoid and gingerol biosynthesis; ko01100: Metabolic pathways; ko01110: Biosynthesis of secondary metabolites	hypothetical protein Pfo_021367 [Paulownia fortunei]	SALAT_PAPSO RecName: Full=Salutaridinol 7-O-acetyltransferase {ECO:0000303|PubMed:11404355}; Short=salAT {ECO:0000303|PubMed:11404355}; EC=2.3.1.150 {ECO:0000269|PubMed:11404355, ECO:0000269|PubMed:8537369};	A0A830BH86_9LAMI SubName: Full=Salutaridinol 7-o-acetyltransferase {ECO:0000313|EMBL:GFP86940.1};	--	GO:0047180,salutaridinol 7-O-acetyltransferase activity; GO:0009820,alkaloid metabolic process; GO:0003674,molecular_function; GO:0003824,catalytic activity; GO:0008374,O-acyltransferase activity; GO:0016407,acetyltransferase activity; GO:0016413,O-acetyltransferase activity; GO:0016740,transferase activity; GO:0016746,acyltransferase activity; GO:0016747,acyltransferase activity, transferring gr…	PF02458.18:Transferase family	47.4329	40.2219	45.9049	19.2988	19.8926	17.7806	6.3112	6.7185	5.891	1.40092	5.74e-52	2.46e-50	3.01152	7.83e-127	2.42e-125	-1.60681	5.5e-29	4.9e-28
Pcab105736	scaffold_2198	127687	129620	-	K13065 shikimate O-hydroxycinnamoyltransferase [EC:2.3.1.133] | (RefSeq) vinorine synthase-like (A)	FALSE	up	up	ko00940: Phenylpropanoid biosynthesis; ko00941: Flavonoid biosynthesis; ko00945: Stilbenoid, diarylheptanoid and gingerol biosynthesis; ko01100: Metabolic pathways; ko01110: Biosynthesis of secondary metabolites	hypothetical protein Pfo_005438 [Paulownia fortunei]	SAT_CATRO RecName: Full=Stemmadenine O-acetyltransferase {ECO:0000303|PubMed:29511102}; Short=CrSAT {ECO:0000303|PubMed:29511102}; EC=1.7.1.- {ECO:0000269|PubMed:29511102};	A0A6I9U508_SESIN SubName: Full=vinorine synthase-like {ECO:0000313|RefSeq:XP_011091914.1};	--	GO:0016746,acyltransferase activity; GO:0016491,oxidoreductase activity; GO:0009820,alkaloid metabolic process; GO:0003674,molecular_function; GO:0003824,catalytic activity; GO:0016740,transferase activity; GO:0006807,nitrogen compound metabolic process; GO:0008150,biological_process; GO:0008152,metabolic process; GO:0071704,organic substance metabolic process; GO:1901564,organonitrogen compound …	PF02458.18:Transferase family	2.0273	3.4545	2.5286	1.063	1.6058	0.7628	0.8528	0.9693	0.905	1.39428	0.000267922	0.00104944	1.74352	2.71e-05	6.07e-05	-0.347462	0.494431	0.570153
Pcab106092	scaffold_252_1_560022	358245	368357	-	K13065 shikimate O-hydroxycinnamoyltransferase [EC:2.3.1.133] | (RefSeq) shikimate O-hydroxycinnamoyltransferase (A)	down	up	FALSE	ko00940: Phenylpropanoid biosynthesis; ko00941: Flavonoid biosynthesis; ko00945: Stilbenoid, diarylheptanoid and gingerol biosynthesis; ko01100: Metabolic pathways; ko01110: Biosynthesis of secondary metabolites	hydroxycinnamoyl-CoA shikimate/quinate hydroxycinnamoyl transferase [Perilla frutescens var. frutescens]	HST_TOBAC RecName: Full=Shikimate O-hydroxycinnamoyltransferase; EC=2.3.1.133; AltName: Full=Hydroxycinnamoyl transferase; AltName: Full=Hydroxycinnamoyl-Coenzyme A shikimate/quinate hydroxycinnamoyltransferase;	A0A6I9THQ9_SESIN SubName: Full=shikimate O-hydroxycinnamoyltransferase {ECO:0000313|RefSeq:XP_011082506.1};	--	GO:0016747,acyltransferase activity, transferring groups other than amino-acyl groups; GO:0047172,shikimate O-hydroxycinnamoyltransferase activity; GO:0003674,molecular_function; GO:0003824,catalytic activity; GO:0016740,transferase activity; GO:0016746,acyltransferase activity; GO:0008374,O-acyltransferase activity; GO:0050734,hydroxycinnamoyltransferase activity; GO:0050737,O-hydroxycinnamoyltr…	PF02458.18:Transferase family	14.0236	11.0603	12.7946	23.6294	27.3729	23.5341	2.8662	3.225	3.3455	-0.804396	9.53e-11	8.49e-10	2.19524	3.41e-27	2.47e-26	-2.99499	2.53e-66	4.7e-65
Pcab107509	scaffold_1445	163149	164645	+	K13065 shikimate O-hydroxycinnamoyltransferase [EC:2.3.1.133] | (RefSeq) shikimate O-hydroxycinnamoyltransferase (A)	up	FALSE	FALSE	ko00940: Phenylpropanoid biosynthesis; ko00941: Flavonoid biosynthesis; ko00945: Stilbenoid, diarylheptanoid and gingerol biosynthesis; ko01100: Metabolic pathways; ko01110: Biosynthesis of secondary metabolites	HXXXD-type acyl-transferase family protein [Perilla frutescens var. frutescens]	CFAT_PETHY RecName: Full=Coniferyl alcohol acyltransferase {ECO:0000303|PubMed:17241449}; Short=PhCFAT {ECO:0000303|PubMed:17241449}; EC=2.3.1.- {ECO:0000269|PubMed:17241449}; AltName: Full=(E)-cinnamyl alcohol acyltransferase {ECO:0000303|PubMed:17241449}; EC=2.3.1.224 {ECO:0000269|PubMed:17241449}; AltName: Full=(E)-sinapoyl alcohol acyltransferase {ECO:0000303|PubMed:17241449}; EC=2.3.1.- {ECO…	A0A6I9SLA0_SESIN SubName: Full=shikimate O-hydroxycinnamoyltransferase {ECO:0000313|RefSeq:XP_011070203.1};	--	GO:0102387,2-phenylethanol acetyltransferase activity; GO:0102720,acetyl-coenzyme A:acetyl alcohol acetyltransferase activity; GO:0034318,alcohol O-acyltransferase activity; GO:0007623,circadian rhythm; GO:0010597,green leaf volatile biosynthetic process; GO:0009699,phenylpropanoid biosynthetic process; GO:0009723,response to ethylene; GO:0003674,molecular_function; GO:0003824,catalytic activity;…	PF02458.18:Transferase family	1.1634	0.8411	1.1493	1.4833	0.9461	0.8889	2.8778	1.8111	2.4784	0.0953819	0.816933	0.882355	-0.986134	0.00689971	0.0114098	1.08503	0.00240704	0.00476944
Pcab114231	scaffold_252_564642_1053776	332163	341517	+	K13065 shikimate O-hydroxycinnamoyltransferase [EC:2.3.1.133] | (RefSeq) shikimate O-hydroxycinnamoyltransferase isoform X2 (A)	NA	up	FALSE	ko00940: Phenylpropanoid biosynthesis; ko00941: Flavonoid biosynthesis; ko00945: Stilbenoid, diarylheptanoid and gingerol biosynthesis; ko01100: Metabolic pathways; ko01110: Biosynthesis of secondary metabolites	hypothetical protein Pfo_020138 [Paulownia fortunei]	HST_TOBAC RecName: Full=Shikimate O-hydroxycinnamoyltransferase; EC=2.3.1.133; AltName: Full=Hydroxycinnamoyl transferase; AltName: Full=Hydroxycinnamoyl-Coenzyme A shikimate/quinate hydroxycinnamoyltransferase;	A0A5B8EH31_9ASTE SubName: Full=Shikimate O-hydroxycinnamoyl transferase {ECO:0000313|EMBL:QDF44405.1};	--	GO:0016747,acyltransferase activity, transferring groups other than amino-acyl groups; GO:0047172,shikimate O-hydroxycinnamoyltransferase activity; GO:0003674,molecular_function; GO:0003824,catalytic activity; GO:0016740,transferase activity; GO:0016746,acyltransferase activity; GO:0008374,O-acyltransferase activity; GO:0050734,hydroxycinnamoyltransferase activity; GO:0050737,O-hydroxycinnamoyltr…	PF02458.18:Transferase family	1.0359	0.8842	1.1725	0.3302	0.702	0.5442	0	0	0	1.14749	0.0248308	0.0580112	6.75384	2.46e-07	6.76e-07	NA	NA	NA
Pcab114233	scaffold_252_564642_1053776	391267	393461	-	K13065 shikimate O-hydroxycinnamoyltransferase [EC:2.3.1.133] | (RefSeq) shikimate O-hydroxycinnamoyltransferase isoform X1 (A)	down	up	up	ko00940: Phenylpropanoid biosynthesis; ko00941: Flavonoid biosynthesis; ko00945: Stilbenoid, diarylheptanoid and gingerol biosynthesis; ko01100: Metabolic pathways; ko01110: Biosynthesis of secondary metabolites	hypothetical protein Pfo_020138 [Paulownia fortunei]	RAS_PLESU RecName: Full=Rosmarinate synthase; Short=CbRAS; EC=2.3.1.140; AltName: Full=Hydroxycinnamoyl transferase; Short=CbHCT1;	M4T4A3_PERFR SubName: Full=Rosmarinic acid synthase {ECO:0000313|EMBL:AGH61997.1};	--	GO:0050266,rosmarinate synthase activity; GO:0003674,molecular_function; GO:0003824,catalytic activity; GO:0016740,transferase activity; GO:0016746,acyltransferase activity; GO:0016747,acyltransferase activity, transferring groups other than amino-acyl groups	PF02458.18:Transferase family	6.8964	7.466	7.54	3.6309	4.7466	3.4477	0.136	0.1133	0.1221	1.06125	9.54e-08	6.28e-07	6.08186	3.45e-22	2.13e-21	-5.01746	2.99e-14	1.55e-13
Pcab115392	scaffold_1022	179747	193709	-	K13065 shikimate O-hydroxycinnamoyltransferase [EC:2.3.1.133] | (RefSeq) agmatine hydroxycinnamoyltransferase 1-like (A)	down	FALSE	down	ko00940: Phenylpropanoid biosynthesis; ko00941: Flavonoid biosynthesis; ko00945: Stilbenoid, diarylheptanoid and gingerol biosynthesis; ko01100: Metabolic pathways; ko01110: Biosynthesis of secondary metabolites	hypothetical protein Pfo_023278 [Paulownia fortunei]	CFAT_PETHY RecName: Full=Coniferyl alcohol acyltransferase {ECO:0000303|PubMed:17241449}; Short=PhCFAT {ECO:0000303|PubMed:17241449}; EC=2.3.1.- {ECO:0000269|PubMed:17241449}; AltName: Full=(E)-cinnamyl alcohol acyltransferase {ECO:0000303|PubMed:17241449}; EC=2.3.1.224 {ECO:0000269|PubMed:17241449}; AltName: Full=(E)-sinapoyl alcohol acyltransferase {ECO:0000303|PubMed:17241449}; EC=2.3.1.- {ECO…	A0A2G9HBB1_9LAMI SubName: Full=Alcohol O-acetyltransferase {ECO:0000313|EMBL:PIN14815.1}; EC=2.3.1.84 {ECO:0000313|EMBL:PIN14815.1};	--	GO:0102387,2-phenylethanol acetyltransferase activity; GO:0102720,acetyl-coenzyme A:acetyl alcohol acetyltransferase activity; GO:0034318,alcohol O-acyltransferase activity; GO:0007623,circadian rhythm; GO:0010597,green leaf volatile biosynthetic process; GO:0009699,phenylpropanoid biosynthetic process; GO:0009723,response to ethylene; GO:0003674,molecular_function; GO:0003824,catalytic activity;…	PF02458.18:Transferase family	0.3969	0.5481	0.8169	2.2142	3.5067	1.8956	0.5636	0.3653	0.8434	-1.94519	3.27e-06	1.77e-05	0.182165	0.769649	0.808128	-2.12645	1.24e-06	3.72e-06
Pcab116997	scaffold_2125	169094	172421	-	K13065 shikimate O-hydroxycinnamoyltransferase [EC:2.3.1.133] | (RefSeq) shikimate O-hydroxycinnamoyltransferase (A)	down	up	up	ko00940: Phenylpropanoid biosynthesis; ko00941: Flavonoid biosynthesis; ko00945: Stilbenoid, diarylheptanoid and gingerol biosynthesis; ko01100: Metabolic pathways; ko01110: Biosynthesis of secondary metabolites	hydroxycinnamoyl-CoA shikimate/quinate hydroxycinnamoyl transferase [Perilla frutescens var. frutescens]	HST_TOBAC RecName: Full=Shikimate O-hydroxycinnamoyltransferase; EC=2.3.1.133; AltName: Full=Hydroxycinnamoyl transferase; AltName: Full=Hydroxycinnamoyl-Coenzyme A shikimate/quinate hydroxycinnamoyltransferase;	A0A5B8EH31_9ASTE SubName: Full=Shikimate O-hydroxycinnamoyl transferase {ECO:0000313|EMBL:QDF44405.1};	--	GO:0016747,acyltransferase activity, transferring groups other than amino-acyl groups; GO:0047172,shikimate O-hydroxycinnamoyltransferase activity; GO:0003674,molecular_function; GO:0003824,catalytic activity; GO:0016740,transferase activity; GO:0016746,acyltransferase activity; GO:0008374,O-acyltransferase activity; GO:0050734,hydroxycinnamoyltransferase activity; GO:0050737,O-hydroxycinnamoyltr…	PF02458.18:Transferase family	5.4385	5.9811	5.0633	1.4622	2.0559	2.0282	0	0.0545	0	1.74647	1.27e-12	1.3e-11	8.20694	9.39e-12	3.61e-11	-6.45842	2.5e-07	8e-07
Pcab117007	scaffold_2125	361602	369506	+	K13065 shikimate O-hydroxycinnamoyltransferase [EC:2.3.1.133] | (RefSeq) shikimate O-hydroxycinnamoyltransferase (A)	down	up	FALSE	ko00940: Phenylpropanoid biosynthesis; ko00941: Flavonoid biosynthesis; ko00945: Stilbenoid, diarylheptanoid and gingerol biosynthesis; ko01100: Metabolic pathways; ko01110: Biosynthesis of secondary metabolites	hydroxycinnamoyl-CoA shikimate/quinate hydroxycinnamoyl transferase [Perilla frutescens var. frutescens]	HST_TOBAC RecName: Full=Shikimate O-hydroxycinnamoyltransferase; EC=2.3.1.133; AltName: Full=Hydroxycinnamoyl transferase; AltName: Full=Hydroxycinnamoyl-Coenzyme A shikimate/quinate hydroxycinnamoyltransferase;	A0A6I9THQ9_SESIN SubName: Full=shikimate O-hydroxycinnamoyltransferase {ECO:0000313|RefSeq:XP_011082506.1};	--	GO:0016747,acyltransferase activity, transferring groups other than amino-acyl groups; GO:0047172,shikimate O-hydroxycinnamoyltransferase activity; GO:0003674,molecular_function; GO:0003824,catalytic activity; GO:0016740,transferase activity; GO:0016746,acyltransferase activity; GO:0008374,O-acyltransferase activity; GO:0050734,hydroxycinnamoyltransferase activity; GO:0050737,O-hydroxycinnamoyltr…	PF02458.18:Transferase family	41.2546	37.588	39.2484	56.6248	59.9663	54.0035	9.9457	9.8644	9.1531	-0.358792	2.37e-07	1.49e-06	2.22151	1.07e-103	2.66e-102	-2.57627	5.28e-154	2.49e-152
Pcab119716	scaffold_161_1_178259	21356	22631	+	K13065 shikimate O-hydroxycinnamoyltransferase [EC:2.3.1.133] | (RefSeq) vinorine synthase-like (A)	down	up	up	ko00940: Phenylpropanoid biosynthesis; ko00941: Flavonoid biosynthesis; ko00945: Stilbenoid, diarylheptanoid and gingerol biosynthesis; ko01100: Metabolic pathways; ko01110: Biosynthesis of secondary metabolites	hypothetical protein Pfo_022630 [Paulownia fortunei]	SAT_CATRO RecName: Full=Stemmadenine O-acetyltransferase {ECO:0000303|PubMed:29511102}; Short=CrSAT {ECO:0000303|PubMed:29511102}; EC=1.7.1.- {ECO:0000269|PubMed:29511102};	A0A6I9UI53_SESIN SubName: Full=vinorine synthase-like {ECO:0000313|RefSeq:XP_011098395.1};	--	GO:0016746,acyltransferase activity; GO:0016491,oxidoreductase activity; GO:0009820,alkaloid metabolic process; GO:0003674,molecular_function; GO:0003824,catalytic activity; GO:0016740,transferase activity; GO:0006807,nitrogen compound metabolic process; GO:0008150,biological_process; GO:0008152,metabolic process; GO:0071704,organic substance metabolic process; GO:1901564,organonitrogen compound …	PF02458.18:Transferase family	3.5985	4.3474	3.5293	1.3313	2.2318	2.3091	0	0.2366	0	1.14213	7.32e-05	0.000319771	5.68315	6.02e-13	2.49e-12	-4.54783	1.05e-07	3.47e-07
Pcab125171	scaffold_2769	53778	58248	-	K13065 shikimate O-hydroxycinnamoyltransferase [EC:2.3.1.133] | (RefSeq) fatty alcohol:caffeoyl-CoA acyltransferase-like (A)	down	NA	down	ko00940: Phenylpropanoid biosynthesis; ko00941: Flavonoid biosynthesis; ko00945: Stilbenoid, diarylheptanoid and gingerol biosynthesis; ko01100: Metabolic pathways; ko01110: Biosynthesis of secondary metabolites	PREDICTED: lipid phosphate phosphatase delta [Erythranthe guttata]	LPPD_ARATH RecName: Full=Lipid phosphate phosphatase delta; Short=AtLPPD; EC=3.1.3.-; AltName: Full=Phosphatidic acid phosphatase delta; AltName: Full=Sphingoid phosphate phosphatase 1; Short=AtSSP1; AltName: Full=Sphingosine-1-phosphate phosphatase; Short=AtSPPASE;	A0A022RHW8_ERYGU RecName: Full=acidPPc domain-containing protein {ECO:0000259|SMART:SM00014};	Sphingoid base-phosphate phosphatase	GO:0005789,endoplasmic reticulum membrane; GO:0016021,integral component of membrane; GO:0016020,membrane; GO:0008117,sphinganine-1-phosphate aldolase activity; GO:0042392,sphingosine-1-phosphate phosphatase activity; GO:0046839,phospholipid dephosphorylation; GO:0009737,response to abscisic acid; GO:0006665,sphingolipid metabolic process; GO:0090332,stomatal closure; GO:0003674,molecular_functio…	--	0.0471	0.1419	0.1939	1.0295	0.7296	0.5398	0.1783	0.4459	0	-2.4232	0.00154653	0.00513787	NA	NA	NA	-1.87997	0.0129789	0.0227238
Pcab129558	scaffold_2676	36984	38288	-	K13065 shikimate O-hydroxycinnamoyltransferase [EC:2.3.1.133] | (RefSeq) stemmadenine O-acetyltransferase-like (A)	NA	up	up	ko00940: Phenylpropanoid biosynthesis; ko00941: Flavonoid biosynthesis; ko00945: Stilbenoid, diarylheptanoid and gingerol biosynthesis; ko01100: Metabolic pathways; ko01110: Biosynthesis of secondary metabolites	hypothetical protein Pfo_022630 [Paulownia fortunei]	SAT_CATRO RecName: Full=Stemmadenine O-acetyltransferase {ECO:0000303|PubMed:29511102}; Short=CrSAT {ECO:0000303|PubMed:29511102}; EC=1.7.1.- {ECO:0000269|PubMed:29511102};	A0A4D8ZSP3_SALSN SubName: Full=Uncharacterized protein {ECO:0000313|EMBL:TEY34301.1};	--	GO:0016746,acyltransferase activity; GO:0016491,oxidoreductase activity; GO:0009820,alkaloid metabolic process; GO:0003674,molecular_function; GO:0003824,catalytic activity; GO:0016740,transferase activity; GO:0006807,nitrogen compound metabolic process; GO:0008150,biological_process; GO:0008152,metabolic process; GO:0071704,organic substance metabolic process; GO:1901564,organonitrogen compound …	PF02458.18:Transferase family	2.7225	2.6266	2.3071	0	0.2584	0.102	0	0	0	4.6073	7.85e-13	8.16e-12	8.01942	8.16e-11	2.95e-10	NA	NA	NA
Pcab136381	scaffold_2506	26339	35109	+	K13065 shikimate O-hydroxycinnamoyltransferase [EC:2.3.1.133] | (RefSeq) shikimate O-hydroxycinnamoyltransferase-like (A)	NA	up	FALSE	ko00940: Phenylpropanoid biosynthesis; ko00941: Flavonoid biosynthesis; ko00945: Stilbenoid, diarylheptanoid and gingerol biosynthesis; ko01100: Metabolic pathways; ko01110: Biosynthesis of secondary metabolites	hypothetical protein Pfo_000153 [Paulownia fortunei]	CFAT_PETHY RecName: Full=Coniferyl alcohol acyltransferase {ECO:0000303|PubMed:17241449}; Short=PhCFAT {ECO:0000303|PubMed:17241449}; EC=2.3.1.- {ECO:0000269|PubMed:17241449}; AltName: Full=(E)-cinnamyl alcohol acyltransferase {ECO:0000303|PubMed:17241449}; EC=2.3.1.224 {ECO:0000269|PubMed:17241449}; AltName: Full=(E)-sinapoyl alcohol acyltransferase {ECO:0000303|PubMed:17241449}; EC=2.3.1.- {ECO…	A0A6M8YBM7_OCIBA SubName: Full=BAHD acyltransferase {ECO:0000313|EMBL:QKK36037.1};	--	GO:0102387,2-phenylethanol acetyltransferase activity; GO:0102720,acetyl-coenzyme A:acetyl alcohol acetyltransferase activity; GO:0034318,alcohol O-acyltransferase activity; GO:0007623,circadian rhythm; GO:0010597,green leaf volatile biosynthetic process; GO:0009699,phenylpropanoid biosynthetic process; GO:0009723,response to ethylene; GO:0003674,molecular_function; GO:0003824,catalytic activity;…	PF02458.18:Transferase family	1.5535	1.3137	0.8414	0.8936	1.4249	1.0933	0.2064	0	0.1853	0.296901	0.563866	0.68626	3.48812	0.000270459	0.000538769	NA	NA	NA
Pcab004364	scaffold_158	1164582	1167958	+	K13065 shikimate O-hydroxycinnamoyltransferase [EC:2.3.1.133] | (RefSeq) shikimate O-hydroxycinnamoyltransferase-like (A)	FALSE	down	down	ko00940: Phenylpropanoid biosynthesis; ko00941: Flavonoid biosynthesis; ko00945: Stilbenoid, diarylheptanoid and gingerol biosynthesis; ko01100: Metabolic pathways; ko01110: Biosynthesis of secondary metabolites	hypothetical protein Pfo_016364 [Paulownia fortunei]	CER26_ARATH RecName: Full=Protein ECERIFERUM 26; AltName: Full=CER2-like protein 1; Short=CER2-like1;	A0A2G9GTA8_9LAMI SubName: Full=Uncharacterized protein {ECO:0000313|EMBL:PIN08462.1};	--	GO:0005829,cytosol; GO:0016747,acyltransferase activity, transferring groups other than amino-acyl groups; GO:0071555,cell wall organization; GO:0042761,very long-chain fatty acid biosynthetic process; GO:0010025,wax biosynthetic process; GO:0003674,molecular_function; GO:0003824,catalytic activity; GO:0016740,transferase activity; GO:0016746,acyltransferase activity; GO:0008150,biological_proces…	PF02458.18:Transferase family	2.2933	1.738	2.1817	8.0387	7.9591	6.9841	11.8501	9.2849	14.121	-1.71587	9.54e-17	1.26e-15	-2.31143	2.02e-26	1.42e-25	0.599226	0.000315382	0.000710766
Pcab013007	scaffold_15	1432268	1433617	-	K13065 shikimate O-hydroxycinnamoyltransferase [EC:2.3.1.133] | (RefSeq) vinorine synthase-like (A)	up	down	down	ko00940: Phenylpropanoid biosynthesis; ko00941: Flavonoid biosynthesis; ko00945: Stilbenoid, diarylheptanoid and gingerol biosynthesis; ko01100: Metabolic pathways; ko01110: Biosynthesis of secondary metabolites	hypothetical protein Pfo_021362 [Paulownia fortunei]	SAT_CATRO RecName: Full=Stemmadenine O-acetyltransferase {ECO:0000303|PubMed:29511102}; Short=CrSAT {ECO:0000303|PubMed:29511102}; EC=1.7.1.- {ECO:0000269|PubMed:29511102};	A0A6I9UQX6_SESIN SubName: Full=vinorine synthase {ECO:0000313|RefSeq:XP_011101142.1};	--	GO:0016746,acyltransferase activity; GO:0016491,oxidoreductase activity; GO:0009820,alkaloid metabolic process; GO:0003674,molecular_function; GO:0003824,catalytic activity; GO:0016740,transferase activity; GO:0006807,nitrogen compound metabolic process; GO:0008150,biological_process; GO:0008152,metabolic process; GO:0071704,organic substance metabolic process; GO:1901564,organonitrogen compound …	PF02458.18:Transferase family	0.1032	0	0.2124	1.3158	1.4488	1.035	2.5399	3.691	3.2746	-3.42877	7.32e-06	3.76e-05	-4.73391	5.48e-12	2.13e-11	1.31019	6.68e-05	0.000164291
Pcab016521	scaffold_64	1592273	1593577	-	K13065 shikimate O-hydroxycinnamoyltransferase [EC:2.3.1.133] | (RefSeq) agmatine coumaroyltransferase-2 (A)	FALSE	down	NA	ko00940: Phenylpropanoid biosynthesis; ko00941: Flavonoid biosynthesis; ko00945: Stilbenoid, diarylheptanoid and gingerol biosynthesis; ko01100: Metabolic pathways; ko01110: Biosynthesis of secondary metabolites	hypothetical protein Pfo_018010 [Paulownia fortunei]	AHT1_ORYSJ RecName: Full=Agmatine hydroxycinnamoyltransferase 1 {ECO:0000303|PubMed:27354554}; Short=OsAHT1 {ECO:0000303|PubMed:27354554}; EC=2.3.1.- {ECO:0000305}; AltName: Full=Agmatine hydroxycinnamoyl transferase {ECO:0000303|PubMed:24908251};	A0A6I9U7W8_SESIN SubName: Full=agmatine coumaroyltransferase-2 {ECO:0000313|RefSeq:XP_011089981.1};	--	GO:0016747,acyltransferase activity, transferring groups other than amino-acyl groups; GO:0050734,hydroxycinnamoyltransferase activity; GO:0003674,molecular_function; GO:0003824,catalytic activity; GO:0016740,transferase activity; GO:0016746,acyltransferase activity	PF02458.18:Transferase family	0.1601	0.0536	0.1648	0.2917	0.5685	0.5608	1.2127	1.0669	0.9678	NA	NA	NA	-2.90701	0.000182959	0.000372305	1.17688	0.0311454	0.0504882
Pcab023695	scaffold_167	449254	452718	-	K13065 shikimate O-hydroxycinnamoyltransferase [EC:2.3.1.133] | (RefSeq) shikimate O-hydroxycinnamoyltransferase-like (A)	up	down	FALSE	ko00940: Phenylpropanoid biosynthesis; ko00941: Flavonoid biosynthesis; ko00945: Stilbenoid, diarylheptanoid and gingerol biosynthesis; ko01100: Metabolic pathways; ko01110: Biosynthesis of secondary metabolites	hypothetical protein Pfo_016364 [Paulownia fortunei]	CER26_ARATH RecName: Full=Protein ECERIFERUM 26; AltName: Full=CER2-like protein 1; Short=CER2-like1;	A0A2G9GTA8_9LAMI SubName: Full=Uncharacterized protein {ECO:0000313|EMBL:PIN08462.1};	--	GO:0005829,cytosol; GO:0016747,acyltransferase activity, transferring groups other than amino-acyl groups; GO:0071555,cell wall organization; GO:0042761,very long-chain fatty acid biosynthetic process; GO:0010025,wax biosynthetic process; GO:0003674,molecular_function; GO:0003824,catalytic activity; GO:0016740,transferase activity; GO:0016746,acyltransferase activity; GO:0008150,biological_proces…	PF02458.18:Transferase family	0.6515	0.3271	0.3352	0.8052	1.1263	0.7111	6.6366	7.0488	6.3806	-0.833191	0.12485	0.220251	-3.73632	3e-26	2.1e-25	2.9097	8.38e-26	6.8e-25
Pcab026990	scaffold_226	317056	319691	+	K13065 shikimate O-hydroxycinnamoyltransferase [EC:2.3.1.133] | (RefSeq) BAHDb5c; BAHD family acyltransferase (A)	up	down	NA	ko00940: Phenylpropanoid biosynthesis; ko00941: Flavonoid biosynthesis; ko00945: Stilbenoid, diarylheptanoid and gingerol biosynthesis; ko01100: Metabolic pathways; ko01110: Biosynthesis of secondary metabolites	hypothetical protein BUALT_Bualt19G0057500 [Buddleja alternifolia]	CER2_ARATH RecName: Full=Protein ECERIFERUM 2;	A0A2G9GAE6_9LAMI SubName: Full=Quinate O-hydroxycinnamoyltransferase {ECO:0000313|EMBL:PIN02202.1}; EC=2.3.1.99 {ECO:0000313|EMBL:PIN02202.1};	--	GO:0005783,endoplasmic reticulum; GO:0005634,nucleus; GO:0016747,acyltransferase activity, transferring groups other than amino-acyl groups; GO:0071555,cell wall organization; GO:0009555,pollen development; GO:0042761,very long-chain fatty acid biosynthetic process; GO:0010025,wax biosynthetic process; GO:0003674,molecular_function; GO:0003824,catalytic activity; GO:0016740,transferase activity; …	PF02458.18:Transferase family	0.1601	0.1072	0.6042	0.6806	0.3618	0.6118	2.4927	2.2461	3.9319	NA	NA	NA	-3.13471	6.76e-09	2.12e-08	2.37236	2.59e-08	9.03e-08
Pcab028814	scaffold_194	349465	352148	-	K13065 shikimate O-hydroxycinnamoyltransferase [EC:2.3.1.133] | (RefSeq) acyltransferase Pun1-like (A)	FALSE	down	down	ko00940: Phenylpropanoid biosynthesis; ko00941: Flavonoid biosynthesis; ko00945: Stilbenoid, diarylheptanoid and gingerol biosynthesis; ko01100: Metabolic pathways; ko01110: Biosynthesis of secondary metabolites	hypothetical protein C2S51_018792 [Perilla frutescens var. frutescens]	CIA2_ARATH RecName: Full=Protein CHLOROPLAST IMPORT APPARATUS 2; Flags: Precursor;	A0A4D9A1W6_SALSN RecName: Full=CCT domain-containing protein {ECO:0000259|PROSITE:PS51017};	GATA-4/5/6 transcription factors	GO:0009507,chloroplast; GO:0005634,nucleus; GO:0045036,protein targeting to chloroplast; GO:0006355,regulation of DNA-templated transcription; GO:0006605,protein targeting; GO:0006810,transport; GO:0006886,intracellular protein transport; GO:0008104,protein localization; GO:0008150,biological_process; GO:0009987,cellular process; GO:0015031,protein transport; GO:0033036,macromolecule localization…	PF06203.17:CCT motif	1.2913	0.9725	0.5315	16.7573	14.8762	12.7028	11.0002	11.3415	12.0715	-3.81127	1.04e-41	3.46e-40	-3.42447	4.93e-30	3.85e-29	-0.382807	0.0153734	0.0265236
Pcab032462	scaffold_67	1424322	1425846	-	K13065 shikimate O-hydroxycinnamoyltransferase [EC:2.3.1.133] | (RefSeq) spermidine hydroxycinnamoyl transferase (A)	up	down	NA	ko00940: Phenylpropanoid biosynthesis; ko00941: Flavonoid biosynthesis; ko00945: Stilbenoid, diarylheptanoid and gingerol biosynthesis; ko01100: Metabolic pathways; ko01110: Biosynthesis of secondary metabolites	spermidine hydroxycinnamoyl transferase [Sesamum indicum]	SHT_ARATH RecName: Full=Spermidine hydroxycinnamoyl transferase {ECO:0000303|PubMed:19077165}; Short=AtSHT {ECO:0000303|PubMed:33519864}; EC=2.3.1.- {ECO:0000269|PubMed:19077165}; AltName: Full=BAHD-like hydroxycinnamoyl transferase {ECO:0000303|PubMed:19077165};	A0A6I9T2E2_SESIN SubName: Full=spermidine hydroxycinnamoyl transferase {ECO:0000313|RefSeq:XP_011077685.1};	--	GO:0016747,acyltransferase activity, transferring groups other than amino-acyl groups; GO:0016410,N-acyltransferase activity; GO:0080074,spermidine:caffeoyl CoA N-acyltransferase activity; GO:0080073,spermidine:coumaroyl CoA N-acyltransferase activity; GO:0080075,spermidine:feruloyl CoA N-acyltransferase activity; GO:0080072,spermidine:sinapoyl CoA N-acyltransferase activity; GO:0009555,pollen de…	PF02458.18:Transferase family	0.0494	0.1984	0.1017	0.8099	0.4305	0.4719	1.8706	1.8709	1.7915	NA	NA	NA	-3.79171	4.06e-08	1.19e-07	1.66961	0.000139215	0.000328412
Pcab040034	scaffold_143	926135	929394	+	K13065 shikimate O-hydroxycinnamoyltransferase [EC:2.3.1.133] | (RefSeq) rosmarinate synthase-like (A)	up	down	NA	ko00940: Phenylpropanoid biosynthesis; ko00941: Flavonoid biosynthesis; ko00945: Stilbenoid, diarylheptanoid and gingerol biosynthesis; ko01100: Metabolic pathways; ko01110: Biosynthesis of secondary metabolites	rosmarinate synthase-like [Salvia splendens]	RAS_PLESU RecName: Full=Rosmarinate synthase; Short=CbRAS; EC=2.3.1.140; AltName: Full=Hydroxycinnamoyl transferase; Short=CbHCT1;	A0A4D8ZU22_SALSN SubName: Full=Uncharacterized protein {ECO:0000313|EMBL:TEY45537.1};	--	GO:0050266,rosmarinate synthase activity; GO:0003674,molecular_function; GO:0003824,catalytic activity; GO:0016740,transferase activity; GO:0016746,acyltransferase activity; GO:0016747,acyltransferase activity, transferring groups other than amino-acyl groups	PF02458.18:Transferase family	0	0	0	0.1101	0.1756	0.0578	8.1662	10.6228	7.4692	NA	NA	NA	-9.4123	5.02e-15	2.32e-14	6.2443	4.85e-23	3.6e-22
Pcab048702	scaffold_331	781362	782666	-	K13065 shikimate O-hydroxycinnamoyltransferase [EC:2.3.1.133] | (RefSeq) fatty alcohol:caffeoyl-CoA acyltransferase-like (A)	up	down	down	ko00940: Phenylpropanoid biosynthesis; ko00941: Flavonoid biosynthesis; ko00945: Stilbenoid, diarylheptanoid and gingerol biosynthesis; ko01100: Metabolic pathways; ko01110: Biosynthesis of secondary metabolites	hypothetical protein Pfo_030795 [Paulownia fortunei]	GLC_ARATH RecName: Full=Acyltransferase GLAUCE {ECO:0000303|PubMed:17965055, ECO:0000303|PubMed:22872756}; EC=2.3.1.- {ECO:0000305};	A0A4D9B4C2_SALSN SubName: Full=Uncharacterized protein {ECO:0000313|EMBL:TEY73872.1};	--	GO:0005737,cytoplasm; GO:0005634,nucleus; GO:0016747,acyltransferase activity, transferring groups other than amino-acyl groups; GO:0009567,double fertilization forming a zygote and endosperm; GO:0006355,regulation of DNA-templated transcription; GO:0003674,molecular_function; GO:0003824,catalytic activity; GO:0016740,transferase activity; GO:0016746,acyltransferase activity; GO:0000003,reproduct…	PF02458.18:Transferase family	1.9751	2.305	1.6479	13.7581	17.3129	16.6721	32.0689	36.7233	35.2055	-2.83573	3.21e-45	1.17e-43	-3.9395	5.51e-106	1.4e-104	1.10861	9.57e-22	6.78e-21
Pcab053823	scaffold_201	286835	287940	+	K13065 shikimate O-hydroxycinnamoyltransferase [EC:2.3.1.133] | (RefSeq) hypothetical protein (A)	up	down	NA	ko00940: Phenylpropanoid biosynthesis; ko00941: Flavonoid biosynthesis; ko00945: Stilbenoid, diarylheptanoid and gingerol biosynthesis; ko01100: Metabolic pathways; ko01110: Biosynthesis of secondary metabolites	Shikimate O-hydroxycinnamoyltransferase [Handroanthus impetiginosus]	CER2_ARATH RecName: Full=Protein ECERIFERUM 2;	A0A2G9HQC9_9LAMI SubName: Full=Shikimate O-hydroxycinnamoyltransferase {ECO:0000313|EMBL:PIN19717.1}; EC=2.3.1.133 {ECO:0000313|EMBL:PIN19717.1};	--	GO:0005783,endoplasmic reticulum; GO:0005634,nucleus; GO:0016747,acyltransferase activity, transferring groups other than amino-acyl groups; GO:0071555,cell wall organization; GO:0009555,pollen development; GO:0042761,very long-chain fatty acid biosynthetic process; GO:0010025,wax biosynthetic process; GO:0003674,molecular_function; GO:0003824,catalytic activity; GO:0016740,transferase activity; …	PF02458.18:Transferase family	0.1314	0	0.6763	0.8379	0.7635	1.2554	3.9813	6.7748	4.7662	NA	NA	NA	-4.09173	3.62e-08	1.07e-07	2.43233	6.45e-07	1.99e-06
Pcab053824	scaffold_201	302094	303138	+	K13065 shikimate O-hydroxycinnamoyltransferase [EC:2.3.1.133] | (RefSeq) shikimate O-hydroxycinnamoyltransferase-like (A)	up	down	NA	ko00940: Phenylpropanoid biosynthesis; ko00941: Flavonoid biosynthesis; ko00945: Stilbenoid, diarylheptanoid and gingerol biosynthesis; ko01100: Metabolic pathways; ko01110: Biosynthesis of secondary metabolites	hypothetical protein Pfo_016738 [Paulownia fortunei]	CER2_ARATH RecName: Full=Protein ECERIFERUM 2;	A0A2G9HQC9_9LAMI SubName: Full=Shikimate O-hydroxycinnamoyltransferase {ECO:0000313|EMBL:PIN19717.1}; EC=2.3.1.133 {ECO:0000313|EMBL:PIN19717.1};	--	GO:0005783,endoplasmic reticulum; GO:0005634,nucleus; GO:0016747,acyltransferase activity, transferring groups other than amino-acyl groups; GO:0071555,cell wall organization; GO:0009555,pollen development; GO:0042761,very long-chain fatty acid biosynthetic process; GO:0010025,wax biosynthetic process; GO:0003674,molecular_function; GO:0003824,catalytic activity; GO:0016740,transferase activity; …	PF02458.18:Transferase family	0.7385	0.2472	0.591	1.1956	0.8738	0.3135	5.6956	5.7828	4.9279	NA	NA	NA	-3.18522	4.33e-12	1.7e-11	2.75781	1.15e-11	5.15e-11
Pcab061375	scaffold_202	1406419	1410524	-	K13065 shikimate O-hydroxycinnamoyltransferase [EC:2.3.1.133] | (RefSeq) acyltransferase Pun1-like (A)	up	down	FALSE	ko00940: Phenylpropanoid biosynthesis; ko00941: Flavonoid biosynthesis; ko00945: Stilbenoid, diarylheptanoid and gingerol biosynthesis; ko01100: Metabolic pathways; ko01110: Biosynthesis of secondary metabolites	hypothetical protein Pfo_000079 [Paulownia fortunei]	CIA2_ARATH RecName: Full=Protein CHLOROPLAST IMPORT APPARATUS 2; Flags: Precursor;	A0A022PR39_ERYGU RecName: Full=CCT domain-containing protein {ECO:0000259|PROSITE:PS51017};	GATA-4/5/6 transcription factors	GO:0009507,chloroplast; GO:0005634,nucleus; GO:0045036,protein targeting to chloroplast; GO:0006355,regulation of DNA-templated transcription; GO:0006605,protein targeting; GO:0006810,transport; GO:0006886,intracellular protein transport; GO:0008104,protein localization; GO:0008150,biological_process; GO:0009987,cellular process; GO:0015031,protein transport; GO:0033036,macromolecule localization…	PF06203.17:CCT motif	0.3235	0.2436	0.5825	0.7732	0.3914	0.3862	11.8383	9.7818	13.4239	-0.267849	0.660849	0.765971	-4.7427	1.02e-47	1.18e-46	4.47083	1.71e-55	2.68e-54
Pcab064560	scaffold_358	260279	261196	-	K13065 shikimate O-hydroxycinnamoyltransferase [EC:2.3.1.133] | (RefSeq) shikimate O-hydroxycinnamoyltransferase-like (A)	FALSE	down	down	ko00940: Phenylpropanoid biosynthesis; ko00941: Flavonoid biosynthesis; ko00945: Stilbenoid, diarylheptanoid and gingerol biosynthesis; ko01100: Metabolic pathways; ko01110: Biosynthesis of secondary metabolites	hypothetical protein Pfo_016738 [Paulownia fortunei]	CER2_ARATH RecName: Full=Protein ECERIFERUM 2;	A0A2G9HQC9_9LAMI SubName: Full=Shikimate O-hydroxycinnamoyltransferase {ECO:0000313|EMBL:PIN19717.1}; EC=2.3.1.133 {ECO:0000313|EMBL:PIN19717.1};	--	GO:0005783,endoplasmic reticulum; GO:0005634,nucleus; GO:0016747,acyltransferase activity, transferring groups other than amino-acyl groups; GO:0071555,cell wall organization; GO:0009555,pollen development; GO:0042761,very long-chain fatty acid biosynthetic process; GO:0010025,wax biosynthetic process; GO:0003674,molecular_function; GO:0003824,catalytic activity; GO:0016740,transferase activity; …	PF02458.18:Transferase family	0.1518	0	0.3124	1.7277	1.0285	1.1597	1.6281	2.3947	2.1498	-2.9157	0.000421284	0.00158269	-3.55397	5.36e-06	1.29e-05	0.642583	0.145135	0.199424
Pcab064561	scaffold_358	270676	278275	-	K13065 shikimate O-hydroxycinnamoyltransferase [EC:2.3.1.133] | (RefSeq) hypothetical protein (A)	FALSE	down	NA	ko00940: Phenylpropanoid biosynthesis; ko00941: Flavonoid biosynthesis; ko00945: Stilbenoid, diarylheptanoid and gingerol biosynthesis; ko01100: Metabolic pathways; ko01110: Biosynthesis of secondary metabolites	Shikimate O-hydroxycinnamoyltransferase [Handroanthus impetiginosus]	CER2_ARATH RecName: Full=Protein ECERIFERUM 2;	A0A2G9HQC9_9LAMI SubName: Full=Shikimate O-hydroxycinnamoyltransferase {ECO:0000313|EMBL:PIN19717.1}; EC=2.3.1.133 {ECO:0000313|EMBL:PIN19717.1};	--	GO:0005783,endoplasmic reticulum; GO:0005634,nucleus; GO:0016747,acyltransferase activity, transferring groups other than amino-acyl groups; GO:0071555,cell wall organization; GO:0009555,pollen development; GO:0042761,very long-chain fatty acid biosynthetic process; GO:0010025,wax biosynthetic process; GO:0003674,molecular_function; GO:0003824,catalytic activity; GO:0016740,transferase activity; …	PF02458.18:Transferase family	0	0	0.1408	0.7479	0.6625	1.3072	1.2091	2.8793	2.1712	NA	NA	NA	-5.2104	0.000146281	0.000300918	1.20076	0.0633128	0.0956255
Pcab070812	scaffold_328	518485	523948	+	K13065 shikimate O-hydroxycinnamoyltransferase [EC:2.3.1.133] | (RefSeq) spermidine hydroxycinnamoyl transferase-like (A)	up	down	FALSE	ko00940: Phenylpropanoid biosynthesis; ko00941: Flavonoid biosynthesis; ko00945: Stilbenoid, diarylheptanoid and gingerol biosynthesis; ko01100: Metabolic pathways; ko01110: Biosynthesis of secondary metabolites	hypothetical protein BUALT_Bualt12G0077000 [Buddleja alternifolia]	NIN1_ORYSJ RecName: Full=Neutral/alkaline invertase 1, mitochondrial {ECO:0000305}; Short=OsNIN1 {ECO:0000303|PubMed:17086397}; EC=3.2.1.26 {ECO:0000269|PubMed:17086397}; Flags: Precursor;	A0A022QAB9_ERYGU SubName: Full=Uncharacterized protein {ECO:0000313|EMBL:EYU25632.1};	--	GO:0005739,mitochondrion; GO:0033926,glycopeptide alpha-N-acetylgalactosaminidase activity; GO:0004575,sucrose alpha-glucosidase activity; GO:0005987,sucrose catabolic process; GO:0003674,molecular_function; GO:0003824,catalytic activity; GO:0004553,hydrolase activity, hydrolyzing O-glycosyl compounds; GO:0016787,hydrolase activity; GO:0016798,hydrolase activity, acting on glycosyl bonds; GO:0140…	PF02458.18:Transferase family	2.9895	3.0019	2.4237	4.0425	4.9113	3.8935	10.4041	10.3866	9.2388	-0.437294	0.164372	0.27385	-1.6403	1.13e-09	3.78e-09	1.20752	3.98e-07	1.25e-06
Pcab072368	scaffold_518	26471	27814	-	K13065 shikimate O-hydroxycinnamoyltransferase [EC:2.3.1.133] | (RefSeq) spermidine hydroxycinnamoyl transferase (A)	up	down	FALSE	ko00940: Phenylpropanoid biosynthesis; ko00941: Flavonoid biosynthesis; ko00945: Stilbenoid, diarylheptanoid and gingerol biosynthesis; ko01100: Metabolic pathways; ko01110: Biosynthesis of secondary metabolites	hypothetical protein Pfo_000710 [Paulownia fortunei]	SHT_ARATH RecName: Full=Spermidine hydroxycinnamoyl transferase {ECO:0000303|PubMed:19077165}; Short=AtSHT {ECO:0000303|PubMed:33519864}; EC=2.3.1.- {ECO:0000269|PubMed:19077165}; AltName: Full=BAHD-like hydroxycinnamoyl transferase {ECO:0000303|PubMed:19077165};	A0A6I9TRL8_SESIN SubName: Full=spermidine hydroxycinnamoyl transferase {ECO:0000313|RefSeq:XP_011083883.1};	--	GO:0016747,acyltransferase activity, transferring groups other than amino-acyl groups; GO:0016410,N-acyltransferase activity; GO:0080074,spermidine:caffeoyl CoA N-acyltransferase activity; GO:0080073,spermidine:coumaroyl CoA N-acyltransferase activity; GO:0080075,spermidine:feruloyl CoA N-acyltransferase activity; GO:0080072,spermidine:sinapoyl CoA N-acyltransferase activity; GO:0009555,pollen de…	PF02458.18:Transferase family	30.167	28.3665	27.2019	44.2305	45.1125	42.1786	87.7237	95.4143	94.5049	-0.445105	7.1e-08	4.75e-07	-1.50251	7.91e-74	1.37e-72	1.06157	1.44e-44	1.86e-43
Pcab074455	scaffold_1031	313627	317184	-	K13065 shikimate O-hydroxycinnamoyltransferase [EC:2.3.1.133] | (RefSeq) shikimate O-hydroxycinnamoyltransferase-like (A)	up	down	FALSE	ko00940: Phenylpropanoid biosynthesis; ko00941: Flavonoid biosynthesis; ko00945: Stilbenoid, diarylheptanoid and gingerol biosynthesis; ko01100: Metabolic pathways; ko01110: Biosynthesis of secondary metabolites	hypothetical protein Pfo_016364 [Paulownia fortunei]	CER26_ARATH RecName: Full=Protein ECERIFERUM 26; AltName: Full=CER2-like protein 1; Short=CER2-like1;	A0A2G9GTA8_9LAMI SubName: Full=Uncharacterized protein {ECO:0000313|EMBL:PIN08462.1};	--	GO:0005829,cytosol; GO:0016747,acyltransferase activity, transferring groups other than amino-acyl groups; GO:0071555,cell wall organization; GO:0042761,very long-chain fatty acid biosynthetic process; GO:0010025,wax biosynthetic process; GO:0003674,molecular_function; GO:0003824,catalytic activity; GO:0016740,transferase activity; GO:0016746,acyltransferase activity; GO:0008150,biological_proces…	PF02458.18:Transferase family	0.6466	0.606	0.1774	0.4711	0.8347	0.8235	4.026	4.852	4.7384	-0.394587	0.486309	0.618611	-3.05361	1.23e-16	6.16e-16	2.66782	1.52e-17	9.19e-17
Pcab074720	scaffold_1200	329634	333233	-	K13065 shikimate O-hydroxycinnamoyltransferase [EC:2.3.1.133] | (RefSeq) shikimate O-hydroxycinnamoyltransferase-like (A)	up	down	down	ko00940: Phenylpropanoid biosynthesis; ko00941: Flavonoid biosynthesis; ko00945: Stilbenoid, diarylheptanoid and gingerol biosynthesis; ko01100: Metabolic pathways; ko01110: Biosynthesis of secondary metabolites	hypothetical protein Pfo_016364 [Paulownia fortunei]	CER26_ARATH RecName: Full=Protein ECERIFERUM 26; AltName: Full=CER2-like protein 1; Short=CER2-like1;	A0A6I9TSF0_SESIN SubName: Full=protein ECERIFERUM 26-like {ECO:0000313|RefSeq:XP_011084205.1};	--	GO:0005829,cytosol; GO:0016747,acyltransferase activity, transferring groups other than amino-acyl groups; GO:0071555,cell wall organization; GO:0042761,very long-chain fatty acid biosynthetic process; GO:0010025,wax biosynthetic process; GO:0003674,molecular_function; GO:0003824,catalytic activity; GO:0016740,transferase activity; GO:0016746,acyltransferase activity; GO:0008150,biological_proces…	PF02458.18:Transferase family	0.233	0.1404	0.2397	1.1034	1.3985	0.7121	3.8226	4.7545	4.7522	-2.22092	0.000353616	0.00135145	-4.25333	1.79e-18	9.63e-18	2.03745	1.89e-11	8.32e-11
Pcab074900	scaffold_592	520057	521364	+	K13065 shikimate O-hydroxycinnamoyltransferase [EC:2.3.1.133] | (RefSeq) agmatine coumaroyltransferase-2 (A)	up	down	NA	ko00940: Phenylpropanoid biosynthesis; ko00941: Flavonoid biosynthesis; ko00945: Stilbenoid, diarylheptanoid and gingerol biosynthesis; ko01100: Metabolic pathways; ko01110: Biosynthesis of secondary metabolites	hypothetical protein Pfo_018010 [Paulownia fortunei]	AHT1_ORYSJ RecName: Full=Agmatine hydroxycinnamoyltransferase 1 {ECO:0000303|PubMed:27354554}; Short=OsAHT1 {ECO:0000303|PubMed:27354554}; EC=2.3.1.- {ECO:0000305}; AltName: Full=Agmatine hydroxycinnamoyl transferase {ECO:0000303|PubMed:24908251};	A0A6I9U7W8_SESIN SubName: Full=agmatine coumaroyltransferase-2 {ECO:0000313|RefSeq:XP_011089981.1};	--	GO:0016747,acyltransferase activity, transferring groups other than amino-acyl groups; GO:0050734,hydroxycinnamoyltransferase activity; GO:0003674,molecular_function; GO:0003824,catalytic activity; GO:0016740,transferase activity; GO:0016746,acyltransferase activity	PF02458.18:Transferase family	0	0	0	0	0	0.0509	2.1509	2.409	2.9572	NA	NA	NA	-7.79265	3.83e-10	1.32e-09	7.10537	9.3e-09	3.37e-08
Pcab078384	scaffold_313	463309	469703	-	K13065 shikimate O-hydroxycinnamoyltransferase [EC:2.3.1.133] | (RefSeq) vinorine synthase-like (A)	up	down	NA	ko00940: Phenylpropanoid biosynthesis; ko00941: Flavonoid biosynthesis; ko00945: Stilbenoid, diarylheptanoid and gingerol biosynthesis; ko01100: Metabolic pathways; ko01110: Biosynthesis of secondary metabolites	hypothetical protein Pfo_020317 [Paulownia fortunei]	SAT_CATRO RecName: Full=Stemmadenine O-acetyltransferase {ECO:0000303|PubMed:29511102}; Short=CrSAT {ECO:0000303|PubMed:29511102}; EC=1.7.1.- {ECO:0000269|PubMed:29511102};	A0A830BDN1_9LAMI SubName: Full=Vinorine synthase {ECO:0000313|EMBL:GFP85046.1};	--	GO:0016746,acyltransferase activity; GO:0016491,oxidoreductase activity; GO:0009820,alkaloid metabolic process; GO:0003674,molecular_function; GO:0003824,catalytic activity; GO:0016740,transferase activity; GO:0006807,nitrogen compound metabolic process; GO:0008150,biological_process; GO:0008152,metabolic process; GO:0071704,organic substance metabolic process; GO:1901564,organonitrogen compound …	PF02458.18:Transferase family	0	0	0	0.1195	0.1905	0.0627	7.4508	7.383	8.0278	NA	NA	NA	-9.09448	4.45e-14	1.96e-13	5.92618	1.06e-20	7.21e-20
Pcab084460	scaffold_537	298000	302111	-	K13065 shikimate O-hydroxycinnamoyltransferase [EC:2.3.1.133] | (RefSeq) acyltransferase Pun1-like (A)	up	down	FALSE	ko00940: Phenylpropanoid biosynthesis; ko00941: Flavonoid biosynthesis; ko00945: Stilbenoid, diarylheptanoid and gingerol biosynthesis; ko01100: Metabolic pathways; ko01110: Biosynthesis of secondary metabolites	hypothetical protein Pfo_000079 [Paulownia fortunei]	CIA2_ARATH RecName: Full=Protein CHLOROPLAST IMPORT APPARATUS 2; Flags: Precursor;	A0A022PR39_ERYGU RecName: Full=CCT domain-containing protein {ECO:0000259|PROSITE:PS51017};	GATA-4/5/6 transcription factors	GO:0009507,chloroplast; GO:0005634,nucleus; GO:0045036,protein targeting to chloroplast; GO:0006355,regulation of DNA-templated transcription; GO:0006605,protein targeting; GO:0006810,transport; GO:0006886,intracellular protein transport; GO:0008104,protein localization; GO:0008150,biological_process; GO:0009987,cellular process; GO:0015031,protein transport; GO:0033036,macromolecule localization…	PF06203.17:CCT motif	0.1211	0.2432	0.3738	0.5881	0.8206	0.771	8.9652	8.4486	8.5983	-1.39506	0.0214538	0.0511865	-4.95242	2.5e-37	2.33e-36	3.5631	5.86e-44	7.48e-43
Pcab089572	scaffold_866	517049	518392	-	K13065 shikimate O-hydroxycinnamoyltransferase [EC:2.3.1.133] | (RefSeq) vinorine synthase-like (A)	FALSE	down	down	ko00940: Phenylpropanoid biosynthesis; ko00941: Flavonoid biosynthesis; ko00945: Stilbenoid, diarylheptanoid and gingerol biosynthesis; ko01100: Metabolic pathways; ko01110: Biosynthesis of secondary metabolites	hypothetical protein Pfo_021362 [Paulownia fortunei]	SAT_CATRO RecName: Full=Stemmadenine O-acetyltransferase {ECO:0000303|PubMed:29511102}; Short=CrSAT {ECO:0000303|PubMed:29511102}; EC=1.7.1.- {ECO:0000269|PubMed:29511102};	A0A6I9UQX6_SESIN SubName: Full=vinorine synthase {ECO:0000313|RefSeq:XP_011101142.1};	--	GO:0016746,acyltransferase activity; GO:0016491,oxidoreductase activity; GO:0009820,alkaloid metabolic process; GO:0003674,molecular_function; GO:0003824,catalytic activity; GO:0016740,transferase activity; GO:0006807,nitrogen compound metabolic process; GO:0008150,biological_process; GO:0008152,metabolic process; GO:0071704,organic substance metabolic process; GO:1901564,organonitrogen compound …	PF02458.18:Transferase family	0.1555	0	0	1.1801	1.2545	2.2277	1.8971	2.0719	1.4684	-4.71594	9.04e-07	5.29e-06	-4.91837	2.47e-07	6.79e-07	0.207831	0.582336	0.652123
Pcab092560	scaffold_416	830998	831882	-	K13065 shikimate O-hydroxycinnamoyltransferase [EC:2.3.1.133] | (RefSeq) shikimate O-hydroxycinnamoyltransferase-like (A)	up	down	NA	ko00940: Phenylpropanoid biosynthesis; ko00941: Flavonoid biosynthesis; ko00945: Stilbenoid, diarylheptanoid and gingerol biosynthesis; ko01100: Metabolic pathways; ko01110: Biosynthesis of secondary metabolites	hypothetical protein Pfo_016738 [Paulownia fortunei]	CER2_ARATH RecName: Full=Protein ECERIFERUM 2;	A0A2G9HQC9_9LAMI SubName: Full=Shikimate O-hydroxycinnamoyltransferase {ECO:0000313|EMBL:PIN19717.1}; EC=2.3.1.133 {ECO:0000313|EMBL:PIN19717.1};	--	GO:0005783,endoplasmic reticulum; GO:0005634,nucleus; GO:0016747,acyltransferase activity, transferring groups other than amino-acyl groups; GO:0071555,cell wall organization; GO:0009555,pollen development; GO:0042761,very long-chain fatty acid biosynthetic process; GO:0010025,wax biosynthetic process; GO:0003674,molecular_function; GO:0003824,catalytic activity; GO:0016740,transferase activity; …	PF02458.18:Transferase family	0.2361	0.2371	0.243	1.9355	0.8383	1.0525	3.9738	4.14	2.3191	NA	NA	NA	-3.66895	5.21e-09	1.65e-08	1.42233	0.00068725	0.00147637
Pcab092561	scaffold_416	846025	846823	-	K13065 shikimate O-hydroxycinnamoyltransferase [EC:2.3.1.133] | (RefSeq) shikimate O-hydroxycinnamoyltransferase-like (A)	up	down	NA	ko00940: Phenylpropanoid biosynthesis; ko00941: Flavonoid biosynthesis; ko00945: Stilbenoid, diarylheptanoid and gingerol biosynthesis; ko01100: Metabolic pathways; ko01110: Biosynthesis of secondary metabolites	Shikimate O-hydroxycinnamoyltransferase [Handroanthus impetiginosus]	CER2_ARATH RecName: Full=Protein ECERIFERUM 2;	A0A2G9HQC9_9LAMI SubName: Full=Shikimate O-hydroxycinnamoyltransferase {ECO:0000313|EMBL:PIN19717.1}; EC=2.3.1.133 {ECO:0000313|EMBL:PIN19717.1};	--	GO:0005783,endoplasmic reticulum; GO:0005634,nucleus; GO:0016747,acyltransferase activity, transferring groups other than amino-acyl groups; GO:0071555,cell wall organization; GO:0009555,pollen development; GO:0042761,very long-chain fatty acid biosynthetic process; GO:0010025,wax biosynthetic process; GO:0003674,molecular_function; GO:0003824,catalytic activity; GO:0016740,transferase activity; …	PF02458.18:Transferase family	0	0.1442	0	0.3924	0.6953	0.4116	3.8068	3.9283	4.5574	NA	NA	NA	-6.10774	1.83e-06	4.63e-06	3.02424	1.14e-06	3.41e-06
Pcab101112	scaffold_1004	267230	269437	+	K13065 shikimate O-hydroxycinnamoyltransferase [EC:2.3.1.133] | (RefSeq) shikimate O-hydroxycinnamoyltransferase (A)	up	down	NA	ko00940: Phenylpropanoid biosynthesis; ko00941: Flavonoid biosynthesis; ko00945: Stilbenoid, diarylheptanoid and gingerol biosynthesis; ko01100: Metabolic pathways; ko01110: Biosynthesis of secondary metabolites	hypothetical protein Pfo_020140 [Paulownia fortunei]	HST_TOBAC RecName: Full=Shikimate O-hydroxycinnamoyltransferase; EC=2.3.1.133; AltName: Full=Hydroxycinnamoyl transferase; AltName: Full=Hydroxycinnamoyl-Coenzyme A shikimate/quinate hydroxycinnamoyltransferase;	A0A6I9THQ9_SESIN SubName: Full=shikimate O-hydroxycinnamoyltransferase {ECO:0000313|RefSeq:XP_011082506.1};	--	GO:0016747,acyltransferase activity, transferring groups other than amino-acyl groups; GO:0047172,shikimate O-hydroxycinnamoyltransferase activity; GO:0003674,molecular_function; GO:0003824,catalytic activity; GO:0016740,transferase activity; GO:0016746,acyltransferase activity; GO:0008374,O-acyltransferase activity; GO:0050734,hydroxycinnamoyltransferase activity; GO:0050737,O-hydroxycinnamoyltr…	PF02458.18:Transferase family	0	0	0	0.1493	0.0529	0	23.5832	21.9547	27.5516	NA	NA	NA	-11.0352	1.46e-20	8.52e-20	8.4529	1.35e-30	1.26e-29
Pcab101346	scaffold_1641	246722	248026	+	K13065 shikimate O-hydroxycinnamoyltransferase [EC:2.3.1.133] | (RefSeq) fatty alcohol:caffeoyl-CoA acyltransferase-like (A)	up	down	down	ko00940: Phenylpropanoid biosynthesis; ko00941: Flavonoid biosynthesis; ko00945: Stilbenoid, diarylheptanoid and gingerol biosynthesis; ko01100: Metabolic pathways; ko01110: Biosynthesis of secondary metabolites	hypothetical protein Pfo_030795 [Paulownia fortunei]	GLC_ARATH RecName: Full=Acyltransferase GLAUCE {ECO:0000303|PubMed:17965055, ECO:0000303|PubMed:22872756}; EC=2.3.1.- {ECO:0000305};	A0A4D9B4C2_SALSN SubName: Full=Uncharacterized protein {ECO:0000313|EMBL:TEY73872.1};	--	GO:0005737,cytoplasm; GO:0005634,nucleus; GO:0016747,acyltransferase activity, transferring groups other than amino-acyl groups; GO:0009567,double fertilization forming a zygote and endosperm; GO:0006355,regulation of DNA-templated transcription; GO:0003674,molecular_function; GO:0003824,catalytic activity; GO:0016740,transferase activity; GO:0016746,acyltransferase activity; GO:0000003,reproduct…	PF02458.18:Transferase family	1.6015	0.9649	1.9775	13.4664	14.1604	14.6327	34.3595	34.2526	39.2583	-3.04769	9.51e-44	3.34e-42	-4.3798	6.32e-107	1.63e-105	1.33626	3.56e-33	3.56e-32
Pcab101448	scaffold_803	263326	266775	+	K13065 shikimate O-hydroxycinnamoyltransferase [EC:2.3.1.133] | (RefSeq) acyltransferase Pun1-like (A)	up	down	NA	ko00940: Phenylpropanoid biosynthesis; ko00941: Flavonoid biosynthesis; ko00945: Stilbenoid, diarylheptanoid and gingerol biosynthesis; ko01100: Metabolic pathways; ko01110: Biosynthesis of secondary metabolites	hypothetical protein Pfo_000079 [Paulownia fortunei]	CIA2_ARATH RecName: Full=Protein CHLOROPLAST IMPORT APPARATUS 2; Flags: Precursor;	A0A022PR39_ERYGU RecName: Full=CCT domain-containing protein {ECO:0000259|PROSITE:PS51017};	GATA-4/5/6 transcription factors	GO:0009507,chloroplast; GO:0005634,nucleus; GO:0045036,protein targeting to chloroplast; GO:0006355,regulation of DNA-templated transcription; GO:0006605,protein targeting; GO:0006810,transport; GO:0006886,intracellular protein transport; GO:0008104,protein localization; GO:0008150,biological_process; GO:0009987,cellular process; GO:0015031,protein transport; GO:0033036,macromolecule localization…	PF06203.17:CCT motif	0.0405	0.0813	0.0834	0.5902	0.3529	0.4255	8.6898	8.0095	10.0052	NA	NA	NA	-6.83471	3.37e-24	2.23e-23	4.2634	1.51e-45	2e-44
Pcab105587	scaffold_1065	363947	366572	+	K13065 shikimate O-hydroxycinnamoyltransferase [EC:2.3.1.133] | (RefSeq) acyltransferase Pun1-like (A)	up	down	NA	ko00940: Phenylpropanoid biosynthesis; ko00941: Flavonoid biosynthesis; ko00945: Stilbenoid, diarylheptanoid and gingerol biosynthesis; ko01100: Metabolic pathways; ko01110: Biosynthesis of secondary metabolites	hypothetical protein Pfo_000079 [Paulownia fortunei]	CIA2_ARATH RecName: Full=Protein CHLOROPLAST IMPORT APPARATUS 2; Flags: Precursor;	A0A022PR39_ERYGU RecName: Full=CCT domain-containing protein {ECO:0000259|PROSITE:PS51017};	GATA-4/5/6 transcription factors	GO:0009507,chloroplast; GO:0005634,nucleus; GO:0045036,protein targeting to chloroplast; GO:0006355,regulation of DNA-templated transcription; GO:0006605,protein targeting; GO:0006810,transport; GO:0006886,intracellular protein transport; GO:0008104,protein localization; GO:0008150,biological_process; GO:0009987,cellular process; GO:0015031,protein transport; GO:0033036,macromolecule localization…	PF06203.17:CCT motif	0	0	0.1385	0.2452	0.3258	0.3857	2.6334	2.2656	1.7542	NA	NA	NA	-5.41358	1.48e-06	3.78e-06	2.78079	5.86e-07	1.81e-06
Pcab106090	scaffold_252_1_560022	346382	349461	-	K13065 shikimate O-hydroxycinnamoyltransferase [EC:2.3.1.133] | (RefSeq) rosmarinate synthase-like (A)	up	down	NA	ko00940: Phenylpropanoid biosynthesis; ko00941: Flavonoid biosynthesis; ko00945: Stilbenoid, diarylheptanoid and gingerol biosynthesis; ko01100: Metabolic pathways; ko01110: Biosynthesis of secondary metabolites	hypothetical protein Pfo_020138 [Paulownia fortunei]	RAS_MELOI RecName: Full=Rosmarinate synthase; Short=MoRAS; EC=2.3.1.140; AltName: Full=Hydroxycinnamoyl-CoA:hydroxyphenyllactate hydroxycinnamoyltransferase;	A0A4D9AM22_SALSN SubName: Full=Uncharacterized protein {ECO:0000313|EMBL:TEY57964.1};	--	GO:0050266,rosmarinate synthase activity; GO:0003674,molecular_function; GO:0003824,catalytic activity; GO:0016740,transferase activity; GO:0016746,acyltransferase activity; GO:0016747,acyltransferase activity, transferring groups other than amino-acyl groups	PF02458.18:Transferase family	0	0.0542	0	0.7869	0.3137	0.5674	1.9765	2.7266	2.0194	NA	NA	NA	-6.64928	1.09e-07	3.08e-07	1.99174	8.52e-06	2.33e-05
Pcab117001	scaffold_2125	215814	223180	-	K13065 shikimate O-hydroxycinnamoyltransferase [EC:2.3.1.133] | (RefSeq) rosmarinate synthase-like (A)	up	down	FALSE	ko00940: Phenylpropanoid biosynthesis; ko00941: Flavonoid biosynthesis; ko00945: Stilbenoid, diarylheptanoid and gingerol biosynthesis; ko01100: Metabolic pathways; ko01110: Biosynthesis of secondary metabolites	hypothetical protein Pfo_020138 [Paulownia fortunei]	HST_TOBAC RecName: Full=Shikimate O-hydroxycinnamoyltransferase; EC=2.3.1.133; AltName: Full=Hydroxycinnamoyl transferase; AltName: Full=Hydroxycinnamoyl-Coenzyme A shikimate/quinate hydroxycinnamoyltransferase;	A0A2P5W425_GOSBA SubName: Full=Uncharacterized protein {ECO:0000313|EMBL:PPR85809.1};	--	GO:0016747,acyltransferase activity, transferring groups other than amino-acyl groups; GO:0047172,shikimate O-hydroxycinnamoyltransferase activity; GO:0003674,molecular_function; GO:0003824,catalytic activity; GO:0016740,transferase activity; GO:0016746,acyltransferase activity; GO:0008374,O-acyltransferase activity; GO:0050734,hydroxycinnamoyltransferase activity; GO:0050737,O-hydroxycinnamoyltr…	PF02458.18:Transferase family	1.9351	0.5089	1.5171	2.3917	1.6058	2.0242	3.1981	4.1195	5.1165	-0.431749	0.26865	0.400314	-1.45977	4.76e-05	0.000103513	1.0326	0.000175452	0.000408692
Pcab118546	scaffold_1939	145456	148751	-	K13065 shikimate O-hydroxycinnamoyltransferase [EC:2.3.1.133] | (RefSeq) shikimate O-hydroxycinnamoyltransferase (A)	up	down	NA	ko00940: Phenylpropanoid biosynthesis; ko00941: Flavonoid biosynthesis; ko00945: Stilbenoid, diarylheptanoid and gingerol biosynthesis; ko01100: Metabolic pathways; ko01110: Biosynthesis of secondary metabolites	hydroxycinnamoyl-CoA shikimate/quinate hydroxycinnamoyl transferase [Perilla frutescens var. frutescens]	RAS_PLESU RecName: Full=Rosmarinate synthase; Short=CbRAS; EC=2.3.1.140; AltName: Full=Hydroxycinnamoyl transferase; Short=CbHCT1;	A0A830DK72_9LAMI SubName: Full=Shikimate o-hydroxycinnamoyltransferase {ECO:0000313|EMBL:GFQ07206.1};	--	GO:0050266,rosmarinate synthase activity; GO:0003674,molecular_function; GO:0003824,catalytic activity; GO:0016740,transferase activity; GO:0016746,acyltransferase activity; GO:0016747,acyltransferase activity, transferring groups other than amino-acyl groups	PF02458.18:Transferase family	0	0	0.0552	0	0	0	1.8274	2.3129	1.7016	NA	NA	NA	-6.45569	3.05e-07	8.3e-07	7.69206	8.62e-10	3.39e-09
Pcab127699	scaffold_2463	21623	22966	-	K13065 shikimate O-hydroxycinnamoyltransferase [EC:2.3.1.133] | (RefSeq) shikimate O-hydroxycinnamoyltransferase (A)	FALSE	down	FALSE	ko00940: Phenylpropanoid biosynthesis; ko00941: Flavonoid biosynthesis; ko00945: Stilbenoid, diarylheptanoid and gingerol biosynthesis; ko01100: Metabolic pathways; ko01110: Biosynthesis of secondary metabolites	HXXXD-type acyl-transferase family protein [Perilla frutescens var. frutescens]	CFAT_PETHY RecName: Full=Coniferyl alcohol acyltransferase {ECO:0000303|PubMed:17241449}; Short=PhCFAT {ECO:0000303|PubMed:17241449}; EC=2.3.1.- {ECO:0000269|PubMed:17241449}; AltName: Full=(E)-cinnamyl alcohol acyltransferase {ECO:0000303|PubMed:17241449}; EC=2.3.1.224 {ECO:0000269|PubMed:17241449}; AltName: Full=(E)-sinapoyl alcohol acyltransferase {ECO:0000303|PubMed:17241449}; EC=2.3.1.- {ECO…	A0A6I9SLA0_SESIN SubName: Full=shikimate O-hydroxycinnamoyltransferase {ECO:0000313|RefSeq:XP_011070203.1};	--	GO:0102387,2-phenylethanol acetyltransferase activity; GO:0102720,acetyl-coenzyme A:acetyl alcohol acetyltransferase activity; GO:0034318,alcohol O-acyltransferase activity; GO:0007623,circadian rhythm; GO:0010597,green leaf volatile biosynthetic process; GO:0009699,phenylpropanoid biosynthetic process; GO:0009723,response to ethylene; GO:0003674,molecular_function; GO:0003824,catalytic activity;…	PF02458.18:Transferase family	0.5702	0.7287	0.5334	0.6137	0.8531	1.2376	0.9812	2.0719	1.7621	-0.385888	0.458721	0.59328	-1.20947	0.0133219	0.0210818	0.828779	0.0643819	0.0970295
Pcab134211	scaffold_2964	40614	46378	+	K13065 shikimate O-hydroxycinnamoyltransferase [EC:2.3.1.133] | (RefSeq) shikimate O-hydroxycinnamoyltransferase (A)	FALSE	down	NA	ko00940: Phenylpropanoid biosynthesis; ko00941: Flavonoid biosynthesis; ko00945: Stilbenoid, diarylheptanoid and gingerol biosynthesis; ko01100: Metabolic pathways; ko01110: Biosynthesis of secondary metabolites	shikimate O-hydroxycinnamoyltransferase [Sesamum indicum]	HST_TOBAC RecName: Full=Shikimate O-hydroxycinnamoyltransferase; EC=2.3.1.133; AltName: Full=Hydroxycinnamoyl transferase; AltName: Full=Hydroxycinnamoyl-Coenzyme A shikimate/quinate hydroxycinnamoyltransferase;	A0A6I9THQ9_SESIN SubName: Full=shikimate O-hydroxycinnamoyltransferase {ECO:0000313|RefSeq:XP_011082506.1};	--	GO:0016747,acyltransferase activity, transferring groups other than amino-acyl groups; GO:0047172,shikimate O-hydroxycinnamoyltransferase activity; GO:0003674,molecular_function; GO:0003824,catalytic activity; GO:0016740,transferase activity; GO:0016746,acyltransferase activity; GO:0008374,O-acyltransferase activity; GO:0050734,hydroxycinnamoyltransferase activity; GO:0050737,O-hydroxycinnamoyltr…	PF02458.18:Transferase family	0.054	0.2169	0.3334	0.2459	0.7319	0.7221	1.2268	1.7041	0.7343	NA	NA	NA	-2.4156	0.000631652	0.00120457	1.09791	0.0469915	0.0731868
novel.19002	scaffold_9626	4371	5997	+	K13065 shikimate O-hydroxycinnamoyltransferase [EC:2.3.1.133] | (RefSeq) pelargonidin 3-O-(6-caffeoylglucoside) 5-O-(6-O-malonylglucoside) 4'''-malonyltransferase-like (A)	FALSE	down	FALSE	ko00940: Phenylpropanoid biosynthesis; ko00941: Flavonoid biosynthesis; ko00945: Stilbenoid, diarylheptanoid and gingerol biosynthesis; ko01100: Metabolic pathways; ko01110: Biosynthesis of secondary metabolites	hypothetical protein Pfo_026855 [Paulownia fortunei]	SAT_CATRO RecName: Full=Stemmadenine O-acetyltransferase {ECO:0000303|PubMed:29511102}; Short=CrSAT {ECO:0000303|PubMed:29511102}; EC=1.7.1.- {ECO:0000269|PubMed:29511102};	A0A2G9H8V9_9LAMI SubName: Full=Acetyl-CoA-benzylalcohol acetyltransferase {ECO:0000313|EMBL:PIN13958.1}; EC=2.3.1.224 {ECO:0000313|EMBL:PIN13958.1};	--	GO:0016746,acyltransferase activity; GO:0016491,oxidoreductase activity; GO:0009820,alkaloid metabolic process; GO:0003674,molecular_function; GO:0003824,catalytic activity; GO:0016740,transferase activity; GO:0006807,nitrogen compound metabolic process; GO:0008150,biological_process; GO:0008152,metabolic process; GO:0071704,organic substance metabolic process; GO:1901564,organonitrogen compound …	PF02458.18:Transferase family	6.8248	7.4996	5.3002	12.5478	10.8457	14.2663	18.039	13.9513	13.4242	-0.766408	0.0014004	0.00469884	-1.01179	4.57e-05	9.96e-05	0.248698	0.233176	0.301814
novel.5910	scaffold_18853	12	529	.	K13065 shikimate O-hydroxycinnamoyltransferase [EC:2.3.1.133] | (RefSeq) omega-hydroxypalmitate O-feruloyl transferase-like isoform X1 (A)	up	down	NA	ko00940: Phenylpropanoid biosynthesis; ko00941: Flavonoid biosynthesis; ko00945: Stilbenoid, diarylheptanoid and gingerol biosynthesis; ko01100: Metabolic pathways; ko01110: Biosynthesis of secondary metabolites	hypothetical protein M569_17562, partial [Genlisea aurea]	GLC_ARATH RecName: Full=Acyltransferase GLAUCE {ECO:0000303|PubMed:17965055, ECO:0000303|PubMed:22872756}; EC=2.3.1.- {ECO:0000305};	S8BS56_9LAMI SubName: Full=Uncharacterized protein {ECO:0000313|EMBL:EPS57259.1}; Flags: Fragment;	--	GO:0005737,cytoplasm; GO:0005634,nucleus; GO:0016747,acyltransferase activity, transferring groups other than amino-acyl groups; GO:0009567,double fertilization forming a zygote and endosperm; GO:0006355,regulation of DNA-templated transcription; GO:0003674,molecular_function; GO:0003824,catalytic activity; GO:0016740,transferase activity; GO:0016746,acyltransferase activity; GO:0000003,reproduct…	PF02458.18:Transferase family	0.5379	0.9453	0.8303	0.8573	1.1718	1.0276	3.0551	2.6878	3.3527	NA	NA	NA	-1.7833	0.00306086	0.00532233	1.5575	0.00402635	0.00769363
novel.12697	scaffold_402_19828_1018131	556483	557293	.	K13065 shikimate O-hydroxycinnamoyltransferase [EC:2.3.1.133] | (RefSeq) hydroxycinnamoyltransferase 4-like (A)	up	FALSE	NA	ko00940: Phenylpropanoid biosynthesis; ko00941: Flavonoid biosynthesis; ko00945: Stilbenoid, diarylheptanoid and gingerol biosynthesis; ko01100: Metabolic pathways; ko01110: Biosynthesis of secondary metabolites	hypothetical protein Pfo_029356 [Paulownia fortunei]	POLX_TOBAC RecName: Full=Retrovirus-related Pol polyprotein from transposon TNT 1-94; Includes: RecName: Full=Protease; EC=3.4.23.-; Includes: RecName: Full=Reverse transcriptase; EC=2.7.7.49; Includes: RecName: Full=Endonuclease;	A0A438K4Q4_VITVI SubName: Full=Retrovirus-related Pol polyprotein from transposon TNT 1-94 {ECO:0000313|EMBL:RVX16186.1};	FOG: Transposon-encoded proteins with TYA, reverse transcriptase, integrase domains in various combinations	GO:0004190,aspartic-type endopeptidase activity; GO:0004519,endonuclease activity; GO:0003676,nucleic acid binding; GO:0003964,RNA-directed DNA polymerase activity; GO:0008270,zinc ion binding; GO:0015074,DNA integration; GO:0006508,proteolysis; GO:0003674,molecular_function; GO:0003824,catalytic activity; GO:0004175,endopeptidase activity; GO:0008233,peptidase activity; GO:0016787,hydrolase acti…	--	0	0.2588	0.9723	0.0782	0.4158	0.1641	0.7589	1.7168	1.5574	NA	NA	NA	-1.53995	0.0575499	0.0813055	2.61816	0.00118305	0.00245505
novel.14885	scaffold_55	3969255	3976424	-	K13065 shikimate O-hydroxycinnamoyltransferase [EC:2.3.1.133] | (RefSeq) fatty alcohol:caffeoyl-CoA acyltransferase-like (A)	FALSE	up	up	ko00940: Phenylpropanoid biosynthesis; ko00941: Flavonoid biosynthesis; ko00945: Stilbenoid, diarylheptanoid and gingerol biosynthesis; ko01100: Metabolic pathways; ko01110: Biosynthesis of secondary metabolites	alpha/beta-hydrolase family protein [Trifolium medium]	--	A0A392Q2S3_9FABA SubName: Full=Alpha/beta-hydrolase family protein {ECO:0000313|EMBL:MCI17866.1}; Flags: Fragment;	Predicted alpha/beta hydrolase	GO:0016787,hydrolase activity; GO:0003674,molecular_function; GO:0003824,catalytic activity	--	1.3449	1.6746	1.716	0.4899	0.5208	0.9248	0.6789	0.962	0.8534	1.46494	0.00100131	0.00346668	1.1094	0.0125024	0.0198689	0.357958	0.517644	0.592432
novel.8882	scaffold_2597	2754	4582	.	K13065 shikimate O-hydroxycinnamoyltransferase [EC:2.3.1.133] | (RefSeq) vinorine synthase-like (A)	up	FALSE	NA	ko00940: Phenylpropanoid biosynthesis; ko00941: Flavonoid biosynthesis; ko00945: Stilbenoid, diarylheptanoid and gingerol biosynthesis; ko01100: Metabolic pathways; ko01110: Biosynthesis of secondary metabolites	vinorine synthase-like [Sesamum indicum]	AT1_PAPSO RecName: Full=(13S,14R)-1,13-dihydroxy-N-methylcanadine 13-O-acetyltransferase AT1 {ECO:0000305}; EC=2.3.1.285 {ECO:0000269|PubMed:25485687, ECO:0000269|PubMed:27378283}; AltName: Full=Acetyltransferase 1 {ECO:0000303|PubMed:22653730}; Short=PsAT1 {ECO:0000303|PubMed:27378283};	A0A6I9U301_SESIN SubName: Full=vinorine synthase-like {ECO:0000313|RefSeq:XP_011091918.1};	--	GO:0016746,acyltransferase activity; GO:0009820,alkaloid metabolic process; GO:0003674,molecular_function; GO:0003824,catalytic activity; GO:0016740,transferase activity; GO:0006807,nitrogen compound metabolic process; GO:0008150,biological_process; GO:0008152,metabolic process; GO:0071704,organic substance metabolic process; GO:1901564,organonitrogen compound metabolic process	PF02458.18:Transferase family	0.6856	0.5355	0.4703	0.1734	0.1475	0.4729	1.1537	0.7212	0.3453	NA	NA	NA	-0.184461	0.733081	0.776053	1.46044	0.0235857	0.039203
caffeoyl quinic acid	caffeoyl shikimic acid	EC:1.14.14.96 5-O-(4-coumaroyl)-D-quinate 3'-monooxygenase
Pcab000460	scaffold_2	2954074	2959681	+	K09754 5-O-(4-coumaroyl)-D-quinate 3'-monooxygenase [EC:1.14.14.96] | (RefSeq) cytochrome P450 98A2-like (A)	down	up	FALSE	ko00940: Phenylpropanoid biosynthesis; ko00941: Flavonoid biosynthesis; ko00945: Stilbenoid, diarylheptanoid and gingerol biosynthesis; ko01100: Metabolic pathways; ko01110: Biosynthesis of secondary metabolites	hypothetical protein Pfo_005420 [Paulownia fortunei]	C98A2_SOYBN RecName: Full=Cytochrome P450 98A2; EC=1.14.-.-;	A0A2Z5U572_PERFR SubName: Full=Cytochrome P450 {ECO:0000313|EMBL:BBB04707.1};	Cytochrome P450 CYP2 subfamily	GO:0016021,integral component of membrane; GO:0016020,membrane; GO:0020037,heme binding; GO:0005506,iron ion binding; GO:0016709,oxidoreductase activity, acting on paired donors, with incorporation or reduction of molecular oxygen, NAD(P)H as one donor, and incorporation of one atom of oxygen; GO:0003674,molecular_function; GO:0005488,binding; GO:0046906,tetrapyrrole binding; GO:0097159,organic c…	PF00067.25:Cytochrome P450	9.8267	11.512	11.2854	15.0217	16.5068	14.6366	5.7949	4.4914	5.6338	-0.329687	0.00127172	0.00430135	1.23114	8.07e-18	4.23e-17	-1.55753	2.36e-32	2.31e-31
Pcab011392	scaffold_93	401964	404588	+	K09754 5-O-(4-coumaroyl)-D-quinate 3'-monooxygenase [EC:1.14.14.96] | (RefSeq) cytochrome P450 98A3-like (A)	down	up	FALSE	ko00940: Phenylpropanoid biosynthesis; ko00941: Flavonoid biosynthesis; ko00945: Stilbenoid, diarylheptanoid and gingerol biosynthesis; ko01100: Metabolic pathways; ko01110: Biosynthesis of secondary metabolites	hypothetical protein Pfo_023837 [Paulownia fortunei]	--	A0A6I9TD52_SESIN SubName: Full=uncharacterized protein LOC105162245 {ECO:0000313|RefSeq:XP_011078544.1};	--	--	--	2.3975	1.9947	1.8327	1.8715	1.26	1.701	0.1729	0.5764	0.6986	0.537292	0.151961	0.257562	2.27336	3.02e-05	6.72e-05	-1.73207	0.00270069	0.00530744
Pcab027028	scaffold_226	573815	580223	-	K09754 5-O-(4-coumaroyl)-D-quinate 3'-monooxygenase [EC:1.14.14.96] | (RefSeq) cytochrome P450 98A2-like (A)	down	FALSE	FALSE	ko00940: Phenylpropanoid biosynthesis; ko00941: Flavonoid biosynthesis; ko00945: Stilbenoid, diarylheptanoid and gingerol biosynthesis; ko01100: Metabolic pathways; ko01110: Biosynthesis of secondary metabolites	hypothetical protein Pfo_005421 [Paulownia fortunei]	C98A2_SOYBN RecName: Full=Cytochrome P450 98A2; EC=1.14.-.-;	A0A2Z5U572_PERFR SubName: Full=Cytochrome P450 {ECO:0000313|EMBL:BBB04707.1};	Cytochrome P450 CYP2 subfamily	GO:0016021,integral component of membrane; GO:0016020,membrane; GO:0020037,heme binding; GO:0005506,iron ion binding; GO:0016709,oxidoreductase activity, acting on paired donors, with incorporation or reduction of molecular oxygen, NAD(P)H as one donor, and incorporation of one atom of oxygen; GO:0003674,molecular_function; GO:0005488,binding; GO:0046906,tetrapyrrole binding; GO:0097159,organic c…	PF00067.25:Cytochrome P450	7.8234	7.2655	8.4459	12.1696	12.0833	10.8409	5.1936	5.3752	6.636	-0.405496	8.89e-05	0.000381805	0.642733	3.44e-06	8.45e-06	-1.04397	1.48e-16	8.52e-16
Pcab054486	scaffold_474	75293	82158	-	K09754 5-O-(4-coumaroyl)-D-quinate 3'-monooxygenase [EC:1.14.14.96] | (RefSeq) cytochrome P450 98A2-like (A)	FALSE	FALSE	up	ko00940: Phenylpropanoid biosynthesis; ko00941: Flavonoid biosynthesis; ko00945: Stilbenoid, diarylheptanoid and gingerol biosynthesis; ko01100: Metabolic pathways; ko01110: Biosynthesis of secondary metabolites	uncharacterized protein LOC105171185 [Sesamum indicum]	C98A2_SOYBN RecName: Full=Cytochrome P450 98A2; EC=1.14.-.-;	A0A6I9U1U8_SESIN SubName: Full=uncharacterized protein LOC105171185 {ECO:0000313|RefSeq:XP_011090516.1, ECO:0000313|RefSeq:XP_011090517.1};	Cytochrome P450 CYP2 subfamily	GO:0016021,integral component of membrane; GO:0016020,membrane; GO:0020037,heme binding; GO:0005506,iron ion binding; GO:0016709,oxidoreductase activity, acting on paired donors, with incorporation or reduction of molecular oxygen, NAD(P)H as one donor, and incorporation of one atom of oxygen; GO:0003674,molecular_function; GO:0005488,binding; GO:0046906,tetrapyrrole binding; GO:0097159,organic c…	PF04782.15:Protein of unknown function (DUF632)	2.8361	2.4551	2.1469	1.2766	1.0415	1.6501	2.0159	1.5088	2.438	1.0806	5.56e-05	0.000247997	0.515336	0.0562326	0.0796263	0.570392	0.0633039	0.0956158
[truncated: 67 more rows]

## Sheet: Key DEG pogostone
ID	chr	start	end	strand	KEGG	Leaf_vs_Stem.regulated	Root_vs_Leaf.regulated	Root_vs_Stem.regulated	KEGG pathway	NR	Swissprot	Tremble	KOG	GO	Pfam	Root-1_fpkm	Root-2_fpkm	Root-3_fpkm	Stem-1_fpkm	Stem-2_fpkm	Stem-3_fpkm	Leaf-1_fpkm	Leaf-2_fpkm	Leaf-3_fpkm	Root_vs_Stem.log2FoldChange	Root_vs_Stem.pvalue	Root_vs_Stem.padj	Root_vs_Leaf.log2FoldChange	Root_vs_Leaf.pvalue	Root_vs_Leaf.padj	Leaf_vs_Stem.log2FoldChange	Leaf_vs_Stem.pvalue	Leaf_vs_Stem.padj
[truncated: 68 more rows]
